# Supplementary material for: Evolution of gene expression in seasonal environments
Source: bioRxiv preprint, doi:10.1101/2025.03.25.645377, version 4 (2025-10-22)
Supplement: Supplementary file 3 [file 645377_file04.xlsx]

## Sheet: Sheet1
Supplementary file 3. Hierarchical clustering of 11749 gene expression dynamics
OrthogroupID	GeneID.L.edulis	GeneID.Q.glauca	GeneID.A.thaliana_L.edulis	GeneID.A.thaliana_Q.glauca	ClusterID	Qg_B_210523	Qg_B_210619	Qg_B_210718	Qg_B_210811	Qg_B_210911	Qg_B_211010	Qg_B_211105	Qg_B_211204	Qg_B_220101	Qg_B_220129	Qg_B_220226	Qg_B_220325	Qg_B_220422	Qg_B_220521	Qg_B_220617	Qg_B_220716	Qg_B_220810	Qg_B_220912	Qg_B_221006	Qg_B_221104	Qg_B_221202	Qg_B_221230	Qg_B_230123	Qg_B_230128	Qg_B_230224	Qg_B_230324	Qg_B_230421	Qa_B_210519	Qa_B_210617	Qa_B_210715	Qa_B_210815	Qa_B_210910	Qa_B_211007	Qa_B_211104	Qa_B_211203	Qa_B_211230	Qa_B_220126	Qa_B_220225	Qa_B_220324	Qa_B_220421	Qa_B_220519	Qa_B_220612	Qa_B_220713	Qa_B_220812
OG0000146	Lthed_scf0120.1_g002770.1	Qgl_scf0120.1_g002770.1	AT1G19260.1	AT1G19260.1	I	1.72206	2.03149	1.66879	2.14439	2.01327	1.86443	2.54931	2.30945	2.12836	2.38127	2.73477	2.71884	2.1095	1.23008	1.47799	2.20045	1.92002	2.0095	2.58939	2.71646	2.6758	2.6545	2.57702	2.3467	2.4987	2.88009	2.02586	2.26272	2.48959	2.34443	2.38895	2.59653	2.51096	2.39822	2.36939	1.83203	2.16293	2.32242	2.94866	2.80986	2.51783	2.0556	2.1685	2.21421
OG0000303	Lthed_scf0080.1_g102870.1	Qgl_scf0070.1_g009360.1	NA	NA	I	1.48704	3.33442	3.42691	3.44538	2.13245	2.89014	3.58511	4.45256	5.39045	4.91606	4.1252	4.14765	3.14646	0.710009	2.14832	2.36845	1.69599	2.42942	3.49147	3.54377	3.55669	4.66627	4.83787	6.54263	3.75712	4.18063	2.16255	3.31947	3.7374	3.65213	3.76076	4.00983	4.66384	4.18223	5.52759	4.63758	4.29166	3.27601	4.50171	3.91834	3.59265	3.17024	2.80051	3.11607
OG0000803	Lthed_scf0040.1_g035810.1	Qgl_scf0050.1_g101590.1	NA	NA	V	3.01586	3.01303	3.03217	1.56816	1.01088	2.53437	0.387896	1.22743	2.57617	3.14788	4.19002	0.724474	3.21483	1.40308	1.72499	1.93783	2.70316	2.04517	1.91872	0.905513	1.0768	1.52393	2.75439	2.389	2.81374	1.11554	2.74634	2.61229	1.51375	1.55749	1.1379	1.59632	1.60391	1.9375	3.18862	2.7482	4.24363	3.97901	3.30665	0.9584	1.98478	3.228	2.55852	1.7436
OG0000866	Lthed_scf0100.1_g060190.1	Qgl_scf0100.1_g052450.1	AT3G25400.1	AT3G25400.1	I	1.76505	1.42734	0	1.62739	2.30055	2.04208	2.98039	2.74241	1.18211	1.15985	1.88039	3.69393	1.20843	0.92899	0.446497	1.29009	1.10843	2.07553	2.77547	3.31082	2.98104	2.51555	1.93701	1.30809	2.28399	3.97028	1.75623	1.13157	1.6727	1.54365	1.19326	1.82863	1.70834	1.50984	1.40727	0.393011	0.913186	1.21903	1.22688	1.71261	2.03451	1.5043	1.83913	1.21784
OG0000878	Lthed_scf0030.1_g148240.1	Qgl_scf0010.1_g012870.1	AT3G08010.1	AT3G08010.1	II	4.74258	4.70473	4.43736	4.58947	4.68398	4.6755	4.4556	4.48689	4.55802	4.94296	5.03007	4.77841	4.81201	4.37993	4.58344	4.31823	4.7346	4.09898	4.08274	4.14708	3.89221	4.12588	4.00069	3.76823	4.86184	4.30958	4.87849	4.89801	4.6474	4.36129	4.41751	4.47113	4.11375	5.12511	5.03108	4.94478	5.25941	5.37659	5.85292	5.48878	5.1307	5.19683	4.53083	4.61237
OG0000891	Lthed_scf0020.1_g149580.1	Qgl_scf0030.1_g029990.1	AT1G62310.1	AT1G62310.1	V	3.78918	3.65939	3.89104	4.07358	4.01517	3.91905	3.4919	3.32284	2.66502	2.98833	3.39764	3.35915	3.78149	3.3954	3.21565	3.64862	3.94325	3.79134	3.61006	3.44591	2.77619	2.86163	2.92466	3.08758	3.30798	3.75989	3.34405	3.37857	3.28625	3.58114	2.91972	3.19977	3.40922	3.06202	2.93559	2.94944	3.19447	3.15383	3.01496	2.86261	3.16774	3.29065	3.44657	2.93322
OG0001009	Lthed_scf0100.1_g022950.1	Qgl_scf0100.1_g084310.1	AT4G16150.1	AT4G16150.1	I	5.66478	5.77336	5.91679	5.60625	5.71879	5.87942	5.92987	5.82747	5.74206	6.0244	5.81945	5.0959	5.69897	5.82864	5.9459	6.14661	6.38417	5.94539	6.04274	6.03855	5.93455	6.31623	6.2846	7.03548	5.84884	5.17815	5.70223	5.46561	5.64615	5.70394	5.86093	5.84431	5.9615	5.82044	6.00527	6.47372	6.60835	6.04716	5.53432	5.43485	5.57908	5.76094	5.97687	5.89689
OG0001022	Lthed_scf0100.1_g061200.1	Qgl_scf0100.1_g051680.1	AT5G09330.5	AT5G09330.5	IV	5.07679	5.01337	5.16192	4.9861	4.94498	5.00593	4.99643	5.22289	5.57869	5.63869	5.6332	4.86727	4.95539	4.65756	5.30488	4.99387	5.04537	5.14931	5.07618	5.10513	5.32124	5.16581	5.64634	5.83059	5.43545	4.89716	4.91515	5.30136	4.83988	4.92226	4.95679	5.0336	4.89978	5.15365	5.21857	5.53069	5.70332	6.22795	5.71639	4.85878	4.69202	4.96089	5.47734	5.07566
OG0001046	Lthed_scf0020.1_g111720.1	Qgl_scf0030.1_g067010.1	AT1G17020.1	AT1G17020.1	I	0.245653	0	0	0	0	0	0	1.24044	0.852432	0.10936	0.183045	0	0	0.0956212	0	0	0	0	0	0	0.059639	0.238318	0.223521	0.318595	0.062168	0	0.27939	0.218618	0.510783	0.330715	0.15629	0.0627038	0.0662352	0.173933	0.197105	1.69783	0.385523	0.288698	0.282776	0.0700914	0.184356	0.0932179	0.370401	0.365077
OG0001168	Lthed_scf0050.1_g099110.1	Qgl_scf0040.1_g118590.1	AT5G27550.2	AT5G27550.2	I	2.54334	2.32161	1.85744	2.98277	2.46997	2.001	2.64634	1.66409	0.771454	0.49451	0.517185	4.04502	3.59674	2.65756	2.33863	1.87377	1.14377	1.7984	2.82743	2.42006	1.79006	0.897058	0.784868	0.596992	0.92349	4.24647	2.89689	2.04716	3.02834	2.8677	1.83428	1.85065	1.85667	0.900375	0.311057	0.523571	0.575476	0.814499	1.9913	3.39174	3.23211	1.78308	1.55163	1.81546
OG0001178	Lthed_scf0120.1_g057220.1	Qgl_scf0120.1_g051010.1	AT1G02840.1	AT1G02840.1	V	6.55804	6.34051	5.72765	6.46779	6.57872	6.30979	6.85497	6.6872	6.70002	6.73608	6.6067	7.3104	6.76567	6.57564	6.12969	6.27878	6.01812	6.10752	6.77192	6.71838	6.76435	6.75197	7.1663	6.70665	6.85721	7.14054	6.50721	6.47943	6.55991	6.2296	6.43073	6.47215	6.37587	6.67159	6.40838	6.101	6.0243	5.82237	6.41887	6.93591	6.56124	6.36251	5.85994	6.41176
OG0001184	Lthed_scf0080.1_g101990.1	Qgl_scf0070.1_g010410.1	AT4G30110.2	AT4G30110.2	II	1.83272	2.21029	1.4391	1.46669	1.64938	1.77445	2.49506	2.08585	1.4481	1.31856	1.76926	2.65066	1.90563	2.91344	3.32537	2.04318	1.17288	1.60526	1.55205	1.7876	1.72816	1.71654	1.49579	1.47563	1.40707	3.57058	2.42674	1.62	1.59929	0.945222	0.812711	1.09196	1.63359	1.31847	1.22128	1.23055	1.28668	1.42494	1.78256	2.24231	1.14224	1.56338	2.04824	2.49731
OG0001185	Lthed_scf0120.1_g052100.1	Qgl_scf0120.1_g046930.1	AT5G10630.3	AT5G10630.3	IV	4.11369	3.82033	4.07156	3.85889	3.69439	4.08327	4.08999	4.29547	4.38091	4.82365	4.5101	4.16367	3.95342	3.80936	3.74825	3.82356	4.3503	4.05539	4.03588	4.03298	4.23734	4.42843	4.55578	4.42914	4.43897	4.24872	3.95755	4.31688	4.21018	4.09872	4.37567	4.31126	4.20294	4.40059	4.73648	5.07484	5.44802	5.03007	4.62723	4.34694	4.24752	4.18879	4.18647	4.08387
OG0001220	Lthed_scf0110.1_g089660.1	Qgl_scf0110.1_g009520.1	AT2G36950.1	AT2G36950.1	III	6.76866	6.71942	6.73728	7.3148	6.44886	6.35998	6.47199	6.81909	5.55919	4.57347	4.82744	5.57132	5.99448	6.19778	6.48574	6.16241	6.05346	6.22125	6.01354	6.06116	5.95561	4.8367	4.84662	4.11015	4.15311	6.28916	6.99893	5.93093	5.95633	5.41263	5.49164	5.31411	5.19462	4.64232	2.15406	1.83562	2.18701	1.3814	4.75686	6.37688	6.29716	5.54259	5.19173	5.55127
OG0001239	Lthed_scf0030.1_g052710.1	Qgl_scf0010.1_g137450.1	AT1G07250.1	AT1G07250.1	II	1.58538	1.67274	1.58663	1.47972	0.713844	1.81408	1.20127	0.967312	1.30445	1.63287	1.4868	2.09565	1.9995	3.17909	1.87777	1.53707	1.4398	1.63722	1.43718	1.42497	0.836803	0.746054	1.08242	0.213226	2.34222	2.08895	2.517	3.12464	2.59281	2.92689	2.15153	2.4811	2.33814	2.17215	1.76389	2.3023	2.36209	2.18649	2.39229	2.78298	2.56213	3.625	3.03197	3.22948
OG0001350	Lthed_scf0100.1_g089310.1	Qgl_scf0100.1_g015310.1	AT4G36690.1	AT4G36690.4	II	6.2967	6.02967	5.39093	5.91185	5.99527	5.87687	6.27164	5.80435	6.1928	6.25811	6.37306	6.66803	6.3275	6.25187	5.89873	5.80246	5.55083	5.58751	5.955	6.0472	5.41589	6.37091	6.01008	6.08831	6.06471	6.00668	6.1094	5.792	6.24947	6.12467	6.06726	6.21811	6.00491	6.02926	6.21889	6.30981	6.4916	6.23182	5.6564	6.37515	6.04732	5.76807	5.82566	6.11958
OG0001376	Lthed_scf0010.1_g040800.1	Qgl_scf0020.1_g039670.1	AT5G15270.3	AT5G15270.3	IV	5.21517	5.54418	4.72216	6.57456	5.28954	4.8144	5.73545	7.31059	7.5734	7.41754	7.52126	6.45204	6.06098	5.57783	5.00628	5.73878	5.26718	5.38244	6.84469	6.4813	7.91157	7.7599	7.73669	8.19743	7.07141	7.05314	6.1871	6.71994	6.43172	5.80309	6.41344	5.91754	5.82868	7.22438	7.95863	8.24923	8.53278	8.37015	7.8396	7.26971	6.42232	6.96444	5.58758	6.36006
OG0001386	Lthed_scf0090.1_g080450.1	Qgl_scf0060.1_g031860.1	AT4G28640.1	AT4G28640.1	IV	4.44271	4.64923	5.26804	4.99171	5.68055	5.20829	4.40323	4.91312	5.62061	5.17807	4.95875	4.38166	4.00844	4.68787	6.08937	5.42058	4.64163	4.38834	4.3563	4.86343	5.24985	5.36589	5.2262	5.99855	5.1279	4.48287	4.30331	4.68265	4.59576	4.43684	4.28779	4.68998	4.92929	5.66835	7.45263	7.21884	7.24212	7.439	5.5599	5.09827	4.31139	4.84036	4.89827	4.67877
OG0001391	Lthed_scf0120.1_g019360.1	Qgl_scf0120.1_g015060.1	AT4G19050.1	AT4G19050.1	I	2.8726	3.48038	3.26938	2.51774	2.99782	3.07603	2.29372	1.40589	1.09999	1.687	2.335	1.47091	3.06202	2.02814	2.67702	3.13518	3.44095	3.16783	2.50663	2.2112	1.16318	1.25422	1.14151	0.743524	2.17824	1.44365	2.51817	1.21143	1.08431	1.24547	0.846322	1.05533	0.931781	0.569003	0.418064	0.110227	0.400191	0.402287	0.690712	0.627568	1.24609	1.41503	1.38063	1.32572
OG0001425	Lthed_scf0030.1_g009600.1	Qgl_scf0010.1_g181670.1	AT1G16290.2	AT1G16290.2	I	3.8647	3.97534	2.93555	3.1612	2.82118	2.55215	2.4801	4.32311	3.24884	1.65841	1.51136	1.89804	2.47733	3.28075	3.21293	2.80893	2.17607	2.90568	3.18471	3.43599	2.82231	2.43138	1.45042	1.92173	1.43743	1.93501	3.76979	1.80105	3.23311	3.24023	2.38297	1.95773	2.93034	1.9795	2.30893	1.3201	0.888826	1.03764	0.897567	1.53686	2.91956	3.2109	2.50052	1.64669
OG0001494	Lthed_scf0050.1_g096970.1	Qgl_scf0040.1_g110330.1	AT1G08830.2	AT1G08830.2	III	10.7266	10.835	11.5012	10.1736	11.1068	11.3927	10.9916	10.5339	10.2895	10.3097	9.80343	9.64127	9.87954	10.6344	11.0811	10.7696	11.6811	11.5373	10.458	10.2031	10.2011	10.2784	9.97105	10.104	10.0107	9.4906	9.60428	10.7049	10.6675	11.0235	10.7248	11.0395	11.1199	10.9944	11.1962	10.9206	10.7897	10.7026	10.6105	10.5979	10.6319	10.4462	10.9369	11.0388
OG0001495	Lthed_scf0060.1_g019080.1	Qgl_scf0090.1_g103470.1	AT3G56860.9	AT3G56860.9	III	7.48504	7.34205	6.86063	7.69055	7.31296	7.13661	7.71381	7.66459	7.87928	7.93001	7.93875	8.06708	7.54347	7.38454	7.34312	7.26743	7.22226	6.91521	7.43243	7.23583	7.34848	7.71205	7.81382	7.68172	7.67117	7.56233	7.29699	7.54765	7.52531	7.42821	7.58846	7.47573	7.1929	7.33621	7.27697	7.65617	7.68054	7.11305	6.64955	7.73786	7.38871	6.86592	6.86372	7.33818
OG0001508	Lthed_scf0050.1_g009710.1	Qgl_scf0040.1_g011970.1	AT2G03060.7	AT2G03060.7	IV	1.27298	1.50885	2.08087	2.24741	1.53744	2.00715	1.4224	1.62956	1.55015	1.40013	1.4648	1.52843	1.63108	1.77934	1.63681	1.9816	1.41507	1.51419	1.54056	1.57713	2.21813	1.91879	1.95029	2.11121	1.69915	2.85175	1.8988	0.909937	0.826598	0.714116	1.2719	0.886511	0.730624	1.14701	1.2597	1.02204	0.995292	1.05544	1.2966	0.983979	1.10495	1.08835	1.03128	1.0353
OG0001510	Lthed_scf0050.1_g041290.1	Qgl_scf0040.1_g048840.1	AT1G11680.1	AT1G11680.1	I	6.49468	6.34863	5.96891	6.52917	6.14443	5.89975	6.17026	5.93779	5.89897	5.34403	5.58194	6.4374	6.69733	6.33448	6.12871	5.94549	5.55097	5.86836	6.07559	6.01356	5.69394	5.84503	5.52013	5.68729	5.5122	6.39617	6.64821	6.39239	6.58899	6.86398	6.40387	6.40316	6.38913	5.72942	5.86129	5.95141	5.91951	6.02563	5.76839	6.82567	6.94666	6.45766	6.15551	6.44789
OG0001545	Lthed_scf0060.1_g065790.1	Qgl_scf0090.1_g053110.1	AT3G46290.1	AT3G46290.1	V	3.51102	3.803	3.57887	4.03923	4.0023	3.90919	3.91215	4.06229	4.2304	4.40345	4.16359	3.56344	3.47351	3.53465	3.83392	4.1021	4.17111	3.98418	4.11088	4.05561	4.24746	4.3341	4.17076	4.66822	4.55013	3.2815	3.45354	3.59288	3.9921	4.59789	4.144	3.9539	4.30295	3.77219	4.955	4.74641	3.88285	4.53473	3.47225	3.89192	3.37385	3.89019	4.13528	4.27975
OG0001546	Lthed_scf0030.1_g159310.1	Qgl_scf0010.1_g002000.1	AT2G44260.1	AT2G44260.1	I	3.23096	3.2271	2.51704	2.74608	2.58254	2.66393	3.55361	2.86987	1.57182	1.17557	1.67553	2.39618	2.8474	3.34608	2.33425	2.43801	1.92284	2.25565	2.57599	2.81794	2.02986	1.50464	0.703939	0.934195	1.19287	1.97397	3.53538	2.88754	3.86041	3.55506	3.93594	3.94573	4.01209	3.23137	1.53214	1.42447	0.58184	1.01565	1.31054	2.54598	3.41776	4.03557	3.62495	3.90879
OG0001571	Lthed_scf0070.1_g089930.1	Qgl_scf0080.1_g083430.1	AT2G31560.3	AT2G31560.3	I	8.08106	8.03389	7.84207	7.64474	8.04155	7.90029	7.68051	7.21171	6.8771	6.4867	6.61116	7.0875	8.10694	7.44722	7.92502	7.87807	7.3787	7.77596	7.53681	7.42068	7.00527	6.16147	6.58194	7.17427	6.60853	6.853	7.84201	7.66218	7.81251	7.49695	7.61017	7.85912	7.48823	7.08095	7.30794	7.32675	7.71536	7.59238	6.22619	7.21613	7.76945	7.51711	7.45057	7.69418
OG0001581	Lthed_scf0090.1_g073620.1	Qgl_scf0060.1_g038440.1	AT3G23230.1	AT3G23230.1	V	0	0	0	0.48935	0.358455	1.08092	0	0.354573	1.89906	0	0.657378	0.86592	0.108299	0.963876	0.672635	0.844499	0.124147	0	0.955334	1.06028	1.58735	2.09759	1.0967	2.11584	1.24891	0.788814	0.534036	0.673511	0.610558	0.792973	0.62858	1.03064	0.615037	0.788739	1.19044	2.08079	1.80375	1.1201	0	0.472597	0	1.25769	0.973887	2.27161
OG0001586	Lthed_scf0020.1_g026280.1	Qgl_scf0030.1_g161760.1	AT4G33000.2	AT4G33000.2	II	2.69788	2.95073	3.62711	2.66323	3.2289	2.71001	2.00168	2.62254	2.57368	2.82986	2.48628	1.90517	1.91484	4.14908	3.88447	2.54038	2.74666	2.39513	2.26288	2.32196	1.94013	2.3154	2.70375	2.37205	3.69913	2.63098	2.71027	2.89948	2.90389	2.81681	2.8326	2.94548	2.69881	2.30278	2.03571	1.56729	2.4462	2.10866	3.48076	3.55489	2.73439	3.45828	4.20146	4.01801
OG0001587	Lthed_scf0020.1_g056340.1	Qgl_scf0030.1_g123710.1	AT5G25360.3	AT5G25360.3	V	4.29747	4.2413	4.32035	4.38717	4.12132	3.9199	4.24708	3.61376	4.28088	4.81693	4.96595	4.68973	4.27585	4.73356	4.46389	4.21288	4.54722	3.91116	4.21313	4.17331	4.02885	4.20244	4.72071	4.58312	4.60381	4.11305	4.37483	4.30015	4.71724	4.64659	4.80959	4.8142	5.01711	4.68094	4.71659	4.49262	4.53852	3.84982	4.55065	4.40328	4.60922	4.42385	5.07703	4.7857
OG0001617	Lthed_scf0080.1_g102650.1	Qgl_scf0070.1_g009680.1	AT5G37850.4	AT5G37850.4	IV	2.27551	2.94377	2.4094	2.71546	2.21493	2.91329	2.76346	4.97906	5.34334	4.35016	3.47395	3.50078	2.80445	2.56184	2.39202	2.52883	2.42737	1.96129	3.24121	3.26113	5.0578	5.0133	4.9159	5.60023	3.93868	3.34554	2.83542	3.31929	2.90918	3.24614	3.35412	3.33924	3.26597	4.81067	5.30394	5.61193	5.36396	4.38294	3.92204	3.53874	2.94147	3.19247	3.21218	3.33759
OG0001622	Lthed_scf0070.1_g084040.1	Qgl_scf0080.1_g074700.1	AT5G63970.2	AT5G63970.2	V	5.09571	5.03719	4.76765	5.29694	5.12053	4.6744	4.58312	5.11996	4.98477	4.9021	4.40839	4.92248	5.46523	4.98638	5.03065	4.89654	5.05034	4.96276	4.98301	4.74166	4.52193	4.66874	4.43208	4.95863	5.07346	4.95404	5.23893	4.93239	4.71105	4.61297	4.41602	4.38204	4.07133	4.29023	4.30291	3.89429	2.77552	2.83436	4.53569	4.98093	5.00799	5.18633	4.71829	4.85551
OG0001623	Lthed_scf0040.1_g063040.1	Qgl_scf0050.1_g071160.1	AT4G27130.1	AT4G27130.1	IV	6.13251	6.62313	7.35637	6.50647	7.2672	6.85104	6.79508	6.85588	6.83297	7.32381	7.02122	5.18943	5.76237	6.9631	6.90038	6.88582	7.52159	6.9753	6.36701	6.16669	6.63543	7.12085	7.2755	7.65098	6.893	5.56583	5.92688	7.47827	6.79542	6.5075	6.94648	6.838	6.85074	7.03904	7.81358	7.77049	8.01533	7.7426	7.59161	7.63825	6.94393	6.84765	7.25743	7.08076
OG0001630	Lthed_scf0010.1_g084210.1	Qgl_scf0020.1_g081220.1	AT5G12080.3	AT5G12080.3	III	1.346	1.07174	0.605979	1.2469	0.677436	1.25433	1.68855	1.69168	2.31315	2.2215	2.16709	2.87946	1.16404	0.415015	0.783332	1.62944	0.781788	1.14498	1.90032	1.85958	2.36267	2.48906	2.22223	2.22419	2.15941	2.86747	1.00295	1.61089	1.32078	1.85641	1.56179	1.37012	1.34714	1.54692	2.76308	2.77424	3.06537	3.14068	2.46587	1.54817	0.912546	1.31278	1.40807	1.30218
OG0001635	Lthed_scf0120.1_g008190.1	Qgl_scf0120.1_g006780.1	AT1G32330.1	AT1G32330.1	I	4.92192	4.72299	5.57287	3.93016	4.92212	5.28208	4.91856	3.66395	3.7213	4.36755	3.92342	4.20811	4.29573	4.65355	4.98386	4.98937	5.78191	5.3943	4.00362	4.20091	3.64649	3.75644	4.32065	4.21374	3.9706	3.79052	4.15996	4.07678	4.25358	4.54006	4.61031	4.57359	4.86722	4.04873	3.40928	3.76628	4.02796	4.08209	3.52833	3.46203	4.28391	3.99141	4.89162	4.61446
OG0001642	Lthed_scf0040.1_g076480.1	Qgl_scf0050.1_g059070.1	AT1G53210.1	AT1G53210.1	III	5.12994	4.94441	4.77536	4.98531	5.17762	4.58992	4.76237	5.24032	5.75421	4.58883	4.22362	4.69704	4.45149	4.39122	4.8325	4.30843	4.02487	3.66144	4.02201	4.05669	4.65499	4.66797	4.74569	6.49149	3.79248	3.98245	4.43491	4.05376	3.80647	3.69542	4.10474	3.93085	3.92708	4.25194	5.25416	5.01462	3.6021	4.42621	3.25624	4.06373	4.10997	3.68337	3.43263	3.64741
OG0001662	Lthed_scf0010.1_g200290.1	Qgl_scf0020.1_g193790.1	AT5G12020.1	AT5G12020.1	III	10.5128	8.42411	13.0085	6.18463	8.37456	11.4643	4.50743	3.47799	5.57117	6.19215	5.87283	7.31187	3.72221	8.3583	10.0798	6.32646	11.418	11.6403	3.04358	4.50537	3.5601	5.70646	6.24859	7.43687	6.64902	4.65187	3.90342	5.10116	2.70875	9.9173	3.46306	5.10545	5.232	3.18088	6.78043	7.11479	7.55081	7.83307	4.22551	3.11219	3.14172	1.76828	6.55627	2.98823
OG0001683	Lthed_scf0110.1_g009510.1	Qgl_scf0110.1_g076600.1	AT5G46100.1	AT5G46100.1	II	0.804801	0.866681	0.731117	1.12309	0.678511	1.93712	1.12802	1.57325	1.13701	1.22685	1.28546	1.5121	1.01469	0.743458	0.416518	0.853641	1.08004	0.856281	1.31263	1.21874	1.46908	1.46276	1.06981	1.54696	1.56836	1.54421	0.957581	1.27738	0.936554	1.23767	0.956881	1.02407	0.659335	1.36162	1.38527	1.53791	0.960205	1.4896	1.52792	1.73361	0.832433	1.29145	0.864837	0.937168
OG0001696	Lthed_scf0030.1_g015070.1	Qgl_scf0010.1_g178070.1	AT1G20140.1	AT1G20140.1	III	6.18429	6.29662	6.1955	5.84745	6.09386	6.22387	6.61094	6.94444	7.40427	7.12508	6.84894	7.65122	6.0644	4.84775	5.71062	5.81764	5.61839	5.75126	5.80226	5.72131	5.95247	6.51504	6.23382	7.26089	5.76514	6.37668	5.75528	6.56403	6.21986	6.26306	6.35297	5.91811	5.96987	6.06976	6.80375	7.85718	7.96399	7.59476	5.70743	6.41507	6.15465	6.02006	5.66165	6.17628
OG0001697	Lthed_scf0090.1_g017320.1	Qgl_scf0060.1_g097680.1	AT3G49170.1	AT3G49170.1	V	1.04453	1.67238	1.32698	1.49578	1.25867	1.43825	1.56452	1.16754	1.3114	1.42586	1.24878	1.73141	1.07792	0.351313	0.842304	1.05681	0.927721	1.02525	1.04565	0.901521	1.15924	1.04958	0.983983	0.845174	1.01952	1.39162	0.716341	1.03991	0.809357	0.97212	0.871024	0.954782	0.943812	0.94463	0.933593	0.491619	0.551626	0.67579	0.88889	0.863188	0.896625	0.759613	0.908471	0.875594
OG0001703	Lthed_scf0040.1_g128550.1	Qgl_scf0050.1_g011700.1	AT3G13170.1	AT3G13170.1	V	0.904938	0.692317	1.24819	0.526377	1.50631	1.53768	1.48872	1.46712	0.648866	0.842496	1.32122	2.19636	0.8624	1.38442	0.550289	0.750397	0.686451	0.674064	0.925005	1.1833	0.642312	0.79197	1.32476	0.70302	1.11339	1.37059	0.72359	0.523172	0.599461	0.30655	0.714753	0.768563	0.549789	1.11325	0.889712	0.872495	0.566917	0.869042	0.898649	0.963135	0.748315	0.464123	0.94787	0.776671
OG0001717	Lthed_scf0010.1_g143810.1	Qgl_scf0020.1_g133750.1	NA	NA	IV	3.69707	5.54503	5.22782	4.43613	5.30623	5.43241	5.54819	5.3353	5.47973	4.49085	4.35191	3.99822	3.08101	5.31829	5.75138	2.45507	3.60423	2.87978	2.63977	2.47469	3.39905	4.07168	4.63301	4.06512	3.11486	3.85348	3.66909	2.77559	3.18221	0.662393	0.708054	1.2253	2.37223	3.58048	2.92995	3.63527	4.33708	4.30053	3.32857	2.3366	3.51502	1.03752	0.90206	1.5634
OG0001738	Lthed_scf0040.1_g057700.1	Qgl_scf0050.1_g076440.1	AT1G03940.1	AT1G03940.1	I	6.55225	6.3213	5.60784	5.50254	5.35191	5.40255	5.01378	4.10456	3.07729	2.72294	2.1915	3.2798	5.80954	5.08978	4.25961	5.62376	5.31201	5.84161	5.36207	5.45893	3.8785	2.89957	2.26751	2.22118	3.49289	3.71658	6.58684	3.85966	5.21773	5.06943	5.05944	4.93694	5.45603	3.57084	2.86653	0.916939	1.27148	0.822636	3.07346	4.07132	6.34144	5.87373	4.95343	4.67515
OG0001750	Lthed_scf0070.1_g090650.1	Qgl_scf0080.1_g084070.1	NA	NA	V	0	0	0	0	0	0	0	2.61645	0	0	0	0	1.19937	0	0	0	0	0	0	0.845875	0	0.848783	1.82756	2.02014	0	0.846194	1.94692	0	0.935766	0	0	0	0	0	1.40363	0	0	0	1.40974	1.05179	1.01644	0	0	0
OG0001800	Lthed_scf0110.1_g011970.1	Qgl_scf0110.1_g074400.1	AT2G41430.5	AT2G41430.5	I	8.70312	9.29547	9.49077	9.58376	9.73921	9.3593	8.39063	8.07608	8.29115	7.93171	8.13862	7.9839	8.78107	9.52924	9.95606	9.37161	9.04553	8.78806	8.37585	8.33708	7.70419	7.94496	8.08844	8.65794	7.72956	7.93157	8.7596	9.30783	8.83965	8.76395	8.49578	8.59619	8.33853	8.17489	8.57808	8.91617	8.66199	9.27274	8.1067	8.40884	8.8421	8.52114	8.95542	8.84577
OG0001805	Lthed_scf0050.1_g011430.1	Qgl_scf0040.1_g012420.1	AT2G02960.6	AT2G02960.6	IV	5.64429	6.08214	6.5991	6.78794	7.26346	6.53805	5.4088	5.81024	6.76309	6.13783	6.00458	5.55937	5.63338	6.94105	7.85349	6.71296	5.92444	5.2872	5.36765	5.44731	5.73733	5.84706	5.99604	6.67993	6.03003	5.2319	5.6276	6.35622	5.52078	5.42994	5.48132	5.33917	4.84268	5.56989	6.97831	7.27667	6.375	6.73465	5.49456	5.30999	5.16383	5.4802	5.84189	5.41371
OG0001815	Lthed_scf0080.1_g019260.1	Qgl_scf0070.1_g094490.1	AT2G21470.1	AT2G21470.1	III	5.26954	5.31901	4.80633	5.63986	5.03423	4.85723	5.05832	5.72593	6.08321	6.02537	5.65991	5.52918	5.50217	5.29716	5.2676	5.47819	4.94038	4.89135	5.52949	5.50333	5.66915	5.84609	6.19327	6.1483	5.83377	5.80018	5.44419	5.6017	5.376	5.47279	5.47238	5.41115	5.17957	5.63046	6.05687	6.2906	6.50349	6.11774	5.92288	5.46111	5.50375	5.57922	5.73457	5.56487
OG0001849	Lthed_scf0030.1_g091900.1	Qgl_scf0010.1_g090920.1	AT3G20970.1	AT3G20970.1	IV	4.7321	4.95065	4.83633	4.96673	4.8643	4.37754	5.16133	5.93763	5.90414	6.11516	5.97798	5.30287	4.95059	5.2383	5.23911	5.24211	5.08648	5.0219	5.27169	5.42114	5.95312	6.19752	6.33705	6.44249	5.93908	5.41763	5.04962	5.3602	5.12946	4.67454	5.14155	4.99552	5.02152	5.62393	5.98043	6.18558	6.34376	6.19633	5.65421	5.48015	4.97661	5.27843	4.8517	4.98185
OG0001859	Lthed_scf0060.1_g075650.1	Qgl_scf0090.1_g043360.1	AT1G07120.1	AT1G07120.1	I	3.13734	3.11243	3.14842	2.69531	2.52446	2.48313	2.32465	2.70779	1.4516	0.984695	0.692563	0.827063	1.53733	2.70911	2.16949	3.17963	2.83692	2.73355	2.58346	2.82257	2.1326	1.80392	0.948793	1.26305	1.01836	0.728992	2.96292	2.00479	2.76442	3.07204	2.20103	2.13203	2.2606	1.64416	1.90939	1.05327	0.87535	1.34982	1.1021	1.20287	2.5817	3.06447	2.45637	1.94568
OG0001861	Lthed_scf0060.1_g053100.1	Qgl_scf0090.1_g067220.1	AT1G07350.3	AT1G07350.1	III	8.21246	7.42705	8.22567	5.80923	8.24403	8.3812	6.85232	5.26685	6.05252	6.72219	6.15046	6.44627	6.10555	7.66081	7.96733	7.35941	8.53265	8.14583	4.95248	5.51953	4.98933	5.74085	6.30927	6.16657	6.03864	4.55197	5.53246	5.23244	4.57403	4.26678	5.51804	5.30645	5.74447	4.41548	4.59489	5.02421	5.40347	4.40406	3.98296	3.43674	4.22435	3.63698	5.47929	5.4029
OG0001908	Lthed_scf0100.1_g045160.1	Qgl_scf0100.1_g059140.1	AT3G07040.1	AT3G07040.1	IV	1.22905	0.823716	1.40234	1.43959	1.35267	0.974062	0.710095	1.09	1.23455	1.68515	1.56727	0.604296	0.190554	0.934068	0.798417	1.71702	1.93698	1.65595	0.957189	1.17091	1.06742	1.61069	1.989	1.94548	1.84347	1.03834	0.24193	0.664504	0.718996	1.15185	0.882621	0.975652	0.936973	0.732585	0.922399	1.06399	1.58217	0.90584	0.963113	0.818739	0.348568	1.08828	1.2927	1.93024
OG0001909	Lthed_scf0080.1_g007280.1	Qgl_scf0070.1_g109430.1	AT5G23590.2	AT5G23590.2	III	3.33536	2.41715	3.10261	3.58257	2.8458	3.13549	3.12238	3.21479	3.94486	4.1755	3.82449	3.15425	3.20674	3.11	3.38876	3.28806	3.34027	3.15515	2.95852	3.48564	3.9975	3.99212	4.58833	4.28122	4.02058	3.66518	2.97752	2.93345	2.93642	3.10283	3.29295	3.13259	3.00899	3.67342	3.83324	4.16386	4.13672	4.31492	3.43127	3.44187	2.91462	3.18529	3.02608	3.50977
OG0001912	Lthed_scf0100.1_g012980.1	Qgl_scf0100.1_g092060.1	NA	NA	III	6.54445	4.91738	4.77191	4.03893	4.04067	4.09863	4.36934	4.18357	4.75476	5.58342	5.42502	5.57119	5.52667	3.55969	4.75674	4.50397	4.44936	4.59738	3.7642	3.55116	3.64086	4.56443	4.33413	3.58836	3.80948	4.94132	6.7473	1.37901	1.86503	1.713	1.03949	0.574502	0.417612	1.12441	0.393506	1.09758	2.08218	1.53149	0.914375	1.71657	0.783126	1.49014	0.598935	0.118676
OG0001917	Lthed_scf0020.1_g004290.1	Qgl_scf0030.1_g186100.1	AT3G16770.1	AT1G53910.3	I	9.63482	9.50237	9.60759	9.87728	9.74963	9.52001	9.1687	9.37249	9.45545	9.54254	9.25148	8.99721	9.16089	9.63138	10.1304	9.87543	9.85012	9.6151	9.21241	9.1732	9.58391	9.57999	9.54255	10.1695	9.38821	9.5687	9.42056	9.55816	9.53923	9.53728	9.31092	9.25235	9.11541	8.97006	9.43486	9.61078	9.70251	9.3538	8.94521	9.56412	9.42584	9.38918	9.59564	9.65404
OG0001928	Lthed_scf0050.1_g097230.1	Qgl_scf0040.1_g112640.1	AT3G05000.1	AT3G05000.1	V	5.89978	5.99681	5.05002	6.33008	5.63085	5.67825	6.49185	6.82298	7.07405	6.77402	6.83042	6.82189	6.44513	6.24562	6.21274	6.1505	5.9193	6.09094	6.45965	6.58093	6.65933	6.84508	7.04931	6.86726	6.75657	6.87035	6.37931	7.12305	6.8895	6.47668	6.69439	6.62025	6.72547	6.93864	7.06891	7.46265	7.51054	7.37966	7.03279	7.16686	6.75027	6.64347	6.35053	6.58505
OG0001941	Lthed_scf0070.1_g031870.1	Qgl_scf0080.1_g025970.1	AT3G03305.1	AT3G03305.1	I	3.32817	3.27162	3.34887	3.32534	2.99657	3.37269	3.29822	3.84014	3.7634	3.60477	3.77923	3.70143	3.55648	3.30894	3.09701	3.36187	3.31945	3.64612	3.58935	3.50118	3.81337	3.71086	3.73221	4.11247	3.75936	3.86741	3.41698	3.98242	3.93534	4.07604	4.24896	3.91469	4.34715	4.02412	4.28227	4.35319	4.6247	4.82015	4.27302	3.94081	3.86266	3.86308	3.98656	3.71885
OG0001951	Lthed_scf0090.1_g051640.1	Qgl_scf0060.1_g062500.1	AT5G51180.2	AT5G51180.2	V	4.15252	3.72987	3.86945	4.10145	3.80441	3.90449	4.15707	4.63402	4.85517	4.35446	4.23183	4.65422	4.75684	4.38984	4.04633	3.62611	3.62517	3.60537	4.14783	4.32233	4.42066	4.66766	4.44731	5.32885	3.99012	4.52135	4.51749	4.19505	4.07369	3.92226	3.91292	3.84633	3.81231	4.45045	5.3732	5.50523	4.77925	5.04432	4.33948	4.2028	4.46251	4.17201	3.71327	3.35768
OG0001952	Lthed_scf0080.1_g100840.1	Qgl_scf0070.1_g011480.1	AT3G11710.1	AT3G11710.1	III	5.13196	5.55871	5.51216	5.33611	5.59709	5.5047	5.08405	4.45241	4.35368	4.54917	4.17439	3.89474	4.3484	5.05615	4.86088	5.37702	5.57771	5.2909	5.09737	4.63059	4.58007	4.14774	4.37224	4.09947	3.88984	3.42899	4.32026	6.62435	6.36121	6.41543	6.58411	6.38693	6.47614	6.74546	7.2061	7.21926	7.12985	7.08153	7.07243	6.84508	6.40337	6.34207	6.23212	6.39599
OG0001956	Lthed_scf0030.1_g123180.1	Qgl_scf0010.1_g053360.1	AT4G30800.1	AT4G30800.1	III	5.28292	4.02962	4.30543	5.0798	3.9906	4.17233	5.29143	5.17054	5.84113	5.55935	5.90333	6.70986	5.399	5.15836	4.21203	4.36145	4.01972	4.6425	5.14787	5.47637	6.19781	6.09769	5.78637	5.9117	5.62219	6.69904	5.48825	5.68831	5.65531	5.66923	5.84633	5.64638	5.83754	6.33997	6.32205	6.02806	5.89293	6.31746	6.58232	6.79424	6.05633	5.58041	5.49314	5.02454
OG0001980	Lthed_scf0010.1_g033890.1	Qgl_scf0020.1_g032250.1	AT3G57340.2	AT3G57340.2	IV	5.94318	6.15157	5.89133	6.12413	5.85582	5.88312	5.79476	6.3586	6.82509	6.697	6.6223	5.85693	5.74371	5.6078	6.03931	5.8948	5.82956	5.72586	5.92281	5.95159	6.44769	6.76655	6.77774	7.10769	6.26576	5.69086	5.95974	5.90073	5.98321	5.90976	6.25504	5.99478	6.11331	6.32825	6.74545	7.19912	6.98922	6.7377	5.72972	6.00823	5.69688	5.73198	5.85884	5.98662
OG0001981	Lthed_scf0010.1_g028930.1	Qgl_scf0020.1_g028560.1	AT2G10950.3	AT2G10950.3	III	4.46537	4.49453	4.72904	4.20232	4.49852	4.38463	4.26217	3.84942	3.55706	3.31355	3.64867	3.95523	4.46824	4.50415	4.61677	4.36736	4.30109	4.43996	3.85821	3.78683	3.31061	3.30033	3.37183	3.45727	3.16643	3.67192	4.2865	3.78891	3.98214	3.7732	3.73297	3.74083	3.4687	3.29255	2.29029	2.42504	2.81343	2.90634	3.14612	3.50457	3.83396	3.76775	4.09083	3.79481
OG0001988	Lthed_scf0010.1_g152340.1	Qgl_scf0020.1_g142500.1	AT1G76890.2	AT1G76890.2	III	3.31184	3.23622	3.28914	3.27033	3.00891	3.13092	2.98637	4.2849	4.2466	4.7162	4.32185	3.36366	4.22363	3.26878	3.64729	3.28227	3.11158	3.26014	3.60269	3.39345	4.7273	4.58186	4.55399	5.53387	4.77818	3.98342	3.88015	2.92801	3.12232	2.92543	2.8893	2.80495	3.08928	3.26065	5.01315	4.72802	4.02922	4.15316	3.74973	3.97285	3.08876	3.35813	2.54489	2.67606
OG0001992	Lthed_scf0120.1_g026670.1	Qgl_scf0120.1_g022930.1	AT1G62870.1	AT1G62870.1	I	4.08172	4.58645	4.20549	4.23348	4.16803	4.35386	3.99439	3.98601	3.26054	2.84458	2.83876	3.33427	5.02	4.41976	4.22747	4.54045	4.09451	4.4937	4.57327	4.04795	4.32548	3.32351	2.77521	1.91104	3.62552	3.53877	4.70528	4.23387	4.70421	4.60918	4.51873	4.47551	4.48972	4.37406	3.25132	2.34874	1.73172	2.3812	3.22697	4.4026	4.88518	4.88993	4.34716	4.37836
OG0001994	Lthed_scf0010.1_g024860.1	Qgl_scf0020.1_g024010.1	AT3G14850.2	AT3G14850.2	I	3.02635	2.85551	2.36042	3.51008	2.49084	2.95271	4.29336	4.07106	2.68931	2.37298	2.22074	4.16691	4.05785	2.80685	2.29517	2.73942	2.02573	3.32164	3.36512	3.69581	3.32604	2.43927	1.47332	1.57885	1.94142	4.01156	3.84633	3.42311	3.67179	3.9461	2.96567	3.76984	3.66446	3.27589	1.65883	0.534653	0.598218	0.415205	1.95371	3.72788	3.77105	2.9747	2.43175	2.98461
OG0002014	Lthed_scf0070.1_g100170.1	Qgl_scf0080.1_g097250.1	AT3G52050.2	AT3G52050.2	II	3.61541	3.90169	3.84556	3.85826	3.90669	4.06982	3.61799	3.71557	3.15707	3.32869	3.39489	4.28266	4.02226	3.7308	3.73788	4.05775	4.05576	3.82752	3.8299	3.76964	3.97433	3.80497	3.73437	4.10719	3.88414	4.12305	3.86247	3.79274	3.86671	3.90061	3.83313	3.73496	3.78874	3.69654	3.58597	3.479	3.42374	3.30741	4.00511	4.14581	4.2009	3.85923	4.03874	3.85063
OG0002034	Lthed_scf0060.1_g014580.1	Qgl_scf0090.1_g107250.1	NA	NA	V	1.29852	1.60104	1.04649	0.908215	1.13152	0.520226	0.597577	0.638835	0.83005	0.508275	0.592646	0.680819	2.02933	1.21107	0.856907	1.04273	0.731493	1.66184	1.66839	1.43005	1.53903	0.88672	1.45936	1.33444	1.25983	1.74088	1.79048	3.29139	2.81505	2.95779	2.0849	1.85263	1.92292	1.12196	2.04033	1.99901	1.79675	1.22515	1.40705	1.49352	2.69677	2.30767	2.17951	2.68636
OG0002036	Lthed_scf0110.1_g096950.1	Qgl_scf0110.1_g003020.1	AT3G53630.1	AT3G53630.1	IV	5.57167	5.50634	6.3578	5.80416	5.94535	6.11815	5.70932	6.07676	6.26097	6.49781	5.9546	6.00229	5.27476	5.63532	6.05362	5.54206	6.28936	5.82781	5.37984	5.57747	5.90913	6.21263	6.71347	6.58448	5.75396	5.70145	5.33034	5.75851	5.1679	5.62752	5.69048	5.76751	5.96453	6.06614	6.42971	6.37068	6.11445	5.94901	5.83458	5.86562	5.41414	5.3865	5.73217	5.5319
OG0002053	Lthed_scf0020.1_g112390.1	Qgl_scf0030.1_g066800.1	AT1G17020.1	AT1G17020.1	III	2.21103	1.17564	0.712809	1.64866	0.417935	1.33808	2.63954	4.04432	4.3449	4.89217	5.02429	3.97424	2.03744	1.9395	0.934578	0.748875	0.815488	0.663872	2.32743	2.80901	3.45475	3.51817	4.75777	4.40864	4.37536	3.05977	1.86493	4.44965	3.55986	3.24166	2.77214	2.83539	2.63142	2.59596	2.74393	3.2307	2.99983	2.99198	3.71099	3.71556	2.33739	2.5646	3.14946	3.69405
OG0002067	Lthed_scf0010.1_g058620.1	Qgl_scf0020.1_g058610.1	AT5G14420.4	AT5G14420.4	IV	4.4092	4.19657	3.85959	4.37465	4.19202	4.1137	4.37909	5.58839	5.98841	5.82709	5.02022	4.40238	4.78755	4.23002	4.38177	4.1655	3.95028	3.93658	4.4059	4.36243	5.74589	5.77526	5.69697	6.52359	5.24918	5.23979	4.74867	4.48266	4.51967	4.34504	4.56713	4.64469	4.22687	5.4048	6.23163	6.71749	6.0883	5.90566	5.03762	5.0347	4.66994	4.94815	4.49192	4.89599
OG0002071	Lthed_scf0040.1_g061200.1	Qgl_scf0050.1_g073390.1	AT3G25830.1	AT3G25830.1	I	2.40369	2.29089	2.61938	2.24441	2.12427	2.26107	2.33111	2.66328	2.08029	1.9792	2.11746	2.03665	2.28236	1.2822	2.74839	2.60897	2.88598	3.12884	2.85335	2.43424	2.42896	2.46187	1.85865	1.64999	2.08982	1.70677	2.56562	2.55287	2.72842	2.75493	2.59251	2.75871	2.03315	2.42388	2.51541	2.12597	1.32256	2.05955	2.52756	2.16957	2.5357	3.03834	3.12614	3.21232
OG0002198	Lthed_scf0060.1_g019200.1	Qgl_scf0090.1_g103140.1	AT5G21105.1	AT5G21105.1	II	1.63142	2.04215	2.01007	1.70421	1.46926	0.982944	2.02813	1.4072	0.954619	1.15296	1.25485	2.30039	2.65238	2.62866	2.21583	0.888065	0.687454	1.07165	1.16756	1.24321	0.879108	0.783273	0.701077	0.957777	1.27967	2.99508	2.89471	2.89888	2.64666	2.2004	1.9912	2.77701	3.17082	2.39567	2.79116	2.32973	1.9096	2.15062	3.54751	3.35807	3.12288	2.00136	2.50996	2.22226
OG0002201	Lthed_scf0080.1_g002800.1	Qgl_scf0070.1_g114030.1	AT3G12500.1	AT3G12500.1	V	5.19548	6.29776	6.87465	7.00944	6.31533	5.77599	5.51813	6.80974	7.07043	6.83669	6.54022	6.17464	5.65463	5.88596	7.18181	5.69587	6.4511	5.51286	5.24432	6.15228	6.4331	7.46722	8.65485	8.40439	6.9303	7.02961	6.5839	7.08249	5.70275	7.20885	6.01352	6.50243	6.6601	5.93193	7.6051	8.16568	8.66449	7.50898	7.51077	6.89017	6.85198	6.25703	6.70631	6.69839
OG0002202	Lthed_scf0090.1_g021860.1	Qgl_scf0060.1_g091420.1	AT1G51160.3	AT1G51160.3	III	4.8198	4.33105	4.51398	4.35892	4.65031	3.88838	4.45657	4.30384	4.66507	4.09386	4.08092	5.1525	4.93038	4.39042	4.51704	4.62789	4.35833	4.51089	4.5952	4.64436	4.61535	4.41363	4.33529	4.24908	4.17944	4.87151	4.63029	4.81442	4.96734	5.1232	5.07634	4.91089	4.85218	4.60253	4.538	4.86811	4.75359	5.0839	4.70101	4.82096	4.96062	4.74104	4.92953	4.60142
OG0002208	Lthed_scf0090.1_g066410.1	Qgl_scf0060.1_g045340.1	AT1G77670.1	AT1G77670.1	II	6.16041	5.62614	5.67421	5.70626	5.76467	5.61409	5.74254	5.17687	5.41791	5.34688	5.48909	6.10492	5.69753	5.9172	5.73429	5.54314	5.49778	5.78437	5.55147	5.65531	4.92714	5.23858	4.83637	4.52657	5.55931	5.91521	5.86714	6.0194	6.02326	6.08746	5.94809	5.92913	6.01365	5.83799	5.68746	5.67442	5.93551	6.12421	6.06776	6.32047	6.09119	5.84565	6.25489	5.93268
OG0002209	Lthed_scf0090.1_g045110.1	Qgl_scf0060.1_g068550.1	AT5G03415.1	AT5G03415.1	V	1.95618	4.47531	1.39712	5.15975	4.18995	4.5571	4.39532	3.05626	5.2833	4.93304	5.17965	4.00604	4.93073	4.3078	4.5134	4.63355	3.80778	4.33192	5.22773	5.00519	5.19165	5.51633	5.13981	5.41063	5.2582	4.92088	4.94369	4.63579	5.37824	4.15907	5.36173	5.23421	4.71384	5.02438	4.64455	5.19205	5.02394	4.44726	4.37203	4.90274	4.36564	4.32281	4.08493	4.95355
OG0002214	Lthed_scf0050.1_g068700.1	Qgl_scf0040.1_g074220.1	AT1G16020.1	AT1G16020.1	V	5.2132	5.10057	5.2129	5.27581	5.0653	5.14396	5.10615	5.77007	5.77671	5.76285	5.24456	4.88193	4.98287	5.045	5.14876	5.16872	5.1911	5.1665	5.1099	5.3416	5.78369	6.06853	6.02173	6.16512	5.62267	5.2484	5.08681	5.42495	5.38543	5.22737	5.48177	5.56074	5.63612	6.23341	6.50452	6.32302	5.99729	5.59179	5.77194	5.39209	5.35675	5.54499	5.39433	5.53553
OG0002216	Lthed_scf0050.1_g049060.1	Qgl_scf0040.1_g054150.1	AT5G23150.2	AT5G23150.3	IV	3.78438	4.06205	3.65042	3.86735	3.69373	3.99009	4.06492	4.68111	4.56383	4.91723	4.60338	4.09787	4.07073	4.06117	3.96648	4.0993	4.27871	4.04227	4.30892	4.2343	4.97725	4.88798	5.15245	5.24077	4.71708	4.3672	3.86299	4.36719	4.30466	4.18356	4.4825	4.26523	4.21403	4.5533	5.02994	4.99235	5.14075	4.84346	4.87683	4.54466	4.13216	4.45581	4.07206	4.12285
OG0002225	Lthed_scf0080.1_g017420.1	Qgl_scf0070.1_g096800.1	AT1G75560.2	AT1G75560.2	III	5.5094	4.82585	5.28791	4.8444	4.87028	5.26281	5.00133	4.65405	5.3129	5.45215	5.63862	5.91989	5.17178	5.16437	4.95771	4.90056	5.11772	5.30582	5.18263	5.41241	4.94708	5.80526	5.74648	5.38227	5.74281	5.84243	5.52147	5.32098	5.65777	5.66977	5.71209	5.68266	5.59063	5.81666	5.9599	5.87769	5.88577	5.54537	5.05471	5.82321	5.85515	5.52849	5.31515	5.35761
OG0002230	Lthed_scf0010.1_g002010.1	Qgl_scf0020.1_g002810.1	AT5G49840.1	AT5G49840.1	II	3.09535	3.17095	3.20622	3.07063	2.91229	3.06808	3.15128	3.57253	3.47942	3.58661	3.3997	3.3869	2.70309	2.98823	2.48595	2.47295	2.49326	2.55169	2.88223	2.67104	2.64449	2.7437	2.71828	2.34704	2.61126	2.7212	2.59521	2.38707	2.42984	2.60592	2.55485	2.52794	2.36484	2.58043	2.392	2.09841	2.15007	2.42949	2.47799	2.30448	2.73814	2.61597	2.67141	2.38022
OG0002233	Lthed_scf0080.1_g035520.1	Qgl_scf0070.1_g074510.1	AT4G34131.1	AT4G34131.1	V	1.61478	1.92101	1.2309	2.33504	1.57546	1.18427	1.08658	1.47622	2.39368	1.96624	2.04627	0.744418	0.994331	1.32351	1.77598	2.22311	1.55467	2.01295	1.98917	2.00385	1.69825	1.75025	2.57608	2.37256	2.28829	1.40848	1.48552	2.08438	2.01763	2.45678	2.46978	2.00194	1.95221	2.07416	1.23472	0.998779	2.26314	1.34302	1.83146	1.34583	1.04986	2.25692	2.33818	2.88623
OG0002243	Lthed_scf0010.1_g192490.1	Qgl_scf0020.1_g186970.1	AT4G02630.1	AT4G02630.1	I	4.72624	4.70669	4.72101	4.84237	4.71931	4.61394	4.50295	4.1919	3.66853	4.24755	4.80003	4.68827	4.49097	4.65135	4.18451	4.78631	4.54206	4.6584	4.81357	4.39708	4.63535	4.20432	3.92786	3.55709	4.64375	4.46846	4.37543	5.43848	5.2854	5.04255	5.04969	5.07923	4.56977	5.01843	5.09501	5.18778	4.86726	5.21892	4.92123	5.46735	4.95131	5.06509	4.98911	5.08806
OG0002245	Lthed_scf0070.1_g056240.1	Qgl_scf0080.1_g049290.1	AT3G18000.1	AT3G18000.1	I	5.82688	5.59762	5.9829	7.1672	6.5984	6.86228	8.18545	6.645	5.61745	4.51403	5.69394	7.91075	6.34724	5.30064	4.49224	5.51085	5.48206	6.0487	8.51561	7.66378	6.96775	5.58555	3.95252	4.43925	6.58304	7.57547	6.04888	5.11413	5.92164	5.68256	5.41779	5.20586	5.88196	6.09265	4.40914	4.14998	2.72751	2.50039	3.50407	6.92444	6.35324	3.58525	3.02525	3.31325
OG0002246	Lthed_scf0070.1_g061220.1	Qgl_scf0080.1_g053440.1	AT3G17810.1	AT3G17810.1	IV	5.73699	5.267	5.49827	5.40641	5.492	5.51905	5.10887	5.42734	5.81296	5.65012	5.08023	4.54397	5.41005	5.45645	5.5317	5.51955	5.84266	5.90123	5.05652	5.3712	5.28588	5.80686	5.80124	6.16679	5.11712	5.00596	5.46196	5.12399	5.54066	5.88444	5.55972	5.88295	5.72287	5.69499	6.13783	6.29145	6.08218	5.63423	5.10981	5.56839	5.76416	5.40806	5.67141	5.72805
OG0002248	Lthed_scf0010.1_g025610.1	Qgl_scf0020.1_g025100.1	AT5G35180.3	AT5G35180.2	IV	4.74071	4.47442	4.595	4.57028	4.39185	4.37751	4.77332	5.19397	5.17361	5.19119	4.80365	4.29216	5.15907	4.49654	4.4444	4.5038	4.66848	4.49486	4.80562	4.6576	5.10595	5.18003	5.14383	5.673	4.61258	4.56589	4.82507	4.76425	4.68681	4.81112	4.85483	4.75175	4.63677	5.0708	5.4354	5.40702	5.44192	5.08985	4.80969	4.76942	4.96579	4.89347	4.55757	4.61482
OG0002250	Lthed_scf0030.1_g148250.1	Qgl_scf0010.1_g012860.1	AT3G63510.1	AT3G63510.1	II	2.08713	2.1389	2.01972	1.78558	1.68241	1.81112	1.88749	2.06753	2.33064	2.08477	2.8628	3.28456	2.48068	2.30934	1.58539	1.52962	1.80752	1.66919	1.91385	1.68124	1.68976	2.27929	2.13691	1.99633	2.33324	2.95113	2.5481	2.58624	2.12767	1.98896	2.16892	1.83278	1.95363	1.992	1.94778	2.37112	2.1236	2.66316	2.56988	2.79154	2.53105	2.1836	1.71005	1.83643
OG0002253	Lthed_scf0030.1_g138290.1	Qgl_scf0010.1_g033980.1	NA	NA	II	2.93285	2.71507	3.08783	2.58212	2.90357	2.89041	3.19147	2.82795	3.00466	3.06239	2.93964	2.46579	3.16054	3.29703	3.12035	3.31091	3.5129	3.23807	2.96158	3.00811	2.53113	2.79897	3.18281	2.8028	3.24153	2.73111	2.74762	2.98055	2.85858	2.93057	3.34945	3.0706	3.00066	3.12305	2.58491	2.94592	3.19425	2.65998	2.86478	2.57413	3.05136	3.33505	3.20137	3.19945
OG0002265	Lthed_scf0060.1_g068770.1	Qgl_scf0090.1_g050650.1	AT3G45650.1	AT3G45660.3	II	3.18583	3.23581	2.27538	2.01361	1.70697	2.27266	2.13388	1.25134	1.19913	1.35936	0.746125	0.730555	1.89768	3.64183	2.52641	2.78693	1.71604	2.29956	1.90488	2.20137	1.07171	1.00929	0.587739	0.386029	1.35991	0.64106	3.00103	2.64981	3.51606	3.42881	3.32263	3.33548	3.64558	2.05915	1.10293	0.696068	0.725874	0.707167	0.963078	1.24853	2.56021	3.64379	4.10475	3.60795
OG0002271	Lthed_scf0060.1_g022650.1	Qgl_scf0090.1_g094900.1	AT1G08280.1	AT1G08280.1	I	4.55778	4.39335	4.30355	4.18866	4.25126	4.16952	4.43837	3.48071	2.69115	1.98487	2.86638	4.91091	4.89442	3.42741	3.15929	4.36278	4.04039	4.80856	4.72224	4.17554	3.69477	2.44425	1.84868	1.22675	3.18949	5.08155	4.49924	4.671	4.86419	4.81463	4.36161	4.03549	3.90474	3.06996	1.40232	0.713891	1.35543	2.26715	3.81905	4.8023	4.31879	4.66692	3.31611	3.68008
OG0002272	Lthed_scf0060.1_g040400.1	Qgl_scf0090.1_g078830.1	AT2G40830.4	AT2G40830.4	IV	5.13975	4.98084	4.93316	5.42859	4.76797	5.02641	5.06488	5.60683	5.63059	6.12365	5.82246	4.9139	5.38444	5.42643	5.16999	5.12032	5.05357	5.01509	5.28653	5.2317	5.62781	5.98073	5.76211	6.10671	5.70104	5.20426	5.64886	5.47147	5.41802	5.34167	5.55984	5.45951	5.38108	5.55209	6.0004	6.17408	6.50206	6.12649	5.33096	5.33692	5.29885	5.4153	5.32662	5.55324
OG0002273	Lthed_scf0090.1_g027010.1	Qgl_scf0060.1_g085970.1	AT5G52200.1	AT5G52200.1	III	5.29792	4.4001	5.18422	5.66534	5.33613	5.09312	5.21839	6.41931	6.49464	6.33034	6.09092	6.25096	5.9118	4.71848	5.35465	5.26248	5.02824	5.00156	5.90584	5.72092	6.64656	6.46064	6.42038	7.01037	5.97643	6.54812	6.00658	6.10695	5.90136	5.55717	5.88446	5.76918	5.45516	6.18163	6.62882	6.83115	6.88435	6.84517	6.66841	6.48345	6.02954	6.13066	5.81049	6.03785
OG0002283	Lthed_scf0050.1_g039150.1	Qgl_scf0040.1_g046700.1	AT1G28100.6	AT1G28100.6	III	2.63141	2.90915	4.06615	3.81816	2.68154	2.36719	2.43422	2.48848	2.5793	2.30194	3.17107	2.82613	4.21071	2.48515	3.34974	2.73051	2.98464	2.16238	2.24894	2.15856	1.74027	1.92131	2.90039	1.36278	3.0142	4.13118	3.55763	3.28411	2.83762	2.90231	2.60945	3.16691	2.56871	2.27218	1.94997	1.64154	1.12738	1.77912	4.46844	4.41856	4.09513	3.32382	3.68978	3.66757
OG0002285	Lthed_scf0010.1_g079090.1	Qgl_scf0020.1_g076480.1	AT3G02360.2	AT3G02360.2	I	7.19641	6.72058	6.14244	6.7974	6.34409	6.3544	6.8084	7.379	7.73695	6.853	6.82934	7.29959	7.34467	7.00064	6.303	6.51651	5.86366	6.50509	7.07688	7.27949	7.61245	7.62456	7.05012	7.89327	6.52325	7.79337	7.77422	7.079	7.38927	7.18189	6.86808	6.99296	7.0775	7.31558	7.8305	7.94936	7.85981	7.63792	6.65496	7.3521	7.26123	7.22069	6.56876	6.33913
OG0002292	Lthed_scf0050.1_g049890.1	Qgl_scf0040.1_g056030.1	AT5G08305.1	AT5G08305.1	III	0.715222	0.416765	0.682056	0.13965	0.561397	0.899547	0.78825	0.259662	0.667635	0.193987	0.538586	0.749248	0.589724	0.621433	0.365127	0.768733	0.798963	0.649839	0.506708	0.366082	0.343635	0.264994	0.227143	0.200253	0.390985	1.0027	0.343749	0.419806	0.513335	0.712155	0.369201	0.675718	0.510938	0.33909	0.12431	0.271146	0.21322	0.0727316	0.822815	0.86976	0.63451	0.481548	0.658794	0.540857
OG0002303	Lthed_scf0030.1_g073530.1	Qgl_scf0010.1_g114230.1	AT4G00335.3	AT4G00335.3	IV	4.46271	4.32	4.84243	5.05834	4.77952	4.82595	4.90377	5.1454	5.5101	5.58617	4.97797	3.71304	4.19955	4.93137	5.29852	5.01841	5.126	4.73927	5.09045	5.03387	5.54905	5.70127	5.79111	5.94517	4.75325	3.85645	4.67861	4.76457	4.95192	4.94715	5.40392	5.53676	5.68651	5.99306	6.00167	6.2801	6.28392	5.89628	5.551	4.62427	4.56913	5.30004	5.31189	5.74714
OG0002306	Lthed_scf0070.1_g085730.1	Qgl_scf0080.1_g077650.1	AT5G12890.1	AT5G12890.1	I	0.795126	0.88431	1.37554	1.21227	1.1938	1.01832	1.62548	1.71405	1.34439	1.78249	2.13242	2.21598	2.16583	1.62995	1.1894	1.27918	0.885011	1.58475	2.06904	2.23021	1.47406	2.05058	2.15452	2.14175	2.25354	2.67921	2.05738	2.0351	2.76513	2.89493	2.50056	2.61862	3.05816	2.14553	1.3305	1.60866	1.86737	1.81504	2.38881	2.38399	2.90533	2.29536	1.83091	2.07566
OG0002310	Lthed_scf0100.1_g007910.1	Qgl_scf0100.1_g097890.1	AT5G19070.1	AT5G19070.1	I	5.81672	5.68836	5.70965	5.39087	5.59682	5.70481	5.74555	5.22875	5.41944	5.40222	5.38164	5.06434	5.77989	6.1521	6.00562	5.5193	5.53378	5.87644	5.39354	5.48204	5.19291	5.44303	5.28262	5.51734	5.04342	5.0954	5.76247	5.43916	5.51134	5.52141	5.6205	5.82093	5.76236	5.48879	5.47812	5.57985	5.65215	5.46225	5.28643	5.23864	5.78326	5.51046	5.71043	5.60588
OG0002311	Lthed_scf0100.1_g006000.1	Qgl_scf0100.1_g099480.1	AT5G45190.3	AT4G19600.1	V	5.10425	5.4407	5.53195	5.99424	5.5529	5.61083	4.99358	4.6274	4.63833	5.06423	4.80029	4.36106	5.30816	5.7129	5.98947	5.66903	5.30942	4.76494	4.84607	5.2784	4.14911	4.69689	5.6233	5.02988	4.49142	4.78486	5.25006	4.78034	4.93886	5.46716	5.11258	5.26503	5.17704	4.42802	4.16144	4.05399	4.57108	4.32308	4.37699	4.19852	5.64738	4.77485	5.72861	5.34709
OG0002315	Lthed_scf0100.1_g041580.1	Qgl_scf0100.1_g065760.1	AT3G23980.1	AT3G23980.1	I	3.82682	3.63269	3.68786	3.31769	3.58828	3.60715	3.53059	3.49199	3.42485	3.71705	3.38478	3.74192	3.7707	3.52832	3.62424	3.64906	3.67522	3.7694	3.65323	3.48892	3.23671	3.26139	3.5253	3.73774	3.2939	3.78588	3.69851	3.55576	3.69036	3.75749	3.80775	3.82989	3.89233	3.7118	4.2837	4.5456	4.39993	4.30373	3.71584	3.59997	3.69734	3.59306	3.99093	3.79045
OG0002317	Lthed_scf0100.1_g001810.1	Qgl_scf0100.1_g103500.1	AT1G04200.1	AT1G04200.1	V	4.84427	4.78325	4.49775	4.71732	4.83187	4.34398	4.73884	5.34222	5.15616	4.94264	4.7977	4.353	4.96641	5.10733	4.92794	4.92772	4.83577	4.6249	4.91775	4.85972	5.22872	5.33313	5.20706	5.55488	4.85546	4.48458	4.93506	5.02045	5.11405	4.99279	5.11651	5.28852	5.23195	5.60513	5.69976	5.61341	5.28384	4.80715	4.85757	4.83747	5.13746	5.46321	5.13652	5.30905
OG0002321	Lthed_scf0100.1_g041930.1	Qgl_scf0100.1_g065310.1	NA	NA	V	5.65717	6.02005	6.19148	5.8199	6.21254	5.83472	6.0426	6.65841	6.78213	6.75162	6.19354	4.86759	5.9612	5.96735	6.2937	6.3099	6.13953	5.72185	6.02995	6.01594	7.13893	7.28493	7.53647	7.42697	6.08362	4.99269	6.13181	5.57295	5.98902	5.67954	5.8325	5.88274	5.45177	6.51985	6.66353	6.44055	5.98311	5.59701	5.16513	5.23498	5.91578	6.82697	6.25285	6.5486
OG0002322	Lthed_scf0020.1_g022900.1	Qgl_scf0030.1_g167110.1	AT1G55110.3	AT1G55110.3	IV	3.29125	2.79415	2.61234	3.15934	3.3489	2.92881	3.7662	4.41751	4.07272	4.17683	3.68539	3.14075	3.80995	3.9969	3.69762	2.83043	2.10706	2.81178	2.83501	3.33471	4.41	4.26692	3.75707	3.96606	3.81386	3.53803	3.93763	4.19333	4.05693	3.69633	4.18595	3.80558	3.91943	4.9952	4.78235	4.90927	5.15033	5.15871	4.17747	4.10101	4.02477	4.71587	4.05922	4.3107
OG0002325	Lthed_scf0020.1_g073110.1	Qgl_scf0030.1_g108970.1	AT1G16010.3	AT1G16010.3	III	3.33046	3.32018	3.38037	3.09754	2.82462	2.97023	3.344	3.48367	3.75825	3.632	3.51911	3.84451	3.73545	3.41827	3.39382	3.36457	3.31928	3.36448	3.66991	3.37124	3.59916	3.64905	3.55878	3.60273	3.62394	4.09776	3.76721	3.36128	3.32559	3.37889	3.17606	3.46658	3.2536	3.49332	3.7513	3.72646	3.52165	3.38325	3.463	3.55656	3.51951	3.66777	3.62186	3.4728
OG0002326	Lthed_scf0020.1_g075430.1	Qgl_scf0030.1_g107270.1	AT2G24130.2	AT2G24130.2	I	0.438307	0.126875	0.588695	0.183788	0.648013	0.514705	0.343878	0.108164	0.195842	0.0668637	0.112716	0.103688	0.50257	0.89579	0.860159	0.375287	0.48637	0.466233	0.308652	0.324952	0.274246	0.21065	0.11285	0.0439535	0.310121	0.18446	0.808295	0.560922	0.768566	0.745641	0.655628	0.348494	0.702004	0.450231	0.205128	0.0815223	0.116647	0.11748	0.332054	0.393569	0.868523	0.651277	0.511887	0.621691
OG0002329	Lthed_scf0040.1_g002280.1	Qgl_scf0050.1_g130840.1	AT5G05230.1	AT5G05230.1	III	4.03839	4.16912	4.05546	4.07942	4.01079	4.07805	3.9998	4.34283	4.40401	4.47442	4.66197	4.14708	3.4937	3.86739	4.01452	4.09476	4.11173	3.75493	3.97535	4.07185	3.89843	4.4616	4.40863	4.0076	4.26256	3.58854	3.7746	3.80615	4.02507	3.87364	4.02904	4.07983	3.86143	3.85093	4.08164	4.04457	4.11786	3.7262	3.30012	3.56057	3.59544	3.66012	3.96037	3.8969
OG0002343	Lthed_scf0100.1_g071780.1	Qgl_scf0100.1_g042710.1	AT3G51150.1	AT5G66310.3	I	4.05419	4.0018	3.95164	4.10939	4.13606	4.22435	4.61783	3.78599	3.11057	3.23037	3.53797	3.9762	3.7328	3.59443	2.94004	4.00713	3.93984	4.281	4.8209	4.52027	3.9207	3.27873	2.32639	2.70325	3.56214	3.87517	3.61063	3.43811	3.98479	4.21214	4.02874	4.01372	4.26093	3.77539	3.46667	2.60501	1.98782	2.86607	3.36555	3.78197	4.04614	4.20036	3.38446	3.51407
OG0002345	Lthed_scf0070.1_g031810.1	Qgl_scf0080.1_g025950.1	AT1G65420.1	AT1G65420.1	II	2.77172	2.31962	3.47667	2.39804	3.26329	3.35441	2.78212	2.39544	2.23893	3.00704	3.06675	3.21675	2.96084	2.56674	2.70685	2.79382	3.00262	3.11308	2.91671	3.25852	2.15589	2.64868	2.33615	1.52158	2.90248	2.41302	2.77698	2.72652	2.36019	2.42866	2.5961	3.08959	3.01544	2.3043	1.21166	0.723931	1.70421	2.09965	2.24752	1.61467	2.45159	1.96858	2.73587	2.28046
OG0002346	Lthed_scf0120.1_g049100.1	Qgl_scf0120.1_g044270.1	AT2G22410.1	AT2G22410.1	IV	1.11787	0.898815	1.15615	1.33999	1.15509	1.4799	1.44171	1.60657	1.55428	1.70791	1.26392	2.17319	0.851802	0.847372	0.497662	1.25638	1.38956	1.25933	1.09238	1.22604	1.62528	1.1905	1.18036	0.596657	1.3768	1.71957	0.877143	1.3257	1.03114	0.978086	1.08925	0.970227	1.32662	1.38214	1.12394	0.360353	0.562123	0.880998	1.78166	1.69376	0.896118	1.44103	1.0709	0.974821
OG0002353	Lthed_scf0010.1_g169100.1	Qgl_scf0020.1_g165210.1	AT2G33670.1	AT2G33670.1	II	0.211876	0.303309	0.439631	0.43778	0.458279	0.119488	0.817064	0.540662	0.944796	1.17417	1.42295	1.34844	0.738854	0.649006	0.34769	0.14736	0.200919	0.307923	0.340999	0.585235	0.542233	0.756036	0.754158	0.706055	1.02511	0.723432	0.565923	0.510997	0.42867	0.477332	0.248417	0.44014	0.528394	0.569141	0.860006	1.02127	1.1706	0.958201	0.859058	0.55149	0.760034	0.238218	0.29192	0.325982
OG0002361	Lthed_scf0080.1_g063870.1	Qgl_scf0070.1_g053790.1	AT1G53200.1	AT1G53200.1	III	3.15898	3.28467	3.14889	2.99092	3.2305	3.53013	3.09428	3.29348	3.26648	4.21055	3.86191	3.15443	3.00732	2.92055	3.11995	3.21641	3.50764	3.22966	3.21362	3.33021	3.47601	3.59869	4.00373	3.88859	3.82648	3.53118	2.81766	3.1407	3.24635	3.11039	3.33922	3.17567	3.22743	3.37842	3.45664	3.79653	4.20513	3.86037	3.91593	3.2672	3.15692	3.22304	3.22456	3.1865
OG0002362	Lthed_scf0010.1_g109770.1	Qgl_scf0020.1_g105340.1	AT4G29960.1	AT4G29960.1	III	6.04761	5.80079	5.33902	5.43444	5.56335	5.37056	5.75031	6.08652	6.10831	5.83299	5.88894	6.64217	6.36214	5.86084	5.56116	5.29728	5.19709	5.87135	5.73085	5.8145	5.56875	5.92616	5.27209	5.71705	5.56624	6.35502	5.89753	6.12089	5.98185	6.12578	5.5511	5.93082	5.95691	6.2017	6.3892	6.83353	7.34808	6.55868	5.72659	6.26628	6.14569	5.7765	5.57575	5.49823
OG0002365	Lthed_scf0120.1_g065130.1	Qgl_scf0120.1_g057750.1	AT4G32551.1	AT4G32551.1	V	6.53314	6.65754	6.5162	6.74348	6.65925	6.60939	6.99836	7.23434	7.65787	7.63621	7.21879	6.71861	6.51841	6.41596	6.41725	6.83271	6.81919	6.4231	7.00239	7.081	7.68247	7.75493	8.26189	8.05746	7.24474	6.39471	6.55202	6.54233	6.70112	6.66646	6.87427	6.78171	6.95563	6.68845	7.171	7.18571	7.16154	7.07989	6.88115	6.69366	6.55705	6.78027	6.69022	6.86777
OG0002374	Lthed_scf0010.1_g062990.1	Qgl_scf0020.1_g062140.1	AT3G27160.1	AT3G27160.1	II	5.91578	6.14268	5.72786	5.91493	5.28499	5.36474	5.90495	6.33646	6.27034	6.30444	5.94853	6.48166	6.44777	5.82155	5.4712	5.3985	5.05505	5.32271	5.81149	6.07522	5.98394	6.13398	6.47688	6.31229	6.43106	6.79295	6.40036	6.47839	5.9534	6.0807	5.83486	6.02874	5.95533	6.30262	6.43448	6.1211	6.20031	6.22922	7.25366	7.08455	6.95184	6.55908	6.12355	5.85358
OG0002386	Lthed_scf0100.1_g062700.1	Qgl_scf0100.1_g050540.1	AT2G38820.2	AT2G38820.2	III	0.131483	0	0	0.657638	0.139196	0.142671	0.799897	0.587806	1.24519	0.165667	0.878099	1.60383	0.203558	0.380347	0.783416	0.42349	0.427314	0.440183	0.796059	0.290379	1.06793	0.744846	0.729321	0.9834	0.875469	1.08642	0.374566	0.973751	0.176838	0.101179	0	0.172793	0.0522975	0.140652	0	0	0.127863	0	0.173352	0.56042	0.0544212	0.10302	0.355882	0.580093
OG0002398	Lthed_scf0010.1_g037760.1	Qgl_scf0020.1_g036120.1	AT3G24450.1	AT3G24450.1	I	2.65298	2.0077	3.4445	0.996658	3.12262	2.89231	2.11031	0	0	0	0	1.4822	3.60038	3.79539	3.71057	2.7877	3.30281	2.65094	1.92837	2.32528	0.838823	0.179352	0.336096	0	0.4397	0.996541	2.90183	2.77708	2.43462	2.25159	2.15255	2.24941	2.4099	1.29513	0	0.21481	0	0.809805	1.73599	1.84653	2.92289	4.04235	3.79267	3.23295
OG0002401	Lthed_scf0090.1_g073030.1	Qgl_scf0060.1_g038860.1	AT2G31280.1	AT2G31280.1	III	4.71749	4.56185	4.22399	4.82207	4.13376	4.35344	4.48432	4.84952	4.60894	4.82393	5.05838	4.55013	5.0288	5.46956	5.36305	4.65696	4.23476	4.08107	4.69226	4.60804	5.09808	4.84957	5.18004	4.91277	5.02927	4.91716	5.30984	6.12732	5.96294	5.31934	5.38925	4.94022	4.87927	5.08074	4.93713	4.95454	5.5557	5.4077	5.56374	5.76497	5.47339	5.41782	5.29988	5.18223
OG0002405	Lthed_scf0070.1_g035560.1	Qgl_scf0080.1_g029630.1	AT5G07740.1	AT5G07740.1	I	3.2774	3.28605	3.41037	3.06328	3.25975	3.28434	3.27293	2.96061	2.23999	2.63197	3.01732	3.10305	3.60266	3.46032	3.4107	3.30071	3.18925	3.32948	3.40635	3.14984	2.75514	2.26352	2.12083	1.63423	2.57708	3.03778	3.22679	2.9693	3.54418	3.3265	3.34723	3.21134	3.06187	2.24155	1.79426	1.32259	1.33332	1.53992	2.36715	3.05494	3.47724	3.14155	3.26256	2.93908
OG0002406	Lthed_scf0070.1_g033980.1	Qgl_scf0080.1_g028050.1	AT3G47550.6	AT3G47550.6	V	6.48886	6.40266	6.4967	6.75349	6.68007	6.33623	6.66938	6.74931	6.71766	6.57585	6.46482	6.30862	6.83536	6.75439	6.7467	6.54557	6.32083	6.38138	6.81036	6.76107	7.09695	6.8263	6.70173	7.02789	6.40886	6.45258	6.92535	6.69595	6.87861	6.70684	6.72786	6.71266	6.51196	6.57471	6.47432	6.69839	6.67692	6.42418	6.23807	6.54375	6.62324	6.732	6.45626	6.54116
OG0002409	Lthed_scf0070.1_g022860.1	Qgl_scf0080.1_g017130.1	AT5G62810.1	AT5G62810.1	III	4.93346	4.87748	4.92911	4.86056	5.05263	4.962	4.97547	5.28322	5.39051	5.57381	5.30856	5.54175	4.85706	5.02629	4.84717	4.87063	5.08483	4.59715	4.7508	4.74655	4.75499	5.21708	5.3217	5.39971	5.00878	5.05607	4.59482	4.79462	4.64054	4.81377	4.89634	4.86336	4.78775	5.15406	5.08309	5.28057	5.72068	5.4369	4.81812	4.82561	4.87115	4.90854	4.83462	4.78293
OG0002419	Lthed_scf0120.1_g066810.1	Qgl_scf0120.1_g059180.1	AT4G35785.2	AT4G35785.2	III	5.12389	5.47344	5.26745	4.28574	5.08298	5.29153	4.9303	4.10776	3.58578	3.6358	3.82306	5.01019	4.91758	5.22469	5.43221	4.88085	5.35965	5.43426	4.5164	4.61733	4.79045	4.14308	4.28742	4.51828	4.27098	4.61112	4.61048	5.01803	4.86246	5.43787	5.4187	5.52897	5.75076	4.50088	4.19092	3.69638	3.8429	3.3173	4.58379	4.94787	4.74801	4.68792	5.4586	6.19629
OG0002426	Lthed_scf0040.1_g077750.1	Qgl_scf0050.1_g057780.1	AT3G15010.2	AT3G15010.2	IV	6.77021	6.60241	6.75799	6.61647	6.77075	6.87778	6.9244	7.00603	7.21982	7.5438	7.57501	7.45918	6.80308	6.4839	6.64347	6.58223	6.99644	6.79536	6.68216	6.5145	6.61076	7.54266	7.15378	7.37147	7.09597	6.89786	6.47192	7.04954	6.81273	6.88269	7.01683	6.87356	6.72476	6.90753	6.96464	7.51676	7.51943	6.93853	5.89676	6.94032	6.68193	6.43532	6.26	6.77857
OG0002428	Lthed_scf0040.1_g105510.1	Qgl_scf0050.1_g035820.1	AT4G27360.1	AT4G27360.1	II	2.22128	3.11443	5.80937	1.14821	3.637	4.62264	0	2.71825	4.27477	5.57176	3.34857	0	0.945061	2.09093	2.07385	2.5126	5.58821	4.27063	0.515884	1.16408	1.76537	3.45069	3.81629	4.99497	3.83617	0.744034	1.37337	2.48435	1.21483	0.469236	1.49608	0.882477	0.612386	2.19256	6.28756	7.57427	5.3414	6.60541	1.84683	1.73242	1.60379	2.76386	1.55175	0.897819
OG0002429	Lthed_scf0040.1_g109960.1	Qgl_scf0050.1_g031840.1	AT5G54540.1	AT5G54540.1	IV	6.54666	6.8402	7.22224	6.85129	7.0675	7.18718	6.83293	7.11909	7.19636	7.39711	7.33327	6.56767	6.52242	7.24359	7.38215	7.12274	7.76457	7.2441	6.76487	6.5982	6.95967	7.23111	7.6712	7.60617	7.09239	6.40625	6.57521	7.02446	6.87113	6.75455	7.03626	7.0397	7.17495	7.19214	7.50476	8.16151	8.58458	8.00168	7.16683	6.8239	6.56437	6.70077	6.94851	7.54383
OG0002434	Lthed_scf0010.1_g017490.1	Qgl_scf0020.1_g017780.1	AT4G30380.2	AT4G30380.2	I	6.09174	4.78508	1.30958	2.15336	2.88458	1.34613	3.37342	3.32688	2.64496	2.71307	1.59756	2.77773	7.89975	5.98922	3.83292	1.88696	1.74014	3.15554	1.78464	1.9228	3.06148	2.46225	2.02215	1.70114	0.91896	4.61084	7.27768	3.38226	4.15683	1.62663	1.86212	0.590397	0.774699	0	0	0	0	0	0	3.70082	4.25589	2.22791	1.35555	1.52761
OG0002454	Lthed_scf0100.1_g088350.1	Qgl_scf0100.1_g016090.1	AT2G18570.1	AT3G50740.1	I	4.64492	4.62627	4.46184	4.95446	4.77422	4.79509	4.07057	3.41907	3.80735	3.47276	3.80751	2.48171	2.03559	3.20044	3.34023	5.13635	4.82871	4.48496	4.67757	4.84139	3.88946	3.65208	3.3762	2.55052	3.6367	0.996994	3.21848	1.1379	0.371035	0.444073	0.162737	0.517492	0.464581	0.635956	0.373251	0.542096	0.600519	0.186641	0.380846	0.371487	0.327281	0.146426	0.468091	0.804811
OG0002475	Lthed_scf0010.1_g133290.1	Qgl_scf0020.1_g125490.1	AT1G71840.1	AT1G71840.1	III	4.73347	4.63773	4.33385	4.85367	4.95339	4.41095	5.22438	5.64368	5.77307	5.67689	5.54577	5.71972	4.79873	4.61103	4.35765	4.74346	4.80337	4.42924	4.91164	5.02612	5.63141	5.71403	5.85508	5.96695	5.37548	5.60717	4.63822	4.88645	4.36666	4.30044	4.47565	4.56174	4.49872	5.0018	5.06201	5.08792	5.13877	4.95051	5.09302	4.92266	4.40924	4.34202	4.22791	4.44811
OG0002477	Lthed_scf0010.1_g198490.1	Qgl_scf0020.1_g192100.1	AT5G26040.2	AT5G26040.2	IV	3.62435	3.9402	4.08998	3.22611	3.84396	3.68636	3.86188	3.62579	3.93614	4.47234	4.36952	3.1825	3.16477	3.52026	3.9546	4.12435	4.81289	3.78869	3.59279	3.94675	3.68257	4.59385	4.85258	4.28034	4.37188	3.36331	3.31613	3.42674	3.47182	3.66791	3.58604	3.88302	3.81305	4.05562	4.34364	4.48051	4.73615	4.83887	4.12913	3.21621	3.48412	3.55653	4.07684	3.92529
OG0002478	Lthed_scf0010.1_g182460.1	Qgl_scf0020.1_g176910.1	AT1G19600.1	AT1G19600.1	III	5.80915	5.96889	5.22981	6.0884	5.40553	4.80585	5.46538	5.30925	5.4388	5.12565	5.00191	5.73352	6.00252	6.01326	5.47019	5.09613	5.07792	4.85026	5.29678	4.99354	5.02276	5.0623	5.29676	4.93059	5.21332	5.82739	5.70061	6.13476	6.10367	5.89165	5.86351	5.86227	5.8393	5.50058	5.47972	5.64717	5.91551	5.74548	5.29843	6.09416	5.92139	5.4466	5.41467	6.16679
OG0002479	Lthed_scf0010.1_g096670.1	Qgl_scf0020.1_g092680.1	AT1G67090.1	AT5G38410.1	II	10.9286	10.3487	10.1671	10.4471	9.58522	9.97483	10.314	10.77	11.1346	10.9213	10.2438	10.8575	11.5741	9.56625	10.1383	9.67958	9.82124	9.93472	10.3797	10.6149	10.7379	10.9762	11.3173	11.3495	11.0621	11.1749	11.7579	10.4133	10.2277	10.4135	9.95325	10.3633	10.3191	10.5143	10.4444	9.87538	9.17136	9.29919	11.2402	11.2001	11.7258	11.0236	9.82132	10.4074
OG0002487	Lthed_scf0010.1_g025020.1	Qgl_scf0020.1_g024280.1	AT4G19810.2	AT4G19810.2	V	1.4626	1.79153	0.844103	1.14086	0.62037	0.455022	0.409402	1.12906	1.07428	1.37048	1.41728	1.49863	2.52115	1.97708	2.70761	1.88552	1.07913	0.95177	1.25366	1.22092	1.10966	1.2132	1.43763	1.58647	1.42063	2.7444	2.07507	2.73784	2.18172	2.40952	2.20022	1.68926	1.88317	1.0108	1.70717	1.95015	1.76767	1.02756	1.29973	1.29123	1.669	1.86108	2.31507	2.38494
OG0002493	Lthed_scf0030.1_g096150.1	Qgl_scf0010.1_g086120.1	AT3G52240.1	AT3G52240.1	III	4.40597	4.2116	4.55731	4.05999	4.41335	4.47988	4.36858	4.20565	4.08118	4.88208	4.36225	3.66714	4.27391	4.46392	4.62344	4.64444	4.64173	4.59463	4.35587	4.46113	4.29412	4.47761	4.30345	4.31107	4.25363	3.60573	4.10219	4.26384	4.22276	4.25907	4.35449	4.34731	4.47423	4.29806	4.30547	4.45838	4.80533	4.51012	4.06618	3.9481	3.99266	4.1645	4.61033	4.49097
OG0002496	Lthed_scf0060.1_g025010.1	Qgl_scf0090.1_g091830.1	AT5G22640.3	AT5G22640.1	II	3.77543	3.63528	3.35471	3.80706	3.57314	3.64608	3.82315	3.93689	4.17557	4.32696	4.37399	4.34652	4.13862	3.56738	3.18916	3.41846	3.56444	3.38977	3.71135	3.79765	3.75616	3.96406	4.34342	3.54905	4.22693	4.06264	3.78832	4.03645	3.90285	3.98365	3.99751	3.94572	3.98458	4.0823	4.17036	4.03924	4.17172	4.20707	4.505	4.24489	4.14773	4.13931	3.97218	3.653
OG0002507	Lthed_scf0110.1_g095810.1	Qgl_scf0110.1_g004430.1	AT3G53490.1	AT3G53490.1	IV	3.19046	2.78872	2.90496	2.8464	3.58513	3.2201	3.11821	3.24431	3.85768	3.56654	3.2758	3.20288	2.66631	3.27392	3.18056	3.33247	4.3067	3.86754	2.6369	3.0724	3.37414	3.62219	3.86168	3.88277	3.32643	2.9063	2.90541	2.79087	2.68961	2.62063	2.81382	2.79098	2.88433	3.46451	4.60401	4.82592	4.6335	4.61829	3.65763	2.85316	2.70806	3.1629	3.21822	2.95309
OG0002508	Lthed_scf0110.1_g091060.1	Qgl_scf0110.1_g008960.1	AT5G03330.2	AT5G03330.2	IV	5.06348	5.05371	4.89321	5.24201	4.74441	4.5339	4.55469	5.91857	6.03044	5.85546	5.73298	4.4563	5.08145	5.22241	5.19695	4.63823	4.2762	4.43306	4.97444	5.09172	5.44321	5.5972	5.90105	6.71052	5.60208	5.54234	5.51412	6.65217	5.80968	5.22487	5.38131	4.98808	4.86629	6.30554	6.31545	7.13368	8.12009	7.48699	7.44648	6.69724	6.09243	6.0139	5.4331	5.37051
OG0002510	Lthed_scf0110.1_g027190.1	Qgl_scf0110.1_g059420.1	AT3G10740.4	AT3G10740.4	II	5.63501	5.63232	5.79544	5.20569	5.48577	5.686	5.66845	5.5712	5.26617	5.54702	4.9117	4.42576	5.60749	5.97938	5.86741	5.58298	5.90294	5.78521	5.1508	5.4951	4.64158	5.27948	5.40913	4.86603	5.27663	4.9402	5.80235	5.94975	5.90957	6.2269	5.95759	6.32884	6.28816	5.81357	5.50115	5.47061	5.47835	5.06343	5.29314	5.71538	6.12144	6.01784	6.45488	6.42909
OG0002516	Lthed_scf0020.1_g124950.1	Qgl_scf0030.1_g053170.1	AT1G30460.1	AT1G30460.1	IV	3.77643	3.48278	3.74997	4.14506	3.879	3.784	3.84184	4.22315	4.37644	4.322	4.1039	4.60098	3.8343	3.93235	3.96487	4.19714	4.31628	4.13133	4.03921	4.13136	4.64505	4.88708	4.88943	5.03622	4.65522	4.55859	3.77474	3.83108	3.90113	3.67689	4.05514	3.78849	3.78531	3.93704	4.14595	4.3163	4.2965	4.13071	3.65432	4.01476	3.47143	3.64116	3.50472	3.84498
OG0002517	Lthed_scf0020.1_g140510.1	Qgl_scf0030.1_g039660.1	AT5G47750.1	AT5G47750.1	IV	5.50176	5.76598	5.71967	5.83221	5.70107	5.59494	5.66038	6.01194	6.10081	6.21945	6.06514	5.45244	5.63187	5.52731	5.5852	5.73031	5.63372	5.59155	5.90007	5.75063	6.18616	6.25901	6.24237	6.93189	5.98805	5.63698	5.77364	6.03543	5.99186	5.92435	6.15082	5.92417	5.84357	6.1193	6.78455	7.02157	6.92588	6.67552	6.24592	6.0526	5.85495	6.11872	6.02075	6.12052
OG0002529	Lthed_scf0110.1_g025720.1	Qgl_scf0110.1_g060160.1	AT2G40830.4	AT2G40830.4	II	6.72211	6.43282	6.71413	6.56142	6.7381	6.75143	6.953	7.00148	7.0329	7.15671	6.58588	6.26628	6.73599	6.67706	6.68718	6.72458	7.00028	6.83695	6.9593	7.11758	7.29477	7.35901	7.44418	7.3596	6.82502	6.51196	6.83518	6.72999	6.88241	6.88141	6.87269	7.0822	7.12527	7.16375	6.81147	6.59759	6.22443	5.86504	6.07017	6.57621	6.72926	6.80635	6.82238	7.03102
OG0002534	Lthed_scf0110.1_g078590.1	Qgl_scf0110.1_g017320.1	AT2G36270.2	AT2G36270.2	I	2.08659	1.75714	1.7919	0.934176	1.56162	1.33284	1.30796	0.748018	0.680888	1.00201	1.30324	0.683261	2.06857	0.732837	1.18285	1.87884	2.15617	1.29918	1.43034	1.80858	1.09188	1.37683	0.42144	0.9142	1.30868	2.56858	1.80805	1.82311	2.25732	2.30975	2.05653	2.3251	1.77618	1.19916	1.10707	0.859386	1.45299	1.13479	1.23018	1.71842	2.99263	3.01598	3.00757	2.84255
OG0002535	Lthed_scf0110.1_g082130.1	Qgl_scf0110.1_g014870.1	AT3G53030.1	AT3G53030.1	III	4.15678	3.92447	4.14304	3.73314	3.68998	3.50743	3.90913	3.90626	3.7816	3.65252	3.65372	4.01416	4.01112	3.97589	3.60564	3.88725	3.42957	3.92799	3.89548	3.95483	3.61784	3.52011	3.78983	3.71098	3.70258	3.58304	4.00204	3.95613	4.08244	4.05434	4.18736	4.04859	4.026	3.80603	2.84985	3.53779	3.89013	3.40343	3.45442	3.70644	4.15255	3.97081	3.99306	3.87348
OG0002540	Lthed_scf0110.1_g050720.1	Qgl_scf0110.1_g041900.1	AT3G11950.5	AT3G11950.5	I	3.12167	2.75764	3.37454	2.66053	2.97547	3.46904	2.98018	2.46236	1.89814	2.03529	2.01157	3.20412	3.29918	3.07967	3.00337	2.65377	3.2898	2.92549	2.78095	2.72779	1.60029	1.93338	1.52829	1.35503	1.66829	3.51928	3.03619	3.3499	3.68823	3.47191	3.46905	3.43365	3.53314	3.23305	2.73347	2.88242	2.87654	3.48665	3.21114	3.42454	3.78235	3.72655	3.92664	3.74941
OG0002567	Lthed_scf0040.1_g110890.1	Qgl_scf0050.1_g031160.1	AT5G48150.4	AT5G48150.4	V	4.85522	6.7808	7.4336	6.91347	7.71971	7.35889	3.78396	4.19073	5.88678	4.18391	3.95752	4.02582	4.8868	6.70422	7.99673	6.99836	5.98841	5.07088	3.43664	5.67642	4.87254	5.0336	5.25591	5.19387	5.81985	3.60678	4.27192	4.63549	4.50872	4.95244	4.90743	5.41574	4.84741	4.70562	6.49651	7.09131	4.21204	7.08464	4.27732	3.09704	4.32661	4.46224	6.78483	5.00919
OG0002577	Lthed_scf0100.1_g061660.1	Qgl_scf0100.1_g009600.1	NA	NA	V	4.20223	4.30324	3.956	4.86139	4.29444	4.35483	4.3368	4.21088	4.04979	4.47822	3.7418	2.91983	3.76954	1.32583	3.89403	4.97203	4.55475	4.5171	5.09465	4.9506	4.91756	4.74769	4.42181	5.05526	4.64735	3.42853	3.98906	1.09647	1.76356	1.69558	1.85793	1.83287	1.76328	1.69104	1.90329	1.59101	1.47309	0.885837	1.18816	1.41658	2.05551	2.03731	1.81534	1.78561
OG0002582	Lthed_scf0080.1_g105530.1	Qgl_scf0070.1_g006430.1	AT5G20810.2	AT5G20810.1	I	5.05978	4.23295	4.81326	5.24384	4.54901	4.91014	4.97438	4.89894	3.8829	3.56323	4.11375	4.5639	5.10252	4.7739	4.22342	5.1115	4.79816	4.92808	5.62303	5.45244	5.22567	4.29738	4.29613	4.03323	4.81499	4.77327	5.3889	3.96647	4.51392	4.39843	4.36795	4.0685	3.65365	3.65673	3.67622	2.99072	3.79735	4.27866	4.63967	4.48893	4.47729	4.27839	3.6403	3.6811
OG0002624	Lthed_scf0030.1_g024350.1	Qgl_scf0010.1_g167550.1	AT1G45616.1	AT1G45616.1	IV	0.693104	0.426268	0.710764	0.397952	0.33141	0.781332	0.260012	0.305261	0.342856	0.529771	0.418444	0.16768	0.338597	0.761491	0.483856	0.487705	0.549613	0.212601	0.0602012	0.157952	0.216542	0.0601364	0.248271	0.289713	0.308898	0.163335	0.293853	0.331649	0.0312354	0.110565	0.0297912	0.108043	0.0462091	0.0257845	0.0135722	0.0153888	0.163563	0	0.0260474	0.0236522	0	0	0.334792	0.367688
OG0002676	Lthed_scf0080.1_g098260.1	Qgl_scf0070.1_g012520.1	AT5G53130.1	AT5G53130.1	III	1.08868	0.88351	0.706582	0.975385	0.413348	0.426921	0.645957	0.411435	0.233605	0.653564	0.712958	0.6258	2.2953	0.935505	1.53436	1.64395	1.2182	1.75616	2.00438	1.19073	0.770927	0.194261	0.104683	0.268154	0.677645	1.41942	2.19002	1.17343	1.11383	1.09605	0.836664	1.22221	0.650704	0.680227	0.681649	0.321526	0.426893	0.483487	0.900622	0.894188	1.50134	1.93061	1.24233	1.17239
OG0002680	Lthed_scf0090.1_g017430.1	Qgl_scf0060.1_g097600.1	AT5G53390.1	AT3G49210.1	I	4.50704	3.62718	2.88931	1.92789	2.17707	2.4351	1.24252	1.61653	0.787311	0.576788	0.988317	0.331898	2.23925	2.49623	2.47013	2.84267	3.20143	3.83913	1.72968	1.57227	0.84432	0.491037	0.765521	0.729002	0.708027	0.524371	2.91216	1.52589	1.10111	1.73977	1.71796	1.83473	1.80187	0.800756	0.800316	0.181328	0.408378	0.111202	0.440637	0.836154	1.80165	2.311	1.86506	1.94344
OG0002749	Lthed_scf0110.1_g019610.1	Qgl_scf0110.1_g065900.1	AT1G80270.5	AT1G80270.5	V	4.41871	4.53183	3.74244	4.6335	3.93693	4.12585	4.51096	4.80044	5.02339	4.83743	4.99178	5.54937	4.31129	4.08284	3.83985	4.04486	3.96854	4.06864	4.6466	4.73355	5.2226	5.18804	5.26527	5.12138	5.0289	5.49079	4.44849	5.0098	4.75664	4.87942	4.89119	4.75825	4.90811	4.98044	5.04545	5.10649	5.13891	5.49718	5.49978	5.38445	4.78378	4.82502	4.64138	4.5667
OG0002750	Lthed_scf0070.1_g027540.1	Qgl_scf0080.1_g022030.1	AT5G13050.1	AT5G13050.1	II	3.63461	3.49287	3.78568	3.45438	2.62808	3.82362	3.56399	3.61366	3.82694	3.49698	3.66789	3.69972	3.94985	3.52087	3.61805	3.35152	2.69059	3.27357	3.37646	3.64368	2.97864	3.44626	3.28523	3.35039	3.73276	3.94915	3.64877	2.96215	3.20954	3.48367	3.05948	3.49568	3.35059	3.16653	3.0267	2.78664	2.23426	2.42735	2.93	3.50254	3.75791	3.41867	3.47091	2.82678
OG0002752	Lthed_scf0090.1_g022660.1	Qgl_scf0060.1_g090910.1	AT1G01490.2	AT5G52740.1	III	7.0792	7.60723	8.08985	7.74063	8.16286	8.11383	6.29609	5.49643	6.37305	5.43558	6.14961	5.06012	6.41818	7.53849	8.25671	7.53024	7.61544	6.60091	5.25909	6.40921	5.07156	5.79171	5.66318	4.47627	5.28362	5.20498	6.55042	5.59816	5.48323	6.08241	6.04852	5.88867	5.69245	6.08714	6.68079	6.14343	5.26739	6.51862	4.93311	4.62747	5.37737	5.50993	7.36814	6.15038
OG0002760	Lthed_scf0090.1_g064680.1	Qgl_scf0060.1_g046890.1	AT1G77590.1	AT1G77590.1	II	3.92692	3.78038	3.60625	3.9224	3.22312	3.81527	4.17095	4.74626	4.30021	4.31028	4.2936	4.64512	4.35032	3.77152	2.90279	3.60859	3.92743	3.80854	4.47304	4.25505	4.38392	4.43993	4.36146	4.43723	4.48409	5.19408	4.22528	4.16254	4.2041	4.3032	3.92654	4.16087	4.42494	4.22614	4.38021	4.29364	4.27528	4.11953	4.54813	4.66004	4.64599	4.44657	3.81077	3.74927
OG0002761	Lthed_scf0090.1_g064300.1	Qgl_scf0060.1_g047080.1	AT4G08330.1	AT4G08330.1	IV	4.37242	4.16456	5.02321	4.54381	4.64186	4.81044	4.43368	4.49579	5.44907	5.27388	4.71624	3.63012	4.57572	5.03819	5.30224	4.86751	4.98119	4.60041	3.93874	4.53983	5.09879	5.2789	5.41497	5.72666	4.75392	3.69643	4.98344	4.8934	4.25658	4.16414	4.7342	4.73249	4.1795	5.17094	6.79169	5.8361	5.69022	6.33952	5.35562	4.49671	4.48846	4.87166	5.13559	4.99778
OG0002764	Lthed_scf0090.1_g038980.1	Qgl_scf0060.1_g072400.1	AT5G16660.1	AT5G16660.1	II	7.109	6.76756	6.66808	7.23058	6.98951	6.71648	7.19346	7.34137	7.11324	6.85637	6.68364	7.38833	7.34863	7.19038	6.93158	6.91072	6.68532	7.00621	7.17889	7.14272	6.98387	7.01473	6.62613	6.95701	6.71591	7.44732	7.10714	6.76278	6.86996	7.00424	6.8867	6.89557	6.68724	6.81796	6.95587	7.04745	6.89983	6.66068	6.70633	7.36683	7.28369	6.81104	6.49562	6.56595
OG0002766	Lthed_scf0090.1_g011110.1	Qgl_scf0060.1_g106700.1	AT5G17560.1	AT5G17560.1	II	5.66086	5.43302	5.64593	5.93914	5.84835	5.54301	6.02132	6.03864	6.08547	6.29344	6.2023	6.0363	5.95526	5.65893	6.10525	5.72471	5.54357	5.68918	6.10989	5.8333	6.40422	6.24243	6.25828	6.25529	6.2955	6.13492	5.7578	6.39038	6.06073	5.96259	6.12481	6.08435	6.29304	6.56554	6.35485	6.30908	6.21631	5.96962	6.101	6.61901	6.18938	6.15329	5.71382	6.37558
OG0002768	Lthed_scf0090.1_g014760.1	Qgl_scf0060.1_g103210.1	AT4G27780.1	AT4G27780.1	I	5.70808	5.58745	5.51412	5.59444	5.44876	5.45265	5.82124	5.71632	5.68484	5.68502	5.93968	5.88176	5.54923	5.32372	5.33414	5.42243	5.29923	5.28452	5.47132	5.69331	5.56183	5.68224	5.5961	5.57018	5.44846	5.61214	5.70349	5.23527	5.42749	5.23592	5.33324	5.23904	5.10812	5.28551	5.05752	5.25184	5.16104	5.1104	4.98222	5.17984	5.28884	5.24634	5.15386	5.1035
OG0002779	Lthed_scf0050.1_g016870.1	Qgl_scf0040.1_g018390.1	AT1G70000.2	AT1G70000.2	II	6.00637	5.91005	6.2005	6.56855	5.9843	6.22592	6.28084	7.0552	7.50723	8.06562	7.61992	6.12271	5.06878	5.18496	6.23121	6.85553	6.17492	6.48422	5.96185	5.83485	6.6999	7.19161	7.55472	7.82575	7.48061	5.33874	5.12671	5.99977	5.66564	6.00446	5.28799	5.43627	5.131	5.91812	6.45322	7.89045	7.88547	7.44122	6.34127	5.59206	4.29308	5.13765	5.27023	6.53369
OG0002782	Lthed_scf0050.1_g014670.1	Qgl_scf0040.1_g016450.1	AT1G69830.1	AT1G69830.1	III	5.08382	4.58402	4.32618	4.41941	4.0458	4.31225	4.87769	5.27835	5.45811	5.77864	5.71827	4.56193	4.61653	4.43413	4.34846	4.67749	4.97624	4.42848	4.78096	4.91254	4.96726	5.5439	5.58801	5.5833	5.55547	4.4195	4.81819	4.90317	4.81493	4.16135	4.51642	4.32421	4.37756	5.20166	5.5737	5.89102	6.40258	6.25185	5.58419	4.87417	4.44363	4.80593	4.20758	4.00823
OG0002788	Lthed_scf0050.1_g031150.1	Qgl_scf0040.1_g038490.1	AT1G67420.2	AT1G67420.2	I	2.91415	2.35523	2.19692	2.61809	2.52885	2.21885	2.25239	3.02009	2.90899	2.30474	2.38242	2.71317	3.67117	3.5158	3.04758	2.36188	2.45325	2.40987	2.92522	2.58591	2.68808	2.41462	2.56003	2.35387	2.60952	3.25186	3.62166	3.27435	3.0955	2.90716	3.04385	2.7086	2.53883	2.72089	3.17139	3.19586	3.30115	3.3883	3.48242	3.42627	3.54568	3.12596	2.69581	2.73659
OG0002795	Lthed_scf0080.1_g006610.1	Qgl_scf0070.1_g109900.1	AT4G38470.2	AT4G38470.2	V	3.39612	3.45496	3.25301	3.84763	3.10713	3.4826	3.7133	4.19757	4.27496	4.16296	4.22101	4.64602	4.11804	3.96483	3.8234	3.84546	3.45672	3.13002	3.9921	4.10348	3.81692	4.16183	4.4434	4.90484	4.21404	4.55171	3.99957	3.93034	3.94356	4.28961	4.14439	4.36117	4.26964	4.48893	4.81725	4.96974	4.94172	4.81527	4.47591	4.3441	4.49697	4.43034	4.2678	4.23356
OG0002796	Lthed_scf0080.1_g011810.1	Qgl_scf0070.1_g103990.1	AT4G34960.1	AT4G34960.1	I	4.20724	4.00563	4.3823	3.93865	4.33359	4.37929	4.29939	4.3688	4.20403	4.45367	3.88032	4.60283	4.49047	4.58729	4.26917	4.09961	4.03605	4.35891	4.42497	4.30988	4.20219	4.10513	4.48968	3.89772	4.06922	4.59223	4.56789	3.94567	4.20462	4.25752	4.20917	4.1803	4.27412	4.06972	3.27966	3.34112	3.76963	3.97132	4.17542	3.95294	4.14492	3.80768	4.0807	4.14807
OG0002800	Lthed_scf0080.1_g019880.1	Qgl_scf0070.1_g092830.1	AT4G39120.1	AT4G39120.1	III	3.68467	3.40512	3.22011	3.66501	3.52734	2.78207	3.075	3.23511	2.40607	2.37942	2.81635	3.24908	3.83793	3.23042	3.13673	3.17509	3.02457	2.9352	3.52764	3.28876	3.2151	3.16131	2.76102	2.56123	2.76978	4.02429	3.5758	2.98513	2.97466	3.04771	2.77165	3.21683	2.75213	2.97524	2.65167	1.69178	1.81081	1.98622	3.11196	3.24318	3.33853	3.1895	2.89076	2.77112
OG0002801	Lthed_scf0080.1_g021330.1	Qgl_scf0070.1_g091310.1	AT2G21660.2	AT2G21660.2	IV	6.3901	7.31692	6.62831	11.2139	8.18496	8.85617	7.98417	10.7182	10.4741	10.7242	10.324	8.85877	7.15871	6.07003	7.45397	8.69426	8.25953	7.29422	10.423	9.3457	11.5647	11.0279	11.2372	11.0941	10.6504	10.6736	8.76594	9.47688	9.54628	9.41142	9.96763	9.63345	9.31287	10.4104	10.6716	10.8858	10.8801	9.93772	9.8081	11.0904	8.82093	9.28786	8.66844	10.2431
OG0002802	Lthed_scf0080.1_g022450.1	Qgl_scf0070.1_g089480.1	AT1G11760.1	AT1G11760.1	IV	5.04149	4.9266	5.45668	5.47444	5.39378	5.13872	5.38691	5.48799	5.4394	6.04162	5.88554	5.75472	5.58259	5.46722	5.03387	5.1998	5.74654	5.54466	5.67029	5.27042	5.64063	5.75608	5.9544	5.90796	5.58991	5.61433	5.13483	5.99317	5.88411	5.81385	5.81167	5.96034	5.93608	6.2462	6.45378	6.59552	6.35065	6.43389	6.07103	6.47974	6.0126	5.9915	5.57886	6.19876
OG0002805	Lthed_scf0080.1_g027980.1	Qgl_scf0070.1_g083020.1	AT2G15900.1	AT2G15900.1	IV	2.88878	2.80032	2.7815	2.78814	3.0077	2.76068	2.8101	2.95034	2.78607	3.09364	3.24123	2.66104	2.87134	2.98086	2.77397	3.0135	3.18433	3.13459	2.84812	2.84798	3.02867	2.93645	3.28659	3.39565	3.1647	2.79806	2.85648	2.91843	3.04832	3.00735	3.14658	3.02136	2.99115	3.07561	3.05274	3.23558	3.35145	3.03204	2.95647	2.77152	3.02988	2.99728	3.05708	3.15647
OG0002807	Lthed_scf0080.1_g030540.1	Qgl_scf0070.1_g079360.1	AT3G19130.1	AT3G19130.1	IV	6.70376	6.91422	7.02168	7.22823	7.43374	7.30744	7.41973	7.72148	8.00352	7.9254	7.67968	7.26433	7.0179	6.93891	7.06421	7.03086	7.32596	7.07113	7.43951	7.50552	8.05937	7.95249	8.43677	8.40512	8.05904	7.50551	7.00568	7.98018	7.50238	7.76084	8.14453	8.34929	8.77442	8.53576	8.70166	8.70705	8.28259	7.9565	7.98707	7.81367	7.32543	7.65826	8.06697	8.47022
OG0002809	Lthed_scf0080.1_g075900.1	Qgl_scf0070.1_g036380.1	AT2G01080.1	AT2G01080.1	I	5.51069	5.74875	5.61182	5.35087	5.6586	5.85714	5.29179	4.66333	4.83054	4.80395	4.78566	4.84765	5.8313	4.44738	5.46328	5.65231	5.62858	5.68306	5.4277	5.29721	4.73298	4.35156	4.82631	4.21884	4.93943	4.4637	5.5452	4.58389	4.80014	4.54368	4.53081	4.54167	4.15244	4.14587	2.93943	3.01144	3.98199	3.47824	3.94895	4.63492	4.87492	4.21947	4.12722	4.66268
OG0002811	Lthed_scf0080.1_g058890.1	Qgl_scf0070.1_g057070.1	AT2G14260.1	AT2G14260.1	III	5.04016	4.72168	4.69778	5.18839	4.9273	4.58903	5.3398	5.61281	5.72327	5.73898	5.1943	5.62691	5.25718	5.63809	5.4637	4.65159	4.51813	4.25553	5.10046	5.35537	5.28062	5.63232	5.67936	5.55466	5.40377	5.85961	5.26869	5.70131	5.81279	5.68927	5.87693	5.78824	5.95371	5.99694	6.11127	5.94495	5.87056	5.62507	5.84352	6.08047	5.88391	5.85508	5.7423	5.95683
OG0002812	Lthed_scf0080.1_g052690.1	Qgl_scf0070.1_g060790.1	AT4G08170.2	AT4G08170.2	III	2.68202	2.37056	2.0121	2.6257	2.21897	2.17127	2.21795	2.33072	1.92167	2.59723	2.32035	2.51177	1.70807	2.63117	2.21955	2.81144	2.66403	1.97471	2.37922	2.28198	2.16662	2.16712	2.65703	2.15468	2.29257	3.25733	2.80641	2.61658	2.98901	3.28544	3.31272	3.14493	3.1017	3.0417	3.44086	3.39081	2.96411	3.03706	3.09485	2.24943	2.98984	3.42246	3.54594	3.2463
OG0002813	Lthed_scf0080.1_g049080.1	Qgl_scf0070.1_g063170.1	AT4G33800.2	AT4G33800.2	I	0.89503	0.777151	2.702	2.31244	2.67168	2.9152	1.56567	0.816326	0.9556	0	0.211917	1.98364	2.51076	2.04376	0.993064	2.01441	1.5977	2.29605	1.42449	1.75596	0.304298	0.502776	0.373266	0.0996666	0.272671	3.13013	2.36237	3.35227	3.83067	4.37179	2.49856	2.55033	3.13764	1.72188	0.172217	0.318572	0	0.803829	2.95073	4.28891	3.51356	3.2385	2.0299	2.1536
OG0002814	Lthed_scf0080.1_g047440.1	Qgl_scf0070.1_g064750.1	AT2G14740.2	AT2G14740.2	III	5.68668	5.39924	5.5074	5.44896	5.46709	5.39328	5.59428	5.62402	5.67752	5.71688	5.69172	5.48971	5.62284	5.82744	5.59869	5.5134	5.67833	5.83213	5.54542	5.66036	5.67537	5.87137	5.90629	5.79858	5.68826	5.80562	5.6546	5.57966	5.57311	5.75895	5.78016	5.79632	5.80725	5.65581	5.79771	5.84391	6.06811	5.88749	5.52029	5.54475	5.65364	5.58839	5.60955	5.54229
OG0002820	Lthed_scf0090.1_g059480.1	Qgl_scf0060.1_g053130.1	AT1G21640.1	AT1G21640.1	II	3.5922	3.68633	4.44591	3.72278	4.0054	4.02018	3.88451	4.02995	4.18721	4.74048	4.07275	3.51167	4.25081	4.13844	4.25239	4.06504	4.65087	4.07227	3.72279	3.89686	3.73677	4.14785	5.23379	5.26149	4.2456	3.69104	3.99189	3.69927	3.61152	3.95899	3.9413	4.28145	4.37307	4.15476	4.23459	4.33582	4.69493	3.66813	4.03566	3.60226	4.37026	4.21414	4.57455	4.65891
OG0002821	Lthed_scf0010.1_g198450.1	Qgl_scf0020.1_g192070.1	AT5G11800.1	AT5G11800.1	I	3.83845	4.20371	3.98231	4.12108	4.12461	4.1541	4.532	4.21682	3.81596	4.11536	4.13558	4.09635	4.27082	4.17915	3.89031	4.09386	4.14446	4.15312	4.32089	4.13545	4.16953	3.88084	4.16085	3.93562	4.12493	4.08384	4.13609	4.31595	4.63148	4.35787	4.65652	4.47584	4.15658	4.01076	3.7511	3.60687	3.94699	4.24609	4.17623	4.42768	4.58124	4.38428	4.06082	4.18994
OG0002823	Lthed_scf0080.1_g027800.1	Qgl_scf0070.1_g083270.1	AT2G26500.2	AT2G26500.2	II	5.66584	5.18624	4.1201	5.71158	4.50934	4.37414	5.19316	5.33431	5.54922	6.35214	6.12636	6.12802	6.3183	4.32812	4.82534	4.75335	4.29414	3.97396	5.29673	5.56141	6.04742	6.32004	6.5337	6.97826	6.78524	6.38696	6.87385	5.46572	4.35816	4.01669	3.85012	3.65768	3.40622	4.34978	4.04448	4.48924	3.30447	3.422	4.98619	5.03178	4.89797	5.23102	3.81225	3.98052
OG0002826	Lthed_scf0030.1_g160480.1	Qgl_scf0010.1_g001270.1	AT2G44350.4	AT2G44350.4	III	5.219	5.0777	4.56669	4.96494	4.97458	4.82561	5.24303	6.04835	6.04979	5.61051	5.80837	5.75618	5.80284	5.01083	5.08505	4.94182	4.83394	4.88624	5.33403	5.41718	5.89393	6.05053	5.8399	6.06633	5.53748	5.91862	5.53528	5.24773	5.16875	5.11666	4.98387	5.10974	5.15218	5.68388	6.09806	6.19721	6.32147	5.98464	5.31615	5.59589	5.38011	5.20849	5.01038	4.67668
OG0002829	Lthed_scf0070.1_g041710.1	Qgl_scf0080.1_g035400.1	AT5G08130.7	AT5G08130.7	III	5.03582	4.34798	4.51525	3.83409	4.51665	3.95576	3.87711	4.28801	3.90616	3.57597	3.95268	4.2358	5.09119	4.61355	4.10489	4.81546	4.13722	4.41709	4.2478	4.21486	4.15539	3.76472	3.72154	4.06721	4.09213	3.95244	4.67096	4.82752	5.17147	4.28008	4.52323	4.25674	4.02767	4.17078	4.08599	4.13536	3.56748	5.3154	5.27789	4.60281	4.62663	4.90336	4.15221	3.99007
OG0002834	Lthed_scf0070.1_g055790.1	Qgl_scf0080.1_g048670.1	AT1G73660.1	AT1G73660.1	IV	3.53865	3.80639	3.59493	4.226	3.79449	3.91695	3.84268	4.5207	4.1568	4.02016	4.10482	3.56827	3.95403	3.74411	4.00206	3.84894	3.67554	3.73402	4.04776	3.88617	4.56622	4.06265	4.30097	4.20371	4.29434	4.11778	3.99185	4.09358	3.77262	3.84467	4.16299	3.91773	3.49747	3.97548	3.79347	3.59205	3.64766	3.4039	3.96892	3.91814	3.64174	3.89705	3.67669	4.14448
OG0002835	Lthed_scf0090.1_g078700.1	Qgl_scf0060.1_g033590.1	AT3G58130.2	AT3G58130.2	V	2.99727	2.53865	1.74159	3.69848	2.7589	2.79034	3.34148	3.11642	3.33937	3.8689	3.95289	3.33458	2.99446	2.93877	2.98035	2.86526	2.69871	2.521	3.05952	2.74834	2.84102	3.30328	3.34584	2.90202	3.31596	2.95054	2.54375	3.33104	2.85321	2.76492	2.73001	3.04474	2.81625	3.21133	2.92138	2.93716	3.35693	3.14928	2.74942	2.90232	3.08512	2.87679	2.58002	3.22454
OG0002844	Lthed_scf0030.1_g142430.1	Qgl_scf0010.1_g028950.1	AT3G08550.1	AT3G08550.1	I	5.20565	5.28807	4.71156	4.96915	4.76341	4.8082	5.02801	4.69126	4.36441	4.43422	4.67197	4.69421	5.47316	5.21202	4.97935	4.83067	4.54028	4.87259	5.11584	4.98846	4.25499	4.45955	4.21156	3.73233	4.54314	4.89071	5.27977	4.98085	5.28383	5.07702	5.11049	5.17903	5.0052	4.79659	4.6475	4.35581	4.68209	4.65187	4.56331	5.24684	5.42621	5.20073	4.78284	4.84599
OG0002845	Lthed_scf0030.1_g142090.1	Qgl_scf0010.1_g029320.1	AT4G30870.1	AT4G30870.1	III	1.38506	0.807789	1.36866	1.42906	1.23387	1.16878	1.30197	1.32096	0.877291	1.37887	1.7894	1.85113	1.21044	1.36134	0.97466	1.17331	0.973961	1.25041	1.17357	1.09319	1.11169	1.32775	1.1893	1.49709	1.56936	1.78416	1.18508	1.57038	1.61406	1.77828	1.46324	1.81187	1.56932	1.48082	1.43226	1.52743	1.56875	1.42234	1.47539	1.61438	1.47075	1.59787	1.549	1.24375
OG0002847	Lthed_scf0030.1_g139810.1	Qgl_scf0010.1_g033620.1	AT5G13480.1	AT5G13480.1	III	3.62296	3.7389	3.46472	3.92311	3.68195	3.25207	3.78491	4.17558	4.27083	4.32928	4.52031	4.20099	3.72907	3.70096	3.37189	3.67679	3.31076	3.40765	3.98857	3.69243	4.03932	4.14689	4.31143	4.1586	4.34256	4.37991	3.4047	4.32284	4.11279	3.86326	4.04568	3.8899	3.48112	4.19934	4.3061	4.33689	4.47347	4.4629	4.57232	4.3693	4.07875	4.10873	3.79049	3.67215
OG0002853	Lthed_scf0030.1_g100490.1	Qgl_scf0010.1_g080140.1	AT4G00170.1	AT4G00170.1	I	6.25682	6.1977	5.82428	6.24455	5.91599	5.70595	5.87628	5.34089	5.18722	5.05142	5.21293	6.08198	5.99799	6.26005	5.95253	6.01307	5.59865	6.03291	5.99113	5.75654	5.42937	5.22335	4.95768	5.18489	5.3935	6.31744	6.00296	5.92352	6.13495	6.28787	5.93603	6.07807	5.9793	5.50158	5.17161	5.19001	5.23668	5.47488	5.64891	6.14595	6.31821	6.18171	5.95412	5.9402
OG0002855	Lthed_scf0030.1_g096900.1	Qgl_scf0010.1_g085600.1	NA	NA	V	0.363507	1.19203	0	1.60583	1.9694	1.26432	0	0.383349	0.248386	0.450456	0	0.373497	0.825207	0.691423	2.28868	1.53353	0.977039	0.220053	0	1.03816	0.0694474	0.0830561	0.319595	0	0.872808	0.382346	0.140111	0.260797	0.421254	0.0785935	0.23001	0.266462	0.0774466	0.277969	0.093777	0.103517	0	0.495632	1.08514	0	0	0.493236	0.616561	0.147483
OG0002857	Lthed_scf0030.1_g086730.1	Qgl_scf0010.1_g100010.1	AT5G04800.4	AT5G04800.4	I	8.74527	9.04753	9.08485	9.05388	9.32833	8.93771	9.24474	8.78103	8.76544	8.5472	8.36589	9.52681	8.95818	8.81377	8.83759	8.51424	9.05943	9.03573	8.75358	8.70695	8.72265	8.74095	8.79712	8.50408	8.7011	9.27632	8.70288	9.13752	9.01288	9.06084	8.98678	9.04211	9.01814	8.8516	8.51065	8.39766	8.09388	8.11974	8.51538	9.43124	9.03307	8.66483	8.66858	8.96042
OG0002863	Lthed_scf0090.1_g088270.1	Qgl_scf0060.1_g019010.1	AT3G07400.1	AT3G07400.1	III	2.90283	2.277	2.80758	2.60846	2.58215	2.99392	2.91607	2.78799	2.69959	2.64556	2.87322	2.73918	2.7637	3.05697	3.03373	2.96387	3.15347	2.94326	2.86616	2.85163	2.90436	2.99916	2.98985	3.18733	2.87822	2.92564	2.83422	2.86297	3.13447	3.15738	3.22732	3.36366	3.13175	3.12475	3.03768	3.02253	3.55161	2.95765	2.9788	3.14547	3.31832	3.13813	3.29592	3.16214
OG0002868	Lthed_scf0060.1_g074050.1	Qgl_scf0090.1_g044690.1	AT3G11170.1	AT5G05580.1	I	3.2815	3.3316	1.17488	3.19942	2.67993	2.72211	5.59194	6.74383	6.26218	5.88882	6.34944	6.21165	4.68054	3.49424	2.1838	2.18605	1.20604	2.50655	5.13904	5.4408	6.17898	5.82376	5.22266	5.73453	5.10404	5.25793	3.57015	3.84114	3.5716	2.97784	2.44404	2.46216	2.61961	3.02985	2.58925	2.05886	3.58869	5.07393	4.82496	5.08847	4.14948	4.00839	2.46562	2.33962
OG0002872	Lthed_scf0060.1_g055920.1	Qgl_scf0090.1_g064360.1	AT1G07420.1	AT1G07420.1	I	4.58137	4.93329	4.04572	4.47989	3.65859	4.42222	4.82308	4.13261	4.06709	3.74787	3.51044	4.616	4.69552	4.30837	3.96505	4.46983	4.47284	4.56668	4.86272	4.72631	3.85348	3.88499	3.38973	2.63923	4.24597	4.98782	4.46773	4.12057	3.90673	4.14314	3.84181	3.90704	3.49814	3.43403	2.9827	2.80625	2.70389	3.20639	3.59682	4.48013	4.08759	3.82068	3.25299	3.67432
OG0002875	Lthed_scf0060.1_g065450.1	Qgl_scf0090.1_g053610.1	AT2G28630.2	AT2G28630.2	I	2.79108	2.72595	3.08641	3.4266	3.03445	3.40178	3.16432	2.17166	1.17195	1.78714	2.76745	3.79306	3.31912	2.17786	0.272385	3.22538	3.08475	3.40472	4.01937	3.50776	2.39931	1.34669	1.15217	0.995545	2.61874	3.95633	2.99862	2.7188	3.77825	4.56385	3.94281	3.30018	4.31419	1.87424	1.21964	0.639855	0.962865	0.776561	2.20019	2.99396	3.89089	2.82238	2.6307	2.34659
OG0002876	Lthed_scf0060.1_g065650.1	Qgl_scf0090.1_g053270.1	AT1G07705.2	AT1G07705.2	III	5.49211	5.51483	5.52486	5.46467	5.58354	5.43941	5.38894	5.03063	5.22267	5.12834	5.15165	5.61321	5.50351	5.57734	5.40161	5.51417	5.48936	5.33838	5.49266	5.53553	5.49627	5.27629	5.13396	5.5583	5.17746	5.61737	5.35693	5.62774	5.73146	5.77262	5.85585	5.77887	5.60965	5.67498	5.64451	5.71863	5.56712	5.45184	5.79195	5.73702	5.80951	5.67512	5.75703	5.63355
OG0002877	Lthed_scf0060.1_g069760.1	Qgl_scf0090.1_g049530.1	AT3G07630.3	AT3G07630.3	V	3.74522	3.3629	3.85346	4.27601	3.89923	3.68049	4.22208	4.79612	5.32052	4.65864	4.88176	4.8995	4.19563	3.61079	3.74823	3.96389	3.76006	3.67291	4.16384	4.28476	4.2763	4.47292	5.01098	4.3178	4.37393	4.502	3.77633	4.20121	3.94217	3.89615	4.08098	4.05405	4.11252	4.63247	4.22934	4.2397	4.1668	4.11629	4.55329	4.15078	4.13186	4.33329	3.9959	3.91182
OG0002880	Lthed_scf0060.1_g019100.1	Qgl_scf0090.1_g103430.1	AT5G21160.1	AT5G21160.1	III	4.57933	4.38061	4.29407	4.20199	4.49494	4.39212	4.7077	5.02115	5.24892	5.28355	5.322	4.84868	4.50298	4.52266	4.5746	4.50347	4.69918	4.50973	4.49792	4.77256	4.95197	5.20822	5.57678	5.23429	5.07812	4.74045	4.38978	4.71155	4.58755	4.64011	4.94794	4.84331	4.88587	5.1016	5.46177	5.38522	5.25718	5.20906	5.21485	4.847	4.52372	4.69039	4.90306	4.76005
OG0002884	Lthed_scf0060.1_g026120.1	Qgl_scf0040.1_g041860.1	AT1G08190.1	AT1G08190.1	IV	4.14739	3.93482	3.64205	4.24856	3.96166	3.98267	4.36162	4.87418	5.2395	5.20251	5.11674	4.39715	4.32284	4.57903	4.0054	4.2493	4.30477	3.96974	4.60449	4.66493	5.17496	5.23237	5.64541	5.70315	4.90141	4.52401	4.25274	4.14535	4.30144	4.31292	4.4626	4.31307	4.32109	4.53218	5.08816	5.40909	5.76414	5.55731	5.17178	4.40759	4.17286	4.16232	4.24144	4.11192
OG0002887	Lthed_scf0060.1_g015860.1	Qgl_scf0090.1_g105960.1	AT4G12070.1	AT4G12070.1	IV	4.62627	4.97936	5.36237	4.60555	5.2637	4.82802	4.65272	4.35975	4.63988	5.13811	4.82943	3.37481	4.02273	4.88271	5.27101	5.16312	5.56898	5.00438	4.1316	4.33294	3.89739	4.72902	4.64726	4.87447	4.20243	2.55272	3.97876	4.55188	4.45115	4.45338	4.72611	4.81128	4.9151	5.31283	5.28247	5.58204	5.44347	4.68551	4.52129	3.51101	3.66346	4.59752	5.02566	5.57887
OG0002898	Lthed_scf0050.1_g094820.1	Qgl_scf0040.1_g105130.1	AT2G47300.4	AT2G47300.2	III	2.55467	2.66717	2.87832	2.1447	2.35532	2.50785	2.45119	2.1128	2.35324	2.3201	2.33825	2.54123	1.93187	1.87586	2.01581	2.29505	2.70511	2.73698	1.87343	2.13274	2.23702	2.04252	1.79056	2.07984	2.08538	2.19426	1.48116	1.85868	1.75186	2.00517	2.2539	2.08194	1.93372	1.95501	1.55665	1.86439	1.90627	2.21986	2.49956	2.16562	1.48125	1.33517	1.67294	1.55605
OG0002906	Lthed_scf0010.1_g001740.1	Qgl_scf0020.1_g003520.1	AT4G24270.1	AT4G24270.2	IV	4.17162	4.43593	4.3679	4.25169	4.33259	4.54736	4.74791	4.4672	4.59784	4.9843	4.87586	4.7389	4.34448	4.41585	4.23977	4.44425	4.90658	4.59088	4.71337	4.71513	4.58088	4.78696	4.63279	4.58453	4.97201	4.60909	4.27233	4.51733	4.51441	4.54152	4.6898	4.67942	4.64346	4.68417	4.80885	4.8369	4.69475	4.57822	4.55898	4.73891	4.55687	4.4618	4.56018	4.62057
OG0002908	Lthed_scf0040.1_g050660.1	Qgl_scf0050.1_g088160.1	AT5G38520.1	AT5G38520.1	II	2.0211	1.92505	1.57912	1.98645	1.20997	1.6038	1.94255	3.05329	3.17546	3.48981	3.6872	2.36876	2.76206	1.8814	1.70955	1.60498	1.96623	1.12564	2.16986	1.96669	2.25435	2.9606	3.34374	3.07315	3.5312	2.41859	2.71856	2.39966	2.29144	1.94906	2.42909	2.14117	1.93362	3.42775	3.16211	3.04425	2.58658	3.0424	3.7668	2.9035	3.02313	3.37666	2.32935	1.91668
OG0002920	Lthed_scf0090.1_g046240.1	Qgl_scf0060.1_g067030.1	AT1G54130.1	AT1G54130.1	II	2.80035	2.42538	2.59305	2.7072	2.13787	2.48813	2.3558	3.29242	3.32206	3.0667	3.57724	3.16	3.08906	3.13031	2.53482	2.6126	2.5804	2.63889	2.67364	2.52037	3.03282	2.79558	2.72665	2.54725	3.2065	3.26672	3.16884	2.80521	2.97164	2.57658	2.86149	2.62057	2.13597	3.16707	3.05112	2.88181	2.86625	3.30397	3.86459	3.18913	3.17865	3.58884	2.7057	2.43911
OG0002924	Lthed_scf0090.1_g023660.1	Qgl_scf0060.1_g089760.1	AT4G25640.1	AT4G25640.1	V	4.84297	4.7272	3.55427	5.06986	4.20363	4.41055	5.2092	5.78354	5.53242	5.17188	4.96826	4.95891	5.89955	4.37194	3.75577	4.94366	4.65198	4.55169	5.41982	5.29715	5.30888	5.23261	4.90114	4.61303	4.81927	5.33675	5.73864	4.26797	4.62518	4.46065	4.16288	4.27013	4.44156	3.82694	4.02293	3.57228	3.31386	3.84149	3.98232	4.27085	4.56699	4.59759	4.10078	4.14833
OG0002928	Lthed_scf0100.1_g086980.1	Qgl_scf0100.1_g017800.1	AT3G50810.3	AT3G50810.3	III	3.28647	2.76472	1.83143	2.18434	1.5435	3.05572	2.31381	2.67942	1.86778	2.07747	1.92626	2.06667	1.85775	3.06787	2.81827	2.32331	1.41592	2.34778	2.5897	2.60555	2.55842	2.52465	1.69885	1.99221	1.89889	2.4044	2.96528	2.91174	3.2486	2.80802	2.09963	2.81773	2.42217	2.59881	1.96293	2.49365	2.59907	2.95308	2.36267	2.70932	2.50598	2.39818	1.85967	2.52058
OG0002931	Lthed_scf0040.1_g032970.1	Qgl_scf0050.1_g104650.1	AT1G01820.1	AT1G01820.1	IV	7.08367	7.1134	7.19929	7.10961	7.07544	6.99654	7.13696	7.30245	7.68141	7.67158	7.36837	7.04674	6.78044	6.8121	7.20097	6.96382	7.28638	7.05264	6.97548	7.11613	7.30751	7.62412	7.82869	7.91578	7.53499	7.15093	6.80981	7.37172	7.16716	7.22249	7.37267	7.35006	7.40749	7.58431	7.8049	7.96048	8.0668	7.91314	7.73501	7.20824	6.96967	7.2284	7.34146	7.54812
OG0002932	Lthed_scf0040.1_g034110.1	Qgl_scf0050.1_g103850.1	AT4G00550.2	AT4G00550.2	III	4.3234	4.04603	4.75003	4.20723	4.33257	4.29245	4.37321	4.4917	4.21998	4.34017	4.3239	3.78263	4.3434	4.14848	4.16715	4.51679	4.33533	4.41087	4.31002	4.43701	4.652	4.22823	4.52607	4.61369	4.21653	4.1875	4.29741	4.27512	4.46123	4.74796	4.77492	4.52887	4.78615	4.49189	4.64089	4.71766	4.83811	4.74669	4.54768	4.35637	4.45594	4.44638	4.6917	4.91748
OG0002937	Lthed_scf0040.1_g048090.1	Qgl_scf0050.1_g089270.1	AT1G07650.1	AT1G07650.1	III	0.342152	0.452768	0.321329	1.24065	0.477193	0.256953	0.677786	1.44804	1.8446	1.70703	1.62994	0.944759	1.03732	1.08053	0.739626	0.600675	0.384378	0.474229	0.910435	0.94158	0.904287	1.55497	1.66918	1.48673	1.29368	1.06461	1.11144	2.61958	1.60108	1.50686	0.995685	1.42819	1.05259	1.40225	2.06142	2.33899	3.44761	2.72569	1.90068	1.86949	1.79196	1.64163	1.79635	1.90234
OG0002939	Lthed_scf0070.1_g092830.1	Qgl_scf0080.1_g086270.1	AT3G59470.2	AT3G59470.2	IV	3.15699	3.14693	3.26161	2.778	3.23524	3.28335	2.72741	3.63971	3.50418	3.70558	3.766	2.5774	3.32132	3.13118	3.20185	3.3113	3.44711	3.67923	3.21186	3.24844	3.50643	3.62409	3.836	4.39261	3.60693	3.00038	3.21039	3.7296	3.15356	3.3326	3.17698	3.10701	3.41618	3.79677	4.69384	4.90362	4.71007	4.75261	3.85897	3.21259	3.38037	3.66577	3.51555	3.45581
OG0002940	Lthed_scf0070.1_g090560.1	Qgl_scf0080.1_g084020.1	AT2G31450.1	AT2G31450.1	II	3.28567	2.86825	3.02379	2.84941	3.20338	3.39047	3.27309	3.12936	2.79726	2.57453	3.23089	3.7377	3.4143	2.85267	3.29742	2.98575	2.91166	2.7237	3.32708	3.49843	3.36156	3.30301	3.27922	2.85575	3.15745	3.52409	3.26776	2.87297	3.1209	2.99124	2.75485	3.19326	2.88317	3.00788	2.72128	2.08916	2.11093	2.2852	3.15475	3.22175	3.33157	3.18777	2.86928	3.06864
OG0002941	Lthed_scf0100.1_g046420.1	Qgl_scf0100.1_g060060.1	AT5G48820.1	AT5G48820.1	III	4.18	3.90219	5.12798	4.64934	4.53968	4.15209	4.53754	5.01734	5.33176	5.88658	5.44169	4.34971	4.16501	3.88115	4.83727	4.88464	4.58893	4.6769	4.50632	4.63325	5.35602	5.7689	6.66118	6.01687	5.61441	4.82667	4.12989	4.22423	4.18323	4.24069	4.3659	4.24122	4.16311	4.66178	5.27158	5.36831	5.82352	5.79661	5.06203	3.93883	3.75945	4.06836	4.57684	4.58681
OG0002942	Lthed_scf0100.1_g044630.1	Qgl_scf0100.1_g063320.1	AT1G04760.2	AT1G04760.2	I	7.39131	6.99943	7.0944	7.10823	7.33409	7.04459	7.088	6.52481	6.39335	6.39216	6.09586	7.17871	7.11809	7.43476	7.4733	7.21689	6.98195	7.31095	7.02821	6.90274	6.55472	6.60223	6.13298	7.05954	6.34099	6.7368	7.04702	6.996	7.30999	7.305	7.25799	7.3887	7.2825	6.77773	6.88513	6.974	6.7308	6.57251	5.83415	6.97053	7.15726	6.79768	7.01162	7.21669
OG0002945	Lthed_scf0100.1_g023390.1	Qgl_scf0100.1_g084060.1	AT4G16260.1	AT4G16260.1	IV	0.73477	0.308737	0	0.458095	0.919448	1.36772	0.608692	2.33666	3.46722	4.1806	3.67192	1.94896	2.5682	1.1759	3.45285	0.809889	2.20708	1.39788	1.28667	2.28249	2.98187	3.74471	4.13495	3.62662	4.45267	4.64692	3.17045	4.79216	3.48547	4.00852	3.42952	4.25577	5.13481	3.10066	4.55007	5.03166	6.10742	4.18286	4.20419	5.61443	3.37325	3.45928	3.79941	3.40201
OG0002948	Lthed_scf0100.1_g012140.1	Qgl_scf0100.1_g093010.1	AT3G06350.1	AT3G06350.1	II	5.95248	5.37755	4.48765	5.48383	4.91271	4.68243	5.0968	4.90941	4.23173	4.34664	4.20354	5.3582	5.48925	5.79934	5.01625	5.23394	4.46649	4.37806	5.33591	5.27148	3.96524	4.51024	3.66922	3.63496	4.0795	4.98692	6.45961	5.50216	6.0676	5.84705	5.24974	5.4625	5.2969	5.32244	5.29315	5.24005	5.10827	5.09556	4.351	5.65471	6.00988	6.00513	5.56239	5.07022
OG0002956	Lthed_scf0100.1_g035850.1	Qgl_scf0100.1_g071630.1	AT2G33470.2	AT2G33470.2	I	6.21192	5.59037	5.33978	6.23276	5.45718	5.54267	6.03043	6.45672	6.26039	5.84908	5.70522	6.83714	6.50018	6.31765	6.12718	5.86145	5.46714	5.545	6.06465	6.15428	6.20109	6.03372	5.7322	6.80446	6.0958	7.00865	6.50534	6.19497	6.27584	6.30115	5.98522	6.12615	6.05197	5.93608	6.39949	6.94281	6.20217	6.52676	5.93371	6.77817	6.3549	5.78989	5.72109	5.80747
OG0002961	Lthed_scf0100.1_g002070.1	Qgl_scf0100.1_g103340.1	AT4G14720.1	AT4G14720.1	I	3.08386	3.16626	3.0995	3.01995	3.4189	3.04025	3.36766	2.62362	3.09056	3.40652	3.43686	3.2037	2.76336	2.91265	3.03835	3.4737	3.52927	2.96429	3.31645	3.24288	3.54921	3.19759	3.48893	2.39406	3.48467	2.6935	2.92371	2.90133	3.31582	3.27393	3.5066	3.48177	3.17933	3.32493	3.10702	2.69855	2.91545	3.28155	3.46008	3.00022	3.32912	2.95797	3.45565	3.06256
OG0002964	Lthed_scf0020.1_g183390.1	Qgl_scf0030.1_g001360.1	AT1G78895.1	AT1G78895.1	III	4.1541	4.29823	4.57207	3.30872	4.09304	4.25289	3.91949	4.04876	4.38102	3.99436	4.06806	4.33951	3.96113	4.44428	4.20517	3.89881	4.63128	4.30008	3.5538	4.14896	3.4603	3.82594	4.08099	3.78519	3.9141	3.77642	3.8215	4.43964	3.94918	4.17649	4.43717	4.22105	3.84855	4.4913	4.10096	4.5309	5.12594	4.69781	4.21761	4.12228	4.45191	3.84427	3.95283	4.02028
OG0002966	Lthed_scf0020.1_g005070.1	Qgl_scf0030.1_g185320.1	AT1G17350.5	AT1G17350.5	III	4.11681	3.56047	4.23976	4.06894	4.25689	4.44481	4.12287	3.84299	4.01748	3.28825	3.35234	4.47611	3.92922	3.91418	3.71692	3.83803	4.08103	3.93656	4.10678	3.7891	3.57154	3.48509	3.03622	3.33154	3.27843	4.42392	3.54409	3.65764	3.73127	3.65191	3.39662	3.85023	3.61299	3.57755	3.3965	3.25021	3.18173	3.35883	4.0309	3.75886	3.76834	3.21365	3.41347	3.68471
OG0002967	Lthed_scf0020.1_g005180.1	Qgl_scf0030.1_g185260.1	AT3G14200.1	AT3G14200.1	III	4.58082	5.38849	5.74233	6.24648	6.6736	6.70763	6.64632	7.13809	7.80388	7.5442	6.80957	4.56279	3.88424	4.7578	5.94588	5.45706	5.90717	6.91918	6.6822	7.03324	7.41011	7.68118	8.36736	8.35404	6.48127	5.13717	4.68521	5.39084	5.67952	6.60383	7.46327	7.53939	7.60544	8.12723	8.54838	8.68628	8.52322	8.33957	8.20754	5.45216	4.55076	5.22178	6.57869	7.3405
OG0002970	Lthed_scf0110.1_g011010.1	Qgl_scf0110.1_g074790.1	AT1G52630.1	AT1G52630.1	V	2.99068	2.44885	2.0748	2.56954	2.67099	2.901	2.63259	2.91839	3.22347	3.08353	3.0745	2.72596	2.53254	2.67694	2.44911	2.75545	2.82925	2.67448	2.76957	2.66212	2.98381	2.51128	2.96825	3.04997	3.02012	2.96294	2.35255	2.81173	2.68522	2.74906	2.62911	3.06078	2.74686	2.9203	2.91607	3.3481	3.04136	3.16953	3.37372	3.0328	2.86908	2.9186	2.91472	2.81326
OG0002975	Lthed_scf0020.1_g074850.1	Qgl_scf0030.1_g107760.1	AT5G48930.1	AT5G48930.1	I	6.08555	6.03868	5.69954	6.03761	5.70121	5.76411	5.75733	6.47533	6.00556	5.21523	4.53392	4.82267	5.97228	5.70799	5.72788	5.47596	4.87901	5.56407	5.95072	5.98278	5.84402	5.80206	5.30785	5.74163	4.80606	6.04867	6.27477	5.36686	5.96755	5.99734	5.55924	5.41693	5.99135	5.58781	6.34358	5.83951	5.51289	4.75524	3.89274	4.84955	5.85154	6.08917	5.40909	5.34702
OG0002978	Lthed_scf0040.1_g029500.1	Qgl_scf0050.1_g108070.1	AT4G12080.1	AT4G12080.1	I	6.56805	6.4444	6.36883	6.63588	6.42798	6.44878	6.39896	5.42638	5.35392	5.4919	5.74017	6.66063	6.31152	6.0131	6.20194	6.51238	6.4317	6.47571	6.45617	6.22683	5.42204	5.68766	5.40429	4.72583	5.80548	6.33388	6.35813	6.59754	6.80851	6.65789	6.36962	6.47272	5.97842	5.67939	5.23986	5.44222	5.59398	5.19941	4.87944	6.43648	6.57563	6.21486	6.01207	6.53549
OG0002980	Lthed_scf0040.1_g023240.1	Qgl_scf0050.1_g113670.1	AT3G54820.1	AT3G54820.1	II	4.81589	4.65107	4.92873	5.28614	5.33732	6.14739	6.93819	5.26553	3.63723	2.65951	5.21093	6.70925	5.34988	4.30443	3.8626	4.03201	4.30559	5.2498	6.39613	5.6458	5.79996	4.09155	3.233	3.1231	5.22933	5.97656	5.0146	4.95512	4.63174	5.28623	4.73024	4.5976	5.06188	3.87321	4.19278	3.98559	3.6606	4.26319	4.42523	5.49396	4.86405	4.35218	3.93171	4.3917
OG0002982	Lthed_scf0040.1_g016800.1	Qgl_scf0050.1_g119270.1	AT5G02530.1	AT5G59950.3	V	5.96169	5.85927	5.94122	5.97584	5.90879	5.96933	5.95261	5.91149	6.05644	5.86684	6.07158	6.78856	5.62838	5.63211	5.82799	5.87523	6.20411	6.17007	5.97485	5.77258	6.18614	5.96229	6.01071	6.11632	6.10471	6.40533	5.61493	5.77132	5.815	5.82878	5.75041	5.85434	5.94426	5.83933	5.90694	5.95743	6.12633	6.16578	6.16132	6.32397	5.62141	5.73282	5.55683	5.71765
OG0002984	Lthed_scf0040.1_g010980.1	Qgl_scf0050.1_g123860.1	AT2G39805.1	AT2G39805.1	V	5.1777	5.24324	5.49078	4.89164	5.00133	4.95788	5.47717	4.89241	5.19679	5.49737	5.52776	4.9157	5.16127	5.25988	5.05342	5.15011	5.23245	5.14067	5.13707	4.99941	5.00461	5.21127	5.12187	5.22358	5.31142	4.82485	4.82291	5.22799	5.06965	4.88969	5.21921	5.26427	5.33041	5.42969	5.2357	5.15049	5.75919	5.54982	5.23152	5.18705	4.91986	5.00439	4.98802	5.47293
OG0002985	Lthed_scf0040.1_g008950.1	Qgl_scf0050.1_g125610.1	AT2G39950.1	AT2G39950.1	II	6.27689	6.69019	6.94445	6.56969	6.83836	6.67566	6.63227	6.20132	5.97709	5.94045	5.7743	5.54328	5.76043	6.66295	6.77818	6.36226	6.7284	6.71102	6.04369	6.1262	5.88078	5.79282	5.91631	6.20092	5.77795	5.64239	6.05212	6.09212	6.25827	6.16557	6.69892	6.81292	6.64106	6.64729	5.69344	5.99081	6.19112	5.58987	6.28036	6.02846	6.2863	6.25504	6.92436	7.09467
OG0002986	Lthed_scf0040.1_g007060.1	Qgl_scf0050.1_g126680.1	AT3G51880.2	AT3G51880.2	IV	6.79912	6.55941	6.39599	6.63621	7.41104	6.8939	7.79749	8.88102	9.40422	9.46073	9.32452	6.87318	6.39385	7.30077	7.07577	7.02037	7.05688	6.5841	7.47813	8.07518	9.21161	9.48723	9.7622	9.73568	9.01405	6.13373	6.44754	7.86018	7.72119	6.83993	7.86074	8.04846	8.58715	9.34136	9.96789	9.9299	9.93146	9.82059	9.25003	7.75459	7.07927	8.29963	7.97935	8.10889
OG0002987	Lthed_scf0050.1_g095080.1	Qgl_scf0040.1_g105210.1	AT5G27970.3	AT5G27970.3	IV	2.83897	3.13828	2.9098	3.07797	2.93204	2.90286	2.94754	3.44895	3.58732	3.85957	3.57949	3.04059	2.80687	3.01781	2.8349	3.03897	3.03067	2.85647	3.26825	3.0055	3.49198	3.61512	3.77065	3.89903	3.55198	2.99738	2.59433	2.87209	3.11462	3.18902	3.36767	3.57942	3.37045	3.82931	4.22247	4.20121	4.42571	3.9739	3.73398	3.00063	3.24968	3.23492	3.45424	3.28948
OG0002990	Lthed_scf0050.1_g103770.1	Qgl_scf0040.1_g123790.1	AT3G05500.1	AT3G05500.1	V	5.47309	5.46456	5.81453	6.6094	7.12605	6.20845	5.08794	5.31265	6.45153	5.48009	5.47252	5.31234	4.63274	6.68404	8.19963	6.50256	5.72724	5.45592	4.57752	5.67534	5.34049	5.51949	6.0289	5.84324	5.98893	4.80269	5.08282	4.88151	5.13638	5.34436	5.17674	5.30666	5.26596	5.62767	7.21816	7.39519	6.81024	7.44556	5.77734	4.95601	4.90629	4.95886	5.92462	5.14624
OG0002992	Lthed_scf0100.1_g077490.1	Qgl_scf0100.1_g036490.1	AT3G11220.1	AT3G11220.1	IV	3.14147	3.52278	3.74381	3.2565	3.11509	3.31335	3.68698	3.56201	4.10848	4.19439	4.43083	4.07976	3.46597	2.98375	3.33257	3.34358	3.74588	3.34825	3.71744	3.34546	3.77323	4.08621	4.00041	4.20549	4.50255	3.98815	3.20258	3.10511	2.8273	2.90698	2.92315	3.18111	3.20316	3.52593	4.06429	3.90798	3.79084	4.07995	4.41465	3.42214	2.81661	2.95149	3.14986	3.41469
OG0002996	Lthed_scf0060.1_g129620.1	Qgl_scf0090.1_g003610.1	AT1G65540.3	AT1G65540.3	IV	4.42456	4.37007	4.28792	4.43267	4.33144	4.24178	4.83943	5.15676	5.0393	4.69247	4.70816	5.18888	4.79145	4.58127	4.43485	4.61096	4.6343	4.35048	4.90924	5.14057	5.16989	5.35782	5.29693	5.22468	5.0898	5.11803	4.76897	4.40814	4.34994	4.06802	4.38751	4.24951	4.37528	5.05224	5.36089	5.3215	5.14604	5.03404	4.79858	4.63345	4.56059	4.44196	4.01495	4.06558
OG0002999	Lthed_scf0120.1_g047840.1	Qgl_scf0120.1_g043590.1	AT2G48060.2	AT2G48060.2	IV	2.42099	2.60874	2.68148	2.45948	2.46798	2.61096	2.89556	3.19434	3.15468	3.37783	3.25113	2.26188	2.39355	2.66511	2.56956	2.86356	2.90548	2.78089	2.97483	2.67945	3.39457	3.30518	3.34306	3.54489	3.15583	2.41339	2.41859	2.61902	2.68463	2.66615	2.87214	2.79078	2.73861	3.00391	3.39196	3.60327	3.79766	3.44672	3.28961	2.51736	2.45568	2.70697	2.85677	2.84448
OG0003001	Lthed_scf0120.1_g057910.1	Qgl_scf0120.1_g051620.1	AT2G47580.1	AT2G47580.1	III	5.0876	4.98833	4.5389	4.96598	4.66653	4.38094	4.99741	4.73208	5.02296	4.66339	5.02025	5.52253	4.97344	5.04118	4.46262	4.9557	4.70558	4.88509	5.17564	5.00092	5.26794	5.08088	4.82478	5.034	5.00621	5.44365	5.14034	5.01585	5.23495	5.20715	5.25271	5.18873	5.17274	4.99128	4.99709	4.97726	4.94955	5.03802	5.25021	5.2756	5.10052	5.0991	5.3287	4.9047
OG0003008	Lthed_scf0010.1_g167360.1	Qgl_scf0020.1_g144370.1	AT1G76570.1	AT1G76570.1	II	3.46871	3.59922	3.40002	2.98461	3.03796	2.82636	2.83539	2.77947	2.95221	3.31591	3.2522	3.3408	3.40353	3.62691	2.67017	2.75127	3.07999	2.55154	2.62913	2.47262	2.97786	2.88637	3.09658	2.96866	3.69539	2.95493	3.23796	3.4414	3.0323	2.72853	3.04216	3.30654	2.78336	3.33653	3.01156	2.94399	3.13814	2.49503	3.39314	3.53659	3.89285	3.60631	3.26476	3.17755
OG0003010	Lthed_scf0010.1_g168160.1	Qgl_scf0020.1_g164120.1	AT2G33620.4	AT2G33620.4	IV	5.75572	5.69791	5.4666	6.0217	6.07121	5.70646	6.23693	5.91851	6.22336	6.00537	5.81355	5.97418	5.70996	5.42092	5.59975	5.58426	5.44189	5.48912	5.85724	6.07111	6.35362	6.23052	6.04427	6.40467	5.6797	5.78097	5.811	4.75327	5.02339	5.16086	5.05984	5.36479	5.18016	4.98136	5.31161	5.65255	5.70633	5.22966	4.52535	4.74966	4.74413	4.25035	4.80106	5.06415
OG0003011	Lthed_scf0010.1_g169690.1	Qgl_scf0020.1_g165580.1	AT1G42540.4	AT1G42540.4	IV	3.71991	3.88392	3.96286	3.93863	3.85445	3.82672	3.9385	4.19892	4.1065	3.97213	4.25901	3.60314	3.83557	4.0971	3.82661	3.75567	3.9989	3.88293	3.98019	3.77187	4.09091	4.3719	4.27689	4.41343	4.18942	3.68389	3.66846	4.47911	4.34624	4.01248	4.16503	3.73912	3.89608	3.92313	3.83756	4.15505	4.50009	5.04535	4.80707	4.56595	4.15504	4.26448	3.74003	3.96664
OG0003013	Lthed_scf0030.1_g086410.1	Qgl_scf0020.1_g167080.1	AT5G42330.1	AT5G42330.1	I	3.71758	3.45278	3.4891	3.94338	3.81915	2.84792	3.71125	2.16594	0.221306	0	0.188449	5.37683	5.56439	4.83526	4.01438	2.89927	2.15239	2.9434	4.20928	3.87025	2.28864	0.786027	0.544844	0.238969	1.12279	5.29862	4.77678	4.49491	4.96151	4.64083	3.03006	3.07916	3.37796	1.67307	0.529429	0.324074	0.0867243	0.680669	2.89112	5.66647	5.37138	3.55521	2.72436	3.51128
OG0003020	Lthed_scf0010.1_g179240.1	Qgl_scf0020.1_g173780.1	AT5G42520.1	AT5G42520.1	V	4.89237	4.85337	5.3754	5.01117	5.21776	4.91366	4.84561	4.51713	4.54701	5.34876	5.24756	4.2356	4.56809	5.26527	5.56275	5.45776	5.57098	5.33052	4.86105	4.86976	4.70498	5.15951	5.22734	4.70188	5.30192	3.92409	4.68682	4.53778	4.78691	4.74631	5.03178	5.0475	5.17478	4.91217	4.42788	4.93449	5.16713	5.01984	4.43851	4.20746	4.48722	4.99682	5.06284	5.53351
OG0003025	Lthed_scf0090.1_g029330.1	Qgl_scf0060.1_g080870.1	AT1G68810.1	AT1G68810.1	III	2.73215	3.22523	3.12552	3.86119	3.51382	3.09387	3.30805	5.01194	5.69893	5.81888	4.76678	2.73411	3.10172	2.02134	2.90862	3.47971	3.0795	3.00357	3.50921	3.79742	4.81909	5.60128	6.09584	5.5367	3.76818	1.84421	3.08886	1.67715	1.96502	2.08037	1.80058	2.0251	2.38752	3.17044	2.95794	2.86603	3.06158	2.08513	1.99547	0.690974	1.24217	2.20238	2.55438	2.0125
OG0003026	Lthed_scf0090.1_g028960.1	Qgl_scf0060.1_g081400.1	AT5G49710.3	AT5G49710.3	III	4.85555	4.42515	4.77788	4.76197	4.69068	4.36801	4.64602	4.99077	5.27171	4.95603	5.10668	5.16235	4.91786	4.50962	4.77462	4.80402	4.75272	4.6152	5.0437	5.35255	5.70851	5.48957	5.45838	5.97282	4.97015	5.21599	5.23346	5.07453	5.27908	5.07221	5.02579	4.88904	4.79065	5.01711	5.37834	5.75536	5.35478	5.52379	5.18931	5.24394	4.86805	5.35465	5.03583	5.00184
OG0003031	Lthed_scf0090.1_g049020.1	Qgl_scf0060.1_g064110.1	AT5G51100.1	AT5G51100.1	II	3.04504	2.87885	3.3802	3.17086	3.1295	3.01511	3.28938	1.97752	2.30436	3.24327	2.76376	3.4721	2.41642	2.53041	2.57319	2.84491	3.16593	2.70639	2.75633	2.81218	2.67267	3.20168	2.94594	2.18038	3.59816	3.38609	2.57689	3.28261	2.7502	3.13625	3.00652	3.24939	2.76218	3.28524	3.32879	3.10949	3.27653	3.00117	3.62172	4.0646	3.10093	2.8594	3.19322	3.12368
OG0003039	Lthed_scf0120.1_g054970.1	Qgl_scf0120.1_g049520.1	AT4G32730.5	AT4G32730.5	I	4.56011	4.23946	3.69004	4.34408	3.77085	3.73221	4.27344	3.90824	3.26339	3.05404	2.87945	4.45053	5.30046	4.80276	3.90627	4.20656	3.3409	4.00201	4.67239	4.49463	4.36599	3.7445	3.31026	3.56578	3.17006	4.7505	5.11593	4.92981	5.45379	4.93503	4.79185	4.55931	4.43012	4.27107	3.86379	3.30172	2.83838	3.306	3.99416	5.14023	5.46492	5.06976	4.52311	4.54179
OG0003040	Lthed_scf0120.1_g052350.1	Qgl_scf0120.1_g047140.1	AT5G10710.1	AT5G10710.1	IV	4.62562	4.15463	4.90126	4.62912	4.65116	4.37771	4.66384	5.17072	5.1576	5.30326	4.85264	4.49478	4.14946	4.7278	4.64694	4.71287	4.96779	4.56016	4.82037	4.63929	4.94909	5.20816	5.42352	5.42282	5.03749	4.25293	4.11155	5.08964	4.87517	4.79748	5.1726	5.16046	5.35786	5.58281	5.90648	5.89886	5.90589	5.83112	5.73038	5.02746	4.76153	5.29926	5.44473	5.4639
OG0003041	Lthed_scf0120.1_g064700.1	Qgl_scf0120.1_g057370.1	AT5G11450.2	AT5G11450.2	II	1.96693	2.07061	2.65073	2.36769	1.68903	1.89946	1.90305	2.52612	2.69603	2.5711	2.41658	2.96351	3.54183	2.30261	1.50888	1.88368	1.80567	1.57832	2.77241	2.63664	2.57167	2.93271	3.2384	2.96457	2.55434	3.83747	2.98481	3.07799	2.80326	2.84056	2.48948	2.91972	2.77848	3.60153	3.48055	3.34654	2.98103	3.11485	4.06483	3.90417	4.0164	3.28762	1.92424	2.56412
OG0003046	Lthed_scf0090.1_g001040.1	Qgl_scf0060.1_g116500.1	AT1G71270.1	AT1G71270.1	III	5.00174	4.65545	4.90361	4.88966	4.9286	5.00531	5.06193	4.67221	4.76123	5.25888	4.89675	5.10788	4.9763	5.0743	4.86527	5.01307	5.1842	5.05658	5.0668	4.94011	4.71661	4.85068	4.89569	4.70319	5.07235	5.02087	4.9482	4.71085	4.82694	4.89531	4.87552	4.92447	4.8343	4.91314	4.84774	4.82996	4.75617	4.55534	4.65349	4.97329	5.09357	4.81987	4.70172	4.82222
OG0003047	Lthed_scf0010.1_g053110.1	Qgl_scf0020.1_g052280.1	AT5G14760.1	AT5G14760.1	IV	2.20507	1.65935	1.97528	2.04139	1.80421	1.61162	1.85307	2.90194	2.97301	2.53185	3.27861	3.47582	2.17861	1.86436	2.07528	1.65254	1.63566	1.69009	2.39281	2.51605	3.27789	2.93142	2.75338	3.47313	3.65431	3.7287	2.04292	2.6879	2.08915	1.93282	2.35832	1.85589	2.0595	3.00586	3.72915	3.9846	3.63744	3.62585	3.38873	3.13669	2.05689	2.42058	1.9689	1.93324
OG0003049	Lthed_scf0010.1_g054970.1	Qgl_scf0020.1_g054460.1	AT5G14610.2	AT5G14610.6	IV	5.51116	5.8339	5.60396	6.02225	5.68025	5.88285	5.96758	6.03865	6.13777	6.5345	6.32177	5.68727	5.37358	5.4226	5.39189	5.75925	6.11663	5.51665	5.8537	5.66287	6.22849	6.23071	6.70144	6.58708	6.33046	5.56914	5.31059	5.59133	5.71805	5.77345	6.22038	5.98957	5.82523	6.03129	6.38053	6.77272	7.24817	6.65984	6.05677	5.91316	5.33886	5.53845	5.78876	6.25814
OG0003050	Lthed_scf0010.1_g056460.1	Qgl_scf0020.1_g055670.1	AT5G14520.1	AT5G14520.1	V	4.49037	4.13337	4.28529	4.74659	4.39745	4.37208	5.026	5.4238	5.77871	5.66226	5.75286	5.84262	5.01845	4.31115	4.16172	4.26756	4.31708	4.15303	5.0632	5.07734	5.87123	5.71649	5.91636	5.94922	5.43808	5.85993	4.56002	5.28905	5.0115	4.80626	5.06743	5.03442	5.00134	5.57304	5.93096	5.87486	5.56619	5.84177	6.28705	5.86272	5.12998	4.96888	4.77285	4.59915
OG0003052	Lthed_scf0010.1_g058410.1	Qgl_scf0020.1_g058350.1	AT5G14440.2	AT5G14440.1	III	3.02925	3.4633	2.67366	2.98037	3.11657	3.23822	3.40245	3.4883	3.944	3.79764	4.10042	3.50534	2.91834	2.94752	2.97196	2.78069	2.70676	2.8968	3.07708	3.37546	3.78906	3.89162	3.99715	3.98768	3.66385	3.93982	3.19036	3.44629	3.41481	3.24485	3.63844	3.49803	3.58481	3.68277	3.64448	3.95653	3.81037	3.89468	4.08202	3.32324	2.89856	3.53715	3.75593	3.45392
OG0003053	Lthed_scf0010.1_g061280.1	Qgl_scf0020.1_g060380.1	AT3G27260.4	AT3G27260.4	V	5.1955	5.42431	5.2625	5.34565	5.40308	5.53562	5.44834	5.71201	5.92438	5.90348	5.81596	5.04072	5.02888	5.21741	5.24851	5.43692	5.66808	5.53158	5.53093	5.52304	6.07348	5.87229	6.33675	6.29247	5.88447	5.23435	5.19979	5.48858	5.41807	5.35604	5.78394	5.62003	5.70005	5.95937	6.26517	6.13289	6.0883	5.90819	6.29063	5.41839	5.08919	5.66281	5.70719	5.84133
OG0003054	Lthed_scf0010.1_g061590.1	Qgl_scf0020.1_g060710.1	AT3G01780.1	AT3G01780.1	I	4.12958	4.05352	3.66677	4.23126	3.92095	3.85827	4.12583	4.04595	4.02646	3.63906	3.69905	4.38015	4.33995	4.21383	4.03766	4.10135	3.79339	3.90214	4.22954	4.14459	4.21561	3.91859	3.8641	4.15155	3.93942	4.26233	4.142	4.02776	4.32969	4.35943	4.30248	4.16495	4.04955	4.00222	3.76987	3.99476	3.79175	4.01086	3.72362	4.10185	4.09971	4.06736	4.00304	3.90465
OG0003059	Lthed_scf0120.1_g077900.1	Qgl_scf0120.1_g069490.1	AT5G51760.2	AT5G51760.2	III	3.76659	2.60101	4.70705	2.18595	4.15273	4.21476	4.82058	3.8747	4.29298	3.0513	2.19866	2.18832	4.057	3.36069	4.05853	4.65209	5.12631	4.81787	3.86114	4.71578	4.18543	4.19765	3.46495	4.13403	2.52205	1.2882	4.43143	3.32756	3.92922	3.46533	2.99708	3.53022	3.12796	3.49788	4.6814	4.43368	2.5258	4.04089	1.14713	2.42514	3.45979	3.51705	3.12262	2.3373
OG0003066	Lthed_scf0030.1_g056190.1	Qgl_scf0010.1_g133240.1	AT3G22260.1	AT3G22260.1	IV	4.68372	3.96463	4.19113	4.23589	4.12512	4.4056	4.47535	5.08325	5.39219	5.1423	4.7763	4.2686	4.29333	4.22331	4.52171	4.46914	4.07127	4.1146	4.3766	4.37056	4.86219	5.11185	5.15253	5.8257	4.50114	4.15291	4.35707	4.23555	4.1467	4.22975	4.28358	4.08828	4.06239	5.08771	5.51208	5.82437	5.47982	4.7398	4.52061	4.38223	4.24734	4.52232	4.50287	4.04237
OG0003068	Lthed_scf0100.1_g061220.1	Qgl_scf0100.1_g051630.1	AT5G64070.1	AT5G64070.1	I	3.265	2.99309	3.01763	3.1137	3.03908	2.74239	3.14698	3.22878	3.27857	3.16633	3.00068	3.23379	3.19162	3.12691	3.06577	3.13912	2.96075	3.1573	3.12814	3.0672	3.19107	3.23179	3.24057	3.20232	3.17874	3.1898	2.82084	3.30875	3.42415	3.28233	3.39171	3.24037	3.30241	3.19096	3.4351	3.52593	3.54676	3.52725	3.04264	3.25559	3.30075	3.33527	3.21454	3.08735
OG0003071	Lthed_scf0100.1_g062880.1	Qgl_scf0100.1_g050300.1	AT5G24320.1	AT5G24320.1	II	1.87372	1.92444	2.30409	2.28384	1.98025	1.75382	1.62321	2.10234	1.61725	2.24873	2.23905	1.76702	1.70197	1.75332	1.40593	1.79918	2.00801	1.91961	2.34643	1.85987	2.34181	2.36351	2.36651	2.37063	2.67369	1.99232	1.67844	2.19855	1.97058	2.09661	2.0949	2.02696	1.84509	2.24653	2.83138	2.6024	3.23963	3.36222	3.14117	2.22912	1.91101	2.24123	1.69602	1.93864
OG0003073	Lthed_scf0100.1_g070870.1	Qgl_scf0100.1_g043370.1	AT5G10050.1	AT5G10050.1	III	4.85651	4.58727	4.9383	4.84992	4.65952	5.15589	5.04661	3.70135	3.97849	4.21731	4.02167	4.01841	4.48859	4.42186	4.89756	5.06968	5.70172	5.51161	4.90074	5.00583	4.09599	4.01458	3.93195	3.32239	4.58255	3.84891	4.76343	4.28721	4.60964	4.72207	4.60151	4.88107	4.63087	4.21919	3.60733	3.69554	3.57884	3.03334	3.44143	4.26617	4.66233	4.48994	4.53833	4.83061
OG0003076	Lthed_scf0040.1_g062440.1	Qgl_scf0050.1_g072010.1	AT3G21810.1	AT3G21810.1	IV	3.53038	3.13163	3.26542	3.7956	3.59772	3.19515	3.46432	4.04399	4.38021	4.24948	4.27386	3.73098	3.40852	3.37348	3.51557	3.58369	3.49287	3.42622	3.81198	3.76	4.02919	4.25498	4.29593	4.03617	3.95579	3.84451	3.47922	3.80595	3.79039	3.61573	3.88596	3.66082	3.61077	4.07959	4.62907	4.42709	4.4275	4.25868	4.53475	3.85941	3.51545	4.10334	3.81292	3.93434
OG0003077	Lthed_scf0040.1_g054430.1	Qgl_scf0050.1_g079510.1	AT2G20740.1	AT2G20740.1	V	4.20754	4.36682	4.98939	4.58053	5.01874	4.67959	4.84663	4.60307	4.57854	5.10866	4.64067	4.36458	3.2718	4.22589	4.13098	4.24164	4.98286	4.89988	4.27563	4.17445	3.87745	4.29974	4.04602	4.36047	4.33814	4.02224	3.42712	3.24387	3.39077	3.91772	3.91362	4.37928	4.23206	4.09666	3.55288	4.00675	4.40173	4.33389	3.50452	3.29561	3.0792	3.03516	3.70333	4.16588
OG0003079	Lthed_scf0080.1_g105850.1	Qgl_scf0070.1_g005760.1	AT1G74960.3	AT1G74960.3	II	4.93754	5.01988	4.35018	5.38528	4.85999	4.8174	5.22325	6.13107	6.20594	6.04739	5.87439	4.98134	5.4039	4.8369	4.93037	5.06092	4.7179	4.6433	5.63255	5.54539	6.16369	6.20165	6.01416	6.2311	5.73124	5.52504	5.69113	5.2645	5.52223	5.25729	5.60614	5.53164	5.40123	5.92018	6.17724	6.27744	6.15668	5.78736	5.2684	5.2224	5.86826	5.86053	5.55119	5.63416
OG0003080	Lthed_scf0080.1_g107110.1	Qgl_scf0070.1_g003620.1	AT5G20635.1	AT5G20635.1	I	2.20623	2.44139	2.72102	3.88171	3.33976	3.93483	4.21766	3.64121	3.25015	2.95812	4.29098	4.45882	1.89849	1.99657	1.41381	3.23823	3.07101	3.06392	4.2658	3.73887	4.30857	2.92098	2.2209	1.83479	4.46879	4.4693	1.91376	2.17402	2.83525	2.977	2.99622	2.49113	2.90675	2.11771	0.67759	0.315289	0.526209	2.48202	3.19827	3.97296	1.97136	1.31777	1.077	2.02966
OG0003085	Lthed_scf0010.1_g029270.1	Qgl_scf0020.1_g028790.1	AT5G35430.1	AT5G35430.1	III	4.59399	4.66573	4.57964	4.60765	4.68231	4.31831	4.45952	4.39206	4.37679	4.24942	4.42545	4.68842	4.58358	4.44415	4.59591	4.57075	4.63601	4.50299	4.47348	4.47168	4.44081	4.35279	4.36484	4.62567	4.22789	4.58612	4.38523	4.56703	4.68766	4.64884	4.84412	4.60525	4.64181	4.52724	4.41342	4.63815	4.65152	4.64643	4.2325	4.5799	4.59214	4.55799	4.47179	4.49179
OG0003086	Lthed_scf0080.1_g077410.1	Qgl_scf0070.1_g035470.1	AT1G65650.1	AT1G65650.1	III	5.94724	5.62342	5.71861	5.73409	5.64279	5.6516	5.73428	5.54078	5.83697	5.72535	5.77638	5.77464	5.78446	5.97863	5.80017	5.48324	5.56452	5.75029	5.72741	5.85746	5.8874	5.99206	5.87518	6.11432	5.74159	5.94288	5.91437	5.99423	5.85533	5.79252	5.88823	5.86428	5.75719	5.82619	6.2369	5.98429	6.09293	6.10833	5.89563	5.90915	5.93277	5.83526	5.79092	5.86243
OG0003087	Lthed_scf0120.1_g086590.1	Qgl_scf0120.1_g075800.1	AT1G06780.1	AT1G06780.1	IV	2.83982	2.91489	1.72583	3.06724	2.45966	2.90026	2.78517	3.76487	4.32715	4.00056	3.99819	3.76173	2.70952	2.97451	2.92469	2.21042	2.72054	2.64949	2.85486	3.36348	3.8466	4.23452	4.55753	4.52466	3.58378	4.04412	2.94031	2.99255	3.05959	2.83579	3.19988	2.88844	2.99504	3.6641	4.53554	5.12464	5.7165	5.37584	4.64404	3.56288	2.76965	2.97319	3.08949	2.92737
OG0003089	Lthed_scf0090.1_g076440.1	Qgl_scf0060.1_g036580.1	AT1G08620.4	AT1G08620.3	V	3.99959	3.92647	4.18902	3.94224	3.96921	4.0842	4.09421	4.13518	4.39907	4.58476	4.36655	3.72917	3.71078	3.82649	3.78027	3.96895	4.27724	4.07838	3.95291	3.83677	3.97915	4.23186	4.25615	4.15807	4.44953	3.8233	3.67216	4.14548	4.11802	4.13121	4.24038	4.3771	4.19592	4.4643	4.44512	4.6948	4.89415	4.86914	4.39959	4.11162	4.05073	4.11626	4.15467	4.44941
OG0003090	Lthed_scf0040.1_g071570.1	Qgl_scf0050.1_g064170.1	AT2G04780.2	AT2G04780.2	I	7.78315	7.90685	7.61243	7.81211	7.73747	7.65027	7.76275	7.62097	6.79135	5.59863	5.77159	7.42567	8.07728	7.4902	7.30165	7.36412	6.48496	7.49464	7.82833	7.63406	6.64888	6.22665	5.10805	5.52296	6.37412	7.18155	7.83157	7.53613	8.12814	8.3607	7.35364	7.6291	7.97841	6.43594	7.01566	5.65892	3.64906	5.87349	5.41928	7.79093	7.98977	7.5126	6.82831	7.08289
OG0003091	Lthed_scf0030.1_g044140.1	Qgl_scf0010.1_g146570.1	AT4G14540.1	AT4G14540.1	III	4.59789	3.20695	3.44882	3.53646	2.80783	3.91479	2.87674	3.10324	4.12749	3.61929	3.98492	3.17343	3.72287	4.11712	3.58072	3.74101	3.018	3.06482	3.50816	3.58841	4.15444	4.50831	4.44175	4.52932	3.75982	3.04083	4.47339	4.61455	4.56767	4.10419	4.51579	4.55325	4.70198	4.61415	4.53976	4.52605	4.8387	4.66353	4.57781	3.71331	4.30159	4.88713	5.09116	4.60788
OG0003092	Lthed_scf0030.1_g048340.1	Qgl_scf0010.1_g143290.1	AT3G07650.4	AT3G07650.4	IV	5.7327	5.82413	5.55403	5.67887	5.3007	5.12106	5.3172	5.90367	6.14546	7.32149	6.92894	5.21361	5.32502	5.40726	5.43233	5.44666	5.47316	4.98801	5.40968	5.6974	5.84663	6.69219	6.65198	7.06642	5.98803	4.99332	5.33228	4.88468	5.12955	4.94054	5.00601	5.50613	5.15468	5.79719	6.12429	6.61414	7.14047	6.45064	5.92001	5.05595	5.48569	5.19737	5.57207	5.40911
OG0003100	Lthed_scf0120.1_g017190.1	Qgl_scf0120.1_g013100.1	AT5G47080.1	AT5G47080.1	IV	6.58058	6.607	6.70787	6.47174	6.51853	6.79824	6.52314	6.87257	7.0265	7.20766	7.11345	6.87305	6.39839	6.49774	6.66946	6.66299	7.01832	6.64682	6.49601	6.63747	7.03378	7.21106	7.34603	7.56003	7.09292	6.60905	6.44438	6.76153	6.86999	6.75208	6.92641	6.8433	6.87339	6.91115	7.55273	7.78333	7.7899	7.73288	7.25074	6.99316	6.60347	6.67273	6.9029	6.94247
OG0003105	Lthed_scf0120.1_g003530.1	Qgl_scf0120.1_g003190.1	AT1G32230.6	AT1G32230.3	IV	5.22741	5.24898	5.30453	5.09615	5.15457	5.0723	5.43023	6.02795	6.58443	6.96819	6.56254	5.29923	5.3447	5.29047	5.31789	5.20991	5.50519	5.3827	5.29721	5.44955	5.98121	6.74105	6.90491	7.54888	6.386	5.49177	5.38372	4.80318	4.68494	4.96269	4.80621	4.82665	5.00208	5.47732	6.99873	7.42348	7.36293	6.85563	5.88904	4.91927	4.83339	4.85527	5.12815	4.86848
OG0003108	Lthed_scf0010.1_g144810.1	Qgl_scf0020.1_g135200.1	AT4G10970.7	AT4G10970.7	III	5.98987	5.38824	5.22455	5.25953	5.16917	5.48619	5.51597	5.82945	6.15941	5.90547	5.9344	6.31887	5.73776	5.74684	5.76882	5.20882	4.94801	5.12476	5.22731	5.52734	6.12233	6.46866	6.33621	6.59377	6.20535	6.08577	5.58936	5.93166	5.88131	5.45345	5.49604	5.75759	4.94176	5.85858	6.05843	6.77611	7.16312	6.64105	5.15633	5.94152	5.78883	5.64625	5.22373	5.52489
OG0003116	Lthed_scf0040.1_g101180.1	Qgl_scf0050.1_g040140.1	AT4G27450.1	AT4G27450.1	III	3.51576	4.66075	6.26319	7.13652	6.45975	5.0216	4.06143	5.66282	6.5559	7.36526	6.93258	5.24122	3.6194	4.45936	6.26283	5.60782	5.32367	5.45484	4.90264	4.85615	4.86668	6.49661	8.59782	8.37763	6.3173	6.25804	3.8101	6.27285	5.28963	6.61023	6.05981	6.30269	6.34524	6.60436	7.44335	7.28585	8.73689	6.84955	7.32764	6.11282	5.33475	4.92102	6.2073	7.49216
OG0003120	Lthed_scf0040.1_g119400.1	Qgl_scf0050.1_g021800.1	AT4G22030.1	AT4G22030.1	II	1.13135	1.15479	0.390961	1.04179	0.627645	0.537939	0	0.0761526	0.0940094	0.0919951	0.421261	1.59968	0.691772	2.27844	1.21632	1.67473	0.306124	1.2261	0.447718	0.609059	0.338871	0.142631	0.110332	0	0.147601	2.21218	0.414583	2.87829	2.47149	2.20024	2.10759	1.57208	1.78318	1.9269	1.99291	2.283	3.62268	4.3943	4.28267	3.28803	3.0461	3.33173	2.45196	1.67897
OG0003121	Lthed_scf0040.1_g121080.1	Qgl_scf0050.1_g020500.1	AT3G20800.1	AT3G20800.1	I	5.24083	5.01862	5.37789	5.24459	4.91404	4.95341	5.17502	5.22063	5.23641	5.31998	5.04223	5.29861	5.26701	5.17834	5.18254	5.10611	5.324	5.2307	5.27504	5.06983	4.89244	5.13002	5.27923	5.06115	5.16276	5.4034	5.08372	5.07478	5.33449	5.32454	4.97319	5.24958	5.22875	5.23757	5.56757	5.59697	5.75079	5.66408	5.25865	5.5703	5.30994	5.22189	5.13854	5.15136
OG0003122	Lthed_scf0040.1_g128420.1	Qgl_scf0050.1_g012010.1	AT1G55900.1	AT1G55900.1	III	3.49405	3.58069	3.26761	3.61951	3.72269	3.43837	4.09647	4.41576	3.85975	3.75069	4.17963	4.8901	4.08477	3.6578	3.46558	3.78898	3.66785	3.78415	3.97773	3.80685	4.11342	3.93129	4.08838	4.01019	3.95605	4.82792	3.93707	3.70065	3.25517	3.76134	3.3301	3.27108	3.37124	3.4829	3.50628	3.97806	3.74054	4.10766	3.89603	4.0072	3.3386	3.26061	2.88095	2.83474
OG0003125	Lthed_scf0120.1_g082080.1	Qgl_scf0120.1_g072770.1	AT2G25840.2	AT2G25840.2	II	1.69025	1.33246	1.82826	2.18069	2.02553	1.82612	1.9696	2.11503	2.45513	2.21486	1.67818	2.82429	1.94837	1.75872	2.01363	1.91159	1.62385	1.61682	1.85868	1.85273	1.59652	2.03651	2.33035	1.68675	2.46077	2.23571	1.97208	2.21258	1.96021	2.12705	2.36342	2.54023	2.47662	2.89175	2.59669	2.54619	2.34666	2.09988	2.78362	2.58064	2.7397	2.69891	2.55459	2.58857
OG0003149	Lthed_scf0100.1_g051310.1	Qgl_scf0100.1_g057460.1	AT2G31970.1	AT2G31970.1	V	2.70982	2.34212	2.57982	2.62866	2.74491	2.66749	2.47189	2.60881	2.37568	2.60529	2.39042	2.67226	2.65215	2.77372	2.72535	2.87922	2.87131	2.65571	2.81835	2.7672	2.60221	2.88465	2.82488	2.4564	2.92627	2.72648	2.41292	2.83131	2.86324	2.90453	3.05863	3.04226	3.10373	2.99663	3.41485	3.06857	2.97323	3.28094	3.22206	2.93597	3.08021	3.04037	3.03784	2.74517
OG0003150	Lthed_scf0100.1_g054360.1	Qgl_scf0100.1_g055480.1	AT3G23790.1	AT4G14070.1	II	3.0701	3.22853	2.64398	2.99867	2.71512	2.81154	2.45743	2.48574	2.36253	2.552	2.48023	2.67043	3.05721	3.36204	3.14065	3.28972	3.28006	3.25814	3.25622	2.97301	2.71335	2.68538	2.5428	2.34668	3.08904	3.17087	3.15006	2.46919	2.57024	2.8016	2.50817	2.73211	2.48833	2.55753	2.17297	2.18241	1.87925	2.13639	2.00345	2.70685	2.73465	2.61376	2.82644	2.78145
OG0003156	Lthed_scf0100.1_g012860.1	Qgl_scf0100.1_g092080.1	AT2G47900.3	AT2G47900.3	V	5.14588	5.13039	5.75652	5.88887	5.65114	5.50638	5.34655	5.77763	5.70526	6.13622	6.05402	5.28378	5.09546	5.20413	5.7345	5.50698	5.72285	5.4333	5.62492	5.44217	5.35114	5.78947	6.55819	6.2939	5.23227	5.07738	5.1382	6.00368	6.05789	5.88949	6.08377	5.98814	5.86246	5.75566	5.50591	5.76617	6.68982	6.13446	6.52905	5.52792	5.57689	5.90525	6.03486	6.45489
OG0003179	Lthed_scf0010.1_g197390.1	Qgl_scf0020.1_g191300.1	AT1G10070.2	AT1G10070.2	V	3.22983	3.84272	3.95085	3.41978	3.25293	3.58618	4.3528	4.17699	4.19281	4.33802	4.73341	4.90708	2.93564	4.21467	5.24642	3.53072	2.71441	3.06405	3.58001	4.19389	3.4655	3.38823	4.7466	4.12136	4.42813	5.98747	3.99812	4.59111	3.77004	3.78778	3.83737	4.36304	3.96841	1.77633	1.08783	1.0523	1.544	1.55718	5.99165	6.15336	4.25814	4.3495	4.54772	4.71778
OG0003184	Lthed_scf0070.1_g068350.1	Qgl_scf0080.1_g059110.1	AT1G34130.1	AT1G34130.1	V	5.85397	5.66638	5.39149	5.74328	5.68447	5.58938	5.76139	5.8727	6.20221	5.90024	5.91528	5.91732	6.07159	5.79312	5.52119	5.61207	5.61628	5.66593	5.89087	5.8514	5.93609	6.09682	6.08096	6.01883	5.76325	6.14361	5.73359	5.84322	5.82583	5.88278	6.13126	6.00823	6.04606	6.22651	6.42868	6.62573	6.82703	6.59529	5.97232	6.08153	6.06906	5.81338	5.91322	5.70118
OG0003189	Lthed_scf0070.1_g048890.1	Qgl_scf0080.1_g040910.1	AT1G68550.2	NA	I	1.32602	1.03695	2.07167	1.17553	1.19746	1.85648	2.62294	2.01617	2.25017	2.72074	2.16943	2.7903	1.9975	1.59307	1.86683	2.29733	1.81297	2.35452	2.21252	2.44327	2.53342	2.71617	2.63476	2.3458	2.99187	2.00264	2.02866	1.20793	0.920399	1.28726	1.09214	1.07989	1.57508	1.37509	0.655075	0.106325	0.396485	1.53656	1.97856	1.27993	0.761053	0.873969	1.4054	0.971793
OG0003195	Lthed_scf0030.1_g146620.1	Qgl_scf0010.1_g016270.1	AT5G13700.1	AT5G13700.1	II	2.00306	2.11356	2.06155	2.95183	1.91708	2.14319	1.69256	1.60396	1.73311	1.90259	2.30593	3.51059	3.24161	1.97262	2.30922	2.20674	2.08017	2.11116	2.18246	1.92769	1.87781	2.13764	2.39446	2.64545	1.98506	3.5501	2.6639	2.32416	2.57864	2.52992	2.61988	2.47258	2.16257	2.23949	2.70067	3.10199	2.66857	2.53312	2.66746	2.47497	3.02152	2.0993	2.205	2.38623
OG0003196	Lthed_scf0030.1_g145910.1	Qgl_scf0010.1_g017030.1	AT5G13730.1	AT5G13730.1	II	0.719048	1.92452	0.630177	1.27273	0.0735565	0.406445	0.417435	0.99162	0.879875	2.01217	1.6395	0.962969	0.377339	0.404028	0.426413	0.602906	0.343501	0.221478	0.569878	0.756651	0.741343	1.40957	1.16244	0.24181	1.72615	0.460824	0.665276	1.15715	1.22508	1.03634	1.02378	1.9132	1.28026	2.20373	1.4218	0.779889	1.15916	1.48144	2.70979	1.06684	1.58471	1.39423	1.09429	1.37659
OG0003200	Lthed_scf0020.1_g183550.1	Qgl_scf0030.1_g000270.1	AT3G07525.2	AT3G07525.2	III	3.7624	4.11917	3.96314	4.38819	3.73845	3.94128	4.18235	3.81238	3.79048	4.20987	4.18396	3.96137	3.81255	4.02765	3.86362	3.77266	4.18602	3.8149	4.09136	4.02362	3.42224	3.89531	3.99187	3.86323	4.05468	4.0939	3.79134	1.23235	2.10464	2.32641	2.0351	2.14513	2.04086	1.88942	1.26639	1.00165	0.923473	0.416851	1.1999	1.87815	2.11735	1.92114	2.63275	2.67737
OG0003201	Lthed_scf0110.1_g066110.1	Qgl_scf0110.1_g027760.1	AT5G01320.1	AT5G01320.1	V	5.47831	5.29146	6.34585	7.00052	7.09537	6.67773	6.20456	6.34917	6.39654	6.04417	6.03521	5.86827	5.66732	6.69821	7.55804	6.84953	6.96828	6.73357	6.64242	6.48668	6.59833	6.94106	6.40308	6.15365	6.35901	5.6834	5.91882	6.31445	6.69639	7.33041	6.89813	7.29954	7.23353	6.97738	7.30893	7.40641	7.6958	7.79034	6.50059	6.34336	6.51713	6.67687	7.24331	7.34463
OG0003203	Lthed_scf0030.1_g159330.1	Qgl_scf0010.1_g001980.1	AT1G05577.1	AT1G05577.1	I	0.0678973	0.251229	0	0.790927	0.5917	0.506615	0.245948	0.265089	0	0.316276	0.14427	0.312808	0.081959	0.341977	0.0674258	0.65115	0.320744	0.680847	1.06257	0.817087	0.510179	0.323409	0.142819	0.0914099	0.495835	0.349749	0.115815	0.139118	0.336148	0.502582	0.265976	0.316209	0.445658	0.330569	0.0339161	0	0	0.150319	0.137833	0.441107	0.0800475	0.469901	0.331896	0.455776
OG0003211	Lthed_scf0110.1_g098000.1	Qgl_scf0110.1_g001160.1	AT2G37570.1	AT2G37570.1	IV	5.421	6.08105	5.94121	5.74748	5.61036	5.81825	5.30808	5.6541	5.88466	5.86131	5.80967	5.2113	5.78008	5.54014	5.79516	5.82188	5.90211	5.74897	5.55554	5.46899	5.86954	5.67697	5.97867	6.57099	5.84936	5.68938	5.90278	6.17174	5.95413	5.7647	5.75345	5.63541	5.38059	5.50966	6.22543	6.41323	6.54627	6.76643	6.37504	6.27847	5.80597	6.02638	6.00667	5.91553
OG0003214	Lthed_scf0110.1_g089680.1	Qgl_scf0110.1_g009510.1	AT5G03370.1	AT5G03370.1	III	5.75488	5.7342	6.16394	5.02263	5.64534	5.79225	5.41695	4.89414	4.99374	5.00821	4.70349	4.68339	5.4001	5.44405	5.99313	5.57354	6.15083	6.0719	5.11239	4.92759	4.91251	4.85982	5.74241	5.22053	4.98154	4.76941	5.38104	4.85897	5.13012	5.47944	5.10977	5.35787	5.38578	5.08241	4.87455	5.05128	5.32271	5.37762	5.26778	4.56058	5.24988	4.7721	5.71571	5.25993
OG0003220	Lthed_scf0030.1_g050020.1	Qgl_scf0010.1_g141380.1	AT1G50500.4	AT1G50500.4	V	4.15567	3.96919	4.1528	4.20118	4.05943	4.1711	4.3067	4.53287	4.40036	4.58164	4.35431	4.12645	4.4407	4.1571	4.19287	4.32104	4.29793	4.37544	4.57135	4.54262	4.50962	4.87405	4.90252	4.61614	4.77473	4.37705	4.41261	4.72785	4.70708	4.7916	4.9275	5.00018	5.19229	5.11415	5.20549	5.09127	4.89117	4.81751	4.95923	4.87678	4.74272	4.86094	4.81956	4.83864
OG0003230	Lthed_scf0020.1_g156810.1	Qgl_scf0030.1_g025030.1	AT4G21215.2	AT4G21215.2	II	1.06541	1.35467	0.211775	1.73951	1.32692	1.01291	0.384778	1.58197	1.60851	2.32081	2.15494	1.19686	0.523698	1.15386	0.737395	0.455301	1.26058	1.56408	0.797084	1.006	1.63231	2.08046	2.46467	2.84855	2.22041	2.43226	0.905874	1.91339	1.85411	1.49472	2.21094	2.03233	1.67795	2.46126	2.85301	2.93058	2.80137	2.12551	2.50398	1.42926	0.928183	2.38875	2.4263	2.18621
OG0003233	Lthed_scf0020.1_g097040.1	Qgl_scf0030.1_g084000.1	AT4G18480.1	AT4G18480.1	II	5.18385	4.90948	4.56339	4.89372	4.75436	4.96203	5.04589	4.98186	4.80057	4.73829	4.54062	5.49395	5.78269	4.83643	4.40383	4.59678	4.93787	4.75919	5.06406	5.07057	4.7139	4.97383	5.31905	5.07132	4.61003	5.79362	5.38997	4.69841	4.67789	4.78998	4.71229	5.03174	5.02955	4.6576	4.00116	3.33235	3.72825	2.93419	4.99584	5.20523	5.7153	4.77569	4.39426	4.72075
OG0003235	Lthed_scf0020.1_g094500.1	Qgl_scf0030.1_g088300.1	AT1G28520.5	AT1G28520.5	IV	5.19627	4.97449	4.94152	5.07484	4.818	4.83265	5.01632	5.45034	5.62577	5.79368	5.78381	5.14042	5.43235	4.99692	5.09097	4.89693	4.5546	4.74473	4.8864	5.08347	5.72498	5.84958	5.90608	5.94174	5.65291	5.37884	5.48185	5.80721	5.57885	5.15471	5.28788	5.09808	5.21788	5.87364	6.28189	6.53217	6.95565	6.75121	6.40065	6.00148	5.45367	5.69551	4.97194	5.14189
OG0003236	Lthed_scf0020.1_g090950.1	Qgl_scf0030.1_g091330.1	AT1G28340.1	AT1G28340.1	III	3.91774	4.04268	4.26242	3.99064	4.06953	4.00934	4.08674	3.49134	3.98013	3.47508	3.73284	4.05527	4.43298	4.02945	4.13703	4.04108	4.05783	4.07163	4.14708	4.06172	3.95476	3.83041	3.6905	3.85914	3.5174	4.63953	4.04329	3.77058	3.90082	3.72377	3.93185	3.91714	3.48376	3.3582	3.64369	4.07938	3.90994	4.26788	3.67257	3.41112	4.00435	3.80891	3.77113	3.61657
OG0003237	Lthed_scf0110.1_g024030.1	Qgl_scf0110.1_g061730.1	AT2G40890.1	AT2G40890.1	I	7.51558	6.96361	6.97103	7.01211	6.61254	6.80205	6.49169	7.22593	6.59044	6.34396	5.59444	5.17256	6.1929	6.61683	6.66662	6.57322	6.38406	7.04423	6.85412	7.07055	6.32143	6.49674	6.06492	6.24485	5.53062	6.35724	7.14764	6.01946	6.72943	7.03146	6.71282	6.26688	6.90021	6.51402	6.35668	6.22714	6.61282	5.62887	4.42094	5.26709	6.549	7.22576	6.35399	6.54165
OG0003241	Lthed_scf0110.1_g048390.1	Qgl_scf0110.1_g044120.1	AT3G58030.4	AT3G58030.4	III	4.86028	5.23763	5.15394	5.28504	5.18073	5.1805	5.33698	5.76969	5.45408	5.75709	5.58902	4.99081	5.16322	5.18307	5.0515	5.22648	5.47312	5.26249	5.54243	5.37467	5.91945	5.99364	5.94561	6.25128	5.77049	5.36272	5.18185	5.65203	5.43899	5.26312	5.50299	5.41624	5.394	5.73736	6.03191	6.36423	6.18227	5.94049	5.5774	5.57387	5.19258	5.45805	5.11362	5.63922
OG0003245	Lthed_scf0110.1_g073700.1	Qgl_scf0110.1_g021480.1	AT2G35980.1	AT2G35980.1	I	4.53488	5.08845	5.34095	6.26439	6.70629	5.89862	4.37892	3.66433	6.28334	4.32163	4.62957	5.30426	4.61728	5.73169	6.59374	5.63774	5.47897	3.66026	2.8929	4.89819	3.29252	3.25897	4.16136	5.3347	5.31517	3.8456	3.75779	4.45564	4.74416	5.2619	3.82756	4.14834	3.20357	3.87521	7.16121	8.43194	4.49048	8.56022	5.4544	4.24695	4.55808	3.65867	5.39621	3.73399
OG0003246	Lthed_scf0110.1_g080000.1	Qgl_scf0110.1_g016700.1	AT5G03650.1	AT5G03650.1	IV	4.40749	4.2602	3.81852	3.98063	4.11731	3.96555	4.65851	4.6692	4.69881	4.86528	5.06974	4.44176	4.39243	4.8151	4.93107	4.50072	4.49157	3.96487	4.21928	4.67715	4.72428	5.29592	4.92055	4.78493	4.75457	4.72256	4.55096	4.68612	4.40373	4.19711	4.45617	5.07511	5.08547	5.8545	6.19067	6.03327	5.81452	5.95695	5.88036	4.80596	4.36153	4.27954	4.90112	4.50159
OG0003247	Lthed_scf0110.1_g082190.1	Qgl_scf0110.1_g014860.1	AT2G36630.1	AT2G36630.1	III	3.24742	3.34146	2.17365	2.86083	2.91143	3.12973	3.29224	4.42003	4.76449	4.5558	4.24772	3.03949	5.17384	3.76944	3.40712	3.06897	2.73589	2.52589	3.58626	3.80267	3.89831	4.71719	4.96989	4.7282	3.77755	4.48828	4.35813	3.95169	4.00715	3.61981	3.3014	2.83335	3.13363	2.82705	4.20344	4.65798	5.2748	4.49634	3.36695	3.35063	4.35536	4.202	3.75598	3.23872
OG0003249	Lthed_scf0110.1_g084260.1	Qgl_scf0110.1_g013970.1	AT2G36720.2	AT2G36720.2	III	4.37494	4.30254	4.51612	4.15706	4.53231	4.43026	4.56645	4.50129	4.60618	4.80502	4.7717	4.3602	4.26785	4.32558	4.20998	4.51162	4.6552	4.4761	4.564	4.57287	4.73809	4.86775	5.05623	4.961	4.7357	4.56013	4.22768	4.40655	4.56373	4.54991	4.61051	4.65285	4.50173	4.8671	4.97397	4.98191	5.17749	4.74924	4.65696	4.52761	4.44132	4.54101	4.66952	4.66951
OG0003252	Lthed_scf0110.1_g085160.1	Qgl_scf0110.1_g013310.1	AT3G53150.1	AT3G53150.1	II	1.3705	0.729817	1.00185	0.60683	0.650817	1.00149	0.487494	0.284644	0.217447	0.0745611	0.540997	0.739623	1.05955	1.12046	1.02239	1.13849	0.56368	0.997284	0.574091	0.398167	0.336941	0.250372	0.388765	0.113781	0.671415	0.625845	1.17865	1.02944	1.40273	1.27722	1.01863	1.09514	0.519224	0.63138	0.112953	0.609099	0.0591773	0.052545	0.557901	0.422169	1.69714	1.4652	1.70113	1.68526
OG0003259	Lthed_scf0110.1_g001670.1	Qgl_scf0110.1_g082640.1	AT2G41760.1	AT2G41760.1	I	4.38036	4.16038	4.26785	4.11361	4.42622	4.16915	4.29265	3.12797	3.62701	3.39203	3.50781	4.0995	3.97741	4.96104	4.50048	4.19611	4.25727	4.30625	4.03489	3.87109	3.3498	3.51799	3.29283	2.91327	3.95309	3.99776	3.94739	3.84057	4.18653	4.47466	3.75595	3.9263	4.00822	3.66365	3.35821	3.29363	2.44403	2.83732	3.2744	4.025	4.15882	3.62241	3.70443	3.63277
OG0003260	Lthed_scf0020.1_g160300.1	Qgl_scf0030.1_g021200.1	AT4G05180.2	AT4G05180.2	II	8.00007	7.4227	8.55034	7.75064	7.95029	8.26223	7.1874	6.82172	6.55624	6.16624	5.41569	7.64497	8.63578	7.8	7.86725	7.3412	8.23254	8.01118	6.96033	7.64441	7.29038	6.8115	7.76038	7.10506	7.22217	8.14454	8.51025	7.67772	7.80412	8.46259	7.61424	8.00277	7.95605	7.07048	6.49832	4.95002	3.97672	3.32552	7.05461	8.05301	9.22708	8.13821	8.04148	8.17956
OG0003265	Lthed_scf0020.1_g105290.1	Qgl_scf0030.1_g077980.1	AT4G18740.4	AT4G18740.4	II	2.84011	2.52844	2.11558	2.68971	1.62745	2.06544	2.93638	2.69634	1.99512	1.85451	2.0102	1.92645	2.17317	2.23721	2.12502	2.3446	2.63617	2.24027	2.52027	2.36759	2.21094	1.98604	1.94179	1.59532	2.55476	2.23268	2.42961	2.80547	2.32093	2.72203	2.33576	3.1401	2.5807	3.08444	0.916841	0.875743	1.94442	1.4241	3.04694	2.50195	2.93578	3.50726	3.7229	3.03033
OG0003267	Lthed_scf0020.1_g160400.1	Qgl_scf0030.1_g021020.1	AT4G00390.1	AT1G61730.1	III	6.87382	6.92574	6.66003	7.00959	6.71675	6.76123	6.937	6.95748	6.94388	7.0356	7.13875	6.96659	6.61815	6.46686	6.61757	6.79162	6.9356	6.86056	6.8372	6.63319	6.91107	6.80608	6.90496	7.15897	6.66354	6.7375	6.49211	7.0478	6.98889	6.92305	7.07483	6.8794	6.92569	6.72912	6.95731	7.28756	7.33756	7.14922	6.90057	7.17464	6.77313	6.7187	6.74615	6.91561
OG0003269	Lthed_scf0020.1_g155570.1	Qgl_scf0030.1_g026280.1	AT1G11580.2	AT1G11580.1	I	0.0615768	0.472093	0	0.0551746	0	0	0.0593864	0.44869	0.0795338	0.352962	0.307768	0	0.225839	0.966487	1.21248	0.085328	0.243486	0	0.0386134	0	0.287043	0.28644	0.990457	0.165265	0.08574	0.326309	1.22079	2.05403	2.07725	0.602723	1.60318	0.95136	2.0057	2.31107	2.31466	1.54874	1.7859	2.29734	1.9024	2.04602	1.74064	0.916331	1.1385	1.07129
OG0003271	Lthed_scf0020.1_g146510.1	Qgl_scf0030.1_g032900.1	AT4G22260.1	AT4G22260.1	IV	4.69146	4.11977	4.08301	4.10273	4.23905	4.14812	4.45541	4.63054	5.60097	5.84568	5.21386	4.18783	3.82884	3.93323	4.27643	4.56943	4.86093	4.38679	4.15353	4.53858	5.03824	5.58784	5.49263	6.03982	5.51993	4.08545	4.3003	4.57139	4.73635	5.1052	5.27461	5.62223	5.81561	6.28356	6.52036	6.85994	6.81319	6.27272	5.87661	5.21267	4.938	5.37065	5.68918	5.26201
OG0003287	Lthed_scf0070.1_g070450.1	Qgl_scf0080.1_g060480.1	AT2G26560.1	AT2G26560.1	I	0	0	0	0.0679827	0	0	0.0737585	0	0	0	0.161838	0.0768428	0.18542	0.0701021	0.27478	0.433355	0	0	0.0261494	0.108877	0	0.030646	0.116701	0.14546	0.183409	0.104161	0.0539372	0.494839	0.3741	0.460697	0.394478	0.185484	0.249595	0.221773	0.266092	0.445596	0.307093	0.0694125	0.464975	0	0	0.267199	0.907432	0.408051
OG0003289	Lthed_scf0070.1_g002400.1	Qgl_scf0080.1_g001050.1	AT5G50930.1	AT5G50930.1	III	3.08207	2.49729	2.27305	3.76762	2.52226	2.24094	3.02898	3.96992	3.44871	4.34117	4.45909	4.92017	2.74533	3.08044	2.65954	2.61723	2.28454	2.24362	3.55784	3.45243	3.95424	4.21033	3.78473	3.83544	4.12484	4.75771	2.6931	3.51761	3.94954	3.314	3.2778	3.16593	3.26382	4.05128	4.23394	4.39578	4.48651	4.42266	5.13856	4.36656	3.22098	3.56934	2.933	3.34423
OG0003290	Lthed_scf0070.1_g003080.1	Qgl_scf0080.1_g002590.1	AT3G48820.1	AT3G48820.1	III	2.80537	3.09076	3.38645	3.34238	3.04625	2.81035	3.06931	3.92999	3.90882	4.08977	3.92333	3.42321	3.01956	2.81922	2.73605	2.99839	2.92853	2.80293	3.27337	3.23225	3.40901	3.46909	3.94264	3.2718	3.71963	3.42369	2.92537	2.62004	2.54105	2.54072	3.00153	2.71474	2.34681	2.78999	2.75222	2.65151	3.09983	2.91602	2.92691	2.5318	2.69297	2.84488	2.92173	2.74533
OG0003297	Lthed_scf0070.1_g029140.1	Qgl_scf0080.1_g023670.1	AT5G62680.1	AT5G62680.1	III	0.693773	1.17549	0.460643	2.20142	1.4432	1.79302	1.19135	1.77528	2.56429	1.93662	2.14337	1.24824	0.76512	1.74362	1.21529	1.79632	1.48641	1.60016	1.37765	1.54509	1.66917	1.79307	1.67395	2.28551	1.60896	0.885439	1.33001	1.83192	1.31959	1.93034	1.38558	1.50684	1.35083	1.68738	2.09351	2.47917	2.90032	2.86829	1.35405	1.53941	1.10721	1.4981	1.88646	1.44095
OG0003299	Lthed_scf0070.1_g031060.1	Qgl_scf0080.1_g025620.1	AT5G20970.1	AT2G27140.1	I	1.55029	1.78518	2.32066	1.63925	1.49774	2.13212	2.53418	2.37499	1.42262	0.968806	0.436585	2.06104	2.2769	1.17824	1.23104	1.11518	1.25338	1.66024	1.40164	2.00652	1.3377	1.4825	0.953742	1.20333	0.417345	2.80094	2.29052	1.72188	1.31689	1.6579	1.5881	1.18015	1.07246	1.33002	1.87159	1.01252	0.648173	1.14237	0.78811	1.91058	2.02309	1.34558	0.805162	1.4811
OG0003311	Lthed_scf0120.1_g017670.1	Qgl_scf0120.1_g013660.1	AT4G17610.2	AT4G17610.2	III	1.86189	1.99678	1.64766	1.77698	1.61687	2.15563	1.81858	2.02939	2.10814	2.2237	2.27951	2.35732	2.01258	1.65253	1.77999	1.88169	2.15229	2.01176	2.03215	1.79425	2.05177	2.05582	2.34659	2.15485	2.47602	2.13929	1.46952	1.99527	1.78286	1.79549	2.00306	1.87593	1.73826	2.18989	2.39662	2.04587	1.78821	1.90214	2.55494	2.28439	1.79986	2.04686	1.67276	1.59913
OG0003314	Lthed_scf0120.1_g004460.1	Qgl_scf0120.1_g003740.1	AT1G31360.1	AT1G31360.1	III	2.68413	2.87247	2.72528	2.80206	2.58777	2.42551	2.92348	2.86332	2.93728	3.1619	2.87679	3.35158	2.78153	2.74023	2.67762	2.93192	2.99708	2.86298	3.1373	3.09136	3.1136	3.17988	3.09998	2.91165	3.16195	3.17061	2.87609	2.83828	3.19188	3.13271	3.30143	3.38334	3.3267	3.20484	3.34926	3.12268	2.73056	2.95869	3.24014	3.01938	2.94208	3.14492	3.35467	3.35899
OG0003320	Lthed_scf0040.1_g103400.1	Qgl_scf0050.1_g038120.1	NA	NA	IV	2.19217	1.33101	2.41807	1.8573	2.52406	2.43019	2.78247	3.10601	2.80565	2.70389	2.96396	2.99777	2.59072	2.29948	1.84047	2.01388	2.35503	1.97233	2.57074	2.42461	2.77449	2.95819	2.94828	2.17357	2.9715	3.26861	2.65393	2.4712	2.27761	2.0453	2.10017	2.00562	2.09232	2.5016	1.97217	2.26454	2.0503	2.04767	3.00141	2.71371	2.50641	2.44442	1.97418	1.96751
OG0003325	Lthed_scf0040.1_g124680.1	Qgl_scf0050.1_g016120.1	AT4G26690.1	AT4G26690.1	III	5.4956	5.66258	5.11348	5.9184	5.60293	5.39955	5.03404	4.91619	4.74961	4.35475	4.98718	5.71434	5.54036	5.48119	5.27168	4.91357	4.40976	4.82956	4.7766	4.56615	3.85507	3.73351	3.10361	3.81914	4.40773	5.05546	5.02381	5.21192	5.59574	6.01912	5.09053	5.32798	5.1621	4.13764	5.26135	5.72592	4.85022	6.2598	4.98195	5.84304	5.90607	5.25713	5.42515	5.30101
OG0003326	Lthed_scf0010.1_g092040.1	Qgl_scf0020.1_g088430.1	AT5G40380.1	AT5G40380.1	IV	0.420395	1.36483	0.453179	0.937388	0.472012	0.181854	0.199025	0.436225	0.939842	0.734781	0.650116	0.635709	0.48365	0.811472	0.440883	0.759829	0.851026	0.768074	0.718665	0.406455	0.536857	0.242651	0.523298	0.404898	0.578418	0.468758	0.559676	0.984538	0.800324	1.17197	0.828846	0.791542	0.563224	0.560847	0.727466	0.817364	1.29647	0.870333	0.885052	0.830174	0.591763	1.42422	0.894832	1.32438
OG0003330	Lthed_scf0010.1_g099930.1	Qgl_scf0020.1_g094800.1	AT2G18410.1	AT2G18410.1	III	2.98552	3.20776	3.34968	3.1629	3.13668	2.87245	3.2234	2.93246	2.58587	2.69915	3.076	3.78209	2.99303	3.02156	2.51733	2.76818	3.2757	3.09555	3.12969	2.94024	2.43062	2.44939	2.59983	2.2223	2.76999	3.35005	2.65912	3.07076	2.86579	3.13769	2.81157	3.02409	2.93179	2.62254	1.47884	1.7866	2.03435	2.03277	2.5178	3.37086	3.15706	2.78443	2.76288	2.52944
OG0003341	Lthed_scf0040.1_g059520.1	Qgl_scf0050.1_g075280.1	AT2G19130.1	AT2G19130.1	III	4.08625	4.25369	4.42729	4.2395	4.21475	4.55622	3.93614	4.09431	4.42368	4.03315	4.10572	3.36113	3.77008	3.60559	3.8207	4.41549	4.67939	4.54187	4.49569	4.5739	4.32112	4.187	4.25419	3.88306	4.42331	3.62787	4.12808	3.28418	3.41808	3.75922	3.53822	3.71442	3.78889	3.26207	3.68443	3.75883	3.74728	3.55386	3.02009	2.76444	3.49878	3.41168	3.74478	3.77417
OG0003344	Lthed_scf0080.1_g105400.1	Qgl_scf0070.1_g006670.1	AT2G26460.1	AT2G26460.1	III	5.23611	4.85652	4.8704	5.35644	5.14313	5.02019	5.2175	5.67989	5.72513	5.5912	5.70485	5.62992	5.18997	5.31458	5.10204	5.16458	5.13286	5.0106	5.42802	5.37629	5.60194	5.81032	5.62393	5.82532	5.4291	5.50458	5.28238	5.57815	5.66202	5.56767	5.72141	5.75366	5.54458	5.82017	6.00383	5.94354	5.95653	5.76065	5.9058	5.62494	5.6757	5.69554	5.74844	5.63831
OG0003348	Lthed_scf0010.1_g030220.1	Qgl_scf0020.1_g029550.1	AT3G33530.1	AT3G33530.1	I	2.95857	2.71221	2.98318	2.83646	2.86061	2.9783	3.04229	2.97649	2.73402	2.50494	2.63879	2.70405	2.82765	2.96742	2.54433	2.99117	3.06589	3.05949	3.05965	2.89878	2.68279	2.60449	2.39484	2.47495	2.59059	2.63836	2.4633	2.78578	2.97377	2.93823	3.19975	3.08737	2.86283	2.7144	2.60532	2.48651	2.4519	2.4152	2.30943	2.73631	2.95329	2.89894	2.92597	2.82936
OG0003437	Lthed_scf0080.1_g017250.1	Qgl_scf0070.1_g097220.1	AT2G21290.1	AT2G21290.1	III	5.97651	5.85544	5.25423	5.5899	5.99745	5.64602	5.41304	5.01567	5.87928	5.80217	5.36648	5.88576	4.44814	4.98067	4.44535	4.6555	3.92167	4.37611	4.7218	4.66228	4.68991	3.9914	3.57272	3.31791	4.44669	4.464	4.69187	2.51838	1.52227	2.21422	1.71043	0.926823	1.22037	1.33241	1.63995	0.558872	1.67968	0.985354	1.08387	1.95439	2.01048	0.473939	0.49739	2.65542
OG0003445	Lthed_scf0090.1_g026800.1	Qgl_scf0060.1_g086350.1	AT5G51300.3	AT5G51300.3	V	2.08536	2.19948	2.07614	1.88089	1.89073	1.85985	1.93576	1.57626	1.34801	1.4699	1.56459	1.85084	2.1862	1.98557	1.59255	1.78745	2.17524	2.02102	1.94544	1.78748	1.46675	1.14106	1.29664	0.944927	1.5807	1.48713	1.67228	1.43436	1.70105	1.50456	1.41658	1.51637	1.40066	1.38449	0.739159	0.371329	0.567718	0.40977	1.60875	1.68874	1.72342	1.72913	1.68526	1.58328
OG0003455	Lthed_scf0110.1_g003750.1	Qgl_scf0110.1_g080970.1	AT3G10310.2	AT3G10310.2	I	0.826672	0.580743	0.750835	1.27695	1.16499	0.557531	1.57018	1.00854	0.274972	0.323309	0.455875	2.52416	1.95964	1.64736	0.880506	0.819066	0.570454	0.678237	1.70671	1.47248	1.28	0.591514	0.595742	0.391968	0.655105	3.10691	1.46606	1.40494	1.67317	1.36763	1.15965	1.25311	1.01267	0.781058	0.576137	0.889038	0.465239	0.906085	1.79485	2.28212	2.08405	1.04397	0.714316	1.16547
OG0003464	Lthed_scf0120.1_g017420.1	Qgl_scf0120.1_g013460.1	AT1G21270.1	AT1G21270.1	V	2.04363	1.70265	1.62336	0.939577	1.32179	1.50974	0.485714	0.675424	0.345022	0.643236	1.07347	0.528015	1.94468	1.03305	1.33292	2.25521	2.14201	2.08373	1.0238	0.827705	0.422538	0.519523	0.298618	0.40954	0.983697	0.604466	1.78028	0.943628	1.69748	1.51817	1.37384	1.55089	1.43728	0.692473	0.37394	0.222784	0.306796	0.60677	1.08363	1.3311	1.49417	1.90093	2.0831	2.16796
OG0003519	Lthed_scf0040.1_g055000.1	Qgl_scf0050.1_g078550.1	AT1G03620.12	AT1G03620.12	I	1.95137	2.25062	1.98837	2.60097	1.4786	2.41139	2.22594	1.27504	0.286907	0.515929	1.19805	1.83488	1.98808	2.01927	1.47299	2.04799	2.1085	1.95081	2.14603	1.91973	1.48458	0.767679	0.448622	0.210121	0.957863	1.84447	1.49495	2.20951	2.35029	2.30906	1.6395	1.80312	1.87652	1.29359	0.414407	0.210676	0.370654	0.592957	1.06728	2.12537	2.3936	1.60874	1.62361	1.55826
OG0003523	Lthed_scf0060.1_g107720.1	Qgl_scf0090.1_g016270.1	AT3G02830.1	AT3G02830.1	IV	5.18942	5.19065	5.28403	5.2702	5.02768	5.01983	5.33956	5.64723	5.51195	5.70112	5.62902	5.04086	5.44273	5.59692	5.59457	5.35263	5.48551	5.25837	5.52223	5.23642	5.94574	5.58901	5.70032	6.03472	5.37438	5.111	5.69187	6.14539	5.73483	5.05057	5.38942	5.24633	5.19825	5.85512	6.19098	6.31281	6.42702	6.14859	6.16684	5.90678	5.76044	6.17381	5.16968	6.07304
OG0003524	Lthed_scf0010.1_g198180.1	Qgl_scf0020.1_g191800.1	AT5G26010.1	AT5G26010.1	I	1.40059	1.02693	1.57294	1.77748	1.83281	1.10082	1.40534	0.426744	0	0	0.78028	1.57873	1.92202	1.46783	1.2457	1.54921	1.36373	1.74244	2.27794	1.81604	1.60083	0.86295	0.878014	0.569807	1.22969	2.16891	1.67464	1.96837	1.50686	1.33795	1.28872	1.0037	0.92078	0.813188	0.390202	0.192123	0.134466	0.481012	2.00175	1.96331	1.70124	1.64084	0.780352	1.5367
OG0003525	Lthed_scf0080.1_g066500.1	Qgl_scf0070.1_g048800.1	AT2G22570.1	AT2G22570.1	III	6.17978	6.35377	7.37416	6.35471	7.29754	7.12839	6.26011	5.42056	5.8512	6.64184	6.21647	4.93483	5.3482	6.32064	7.16864	6.49928	7.34997	6.61911	5.42038	5.89024	5.22116	5.83319	6.24541	5.78571	6.25769	4.53351	5.8976	6.72476	6.72036	6.77375	6.42165	6.88179	6.87972	6.52643	6.03775	6.19729	6.52282	6.38152	6.11874	6.41245	6.32652	6.31457	7.1012	7.1086
OG0003526	Lthed_scf0010.1_g154850.1	Qgl_scf0020.1_g162810.1	AT1G43790.1	AT1G43790.1	I	3.83058	3.31839	2.17659	1.72457	2.88647	2.0323	2.07347	2.42339	1.88079	0.834794	0	2.07059	3.43642	3.57266	4.47998	1.71256	1.10147	1.08753	1.60929	2.43783	1.9045	1.9158	1.60572	0.823867	0.175994	2.49692	4.4401	2.70632	2.11413	1.80251	1.84769	1.50517	1.94781	1.49935	1.42629	1.3558	0.735622	0.701496	1.08384	2.08144	1.93878	2.1915	2.52304	2.17534
OG0003528	Lthed_scf0120.1_g072910.1	Qgl_scf0120.1_g064230.1	AT1G78020.1	AT1G78020.1	II	4.84139	5.20669	5.33631	5.3063	5.46686	4.89497	5.50226	5.56208	5.81408	5.9874	5.68903	3.71152	4.86223	5.2501	6.04508	5.71386	5.44981	5.12652	4.75888	5.02274	5.6244	5.78175	5.8768	5.84226	5.96088	3.83209	5.23735	5.40207	5.50941	4.81425	5.69592	5.95725	5.55813	6.18987	5.37925	6.21244	6.72538	5.90424	5.00784	5.02437	4.83521	5.18619	5.41961	6.41897
OG0003529	Lthed_scf0090.1_g011180.1	Qgl_scf0060.1_g106640.1	AT3G49590.2	AT3G49590.2	IV	4.54143	4.57372	4.57951	4.65907	4.34801	4.50832	4.58106	5.20478	5.43873	5.82767	5.24518	4.1069	4.46763	4.84037	4.63763	4.53231	4.6567	4.58493	4.53627	4.77505	5.21822	5.88099	6.15354	6.90165	4.80571	4.19627	4.66789	4.64595	4.90389	4.77404	4.98962	4.96194	5.06172	5.47922	6.63806	6.74224	7.17869	6.46093	5.87343	4.93117	4.86896	5.03294	5.10394	5.15065
OG0003530	Lthed_scf0040.1_g051960.1	Qgl_scf0050.1_g086840.1	AT4G21470.1	AT4G21470.1	II	1.37682	3.41163	2.84177	1.41954	1.77906	1.81407	1.83612	2.05729	1.50972	0.870178	0.472793	1.31632	2.03327	1.81092	2.09231	1.38268	1.02539	1.5204	0.937362	1.35185	1.81444	1.2842	0.925519	0.507042	0.725109	2.34207	2.98566	1.82342	2.65757	2.27768	1.7854	2.87746	2.8816	2.04707	2.1148	1.58404	1.06638	1.54345	2.44094	2.55024	2.77289	1.2656	1.81146	1.87639
OG0003538	Lthed_scf0060.1_g011390.1	Qgl_scf0090.1_g113510.1	AT1G71110.1	AT1G71110.1	I	4.8084	4.72797	5.19439	4.76461	5.10487	4.83507	4.88426	4.72103	4.56385	3.92418	4.56542	4.50744	5.26667	5.3892	5.96625	5.27948	4.85907	4.74897	4.86833	5.03803	4.62819	4.30692	4.19842	4.31373	4.35573	5.76915	5.49508	6.66355	5.50057	4.85765	5.29383	5.23012	5.23162	4.90774	4.30479	4.70348	6.03014	6.18047	6.06348	5.84658	5.69695	5.18395	5.0548	5.18986
OG0003543	Lthed_scf0090.1_g064710.1	Qgl_scf0060.1_g046850.1	AT4G08320.1	AT4G08320.1	V	4.20892	4.628	3.68334	4.79567	4.1382	3.86769	4.55613	4.70085	4.86218	4.89883	4.70103	4.65043	4.51173	4.48493	4.28436	4.33058	3.93901	3.48478	4.71973	4.83565	4.77734	5.01947	5.0039	5.22087	4.85781	5.02125	4.68449	4.97059	5.02475	4.82261	5.14571	4.99129	4.98786	5.29485	5.70082	5.73735	5.57965	5.58837	5.32952	5.16488	4.88817	5.23519	5.13775	5.11683
OG0003544	Lthed_scf0090.1_g038950.1	Qgl_scf0060.1_g072410.1	AT5G16680.2	AT5G16680.2	III	4.85309	5.07458	5.42797	5.1855	5.09256	5.23225	5.06269	5.50721	5.48958	5.91814	5.71619	5.02753	4.57322	4.77173	5.09745	5.43852	5.79374	5.28244	5.37019	5.40523	5.89256	5.90604	6.06812	6.29123	5.70034	4.8822	4.63329	4.75012	4.68078	4.66093	4.97733	4.75797	5.00102	5.0156	5.44733	5.46344	5.67782	5.44212	5.42568	4.75367	4.36779	5.02313	5.01857	4.96955
OG0003546	Lthed_scf0090.1_g011770.1	Qgl_scf0060.1_g105890.1	AT1G44800.1	AT1G44800.1	V	0.59584	0	0	0.480008	0.490276	0.639439	0.800143	0.619585	0.414584	0.217502	0	1.34944	0.276165	0.218204	0.129067	0.261767	0.659008	0.288672	0.667413	0.718857	0.78636	0.550395	0.808384	0.479945	0.715211	2.71839	0.684423	0.546287	0.187063	0.0697355	0.239111	0.183094	0.0725062	0.189348	0.0833031	0.213286	0.0462717	0.0410849	0.414826	0.382892	0.260461	0	0.135038	0.0700507
OG0003548	Lthed_scf0090.1_g013220.1	Qgl_scf0060.1_g104480.1	AT5G24500.1	AT5G24500.1	V	3.75597	3.08453	3.63157	3.49822	3.53971	3.29519	3.55169	3.68318	4.50586	3.41087	3.52636	3.84826	3.12219	3.33555	2.6045	3.08367	2.45031	2.57546	3.28092	3.53419	3.86909	3.50016	3.41686	3.43689	3.33793	3.09742	3.46421	3.77805	3.812	3.58939	3.70988	3.83241	3.3658	4.04413	4.21968	4.15105	3.33928	4.2477	3.76725	3.48969	3.91591	3.98388	3.64964	3.34221
OG0003551	Lthed_scf0050.1_g073490.1	Qgl_scf0040.1_g081030.1	AT2G01600.1	AT2G01600.1	III	5.62561	5.59684	6.20802	5.73578	5.82128	5.88755	5.7248	5.47064	5.4417	5.7657	5.52553	5.74806	5.62695	5.94328	5.91019	5.69027	6.2048	5.73763	5.46803	5.39138	5.20279	5.50176	5.6042	5.58494	5.5754	5.54779	5.47391	5.28112	5.40326	5.59207	5.54482	5.49536	5.43502	5.10303	5.25193	5.49151	5.5682	5.175	4.91947	5.29917	5.4161	5.04601	5.31835	5.41059
OG0003552	Lthed_scf0050.1_g072260.1	Qgl_scf0040.1_g079300.1	AT1G70670.1	AT1G70670.1	V	4.5454	4.82094	3.79681	5.16444	3.47631	3.87871	4.96543	6.64049	7.07031	6.71532	5.62232	4.67387	5.20893	4.32679	4.83763	4.13186	4.22838	4.3858	5.24501	5.18393	6.78707	6.91891	7.15121	8.79247	5.79105	5.21764	5.04316	5.47693	4.95778	4.11748	5.45693	5.37904	5.43804	7.00532	8.51985	8.86283	7.77254	6.83388	6.23266	5.60305	5.8496	6.13555	5.59912	6.09621
OG0003553	Lthed_scf0060.1_g005320.1	Qgl_scf0090.1_g096900.1	AT2G23940.3	AT2G23940.3	V	5.27967	5.11676	5.25216	4.51514	5.2163	5.14014	4.98556	4.97844	5.17229	4.95424	4.89396	4.98162	5.25928	4.97856	5.19063	4.929	4.90085	5.11354	5.03101	5.16605	5.18137	5.03259	5.22074	5.26333	4.79679	5.20129	5.19196	5.54358	5.48571	5.62107	5.60142	5.69478	5.74868	5.74607	5.94226	5.73638	5.78319	5.85354	5.7836	5.33198	5.74148	5.47064	5.78252	5.59069
OG0003555	Lthed_scf0050.1_g067330.1	Qgl_scf0040.1_g072790.1	AT1G14740.1	AT1G14740.1	III	4.75926	4.87389	4.55109	4.90639	4.8726	4.60944	4.59963	4.6605	4.98577	4.75624	4.75949	4.88312	5.29009	5.05716	5.06596	4.98013	4.66416	4.77171	5.14782	4.91326	5.18385	4.85223	5.11563	5.38897	5.037	5.01575	5.3742	5.6137	5.45427	5.35071	5.39261	5.14786	5.10179	5.12074	5.69849	5.74915	5.55303	5.72441	5.5185	5.40637	5.36481	5.46943	5.26651	5.55458
OG0003556	Lthed_scf0050.1_g066340.1	Qgl_scf0040.1_g072080.1	NA	NA	I	2.0273	2.44043	0.98355	1.99105	1.96738	1.41651	2.56542	1.2873	1.47122	0.578471	2.45595	3.41236	1.9791	2.03197	2.39337	1.27486	0.918208	1.5439	1.64749	2.49907	2.10942	1.95712	1.15516	0.586716	1.11162	2.5377	2.15736	1.71076	2.40016	2.06956	1.44711	1.29269	1.44294	1.02143	0.781388	0.138289	0.622874	0.602351	1.74241	2.01783	2.56235	1.914	1.5879	1.051
OG0003559	Lthed_scf0050.1_g050220.1	Qgl_scf0040.1_g056670.1	AT3G19910.1	AT3G19910.1	IV	5.21223	5.21516	4.77335	5.09747	4.95625	5.08923	5.22542	5.42561	5.86938	6.14407	5.89439	5.29733	4.90636	4.45302	4.94186	4.84337	5.09127	4.69198	5.13068	5.27824	5.73293	5.96799	6.10604	5.88301	5.75252	5.3247	5.15588	5.33539	5.25424	4.93058	5.24156	5.02744	5.46721	5.52026	5.82511	5.85014	5.98328	6.19409	6.04285	5.31869	5.05801	5.27181	5.14788	5.32994
OG0003562	Lthed_scf0050.1_g067150.1	Qgl_scf0040.1_g072680.1	AT1G14720.1	AT1G14720.1	II	5.25994	5.28778	5.28348	5.30666	5.0939	4.53074	4.72338	5.75326	5.45786	4.68254	4.30134	5.12423	5.24546	5.3566	5.31464	5.24758	4.79342	5.01011	5.5381	5.3106	4.83497	4.71338	4.44946	4.8255	4.38955	5.79763	5.78773	5.12258	5.93205	5.81771	5.65169	5.54308	5.75223	4.89994	5.25655	5.5118	5.74753	5.3061	5.33065	6.1708	6.36083	5.99651	5.62359	5.63323
OG0003565	Lthed_scf0050.1_g024570.1	Qgl_scf0040.1_g031550.1	AT1G13130.1	AT1G13130.1	I	3.39357	3.87306	3.57029	3.79679	3.6642	3.7547	4.04829	4.40354	4.29595	4.49619	3.95834	2.98853	3.96867	3.89494	3.91401	3.85883	3.66038	3.69085	3.36612	4.13961	3.62682	4.20481	4.11991	3.96599	3.4436	3.19138	3.9296	4.1487	4.33559	4.31661	4.286	4.70981	4.679	5.10589	4.63647	4.31294	4.19149	4.05294	3.83659	4.34933	4.46292	4.52341	4.46583	4.63263
OG0003567	Lthed_scf0050.1_g023080.1	Qgl_scf0040.1_g029230.1	AT1G67850.7	AT1G67850.7	III	5.40062	5.29157	5.41166	5.29853	5.48544	5.11071	5.4117	5.4491	5.61427	5.34392	5.2489	5.3446	5.36628	5.39438	5.36894	5.3595	5.2703	5.3328	5.29686	5.4125	5.46613	5.53429	5.53375	5.95956	5.16586	5.79525	5.46217	5.4952	5.72859	5.55346	5.73208	5.53417	5.39506	5.81656	6.06053	6.26209	6.17762	5.86039	5.34408	5.38308	5.54075	5.5824	5.67473	5.41712
OG0003568	Lthed_scf0050.1_g019650.1	Qgl_scf0040.1_g026770.1	AT1G70520.1	AT1G70520.1	I	3.04979	2.9374	2.9041	3.55564	3.44805	3.07325	2.57853	2.92766	3.92397	3.4216	2.86706	2.98461	2.58052	2.80629	3.11258	3.35238	3.08211	2.5692	2.90342	3.22237	3.18134	3.2743	3.25687	4.01607	2.9315	2.66357	2.71562	3.05911	2.99713	3.19445	3.12204	3.18261	3.03223	3.01238	4.10777	3.64311	2.78366	2.62874	2.21336	2.43087	2.62197	2.59666	3.07961	3.0008
OG0003574	Lthed_scf0050.1_g016150.1	Qgl_scf0040.1_g018000.1	AT1G59640.1	AT1G59640.1	I	3.68846	3.55601	2.4502	3.38854	3.25018	3.18954	3.59506	3.61376	3.37371	3.21797	3.76963	3.53161	4.50814	3.4851	2.67998	3.0525	2.60856	3.10153	3.48471	3.20227	3.6411	3.63426	2.9986	2.52683	3.14537	3.98862	3.64293	3.52323	3.95686	3.9048	3.34349	3.10376	3.38654	2.79998	2.87238	2.61951	2.58167	3.27542	2.81917	4.59806	4.23674	3.03612	2.50335	2.54807
OG0003576	Lthed_scf0050.1_g013310.1	Qgl_scf0040.1_g014940.1	AT1G69780.1	AT1G69780.1	I	7.22505	6.66575	6.03572	6.52999	6.43128	5.74859	6.59806	6.63262	5.11519	4.81116	5.46861	5.98502	8.10996	7.90948	7.6888	6.54642	5.38167	6.13986	6.44762	6.51925	6.08009	5.75113	4.66892	3.86129	5.88511	6.2891	8.16243	7.55683	7.76493	7.27381	7.20665	6.84706	6.74392	6.03902	4.63724	3.27019	3.15273	4.35483	6.2843	7.6001	8.36268	8.10142	7.19438	7.30378
OG0003578	Lthed_scf0050.1_g009640.1	Qgl_scf0040.1_g011920.1	AT1G69530.2	AT1G69530.2	I	10.2959	9.10402	8.52026	8.63692	8.80899	8.20317	9.28984	8.66095	6.47815	5.68859	7.83504	9.01562	9.6865	9.0516	8.85704	8.3321	7.8866	8.28982	9.26667	8.82344	7.81999	6.00652	5.36229	5.22544	7.64316	8.80803	9.62037	10.2677	9.3418	8.24162	9.63641	8.58552	8.32308	6.5902	3.17607	2.21583	4.53687	6.5816	8.27695	9.8146	10.1286	8.78146	7.77299	8.26209
OG0003582	Lthed_scf0050.1_g001000.1	Qgl_scf0040.1_g001330.1	AT2G03780.1	AT2G03780.1	II	4.08703	4.75739	3.24602	4.19257	4.14372	3.91371	4.59244	4.41457	4.24793	3.71194	4.2858	4.67885	4.56956	4.4067	3.93522	3.95367	3.97109	3.69361	4.59905	4.39489	4.56862	4.2977	4.22222	3.79654	4.16818	4.68139	4.37995	4.41107	4.3743	3.92924	3.87054	4.07103	4.14697	4.44543	4.27284	3.9168	3.68765	3.9662	4.5222	4.49544	4.50213	4.50897	4.04657	3.9919
OG0003583	Lthed_scf0050.1_g000850.1	Qgl_scf0040.1_g001230.1	AT1G26300.1	AT1G26300.1	I	5.61426	5.53672	4.92115	5.5429	5.6338	5.09161	5.54045	5.46646	5.10236	5.30322	4.97394	5.59743	5.78062	5.50336	5.52101	5.37714	4.96186	5.43309	5.71399	5.64711	5.6569	5.61499	4.89992	5.24909	5.17391	5.25223	5.60253	5.07149	5.70416	5.47977	5.67166	5.92589	5.76702	5.76462	5.30768	4.77171	4.15747	3.97334	4.41061	5.36741	5.67886	5.27007	5.45647	5.4611
OG0003587	Lthed_scf0050.1_g031490.1	Qgl_scf0040.1_g039280.1	AT1G27390.1	AT1G27390.1	III	4.91782	4.77655	4.40219	5.44086	4.80004	4.60698	4.93933	6.11541	6.19638	5.5202	6.04161	5.99863	5.52677	5.12329	4.63157	4.55622	4.24214	4.46428	5.78173	5.4952	6.33099	6.31576	6.09155	6.071	5.67802	6.26945	5.25405	5.97124	5.81058	5.51892	5.71649	5.61968	5.79009	6.43665	6.61963	6.56482	6.43601	6.76133	6.84738	6.79763	5.97679	5.86885	5.20514	5.42014
OG0003588	Lthed_scf0050.1_g036610.1	Qgl_scf0040.1_g044260.1	AT5G43280.1	AT5G43280.1	V	5.95044	5.40241	5.79222	5.61301	6.05466	5.7667	6.04132	5.66585	5.51202	5.75201	5.58774	6.35502	5.87413	6.16891	6.06995	5.81631	6.01212	6.21345	5.57826	5.40988	4.9686	5.34318	5.46146	5.70332	5.54193	5.69939	5.43267	5.5262	5.60666	5.63394	5.63129	5.77871	5.62674	5.3959	5.05927	5.55961	5.43999	4.82496	4.693	5.32581	5.65516	5.31309	5.47666	5.89743
OG0003589	Lthed_scf0040.1_g023810.1	Qgl_scf0050.1_g113160.1	AT1G29880.1	AT1G29880.1	II	6.25386	6.09242	5.96938	6.13779	6.06937	5.89386	6.2627	6.07512	6.1083	6.3378	6.2029	6.49826	6.30392	5.86881	6.0238	5.91354	6.10662	5.94902	6.04294	6.21384	5.67722	6.25174	6.12825	5.99765	6.08436	6.31723	6.01725	5.84975	5.77084	5.893	6.04146	5.95052	6.04647	6.08612	6.29388	6.24618	6.12751	5.92261	5.66393	6.04023	5.95967	5.88002	5.78323	5.68193
OG0003590	Lthed_scf0050.1_g042210.1	Qgl_scf0040.1_g049280.1	AT1G28130.1	AT1G28130.1	I	0.89178	0.40513	0.917298	0.799586	0.312252	0.193726	0.212013	0.0487245	0.118292	0	0.099866	0.178512	1.5907	0.468729	0.637396	0.902328	0.311906	0.529349	0.158591	0.179624	0.0500046	0.0952269	0	0	0.188752	0.4354	1.11639	0.374063	0.20753	0.771976	0.14294	0.110125	0.0763467	0.0937966	0	0	0	0.041767	0.179512	0.236766	0.617622	0.799519	0.473919	0.523062
OG0003593	Lthed_scf0050.1_g046290.1	Qgl_scf0040.1_g052190.1	AT5G47870.1	AT5G47870.1	III	6.44056	6.47192	6.25538	6.21236	6.44116	6.02266	6.27319	6.32837	6.5366	6.33661	6.43865	6.21478	6.52482	6.37323	6.46432	6.25342	6.2689	6.24889	6.44123	6.33915	6.38595	6.59172	6.18932	6.59276	6.46003	6.29389	6.65499	6.0961	6.0013	5.81666	5.92034	6.1471	5.88606	6.12845	6.26985	5.87592	5.95869	5.87159	6.24282	6.16454	6.13133	5.95223	6.01167	5.99754
OG0003595	Lthed_scf0080.1_g001710.1	Qgl_scf0070.1_g116310.1	AT4G35310.2	AT2G17290.2	IV	6.31117	6.37302	6.15958	6.345	6.19318	6.13931	6.2405	6.18224	6.264	6.35695	6.0971	5.77186	6.32711	6.32029	6.32493	6.35273	6.45772	6.41908	6.38485	6.23483	6.21891	6.28475	6.33314	6.63935	6.03916	6.0858	6.28598	6.31322	6.40652	6.48841	6.59965	6.41828	6.47891	6.15684	6.78258	6.96542	6.77398	6.47966	5.98766	6.19316	6.48901	6.35395	6.36232	6.51553
OG0003596	Lthed_scf0040.1_g030230.1	Qgl_scf0050.1_g107630.1	AT2G45480.1	AT2G45480.3	III	3.97716	3.72553	4.14859	4.80727	4.53871	4.77673	4.7545	5.04655	5.27106	5.3727	5.97524	5.37039	4.16407	3.99746	5.10428	4.77147	4.45477	3.94631	4.58547	5.09218	5.27326	5.41073	5.55143	5.15638	5.71736	4.87865	4.20794	3.57087	3.94061	3.96776	3.79856	3.93716	3.89503	4.14841	4.69678	4.63823	4.64642	5.47834	4.97501	4.32186	3.32187	3.53619	3.70318	3.65159
OG0003597	Lthed_scf0080.1_g006840.1	Qgl_scf0070.1_g109700.1	AT4G35140.2	AT4G35140.2	III	2.39425	1.85145	2.05121	2.56603	2.04511	1.78087	1.93622	2.4463	2.73105	2.70405	2.73943	1.99455	2.13579	2.36111	2.0605	1.87743	1.67136	1.83627	1.89876	2.0426	2.37758	2.82064	2.85489	1.89077	2.27468	2.39565	2.07416	1.94597	1.98921	1.82451	2.12439	1.97616	1.7269	2.56876	2.38256	2.34811	3.06248	2.56856	2.65878	2.19171	2.06151	2.12265	1.80831	2.06013
OG0003598	Lthed_scf0080.1_g007960.1	Qgl_scf0070.1_g107750.1	AT4G38510.5	AT4G38510.5	III	6.52931	6.19204	5.77742	6.15121	6.00854	5.96503	6.28568	6.8262	6.99106	6.95689	6.87779	6.56079	6.62657	6.74262	6.52212	6.1652	6.2848	6.17068	6.44251	6.51557	6.62516	7.01779	6.81673	7.06103	6.69909	6.64759	6.62854	6.52632	6.43997	6.4779	6.495	6.64328	6.37634	6.65968	6.87411	7.1447	7.38299	7.29989	6.80621	6.61943	6.65672	6.32895	6.45159	6.10289
OG0003601	Lthed_scf0080.1_g011840.1	Qgl_scf0070.1_g103970.1	AT4G34950.1	AT4G34950.1	IV	4.4637	5.67236	4.85287	6.33979	5.36973	4.9077	5.7638	7.57602	7.60684	7.64045	7.89196	6.26639	4.0545	5.3663	7.10761	4.05541	3.9056	3.84721	5.17816	5.66275	7.19311	7.26234	8.20695	8.20435	6.0453	5.55949	5.572	7.06694	6.04543	5.76266	7.09577	6.6618	6.71465	7.30049	7.83263	7.62478	8.05914	6.82213	8.15461	6.37522	5.63219	6.54552	6.72458	7.57111
OG0003603	Lthed_scf0080.1_g014950.1	Qgl_scf0070.1_g099530.1	AT4G38770.1	AT2G21140.1	I	5.60683	5.91099	6.03926	6.20543	6.18402	6.88918	6.97887	7.3756	5.60043	5.80502	6.13562	7.08151	5.29105	4.17457	2.71092	6.47428	6.25088	6.80228	7.62453	7.16842	7.00652	5.6505	5.3103	5.62417	5.03647	7.49902	5.33816	2.22569	4.2323	5.24648	4.9317	4.13447	6.04406	3.16185	3.31998	0.850042	0.865762	1.39351	2.68748	3.96934	3.80663	3.12346	3.39005	2.96936
OG0003604	Lthed_scf0080.1_g017060.1	Qgl_scf0070.1_g097400.1	AT2G21240.2	AT2G21240.2	III	4.69143	4.41253	4.95275	4.72729	4.78138	4.88476	4.8368	4.60625	4.53387	4.60143	4.94523	4.77327	4.6928	4.8082	4.73441	4.9774	5.07101	5.036	4.76604	4.92443	4.92566	4.92732	4.84356	5.28769	4.31893	4.72201	4.70785	4.53471	4.64991	4.84124	4.79468	4.7401	4.8047	4.59151	4.87824	4.91955	5.43566	5.17138	4.84559	4.58549	4.59012	4.69491	4.60349	4.46253
OG0003605	Lthed_scf0080.1_g019090.1	Qgl_scf0070.1_g094670.1	AT4G39100.1	AT4G39100.1	V	6.13974	6.3302	6.21366	5.76125	6.36794	6.24638	6.01969	4.52903	4.97795	5.19882	5.25178	4.99319	5.43705	6.18975	6.93708	6.46121	6.77108	6.2367	5.49009	5.51433	4.51128	4.73809	5.40309	5.14129	4.70937	4.53679	5.56772	5.59032	5.49854	5.6603	6.0505	5.77801	5.99074	5.03646	3.92134	4.73219	5.06365	3.97691	4.22837	4.67771	5.30542	4.97434	5.6965	6.13011
OG0003606	Lthed_scf0080.1_g019900.1	Qgl_scf0070.1_g092810.1	AT4G39150.3	AT4G39150.3	III	5.73935	5.51763	5.21677	5.44118	5.65823	5.34381	5.40378	5.19821	5.24806	4.65033	5.05576	5.16107	5.51948	6.07698	5.52023	5.45496	5.29673	5.29316	5.46432	5.32534	4.96113	5.08917	4.70998	5.09183	4.51774	5.03121	5.57429	5.03418	4.93701	5.24669	4.98153	5.14788	4.98893	4.51427	4.86213	4.71794	4.62872	5.2128	4.80591	5.27691	5.17631	5.05677	5.13323	5.02251
OG0003607	Lthed_scf0080.1_g019950.1	Qgl_scf0070.1_g092770.1	AT2G21520.1	AT2G21520.1	I	6.08104	6.12991	6.01599	6.17846	6.0703	6.1438	6.60881	6.80115	6.78821	6.77457	6.67264	6.67447	6.41836	6.21631	6.00084	5.98535	6.28279	6.26532	6.50013	6.49495	6.95017	6.98703	6.88975	6.8124	6.60068	6.8717	6.29698	6.66285	6.71222	6.42925	6.67181	6.60308	6.60668	7.03684	7.33897	7.4264	7.50235	7.37816	7.08943	6.81617	6.59636	6.73432	6.29049	6.44017
OG0003608	Lthed_scf0080.1_g021210.1	Qgl_scf0070.1_g091410.1	AT1G19440.1	AT1G19440.1	I	5.72559	5.83188	6.04623	5.01736	5.60229	6.11555	5.01065	3.6254	3.49415	3.04155	2.73748	3.74428	4.99993	6.01301	5.46267	5.8752	6.26312	5.94572	5.00732	5.29881	3.32389	3.06821	3.15151	2.25541	2.75432	2.99386	5.79791	3.82905	4.83984	5.29547	4.81246	5.17001	5.17971	2.68071	2.27426	0.965251	0.961171	0.80228	0.906283	2.13515	4.79697	5.16353	6.41744	5.42712
OG0003610	Lthed_scf0080.1_g024610.1	Qgl_scf0070.1_g086770.1	AT2G16070.2	AT2G16070.2	V	3.47973	3.48033	3.89659	4.01638	3.73504	3.5388	4.2682	4.57149	4.26429	4.43869	4.24844	4.15886	3.39118	3.50149	3.379	3.51451	3.20179	3.53627	3.84712	3.82792	3.85098	4.07279	4.28341	3.67857	4.38383	4.43598	3.1243	3.65496	3.32022	3.37221	3.24157	3.02995	3.37095	3.73308	3.6071	3.07991	4.03927	3.95306	4.16764	4.37836	3.24828	3.71462	3.25748	3.66331
OG0003612	Lthed_scf0010.1_g009060.1	Qgl_scf0020.1_g010100.1	AT1G71900.1	AT1G71900.1	I	4.9446	4.99933	4.34987	5.08745	4.41	4.54505	5.15659	5.07976	4.86758	4.91672	4.62914	5.14216	5.60652	5.04286	4.5	4.61926	4.43702	4.6125	5.19454	4.98226	5.03002	4.9763	4.68759	4.92922	4.50392	5.44696	5.29077	5.57201	5.58119	5.25575	5.28858	5.22953	5.30428	5.2604	4.85469	5.27337	5.12021	4.9053	5.06898	5.43051	5.64502	5.39626	5.12115	5.08172
OG0003616	Lthed_scf0010.1_g011750.1	Qgl_scf0020.1_g012350.1	AT1G68140.4	AT1G68140.4	IV	5.07018	4.70835	4.86776	5.19044	4.87309	4.87212	5.32952	4.81377	4.93052	4.70791	5.00846	5.16758	5.06504	4.73563	4.98947	4.94157	4.55179	4.9474	5.10371	5.27094	5.0539	5.03668	4.79921	5.23325	4.76815	5.01973	5.23238	5.12037	5.39543	5.38862	5.37596	5.44299	5.25163	5.05477	4.98004	5.3747	5.14305	5.24192	4.8181	4.91172	5.24732	5.3144	5.37705	5.2055
OG0003617	Lthed_scf0080.1_g075770.1	Qgl_scf0070.1_g036480.1	AT1G36990.1	AT1G36990.1	IV	3.66688	3.87783	4.33339	3.44963	3.91758	4.03533	3.58231	4.60166	4.7554	4.62755	4.47812	3.4666	3.47157	3.22533	4.12855	3.87462	4.29774	3.96989	3.7376	3.75486	4.56942	4.52257	4.74642	4.94196	4.57287	3.53959	3.63458	3.78525	3.59307	3.58509	3.9969	3.75989	3.78665	4.06908	4.61991	4.6534	4.94968	4.82444	4.76796	3.93017	3.33262	3.79364	3.95431	3.64081
OG0003619	Lthed_scf0080.1_g075000.1	Qgl_scf0070.1_g037900.1	AT5G16620.1	AT5G16620.1	II	4.76112	4.7563	4.96519	4.80956	5.05248	4.9039	4.85778	4.78683	4.74152	5.2422	4.96869	4.89622	4.52134	4.59334	4.72976	4.73259	5.05982	4.74838	4.79744	4.91766	4.87767	5.18979	5.03321	4.8136	5.16155	5.01815	4.54668	4.83929	4.94858	5.26584	5.20881	5.40179	5.1568	4.96519	4.94239	4.64726	4.38586	4.41131	4.84194	5.25224	5.00383	4.9669	5.35027	5.16713
OG0003622	Lthed_scf0080.1_g068910.1	Qgl_scf0070.1_g046210.1	AT5G64330.1	AT5G64330.1	II	3.88784	3.76504	4.12664	3.73309	4.00797	3.97865	3.77303	2.71677	3.06589	3.25807	3.78267	2.86755	3.8829	3.49602	3.97896	4.22551	4.6952	4.17265	3.58273	3.65566	2.89677	3.05132	2.96951	2.71174	3.55553	2.86767	3.70609	3.99985	3.6661	3.93075	4.26404	4.25412	4.07659	3.4057	3.3198	3.37113	4.07156	4.07419	4.95569	3.75774	3.96661	4.11333	4.35597	4.25502
OG0003623	Lthed_scf0080.1_g067950.1	Qgl_scf0070.1_g046770.1	AT4G33580.3	AT4G33580.3	I	4.37741	4.28688	3.6993	3.77206	4.02723	3.95275	4.00945	4.0386	4.31266	3.77465	3.53521	4.05696	4.36731	4.0906	2.86514	4.00678	4.03149	4.16936	3.81375	3.79934	3.37621	3.79677	3.12524	2.88424	3.77321	3.48885	4.15374	2.8021	3.83682	4.12971	3.49459	4.11281	4.13521	3.79613	3.65147	2.97142	3.31158	3.08695	3.18556	3.23529	4.47519	4.02448	4.1953	3.51025
OG0003624	Lthed_scf0080.1_g066080.1	Qgl_scf0070.1_g049150.1	AT1G51600.2	AT1G51600.2	III	5.54456	5.49874	5.40891	5.4005	5.4604	5.38042	5.67321	5.687	5.65871	5.56469	5.6849	5.61378	6.13289	5.99236	5.76133	5.52042	5.51196	5.56066	5.60482	5.4423	5.44393	5.5429	5.56062	4.93157	5.63546	5.54294	6.04701	6.32132	6.01528	5.36229	5.74353	5.74778	5.4385	5.87653	5.51903	5.83206	5.95344	6.04875	5.92216	6.01494	6.01862	6.12507	5.50595	5.69324
OG0003628	Lthed_scf0080.1_g049220.1	Qgl_scf0070.1_g063050.1	AT3G19640.1	AT3G19640.1	IV	5.45512	5.2327	5.26169	5.45176	5.36749	5.24183	5.79977	6.19881	6.34305	6.4911	6.31213	5.43742	5.4941	5.67434	5.69477	5.53298	5.59622	5.38128	5.65834	5.7041	6.06556	6.32594	6.37603	6.55294	6.20071	5.63044	5.50522	5.97414	5.83931	5.5373	5.77243	5.67389	5.85	6.10504	6.44968	6.70861	6.88534	6.65106	6.56049	6.00247	5.60931	5.8829	5.66834	5.98871
OG0003629	Lthed_scf0080.1_g045510.1	Qgl_scf0070.1_g066150.1	AT2G14835.2	AT2G14835.2	III	5.60001	5.21319	5.74754	5.4567	5.2877	5.51381	5.84159	5.77357	5.56853	5.44947	5.52637	5.96467	5.84372	5.62601	5.24635	5.52552	5.5706	5.58134	5.86093	5.6934	5.69363	5.68788	5.28714	5.4413	5.48756	6.1067	5.70641	5.69125	5.5904	5.42154	5.51412	5.50582	5.57628	5.84202	5.44227	5.43291	5.43781	5.3332	5.71965	6.09015	5.74856	5.65187	5.18824	5.3714
OG0003631	Lthed_scf0080.1_g034850.1	Qgl_scf0070.1_g075110.1	AT4G34100.2	AT4G34100.2	V	5.41874	5.61717	5.9124	5.45233	5.55292	5.76462	5.72286	5.85575	6.13303	6.58153	6.12293	5.03384	5.34281	5.62959	5.80002	5.81257	6.40461	6.02113	5.62744	5.64807	5.95149	6.28801	7.0297	6.80816	5.9578	5.06077	5.33258	5.59774	5.57903	5.74261	5.91346	5.92926	6.04312	5.92858	6.3632	6.63291	7.13744	6.47405	5.70029	4.9661	5.37132	5.49816	5.95504	6.14481
OG0003632	Lthed_scf0010.1_g008130.1	Qgl_scf0020.1_g009570.1	AT4G24330.1	AT4G24330.1	I	6.43741	6.27356	6.29653	6.55789	6.42251	6.3426	6.68369	6.85846	6.94216	6.52713	6.58827	6.96149	6.63553	6.21486	6.15164	6.26115	6.49021	6.41821	6.61842	6.35831	6.75849	6.67306	6.61072	6.76199	6.29034	6.67859	6.30798	6.71061	6.48184	6.36628	6.67477	6.42801	6.37024	6.53412	6.32729	6.51418	6.58681	6.27849	6.17435	6.8561	6.48702	6.23932	5.96614	6.16467
OG0003633	Lthed_scf0010.1_g008100.1	Qgl_scf0020.1_g009550.1	AT1G15380.2	AT1G15380.2	I	6.63179	6.07864	5.99116	6.20827	6.28979	5.77088	4.54593	4.47816	4.79999	4.30261	4.22263	5.41521	7.67058	7.01767	6.86311	6.55466	5.68793	7.15868	5.66157	5.49854	4.777	4.90183	3.99356	5.18693	5.13328	6.03505	6.8363	7.89659	7.46078	7.41868	6.65006	6.24793	6.28405	4.80701	5.49409	5.67538	5.54996	7.32925	6.78601	7.09321	7.82416	7.29786	6.8965	6.73458
OG0003634	Lthed_scf0010.1_g007370.1	Qgl_scf0020.1_g008800.1	NA	NA	I	2.82491	2.32135	0.826324	2.08972	1.01987	0	0.458553	0.492627	0	0.314883	0	2.31422	4.52619	4.37076	3.85521	1.00732	1.0307	0.35097	0.475863	1.14515	0	0.200147	0.234246	0.231813	0.521629	1.76197	5.23435	4.0857	4.52518	3.62164	2.27124	2.37351	2.74126	2.20343	0.420807	0	0.354935	0.60792	3.50652	4.15982	6.21057	4.7594	4.50651	3.7516
OG0003637	Lthed_scf0060.1_g095960.1	Qgl_scf0090.1_g027030.1	AT1G13310.1	AT1G13310.1	V	4.09603	4.19789	4.40187	3.73737	4.25904	4.17934	3.86493	3.28924	3.37473	2.98707	3.53058	3.8996	4.15768	4.25983	4.59471	4.26718	4.48446	4.42013	3.47417	3.79056	3.56453	3.36109	3.76103	3.85439	3.22198	3.32756	4.24999	3.83855	3.99508	4.19651	4.26526	4.19628	4.28637	4.0038	4.10928	3.89741	4.39037	4.16445	4.32374	3.83328	4.35924	3.97485	4.19222	4.29749
OG0003638	Lthed_scf0060.1_g094860.1	Qgl_scf0090.1_g027300.1	AT1G25500.2	AT1G25500.2	III	2.40808	2.29729	2.93324	2.72919	2.89452	2.6973	2.50575	2.4604	2.5298	2.48978	2.35011	2.42339	2.70872	2.46325	2.37015	2.48414	3.08309	3.07478	2.30638	2.46961	2.25602	2.50839	3.20354	2.48562	2.41534	2.9973	2.49955	3.16073	2.9954	3.13307	2.94748	3.0424	2.58706	2.74006	2.4273	2.38105	2.09204	2.17413	2.64499	2.88413	3.06657	3.06137	2.84844	3.1056
OG0003640	Lthed_scf0010.1_g129370.1	Qgl_scf0020.1_g121860.1	AT1G22770.1	AT1G22770.1	IV	6.24508	6.73877	6.70905	6.62111	6.86567	6.56313	6.59118	6.54133	7.55411	7.54515	7.13871	5.93143	6.4105	6.75413	7.19655	6.77906	7.05396	6.37031	6.75097	6.88883	7.38876	7.51799	7.63357	8.23634	6.7122	6.0098	6.67341	6.91646	6.95909	6.37706	7.25012	6.99825	7.00081	7.4329	8.08469	8.39033	8.18901	8.09732	7.68179	5.90903	6.51575	6.89052	7.03871	7.02194
OG0003641	Lthed_scf0010.1_g129210.1	Qgl_scf0020.1_g121750.1	AT4G09810.1	AT4G09810.1	I	3.79878	4.00142	3.20286	3.89127	3.74519	3.62218	3.07755	3.66508	3.94577	2.62323	2.92884	4.12551	4.21416	3.82494	3.30023	3.73349	3.2685	3.65324	3.72782	3.86955	3.90173	3.16841	3.08438	3.25942	3.16662	4.50655	4.24167	3.97277	4.03823	4.1924	4.08239	4.10477	3.93746	4.12554	4.03468	3.5168	3.45215	3.50643	4.00083	4.51016	4.3432	4.04309	3.92656	3.6673
OG0003642	Lthed_scf0010.1_g154050.1	Qgl_scf0020.1_g163440.1	AT1G21480.1	AT1G21480.1	I	3.38336	3.62142	2.89791	3.12489	3.39061	2.89331	3.46879	3.55888	3.62857	3.31519	3.21488	3.65029	3.57076	3.30327	3.11015	3.11804	3.00721	3.41483	3.60656	3.44295	3.55482	3.5745	3.54062	3.19906	3.42419	3.65782	3.60817	3.25399	3.63572	3.56664	3.6881	3.54924	3.65864	3.62638	3.40367	3.63688	3.79508	3.30503	3.38738	3.55289	3.61345	3.44066	3.33784	3.42346
OG0003644	Lthed_scf0010.1_g198270.1	Qgl_scf0020.1_g191960.1	AT2G25970.1	AT2G25970.1	V	6.55414	6.66603	6.46652	7.18608	7.05059	6.79717	6.97547	6.987	7.10741	7.21388	7.24564	7.0862	6.59369	6.7309	6.73756	6.93568	6.79677	6.60544	7.02035	6.97475	7.18564	7.04592	7.11585	6.9374	7.18423	6.8028	6.52505	6.80273	6.7925	6.73069	6.87263	6.87538	6.8923	6.9472	6.99126	7.00256	7.12956	6.92078	6.59696	7.12514	6.54018	6.48347	6.24199	6.935
OG0003646	Lthed_scf0010.1_g195510.1	Qgl_scf0020.1_g189840.1	AT5G01450.1	AT2G38220.2	III	4.92498	4.7043	4.24795	4.63823	4.3289	4.32885	5.04449	4.76777	5.2417	5.08787	5.47861	5.22672	4.99419	4.97231	4.21465	4.87669	4.40146	4.79662	5.43077	5.28732	5.31017	5.09328	5.18608	5.07004	5.19801	5.36743	5.271	5.76327	5.71649	5.66411	5.16186	5.30759	5.21533	5.57578	5.26624	5.23894	5.7283	5.4188	6.29387	5.5382	5.29289	5.90716	5.24359	5.01017
OG0003647	Lthed_scf0080.1_g040000.1	Qgl_scf0070.1_g070580.1	AT1G54400.1	AT1G54400.1	I	1.93208	2.14631	0.268637	1.97571	0.904174	1.45723	3.18988	2.0067	1.64201	1.34987	0	2.49491	2.53182	1.81601	1.45051	1.24444	0.348701	1.20717	1.49095	1.48633	1.11733	1.14359	1.58076	0.918308	0.195582	2.36551	1.88769	1.42517	1.7658	1.45833	1.42005	0.94979	1.13979	1.09334	1.08501	0.477686	0.926961	0.450458	0.358485	2.13742	1.6947	0.622822	0.778043	1.44098
OG0003648	Lthed_scf0020.1_g133730.1	Qgl_scf0030.1_g044910.1	AT2G34780.1	AT2G34780.1	V	2.52538	2.48642	2.48811	2.3441	2.27142	2.31462	2.65845	2.65039	2.80464	3.00769	3.11159	2.71968	2.11124	2.08365	1.95349	2.53084	2.63247	2.55851	2.72418	2.58571	3.13242	2.86221	3.06976	3.18031	3.21221	2.9063	2.08334	2.66426	2.49429	2.46155	2.58026	2.60222	2.60629	2.77781	3.22384	3.26567	3.12939	3.23779	3.39763	2.82022	2.26071	2.43495	2.47207	2.39872
OG0003649	Lthed_scf0010.1_g192240.1	Qgl_scf0020.1_g186900.1	AT3G49180.1	AT3G49180.1	III	2.59413	2.92854	2.30796	3.21838	2.755	2.9138	2.96877	3.58393	3.24284	3.58497	3.51409	4.15075	2.80923	3.35613	2.30983	2.90729	2.78686	2.6727	3.34419	3.1409	3.63256	3.48041	3.2949	3.73601	3.37965	4.20026	2.84347	3.4916	3.20338	3.192	3.03833	3.08952	2.82009	3.21789	3.22157	3.25454	3.02254	3.49633	3.87034	4.04294	3.00713	3.22738	2.81619	2.76421
OG0003650	Lthed_scf0010.1_g191740.1	Qgl_scf0020.1_g186550.1	AT1G45249.1	AT1G45249.1	III	4.81624	4.1865	4.93297	4.07228	4.87466	5.11773	4.07566	4.28033	4.2837	4.72078	4.59891	3.12075	4.13131	4.6533	4.81892	4.57557	5.13115	4.54181	3.77101	4.39156	4.30631	4.74716	5.2005	5.13048	4.00847	2.7282	4.59725	4.28581	4.04098	3.6494	4.26191	4.40943	4.33	4.30069	4.75539	4.50245	4.66609	4.92445	3.07053	2.95395	3.88331	3.70937	4.26601	4.02466
OG0003651	Lthed_scf0010.1_g191540.1	Qgl_scf0020.1_g186400.1	AT5G42900.3	AT5G42900.3	IV	1.07901	2.10931	1.36201	3.8884	2.22411	2.32112	3.00638	5.34847	6.25744	5.9054	5.84335	3.66834	1.3442	1.38032	2.04594	1.96744	2.28563	1.49877	4.49958	3.85118	5.98574	6.1266	6.14442	6.70745	5.46094	4.26805	1.74989	4.22712	4.26247	3.30363	4.42487	4.15011	3.88033	5.93393	7.41138	7.21633	7.06754	7.35215	6.41091	5.23124	2.52186	4.66164	3.94807	4.72407
OG0003652	Lthed_scf0010.1_g189740.1	Qgl_scf0020.1_g184060.1	AT4G34310.1	AT4G34310.1	IV	1.60409	2.22768	2.12913	2.02331	2.08671	1.8191	2.09541	2.87893	3.02943	2.76479	2.93883	2.25123	1.75623	2.17104	2.11295	2.16866	2.10575	2.15098	2.33157	2.0969	2.46938	2.73965	3.0563	2.6332	3.01211	2.41108	1.5907	2.13505	2.20879	2.2216	2.36666	2.368	2.01551	2.6547	2.6778	2.91802	3.30469	3.0272	2.80033	2.25382	2.26609	2.32602	2.57217	2.42067
OG0003654	Lthed_scf0010.1_g188840.1	Qgl_scf0020.1_g182500.1	AT2G30440.1	AT1G06870.1	IV	5.21892	5.35458	5.34982	5.0379	5.11516	5.13418	5.0296	5.21635	5.34613	5.48539	5.20875	4.76544	5.32307	5.30837	5.25903	5.06542	5.15491	5.02407	4.73114	4.82491	4.88038	4.81584	5.40934	5.15833	4.9974	4.75814	5.04817	4.955	4.5888	4.6448	4.94081	4.76448	4.73285	4.92568	4.8044	5.60781	5.70974	5.25262	4.70552	4.44122	4.79918	4.66495	4.90217	4.89842
OG0003655	Lthed_scf0010.1_g185760.1	Qgl_scf0020.1_g179480.1	AT1G19330.2	AT1G19330.2	I	6.55298	6.445	7.02835	7.2316	6.80998	6.92478	6.88288	6.0696	5.36116	5.55617	5.64528	6.11105	6.67243	6.69685	6.5407	6.61806	6.64557	6.90728	6.80917	6.7634	6.51929	6.43484	5.76963	4.72729	6.22919	5.90101	6.66626	6.28821	6.5964	6.57594	6.34391	6.65824	6.58381	5.85455	4.69473	4.04099	2.89665	4.45617	5.24909	5.88258	6.78854	6.43236	6.18491	6.69129
OG0003656	Lthed_scf0010.1_g185710.1	Qgl_scf0020.1_g179380.1	NA	NA	III	4.82331	5.31278	4.99421	5.53688	5.0896	5.16577	4.88072	6.05756	6.55296	6.84963	6.39927	3.96768	4.62081	3.1981	5.21166	5.07283	4.79191	4.63252	4.86764	4.71304	5.04864	5.71953	6.3665	6.06561	5.66699	3.79702	4.64895	3.96588	3.99906	4.28436	4.5686	4.5773	4.69414	5.30938	5.33585	5.34045	5.59026	5.34795	4.95584	4.07284	4.09661	4.93566	5.28749	5.18866
OG0003657	Lthed_scf0010.1_g185300.1	Qgl_scf0020.1_g179210.1	AT1G80950.1	AT1G80950.1	IV	3.90801	4.08661	4.16528	3.80925	4.1136	4.08759	4.16963	4.02729	4.59236	4.43289	4.46843	4.37935	4.17237	4.02689	3.88812	3.75309	3.99352	3.7812	3.54481	3.98405	3.78472	4.23821	4.34327	4.30533	3.92535	4.21081	4.00676	4.5522	4.43543	4.33519	4.39346	4.25863	4.35633	4.31552	4.25851	4.64119	4.95401	4.72976	4.50412	4.51696	4.52603	4.12573	4.31072	4.32074
OG0003660	Lthed_scf0060.1_g090720.1	Qgl_scf0090.1_g030500.1	AT3G25860.1	AT3G25860.1	I	5.46961	5.23517	4.96536	5.22165	5.1374	5.09193	5.49432	5.45537	5.38924	4.53828	4.50851	5.88466	5.89666	4.97225	4.88861	5.21702	5.13735	5.37033	5.41454	5.2507	4.78189	4.62031	4.09446	4.23504	4.49357	5.73137	5.33374	4.96911	5.22367	5.44784	5.38623	5.59271	5.30843	4.9741	5.07641	5.03234	4.13448	4.58142	4.15953	5.46654	5.62336	5.02806	4.9382	4.91338
OG0003661	Lthed_scf0090.1_g062590.1	Qgl_scf0060.1_g049470.1	AT1G77490.1	AT1G77490.1	II	5.23318	4.79946	4.76639	5.01325	4.74835	5.20012	5.43783	5.78545	5.67014	5.46732	5.39725	6.00798	5.40884	5.18698	4.82916	4.96946	4.92415	4.97005	5.29879	5.56226	5.51868	5.75347	5.59884	5.10225	5.52462	5.80836	5.18068	5.26321	5.1479	5.18549	5.33343	5.67869	5.90203	6.0404	5.87485	5.2491	4.39729	4.74534	5.40499	5.67344	5.58309	5.19404	4.98461	4.96451
OG0003662	Lthed_scf0120.1_g019150.1	Qgl_scf0120.1_g014890.1	AT4G17510.1	AT4G17510.1	III	5.15829	5.22422	5.38925	5.0443	5.2738	5.17347	5.20393	5.35852	5.20214	5.31109	5.40208	5.5786	5.09627	5.30412	5.46965	5.16604	5.07506	4.85399	5.14601	5.39156	5.46046	5.54561	5.26468	5.50409	5.1004	5.34039	5.28179	5.27094	5.277	4.92633	5.35278	4.86877	5.18108	5.3199	5.63139	5.86604	5.9549	5.83177	5.44098	5.39304	5.0359	5.31966	5.37259	4.99019
OG0003663	Lthed_scf0110.1_g067130.1	Qgl_scf0110.1_g026990.1	AT2G25720.1	AT2G25720.1	III	5.70733	5.23391	5.10445	5.21782	5.02816	5.70765	5.56126	6.22636	6.05546	5.7366	5.96923	5.49339	5.18347	4.38372	5.56113	5.31843	5.82684	5.55152	5.33511	5.44885	5.45756	5.7879	6.16662	6.108	5.70695	5.84275	5.43796	5.15106	5.04607	4.84022	4.82504	4.9615	4.77301	4.95986	4.44381	4.61745	5.94245	5.02006	3.26389	5.39692	4.9861	4.22894	4.43126	4.65207
OG0003666	Lthed_scf0030.1_g000400.1	Qgl_scf0010.1_g192790.1	AT3G12670.1	AT3G12670.1	IV	2.89456	3.23788	2.29283	3.31354	3.14546	3.2187	3.75558	4.47549	4.91975	4.6718	4.49696	3.94497	3.11389	2.61531	2.44761	2.96479	3.29222	2.78315	3.48361	3.82269	4.45112	4.44741	5.24242	4.99495	4.23989	4.48713	3.10076	3.47202	2.92428	3.25858	3.61142	3.50642	3.33912	3.85706	4.11464	4.18361	4.80127	4.60521	4.57732	3.80716	3.32365	3.32052	3.27505	3.3476
OG0003668	Lthed_scf0070.1_g045050.1	Qgl_scf0080.1_g038200.1	AT1G74070.1	AT1G74070.1	II	1.4643	1.17175	0.190694	0.579781	0.456029	1.15559	0.422613	0.735596	0.242898	0.534102	0.622043	1.58109	2.889	1.37078	1.29802	0.689212	1.37673	0.763888	0.761942	1.20586	0.932343	0.836513	0.634425	0.713828	0.856814	2.14693	2.13653	1.3446	0.609509	0.663103	0.860231	0.750481	0.899849	1.44518	0.713202	0.396993	0.479145	0.418413	1.4208	1.46151	2.13889	1.30326	0.832705	1.02154
OG0003670	Lthed_scf0010.1_g099740.1	Qgl_scf0020.1_g094750.1	AT3G02560.3	AT3G02560.3	V	8.51432	8.58407	8.47484	9.23055	9.07358	8.60096	9.31997	9.6964	9.89698	9.62034	9.61417	9.92355	8.96905	8.74307	8.70153	8.5622	8.82242	8.62152	9.22582	9.26815	9.97783	9.77119	10.0718	10.0039	9.48298	10.0827	8.73937	9.57817	9.13507	9.12556	9.26961	9.32369	9.61911	9.79651	9.79583	9.49336	9.15321	9.41433	10.2164	10.2246	9.20544	9.15767	9.07835	9.23724
OG0003671	Lthed_scf0070.1_g050850.1	Qgl_scf0080.1_g044270.1	AT3G18270.1	AT3G18270.1	I	5.56456	5.207	4.53406	4.75146	4.36591	4.40248	5.22166	4.89658	4.51901	4.26031	4.73426	5.37753	5.29983	4.58834	4.58744	4.09861	4.31064	4.26489	4.60276	4.97852	4.7328	4.47543	3.91878	3.61246	4.9599	5.52296	5.63523	5.28067	4.97352	5.04535	3.99553	4.86375	4.08403	3.40282	2.76083	2.73849	3.3108	3.60864	4.55155	5.0916	5.69723	4.72616	4.74234	4.34611
OG0003672	Lthed_scf0070.1_g060010.1	Qgl_scf0080.1_g052030.1	AT3G17860.1	AT3G17860.1	II	4.1966	3.78654	4.00427	4.54883	3.35333	2.97982	3.22346	3.71451	3.27018	2.94372	3.29753	3.87408	5.39623	4.25281	3.57853	4.06163	3.77096	4.10628	4.39858	3.85095	3.99403	3.13136	3.27534	3.38844	4.10374	5.02663	4.79601	4.41725	4.53605	4.22977	4.01304	3.1123	3.54176	2.309	2.27486	2.66537	1.98335	3.84807	4.3485	5.11541	5.00318	3.98005	3.46203	2.9928
OG0003673	Lthed_scf0070.1_g060150.1	Qgl_scf0080.1_g052160.1	AT3G17850.1	AT3G17850.1	III	4.56033	4.614	4.53829	4.88434	4.51609	4.62258	4.56745	4.59064	4.26731	4.55304	4.3841	4.51299	4.51789	4.66329	4.51337	4.63939	4.60965	4.63897	4.55534	4.62556	4.77278	4.5529	4.68191	4.60217	4.47579	4.69562	4.44159	4.28068	4.31528	4.43874	4.5735	4.54558	4.57303	4.28776	4.56133	4.44163	4.45973	4.43182	4.42844	4.14626	4.31799	4.36646	4.41965	4.36976
OG0003674	Lthed_scf0070.1_g061990.1	Qgl_scf0080.1_g054120.1	AT1G48450.1	AT1G48450.1	II	5.81185	5.67267	6.12524	5.89007	5.94712	6.03397	5.85654	5.50578	6.16926	5.88539	5.74239	5.93246	5.76774	5.73701	6.05132	6.02003	6.31441	6.31123	5.61182	5.90382	5.7098	5.98866	6.03393	6.30428	5.79855	5.70112	5.98151	5.73145	5.65003	6.08111	6.10454	6.13147	6.05271	5.87278	6.07046	6.3411	6.31498	6.03971	5.66045	5.61453	6.03711	6.03282	6.21779	6.15679
OG0003675	Lthed_scf0120.1_g080410.1	Qgl_scf0120.1_g071450.1	AT1G09960.1	AT1G09960.1	III	4.70887	4.81718	4.62065	4.34708	4.40247	4.54778	4.92787	5.14705	5.54024	4.86654	4.51849	4.36425	4.84384	4.92258	4.67093	4.56285	4.66889	4.61994	4.59478	4.86791	4.60255	5.05297	5.23834	4.93622	4.44246	4.29923	4.94324	4.76355	4.93147	4.71677	4.80412	4.62681	4.47896	5.07861	4.32757	4.95397	4.88847	4.5543	3.65662	4.10164	4.73546	4.4954	4.41329	4.54015
OG0003676	Lthed_scf0120.1_g080770.1	Qgl_scf0120.1_g071680.1	AT5G49660.1	AT5G49660.1	II	0.781312	1.72367	1.54308	1.18471	1.3572	1.47082	1.22957	0.883313	0.718313	1.14821	1.20308	0.633343	1.07073	1.6036	2.11648	1.50159	1.6823	1.51365	0.904077	1.03613	1.04093	1.24901	1.12364	1.00795	1.22478	0.389343	1.47396	1.03631	1.12695	0.810566	1.64091	1.07821	1.46531	1.19038	0.789123	0.522592	0.912712	0.894702	1.40035	0.995947	0.523987	0.977502	1.14631	1.22079
OG0003678	Lthed_scf0080.1_g095810.1	Qgl_scf0070.1_g017150.1	NA	AT5G20700.1	V	8.83963	8.82264	9.47837	8.40788	9.04092	9.24475	8.58841	8.01585	8.19467	8.89263	8.5986	7.76697	7.80254	8.44072	8.87286	8.75686	9.51347	9.12557	7.97951	8.57806	8.49021	8.49775	8.64823	8.22811	9.22611	7.48785	8.39643	8.41504	8.56875	8.59791	8.07955	8.64379	8.90915	8.68513	8.04548	7.91739	7.96489	8.32342	8.79	7.84626	7.88921	8.29242	8.75243	8.59714
OG0003679	Lthed_scf0010.1_g020560.1	Qgl_scf0020.1_g019880.1	AT5G57830.1	AT5G57830.1	IV	1.05059	1.15434	0.599222	0.911999	0.926702	1.11734	1.08063	1.08423	0.961142	1.9588	1.73845	0.755371	0.93192	0.689982	0.598764	0.902657	0.631461	0.666657	1.33253	1.01401	0.911659	0.974752	1.1039	1.31692	1.0874	1.66447	1.00666	0.719335	1.3394	1.01606	0.827993	0.994306	1.02439	0.989367	1.67648	1.61977	1.51048	1.33071	1.49763	1.26191	0.819946	1.41534	0.912469	0.85167
OG0003680	Lthed_scf0010.1_g020890.1	Qgl_scf0020.1_g020200.1	AT4G30710.3	AT4G30710.3	V	3.30562	3.49624	3.41935	3.54024	2.96678	3.39519	3.6176	3.32678	3.09076	2.76917	3.1572	3.96583	3.41979	3.24007	2.9726	3.54199	3.08267	3.32179	3.89501	3.59376	3.42789	3.04938	3.13212	3.40453	3.15028	4.09935	3.26381	3.22454	3.38514	3.42996	3.61986	3.35914	3.44486	3.3479	3.2698	3.46241	3.34117	3.17116	3.27269	3.56076	3.41031	3.41952	3.26639	3.29004
OG0003683	Lthed_scf0010.1_g022490.1	Qgl_scf0020.1_g021840.1	AT5G57990.1	AT5G57990.1	II	5.58068	6.08083	6.28286	6.17832	6.37518	6.35931	6.3509	6.59166	6.70447	6.86802	6.79431	5.70992	5.59715	5.71951	6.36665	6.28277	6.65905	6.31618	6.44261	6.29229	6.86368	6.82146	7.32312	7.27356	6.93109	5.72776	5.454	6.43497	5.9858	6.42316	6.59334	6.76236	7.15842	6.68248	6.72922	6.42073	6.23876	6.19726	6.71128	5.97307	5.69455	6.1991	6.69846	6.86249
OG0003686	Lthed_scf0070.1_g073130.1	Qgl_scf0080.1_g067950.1	AT5G08450.3	AT5G08450.3	III	5.11308	4.88171	5.09592	5.04699	5.01431	4.92859	4.97548	5.07314	5.05119	5.03056	5.12308	5.08651	4.93747	5.01847	4.86404	5.08074	4.97907	5.08883	5.09089	5.13837	5.42982	5.30098	5.27396	5.26599	5.13728	5.18528	4.96845	5.0251	5.09836	5.0759	5.24712	5.03416	4.95801	5.26728	5.45938	5.36917	5.42079	5.31219	5.2785	5.19131	4.95207	5.13572	4.93055	4.9249
OG0003690	Lthed_scf0030.1_g149990.1	Qgl_scf0010.1_g011850.1	AT3G52110.2	AT3G52110.1	I	1.88452	1.69292	1.19872	2.1359	1.89621	1.58378	1.88838	0.793422	0.575651	0.0955822	0.0824325	3.39752	3.45446	2.16734	1.64783	1.00909	0.384007	1.29964	1.88101	1.88851	1.23728	0.289035	0.242767	0.436408	0.635156	3.45686	2.9552	1.88646	2.33628	2.46215	1.24192	1.46195	1.35618	0.617776	0.736553	0.119278	0.634525	0.707011	2.05432	2.83151	2.95429	1.59379	1.48973	1.44175
OG0003691	Lthed_scf0030.1_g143680.1	Qgl_scf0010.1_g028000.1	AT3G51950.4	AT3G51950.4	I	5.93898	6.35429	6.50465	6.03195	5.9928	6.21601	5.90096	5.79525	5.4447	5.92756	6.19893	5.49328	6.19106	5.93513	5.93736	6.42728	6.35892	6.43537	6.32292	5.98769	6.22699	6.00261	5.67672	6.15646	6.34228	5.77706	5.93667	6.62416	6.45737	6.42005	6.42817	6.29424	6.35857	5.75629	6.00903	6.1757	6.99497	7.09463	6.74934	6.27863	6.3906	6.68347	6.6036	6.36919
OG0003694	Lthed_scf0030.1_g131780.1	Qgl_scf0010.1_g044100.1	AT2G38720.1	AT2G38720.1	I	1.28588	1.11742	0.75152	1.13452	1.11781	1.14865	1.55506	1.40737	0.457997	0.185328	0.834784	3.07986	1.75039	1.81206	0.878976	0.930006	0.375511	1.12409	1.6361	1.50243	0.95196	0.357748	0.595245	0.226923	0.617739	2.77042	1.38004	1.20597	1.33428	1.25358	0.850838	0.996449	0.966565	0.445296	0.275033	0	0.258171	0.176098	1.06472	1.78177	1.56497	1.13015	0.65403	0.971905
OG0003695	Lthed_scf0030.1_g131320.1	Qgl_scf0010.1_g045070.1	AT3G12390.1	AT3G12390.1	III	8.264	8.4002	8.11634	8.53261	8.41061	8.27815	8.65507	8.87232	8.87505	8.74333	8.93728	9.04786	8.5656	8.4541	8.15083	8.09001	8.38905	8.20856	8.58894	8.51373	9.03571	8.9198	9.00559	9.11436	8.85048	9.17794	8.3759	8.80123	8.53173	8.44602	8.53974	8.58915	8.65277	8.87291	9.02897	9.0743	9.06888	9.10813	9.25799	9.30807	8.61158	8.32288	8.25294	8.36026
OG0003696	Lthed_scf0030.1_g127770.1	Qgl_scf0010.1_g049490.1	AT5G58220.1	AT5G58220.1	III	4.85753	4.53591	4.42904	4.47194	4.63535	4.6585	4.62215	4.5887	4.65301	4.88655	4.6153	4.55721	4.90367	4.89734	4.85489	4.68622	4.98675	4.93985	4.58384	4.67704	4.80397	4.883	4.84729	4.69467	4.59943	4.81895	4.78578	4.86428	4.96564	5.00666	4.81005	5.18782	5.09003	5.19812	5.0415	4.93551	5.25638	5.07243	4.9978	5.17391	5.31175	4.88432	4.92341	5.14848
OG0003698	Lthed_scf0030.1_g119700.1	Qgl_scf0010.1_g060050.1	AT3G60260.4	AT3G60260.4	I	4.58021	4.52939	4.32879	4.3302	4.18462	4.47057	4.19228	3.55465	3.35487	3.48008	3.5123	4.93834	5.27919	4.77031	4.62086	4.31697	3.93703	4.34832	4.20134	4.11785	3.78993	3.90789	3.60156	3.81478	3.80363	5.16331	5.00841	4.8135	4.96361	4.59551	4.81705	4.60348	4.46395	4.15053	3.76165	3.50317	3.72555	3.82612	4.00089	4.82457	5.33267	4.63447	4.13067	4.30819
OG0003699	Lthed_scf0030.1_g119350.1	Qgl_scf0010.1_g060630.1	AT1G02120.1	AT1G02120.1	IV	4.20457	4.1326	4.34049	3.83518	3.78847	3.99375	3.75799	3.77515	3.98417	4.21446	4.17571	3.80701	3.78347	3.89757	3.9108	4.02245	3.99124	4.23132	3.79988	3.73732	3.71472	4.05631	4.2244	4.43395	3.87092	3.79592	3.74256	3.40071	3.53171	3.65954	3.77377	3.71373	3.60413	3.72829	4.02135	4.35191	4.69317	4.28667	3.92468	3.46218	3.63655	3.51428	3.87399	3.71132
OG0003702	Lthed_scf0030.1_g112300.1	Qgl_scf0010.1_g068040.1	AT2G44980.3	AT2G44980.3	II	1.7853	1.53223	1.77522	1.51735	1.76632	1.71861	1.7172	1.81861	1.54953	1.52917	1.84406	1.97932	1.78621	1.64595	1.67554	1.86258	2.14926	1.85914	1.58511	1.5734	1.67353	1.58388	1.94534	1.64645	1.9076	1.76773	1.46963	1.57991	1.82555	1.84289	1.64132	1.73902	1.55101	1.82677	1.79348	2.07749	2.16303	2.05103	2.09054	1.92669	1.8152	1.51669	1.62006	1.71328
OG0003704	Lthed_scf0030.1_g109280.1	Qgl_scf0010.1_g071000.1	AT2G45050.1	AT2G45050.1	I	2.86573	3.94016	4.46137	4.01817	4.76501	4.19907	4.21525	4.24677	2.94553	2.85715	3.85392	5.16235	3.49955	2.2891	2.59016	2.36682	3.11959	3.67746	3.49384	3.35812	2.93484	2.76444	3.03375	1.76625	2.85759	4.79354	2.71156	3.04777	3.04674	3.71662	3.01901	3.30611	3.06055	2.94024	2.06637	1.14631	0.943079	1.31556	2.22093	3.19178	3.45699	3.14335	2.81512	4.05384
OG0003705	Lthed_scf0030.1_g104490.1	Qgl_scf0010.1_g077880.1	AT2G45130.1	AT2G45130.1	V	3.90023	3.15081	3.5445	3.28122	2.8789	3.28728	3.62487	4.71402	3.58725	2.58621	1.92636	1.92518	0.521326	1.80111	2.92638	3.29252	3.59543	3.06929	2.905	3.32317	4.13212	3.63806	2.35118	2.91337	3.77306	3.49245	2.53755	3.1029	2.53496	3.20124	3.22929	4.15375	3.0848	4.34192	2.97862	2.7485	3.23702	1.81255	2.43414	3.02898	3.41104	4.57519	4.70508	4.10969
OG0003707	Lthed_scf0030.1_g100060.1	Qgl_scf0010.1_g080630.1	AT2G45190.1	AT2G45190.1	I	4.84417	5.34868	5.5401	5.49478	5.41643	5.58575	6.23055	4.43405	2.5408	4.02512	5.23481	6.08999	3.83057	4.46388	4.13138	5.48899	4.833	5.33467	5.95028	5.51603	4.53747	3.29555	2.50777	1.80695	4.84806	4.78835	4.12859	4.4384	5.36793	6.17176	5.56971	5.22403	5.82069	3.81326	3.808	2.11971	1.62396	3.06907	4.21618	4.04439	4.76978	4.53796	4.81404	4.72337
OG0003709	Lthed_scf0030.1_g098510.1	Qgl_scf0010.1_g082340.1	AT5G04510.1	AT5G04510.1	I	4.04225	3.73926	3.38081	4.00946	3.58605	3.76546	3.73516	4.25236	3.79018	3.64002	3.77406	4.22625	4.6992	3.88562	3.73732	3.80611	3.80996	3.65016	4.03585	3.87631	4.05865	3.80145	4.14706	4.16284	3.82804	4.50469	4.31047	4.41017	4.5437	4.3524	4.47285	4.33452	4.16034	4.14477	4.05697	4.00383	4.37158	4.3809	4.61632	4.77464	4.64654	4.45242	4.23881	4.05766
OG0003711	Lthed_scf0030.1_g089990.1	Qgl_scf0010.1_g094970.1	AT5G04740.1	AT5G04740.1	V	5.65595	6.01645	5.92153	6.01987	6.09512	6.17273	5.84088	5.93068	6.00329	6.12709	5.54156	5.38618	5.37126	5.82985	5.77168	5.99565	6.398	5.87595	5.92519	5.83883	5.47717	6.02244	5.6715	5.66023	5.82652	5.62586	5.29045	5.58472	5.51971	5.60674	5.74427	5.93993	5.9959	6.03423	6.28092	6.16133	5.74945	5.77736	5.63894	5.90159	5.86837	5.91317	5.88915	5.93508
OG0003713	Lthed_scf0030.1_g084410.1	Qgl_scf0010.1_g101330.1	AT3G10640.1	AT3G10640.1	III	6.15408	6.0073	6.15219	5.85106	5.85567	5.96565	5.8123	5.51506	5.57232	5.59122	5.35088	5.96821	5.90661	6.24497	5.97775	5.69654	6.05407	6.17267	5.59189	5.60802	5.50108	5.55532	5.59759	5.97673	5.40692	5.76592	6.09528	5.60898	5.82672	5.69482	5.48348	5.92194	5.79907	5.83438	6.30969	6.37109	6.41585	6.33538	5.87775	5.85445	5.77234	5.57454	5.8801	5.8023
OG0003714	Lthed_scf0030.1_g081620.1	Qgl_scf0010.1_g103930.1	AT3G10670.1	AT3G10670.1	II	4.44539	4.49462	3.91693	3.99584	4.15318	4.0621	4.23076	4.4054	4.4152	4.25991	4.49723	4.87803	4.87776	4.74483	4.10797	4.05543	3.79816	4.36244	4.30755	4.41025	4.46421	4.31372	4.4554	4.27965	4.4319	5.00329	4.45174	4.95991	4.7962	4.69283	4.74063	4.67625	4.35352	4.80998	4.65012	4.56807	4.39647	4.4422	5.03299	5.52549	5.24366	4.84012	4.33994	4.46377
OG0003715	Lthed_scf0030.1_g080720.1	Qgl_scf0010.1_g105450.1	AT5G04885.2	AT5G04885.2	II	3.67058	3.86274	3.60152	3.99357	3.48354	3.4326	4.10913	4.84821	4.72104	4.19233	3.9622	4.38555	4.18706	3.69677	3.16696	3.44981	3.4454	3.21596	4.0847	4.10387	5.03693	4.90744	4.83337	4.78842	3.92304	4.83076	4.12822	4.32421	4.38787	3.88052	3.68488	3.48853	3.37146	4.48884	5.16909	4.93518	4.0958	4.23554	4.57831	4.66595	4.2981	3.92541	2.77461	3.06897
OG0003717	Lthed_scf0030.1_g078490.1	Qgl_scf0010.1_g107090.1	AT2G27100.1	AT2G27100.1	III	4.68288	4.58048	4.75481	4.6355	4.53715	4.60802	4.60178	4.45062	4.65215	4.6772	4.83505	4.88145	4.72945	4.93952	4.63026	4.67618	4.62845	4.6645	4.63864	4.59464	4.69863	4.60534	4.79421	4.86294	4.63248	4.55363	4.52425	4.69198	4.7667	4.81203	4.97693	4.73341	4.67248	4.74966	4.6747	4.93205	5.09859	4.87327	4.63685	4.61336	4.74969	4.66664	4.62781	4.66265
OG0003719	Lthed_scf0010.1_g085840.1	Qgl_scf0020.1_g082780.1	AT5G48630.1	AT5G48630.1	III	4.12522	3.61318	4.13803	4.12796	3.86427	4.17052	3.91966	4.66433	4.65907	5.06044	5.24982	4.07048	4.31553	4.40937	4.34139	4.0576	4.58047	4.48828	4.34391	4.60697	4.77462	4.98936	5.15445	4.96136	5.04396	4.52548	4.4473	4.44552	4.32943	4.32004	4.4923	4.23824	4.72357	4.8208	5.0258	5.19414	5.32948	5.13845	4.86548	4.67811	4.60626	4.69114	4.6474	4.89308
OG0003720	Lthed_scf0090.1_g097090.1	Qgl_scf0060.1_g011850.1	AT3G25290.2	AT3G25290.2	IV	7.12998	7.16777	7.15116	7.12609	6.92017	6.91759	6.94713	7.64405	7.9309	7.79376	7.06258	6.27525	6.99915	7.25141	7.42746	7.40863	7.03846	6.94737	7.12019	6.92853	7.62014	7.78227	7.47602	8.66793	7.35908	6.34435	7.32414	6.76866	6.92403	6.70327	7.12031	7.14641	7.14397	7.86997	8.39375	8.59126	8.31713	7.58615	6.57278	6.28299	6.6593	7.20604	7.03432	7.31089
OG0003721	Lthed_scf0100.1_g075380.1	Qgl_scf0100.1_g038910.1	AT3G07870.1	AT3G07870.1	IV	3.00656	3.48814	3.29842	3.24327	3.15203	3.52027	3.5963	3.10848	3.28642	3.49828	3.42842	3.26961	2.94694	2.91619	3.23884	3.47745	3.68674	3.58832	3.68121	3.55234	3.63453	3.65361	3.52124	3.99463	3.72019	3.26598	2.84335	3.34024	3.42786	3.5009	3.68223	3.54523	3.80755	3.66987	3.55695	3.36284	3.62465	3.11079	3.40614	3.30243	3.47134	3.36558	3.80436	3.48589
OG0003726	Lthed_scf0060.1_g048020.1	Qgl_scf0090.1_g072070.1	AT5G58350.1	AT5G58350.1	IV	3.2157	2.98478	3.80986	3.3117	3.24733	3.35423	2.88497	3.89644	3.90502	4.10274	3.95682	2.44601	2.61761	4.26734	4.43846	3.89469	3.89801	3.27269	3.19594	3.16707	4.19194	4.37563	4.99177	4.83219	4.34666	2.86356	3.48957	6.63169	5.8515	5.24622	4.23548	4.23618	4.3649	4.83715	5.25612	5.49382	6.46711	6.66589	7.03703	6.16172	5.05958	5.48229	5.78254	5.65553
OG0003728	Lthed_scf0060.1_g050840.1	Qgl_scf0090.1_g069800.1	AT5G07120.2	AT5G07120.2	IV	4.2327	3.97255	4.26904	4.24579	3.98029	4.27288	4.08656	4.79581	4.55528	4.56472	4.42345	4.39482	4.03751	4.11231	4.24985	4.31108	4.4936	4.4311	4.14364	4.08715	4.39698	4.56197	4.80195	5.07589	4.09687	4.09659	4.1432	3.95364	4.02008	3.95896	4.10737	3.98972	4.0343	3.96293	3.95998	4.79838	4.51521	4.0797	2.9915	3.89163	3.79469	3.72045	3.48799	3.83984
OG0003731	Lthed_scf0060.1_g072640.1	Qgl_scf0090.1_g045970.1	AT2G29760.1	AT2G29760.1	II	0.919497	1.15653	0.3358	0.605641	1.08845	0.730029	0.929911	0.629369	0.539597	0.289358	0.556331	1.31213	0.545663	0.78025	0.607783	0.540999	0.864313	0.700812	0.623991	0.869931	0.678925	0.627292	0.279921	0.343097	0.783942	1.26265	0.586597	1.20714	0.981909	1.1965	1.31807	1.10664	1.41158	1.03462	0.717013	0.505841	0.564524	0.45754	1.35204	1.17649	0.998651	1.11849	1.00991	0.958637
OG0003734	Lthed_scf0060.1_g052710.1	Qgl_scf0090.1_g067400.1	AT5G58930.1	AT5G58930.1	I	4.39918	4.40946	5.27884	4.18215	4.60842	4.63233	4.46336	3.75964	3.53693	3.59469	3.80791	4.43425	4.71672	4.07098	4.63586	4.34671	4.72668	4.64424	4.06649	4.07063	3.79636	3.36302	3.75326	3.10824	3.57138	3.98191	4.3535	4.41598	4.31416	4.37842	4.46664	4.35081	4.3746	3.72096	2.32225	2.154	3.2335	2.99117	3.92977	4.12968	4.71891	4.2006	4.31816	4.2287
OG0003737	Lthed_scf0060.1_g059270.1	Qgl_scf0090.1_g060370.1	AT2G29070.2	AT2G29070.2	III	2.23682	2.3754	1.79153	2.13247	1.74669	1.74341	2.05755	3.44773	3.29404	3.30625	3.15177	2.89994	2.30952	2.1915	2.34528	2.01893	1.54447	1.70315	2.23628	2.25497	2.95227	3.16833	2.5118	3.26097	2.88582	2.68045	2.55127	3.10798	2.70754	2.63644	2.70862	2.57166	2.4765	3.29899	3.52909	3.505	3.37185	3.68008	3.76291	3.35981	2.73611	2.62456	2.40758	2.56894
OG0003738	Lthed_scf0060.1_g061370.1	Qgl_scf0090.1_g058280.1	AT2G28900.1	AT2G28900.1	IV	7.40928	7.2475	6.38032	6.9659	7.22959	6.72372	7.9939	8.47744	9.20627	9.15374	9.33211	7.29978	7.82959	8.05505	7.47055	7.19342	7.31906	6.90024	7.96163	8.1848	8.95628	9.49687	9.35211	9.36388	9.09729	7.06973	8.04132	8.51933	8.29691	7.34184	7.96457	8.22503	8.22837	9.39329	9.83534	9.41457	9.32328	9.50514	8.85155	8.34289	7.92795	8.3229	7.67566	7.92529
OG0003741	Lthed_scf0060.1_g064050.1	Qgl_scf0090.1_g055670.1	AT5G59800.1	AT5G59800.1	I	2.24863	2.13501	3.06687	2.84607	2.26308	2.7611	3.25324	2.59998	2.63522	2.24544	2.07656	2.81519	3.05917	2.59168	2.72556	2.928	3.52262	3.28181	3.24764	2.89376	3.00028	2.72053	2.6128	1.8634	2.20949	2.97664	2.52833	2.18749	2.45179	2.70415	2.01877	2.77051	2.70943	2.25451	1.42991	1.33142	0.945594	1.35126	2.3478	2.251	2.3006	2.15156	2.09538	1.96447
OG0003743	Lthed_scf0060.1_g064060.1	Qgl_scf0090.1_g055660.1	AT3G55350.1	AT3G55350.1	I	2.3529	2.89687	2.60371	2.64146	1.92122	2.28343	2.62332	3.18254	2.63216	3.06613	2.78701	3.03534	2.81155	3.13717	2.41007	2.53708	2.29001	2.29686	2.89779	2.90226	2.81769	3.07902	2.82602	2.60119	3.11141	3.09652	2.87857	3.04259	3.02163	2.93413	2.91368	2.84039	3.02275	2.75019	2.70816	2.89788	2.82985	2.90619	3.27789	3.03724	3.04522	3.12786	2.91789	2.59719
OG0003745	Lthed_scf0060.1_g043260.1	Qgl_scf0090.1_g076170.1	AT2G28470.5	AT2G28470.3	I	4.46521	4.34289	4.40239	4.50425	4.78874	4.72661	5.73121	5.88484	5.87891	5.28227	4.53474	4.68461	5.37634	5.31932	4.75616	4.2691	3.92917	4.04405	5.06642	5.53168	5.58671	6.13876	5.08246	5.58809	4.51794	5.55588	5.50062	4.97293	5.55385	5.20139	5.22362	5.96687	6.2853	6.36263	5.86897	5.37381	5.00919	4.94374	5.0327	5.34795	6.08395	5.46146	5.06375	4.99014
OG0003747	Lthed_scf0060.1_g041740.1	Qgl_scf0090.1_g076970.1	AT2G28310.3	AT2G28310.3	I	4.08199	3.81165	3.99898	3.71186	3.39269	3.84035	4.22425	4.24658	4.04583	4.3339	4.18249	4.5762	3.82271	3.87363	3.312	3.7616	3.66623	3.72196	4.15865	4.22047	3.99755	4.05296	4.07335	4.07755	3.71346	4.4851	4.11173	3.79169	4.0959	3.97912	3.82317	4.08804	3.75899	3.99765	3.8477	3.71441	3.70954	3.53251	4.07248	3.89214	4.32538	3.88771	3.88544	3.55996
OG0003748	Lthed_scf0060.1_g028100.1	Qgl_scf0090.1_g088410.1	AT4G05160.1	AT4G05160.1	IV	3.43777	3.24845	3.26781	3.45701	3.12222	3.04054	3.26806	3.81993	3.75307	4.31431	3.78466	3.79203	3.85983	3.51609	2.96371	3.00531	3.14051	3.28167	3.46372	3.53699	3.64513	3.79024	4.49707	4.6409	3.98603	3.96622	3.52755	4.10587	3.89265	4.42643	3.90734	3.88284	3.87723	3.42185	4.0435	3.57891	3.66024	3.23631	4.27968	4.07458	4.55481	4.34504	4.07571	4.36344
OG0003750	Lthed_scf0060.1_g018780.1	Qgl_scf0090.1_g103720.1	AT2G26980.4	AT2G26980.3	III	5.74052	5.61094	5.93679	5.63087	6.05966	5.77223	5.67624	5.5551	5.26299	4.97865	5.16959	5.03363	5.58774	5.5871	5.37229	5.84983	5.80956	5.69468	5.64662	5.68793	5.36965	5.32052	5.6396	5.6257	5.16483	4.98096	5.38448	5.27701	5.24096	5.17206	5.19603	5.11245	4.99069	4.73028	5.44155	5.21368	5.12135	5.11836	5.06869	4.61986	5.03924	5.12121	5.24101	5.21104
OG0003753	Lthed_scf0060.1_g036020.1	Qgl_scf0090.1_g080970.1	AT1G08465.1	AT1G08465.1	I	6.48085	6.4715	5.58233	6.87375	6.49467	6.15287	6.54608	6.73255	6.99541	6.45538	6.47755	6.95392	6.02711	6.18225	5.70049	6.49087	5.81055	6.48978	7.43417	7.27087	7.03927	6.96137	6.50534	7.11213	6.72431	6.96872	6.16936	6.1509	6.7246	6.75974	6.67053	6.41628	6.67552	6.40498	6.88922	6.29077	6.08151	6.45879	6.6197	6.27909	6.03214	6.5	5.71966	6.01109
OG0003756	Lthed_scf0060.1_g004960.1	Qgl_scf0090.1_g097150.1	AT2G27260.1	AT2G27260.1	I	5.24573	5.7051	5.92184	5.29556	5.60695	5.91003	5.66977	5.27722	5.49605	5.59726	5.61966	5.55869	5.08896	5.47847	5.62991	5.57014	5.53524	5.54554	5.25101	5.11172	5.29148	5.36553	5.41536	4.89536	4.94435	4.84732	4.87481	5.24108	5.15451	5.1434	5.43371	5.33303	5.47618	5.63624	6.14428	6.40264	5.68117	5.64075	4.3928	4.83083	4.99041	5.17087	5.10384	5.59017
OG0003757	Lthed_scf0060.1_g005000.1	Qgl_scf0090.1_g097110.1	AT1G75660.1	AT1G75660.1	V	0.12859	0.308588	0	0.402713	0.027876	0.24286	0.147221	0.183906	0.101032	0.0667237	0.290413	0.568827	0.671863	0.299843	0.392376	0.35336	0.505215	0.446302	0.433132	0.379008	0.397324	0.301555	0.0941409	0.302329	0.128476	1.04112	0.506781	1.05359	0.929032	0.492714	0.497974	0.396781	0.366262	0.446331	0.379423	0.431388	0.403125	0.515031	0.982008	1.03044	1.12631	0.492973	0.679826	0.461442
OG0003762	Lthed_scf0060.1_g029440.1	Qgl_scf0090.1_g087480.1	AT2G26770.3	AT2G26770.3	III	5.35584	5.01448	4.77525	5.25068	5.12193	4.98021	5.05252	5.02352	4.9805	5.20824	5.10382	4.60817	5.22597	5.47494	5.45238	5.13734	4.82196	5.01164	5.02557	5.05785	5.01146	5.22167	5.17701	5.25226	4.82757	4.43589	5.34767	5.13438	5.14121	5.04878	5.15605	5.20841	4.98895	5.01602	5.18868	5.32659	5.52407	5.37797	5.24108	4.95234	5.08079	5.01494	5.1204	5.00576
OG0003763	Lthed_scf0050.1_g121810.1	Qgl_scf0040.1_g151140.1	AT1G27040.3	AT1G59740.1	I	1.0375	1.55416	0.610295	1.23666	1.02235	1.07797	1.59764	0.730844	0	0	0.106291	2.70412	0.483573	0.6466	0.22092	0.907309	0.879938	1.67495	1.96453	1.57554	0.151891	0.172339	0	0.0256263	0.206786	3.11913	0.718773	1.32651	1.45167	2.29066	1.32325	1.27022	1.53652	0.0395636	0	0	0.0250288	0.0865587	0.855841	1.2718	0.802772	1.27484	1.08592	1.05222
OG0003765	Lthed_scf0060.1_g030220.1	Qgl_scf0090.1_g086800.1	AT5G07990.1	AT5G07990.1	V	3.21636	2.84191	3.9389	3.0781	3.42872	3.97662	3.00057	2.03025	0.961876	0.697389	1.80845	1.5722	2.91088	4.75604	3.19482	4.5378	5.21571	4.87991	3.98847	2.7094	2.8388	1.04744	0.398515	0.107139	1.05304	2.475	2.86662	3.98851	3.84673	3.86866	1.93779	2.78616	3.22871	2.20839	1.38349	0.835556	1.93063	2.73614	3.4455	3.99409	2.89261	5.5195	4.55469	3.47301
OG0003766	Lthed_scf0060.1_g031080.1	Qgl_scf0090.1_g086280.1	AT5G12330.4	AT5G12330.4	I	6.21031	6.27201	6.11364	6.02836	6.18545	5.86507	5.84924	6.07593	5.39044	5.58465	5.94071	4.9498	6.17535	6.13926	6.3601	6.31855	5.6365	5.79973	6.18512	5.71841	6.56008	6.05828	5.71005	5.38894	6.39314	5.26341	6.17371	7.18755	6.67679	5.92111	6.34569	5.67752	5.77165	6.28367	6.27072	6.10116	6.44932	7.13509	7.27847	6.88925	6.3247	6.89549	6.0495	6.64435
OG0003767	Lthed_scf0060.1_g031310.1	Qgl_scf0090.1_g086010.1	AT4G03250.1	AT4G03250.1	III	3.34167	3.2683	3.57977	3.52923	2.89044	3.33039	3.46273	3.53565	3.77886	3.67424	3.76583	3.4199	3.12278	3.43078	3.13238	3.51219	3.13698	3.34579	3.37339	3.45436	3.66145	3.80403	3.76707	3.86225	3.42818	3.43412	3.24966	3.19504	3.16859	3.31076	3.30264	3.47466	3.50115	3.72953	4.06418	4.33327	4.83568	4.11296	4.03879	3.28783	3.06183	3.44386	3.72906	3.32951
OG0003768	Lthed_scf0060.1_g031220.1	Qgl_scf0090.1_g086160.1	AT5G19420.1	AT5G19420.1	IV	3.82669	3.99961	4.05117	3.68159	3.76815	3.7824	3.86065	3.98469	4.0782	4.40806	4.22029	3.59251	3.8529	4.0169	3.96507	4.13996	4.07187	4.02711	3.96701	3.66933	4.14398	4.28079	4.5216	4.71571	4.14912	3.58728	3.7089	3.80256	3.93607	3.7465	4.08515	3.8435	3.88316	3.78426	4.71811	4.88536	4.8928	4.81843	4.483	3.80893	3.76783	3.91545	4.03113	3.85415
OG0003774	Lthed_scf0060.1_g128950.1	Qgl_scf0090.1_g003240.1	AT5G36890.1	AT5G36890.1	III	3.88788	3.68247	3.78282	3.98666	3.69319	3.72649	3.78332	3.86196	4.1946	4.3661	4.05824	4.19937	3.92369	4.11888	4.32172	4.19376	4.4349	4.08277	4.09694	4.38063	4.38624	4.74681	4.85062	4.51232	4.65719	4.38088	4.1076	4.28984	4.43874	4.54143	4.54467	4.64818	4.7129	4.64596	4.74856	4.5691	4.0429	4.11653	4.09478	4.60886	4.29595	4.37107	4.77075	4.77585
OG0003775	Lthed_scf0060.1_g034110.1	Qgl_scf0090.1_g083550.1	AT5G60900.1	AT5G60900.1	V	0.841973	1.66681	1.69239	1.72487	0.79034	1.77121	0.614329	0.104486	0.247267	0.279129	0.33489	0.253167	0.495283	0.318492	0.928098	0.94262	1.11777	0.753917	0.467744	0.527543	0.247008	0.0979218	0.272284	0.0467275	0.435428	0.571747	0.479764	1.01266	0.476298	0.84925	0.600455	0.566276	0.628096	0.749815	0.534582	0.738795	0.623788	1.1	0.962285	0.48175	0.877567	0.992453	1.24562	0.73866
OG0003776	Lthed_scf0060.1_g001660.1	Qgl_scf0090.1_g099690.1	AT5G13020.1	AT5G13020.1	IV	4.48443	4.70464	4.58524	5.10348	4.64185	4.56967	4.54866	5.08074	5.48981	5.71735	5.67568	4.55578	4.12833	4.351	4.60473	4.82843	4.99801	4.47549	5.02171	5.03194	5.40899	5.79738	5.87603	5.70352	5.62528	4.58012	4.32171	4.67463	4.73171	4.7176	5.09569	5.05901	4.98658	5.22951	5.25128	5.54185	5.93245	5.59075	5.27407	4.45657	4.44327	4.96655	5.10333	5.25835
OG0003778	Lthed_scf0060.1_g019690.1	Qgl_scf0090.1_g102670.1	AT1G55260.1	AT1G55260.2	I	6.53646	6.12681	6.28926	7.07699	6.74059	6.74396	6.51808	6.59949	5.8243	5.28086	4.76453	6.2746	5.9309	5.99339	6.64903	6.01098	6.21306	6.3305	6.00046	6.07368	5.79098	5.56631	4.67865	5.01111	4.81736	6.07789	6.20824	6.73212	6.78715	6.10024	6.74452	6.41951	6.71534	6.49877	6.09761	5.76235	6.45273	6.25352	6.60664	7.06935	6.3929	6.56744	6.20522	6.8861
OG0003783	Lthed_scf0080.1_g038270.1	Qgl_scf0070.1_g071590.1	AT5G44750.1	AT5G44750.1	IV	1.10586	1.19879	1.09369	1.33819	0.7262	0.93907	1.33179	1.17077	1.43696	1.25031	1.33392	1.71365	0.689523	1.19341	0.740438	1.19874	1.1077	0.916425	1.08316	1.15228	1.2983	1.15964	1.73014	1.451	1.49618	1.16062	0.53663	0.9575	0.943893	1.27325	1.02652	0.939009	1.21036	1.29525	1.44802	1.60307	1.85997	1.62088	1.22337	1.10919	0.946716	0.827548	0.995974	1.03025
OG0003786	Lthed_scf0080.1_g074790.1	Qgl_scf0070.1_g038090.1	AT4G33500.1	AT4G33500.1	II	1.57957	1.10681	1.88606	2.23058	1.77698	1.41486	1.59313	2.00442	1.89633	2.05267	2.04039	1.39698	1.88638	1.90012	1.81827	1.69849	2.0373	2.04105	1.67746	1.73615	1.63694	1.7923	2.09417	1.89997	2.13239	1.80019	1.73677	2.35825	2.09327	2.05676	1.94108	2.10019	2.02412	1.67861	1.3231	0.978872	1.16697	1.52029	2.1104	1.90099	2.24943	2.26606	2.33878	2.00673
OG0003788	Lthed_scf0010.1_g011690.1	Qgl_scf0020.1_g012220.1	AT4G25980.1	AT4G25980.1	I	2.73925	2.92324	3.09248	2.97022	3.36879	3.1739	2.2206	3.05071	2.56825	2.4959	1.29702	2.48678	2.94222	2.62984	3.4768	3.15784	2.84692	3.51321	3.02101	3.30724	2.44535	2.37047	2.25968	2.382	2.75328	2.71665	2.5374	3.39144	4.14951	4.51635	3.77841	4.45112	5.05472	2.96818	3.23792	2.78521	2.21473	2.26501	0.797206	2.33056	2.58327	4.09656	4.2888	4.40018
OG0003794	Lthed_scf0020.1_g161460.1	Qgl_scf0030.1_g019930.1	AT1G61667.1	AT1G61667.1	V	6.15036	6.19279	6.08911	5.99482	6.15147	5.99476	5.88588	6.04351	6.27032	6.21473	6.1005	5.46985	5.9619	6.21058	6.18261	6.05926	5.79326	5.98291	5.88787	5.96985	6.05133	6.09642	6.24627	6.63535	6.22105	5.43926	6.072	6.1072	6.37591	6.28576	6.2366	6.32488	6.14437	6.74851	7.20192	7.12851	7.50721	7.49768	6.93299	5.87345	6.06493	6.48772	6.53205	6.50932
OG0003797	Lthed_scf0080.1_g019960.1	Qgl_scf0070.1_g092760.1	AT2G21540.6	AT2G21540.6	I	0.0873119	0	0	0.153769	0	0	0.411545	0.257432	0.0572773	0.212272	0.267615	0.285032	0.568203	0.277929	0.0301579	0.129819	0.0730271	0.0485877	0	0.0918569	0.0620685	0.0366876	0.0716076	0.0436927	0.0762095	0.670428	0.242259	0.249105	0.0791361	0.162575	0.0302057	0.129768	0.0358778	0.0684034	0	0	0.0656866	0	0.0921704	0.135208	0.19662	0.120583	0.0173035	0.138627
OG0003801	Lthed_scf0080.1_g009940.1	Qgl_scf0070.1_g105210.1	AT5G47900.8	AT5G47900.8	I	2.98128	3.0546	3.23808	2.98267	2.82491	2.93369	3.39099	3.27108	2.7803	2.57684	3.2178	3.43178	3.87075	3.23001	2.93421	3.12174	2.99519	3.28755	3.43454	3.23411	3.07492	3.2498	2.93638	2.63043	3.16125	3.51165	3.5061	3.62954	3.98305	3.84037	3.61939	3.71212	3.61353	3.87842	3.88202	3.7308	4.34399	4.33828	4.21165	3.71155	4.01801	4.03277	3.52565	3.4191
OG0003803	Lthed_scf0040.1_g115140.1	Qgl_scf0050.1_g026650.1	AT1G50910.1	AT1G50910.1	IV	1.88923	1.91642	0.968388	2.10371	1.83545	2.00313	2.43309	2.67508	2.60986	2.56655	2.70057	3.38462	2.39515	1.83494	1.57644	2.11945	1.85208	1.51986	2.23628	2.30101	3.14449	3.03807	2.67657	3.12041	2.86284	3.68638	2.37829	3.52587	3.20789	3.10977	2.81584	2.41829	2.45449	3.19983	2.9429	3.08342	3.08604	2.81281	3.64773	3.56204	3.1372	3.3081	2.76738	2.42561
OG0003804	Lthed_scf0080.1_g001860.1	Qgl_scf0070.1_g115950.1	AT2G33700.1	AT2G33700.1	V	6.32112	6.55728	6.90735	6.63701	6.64295	6.74018	6.35546	6.66497	6.96645	7.11509	7.05133	6.06405	5.8152	5.93523	6.12372	6.56581	6.83636	6.54205	6.57506	6.57323	6.38671	6.99925	7.75647	7.26185	7.09522	6.29681	6.42683	6.74132	6.6792	6.80919	6.65399	6.70704	6.63676	6.59533	6.5366	6.83443	7.60513	7.27261	7.12435	6.63285	6.77811	6.75657	6.82692	7.11569
OG0003807	Lthed_scf0050.1_g041440.1	Qgl_scf0040.1_g048990.1	AT5G64680.2	AT5G64680.2	III	3.67897	3.93104	4.42959	4.13003	4.39561	3.87161	4.47535	4.06051	4.48827	4.43437	4.43067	4.77083	4.12111	4.21717	4.15712	3.81948	4.08397	3.83147	4.1823	4.24668	4.01866	4.22906	4.62118	3.94763	4.50045	4.51608	3.73516	3.69403	3.75162	3.73693	3.97645	4.02103	4.16493	3.95359	3.40642	3.48586	3.79895	3.95128	4.1765	4.14038	4.06478	3.78018	3.96727	3.76759
OG0003816	Lthed_scf0120.1_g009170.1	Qgl_scf0120.1_g007720.1	AT4G17900.1	AT4G17900.1	V	6.39808	7.45302	8.20426	8.03674	8.21468	7.64422	5.42385	5.45123	6.33184	6.1695	6.21261	5.84107	5.49462	7.15103	8.31307	7.70759	7.04904	6.55677	5.23164	5.92011	5.151	5.54844	6.33852	6.08846	6.06325	5.92584	5.46395	6.35482	5.78375	6.32196	5.83035	6.03115	5.9659	5.20584	5.79811	6.12398	7.12277	7.01467	6.20738	5.54043	5.85494	6.11027	7.16305	6.44525
OG0003817	Lthed_scf0050.1_g064470.1	Qgl_scf0040.1_g070260.1	AT5G01180.3	AT2G02040.1	V	5.41994	5.6329	5.19868	5.66567	5.57214	5.28427	5.50297	5.54395	5.67057	5.69098	5.75568	5.05376	5.3018	5.73299	5.67058	5.74848	5.20351	5.42533	5.63462	5.73715	5.72373	5.77655	5.75586	6.27561	5.32328	5.13399	5.66901	5.64428	5.88074	5.77191	5.92511	5.68325	5.66042	5.6583	5.61225	5.79611	6.29235	5.85628	5.55434	5.42073	5.65157	5.7422	5.72348	5.77097
OG0003818	Lthed_scf0020.1_g138450.1	Qgl_scf0030.1_g041200.1	AT1G28560.3	AT1G28560.3	IV	2.49411	2.0673	3.06999	2.63171	3.04637	2.80987	2.86337	3.25531	3.73658	4.66662	4.16396	2.76379	1.96536	2.2402	2.68426	2.82581	3.40576	2.91176	2.67863	2.97914	3.67202	4.08172	4.8381	4.55029	3.75655	2.914	2.32829	2.83858	2.66016	2.76517	2.88999	2.81394	2.98944	3.50516	4.19531	4.83468	5.28885	5.00845	4.26655	3.08457	2.42936	2.6574	2.95762	3.15382
OG0003820	Lthed_scf0010.1_g083740.1	Qgl_scf0020.1_g080750.1	AT3G53260.1	AT3G53260.1	I	2.653	3.37579	2.23925	2.24493	2.93462	3.23055	0.715275	1.57607	1.61635	2.1131	1.94494	1.35875	2.5965	4.32308	3.40161	3.0069	2.61417	3.38287	2.2477	2.14943	1.42573	1.73576	1.56439	1.30114	2.5474	2.40567	2.85612	2.25988	1.75194	2.14781	1.41312	1.31486	1.20252	1.25863	2.56209	1.92605	2.05263	1.57687	1.47149	1.56239	1.15846	3.70474	3.10763	1.88285
OG0003824	Lthed_scf0050.1_g069830.1	Qgl_scf0040.1_g075970.1	AT1G68020.3	AT1G68020.3	V	4.62934	5.46246	6.50757	6.19131	6.13826	5.80208	4.80863	6.06838	5.99597	6.88871	6.53311	4.5566	5.06015	5.34275	5.86746	5.50823	6.16292	5.77244	4.97263	5.08728	5.60132	6.5085	7.59525	7.42826	5.92576	5.03341	4.93376	5.70206	5.06495	6.397	4.99045	5.61977	5.83986	5.31832	7.4483	7.75256	7.3988	7.35343	6.19603	5.60877	5.19249	5.26245	5.7339	6.20697
OG0003830	Lthed_scf0090.1_g068790.1	Qgl_scf0060.1_g043550.1	AT1G77720.1	AT1G77720.1	IV	2.16282	2.13068	2.00958	2.76074	2.10866	2.07416	2.75166	2.8047	3.0643	2.91696	3.2056	3.58977	2.88683	2.17632	2.06234	2.13367	1.47282	1.91879	2.98968	2.81162	3.39492	3.26347	3.27998	3.06704	3.01842	3.446	2.64299	2.54339	2.8502	2.57223	2.29478	2.48125	2.35244	2.91589	3.08545	2.98405	2.96042	3.27537	3.49652	3.34799	2.84488	2.47477	2.07457	2.21539
OG0003833	Lthed_scf0030.1_g154380.1	Qgl_scf0010.1_g007980.1	AT3G59550.1	AT3G59550.1	I	1.05234	0.222807	0.770905	1.05099	0.983756	0.608527	1.13471	0.528306	0.329719	0.10002	0	1.89212	1.07135	0.563061	0.474684	0.593624	0.069724	0.584897	0.900425	0.725862	0.344419	0.124097	0.0817947	0.0497516	0.346386	1.39112	0.696976	0.697789	0.808498	0.80076	0.498781	0.65088	0.291068	0.184716	0	0	0	0	0.66172	1.29459	1.30629	0.550945	0.365981	0.403491
OG0003836	Lthed_scf0090.1_g023000.1	Qgl_scf0060.1_g090730.1	AT5G25500.1	AT5G25500.1	II	0.8571	0.888305	1.42057	0.784118	0.513052	1.47032	1.24473	1.21863	0.992274	0.773553	1.68451	1.90834	1.05813	0.926493	0.652353	1.35884	1.24922	1.01429	0.967626	1.23056	1.2052	1.3892	1.03392	1.04384	1.73069	2.12349	1.28394	2.38142	1.69619	1.56232	1.55916	1.39948	1.6982	2.18392	2.05761	1.76486	1.52018	2.15214	2.53449	2.32473	1.96315	2.11757	1.50416	1.6005
OG0003842	Lthed_scf0100.1_g085410.1	Qgl_scf0100.1_g018670.1	AT5G66930.2	AT5G66930.2	II	5.02606	4.80302	5.05717	5.32185	5.3853	5.00549	5.16871	4.76569	5.16681	5.39872	5.50849	4.84755	4.45338	5.56623	5.53715	5.09944	5.10644	4.87369	4.9889	5.25626	5.08743	5.41248	6.03835	5.07983	4.96129	4.52028	4.8084	5.15577	5.35162	5.1073	5.69076	5.5323	5.70055	5.34143	4.46543	4.57701	5.48653	4.6491	5.44458	4.71807	5.05486	5.47755	6.02816	6.04968
OG0003844	Lthed_scf0100.1_g086450.1	Qgl_scf0100.1_g018040.1	AT2G23460.1	AT2G23460.1	III	4.67626	4.82518	4.76812	4.88227	4.61419	4.57703	4.49439	4.64497	4.38604	4.62516	4.69836	4.43037	4.4299	4.77668	4.80664	4.97877	4.81129	4.85355	4.82801	4.75582	4.90361	4.87647	4.8618	5.16269	4.72776	4.19983	4.52594	4.70128	4.86011	4.96367	4.82349	4.63507	4.80445	4.67235	4.84582	4.83866	5.01229	5.01576	5.03516	4.78304	4.64128	4.752	4.88396	4.76277
OG0003845	Lthed_scf0100.1_g087100.1	Qgl_scf0100.1_g017490.1	AT5G66600.9	AT5G66600.9	I	3.65579	3.67994	3.50355	3.31646	3.73437	3.59859	3.75555	3.03092	2.38092	2.25956	2.67833	3.51652	3.50196	3.36114	3.69564	3.70272	3.43626	3.4006	3.44591	3.3706	2.98914	2.29325	1.70191	1.24941	2.62024	3.48621	3.26548	3.49115	3.69531	3.65487	3.63918	3.78672	3.51251	2.85152	1.87397	1.59941	1.69131	1.92579	2.83143	3.11486	3.51886	3.61665	4.10613	4.00501
OG0003846	Lthed_scf0100.1_g088710.1	Qgl_scf0100.1_g015640.1	AT4G36760.1	AT4G36760.1	III	5.57928	5.44916	5.14485	5.66411	5.27376	5.23885	5.61452	5.47481	5.41026	5.2328	5.24647	5.77423	5.84142	5.7983	5.67553	5.47599	5.31196	5.29113	5.67058	5.75328	5.38651	5.5701	5.01136	5.0812	5.45539	6.18617	5.81624	5.95707	5.9733	5.93102	5.86565	5.98358	5.98286	5.97531	5.95589	5.76047	5.72392	5.57244	5.52479	6.12262	6.18918	5.86994	5.83719	5.67777
OG0003848	Lthed_scf0100.1_g090110.1	Qgl_scf0100.1_g014810.1	AT3G50670.1	AT3G50670.1	III	5.97776	5.98407	5.56011	6.32085	5.95627	5.76481	6.34322	6.46029	6.61353	7.01105	6.71223	6.65025	5.90495	6.18407	5.75671	5.87494	5.8359	5.66961	6.0724	6.19334	6.56861	6.78831	7.13985	6.49159	6.75091	6.47882	6.13511	6.23528	6.34812	6.18315	6.53394	6.44542	6.13484	6.5001	6.29303	6.26887	6.26198	5.84041	5.67586	6.63252	6.33871	5.95176	6.08142	6.53707
OG0003851	Lthed_scf0040.1_g033730.1	Qgl_scf0050.1_g104080.1	AT4G00720.1	AT4G00720.1	I	4.32281	4.59573	4.46924	4.49506	4.36888	4.57627	4.553	3.92255	3.85443	3.84771	3.89637	4.4008	4.59515	4.40561	4.17171	4.46278	4.62261	4.5319	4.56537	4.5211	3.75826	3.75086	3.79114	3.46719	3.65372	4.40478	4.46376	4.53191	4.82253	5.01483	4.68261	4.71841	4.57916	4.30095	4.57683	4.72108	4.70805	4.52193	4.39529	4.28929	4.96233	4.60893	4.90395	4.48723
OG0003852	Lthed_scf0040.1_g034960.1	Qgl_scf0050.1_g102750.1	AT2G45790.1	AT2G45790.1	V	6.40903	5.50208	5.0504	5.67704	5.06972	5.04449	5.45598	5.60903	4.71607	4.68296	4.69074	5.39148	6.81887	6.40692	6.17868	5.59263	5.09309	5.27718	5.95319	5.68699	5.33646	5.33784	4.60501	4.58597	4.90935	5.83488	7.0613	6.23534	5.96422	5.89714	5.67829	5.69713	5.48951	5.40696	5.22683	5.00922	4.79172	5.19163	5.69062	6.20227	6.59922	6.09041	5.83033	5.79438
OG0003853	Lthed_scf0040.1_g035240.1	Qgl_scf0050.1_g102650.1	AT4G00660.2	AT4G00660.2	I	6.27238	6.27394	5.94675	6.00284	6.17703	6.00655	6.26032	6.17887	6.06734	5.90965	5.97481	6.39613	6.5394	6.41412	6.35961	6.37366	6.09268	5.9927	6.42247	6.35404	6.427	6.06339	6.12285	6.52778	6.12762	6.5765	6.39555	6.42138	6.37324	6.24489	6.61074	6.37856	6.32341	6.0668	6.33119	6.18043	6.17881	6.3141	6.4874	6.3827	6.49122	6.32366	6.53335	6.1652
OG0003854	Lthed_scf0040.1_g037470.1	Qgl_scf0050.1_g099880.1	AT3G61415.1	AT3G61415.1	II	2.23908	2.14545	2.31936	3.10154	2.17651	2.43515	2.29459	3.29525	3.74022	2.92874	3.11207	2.90201	2.55647	2.20069	2.52172	2.74516	3.02633	2.47127	2.53365	2.71077	2.88449	2.89327	3.52661	3.18431	3.1903	2.65012	2.40476	2.67778	2.58995	2.32151	2.85573	2.67392	2.38799	3.26549	3.15517	3.19428	3.32889	3.16113	3.42442	2.7697	2.50184	2.96617	3.02017	2.94878
OG0003855	Lthed_scf0030.1_g070680.1	Qgl_scf0010.1_g116890.1	AT4G01290.2	AT4G01290.1	IV	5.15679	5.52052	5.60783	5.2388	5.36845	5.44859	5.56459	5.92358	5.87354	6.13033	5.84484	5.42534	5.16774	5.3696	5.36086	5.4181	5.71908	5.33155	5.55775	5.32276	5.94158	6.01407	6.08617	6.51918	5.79875	5.40694	5.1593	5.58155	5.44948	5.44489	5.79255	5.61417	5.76256	5.87652	6.46073	6.54365	6.42708	6.18487	6.04199	5.80041	5.32846	5.6069	5.6067	5.77005
OG0003856	Lthed_scf0030.1_g069750.1	Qgl_scf0010.1_g117550.1	AT5G12370.2	AT5G12370.2	I	4.47588	4.52487	4.38777	4.48326	4.57251	4.2169	4.3937	4.32365	4.31289	4.2768	4.11758	4.50775	4.39558	4.50831	4.51341	4.50255	4.53999	4.51694	4.33077	4.47338	4.30759	4.22092	4.43813	4.41589	4.17648	4.38209	4.25347	4.51174	4.53588	4.54646	4.62626	4.51091	4.52651	4.49019	4.63367	4.78816	4.81929	4.58469	4.45747	4.46536	4.53947	4.45187	4.50883	4.48887
OG0003858	Lthed_scf0030.1_g061450.1	Qgl_scf0010.1_g127980.1	AT2G46225.1	AT2G46225.1	I	4.95978	5.41785	4.81482	5.04547	4.85163	4.60674	5.19229	5.28217	4.83028	4.79341	4.83654	5.21198	5.06273	5.19882	4.96959	5.01622	4.75313	5.1302	5.22255	5.16469	5.24374	5.02342	4.96999	4.99543	4.6505	5.26464	5.06218	5.12433	5.22302	5.03047	5.09258	5.16974	5.05871	5.10846	5.26856	4.87531	4.95488	4.8351	5.48003	5.39288	5.29446	5.4824	5.15724	5.06731
OG0003859	Lthed_scf0030.1_g062560.1	Qgl_scf0010.1_g126580.1	AT4G01200.1	AT4G01200.1	I	1.92768	2.27954	2.75147	1.99336	1.99068	3.10264	1.63509	0.465905	1.04449	0.299439	0.581325	1.4088	1.44038	1.18363	2.24913	2.56681	2.44856	2.32311	1.43324	1.22852	0.957207	0.379112	0.881757	0.837761	0.780147	2.34318	1.09061	0.686166	1.02652	1.1209	1.10324	1.3179	0.748115	0.676999	0.529088	0.99011	0.511685	0.90314	0.116923	0.616623	0.674751	0.622313	0.533114	0.741906
OG0003860	Lthed_scf0030.1_g058850.1	Qgl_scf0010.1_g130050.1	AT3G61600.2	AT3G61600.2	IV	6.40918	6.10641	6.32324	6.29109	6.30356	6.3446	6.36492	6.58512	6.97422	7.2698	6.89526	6.83024	6.51072	6.23867	6.3651	6.50318	6.62134	6.56013	6.55101	6.61795	7.00987	7.35628	7.58514	7.69228	6.99083	6.97873	6.46852	6.50403	6.45824	6.3461	6.50274	6.39207	6.46372	6.85293	7.4548	7.86811	8.00034	7.56936	6.81805	6.73209	6.30177	6.40168	6.19434	6.51754
OG0003861	Lthed_scf0030.1_g059810.1	Qgl_scf0010.1_g129150.1	AT3G61650.1	AT3G61650.1	I	4.70051	4.63378	4.52021	4.95452	4.71963	4.10901	4.55208	4.47795	4.14921	4.29234	4.49278	5.10278	4.91191	5.05867	4.63691	4.64395	4.29139	4.49495	5.21439	4.88188	4.73436	4.65615	4.4391	4.0994	4.84689	5.17495	4.88136	4.95338	4.96319	4.89395	5.04793	5.01758	5.00918	4.69116	4.53149	3.94365	3.00834	3.62052	4.72038	5.20785	5.30369	5.02603	4.96064	4.70505
OG0003862	Lthed_scf0030.1_g067110.1	Qgl_scf0010.1_g120560.1	AT2G46370.4	AT2G46370.2	IV	5.25012	5.41055	5.56	5.21446	5.16729	5.35124	4.75896	5.44747	5.99089	6.58969	5.80339	4.59144	5.61831	5.39453	5.56046	5.68715	5.8807	5.5884	4.98342	5.08172	5.62037	6.1262	6.33725	6.94897	5.85732	4.78714	5.67728	5.50213	5.53538	5.51164	5.39269	5.12989	5.22541	5.20281	5.72521	6.07897	6.42882	6.27013	5.74914	5.09312	5.61172	5.73244	5.67148	5.66425
OG0003863	Lthed_scf0030.1_g056510.1	Qgl_scf0010.1_g132840.1	AT3G61740.2	AT3G61740.2	II	3.14988	2.81212	2.59388	2.67793	2.98228	2.93139	2.57679	3.00082	2.9282	2.94553	3.20554	3.27642	2.88693	2.87614	2.83432	3.01361	2.93424	2.76007	2.8901	2.79721	3.08325	2.94386	3.03149	3.1177	2.97451	2.97613	2.73999	2.83575	2.77936	2.87673	3.13672	2.95654	2.6954	3.04973	3.01416	3.2834	3.40266	3.19134	3.07336	2.60923	2.90055	2.83778	3.09881	2.76525
OG0003864	Lthed_scf0040.1_g041700.1	Qgl_scf0050.1_g095770.1	AT2G46630.1	AT2G46630.1	I	3.01683	3.72156	3.11918	2.93207	2.80241	3.16508	3.2352	2.14132	0.691686	0.738456	0.850587	3.58452	4.12792	3.58077	3.85986	2.84032	2.17659	2.79612	2.47547	2.25919	1.84359	1.66906	0.840799	1.0846	1.131	3.774	3.8156	4.20254	4.06307	3.42468	3.16908	2.71667	2.82229	1.81499	1.44126	1.36968	1.26537	1.22819	2.44201	4.16239	4.38883	2.69279	2.91289	2.97223
OG0003867	Lthed_scf0070.1_g090040.1	Qgl_scf0080.1_g083570.1	AT2G43320.2	AT2G43320.2	V	4.79321	5.01031	5.45824	4.58457	5.02824	5.09816	3.81808	4.1381	4.4281	3.9341	3.91808	3.82395	4.85915	5.33659	5.69699	4.90195	4.39549	4.46039	4.26001	4.13273	4.14588	4.19779	4.01698	4.66724	3.87695	3.35552	5.073	4.73093	4.54184	4.05513	4.15387	4.35972	3.93619	4.25384	5.22275	5.15145	4.74697	5.11692	3.73869	3.64155	4.42745	4.58976	4.29385	4.17088
OG0003868	Lthed_scf0070.1_g087410.1	Qgl_scf0080.1_g079670.1	AT3G59290.1	AT3G59290.1	I	5.64508	5.71564	5.4047	5.64171	5.47745	5.42205	5.56279	5.7472	5.88162	5.71933	5.67336	5.58032	5.60279	5.58164	5.47696	5.58215	5.19644	5.3278	5.78786	5.77231	5.9814	5.86012	5.45327	6.09173	5.46659	5.48686	5.66374	5.6247	5.8977	5.93283	5.98382	5.93717	5.95352	5.64814	5.94481	6.11536	6.18892	5.99202	5.16132	5.73992	5.92313	5.82552	5.79993	5.4018
OG0003871	Lthed_scf0100.1_g043960.1	Qgl_scf0100.1_g063870.1	AT1G04690.1	AT1G04690.1	I	6.68096	6.11872	5.66484	6.17126	6.05959	5.87924	6.16885	5.55928	4.80596	4.09636	4.57351	6.25213	6.89381	6.55848	6.02276	6.28247	5.75012	6.20542	6.29616	6.28247	5.65639	5.37091	3.88544	3.91838	5.1123	6.42484	6.88008	6.44062	6.78635	6.79414	6.50709	6.56701	6.44366	5.55569	4.70561	5.07211	4.87951	5.66819	5.52092	6.68125	7.1564	6.48047	6.16701	5.82963
OG0003874	Lthed_scf0100.1_g025920.1	Qgl_scf0100.1_g082610.1	AT4G16280.4	AT4G16280.4	III	5.12575	5.37747	5.07699	5.33818	5.37635	5.08896	5.07531	5.22732	5.12335	5.25937	5.42254	5.3369	5.01448	5.2422	5.23088	5.33895	5.32867	4.87981	5.32694	5.19358	5.47531	5.58842	5.22195	5.24927	5.55504	5.14591	4.83531	5.1146	5.10523	5.22937	5.23038	5.3272	5.10398	5.33687	5.66001	5.23026	5.51339	5.06914	5.49373	5.6141	4.94643	5.2907	5.40182	5.26481
OG0003876	Lthed_scf0100.1_g024670.1	Qgl_scf0100.1_g083470.1	AT3G06650.2	AT3G06650.2	I	7.80068	7.34976	7.0037	7.11473	6.79964	7.24551	7.54237	7.527	7.17547	7.15106	7.58105	7.88202	7.58807	7.56196	6.675	7.38936	6.82882	7.39418	7.72217	7.65867	7.50674	7.19972	6.25048	6.672	6.82716	7.92664	7.84335	7.45331	7.88191	7.80842	7.21243	7.31668	7.3107	6.96941	6.92104	6.70182	6.94619	7.58792	7.09401	7.68164	7.60646	7.78527	7.13055	6.80885
OG0003878	Lthed_scf0100.1_g018370.1	Qgl_scf0100.1_g088330.1	AT1G04170.2	AT1G04170.2	IV	5.72074	5.47995	5.31527	5.56431	5.4424	5.29554	5.59078	6.01983	6.28258	6.04627	5.95445	6.35506	5.79149	5.6943	5.46592	5.26569	5.51793	5.45623	5.70488	5.78835	6.00178	6.08328	6.2764	6.31197	5.79332	6.56317	5.7739	5.9715	5.93551	5.8888	6.11077	5.98603	6.08772	6.20035	6.36487	6.55516	6.61521	6.56488	6.3503	6.38233	5.98613	5.73538	5.69627	5.59421
OG0003879	Lthed_scf0100.1_g016150.1	Qgl_scf0100.1_g089290.1	AT4G02500.1	AT4G02500.1	I	6.48657	6.42155	6.32702	6.50416	6.54896	6.4108	6.20794	6.01636	6.12575	5.35993	5.48197	6.07809	6.80132	6.62204	6.49276	6.40586	5.96469	6.45559	6.14882	6.17018	5.75013	5.51188	5.21959	5.50632	6.08001	5.87021	6.47334	6.38129	6.4396	6.68431	6.342	6.30878	6.38196	5.70515	6.91747	6.56338	4.98015	6.24167	5.07863	6.39797	6.45673	6.06629	6.03629	6.30204
OG0003880	Lthed_scf0100.1_g012840.1	Qgl_scf0100.1_g092110.1	NA	NA	IV	2.77216	2.9866	3.07499	3.33151	3.0038	3.05907	3.81346	3.82678	3.77188	4.14195	3.93481	3.77269	3.08749	3.30858	3.02128	3.13556	3.19642	3.23263	3.4046	3.30757	3.52631	4.01939	4.16578	3.49848	3.87419	3.46034	2.86594	2.68468	3.11549	3.05975	3.10847	3.34146	3.29756	3.69348	4.04404	3.87168	4.01068	3.89289	3.96022	3.18342	3.19724	2.954	3.02218	3.244
OG0003882	Lthed_scf0100.1_g007030.1	Qgl_scf0100.1_g098520.1	AT3G06060.1	AT3G06060.2	I	4.52875	4.52699	4.57397	4.76601	4.69579	4.81685	4.75384	4.81162	4.2832	4.16696	4.27207	4.86255	4.91608	4.45961	4.59376	4.60767	4.66761	4.86747	4.63689	4.30617	4.20147	3.93006	3.8266	3.85648	3.97808	4.62744	4.46912	5.04428	5.00315	4.82416	4.90541	4.5981	4.77637	4.17302	3.09183	3.92077	4.1801	3.97959	4.11467	4.84086	5.03409	4.42202	4.56863	4.48899
OG0003883	Lthed_scf0100.1_g006880.1	Qgl_scf0100.1_g098570.1	AT4G14220.1	AT4G14220.1	III	4.16887	4.11947	4.68765	3.99978	4.15969	4.12067	4.26996	4.7195	4.30808	3.94799	4.14336	3.92722	4.63607	4.65411	4.46418	4.44097	4.34812	4.46694	4.3713	4.39449	4.56273	4.37318	4.22162	4.37496	3.8382	4.4255	4.60676	4.75762	4.5047	4.2053	4.71101	4.3717	4.09018	4.82056	3.95093	4.01143	4.66516	4.06063	4.82735	4.398	4.70498	4.86923	4.48814	4.4936
OG0003886	Lthed_scf0100.1_g003480.1	Qgl_scf0100.1_g101700.1	AT3G22530.1	AT3G22530.1	III	5.45549	6.06627	5.83552	5.55876	5.69647	6.09604	5.23934	5.34443	5.35756	5.0671	5.10206	5.10948	5.54484	6.19337	6.52211	5.91278	5.40533	5.55443	5.3842	5.42807	5.40469	5.32594	5.38919	5.5314	5.11986	5.03392	5.80098	6.06265	5.69627	5.63715	5.89944	5.60132	5.62508	5.78521	5.76491	6.1359	6.13486	6.17267	5.23714	5.57802	5.62924	5.62113	5.4585	5.7309
OG0003887	Lthed_scf0100.1_g003420.1	Qgl_scf0100.1_g101740.1	AT3G22540.1	AT3G22540.1	I	1.9438	2.36815	2.13178	3.06365	1.50267	1.67384	1.95925	0.53649	0	0	1.25737	2.2003	1.87943	2.70684	1.36698	1.86622	0.477773	2.09775	3.29795	3.10773	1.46402	0.489059	0.563672	0	2.25584	2.88912	2.89654	3.63919	4.03706	3.81721	3.98754	3.3542	2.61805	1.37095	0.238873	0	0	0	3.21063	3.72534	4.29146	3.60582	3.92306	3.54703
OG0003888	Lthed_scf0070.1_g106280.1	Qgl_scf0080.1_g102560.1	AT5G39740.2	AT5G39740.2	V	9.05335	9.0109	9.08286	9.23247	9.47335	9.18096	9.53971	9.42312	9.50347	9.33188	9.38121	9.98745	9.27624	8.99807	9.02212	8.94208	9.23068	9.14056	9.31124	9.37544	9.70115	9.64131	9.65815	9.60767	9.53605	10.1283	8.99922	9.47354	8.97055	9.12812	9.17049	9.3587	9.45618	9.4216	9.19092	9.01597	8.9398	9.05297	9.38593	9.98419	9.17244	8.68434	8.87221	9.07581
OG0003889	Lthed_scf0070.1_g097330.1	Qgl_scf0080.1_g090670.1	AT3G07560.1	AT3G07560.1	III	5.33857	4.64891	5.0417	4.95416	4.47838	4.84212	4.87277	5.37725	5.30068	5.42138	5.26827	4.96784	4.82592	5.21062	5.14407	5.0046	5.14819	5.14925	4.91436	5.20057	5.77963	5.94803	6.14227	5.93081	5.56705	5.49932	5.25713	5.40445	5.43337	5.68443	5.34578	5.52437	5.4419	5.5907	5.69054	6.04708	6.15268	5.65319	5.13799	5.53474	4.97661	5.34265	5.43677	5.63273
OG0003890	Lthed_scf0100.1_g038530.1	Qgl_scf0100.1_g068340.1	AT4G14300.2	AT2G33410.1	III	6.13318	6.25726	6.56868	6.9249	6.97998	6.85751	6.78613	7.00425	7.18573	7.28494	7.04747	6.40886	6.00531	6.23019	6.08466	6.4592	7.14763	6.57164	6.9009	6.75283	7.39601	7.26636	7.43236	7.34852	7.02719	6.78968	6.38974	6.86555	6.82177	7.03297	7.15056	7.36339	7.69477	7.16899	7.08236	7.20046	7.17804	6.68678	6.30947	6.83848	6.30583	6.70321	6.83704	7.65432
OG0003891	Lthed_scf0100.1_g035150.1	Qgl_scf0100.1_g071850.1	AT5G43310.2	AT5G43310.2	I	4.20408	4.53113	4.39125	4.53435	4.3359	4.06304	4.03271	3.95569	3.88171	4.27744	4.0869	3.8193	4.35009	4.57415	4.5515	4.30471	4.23382	4.27806	4.26492	4.26758	3.71694	4.06089	4.08068	3.63158	3.91825	3.83843	4.25581	4.16462	4.51359	4.70865	4.83363	4.74289	4.66635	4.41148	4.34371	4.31821	4.42477	4.29102	4.26906	4.07716	4.51947	4.57738	4.98487	4.79486
OG0003898	Lthed_scf0070.1_g110420.1	Qgl_scf0080.1_g104920.1	AT2G31800.1	AT2G31800.1	IV	4.44753	4.3017	4.72615	3.96423	4.48761	4.32809	4.26358	3.90601	4.50966	3.78357	3.55694	3.77133	4.15953	4.40481	4.97377	4.35603	4.50206	4.44584	3.32699	3.57977	3.6171	3.46051	3.63409	4.87832	3.52445	3.28548	4.4964	5.20354	4.54415	4.57147	4.55138	4.37762	4.3699	4.41383	6.02002	6.05306	3.80209	4.76823	3.40528	4.35869	4.31368	4.01557	4.27157	4.29214
OG0003901	Lthed_scf0070.1_g115060.1	Qgl_scf0080.1_g109710.1	AT3G59910.2	AT3G59910.2	IV	4.4567	4.43422	4.85659	4.27174	4.71726	4.79524	4.42704	4.61145	4.78993	5.07528	5.0266	4.24586	4.2932	4.51704	4.49396	4.58802	5.30266	4.84531	4.30179	4.49544	4.81341	4.97032	5.07255	5.20824	5.02796	4.69454	4.40705	5.08102	4.85971	4.84632	4.88841	5.0435	5.04142	5.05273	5.40857	5.81128	6.16202	5.98068	5.328	5.00138	4.70604	4.80514	4.68794	4.95658
OG0003902	Lthed_scf0100.1_g042150.1	Qgl_scf0100.1_g065190.1	AT3G23990.1	AT3G23990.1	III	6.18501	4.89424	5.94217	4.81081	5.22306	5.87149	4.92203	5.59749	5.60086	5.59677	5.83398	6.7321	5.51101	5.29177	5.04854	4.53351	5.79135	6.25654	4.93061	4.80294	5.87601	5.93721	5.98576	5.96035	5.24466	6.83838	5.05769	5.82766	5.33741	6.0714	5.40614	5.0368	5.14312	5.60323	6.13059	6.39808	6.89563	7.16304	6.78669	6.51391	5.40505	4.94567	4.713	4.21102
OG0003903	Lthed_scf0020.1_g002950.1	Qgl_scf0030.1_g187620.1	AT5G50430.3	AT1G17280.4	III	5.05717	5.29468	5.35966	5.12431	5.37669	5.22138	5.0274	4.77703	5.49183	5.17289	5.08181	4.93583	4.81804	4.74225	5.51113	5.33002	5.39731	5.2365	5.1293	4.96676	5.44076	5.38878	5.638	6.28304	4.8815	4.45611	4.86987	4.95373	4.88855	4.69226	4.99731	4.93859	4.85866	5.17375	5.68074	5.87287	5.74644	5.70865	5.10189	4.87246	4.9478	5.06741	4.95619	5.03445
OG0003904	Lthed_scf0020.1_g008350.1	Qgl_scf0030.1_g180620.1	AT3G14110.1	AT3G14110.3	II	3.484	3.5785	3.24684	3.56495	3.32586	2.79509	3.04733	2.8538	2.41286	1.8941	2.41312	3.56127	3.62529	2.94234	3.26123	3.04599	3.18626	2.70985	3.30975	3.14426	2.91127	2.65141	2.31836	2.618	2.9245	3.89386	3.07521	3.16948	3.07544	3.44401	3.14187	3.33412	3.32479	3.21426	2.55165	2.00787	1.92687	2.64278	3.42186	4.11851	3.7163	3.1181	3.08681	3.18257
OG0003905	Lthed_scf0020.1_g008360.1	Qgl_scf0030.1_g180610.1	AT1G17370.1	AT1G17370.1	III	6.91915	6.85995	7.05836	6.64357	6.97248	7.04956	7.07726	6.9787	7.21283	7.5242	7.53079	6.72103	6.65756	6.9994	6.94299	6.8955	7.29878	7.00486	6.69291	6.72553	6.61085	7.04717	7.10095	6.9279	7.28114	6.36914	6.66253	7.06882	7.08753	7.18996	7.30376	7.26537	7.09748	7.22148	7.39683	7.60775	7.66111	7.6338	7.31684	7.10786	7.04494	6.96845	7.13276	7.07257
OG0003906	Lthed_scf0020.1_g015800.1	Qgl_scf0030.1_g174310.1	AT3G13990.2	AT3G13990.2	III	5.33143	5.266	4.9658	5.35888	5.28688	5.20378	5.40909	5.53989	5.60642	5.55185	5.56066	5.71123	5.19893	5.22513	5.05579	5.23504	5.11546	5.10555	5.5345	5.49175	5.88035	5.7736	5.7589	5.81126	5.49063	5.77629	5.30462	5.46861	5.43194	5.35573	5.62401	5.43612	5.43148	5.49562	5.60317	5.66425	5.63971	5.4894	5.36903	5.74209	5.38061	5.46447	5.29152	5.27421
OG0003907	Lthed_scf0020.1_g021040.1	Qgl_scf0030.1_g168990.1	AT3G13882.1	AT3G13882.1	I	6.46051	6.23865	5.85666	6.19936	6.46195	6.23214	6.50869	6.29887	6.33097	6.35649	6.57553	6.97437	6.5803	6.70085	6.52106	6.39874	6.2091	6.41961	6.5263	6.25741	6.07185	5.97193	5.96159	5.63213	6.13933	6.43229	6.35708	6.93366	6.96204	6.852	6.90457	6.78471	6.89157	6.54942	5.88831	5.93257	6.23204	6.07426	6.38173	7.08786	6.87102	6.64579	6.71132	6.64213
OG0003910	Lthed_scf0020.1_g028710.1	Qgl_scf0030.1_g160530.1	AT1G51720.3	AT1G51720.3	II	4.80371	4.60659	4.77588	4.31449	4.45962	4.57889	4.3147	3.91523	4.36819	4.4926	4.21315	4.23933	4.42277	4.79155	4.80678	4.7744	4.91658	4.88966	4.27246	4.22672	4.08091	4.34459	4.28352	4.37519	4.22874	4.00443	4.34765	4.50317	4.61323	4.70534	4.73652	4.72996	4.59767	4.39828	4.41444	4.66129	4.60529	4.47566	4.14651	4.3265	4.68824	4.4625	4.64225	4.68405
OG0003912	Lthed_scf0020.1_g044540.1	Qgl_scf0030.1_g138140.1	AT3G16030.1	AT3G16030.2	III	0.291089	0.647459	0.820982	0.732743	0.416865	0.504381	0.167246	0.180595	0.221409	0.405547	0.430627	0.364681	0.074184	0.207454	0.464005	0.357923	0.314225	0.476861	0.21792	0.207142	0.417506	0.135087	0.205499	0.254428	0.112208	0.156513	0.121414	0.357729	0.314157	0.352472	0.3889	0.320358	0.373844	0.385032	0.850363	0.955875	0.23607	0.405586	0.697331	0.444633	0.609367	0.362664	0.644214	0.521267
OG0003913	Lthed_scf0020.1_g048270.1	Qgl_scf0030.1_g133820.1	AT3G15990.1	AT3G15990.1	I	3.41008	2.28111	2.67971	2.09095	2.3711	1.82966	2.38879	0.892177	0.161327	0.107259	0.81622	3.54403	3.4859	4.07531	3.88295	0.928879	1.06622	1.57403	1.64888	1.40353	0.429381	0.438736	0.146073	0	1.49164	3.23307	4.11444	5.27055	2.66255	3.1172	1.61194	2.0709	1.27234	0.768408	1.11453	0.945681	2.00829	2.73872	4.29893	4.8864	4.28648	2.04328	2.42474	1.90968
OG0003915	Lthed_scf0020.1_g063730.1	Qgl_scf0030.1_g116600.1	AT3G15620.1	AT3G15620.1	II	4.54753	4.41911	3.56582	4.03695	3.74073	3.33155	4.03027	3.9917	3.86143	3.51226	3.66025	4.22526	4.79806	4.47414	3.75511	3.703	3.27239	3.03482	3.58415	3.73506	3.68482	3.68956	3.32198	3.18267	3.69187	3.96743	4.57383	3.89608	4.23616	3.54772	4.11031	4.12919	3.80196	4.12658	4.18533	3.50956	3.53891	3.41545	4.20121	4.27586	5.06139	4.39744	3.80876	3.74051
OG0003917	Lthed_scf0020.1_g055870.1	Qgl_scf0030.1_g123940.1	AT3G15730.1	AT3G15730.1	I	7.73123	7.55112	7.3453	7.83172	7.66547	7.37346	7.53336	7.5609	7.61794	7.57409	7.46056	6.81025	7.56482	7.95954	8.15842	7.57426	7.44375	7.2341	7.51183	7.6525	7.40729	7.58957	7.70647	8.62383	7.54584	7.01373	7.81737	7.7738	7.82113	7.96529	7.97079	8.07765	8.18932	7.80193	7.88987	7.54383	7.49427	7.47865	7.17219	7.85004	8.11116	7.83618	8.00093	8.10192
OG0003919	Lthed_scf0020.1_g059120.1	Qgl_scf0030.1_g120980.1	AT1G52540.1	AT1G52540.1	I	5.39376	5.14421	5.04921	5.333	5.17492	5.38822	5.32397	5.02262	4.55307	4.34991	4.56678	5.02957	5.61827	5.47911	5.44807	5.41261	5.36241	5.27291	5.37474	5.43481	5.21676	4.84342	4.39972	4.72497	4.88755	5.42241	5.70624	5.35367	5.55563	5.4604	5.68878	5.42657	5.40594	5.10611	4.88726	4.6789	4.90496	4.45456	5.06099	5.83246	5.63709	5.59316	5.20627	5.44512
OG0003920	Lthed_scf0020.1_g061770.1	Qgl_scf0030.1_g118910.1	AT1G15750.4	AT1G15750.4	I	6.49	6.70146	6.61104	6.09057	6.38766	6.41448	6.21299	5.74729	5.89809	5.95549	5.50459	5.75849	6.55928	6.7375	6.66383	6.53623	6.64792	6.56621	6.28875	6.13268	6.15956	5.96874	6.13674	6.34223	5.99275	5.85613	6.35641	6.18745	6.30707	6.49814	6.53487	6.38358	6.31145	5.84554	6.3487	6.25453	5.84318	5.59246	5.93432	6.20443	6.47841	6.41148	6.55795	6.30503
OG0003921	Lthed_scf0020.1_g060120.1	Qgl_scf0030.1_g120110.1	AT1G15780.1	AT1G15790.4	III	5.18317	4.97789	5.29942	5.07179	5.13484	5.07707	5.27199	5.23461	5.41047	5.6086	5.20941	5.41305	4.62806	4.26379	4.81977	4.56155	4.42285	4.52862	4.42505	4.84618	4.69366	5.08075	5.00529	5.04246	4.84169	4.71218	5.06274	5.10871	5.30735	5.1805	5.19371	5.1902	5.09253	5.21096	5.11114	5.31189	5.54841	5.28733	4.92994	5.39434	5.2699	5.09752	5.10338	5.19415
OG0003922	Lthed_scf0020.1_g066510.1	Qgl_scf0030.1_g113700.1	AT1G15880.1	AT1G15880.1	III	3.92522	3.66752	4.36369	4.40672	3.65749	3.18309	3.89807	4.10954	4.20253	3.36951	3.1575	3.52149	3.47559	4.0616	4.11158	3.7152	3.68275	3.91807	3.98819	3.75698	3.35034	3.43426	3.48244	3.22197	3.64015	3.95091	4.13333	3.71227	4.0349	4.33252	4.0104	3.9013	4.14895	3.96773	3.85356	3.70657	3.59393	3.28158	3.62109	4.15104	3.96348	4.02548	4.05917	3.98962
OG0003923	Lthed_scf0020.1_g067290.1	Qgl_scf0030.1_g112630.1	AT4G31880.1	AT1G80810.5	III	4.06185	4.21424	4.50282	4.10451	4.4095	4.49249	4.21192	3.64842	3.16705	3.41301	3.63486	3.73677	3.51066	3.94973	3.94852	4.35462	4.69247	4.13947	4.13176	4.09932	4.08317	3.74778	3.30564	2.95776	4.04948	3.45421	3.58541	3.62502	3.80167	3.99068	3.98582	4.31077	4.10391	3.90524	3.28796	2.58814	2.04872	2.59199	3.46872	3.63343	3.7789	3.9878	4.28013	4.28994
OG0003924	Lthed_scf0020.1_g072280.1	Qgl_scf0030.1_g109110.1	AT1G80920.1	AT1G80920.1	V	5.6934	5.63627	6.04604	6.29153	6.10245	5.50596	5.40549	4.97743	4.59193	6.0857	5.77823	4.7999	5.47268	5.31798	5.86976	5.22912	5.61637	4.96045	4.95477	5.49669	4.339	5.49612	6.94282	6.55011	4.49882	5.28793	5.84548	5.12569	5.33179	6.27693	5.36605	6.15045	5.55162	4.11342	4.58854	4.39042	5.61267	4.10547	5.34298	4.21458	6.31254	5.05137	6.50388	6.11772
OG0003925	Lthed_scf0040.1_g029940.1	Qgl_scf0050.1_g107750.1	AT1G01940.1	AT1G01940.1	III	4.99108	4.5668	4.70494	4.32036	4.84351	4.94431	4.68614	4.12459	4.11987	4.44539	3.71269	4.93819	4.58538	5.08543	4.84966	4.6596	4.67172	5.26939	4.20378	4.25002	4.41988	4.80042	4.22999	5.12078	4.2704	4.59954	4.37671	4.46226	4.14924	4.22781	4.39394	4.56926	4.60901	4.52074	4.66598	4.59747	4.74403	4.0222	3.70784	4.79974	4.65198	4.19402	3.96789	4.42862
OG0003928	Lthed_scf0040.1_g028710.1	Qgl_scf0050.1_g108730.1	AT2G45290.2	AT2G45290.2	II	7.36205	7.12858	7.19413	7.01593	6.78766	6.9877	7.45039	7.79379	7.78704	7.93253	7.70295	7.46645	7.75797	7.38092	6.97761	7.0374	7.34769	7.0979	7.34966	7.44327	7.43706	7.78072	7.73233	7.538	7.8647	7.58	7.60346	7.90265	7.80495	7.78681	7.71875	7.86415	8.06821	8.31012	8.22754	7.8854	7.94391	7.76323	7.93707	8.13871	8.06253	8.2392	7.40007	7.93197
OG0003929	Lthed_scf0040.1_g028450.1	Qgl_scf0050.1_g109140.1	AT3G52180.1	AT3G52180.1	IV	3.49102	3.79218	3.48718	4.04836	3.65249	3.21198	5.25637	6.98424	7.66212	7.50938	6.96008	5.2125	4.40889	3.75312	3.69192	3.04195	3.69566	2.83032	4.82425	5.57492	6.55462	7.47792	7.68937	7.44	6.64782	4.54703	3.98834	5.2122	4.62349	2.9983	4.55576	4.96316	5.20594	7.04965	7.53438	7.37681	7.22357	7.2706	6.91717	5.6067	4.4253	4.92518	4.30247	4.59169
OG0003930	Lthed_scf0040.1_g026940.1	Qgl_scf0050.1_g110500.1	AT2G39210.1	AT2G39210.1	IV	1.79189	2.9491	2.30102	2.54174	2.60008	2.68951	0.971409	3.35647	4.76492	4.29619	2.67833	0.519065	1.57184	1.1648	2.13178	3.03471	2.51288	2.43829	1.2714	2.00451	3.09309	4.04116	4.61909	5.31343	3.55237	0.646421	1.54842	2.58228	2.08235	2.79486	2.63135	2.33148	2.51683	3.37635	4.90343	6.09867	4.45476	3.23651	2.45631	2.02866	2.09554	2.1496	2.83346	3.46346
OG0003931	Lthed_scf0040.1_g026370.1	Qgl_scf0050.1_g111240.1	AT3G10390.2	AT3G10390.3	II	3.19173	2.92723	3.44041	3.31311	2.93825	3.4449	3.21191	3.20541	3.36656	3.43479	3.50503	3.41393	2.66203	3.06233	2.82729	3.34214	3.43817	3.45333	3.20707	3.12539	3.19071	3.2807	3.47795	3.2998	3.40795	3.24313	2.57762	3.05395	3.18766	3.25393	3.43685	3.37828	2.99254	3.51875	2.83062	3.25216	3.79852	3.43561	3.20598	2.80674	3.02984	3.23717	3.3114	3.27128
OG0003933	Lthed_scf0040.1_g021560.1	Qgl_scf0050.1_g115520.1	AT2G35800.1	AT2G35800.1	II	4.31309	4.44364	4.61839	5.04978	4.59888	4.49585	4.62708	5.03933	4.64438	4.89235	4.81357	4.65472	4.59391	4.54057	4.84574	4.65863	4.70027	4.48036	4.86222	4.84468	5.04448	5.13443	5.38806	5.13775	4.78013	5.33098	4.49248	4.99407	4.91694	4.79348	5.16821	5.0718	5.04579	5.12685	5.27245	5.16195	5.2445	4.82243	5.00774	5.05332	5.05587	5.05021	4.9551	5.20787
OG0003934	Lthed_scf0040.1_g021550.1	Qgl_scf0050.1_g115540.1	AT3G52300.1	AT3G52300.1	III	7.59317	7.53959	7.26189	7.4755	7.19511	7.20174	7.60893	7.32886	7.04119	6.71826	6.83012	8.02257	7.82429	7.74198	7.33527	6.99059	6.76526	7.34033	7.57432	7.4219	7.1598	7.23607	6.595	7.00134	6.93148	8.32211	7.82726	7.65581	7.54257	7.58173	7.19152	7.40947	7.35949	7.12952	6.9205	6.75277	6.79567	7.04842	7.32356	8.14882	7.8444	7.33283	7.22842	7.08323
OG0003935	Lthed_scf0040.1_g020400.1	Qgl_scf0050.1_g116910.1	AT2G39290.1	AT2G39290.1	IV	3.72608	3.5457	3.14555	4.21351	3.88328	3.77965	4.22489	4.88065	4.8646	4.82501	4.84957	4.636	4.27041	4.06966	3.76673	3.66828	3.30017	3.71827	4.3112	4.34156	4.79318	4.8309	4.98481	5.23871	4.64606	4.76386	4.44285	4.76274	4.64321	4.31606	4.38614	4.23464	4.13969	4.97888	4.95709	5.37299	5.67594	5.55898	5.22276	5.16533	4.5148	4.56728	3.78907	3.98859
OG0003936	Lthed_scf0040.1_g020090.1	Qgl_scf0050.1_g117190.1	AT3G53500.2	AT3G53500.2	V	5.89704	6.0591	6.38251	6.85593	6.39734	6.40918	6.24164	6.38133	6.70371	6.46696	6.14245	6.44759	5.95441	5.84673	6.05412	6.00836	6.29442	6.09014	6.20547	6.11236	6.69659	6.48414	7.43258	7.05709	6.26414	6.53527	6.0614	6.3113	6.15007	6.33018	6.49534	6.45635	6.3809	6.30921	6.2682	6.3184	6.41558	5.84568	6.05273	6.59049	6.26856	6.01249	6.15435	6.73065
OG0003938	Lthed_scf0040.1_g016450.1	Qgl_scf0050.1_g119550.1	AT5G59350.3	AT5G59350.3	III	3.96416	4.3779	3.55586	4.42453	4.08756	3.70103	3.81261	3.47959	3.765	3.59309	3.85312	3.73973	4.9699	4.708	4.45389	3.93816	3.3236	3.26202	4.0965	4.07973	4.42134	3.75304	3.07979	2.74268	3.89021	3.69401	4.70008	5.24313	5.25304	4.2859	4.72984	4.42455	4.66507	4.43089	3.04848	2.24297	3.26517	4.14951	4.5667	4.91322	4.78422	4.99985	4.76083	4.48442
OG0003940	Lthed_scf0040.1_g011500.1	Qgl_scf0050.1_g123260.1	AT3G55580.1	AT3G55580.1	II	4.78162	3.56003	3.9749	3.88429	3.74438	3.80453	4.24803	4.75568	4.79019	4.64817	4.60347	4.25246	3.76449	4.60251	4.05076	4.02813	3.8541	4.77275	4.43037	4.29789	4.85419	4.90823	4.89008	5.08514	4.54234	3.75093	4.4459	4.7172	4.73692	3.50162	4.47865	4.28121	4.06283	4.50069	4.69005	5.25881	5.03728	4.96666	3.87366	3.63336	3.73061	4.47976	3.37546	4.39995
OG0003943	Lthed_scf0040.1_g008810.1	Qgl_scf0050.1_g125740.1	AT3G55830.1	AT3G55830.1	V	3.4677	3.91263	3.80014	3.81205	4.0084	3.80408	3.96043	3.70547	5.00364	4.22823	3.81673	2.94248	3.65725	3.8912	4.0409	3.76329	3.72751	3.60315	3.54967	3.89178	4.03704	4.41971	4.91384	5.26047	3.76501	3.26511	3.79018	4.23195	3.76649	3.85263	4.10371	3.98721	4.06823	4.36195	5.06206	5.88757	4.73289	4.60194	3.85356	3.11906	3.50049	3.84633	4.18238	4.18661
OG0003944	Lthed_scf0040.1_g007370.1	Qgl_scf0050.1_g126580.1	AT2G40070.1	AT2G40070.1	I	4.63095	4.67656	4.7621	4.52011	4.35356	4.41041	4.63012	4.12573	4.17433	3.75999	4.46084	4.78189	4.67521	4.67763	4.13297	4.52915	4.44102	4.64207	4.78263	4.59106	4.66329	4.2777	4.06214	4.46166	4.22931	4.59778	4.56405	4.51939	4.67529	4.64816	4.75743	4.68849	4.68898	4.20874	3.97232	3.62995	4.05331	4.24959	4.54806	4.59138	4.72583	4.60767	4.36422	4.40219
OG0003948	Lthed_scf0040.1_g000660.1	Qgl_scf0050.1_g132530.1	AT3G54190.1	AT3G54190.1	IV	4.63371	4.88281	4.28659	4.75216	4.48647	4.59918	4.82484	4.82232	5.10712	5.0327	5.1447	4.74651	4.89379	4.65761	4.44068	4.59124	4.47842	4.61736	4.7931	4.74196	4.80468	4.96237	5.07424	5.33129	5.33228	4.85518	4.84984	4.81544	4.92468	4.90643	4.7254	4.62572	4.38924	4.69186	5.32374	5.54348	5.18926	5.51796	5.17815	5.15505	5.01635	4.86794	4.49668	4.50706
OG0003949	Lthed_scf0100.1_g104190.1	Qgl_scf0100.1_g000880.1	AT2G17520.1	AT2G17520.1	V	4.27571	4.64175	4.67172	4.47025	4.22456	4.54992	4.51637	4.98702	5.12102	5.52884	5.09896	3.98113	4.21879	4.70445	4.5394	4.58449	4.87993	4.68308	4.59784	4.65548	4.57614	5.24338	5.22097	5.26442	4.9885	3.83828	4.33178	4.55265	4.54144	4.4133	4.88726	4.66084	4.72807	4.99571	5.32081	5.59997	5.69742	5.27008	4.71237	4.1669	4.32858	4.80645	4.77176	5.05244
OG0003950	Lthed_scf0100.1_g102740.1	Qgl_scf0100.1_g002490.1	AT3G51390.1	AT3G51390.1	I	4.21066	4.60676	4.04887	4.41416	4.3345	3.9727	4.3976	4.21398	4.3755	4.32054	4.61039	4.47878	4.62483	4.51897	4.0378	4.29525	4.2427	4.56155	4.61272	4.58548	4.14603	4.43602	4.20416	4.47987	4.46279	4.55148	4.64462	4.88564	5.003	4.88912	4.77982	4.75892	4.58092	4.83714	4.71355	4.85603	4.78566	4.39342	4.45959	4.72403	4.82871	4.8041	4.64155	4.90555
OG0003952	Lthed_scf0040.1_g014060.1	Qgl_scf0050.1_g121010.1	AT5G27990.2	AT5G27990.2	III	4.8915	4.47541	4.30286	4.68168	5.03595	4.31215	4.99926	5.03705	5.00498	5.48064	5.18829	5.44847	4.66784	4.68907	4.49757	4.35287	4.2512	4.47912	4.61448	4.7535	4.67968	5.15144	4.96901	4.83345	4.86831	5.29993	4.68769	5.06056	4.86426	5.29222	5.20191	5.17816	5.4961	5.08199	5.19247	5.79228	5.67152	5.58926	4.99329	5.05933	4.80634	4.71469	4.87912	5.03761
OG0003953	Lthed_scf0010.1_g033140.1	Qgl_scf0020.1_g031900.1	AT5G16970.1	AT5G16970.1	III	2.53783	3.47129	3.39459	3.22584	3.31725	3.60923	3.88264	3.24786	3.86295	3.55214	3.94523	3.02049	2.66827	3.05828	3.41144	3.3217	2.94734	3.18346	3.37056	3.78639	2.99452	3.5125	4.01724	3.19538	3.37485	2.11459	2.8152	3.285	3.39762	3.62495	3.97271	4.24263	4.30034	4.14301	4.02888	3.62892	3.3102	4.05151	4.2742	4.00884	4.05464	3.44375	3.41726	3.88179
OG0003960	Lthed_scf0050.1_g105270.1	Qgl_scf0040.1_g125210.1	AT5G27840.1	AT5G27840.1	III	4.99943	5.2288	4.9661	5.19344	5.05717	5.20193	4.67431	4.77661	5.36419	5.36723	5.32963	4.23201	4.99558	5.464	5.45071	5.32716	5.24591	5.09689	4.93322	4.93791	5.06725	5.18027	5.62456	5.86094	4.86509	4.95289	5.39285	5.61391	5.3783	5.2996	5.31703	5.22255	4.99157	5.20695	6.08789	6.26099	6.33179	6.04612	5.0915	4.71582	5.08695	5.14231	5.47635	5.36795
OG0003964	Lthed_scf0120.1_g056540.1	Qgl_scf0120.1_g050590.1	AT3G62640.1	AT3G62640.1	I	2.94778	2.45116	1.84475	2.82414	3.637	4.27671	3.78137	1.6289	3.34744	3.61344	3.91962	3.96854	2.94721	2.65318	2.14893	2.75099	3.32287	3.9118	2.73008	3.08172	2.55068	1.52898	1.62155	0.890162	2.25709	3.23852	2.43844	3.0823	2.20546	2.84344	2.20746	2.81564	2.13441	3.07661	1.50752	0.611999	0.573199	1.28622	1.82283	1.95218	3.28681	0.918616	0.603399	2.5356
OG0003965	Lthed_scf0050.1_g112650.1	Qgl_scf0040.1_g138320.1	AT1G56570.2	AT1G56570.2	IV	1.63001	0.893357	2.20498	1.16894	2.02753	2.07144	1.87467	2.13698	2.22744	2.06836	2.36194	2.32176	1.88419	1.18892	1.22391	1.49434	2.09066	1.68407	1.93783	2.06692	2.27388	2.08974	2.00254	2.08363	2.35033	2.31864	1.66612	1.5302	1.14479	1.04554	1.0839	0.739229	1.15683	1.52464	1.98979	1.37081	1.17838	1.19984	1.81006	1.96665	1.1998	1.38649	1.01136	1.16736
OG0003971	Lthed_scf0100.1_g076640.1	Qgl_scf0100.1_g037830.1	AT5G10520.1	AT5G10520.1	I	3.20212	3.68622	3.54816	2.85595	3.79615	4.21813	4.85039	4.04118	3.98397	3.74794	3.29289	3.07415	3.69383	4.0753	4.08849	3.24157	3.61665	3.37235	3.72536	4.3691	4.17982	4.05028	4.53288	3.54494	2.80356	2.88992	3.46155	3.88972	3.88311	3.81322	5.00898	4.79502	4.8978	4.697	4.75975	3.78468	2.68585	2.3294	2.4558	2.82464	4.17373	3.78893	4.28715	4.35262
OG0003972	Lthed_scf0100.1_g076560.1	Qgl_scf0100.1_g037950.1	AT5G10510.6	AT5G10510.6	I	1.64339	0.88431	0.829347	2.1502	1.83799	1.25233	1.73185	3.56096	2.08327	1.59686	1.82309	1.95145	0.981183	0.820329	0.952425	0.790879	0.290618	1.37508	1.83416	1.64509	2.58998	1.97638	1.36893	1.13671	1.4331	1.89622	1.20342	0.937735	1.30715	0.892856	0.731988	0.895545	1.06521	1.3988	1.93182	1.30076	0.992405	1.40371	1.55043	2.27762	1.01723	0.782209	0.434222	0.875353
OG0003975	Lthed_scf0050.1_g091790.1	Qgl_scf0040.1_g103170.1	AT5G56750.1	AT5G56750.1	I	4.38015	4.02526	4.02863	3.85488	4.32371	4.07754	3.64044	3.28532	3.69441	2.60001	2.85664	4.13015	4.70759	4.32949	4.04887	3.83847	3.57646	4.52322	3.78051	3.42164	3.44032	3.12437	2.98994	3.41518	3.0285	4.67469	4.24929	4.25201	4.40952	4.3753	3.71474	3.56567	3.57684	2.81685	3.73338	3.47789	2.65124	3.92501	3.56619	4.48482	4.39533	3.79875	3.6189	3.63445
OG0003977	Lthed_scf0050.1_g091530.1	Qgl_scf0040.1_g103040.1	AT4G14746.1	AT4G14746.1	I	4.99264	4.46556	4.021	4.21262	3.80077	4.24226	3.45902	3.72509	4.54591	4.0556	4.22737	2.83849	3.00925	2.74603	3.43437	4.35728	4.0515	4.13777	3.99098	3.89635	3.23644	3.61139	4.18352	4.31187	3.52208	2.69432	2.61866	3.98338	3.98312	4.46469	3.28333	3.08401	3.30211	3.69906	4.01022	3.41258	3.31877	2.61499	2.93619	2.97535	2.72162	4.38484	4.80645	4.50462
OG0003979	Lthed_scf0050.1_g089580.1	Qgl_scf0040.1_g099790.1	AT5G28840.2	AT5G28840.2	I	9.0014	8.63979	8.09072	8.21866	8.04458	8.03301	7.87072	7.94885	7.88795	7.77105	7.70146	7.46983	9.2167	9.3564	9.22806	8.50369	8.59748	8.04662	8.39738	8.02415	8.02032	7.91847	7.70868	7.79003	7.72465	7.75078	9.69494	8.33966	7.99198	7.85328	7.72979	7.79858	7.46443	7.52256	7.8706	7.73028	7.36929	8.00984	7.94613	8.01602	8.77057	8.27597	8.05414	7.71387
OG0003981	Lthed_scf0050.1_g084730.1	Qgl_scf0040.1_g093220.1	AT1G54460.1	AT1G54460.1	I	6.56389	6.64443	6.51518	6.90003	6.76788	6.66881	6.76457	6.61318	6.61169	6.80165	6.6358	6.12761	6.81623	6.65309	6.74353	6.77562	6.72926	6.63468	6.8909	6.77128	6.67924	6.7058	6.96146	6.73968	6.54788	6.27703	6.69695	6.50095	6.6667	6.73662	6.82898	6.86432	6.88756	6.56805	6.49456	6.28574	6.46064	5.94055	6.42775	6.50872	6.89798	6.69496	6.86866	7.00525
OG0003985	Lthed_scf0050.1_g075340.1	Qgl_scf0040.1_g083660.1	AT3G04260.1	AT3G04260.1	II	3.01345	3.01794	3.18259	3.13864	2.89198	3.15448	2.94264	2.77954	2.92901	3.1779	3.0438	3.32348	2.25346	2.54094	2.16241	2.60952	3.14542	2.38016	2.50031	2.4934	2.42849	2.51459	2.60885	2.50264	2.89016	2.97978	2.28367	2.59651	2.75855	3.01084	2.89404	3.21602	3.10546	3.00349	2.81685	2.66979	2.37404	2.44967	2.79857	3.20027	3.00454	2.82214	3.13329	3.19991
OG0003988	Lthed_scf0060.1_g105400.1	Qgl_scf0090.1_g014040.1	AT1G05840.1	AT1G05840.1	I	4.20832	4.02156	3.81635	3.77144	4.10409	3.74175	4.0817	4.44749	4.53027	3.5178	3.77582	3.96699	4.66977	4.6004	4.23198	4.06031	3.91749	3.83741	3.95488	4.13066	4.03772	4.1621	4.12124	4.57159	3.762	4.72912	4.49074	4.66654	4.67315	4.58653	4.53654	4.46047	4.38483	4.36616	4.62584	4.52376	4.85732	4.74707	4.5273	4.78257	4.99473	4.54388	4.55836	4.37305
OG0003991	Lthed_scf0120.1_g085630.1	Qgl_scf0120.1_g075300.1	AT3G63410.1	AT3G63410.1	II	6.59613	6.53821	6.43776	6.4799	6.53136	6.63715	6.63668	6.08991	5.99035	6.22938	6.1076	6.03988	6.73612	6.81794	6.7875	6.68024	6.98339	6.6862	6.65181	6.6108	6.60384	6.43426	6.18383	6.12391	6.43999	6.3896	6.78223	6.47803	6.75084	6.78691	6.80092	7.03754	7.00217	6.63866	6.41955	5.96545	5.91212	6.06656	6.42166	6.55728	6.965	6.83096	7.03036	6.99244
OG0003992	Lthed_scf0120.1_g084650.1	Qgl_scf0120.1_g074590.1	AT4G02680.1	AT4G02680.1	III	5.30037	5.40495	5.10491	5.25954	5.19297	5.25623	5.38531	5.58419	5.45642	5.37084	5.58163	5.29489	5.642	5.71564	5.46549	5.09538	5.19404	5.10546	5.69899	5.525	5.93993	5.6683	5.78275	5.90681	5.63332	5.50377	5.79004	6.44396	6.19856	5.75042	5.90931	5.66563	5.62586	5.78574	5.56777	5.62421	6.07136	6.34255	6.48032	6.37128	5.97353	6.1344	5.92195	5.80806
OG0003993	Lthed_scf0120.1_g047470.1	Qgl_scf0120.1_g043180.1	AT3G06190.1	AT3G06190.1	I	5.90332	5.84744	6.11012	5.96213	6.19101	6.09851	5.69863	5.9722	5.78106	5.68681	5.81038	5.9897	5.81125	6.26512	6.36506	5.99966	5.99948	6.07559	5.86499	5.75553	5.83266	5.76335	5.66776	6.19823	6.18772	6.28635	5.75652	5.74417	5.80328	5.82031	5.78654	5.76551	5.572	5.5467	6.39726	6.80957	5.89987	6.43642	5.56962	5.79621	5.71501	5.80374	5.82806	5.78312
OG0003995	Lthed_scf0120.1_g048110.1	Qgl_scf0120.1_g044000.1	AT3G29350.1	AT1G03430.1	V	6.23107	5.86092	6.61792	5.80131	6.60189	6.39424	5.88059	5.24024	6.09148	6.08819	5.89156	5.49292	5.85979	6.10766	6.60397	6.47515	6.75244	6.58988	5.84662	5.68735	5.07756	5.62288	6.21656	5.99672	5.89108	5.39618	5.72808	5.69962	5.79374	6.31225	5.98659	6.08643	6.2728	5.70352	5.14813	5.67714	6.07583	5.70123	5.61776	5.95056	6.07417	5.76907	5.85637	6.4534
OG0003998	Lthed_scf0120.1_g051070.1	Qgl_scf0120.1_g046070.1	AT1G03010.1	AT1G03010.1	I	2.77712	2.59723	2.5309	2.24362	2.95829	2.19982	1.67457	1.31412	0.113941	0.264264	1.04852	2.8041	3.56733	3.51562	3.59345	2.66334	1.96385	2.74556	1.85179	1.49024	1.01981	0.418036	0.109532	0.130614	1.01887	2.60166	3.58001	3.36367	3.07768	2.93304	1.97422	2.06422	1.94869	0.962112	0.145643	0	0.0674152	0.6729	1.81541	3.79303	3.86337	2.94438	2.77379	2.18878
OG0003999	Lthed_scf0120.1_g061380.1	Qgl_scf0120.1_g055090.1	AT3G62770.1	AT3G62770.1	IV	7.12324	7.34466	7.49332	7.13543	7.58359	7.29997	7.28934	7.05921	6.96757	7.40251	7.15782	6.79373	6.76915	7.37687	7.62735	7.50692	7.74022	7.37525	7.01088	6.93653	6.87483	7.0288	7.25324	7.19194	6.69999	6.17009	6.66634	6.72757	6.75663	6.65306	6.96607	6.98891	6.87637	6.62016	6.39283	7.08224	7.15286	6.55998	5.86397	6.30373	6.64708	6.4974	6.72564	7.19812
OG0004003	Lthed_scf0120.1_g037710.1	Qgl_scf0120.1_g033840.1	AT4G01250.1	AT4G01250.1	III	0.905437	1.88513	2.69364	2.22863	2.5716	1.94609	1.70512	1.83084	2.22466	3.57145	3.38954	2.02229	1.25764	1.67882	2.42625	2.17668	2.36581	2.40173	1.68167	1.74033	1.98219	2.60485	3.39164	3.0579	2.95715	1.29105	1.66705	2.59022	2.73476	3.20741	3.26891	3.65085	4.01058	3.1665	3.1634	3.2787	4.45828	3.73122	4.50574	2.61051	2.44935	3.31241	4.14346	4.13857
OG0004005	Lthed_scf0120.1_g070290.1	Qgl_scf0120.1_g062360.1	AT3G62160.1	AT3G62160.1	I	5.29183	4.45744	3.50269	4.3044	3.87446	3.58855	2.88468	3.80739	2.02496	1.0315	0.477259	0.648605	2.45917	4.53841	3.67299	3.91519	3.39174	3.8665	3.53058	3.73857	2.73245	2.00366	1.18385	1.27399	0.886129	1.3309	3.97466	2.847	4.05193	3.76323	2.96555	2.40852	3.34978	1.64558	1.62155	0.46606	0.44022	0.629915	1.00446	1.70516	3.18021	4.29061	3.10563	2.52564
OG0004006	Lthed_scf0090.1_g071620.1	Qgl_scf0060.1_g039960.1	AT3G62040.1	AT3G62040.1	IV	4.08786	4.54992	4.9491	4.03362	4.22356	3.91218	3.05091	2.58995	2.53923	2.5802	2.46422	2.74709	3.864	4.71228	4.88408	4.59131	5.20969	3.97459	3.18335	3.06877	3.07928	2.85205	2.35685	3.17723	2.72274	3.54751	4.63819	4.57759	4.60637	4.55126	4.43637	4.28507	4.4797	3.77572	4.1506	4.40427	5.27556	5.52006	5.065	5.27389	4.9922	5.10993	5.042	4.85406
OG0004007	Lthed_scf0010.1_g166730.1	Qgl_scf0020.1_g144870.1	AT1G21065.1	AT1G21065.1	II	5.80568	6.30352	6.00652	5.51278	5.82566	5.7325	5.81693	5.71168	6.15991	6.60375	6.29972	6.25065	5.61248	6.0303	6.0383	5.75889	6.04561	5.75968	5.71362	5.80572	5.74895	6.27557	6.20074	6.3234	6.58907	6.01633	5.95489	6.09719	6.12234	5.96421	6.02293	6.13796	6.24572	6.44148	6.91316	7.00533	6.80981	6.80982	6.57306	6.34712	5.96161	6.10568	6.21151	6.33363
OG0004008	Lthed_scf0010.1_g172870.1	Qgl_scf0020.1_g169110.1	AT1G76130.2	AT1G76130.2	II	2.44457	2.69104	3.2939	2.5891	2.37223	3.09296	2.7038	3.35749	2.87394	2.72035	2.57333	2.7643	2.47484	2.90476	2.158	2.9197	2.62114	2.85377	2.98558	3.00007	3.15282	3.23476	2.91087	3.57824	2.85011	3.29088	3.00428	2.65309	3.09198	2.72011	2.91474	2.83112	2.68507	3.0177	3.01306	2.91315	3.5703	3.40085	3.32308	3.2232	2.98288	3.0115	2.33699	2.68838
OG0004010	Lthed_scf0010.1_g180160.1	Qgl_scf0020.1_g174570.1	AT3G54350.5	AT3G54350.5	I	2.22075	2.59173	2.63962	2.42877	2.14068	2.84981	2.50669	2.36409	2.13632	1.26624	2.24811	2.95489	2.2173	2.28323	2.07567	2.38725	2.85237	2.46749	2.53224	2.56776	2.86825	2.57966	2.49337	2.58579	2.25129	3.26642	2.19425	2.79664	2.05177	2.58494	1.97177	2.03449	2.39743	2.56128	2.39679	1.92701	2.46077	2.92305	3.14205	3.19513	2.19105	2.23914	1.82063	1.54749
OG0004013	Lthed_scf0010.1_g135930.1	Qgl_scf0020.1_g127620.1	AT5G21140.1	AT5G21140.1	III	2.87447	2.91793	1.6866	2.94763	3.26934	2.67346	2.90407	2.32867	2.33082	1.74192	2.10616	3.78052	2.76199	2.78121	2.69729	2.64693	2.02961	2.34032	2.6493	2.39409	2.30083	2.56884	2.80801	2.6422	2.07146	3.21128	2.55229	2.89604	2.73207	2.72366	2.44324	2.5271	2.65846	2.53397	2.33266	2.72838	2.73721	2.49887	2.87897	2.83099	2.98973	2.84907	2.65687	2.21475
OG0004014	Lthed_scf0010.1_g136230.1	Qgl_scf0020.1_g128140.1	AT1G76850.1	AT1G76850.1	V	5.60321	5.29732	5.25097	5.31673	5.34942	5.17379	5.20797	4.99773	4.92017	4.85523	4.77102	5.19624	5.46423	5.53725	5.36605	5.3403	5.41047	5.343	5.18542	5.1347	4.83443	4.96525	4.55772	4.88432	4.86031	5.09608	5.31756	5.17306	5.31341	5.35973	5.26894	5.3048	5.10561	4.95078	4.89848	4.89203	4.94309	4.76767	4.79278	5.26907	5.42409	5.1162	5.12148	5.08002
OG0004015	Lthed_scf0120.1_g080070.1	Qgl_scf0120.1_g071050.1	AT3G28670.3	AT3G28670.3	III	2.69309	2.97227	2.49789	2.92512	2.95429	3.12428	3.0415	2.78595	3.00884	3.20457	3.16116	3.4897	2.91531	2.3852	2.66017	2.45269	2.58324	2.39825	2.61647	3.00491	2.69055	2.89936	2.84181	2.91271	2.71618	3.20595	2.56375	2.3047	2.613	2.34516	2.39962	2.57118	2.41314	2.53818	2.71907	2.59315	3.02261	2.89608	2.91506	2.81987	2.49548	2.5334	2.33725	2.27034
OG0004016	Lthed_scf0090.1_g029280.1	Qgl_scf0060.1_g080930.1	AT4G24560.1	AT4G24560.1	III	5.0286	4.87055	5.09438	4.71806	5.03125	4.98163	4.97862	5.03977	4.76549	4.96183	4.86025	4.62708	5.27463	5.10304	5.18655	5.09379	5.32335	5.07868	5.01416	4.92369	5.11813	4.93197	4.83769	5.00292	4.76584	4.41826	5.02186	5.32331	5.29897	4.92412	5.09419	5.0124	4.94465	4.88314	5.15859	5.2306	5.33216	5.433	4.92829	4.97971	5.18137	5.08011	4.98959	4.87619
OG0004017	Lthed_scf0090.1_g027940.1	Qgl_scf0060.1_g081910.1	AT1G28210.2	AT1G28210.2	V	2.08476	2.10056	1.92207	2.28481	1.80559	1.92198	2.27187	1.65511	1.87626	2.21816	2.42858	2.65976	2.18995	1.84944	1.92858	1.6588	1.95132	1.77339	1.75554	1.71848	1.61624	1.68157	1.78031	1.78109	2.13859	2.29393	1.56507	1.68584	1.80748	1.71023	1.77845	1.92642	1.59604	1.69378	1.8978	1.96532	1.7401	1.70552	1.65987	1.9241	1.97653	1.68025	1.38781	1.74504
OG0004018	Lthed_scf0090.1_g096390.1	Qgl_scf0060.1_g083000.1	NA	AT4G07990.1	V	3.89159	3.94481	3.90243	3.95364	4.27491	4.49372	4.38367	4.48269	5.2058	5.55001	5.10704	4.49519	4.03011	4.16421	4.40698	4.33282	4.88856	4.4444	4.16972	4.68492	4.71102	5.48972	5.88411	5.30546	5.33009	4.59635	4.30292	4.62252	4.61253	4.36053	4.69048	4.73385	5.00514	5.11781	5.36546	5.5138	5.54259	5.05946	4.4556	4.38972	4.04119	4.21816	4.59619	4.83958
OG0004020	Lthed_scf0120.1_g075230.1	Qgl_scf0120.1_g067370.1	AT1G27450.1	AT1G27450.1	I	6.75825	6.71814	6.21468	6.73317	6.45823	6.11135	6.38463	6.5863	7.32487	6.87675	6.87636	6.07516	7.09946	7.33505	6.99327	6.35646	6.10452	6.01665	6.36088	6.2637	6.08133	6.36456	6.26768	6.83034	5.96902	6.35113	6.961	6.93864	6.76608	6.37948	6.43649	6.41583	6.37045	6.43046	6.26776	6.29387	6.22749	6.30143	5.89794	6.62	6.76888	6.30428	6.30365	6.2627
OG0004021	Lthed_scf0120.1_g074300.1	Qgl_scf0120.1_g066790.1	AT1G78290.3	AT1G78290.3	III	5.58324	5.50281	5.89872	5.36404	5.45005	5.28224	5.54588	5.78959	5.41227	5.40965	5.3137	4.7457	5.4589	5.49833	5.54056	5.45326	5.71627	5.72893	5.47758	5.51916	5.5458	5.6234	5.22096	5.62804	5.22075	5.04039	5.49309	5.35107	5.40033	5.4268	5.35153	5.35432	5.43919	6.06401	5.98939	6.26134	5.66648	5.27968	5.33012	5.42649	5.23221	5.48966	5.02415	5.43201
OG0004022	Lthed_scf0120.1_g073990.1	Qgl_scf0120.1_g066680.1	AT4G08960.1	AT4G08960.1	IV	6.43532	6.2782	6.40102	6.26189	6.67439	6.37349	6.54943	6.41728	6.78627	6.8309	6.97909	6.90072	6.23455	6.39055	6.38669	6.2746	6.63352	6.35478	6.22938	6.10039	6.2316	6.42915	6.37045	6.87514	6.4703	6.24547	5.83928	6.32918	6.2789	6.16257	6.32368	6.26329	6.00047	6.18054	6.58446	6.97284	6.84624	6.53456	6.17081	6.61457	6.14449	6.0034	5.94102	6.12655
OG0004025	Lthed_scf0090.1_g049960.1	Qgl_scf0060.1_g063660.1	AT5G61670.2	AT5G61670.2	II	4.69325	4.34715	5.1663	4.4376	4.97452	5.18441	4.4712	4.30132	4.07259	4.39262	4.43409	3.88326	4.31664	4.95192	5.08923	4.81442	5.52182	5.10765	4.43978	4.60851	4.1121	4.60587	5.02593	3.84443	4.59796	3.81198	4.63339	4.54245	4.32302	4.54925	4.54492	4.94114	4.9116	4.34595	4.00704	3.45461	3.59562	3.99367	4.51377	4.42245	4.62994	4.74488	4.91906	5.11935
OG0004026	Lthed_scf0090.1_g052630.1	Qgl_scf0060.1_g061590.1	AT5G61530.1	AT5G61530.1	IV	4.79501	4.89003	4.90244	4.08451	4.94337	4.71542	4.58145	4.4189	4.52472	4.46937	4.39452	4.62664	4.51943	5.0411	4.90319	4.75192	5.29708	4.93509	4.46442	4.60805	4.01591	4.4055	4.46179	4.08326	4.43782	4.69911	4.47853	4.56241	4.84355	5.04632	4.96374	5.15319	5.13437	4.83995	4.80237	4.95522	5.15192	4.93502	4.81983	4.62074	4.83366	4.61563	5.05268	5.24747
OG0004027	Lthed_scf0010.1_g016850.1	Qgl_scf0020.1_g017000.1	AT4G28020.1	AT4G28020.1	III	2.14189	2.23008	1.61532	2.18897	2.21804	2.02646	2.6749	2.92282	2.82006	2.88946	3.01799	2.62779	2.56309	2.34337	2.18207	2.34371	2.42311	1.9953	2.53325	2.45305	2.47166	2.87686	3.10012	2.38106	2.87281	2.60213	2.39344	2.46418	2.48694	2.16145	2.24676	2.21293	1.74116	2.52102	2.33864	2.51336	3.06513	3.07889	2.84442	2.35825	2.30594	2.6072	2.29386	2.15127
OG0004029	Lthed_scf0010.1_g012650.1	Qgl_scf0020.1_g013330.1	AT5G38240.3	AT5G38250.1	V	1.89989	3.08085	2.9509	3.2763	3.61629	3.2107	0.887806	1.12854	2.20314	0.891268	1.63604	1.03852	1.93744	3.03226	4.55039	3.77372	3.22925	1.84715	1.15745	2.2329	1.16995	1.06497	1.56446	1.08446	2.41772	1.41552	1.8583	2.99988	1.967	2.02668	1.50374	1.51303	1.04772	1.42174	2.2319	2.63505	1.5185	3.0018	1.72267	1.27187	1.83738	1.76317	3.24734	1.88763
OG0004030	Lthed_scf0010.1_g012360.1	Qgl_scf0020.1_g013190.1	AT2G18910.1	AT2G18910.1	III	5.66827	5.82611	5.7989	5.75055	5.48869	5.35117	5.49879	5.31612	5.51818	5.30741	4.65747	5.4141	5.83944	6.14615	5.51023	5.39974	5.31206	5.60984	5.45351	5.40925	5.67773	5.57447	5.42452	4.62441	5.16855	4.89188	5.51664	5.4352	5.58358	5.55711	5.79096	5.53817	5.99065	5.58224	5.60113	4.92643	4.82856	5.26304	5.93844	5.69827	5.91	5.83092	5.89558	5.78473
OG0004031	Lthed_scf0010.1_g012280.1	Qgl_scf0020.1_g013080.1	AT2G18950.1	AT2G18950.1	V	6.39956	6.15283	6.25646	6.00523	6.17959	5.96292	5.86257	5.50291	5.34379	5.071	5.11492	5.16782	6.08705	6.02109	6.19014	6.42381	6.48478	6.36336	6.0309	6.15887	6.01355	5.84012	5.35803	5.12169	5.63522	5.45718	6.12136	5.56052	5.48154	5.70417	5.80426	5.7505	5.52293	5.75718	5.37028	5.03011	4.86616	4.97139	5.4115	5.46092	5.21166	5.64904	5.92085	5.81999
OG0004032	Lthed_scf0010.1_g116300.1	Qgl_scf0020.1_g101200.1	AT2G19160.2	AT2G19160.2	IV	4.45451	4.25686	3.97601	4.22955	4.62326	4.52184	4.31475	4.8686	4.78124	4.77652	4.64511	4.5606	4.78021	4.35657	4.43096	4.41682	4.32824	4.39304	4.49003	4.60759	4.72696	4.6873	4.85793	5.04758	4.57648	4.9598	4.74673	4.83748	4.94922	4.87996	4.77358	4.8487	4.7807	4.70348	4.81416	5.06201	4.98222	4.82838	4.76135	4.80652	4.90776	4.91227	4.706	4.68325
OG0004033	Lthed_scf0010.1_g116090.1	Qgl_scf0020.1_g101260.1	NA	NA	V	1.96946	2.55278	2.12457	2.30842	2.49229	2.26234	0.467533	0.873997	0.328948	0	0.282259	0.267046	2.3697	2.50747	3.20317	2.94271	2.47273	2.7203	1.96764	1.87739	0.818467	0.520903	0.503505	0	1.13607	1.31386	2.08085	2.49985	2.44417	2.27919	1.77815	2.33943	2.14219	1.8375	0	0	0.231573	1.08115	1.97832	1.23536	3.06459	2.97034	4.57881	3.24431
OG0004035	Lthed_scf0010.1_g076680.1	Qgl_scf0020.1_g074420.1	AT5G57100.2	AT5G57100.1	I	4.09339	3.86288	4.02241	4.34144	4.53231	3.9213	4.38885	4.47845	4.92373	4.48987	3.64092	3.735	4.27729	4.52704	4.39714	4.45827	4.00627	3.87274	4.65329	4.43568	5.00238	4.76631	4.38565	4.54073	3.91607	4.1361	4.47807	4.64134	5.05166	4.69064	4.92562	4.9737	4.81337	5.03178	5.18392	5.31238	4.15478	4.22381	4.41206	4.04197	4.79128	4.96034	4.97983	4.73937
OG0004039	Lthed_scf0120.1_g082250.1	Qgl_scf0120.1_g072810.1	AT2G25760.1	AT2G25760.1	III	4.68541	4.38507	4.61483	4.28026	4.45958	4.6535	4.57843	4.59485	4.63583	4.76963	4.89466	4.549	4.5533	4.65709	4.59885	4.58199	4.70635	4.60758	4.5024	4.66627	4.64152	4.95533	4.98607	5.15477	4.76513	4.42684	4.50724	4.7108	4.66315	4.54814	4.8913	4.59021	4.74145	4.74283	4.66326	4.93946	5.29795	5.0539	4.65928	4.40535	4.64982	4.59689	4.73017	4.61825
OG0004040	Lthed_scf0120.1_g054610.1	Qgl_scf0120.1_g049100.1	AT5G25590.1	AT5G25590.1	I	4.49745	4.69478	4.45703	5.113	4.77085	4.83872	5.09779	4.41527	3.0225	3.49476	4.34735	5.37655	5.16443	4.48598	4.04441	4.72265	5.05635	4.79459	5.38301	5.1757	4.77148	4.16019	4.04391	2.23234	4.30222	5.26426	4.71746	4.49846	5.00189	5.03449	4.37132	4.35054	4.61551	3.06405	2.42108	0.808716	0.684816	2.16059	3.81949	4.72064	4.77461	3.88591	3.83652	3.98188
OG0004042	Lthed_scf0120.1_g052970.1	Qgl_scf0120.1_g047580.1	AT5G24890.1	AT5G24890.1	III	5.144	5.79301	6.47359	6.72529	6.42928	6.21587	5.66515	5.7663	6.17163	6.61239	6.09773	5.3914	4.81041	4.91617	5.95619	6.07433	6.08323	5.73807	5.35079	5.58471	5.01603	6.11168	7.05898	7.27841	5.62222	5.37672	5.10485	5.56978	5.04751	5.57008	5.64884	5.88044	5.51565	5.68836	6.11672	6.46867	6.35405	5.4491	5.3738	4.88421	5.19371	5.42401	6.07448	6.31419
OG0004046	Lthed_scf0120.1_g064560.1	Qgl_scf0120.1_g057250.1	AT4G32620.1	AT4G32620.1	IV	3.55085	3.59793	3.22577	3.57314	3.47431	3.59906	3.72652	4.10755	4.03741	4.20555	4.09519	3.77069	3.4454	3.54294	3.36415	3.67983	3.74469	3.71925	3.7508	3.70659	4.40325	4.31836	4.35397	4.67128	4.00385	3.95039	3.53724	3.87907	3.77029	3.71834	3.93122	3.74107	4.06036	3.9554	4.40393	4.72716	4.71431	4.60902	4.16198	3.88029	3.66313	3.84045	3.85394	3.60504
OG0004047	Lthed_scf0120.1_g064670.1	Qgl_scf0120.1_g057320.1	AT3G24350.1	AT3G24350.1	I	5.24324	4.77775	4.75693	5.00978	4.88952	4.67996	4.73628	5.34079	5.27234	4.87862	4.78153	5.44252	5.32524	5.17325	4.9319	4.85799	4.50803	4.87923	5.10555	5.17227	5.36771	5.24098	5.26517	5.59731	5.11872	5.39786	5.46927	5.47644	5.61	5.50064	5.56138	5.50972	5.45032	5.62134	5.86041	5.89434	5.8276	5.98894	5.61015	5.74428	5.72466	5.71426	5.16998	5.42649
OG0004052	Lthed_scf0010.1_g161420.1	Qgl_scf0020.1_g148920.1	AT4G31750.3	AT4G31750.3	III	6.71534	6.58063	6.29493	6.75607	6.429	6.4817	6.411	6.97527	7.09879	6.94475	6.8678	6.97098	6.49801	6.65085	6.64089	6.84586	6.72377	6.51815	6.74038	6.73165	7.06306	7.15171	7.10122	7.4525	6.97888	6.98631	6.75306	6.75005	6.85595	6.83116	6.88508	6.80392	6.64686	6.95035	7.29653	7.66677	7.93264	7.52838	6.85663	6.87194	6.61753	7.00776	6.80016	6.97481
OG0004055	Lthed_scf0010.1_g068580.1	Qgl_scf0020.1_g066360.1	AT5G13430.1	AT5G13430.1	IV	6.8064	6.93183	6.61123	6.53892	6.37791	6.57378	6.70091	7.19748	7.21103	6.92205	6.93961	6.92874	7.11435	6.6281	6.69324	6.47719	6.56024	6.72515	6.92241	6.71549	7.03352	7.02731	6.90225	7.24342	6.81228	7.2036	6.94186	6.29768	6.23436	6.30149	6.3453	6.38401	6.39459	6.42085	6.45941	6.70231	6.72988	6.45811	5.95515	6.70455	6.40958	6.08414	6.10166	6.16176
OG0004056	Lthed_scf0010.1_g067320.1	Qgl_scf0020.1_g065290.1	AT3G26744.4	AT3G26744.4	V	4.86976	5.02858	4.83546	5.31156	4.78512	4.75536	5.34288	5.78436	5.90568	5.75996	5.35584	5.01695	5.28706	4.88053	4.36447	4.69929	5.06898	4.87209	5.27496	5.18985	5.89052	5.96204	5.75511	6.44032	5.06439	4.82264	5.04281	4.70315	4.76758	4.96199	5.06878	5.01729	4.91979	5.28313	5.48796	5.42378	5.44963	5.18515	4.8842	4.82831	5.07598	4.82763	4.68822	5.08889
OG0004057	Lthed_scf0010.1_g065910.1	Qgl_scf0020.1_g064060.1	AT5G41070.1	AT5G41070.1	I	4.00608	4.21297	4.62328	4.6929	4.83761	5.04433	5.28481	4.34498	3.54367	3.55551	4.13535	4.70763	3.41709	3.26331	2.49031	4.73009	4.94054	5.07419	5.55901	5.41167	5.15303	4.49604	3.88263	2.68669	4.07463	4.19893	3.2962	3.22519	3.48824	4.19838	4.06009	4.22085	4.59176	3.39968	2.40982	1.57255	1.7071	1.84693	3.50634	3.14223	3.19918	3.28269	3.22529	3.46942
OG0004059	Lthed_scf0010.1_g090330.1	Qgl_scf0020.1_g086920.1	AT3G02680.1	AT3G02680.1	III	2.31941	2.56717	2.03352	2.78248	2.61675	2.37874	2.915	2.84739	2.61764	2.87797	2.87717	2.71863	2.85353	2.76545	2.84115	3.02701	3.00224	2.68552	3.22931	3.03981	3.18829	2.93045	3.02669	2.84679	3.01427	3.09409	2.70568	2.41151	2.58614	2.66695	2.74494	2.78147	2.65113	2.64635	2.38176	2.36743	2.11327	1.91687	2.91327	2.82586	2.56082	2.47384	2.69596	2.78276
OG0004060	Lthed_scf0090.1_g000580.1	Qgl_scf0060.1_g116820.1	AT1G33360.1	AT1G33360.1	II	4.20662	3.86598	3.72801	4.08989	3.86135	3.75662	3.86289	4.04187	3.88115	3.65477	3.64597	3.82281	4.27386	4.2732	3.93673	3.8926	3.70037	3.87653	3.92743	3.85657	3.70054	3.97609	3.64499	3.87007	3.49876	4.25936	4.39644	3.87603	4.04041	4.00966	3.98823	4.0337	3.82449	3.85612	4.03011	3.9206	3.94271	3.88738	3.79346	4.07333	4.26977	4.31601	3.92232	3.79854
OG0004061	Lthed_scf0090.1_g000620.1	Qgl_scf0060.1_g116790.1	AT4G10250.1	AT4G10250.1	III	7.09075	2.05081	8.49321	0	3.34146	6.26049	0	0.587904	2.76359	3.33246	3.83232	2.78045	0.338131	3.31535	4.68958	0.772275	7.34891	7.25399	0.0744275	0.540169	0.19965	3.4158	4.34363	5.50307	3.3408	1.09259	0.206047	0.753694	0	4.74173	0.0821277	0.0852435	0.938842	0.442545	6.46783	7.78742	9.08034	9.60286	4.45968	0.281692	0.311112	0.16365	0.666825	0
OG0004062	Lthed_scf0090.1_g000650.1	Qgl_scf0060.1_g116750.1	AT1G33330.3	AT1G33330.3	III	2.91202	3.00678	4.12304	3.31305	3.56723	3.58902	3.38381	2.77723	3.56061	4.01168	3.82432	2.99536	2.44995	2.82577	3.41352	3.05708	3.94679	3.61341	2.62355	3.02153	2.79924	2.90328	3.33691	2.3661	3.32399	2.62348	2.58998	2.06548	1.86209	2.61792	2.83927	2.33498	2.76013	2.63594	1.86662	2.14896	2.40012	2.53586	2.54378	2.3146	2.23269	1.77287	2.25102	2.95588
OG0004063	Lthed_scf0090.1_g001010.1	Qgl_scf0060.1_g116510.1	AT1G33470.2	AT1G33470.2	I	5.44044	5.27132	4.86269	5.11305	5.55411	4.92569	5.08064	5.21769	5.12217	5.16744	4.86511	4.9021	5.41791	5.34767	5.35295	4.9131	4.29576	4.88083	5.27906	5.57184	5.75362	5.30943	5.58186	4.95137	5.52061	4.89548	5.17598	4.94313	5.23687	5.46122	5.77632	5.59907	5.4599	4.84808	4.4478	4.37638	4.09687	4.14806	4.24084	5.11805	5.29282	4.82055	4.65133	4.93652
OG0004064	Lthed_scf0090.1_g001930.1	Qgl_scf0060.1_g115140.1	AT4G10080.1	AT4G10080.1	III	6.8188	6.68224	6.60994	6.79708	6.64682	6.69945	6.73646	6.17636	6.00537	6.25977	6.40546	6.30964	6.15804	6.69769	6.37274	6.50275	6.6767	6.6395	6.43571	6.39739	6.31379	6.21558	6.39034	6.37714	6.19229	5.91695	6.40571	6.33998	6.4241	6.6846	6.61669	6.60686	6.63331	6.10014	5.81632	5.89076	5.93287	5.45206	5.3441	5.88926	6.4669	6.19705	6.39911	6.6799
OG0004065	Lthed_scf0090.1_g005520.1	Qgl_scf0060.1_g110550.1	AT1G71691.2	AT1G71691.2	I	4.33939	4.8119	5.13504	5.4565	5.43616	5.79706	6.08016	4.53962	4.21419	4.40862	5.47547	6.17287	3.61066	3.77868	3.1236	5.2263	5.22466	5.55182	6.18891	5.85194	5.3706	4.64833	3.70273	3.06751	5.29363	5.53706	3.24375	3.59501	4.19854	5.26286	4.77965	4.68683	5.28223	3.66793	3.66561	2.3262	1.73336	3.02161	4.26491	4.65259	3.62689	3.20058	3.34114	3.26687
OG0004066	Lthed_scf0050.1_g121500.1	Qgl_scf0040.1_g151400.1	AT5G03560.4	AT5G03560.4	III	2.09194	2.51887	2.14753	1.84442	2.10125	2.57627	2.2244	1.76247	0.579756	1.23469	1.90394	2.15622	1.9174	1.98803	1.90317	2.14183	2.95588	2.43517	2.0334	1.77831	1.93293	1.47642	1.39435	1.20621	2.22064	2.56823	1.64153	2.40263	2.20201	2.32234	2.34811	2.33028	2.79569	2.28984	1.57281	1.10602	0.918083	1.16511	1.51214	2.16617	1.66736	2.34129	2.19517	2.00841
OG0004067	Lthed_scf0010.1_g045020.1	Qgl_scf0020.1_g043720.1	AT5G15070.5	AT5G15070.5	II	3.17814	3.16018	2.73031	3.22008	2.87144	2.88395	3.0916	3.92674	4.02786	3.87652	3.4236	3.17407	3.30824	3.13146	2.80351	2.94077	2.91451	3.25047	3.44494	3.43043	4.21232	3.94844	4.6145	4.52424	3.76847	3.92508	3.44271	3.033	2.92207	2.99825	2.97366	3.02275	3.02522	3.59603	3.60997	3.81035	4.23443	3.79092	3.76332	3.05728	3.39321	3.53877	2.47446	2.74275
OG0004069	Lthed_scf0010.1_g047070.1	Qgl_scf0020.1_g044990.1	AT3G28480.1	AT3G28480.1	III	4.90529	4.6279	4.98028	4.82755	4.91775	4.84922	5.00371	4.45147	3.8931	3.93447	3.97185	4.77289	5.1124	5.56942	4.93818	4.55086	4.51339	4.87412	4.56556	4.73153	4.27521	4.32525	3.58716	3.96166	3.97889	4.89603	4.92834	4.88736	5.04598	5.13701	4.83577	5.16387	5.19803	4.78704	4.19873	3.63272	3.64152	3.70897	4.42297	4.77618	5.35922	5.23672	5.24553	5.29617
OG0004070	Lthed_scf0010.1_g047660.1	Qgl_scf0020.1_g045840.1	AT3G28345.1	AT3G28345.1	I	2.98372	3.06216	2.39865	1.93741	2.76142	2.57749	2.85182	0.735745	0.490145	0.249261	0.386089	1.3859	3.88422	4.62565	4.93516	2.20073	1.72237	2.19091	1.49815	1.35241	0.730391	0.532642	0.269342	0.276839	0.258507	1.58851	4.58286	2.00169	2.9179	1.67663	2.42804	2.38251	2.82015	1.46469	1.10247	0.528337	0.571958	1.11744	1.6971	2.48477	2.66002	1.8679	2.97007	2.49441
OG0004071	Lthed_scf0010.1_g052880.1	Qgl_scf0020.1_g051900.1	AT5G14780.1	AT5G14780.1	III	6.14799	5.73797	5.81423	5.82902	5.79776	5.82597	6.02997	8.05134	7.77159	6.64664	5.8219	5.82913	5.35102	6.52949	6.26822	5.94036	6.30965	5.75337	5.82885	6.39019	6.78883	6.98884	7.02665	6.89574	6.50478	6.50559	6.22796	6.69194	6.01888	6.5034	6.96444	6.23831	6.63606	6.58798	6.82625	7.07353	7.77983	7.8055	7.13459	7.39605	6.13178	6.47549	6.6219	6.92236
OG0004073	Lthed_scf0010.1_g058840.1	Qgl_scf0020.1_g058730.1	AT4G24770.2	AT4G24770.2	II	4.66793	4.96545	4.52181	4.96284	4.50491	4.57202	4.88239	5.04609	5.91557	5.96011	5.76104	5.52713	5.0539	4.71702	4.23483	4.32184	4.88471	4.48754	5.1405	5.15185	5.64283	5.91938	6.16582	6.05501	5.75446	5.44004	4.79384	5.09785	4.87408	4.93182	5.10269	5.19593	5.16215	5.63496	5.68114	5.63101	5.58575	5.57266	5.59149	5.51035	5.34855	5.26505	4.83928	4.99033
OG0004074	Lthed_scf0010.1_g060830.1	Qgl_scf0020.1_g059900.1	AT5G40760.2	AT5G40760.2	V	6.26537	5.76051	5.21243	5.61683	5.64389	5.60287	6.17324	6.56262	6.8163	6.53088	6.1794	5.74592	6.13241	6.28095	5.85261	5.7749	5.36407	5.02988	5.86801	6.08352	6.12193	6.83335	6.34768	6.70191	6.06052	6.07971	6.44337	5.7568	5.9859	6.0579	5.95529	6.24465	6.33569	6.78453	7.06627	6.9353	7.13949	6.42456	6.10396	5.95849	6.39416	6.16787	6.39256	6.05046
OG0004075	Lthed_scf0010.1_g061170.1	Qgl_scf0020.1_g060310.1	AT5G14285.1	AT5G14285.1	I	4.88032	4.8919	5.26004	4.59973	5.09138	5.31731	5.46144	5.2357	5.01393	4.00029	3.84899	4.61237	5.31371	5.1197	4.98567	4.57225	4.51962	5.00762	5.07763	5.19502	5.17888	4.61572	4.2537	4.05104	3.5845	4.36544	5.43184	5.07957	5.13754	4.75912	5.33757	4.9586	5.29053	5.17935	3.18487	3.14071	2.88258	2.84501	3.33947	4.58454	5.24544	5.26585	4.80518	5.22792
OG0004076	Lthed_scf0010.1_g061310.1	Qgl_scf0020.1_g060410.1	AT5G40810.1	AT5G40810.1	IV	6.77372	6.65274	6.63326	6.47346	6.53532	6.67136	6.84613	6.60267	6.66588	6.71456	6.74291	7.12123	7.01257	6.92483	6.68245	6.5381	6.70875	6.79442	6.75436	6.77932	6.51316	6.63434	6.77775	6.66756	6.82242	7.28809	6.92447	7.03171	7.01857	7.02693	7.08708	7.10904	7.14717	7.01251	7.09979	7.17067	7.46881	7.35272	6.79731	7.41255	7.14578	6.93051	6.82315	7.0117
OG0004077	Lthed_scf0010.1_g062840.1	Qgl_scf0020.1_g061960.1	AT3G01860.2	AT3G01860.2	V	6.13684	6.27775	6.10638	6.37672	6.37498	6.4673	6.17681	6.69869	6.85029	6.97365	6.56432	5.34182	5.78405	6.13368	6.70615	6.49246	6.38449	6.23966	6.06727	6.50888	6.69533	6.91778	6.98422	7.44986	6.48725	5.71963	6.28094	5.75859	5.58419	5.62998	5.96292	5.95304	6.36335	6.72223	6.85203	6.70345	7.33021	7.04471	6.67107	5.43661	5.48355	6.04243	6.2399	6.48638
OG0004078	Lthed_scf0010.1_g062850.1	Qgl_scf0020.1_g061990.1	AT5G14180.1	AT5G14180.1	I	0.558683	0	1.1101	1.0197	1.18439	1.53213	1.14851	0.0772797	0	0	0	1.18194	1.05915	1.41701	1.15917	1.17575	1.31359	1.07313	0.902075	0.860842	0.207426	0.0296933	0.0889379	0.106185	0.263974	1.86156	0.999721	0.838674	1.07822	1.04277	0.499824	0.319229	0.594661	0.0863347	0.18816	0.451386	0.203645	0.71573	0.387274	1.19789	0.664773	0.724417	0.700161	0.720054
OG0004079	Lthed_scf0010.1_g062900.1	Qgl_scf0020.1_g062090.1	AT3G27170.1	AT3G27170.1	IV	0.543488	0.37885	0.236119	0.0962521	0.400044	0.353455	0.286744	0.756248	0.73086	1.0235	1.14856	0.465493	0.310616	0.0834842	0.0832054	0.0582612	0.233075	0.153581	0.1945	0.210958	0.750014	0.818157	0.906289	0.810502	0.570959	0.656778	0.120619	0.357274	0.358851	0.214405	0.103303	0.119087	0.262488	0.591921	0.635045	0.826477	0.976425	0.875934	1.4161	0.690245	0.352153	0.419422	0.357806	0.281621
OG0004080	Lthed_scf0010.1_g098250.1	Qgl_scf0020.1_g093910.1	AT3G02280.3	AT3G02280.3	III	2.9932	2.86036	3.13649	3.06455	3.29442	3.06932	2.88586	3.41521	3.22905	3.43548	3.35293	3.39543	2.76786	3.04956	3.23461	3.02003	3.12351	3.20713	2.9935	2.90841	3.30245	3.2902	3.10341	3.38368	3.32442	3.12177	2.6074	3.04629	3.0045	3.19299	2.97644	3.21545	3.06862	3.09082	3.16629	3.07661	3.08034	2.95849	3.34305	3.31028	2.88205	2.96116	2.75928	3.1067
OG0004081	Lthed_scf0010.1_g096910.1	Qgl_scf0020.1_g093080.1	AT5G15270.3	AT5G15270.3	III	4.15535	4.03185	4.00753	4.11296	3.93352	4.02003	4.20415	4.0868	4.36673	4.56133	4.50049	4.42234	3.94656	4.0496	3.88234	4.04501	4.14687	4.05306	4.30124	4.3382	4.09853	4.54875	4.60877	4.07693	4.51852	4.26883	4.04557	4.16707	4.21412	4.13564	3.95319	4.15079	4.01413	4.22033	4.23473	4.35237	3.95854	4.16632	4.07928	4.04442	3.9283	4.13878	3.95772	3.92727
OG0004084	Lthed_scf0010.1_g079320.1	Qgl_scf0020.1_g076730.1	AT5G11390.1	AT5G11390.1	III	2.81135	2.96654	3.23403	2.96807	2.71474	2.77861	3.17939	3.10059	3.07247	3.07888	2.89133	2.82442	2.85758	3.3068	3.08118	3.22906	3.24535	3.17522	3.09796	3.24167	2.90055	2.8517	3.21686	3.34109	2.953	2.94608	3.15911	3.33968	3.27879	3.24491	3.42255	3.33034	3.43324	3.235	3.08282	3.47007	3.5703	3.5173	3.35702	3.00822	3.43389	3.42602	3.52265	3.32003
OG0004085	Lthed_scf0010.1_g075390.1	Qgl_scf0020.1_g073220.1	AT5G15790.4	AT5G15790.4	V	4.55126	4.41847	4.79153	4.30615	4.51559	4.44164	4.60904	4.37697	4.7228	4.78944	4.69228	3.6797	4.46475	4.87702	5.13792	4.80732	4.52357	4.63564	4.15627	4.47903	4.68621	4.94716	5.34719	5.35384	4.53549	3.83511	4.60482	4.50391	4.79155	4.75576	4.67208	4.62806	4.55799	4.47182	4.68715	5.29542	5.2495	5.11561	4.64869	4.04684	4.36536	4.52204	4.79853	4.58373
OG0004087	Lthed_scf0110.1_g011360.1	Qgl_scf0110.1_g074680.1	AT2G41490.1	AT2G41490.1	III	4.82273	4.62277	4.84532	4.33806	4.70885	4.50967	5.03958	4.48572	4.62328	4.77523	4.61805	4.65947	5.02936	4.45417	4.65375	4.52672	4.48399	5.02238	4.73524	4.70805	3.7704	4.4399	4.06846	3.90895	4.44875	4.50991	4.35436	4.50036	4.63358	4.61871	4.73576	4.90826	4.94202	4.64833	4.52359	4.63136	4.99881	4.43483	4.18508	4.52036	4.80342	4.14903	4.60725	4.4496
OG0004090	Lthed_scf0010.1_g072040.1	Qgl_scf0020.1_g069050.1	AT1G13740.1	AT1G13740.1	III	5.52773	5.39042	6.02685	4.26679	5.2283	5.69799	4.92161	4.36851	4.88632	3.83405	4.11355	3.44459	5.27104	5.2044	4.98124	4.94283	5.83906	5.32224	4.53461	5.34499	4.89568	4.58925	4.87669	4.91168	3.92643	3.00395	5.51476	5.34694	5.2982	4.56851	4.94367	5.0439	5.40877	5.10811	5.71731	4.8018	4.94546	6.55128	4.29165	3.85232	5.53799	5.15369	4.82284	4.57894
OG0004091	Lthed_scf0010.1_g071910.1	Qgl_scf0020.1_g069000.1	AT3G02110.1	AT3G02110.1	IV	3.12553	3.32915	2.57969	3.14233	2.85302	2.6388	3.84083	3.69056	4.03479	3.38162	3.19118	4.61227	3.28458	3.03898	2.73322	2.7631	2.49467	2.99646	4.17859	4.27149	3.95729	3.78396	3.86308	3.44523	3.46287	4.43091	3.06434	2.18763	3.24228	3.366	3.36527	3.61511	3.50037	3.39201	4.08106	3.25714	2.65108	1.74552	2.82303	2.75838	2.92782	2.67577	3.48615	3.26139
OG0004092	Lthed_scf0010.1_g127400.1	Qgl_scf0020.1_g118250.1	AT5G15470.1	AT5G15470.1	IV	3.29513	3.55705	3.01048	3.5264	3.07162	3.18877	3.26863	4.12935	4.06486	3.65466	3.6133	3.76154	3.88	3.3808	3.14468	3.25084	2.98747	3.28058	3.78492	3.61877	3.95372	3.70617	3.37683	4.29371	3.82798	4.20178	3.55535	4.17752	3.86545	3.99296	3.83019	3.6422	3.60037	3.97892	4.7021	4.67817	4.50801	4.66974	4.28926	4.58263	4.02911	4.03844	3.50357	3.54015
OG0004093	Lthed_scf0010.1_g127540.1	Qgl_scf0020.1_g118440.1	AT5G39360.1	AT5G39360.1	III	4.60417	4.70124	4.57684	4.80114	4.36267	4.70979	4.42845	5.28877	5.21256	5.09707	5.49248	4.92843	4.6381	4.77877	4.57947	4.81172	4.59122	4.79097	4.87009	4.73895	5.35976	5.37271	5.44566	5.51428	5.47689	4.96695	4.86208	4.88187	4.95368	4.69606	4.82978	4.78029	4.74897	4.9524	4.63929	4.80295	5.27923	5.15451	4.69785	4.93489	4.90316	4.86697	4.40011	4.95989
OG0004094	Lthed_scf0090.1_g010120.1	Qgl_scf0060.1_g107830.1	AT5G07670.1	AT5G07670.1	II	2.91945	2.82315	3.05272	3.283	2.80052	2.74767	3.2177	3.01307	2.68776	2.83666	3.12575	3.79964	3.04045	2.55907	2.76717	2.77844	2.58864	2.5546	3.02634	3.14649	2.96883	2.3827	2.93545	3.29685	3.35438	3.44315	2.74924	3.62044	3.34281	2.89335	3.32087	3.39401	3.43056	3.7151	3.24341	3.9997	4.62846	4.00868	3.76019	3.62398	3.24205	3.36093	3.32513	3.66852
OG0004095	Lthed_scf0090.1_g010750.1	Qgl_scf0060.1_g106930.1	AT5G51410.5	AT5G51410.5	III	3.01185	2.77507	2.86155	2.73341	3.0544	2.99572	2.64062	2.6434	3.00858	2.70233	2.77214	3.07397	3.15168	3.11428	2.82102	2.89149	2.77804	2.94577	2.67553	2.70184	2.98306	2.9665	2.74006	2.68115	2.76185	2.7114	2.73317	2.54638	2.67991	2.56025	2.82283	2.89186	2.37349	2.47998	2.32396	2.33275	2.54418	2.30845	1.86841	2.55874	2.37106	2.0962	2.76993	2.88808
OG0004098	Lthed_scf0090.1_g026470.1	Qgl_scf0060.1_g086700.1	AT1G55630.1	AT1G55630.1	V	2.33294	2.31707	2.21916	2.26424	1.94297	2.30424	1.83456	2.19965	2.57756	2.28617	2.3437	2.57478	2.14804	1.85905	1.86502	2.41911	2.0292	1.98304	2.33252	2.39875	3.04969	2.40125	2.33345	2.57802	2.44972	2.75378	2.13343	2.26469	2.08455	2.37446	2.21591	2.28471	2.30451	2.43098	2.32675	1.77888	2.16216	2.45819	2.62802	2.44334	1.96751	2.0612	2.07422	2.16056
OG0004105	Lthed_scf0100.1_g064340.1	Qgl_scf0100.1_g048960.1	AT5G09840.1	AT5G09840.1	III	1.62714	1.13785	1.8195	1.98465	1.6891	1.57502	1.85898	2.20196	1.90961	1.47688	2.12984	3.00397	1.64502	1.3254	0.998222	1.30366	1.27742	1.50301	1.95028	1.9682	2.49433	2.03955	1.88657	1.60144	2.11355	3.15166	1.80009	1.98079	1.63395	2.00565	1.71329	1.71705	1.88593	1.86677	1.46698	1.64578	1.51129	2.13395	2.87649	2.59157	1.83771	1.58909	1.60675	1.47365
OG0004107	Lthed_scf0100.1_g065610.1	Qgl_scf0100.1_g048140.1	AT5G09900.2	AT5G09900.2	V	6.23955	6.36295	6.04678	6.17975	5.8978	5.83166	6.07969	6.12982	6.24475	6.06996	6.2285	6.45419	6.48395	6.31324	5.91415	6.00059	5.84642	5.95739	6.3856	6.25739	6.45327	6.33422	6.09806	6.77449	6.12601	6.54107	6.31886	6.42323	6.52377	6.40631	6.50455	6.26422	6.39305	6.29697	6.45292	6.4934	6.47508	6.5684	6.51066	6.63623	6.62888	6.44735	6.37652	6.10934
OG0004108	Lthed_scf0100.1_g066250.1	Qgl_scf0100.1_g047700.1	AT4G12040.2	AT4G12040.2	III	4.97198	5.18478	4.97676	5.0813	4.96429	4.86735	4.89619	5.13164	5.34858	5.1485	4.95652	5.16807	5.32328	4.98301	5.01456	4.85301	4.70812	4.75707	4.93133	5.29754	5.33535	5.4068	5.28203	5.49059	4.67389	5.15683	5.51566	5.45709	5.68247	5.74336	5.39418	5.38111	5.34668	5.71581	5.84238	5.86653	5.96536	5.76256	5.6615	5.51629	5.50455	5.71354	5.52588	5.50562
OG0004110	Lthed_scf0100.1_g067490.1	Qgl_scf0100.1_g046340.1	AT2G21960.1	AT2G21960.1	II	1.05473	0.582394	1.55941	0.863588	1.33234	0.20992	0.273172	0.611709	0.806268	1.13028	1.01572	1.41718	1.56943	1.09898	0.272433	0.324171	0.737099	0.69295	0.626337	0.816571	0.985085	0.473616	0.987833	0.543457	1.10451	1.17241	1.37322	1.16743	1.28564	0.830756	0.912012	1.19569	0.903955	1.4751	1.54706	1.23428	0.537574	0.817596	1.74452	1.66481	2.16766	1.9317	1.25242	1.07885
OG0004111	Lthed_scf0100.1_g098920.1	Qgl_scf0100.1_g005470.1	AT5G10080.1	AT5G10080.1	I	3.43802	3.93798	3.62045	3.52418	3.61237	3.36694	3.87835	3.25184	2.62752	3.07639	3.68917	4.21618	4.82556	4.68682	4.82843	3.68896	3.94386	3.08988	3.64001	3.83468	3.48564	3.18996	3.8279	2.3928	3.68055	4.17929	4.65425	4.56445	4.6079	3.48275	3.69866	3.38229	3.12053	2.19177	1.12582	1.32123	3.26917	3.22786	3.90295	4.33171	4.2214	3.46581	3.33653	2.733
OG0004112	Lthed_scf0100.1_g096790.1	Qgl_scf0100.1_g007640.1	AT4G39900.1	AT4G39900.1	I	6.63609	6.01147	5.90953	7.00298	6.04839	5.44124	6.03301	5.35246	4.46813	4.50911	5.73103	5.98442	6.7594	7.13074	6.55854	5.80308	4.65332	5.50865	6.02076	5.68965	5.63047	5.54833	5.26917	4.60317	5.06349	5.7827	6.66402	7.41529	7.22853	6.04759	6.18095	6.0099	5.68945	5.89488	4.44752	4.16095	4.66376	6.09545	6.09828	6.45648	7.21644	6.92454	5.97094	6.54865
OG0004113	Lthed_scf0100.1_g096350.1	Qgl_scf0100.1_g008040.1	AT4G39910.1	AT4G39910.1	III	4.90594	4.86874	4.83255	5.33061	4.98012	4.94338	4.99327	5.47536	5.67861	5.51463	5.48377	5.34221	4.8554	5.05484	5.0901	5.04775	5.05613	4.95469	5.0834	5.18943	5.53214	5.56527	5.78657	5.82906	5.46459	5.27637	4.96593	4.93907	4.96525	4.96902	5.07658	5.0636	5.17681	5.43067	5.46724	5.6978	5.98533	5.93525	5.7256	5.02098	4.78599	5.09107	5.20886	5.10838
OG0004117	Lthed_scf0110.1_g075000.1	Qgl_scf0110.1_g020720.1	AT4G28820.2	AT4G28820.1	III	1.64604	0	1.29277	0.955095	0.82715	0	0.76804	2.10974	1.932	2.39526	2.23326	1.70206	1.65412	0.764732	0.802434	0.839614	0.721886	0.404259	1.14041	1.24042	1.27725	1.37996	2.00718	1.25276	1.04849	2.07741	1.40118	1.12842	1.56773	1.29944	0.917841	1.14463	0.830582	2.23522	1.80793	1.77625	2.05844	2.34442	1.8283	1.70674	1.07092	2.00187	0.490759	1.28667
OG0004118	Lthed_scf0040.1_g070420.1	Qgl_scf0050.1_g065080.1	AT1G04980.1	AT1G04980.1	V	7.32935	6.47171	7.30744	6.48292	6.54329	6.90405	6.90998	6.50202	6.29872	5.9719	6.05536	7.45876	7.22529	6.7763	6.74996	6.42412	6.76996	7.48227	6.53604	6.56374	6.23369	6.26722	5.80764	5.58308	6.17902	7.40556	6.82682	6.74626	6.66731	7.06522	6.63153	6.86638	6.83329	6.46954	6.03083	5.85072	6.28602	5.92259	6.04106	6.84766	6.80777	6.28224	6.52091	6.34181
OG0004120	Lthed_scf0040.1_g064810.1	Qgl_scf0050.1_g069310.1	AT1G11790.1	AT1G11790.1	V	3.72623	3.32102	2.15862	2.98439	2.41545	2.32497	3.13492	3.16812	2.82115	2.59101	2.85433	3.27372	3.60743	3.38347	3.17129	3.37509	2.51057	2.87627	3.34593	3.04816	3.47268	3.35525	2.56175	3.03035	3.17503	3.60874	4.14054	4.13923	3.76404	3.21251	2.97894	3.0594	3.23645	3.60987	3.63524	3.47076	4.05813	4.51634	3.81289	3.66504	3.21698	4.53148	3.12116	2.9604
OG0004122	Lthed_scf0020.1_g175410.1	Qgl_scf0060.1_g110030.1	AT2G46150.1	AT2G46150.1	V	0	0	0	0.847326	0	0	0	0	0	0	0	0	0	0.186374	0.167368	0	0.136917	0.418753	0.128559	0	0	0	0	0	0.210562	0.389222	0	0.880229	0.784534	0.578803	0.489564	0.0820541	0.54788	0	0.262397	0.958186	0.614431	1.26826	0.244949	0.713634	0.907817	1.33705	0.255261	0.550828
OG0004123	Lthed_scf0040.1_g062350.1	Qgl_scf0050.1_g072090.1	AT3G21865.1	AT3G21865.1	I	5.86519	5.8435	5.59678	5.9622	5.75877	5.71759	5.68042	5.9072	5.83046	5.59403	5.48537	5.88173	5.92873	6.08403	6.09599	5.84912	5.85454	5.88336	5.77534	5.74593	5.74494	5.92241	5.86395	6.24498	5.58788	5.78186	5.89393	5.98167	5.90388	5.81522	5.97385	5.82137	5.76509	5.85203	5.83516	6.12491	6.30948	6.05468	5.72007	5.89661	5.96725	5.92991	5.69286	5.75475
OG0004124	Lthed_scf0040.1_g062310.1	Qgl_scf0050.1_g072110.1	AT5G35730.1	AT5G35730.1	II	4.29275	4.24104	4.17522	4.11608	3.749	4.1102	4.38833	4.45869	3.96654	3.92594	3.68286	4.1715	4.55329	4.1197	3.73326	4.13818	3.84502	4.38288	4.32436	4.36167	4.07531	3.79945	3.48877	4.03273	3.6089	4.34604	4.54592	4.098	4.33452	4.08594	3.99066	3.95507	4.18101	3.88956	3.79221	3.77362	3.87086	3.74071	3.81171	4.23444	4.54156	3.94747	4.04749	3.92328
OG0004125	Lthed_scf0040.1_g060300.1	Qgl_scf0050.1_g074790.1	AT4G27310.1	AT4G27310.1	I	5.18619	5.60367	7.07431	3.88814	6.10891	6.22809	2.36679	2.74618	3.50956	3.34592	3.77923	3.13743	4.82575	5.49983	5.90687	5.15437	5.70374	5.60627	2.87179	2.19002	3.02839	2.21137	1.93804	3.15245	3.99562	2.87001	4.5325	4.80201	3.26345	3.3721	2.89834	2.98223	2.85081	2.97742	4.80003	4.47013	3.19586	5.94163	2.66362	3.70966	3.34583	4.40789	3.20432	4.33305
OG0004129	Lthed_scf0080.1_g105410.1	Qgl_scf0070.1_g006640.1	AT3G43220.1	AT3G43220.1	III	4.18619	4.36398	4.07899	4.28513	3.54833	3.60408	4.01419	4.70583	4.36649	4.43002	4.41929	4.09126	4.49064	4.06789	4.00082	4.30111	4.20685	4.06675	4.4083	4.24235	4.71779	4.63883	4.31402	4.88521	4.56219	4.35982	4.42005	4.51567	4.4931	4.32399	4.2825	4.00239	4.05096	4.30028	4.68337	4.84547	4.95943	4.98083	4.76164	4.79693	4.49015	4.66795	4.17454	3.97071
OG0004130	Lthed_scf0080.1_g105270.1	Qgl_scf0070.1_g006730.1	AT1G79940.3	AT1G79940.3	V	5.57622	5.39535	5.3749	5.46206	5.4387	5.34789	5.71429	6.02315	5.97512	5.73478	5.80408	5.80462	5.78516	5.64216	5.27844	5.3467	5.3747	5.22767	5.72783	5.59459	6.00313	5.90833	5.82515	6.16855	5.72115	5.95819	5.64707	6.00818	5.94423	5.75807	5.97823	5.8967	5.71433	6.05844	6.05103	6.28568	6.39572	6.14539	5.92046	6.16599	6.04843	5.90525	5.61921	5.71681
OG0004133	Lthed_scf0010.1_g083060.1	Qgl_scf0020.1_g080010.1	AT4G26060.1	AT4G26060.1	IV	4.68903	3.3785	4.83869	3.74869	3.44791	4.20861	4.05258	4.61547	4.8683	4.36946	4.15504	3.55612	4.25155	4.22611	4.48594	4.40368	3.79042	4.70996	4.17666	4.58429	4.77096	4.81381	4.97519	5.40953	4.33421	4.56631	4.8537	4.35712	4.62559	4.3856	4.19088	4.16362	4.26378	4.52174	5.07894	5.29998	5.30385	5.15682	4.39761	3.53725	4.49073	4.73236	4.34074	4.2882
OG0004135	Lthed_scf0010.1_g081750.1	Qgl_scf0020.1_g079280.1	AT2G19490.1	AT2G19490.1	V	3.05212	2.80572	2.83466	3.22504	3.46489	3.24193	3.45153	3.5328	3.27662	3.88935	4.04265	3.94625	3.09055	3.17958	3.04644	3.25435	3.3696	2.99535	3.48067	3.58202	3.7878	3.65772	3.77177	3.1083	3.89799	3.67928	3.03506	3.4214	3.55626	3.2377	3.64101	3.53439	3.57854	3.72792	3.65796	3.64904	3.74808	4.1167	4.26574	3.91507	3.38304	3.40173	3.53896	3.47873
OG0004137	Lthed_scf0010.1_g081300.1	Qgl_scf0020.1_g078710.1	AT5G56980.1	AT5G56980.1	I	5.87999	6.83553	6.47959	6.9779	6.58972	6.56205	5.22595	4.92241	5.95585	5.37851	5.68703	5.52427	6.31831	5.14025	6.42636	7.0399	6.33807	6.6983	5.84667	5.77894	4.47691	5.03562	5.33386	5.74958	5.57336	5.08542	5.61902	4.76875	5.26685	5.69922	5.33122	5.25694	4.78413	4.3798	7.04502	7.74626	5.89027	6.64246	4.32143	4.01045	5.05005	5.1747	5.39161	5.31082
OG0004140	Lthed_scf0010.1_g038120.1	Qgl_scf0020.1_g036470.1	AT5G19600.1	AT5G19600.1	I	1.38437	3.11925	2.98316	1.7542	1.09555	0.559278	0.619481	3.3153	5.38594	2.95011	0.490285	2.14012	2.35777	3.03967	3.43857	0.879417	1.30657	0.9369	0.919762	0.733146	2.281	2.04179	1.63155	2.26178	1.00707	5.36579	0.98241	2.00584	3.45565	1.99524	4.20677	3.98588	3.6558	1.92686	3.00458	1.86989	1.43672	0.658832	1.03155	3.12046	4.11427	3.61317	3.71758	4.58298
OG0004141	Lthed_scf0010.1_g037840.1	Qgl_scf0020.1_g036250.1	AT4G13350.2	AT4G13350.2	IV	5.52539	5.61446	5.42175	5.88418	5.50956	5.507	5.44647	5.92659	6.0996	6.04408	5.90274	5.29365	5.72633	5.76879	5.82616	5.82275	5.60201	5.47539	5.83165	5.67917	6.136	6.08205	6.25506	6.2997	6.06501	5.50773	5.67998	6.14253	6.09072	6.1857	6.27924	6.2959	6.27298	6.21604	6.50465	6.78237	6.68127	6.40081	5.94548	6.06316	6.07762	6.04903	6.12396	6.19123
OG0004142	Lthed_scf0010.1_g036970.1	Qgl_scf0020.1_g035500.1	AT1G08510.1	AT1G08510.1	I	7.34322	7.1962	7.25764	7.13278	7.18281	7.13584	6.48476	6.17479	6.15748	6.11227	5.92852	6.15326	6.59424	6.4068	6.74007	7.50024	7.51606	7.35244	6.82285	6.79453	5.93849	5.99949	5.97909	6.26268	6.12715	5.89518	6.8221	6.13354	6.57329	6.66064	6.80633	6.62718	6.70223	6.23383	6.23527	6.10034	5.79299	5.60618	5.30651	5.80277	6.73353	6.64917	6.72622	6.63399
OG0004143	Lthed_scf0010.1_g035010.1	Qgl_scf0020.1_g033620.1	AT5G20060.4	AT5G20060.4	II	7.1416	6.91976	6.97721	7.03716	7.00369	7.08501	7.24155	6.92939	6.76933	6.71993	6.99822	6.86853	7.36575	7.2018	7.07659	7.10883	7.06105	7.11093	7.27551	6.98322	6.81431	6.74595	6.67219	6.75558	6.6574	7.04896	6.99027	6.81712	6.96903	6.79817	6.94745	6.89392	6.84773	6.87527	6.86841	6.9441	6.93357	6.82696	6.74221	7.0085	6.88195	6.70506	6.53193	6.70962
OG0004144	Lthed_scf0010.1_g029860.1	Qgl_scf0020.1_g029160.1	AT5G52580.1	AT5G52580.1	IV	4.76546	4.77925	4.56304	4.74087	4.55613	4.38734	4.82463	4.98976	5.39965	5.23199	5.09376	4.87578	4.65354	4.98506	5.0186	4.78356	4.62455	4.17552	4.78171	4.84249	4.91018	5.30251	5.31302	5.73006	4.98617	4.81365	4.85282	5.14259	5.17182	4.96034	5.22305	5.1844	5.13381	5.82297	6.14704	6.32635	6.5761	6.06354	5.7854	5.27989	5.21194	5.45488	5.34816	5.3554
OG0004145	Lthed_scf0010.1_g029470.1	Qgl_scf0020.1_g029030.1	AT3G42170.1	AT3G42170.2	I	5.26152	5.64938	5.81153	5.60393	5.60769	5.55698	5.38605	5.05837	4.93477	5.27273	5.27177	5.28613	5.26314	5.46523	5.29344	5.86866	5.75704	5.78767	5.47702	5.3384	5.21474	5.21339	5.56302	5.62278	5.32278	5.70768	5.26642	5.55149	5.56236	5.84659	5.9057	5.65294	5.73579	5.32465	5.44644	5.71038	6.01203	6.14625	5.778	5.67796	5.65009	5.67189	5.72087	5.83442
OG0004146	Lthed_scf0010.1_g028500.1	Qgl_scf0020.1_g028090.1	AT5G20300.5	AT5G20300.5	IV	3.57142	3.94947	3.59649	3.67007	3.76127	3.68267	3.70645	3.77624	3.93967	4.03909	3.6566	3.36993	3.48579	3.47856	3.41895	4.02107	3.89989	3.92079	3.78586	3.87489	4.1017	3.96059	4.2868	4.2631	3.87544	3.58815	3.40908	3.79176	3.74537	3.77675	4.08213	4.03714	4.0535	4.18976	4.37005	4.09001	4.28051	4.2677	4.08832	3.67393	3.76583	4.09462	4.05243	3.99333
OG0004147	Lthed_scf0070.1_g077870.1	Qgl_scf0080.1_g069640.1	AT2G30390.1	AT2G30390.1	II	4.98043	4.95533	4.71144	4.79879	4.80999	4.97025	4.72836	5.04007	5.00274	5.64183	5.27517	4.70715	4.86129	5.06639	5.04988	4.99856	5.3916	4.82282	4.8976	4.8811	4.84471	5.4173	5.63091	5.20886	5.7096	4.9001	4.63247	5.10979	5.24445	5.07114	5.4443	5.25798	5.28992	5.12385	5.50098	5.27325	5.02615	5.16105	5.08143	5.10051	5.19958	5.23243	5.24537	5.56389
OG0004148	Lthed_scf0120.1_g086610.1	Qgl_scf0120.1_g075820.1	AT2G30580.2	AT2G30580.2	III	2.10718	2.49853	2.77113	3.22418	2.99363	2.81092	2.85548	3.73677	3.59487	4.09304	3.78125	2.60656	1.74892	2.33535	2.78357	2.87798	3.46135	2.96468	2.72091	2.78583	3.59328	3.6781	3.94731	3.74374	3.2325	2.78545	2.3361	2.4442	1.9398	2.71239	2.65054	2.57016	3.03117	2.91798	3.12407	2.90962	2.9514	3.29087	2.92336	2.53464	1.92038	1.8124	2.84385	2.60928
OG0004150	Lthed_scf0090.1_g079390.1	Qgl_scf0060.1_g032920.1	AT5G29000.2	AT4G28610.1	V	5.10427	5.54829	5.46039	5.71122	5.14096	5.22341	5.4571	5.96548	6.1997	6.20888	6.09326	5.478	5.21888	5.19422	5.23729	5.48122	5.36769	5.31312	5.58208	5.48545	5.9695	6.01367	6.10522	6.18121	5.86941	5.60841	5.38819	5.85573	5.82863	5.63135	5.79027	5.69219	5.39731	6.02482	6.43237	6.67755	6.80355	6.76052	6.57879	5.89049	5.55144	5.5156	5.72271	5.72877
OG0004151	Lthed_scf0090.1_g080370.1	Qgl_scf0060.1_g031900.1	AT2G20390.1	AT2G20390.1	III	2.48565	3.08658	3.56924	1.97868	2.72163	2.11566	2.60946	3.59627	3.41433	3.43467	3.08094	3.91784	2.82473	3.30249	2.84768	2.65442	2.457	2.11758	2.95678	3.04474	3.55038	3.21602	3.1365	2.99259	3.46685	3.78107	3.19358	3.50081	2.88374	2.58735	2.91616	2.69962	2.88903	3.02393	2.74289	2.94637	2.20689	2.26401	3.18508	3.3359	2.58371	2.82081	2.59328	2.09523
OG0004152	Lthed_scf0090.1_g081410.1	Qgl_scf0060.1_g030940.1	AT2G20320.2	AT2G20320.2	IV	2.13054	1.83393	2.52839	2.65453	2.49782	2.25552	2.62229	4.2393	4.7606	4.32649	3.90476	2.75941	2.81415	2.33122	2.3473	2.33252	2.5557	2.01921	2.76985	2.63194	3.76811	4.18123	5.0974	5.60487	3.87254	3.15523	2.66378	3.50869	2.86529	2.8635	3.00393	2.76588	2.76788	4.0133	5.01272	5.3525	6.18851	4.89447	4.23392	4.07503	3.54827	3.52204	3.0164	3.0801
OG0004153	Lthed_scf0040.1_g071180.1	Qgl_scf0050.1_g064480.1	AT3G07890.5	AT3G07890.5	III	4.72508	4.65845	4.95791	4.34838	4.4909	4.66503	4.46457	3.66683	3.89536	4.03027	3.82473	4.39046	5.11317	4.83505	4.4037	4.40485	4.74397	4.86869	4.35729	4.39217	3.87076	3.74008	3.92625	4.06058	3.85386	4.53415	4.92104	4.67383	4.63271	4.64366	4.40799	4.64843	4.42624	4.1448	3.57016	3.78846	4.45505	4.06003	4.21746	4.29113	5.0937	4.68202	4.45349	4.68468
OG0004154	Lthed_scf0040.1_g072550.1	Qgl_scf0050.1_g062320.1	AT2G04850.1	AT2G04850.1	I	5.64997	5.21059	4.67718	4.28914	4.74608	4.94812	4.9255	5.05495	2.47724	1.17396	1.01338	2.70557	4.53786	5.19069	4.29961	4.58324	4.10248	4.78075	4.93515	5.01289	4.00362	2.19975	1.18539	0.848493	1.27524	2.74724	5.49278	4.21808	5.6664	5.0761	5.37436	4.76524	5.09777	3.56314	1.47339	0.250888	0.516693	0.759169	1.8226	3.08491	5.02926	5.5131	4.70914	4.38088
OG0004155	Lthed_scf0030.1_g050760.1	Qgl_scf0010.1_g140620.1	AT3G22290.2	AT3G22290.2	V	5.04026	4.84187	4.85629	4.57915	4.4882	4.30363	5.02934	4.74917	4.93511	4.51089	4.52819	4.90946	5.10151	4.64798	4.80106	4.59515	4.71529	4.94927	4.89529	4.86528	4.74327	5.00391	4.6026	4.83931	4.40603	5.0852	5.1855	5.24483	5.1337	5.16173	4.97585	5.0012	4.95449	4.96718	5.18118	5.40851	5.72926	5.2239	5.02663	5.05532	5.15585	5.16177	5.369	4.71294
OG0004158	Lthed_scf0010.1_g171510.1	Qgl_scf0020.1_g167370.1	AT1G76280.5	AT1G76280.5	III	2.04443	1.72819	1.94152	1.95379	1.79117	2.42316	1.99301	1.63532	2.02824	1.8582	2.01506	2.18333	2.22667	2.15958	1.9061	2.15963	2.18593	2.17202	2.12919	2.31405	2.24553	2.05239	2.12116	2.22945	2.17787	2.36958	1.99813	2.52236	2.21565	2.35728	2.31121	2.43763	2.33186	2.17334	2.39085	2.24686	1.99467	2.04295	2.39377	1.96268	2.30887	2.24685	2.23759	2.17652
OG0004160	Lthed_scf0080.1_g073550.1	Qgl_scf0070.1_g039700.1	AT1G74630.2	AT1G74630.2	IV	0.68376	0.260744	0.916743	0.486275	0.414232	0.839047	0.729679	0.989527	0.713427	0.897956	0.573107	1.47432	1.02257	0.508213	0.670626	0.975589	0.796412	0.863559	1.01396	1.14253	1.04975	0.873154	0.649539	0.863681	1.02218	1.82947	0.771359	0.544834	0.52737	0.327263	0.718096	0.455229	0.673756	0.702299	0.356949	0.373366	0.239514	0.195762	0.679676	0.934428	0.628036	0.634287	0.364185	0.548187
OG0004167	Lthed_scf0070.1_g024350.1	Qgl_scf0080.1_g018590.1	AT5G62570.1	AT5G62570.1	V	6.17975	5.91446	5.74941	6.01946	6.09262	5.64127	5.54713	6.02439	6.45115	6.22308	6.25048	5.21726	5.52006	6.15158	6.36785	6.11123	6.27842	5.97723	6.0451	5.85521	5.87681	6.00383	6.0743	6.38405	5.99754	5.14842	5.98214	6.7221	5.99116	6.05157	6.2495	6.1283	5.75554	6.37598	6.58386	6.74441	7.29903	6.92759	5.82642	5.8093	5.55369	6.27178	6.2053	6.75705
OG0004171	Lthed_scf0070.1_g019610.1	Qgl_scf0080.1_g014580.1	AT3G48210.1	AT3G48210.1	III	3.20973	3.01243	2.97405	3.2091	2.99453	2.52528	3.22899	2.68333	2.30197	3.32145	3.15542	4.053	3.44302	3.37882	3.4011	3.2354	2.44198	2.98119	3.53319	3.18864	3.15441	2.98755	3.69611	3.37565	3.20195	3.8887	3.40207	3.55888	3.67035	3.53427	3.25704	3.48389	3.56123	3.36323	3.76815	3.83294	4.1627	4.18986	4.96079	3.871	3.71867	3.57912	3.79731	3.39505
OG0004172	Lthed_scf0070.1_g014090.1	Qgl_scf0080.1_g010820.1	AT3G48330.4	AT3G48330.4	II	6.20476	6.11268	6.70807	6.10692	6.32517	6.3844	6.10083	6.04763	6.08928	6.51732	5.88968	5.85807	5.74974	6.45823	6.6867	6.44071	6.90238	6.6332	5.99215	6.0395	6.21708	6.37122	6.75854	6.63707	6.02295	5.69906	5.9286	6.24158	6.3391	6.34259	6.36314	6.63166	6.57649	6.62339	7.10252	7.12174	7.06473	6.67289	6.48813	6.13362	6.09632	6.46062	6.64025	6.92923
OG0004173	Lthed_scf0070.1_g006440.1	Qgl_scf0080.1_g005530.1	AT1G67340.1	AT1G67340.1	I	6.25506	6.59562	7.14479	7.44106	7.02122	7.01135	7.21779	7.5586	7.50607	7.45336	6.93905	6.74871	6.10848	5.94238	6.75814	6.7904	6.98742	6.7235	6.88743	7.06676	6.89748	7.41675	7.78827	8.64966	6.59917	6.69008	6.26389	6.03073	5.86148	6.21191	6.48039	6.23134	6.01092	6.32174	6.7877	7.53212	7.4448	5.90104	5.30161	5.7337	6.09129	5.84762	5.82242	6.59203
OG0004174	Lthed_scf0120.1_g018420.1	Qgl_scf0120.1_g014150.1	AT5G47180.2	AT5G47180.2	I	3.72307	3.27542	4.01921	3.41677	3.48656	3.5777	3.50755	3.20649	2.82919	2.52044	2.01093	2.99786	3.85197	3.53264	3.26575	3.52152	2.82682	3.30444	3.26864	3.2016	2.88647	2.8306	2.03196	2.74938	2.22052	2.94798	3.6718	3.12067	3.58939	3.44169	3.21583	3.19753	3.22286	2.6952	2.71464	2.79515	2.97095	3.30991	2.601	2.59449	3.2792	3.35553	3.19478	2.7228
OG0004176	Lthed_scf0120.1_g019980.1	Qgl_scf0120.1_g016480.1	AT3G60340.2	AT3G60340.2	I	6.1884	6.25021	6.34049	5.97197	6.26212	6.20195	6.27746	6.05422	5.88351	5.83138	5.89785	5.50882	6.10379	6.16806	6.62103	6.2217	6.27449	6.19357	5.97636	6.286	5.63425	5.84405	5.65502	5.28122	5.71296	6.00168	6.3774	6.14885	6.145	6.05379	6.30112	6.47379	6.50779	6.47108	6.55141	6.53719	6.64443	6.75532	6.5522	6.13833	6.17877	6.13336	6.61918	6.18986
OG0004177	Lthed_scf0120.1_g020030.1	Qgl_scf0120.1_g016550.1	AT4G17440.2	AT4G17440.2	IV	4.59335	4.98918	5.25461	5.47689	5.33586	5.17762	5.19591	5.5924	5.58575	5.73151	5.39433	5.40266	3.66644	4.60162	4.82079	4.91115	4.54417	4.18373	4.60589	4.42899	4.83237	4.80165	5.12539	4.96101	4.16231	4.0387	4.06696	4.67858	4.58706	4.75593	5.07547	4.89497	4.43867	4.68712	4.47519	4.75359	4.7821	4.41705	3.51177	4.40741	4.11473	4.12972	4.3267	5.35748
OG0004178	Lthed_scf0010.1_g153900.1	Qgl_scf0020.1_g143970.1	AT4G16720.1	AT4G16720.1	III	8.04538	7.5601	7.54117	8.03912	7.99526	7.8562	8.53699	8.36959	8.71376	8.39901	8.56128	9.33835	8.40505	7.88435	7.70042	7.68571	7.72259	7.84612	8.26507	8.36006	8.80729	8.71139	8.87904	8.56649	8.48762	9.26479	8.24532	8.7312	8.46201	8.56753	8.58262	8.64844	8.57531	8.59827	8.4042	8.37665	8.32426	8.27199	8.37546	9.24941	8.43921	8.01313	7.84802	8.31862
OG0004179	Lthed_scf0120.1_g021620.1	Qgl_scf0120.1_g017830.1	AT4G16600.1	AT2G35710.1	V	2.84757	3.03666	2.52193	3.5752	3.00513	2.71302	4.01317	5.42606	5.74093	4.9035	3.97522	3.22573	3.11518	3.92541	3.01959	3.06897	2.3222	2.90188	3.97236	4.37944	5.23424	5.6852	5.63516	6.32453	3.81813	4.02373	3.60106	3.38472	3.25313	3.60636	3.69106	3.82977	3.60945	5.24399	6.83904	6.43294	5.152	5.09521	3.69374	4.05526	3.5498	3.80408	3.17931	3.55109
OG0004180	Lthed_scf0120.1_g017830.1	Qgl_scf0120.1_g013810.1	AT4G17040.1	AT4G17040.1	II	5.13386	5.14912	4.72851	5.32234	4.63814	4.97549	5.30549	5.70834	5.69333	5.5705	5.12728	5.98115	5.66503	5.54202	4.95179	4.96892	5.20675	4.99053	5.60059	5.48184	5.49895	5.68244	5.38403	5.44164	5.69473	5.85029	5.44824	5.71711	5.51913	5.46868	5.63552	5.7903	5.62438	6.30668	6.16872	5.94592	5.4746	5.16639	5.82649	6.41649	6.08476	5.73776	5.28043	5.62594
OG0004183	Lthed_scf0120.1_g007480.1	Qgl_scf0120.1_g006110.1	AT4G19185.1	AT4G19185.1	IV	4.02132	4.48372	3.82507	4.01667	4.07225	4.19758	4.44166	4.61031	4.55802	4.62471	4.31723	3.41577	3.60992	3.85679	4.11349	4.21019	4.33154	4.37332	4.4138	4.37745	4.44814	4.54343	4.60596	4.85714	4.33799	3.7507	3.96902	3.9273	3.81965	3.76329	4.31536	3.93112	3.93994	4.27221	4.82913	5.24405	5.36537	4.85529	4.33129	3.82495	3.7869	3.97637	4.02573	3.99113
OG0004184	Lthed_scf0120.1_g007910.1	Qgl_scf0120.1_g006600.1	NA	NA	IV	8.31521	8.47107	8.60151	9.37973	10.1743	9.0491	8.18136	9.64043	10.6551	9.62692	9.79335	8.89141	8.4669	8.42613	10.3713	8.94784	8.05561	7.06905	7.78344	8.57341	9.44492	10.0675	10.1267	12.5906	9.21218	8.55431	8.72078	8.37706	7.79765	7.4374	7.21977	7.68631	7.16808	8.34828	10.1075	11.0785	10.8539	10.8295	7.5049	8.16545	7.67287	7.32322	7.25925	7.25881
OG0004185	Lthed_scf0120.1_g007350.1	Qgl_scf0120.1_g005840.1	AT4G19230.1	AT4G19230.1	V	1.43948	2.4323	3.294	4.77284	4.50529	4.34037	1.34149	0.321577	3.23776	0.382573	1.28242	2.44141	2.11304	3.8187	4.90267	4.0657	3.21466	1.40748	0.328842	2.46896	0.577836	1.19063	1.6076	1.81248	3.41419	2.53084	1.41638	2.67711	2.42171	3.59727	1.49978	2.89886	1.82136	1.67812	4.28861	3.64138	0.890011	3.9202	1.42491	2.01334	1.53274	1.78962	4.42739	2.42206
OG0004188	Lthed_scf0120.1_g014280.1	Qgl_scf0120.1_g010500.1	AT1G32400.3	AT1G32400.3	V	6.32119	6.24988	6.41548	6.33372	6.07865	6.34698	6.51054	6.78748	7.06878	6.90135	6.40767	6.42044	6.59781	6.20171	6.28474	6.07668	6.53515	6.59963	6.31984	6.31984	6.41358	6.90952	7.23405	7.25831	6.38573	6.62473	6.45483	6.32211	6.26683	6.61645	6.38828	6.56076	6.47416	6.69428	7.0397	7.44882	7.097	6.46285	6.06217	6.46425	6.54259	6.156	6.17181	6.51804
OG0004190	Lthed_scf0120.1_g001660.1	Qgl_scf0120.1_g001820.1	AT4G19070.2	AT4G19070.1	IV	3.30537	3.53573	2.43867	3.39503	3.78674	3.43557	3.39791	3.15285	3.07917	3.39268	3.09816	3.8153	3.43949	3.25051	3.22088	3.2133	3.30071	3.62511	3.55412	3.35032	3.10037	3.29051	3.4616	3.08025	3.36302	3.62345	3.42116	3.17643	3.27025	2.99616	3.09566	2.98309	2.7835	3.02234	3.20338	3.15422	3.30318	3.53343	3.4119	3.25984	3.4298	3.37689	2.45447	3.18039
OG0004191	Lthed_scf0010.1_g008910.1	Qgl_scf0020.1_g009950.1	AT4G34660.3	AT4G34660.1	V	3.41961	3.42846	4.06945	3.88807	3.43039	2.96127	3.15342	4.15064	3.97202	4.50222	3.69338	2.40776	3.59643	4.03634	4.19892	3.99989	3.77063	3.31474	3.33739	3.50645	4.04896	4.44019	4.94848	4.41451	3.70131	2.61469	3.88635	3.88509	3.9041	4.01443	3.71799	4.1205	3.44493	4.69935	5.23522	5.51122	5.5453	5.09145	4.08445	3.66973	3.82944	4.26553	4.39082	4.33277
OG0004192	Lthed_scf0010.1_g150760.1	Qgl_scf0020.1_g141130.1	AT2G46800.5	AT2G46800.5	I	4.35868	3.37412	4.11408	4.10014	3.87173	3.9058	4.12128	4.09478	4.33884	4.32165	4.64265	5.23301	4.00683	4.19248	4.2239	3.89973	3.6674	4.30637	3.89109	4.13852	4.12004	4.13666	4.16496	4.30638	4.25309	4.61844	4.3393	3.97726	4.12017	4.15254	3.90194	3.64153	3.92543	3.57439	3.59311	4.41898	4.39513	4.52172	4.16871	3.87266	3.99803	3.80274	3.95805	3.79994
OG0004193	Lthed_scf0010.1_g150360.1	Qgl_scf0020.1_g140770.1	AT1G32930.1	AT1G32930.1	I	4.09523	3.61928	3.32417	3.77101	3.49479	3.80182	4.16948	3.78338	2.82006	2.49003	3.74055	4.7052	4.40554	4.09739	3.69786	3.53687	3.21442	3.44638	4.36476	4.07953	3.89132	3.52697	2.94346	2.53927	3.57169	4.74338	4.34164	4.1957	4.56409	4.4574	4.36614	4.11991	4.12579	3.31275	3.33174	2.41964	2.2534	3.37963	4.01453	4.84204	4.43318	4.00977	3.83943	3.78051
OG0004194	Lthed_scf0010.1_g149980.1	Qgl_scf0020.1_g140310.1	AT1G32790.1	AT1G32790.1	I	6.35547	5.93178	6.23964	6.01432	6.29117	6.29258	6.38504	6.19556	6.18677	6.49761	6.36308	6.13362	6.10917	6.11649	6.19543	6.3544	6.6467	6.4247	6.12008	6.24022	6.24855	6.50514	6.34473	6.15586	6.24581	6.13694	5.99208	5.85808	6.02287	6.21524	6.09822	6.24512	6.23363	5.95417	5.89832	5.94416	6.2169	6.15484	5.71692	6.00139	5.93854	5.66912	6.03111	6.03166
OG0004195	Lthed_scf0010.1_g149100.1	Qgl_scf0020.1_g139300.1	AT4G17880.1	AT4G17880.1	I	1.93269	1.64056	1.69575	1.67698	1.7847	1.69846	1.59744	1.11734	1.966	1.40546	1.78211	1.63712	1.20147	1.32605	1.30172	2.58245	1.50945	2.5265	2.2909	2.68015	1.78731	1.41586	1.08653	0.605473	2.50446	1.66319	1.01584	2.50113	1.89037	3.38021	2.48588	2.90774	2.70393	1.36954	0.539629	1.46885	1.13703	1.20076	1.24842	1.04074	1.13751	2.78423	2.9431	2.55618
OG0004197	Lthed_scf0010.1_g148000.1	Qgl_scf0020.1_g138330.1	AT4G24100.1	AT4G24100.4	IV	4.06456	4.32228	4.35036	4.15568	4.01326	4.16129	4.35947	4.5876	4.83111	5.16275	4.87022	4.08841	4.50612	4.41725	4.47248	4.41728	4.59253	4.34383	4.51752	4.40303	4.42267	4.80128	5.24288	4.92833	4.71069	4.07933	4.35056	4.54154	4.57981	4.44972	4.49771	4.5044	4.47099	4.54837	4.98302	5.09256	5.04382	4.88672	4.60081	4.24747	4.61926	4.5404	4.65233	4.49589
OG0004198	Lthed_scf0010.1_g147370.1	Qgl_scf0020.1_g137580.1	AT5G24320.1	AT5G24320.1	IV	3.19336	3.4572	3.23409	3.37937	3.29105	3.70048	3.53145	4.08262	4.13757	4.50924	4.44596	3.58541	3.03994	3.44019	3.36465	3.66714	3.4931	3.66281	3.92467	3.68137	4.24621	4.15421	4.35568	4.91293	4.77951	3.68701	3.09543	3.73955	3.40816	3.52562	3.62497	3.41022	3.42655	3.76013	4.76093	4.71707	4.84369	4.71647	4.26417	3.89907	3.20113	3.50405	3.30374	3.62629
OG0004200	Lthed_scf0010.1_g145010.1	Qgl_scf0020.1_g135390.1	AT4G10930.2	AT4G10930.2	V	3.00839	2.93735	3.36419	2.92625	2.96474	3.06783	3.27806	3.34553	3.45569	3.65842	3.50379	3.06321	3.00374	3.19912	2.94231	3.1142	3.31544	3.23329	3.32807	3.23108	3.43792	3.46662	3.43749	3.26481	3.53607	2.98748	2.81205	3.27066	3.22357	3.30584	3.36273	3.36289	3.24454	3.59783	3.75608	3.63027	3.7115	3.66862	3.90437	3.41529	3.27325	3.32328	3.40062	3.34026
OG0004201	Lthed_scf0010.1_g144380.1	Qgl_scf0020.1_g134400.1	AT5G53110.1	AT5G53110.1	V	3.75956	2.67955	4.22231	2.56106	2.98377	4.30184	2.12368	2.58952	3.53731	4.04019	3.65373	2.31119	1.15145	2.04096	2.82979	2.36169	4.20654	3.90259	1.9129	1.8082	2.79524	3.36008	3.95537	3.63301	3.78566	1.57236	1.2459	0.848222	0.583988	0.744881	1.02171	1.07024	1.01588	1.22817	0.632363	0.16285	0.554159	0.744127	0.82941	1.03337	0.593865	0.942417	1.37187	1.83217
OG0004202	Lthed_scf0010.1_g137380.1	Qgl_scf0020.1_g128580.1	AT5G41580.1	AT5G41580.1	IV	4.28021	4.28281	4.66815	4.51662	4.68992	4.41384	4.68831	4.81685	5.00785	5.34911	5.11307	4.4886	3.96884	4.25893	4.53986	4.60636	5.01109	4.65414	4.59834	4.50559	4.87515	5.20061	5.55978	5.39134	4.97135	4.32207	3.90666	4.07533	4.10995	4.31404	4.2896	4.46031	4.3652	4.73814	4.93969	5.15929	5.40871	5.08763	4.96358	4.32666	4.04553	4.20003	4.27043	4.4307
OG0004203	Lthed_scf0120.1_g066850.1	Qgl_scf0120.1_g059360.1	AT5G41350.3	AT5G41350.3	IV	4.43083	4.86967	5.18817	4.85303	4.65261	5.15015	4.84878	5.60365	5.69781	5.88884	5.60737	4.71738	4.0849	4.36992	4.75823	4.85473	5.20448	4.93879	4.97915	4.93836	5.40953	5.63723	6.14497	6.35002	5.13721	4.99005	4.31587	4.792	4.46218	4.3306	4.69905	4.83518	4.66911	5.39619	5.81792	6.00507	6.39493	6.16547	5.57591	4.77964	4.04463	4.87252	4.95692	5.22956
OG0004204	Lthed_scf0120.1_g066970.1	Qgl_scf0120.1_g059550.1	AT2G45970.1	AT4G00360.1	I	7.46565	7.32007	6.91364	7.58937	6.96897	7.29833	7.81506	7.21704	6.57666	6.52816	6.28035	5.81326	7.74637	6.42063	4.1886	7.28565	6.91795	7.93006	7.96062	7.82708	6.34552	5.84603	4.93575	3.90878	5.41866	4.70718	8.04759	5.95173	7.66696	8.1214	7.34168	6.26732	7.99706	4.1749	2.54218	0.187687	0.201667	0.31678	1.17968	4.82737	8.50435	7.05313	6.29655	6.16173
OG0004205	Lthed_scf0120.1_g068690.1	Qgl_scf0120.1_g060770.1	AT5G41210.1	AT5G41210.1	V	5.5105	5.14794	5.25758	5.30874	5.471	5.10653	5.46673	5.37681	5.37631	5.30023	5.2185	5.19872	5.28445	5.81726	5.63517	5.45879	5.69593	5.73262	5.40095	5.43366	5.11921	5.36165	5.05439	4.75507	5.37972	5.2257	5.33129	5.91873	5.72893	5.94716	5.43609	5.91599	5.91212	5.84147	5.7589	5.49835	5.59673	5.56066	5.61663	5.79327	5.8865	5.61779	5.71477	5.86803
OG0004206	Lthed_scf0120.1_g033710.1	Qgl_scf0120.1_g029770.1	AT5G23750.2	AT5G23750.2	V	4.63051	3.83729	4.08417	4.6019	4.13808	4.46652	3.36067	3.13108	2.81914	2.15308	0.191094	0.611481	1.75995	3.31388	3.6513	4.30734	4.21034	4.3205	3.77694	4.32262	2.98437	2.26801	2.23017	1.99759	1.83555	1.67786	4.64621	2.57121	3.77281	4.36305	3.58925	3.55858	4.25714	2.48813	2.64699	2.02065	1.15584	0.299664	1.27974	0.713249	3.23989	4.64103	4.09482	3.81865
OG0004207	Lthed_scf0120.1_g031730.1	Qgl_scf0120.1_g027630.1	AT1G12650.4	AT1G12650.4	III	4.21285	4.41584	3.60732	3.93506	4.1518	4.09095	4.56358	4.32889	4.54404	4.32036	4.30489	4.55455	4.18118	3.83047	3.9234	3.88954	4.1337	4.07932	4.07436	4.3149	4.44423	4.47434	4.42062	4.00396	4.51534	4.80985	4.04247	3.82664	3.6413	3.44514	3.80659	3.78966	4.0615	4.11145	3.79718	3.77626	4.00878	4.02929	4.26497	4.17664	3.62734	3.46233	3.51595	3.43384
OG0004208	Lthed_scf0120.1_g030730.1	Qgl_scf0120.1_g026120.1	AT1G62990.1	AT1G62990.1	IV	5.74241	5.81884	5.78708	5.86337	5.5558	5.55032	5.17092	5.68422	4.90155	5.05366	5.13017	5.27294	4.88639	5.51135	5.28042	5.72856	5.67107	5.69404	5.60949	5.62914	5.28035	5.08182	5.04767	5.17208	5.20896	5.04876	5.41241	5.17499	5.6578	5.48928	5.42316	5.50573	5.59831	5.30809	5.15571	4.90834	5.31622	4.72259	5.4665	5.23591	5.28234	5.66983	5.32887	5.74487
OG0004209	Lthed_scf0120.1_g030510.1	Qgl_scf0120.1_g025910.1	AT4G22890.4	AT4G22890.3	II	5.69264	5.15083	5.67442	5.33207	4.78121	5.14922	5.11681	5.13096	4.85948	5.65384	5.02219	4.92545	6.01569	5.48286	5.235	5.34199	5.69427	5.08205	4.96523	5.1128	4.79287	5.10639	5.42791	5.49337	5.7556	4.90447	5.77151	4.71464	4.74854	4.62516	4.73243	4.98309	4.97458	5.45831	5.543	5.37192	4.7877	4.82817	5.57563	5.38311	5.77988	5.9599	5.38952	5.45374
OG0004210	Lthed_scf0120.1_g028300.1	Qgl_scf0120.1_g024600.1	AT4G22860.1	AT4G22860.1	I	1.92119	2.2177	2.06644	2.5581	2.80362	2.63608	2.59995	1.24691	0.445901	0.203931	0.382786	3.56313	2.54429	2.28641	1.53796	2.02575	2.24546	2.3462	3.02945	2.61256	1.58268	0.715906	0.494978	0.196819	0.759547	3.19854	2.20504	2.10229	2.90502	2.87534	2.35838	2.34414	2.54016	1.45651	0.60178	0.490795	0.552945	0.90854	1.97643	3.11884	2.64651	2.00297	1.83168	1.99954
OG0004212	Lthed_scf0040.1_g027520.1	Qgl_scf0050.1_g109870.1	AT4G22740.2	AT4G22740.2	IV	7.03952	6.90728	6.90972	6.99113	7.19867	7.04216	6.92633	7.42479	8.01388	8.13059	7.88142	6.71752	6.50078	7.03602	7.38304	7.00712	7.07203	7.07806	7.02259	7.07961	7.72605	7.9995	8.60104	8.76584	7.7667	6.69813	6.79206	7.77578	7.68425	7.64229	8.11304	8.19139	8.48581	8.35652	8.90715	9.11934	9.16256	8.85436	8.64468	7.42933	7.21419	7.66314	8.34544	8.50408
OG0004215	Lthed_scf0120.1_g023690.1	Qgl_scf0120.1_g020100.1	AT4G22540.5	AT4G22540.5	I	5.09732	4.62303	4.39712	4.91253	4.62824	4.46833	4.72012	3.97145	3.27263	3.67519	3.95451	4.44531	4.74251	4.52271	4.19003	4.77776	4.34696	4.85772	4.81394	4.57272	3.79217	3.48303	3.00102	2.86601	4.02761	4.63223	4.66018	4.41519	4.72566	5.28878	4.82529	4.79057	4.44166	3.85568	2.87673	2.50609	3.25746	3.52587	3.99018	5.02429	5.14629	5.20464	4.68718	4.90039
OG0004217	Lthed_scf0040.1_g083670.1	Qgl_scf0050.1_g052760.1	AT1G53490.1	AT1G53490.1	IV	1.77217	2.05741	1.90322	2.04755	1.95817	1.56255	1.73947	2.60393	2.18768	2.7135	2.74817	3.49337	2.36636	1.79414	1.87053	1.76281	1.1601	1.6403	2.48182	2.04149	2.25156	2.2787	2.24509	1.88692	2.32276	2.93472	2.24639	2.0806	2.14342	2.12058	2.41839	2.10759	1.8777	2.41261	2.08155	2.007	2.08819	2.27352	2.63795	2.34447	2.29285	2.46219	2.17336	1.83522
OG0004218	Lthed_scf0040.1_g081570.1	Qgl_scf0050.1_g055370.1	AT1G16920.1	AT1G16920.1	I	5.82297	5.86346	5.59694	6.09209	5.67221	5.71382	5.78722	5.18076	4.59784	4.08499	4.37998	5.9209	6.23096	5.96777	5.75642	5.41476	5.31286	5.64617	5.78914	5.51638	5.23257	4.59462	4.04541	4.17482	4.85611	6.16522	6.16906	5.87915	6.02218	5.98105	5.63781	5.67534	5.75718	5.62558	5.00719	4.71826	4.88948	4.96538	5.75631	6.49435	6.33586	5.79256	5.48114	5.37796
OG0004219	Lthed_scf0040.1_g052040.1	Qgl_scf0050.1_g086800.1	AT2G42580.1	AT2G42580.1	I	4.35588	4.63416	4.17764	4.60127	4.43236	4.27819	4.26235	3.07609	2.8411	2.0187	2.58945	4.88611	4.97478	4.3339	3.82683	4.2679	3.91976	4.49299	4.45804	4.34409	3.3824	2.67386	2.01166	2.20406	2.67176	4.5776	4.53026	4.08422	4.5005	4.76866	4.32252	4.32251	4.40829	3.26577	1.39701	1.05536	0.890443	1.20509	2.59587	4.18939	4.68368	3.98624	3.85606	3.80237
OG0004220	Lthed_scf0040.1_g077600.1	Qgl_scf0050.1_g057840.1	AT1G17780.5	AT2G16575.1	IV	3.28102	3.28626	3.24025	3.43487	3.22748	2.84253	3.32381	3.86461	3.779	4.20639	3.81857	3.58729	3.20489	3.52521	3.39836	3.18004	3.37219	2.97327	3.38335	3.59969	4.02701	4.19719	4.26697	4.07547	3.65128	3.59359	3.01205	3.31725	3.15156	3.45052	3.4561	3.58575	3.48022	3.80661	3.89474	3.83925	3.91454	3.67597	3.78589	3.4512	3.42997	3.37881	3.71652	3.53003
OG0004221	Lthed_scf0040.1_g095700.1	Qgl_scf0050.1_g043980.1	AT3G15354.3	AT3G15354.3	II	2.92536	2.86012	2.91605	2.97082	2.04153	2.57539	2.47182	3.13582	3.05913	3.09292	3.1869	2.88129	3.0541	3.2458	2.75794	3.09344	3.07819	2.76923	3.13358	2.84003	3.27643	3.38741	3.57026	3.47168	3.72952	2.6459	2.99786	3.62675	3.12733	2.33743	2.7329	2.41271	2.46631	3.27698	3.42588	3.69243	3.83749	3.84279	4.30712	3.37011	2.7763	3.77321	2.47361	2.93209
OG0004222	Lthed_scf0040.1_g095010.1	Qgl_scf0050.1_g044500.1	AT4G27520.1	AT5G53870.1	III	6.13336	6.1663	6.90725	7.18943	7.55117	7.36445	6.20879	7.46841	8.65098	7.17676	5.90247	5.24629	6.45077	5.83176	7.37696	7.07076	6.72262	5.85687	5.46564	6.6444	6.58701	7.27985	7.06587	7.70455	6.65505	4.27087	6.21668	2.94793	3.53401	3.66069	3.74337	4.69976	4.10825	5.95436	6.86644	6.49889	3.65284	5.2786	2.95684	2.02776	4.23446	4.10565	4.88931	3.89295
OG0004223	Lthed_scf0040.1_g100550.1	Qgl_scf0050.1_g040710.1	AT1G52980.1	AT1G52980.1	III	5.4292	5.44484	5.68614	5.35739	5.83777	5.81369	5.74044	5.58768	6.00583	6.3989	6.26647	5.88355	5.24096	5.31131	5.46836	5.48433	6.30922	5.76326	5.39154	5.64294	5.83748	6.17289	6.21705	6.1135	6.25946	5.73592	5.13395	5.54108	5.31951	5.49816	5.61154	5.6965	5.82371	5.99157	6.40132	6.35794	6.29874	6.20847	6.01484	5.8408	5.3308	5.42838	5.65195	5.80387
OG0004226	Lthed_scf0040.1_g105550.1	Qgl_scf0050.1_g035710.1	AT4G21450.1	AT5G54110.1	V	6.26676	6.09219	6.47174	5.92987	6.51366	6.64994	6.63951	5.57207	5.09707	5.04893	5.31179	6.24505	5.95262	6.35068	6.31637	6.41805	6.87806	6.62517	6.18306	6.33726	5.16204	4.88268	4.93969	4.00608	4.99124	5.76481	5.80101	6.03142	6.03618	6.42761	6.42282	6.45261	6.5893	5.55201	5.0197	4.83502	4.36487	4.64932	5.04236	5.5195	6.15337	5.96875	6.21141	6.37601
OG0004228	Lthed_scf0040.1_g122340.1	Qgl_scf0050.1_g018650.1	AT4G26780.1	AT4G26780.1	III	4.25739	3.96873	3.62783	3.9952	3.88087	3.85267	3.95074	4.23435	4.64654	4.37363	4.54882	5.08497	4.3409	4.21367	3.87606	3.71268	4.3225	4.14589	4.03067	4.18567	4.57513	4.44764	4.5652	4.5443	4.33037	5.183	4.00725	4.61864	4.05323	3.9662	4.32757	4.2659	4.29397	4.58142	4.46281	4.72737	4.58847	4.9147	5.49974	5.02543	4.16604	4.13938	4.08887	3.76523
OG0004229	Lthed_scf0040.1_g123360.1	Qgl_scf0050.1_g017840.1	AT1G16240.4	AT1G16240.4	I	5.8466	5.39983	5.89291	5.61166	5.58559	5.70162	5.70382	5.69147	5.67406	5.82305	5.72389	5.6313	5.7145	5.93039	5.94573	5.53868	5.84707	5.88241	5.61034	5.78578	5.25848	5.53286	6.1949	5.74762	5.70862	5.67901	5.78017	5.8837	5.72385	5.82146	5.83111	6.02003	6.03778	5.825	5.65483	5.76614	5.93766	5.70023	5.91624	5.90929	5.97874	5.76538	5.94162	6.02348
OG0004231	Lthed_scf0040.1_g126410.1	Qgl_scf0050.1_g014600.1	AT5G55580.1	AT5G55580.1	II	3.35979	3.59478	3.28878	3.43218	3.37649	3.56085	3.66383	3.36967	3.63717	4.22864	3.99546	3.63214	3.4461	3.22732	3.21852	3.42032	3.3708	3.34364	3.44159	3.58869	4.21899	3.74438	3.78947	3.44577	3.69015	3.42421	3.38115	3.05073	2.96663	2.91696	3.21205	3.51036	3.2938	3.63096	3.48457	3.22557	3.38333	3.82367	4.73432	3.30977	3.3841	3.38479	3.17544	3.26273
OG0004232	Lthed_scf0040.1_g129380.1	Qgl_scf0050.1_g010840.1	AT5G55760.1	AT5G55760.1	V	3.78569	4.00412	4.12041	3.92072	4.17562	4.19227	4.40425	4.59147	4.49254	4.84258	4.84594	4.2104	3.77353	3.8097	3.86342	4.08011	4.78686	4.38312	4.06128	4.10077	4.25156	4.50034	4.62369	4.04654	4.44763	3.75823	3.45686	3.55617	3.57992	3.66898	3.62933	3.92774	3.87494	3.95442	4.3	4.02535	4.29622	4.38914	4.18606	3.47869	3.5194	3.26032	3.51877	3.85182
OG0004233	Lthed_scf0040.1_g130280.1	Qgl_scf0050.1_g010030.1	AT5G47750.1	AT5G47750.1	I	6.07678	6.34788	6.03246	6.18745	6.01977	5.97697	6.39742	5.90663	5.70832	6.04233	6.26705	6.32537	6.42246	6.42927	6.13835	6.14315	5.93551	6.10597	6.4662	6.2916	6.30708	6.12037	5.94944	5.52408	6.09513	6.0664	6.25286	6.54539	6.64542	6.50043	6.4002	6.32053	6.2255	5.85104	5.44309	5.59534	6.00541	6.1051	6.25192	6.49829	6.62108	6.36957	6.18949	6.17507
OG0004239	Lthed_scf0010.1_g115930.1	Qgl_scf0020.1_g101330.1	AT4G25850.1	AT4G25850.1	III	4.18259	4.11927	4.01082	3.7314	4.03623	4.0226	2.93329	2.89107	2.69789	2.98366	2.93126	2.45469	2.9538	2.78756	2.97213	3.95174	4.05832	3.7932	3.38397	3.42516	2.20713	2.77914	2.50915	2.14278	3.3835	2.13357	2.97856	2.1884	2.95748	2.9866	3.28881	3.02199	3.23026	2.5306	2.41	1.37741	1.44498	1.3842	1.32163	2.08209	2.9526	3.28089	3.26789	3.19605
OG0004241	Lthed_scf0100.1_g082480.1	Qgl_scf0100.1_g032280.1	AT4G37680.4	AT4G37680.4	IV	4.93892	4.6847	4.21238	4.36641	4.10491	4.42062	5.35841	5.92935	5.98461	5.54604	4.79793	3.71047	5.04759	4.93182	4.73838	4.58169	4.2874	4.52081	5.18474	5.3817	5.7713	6.01912	5.52508	6.40153	4.81966	4.12083	5.45013	4.91116	5.19477	5.36795	5.2234	5.79941	5.66307	6.64242	6.84866	7.27278	6.73372	5.66647	4.58415	4.2491	5.86394	5.79925	5.5903	5.15481
OG0004246	Lthed_scf0120.1_g050770.1	Qgl_scf0120.1_g045800.1	AT1G22050.1	AT1G22050.1	III	4.73856	4.20714	4.07266	4.33061	4.61511	4.1922	4.74379	4.67745	4.78682	5.2734	4.62328	3.98753	5.14536	4.80394	4.34274	4.37144	4.12257	4.18523	4.54335	4.86328	4.25483	4.88007	5.11028	4.12586	4.10539	4.59674	4.56893	4.65312	5.11947	4.81108	4.9747	5.09431	4.92003	5.07613	3.71477	4.55356	4.67754	4.50167	4.3481	3.63377	4.54922	4.65045	4.96237	4.50092
OG0004250	Lthed_scf0120.1_g084950.1	Qgl_scf0120.1_g074640.1	AT3G63340.7	AT3G63340.7	IV	1.47688	1.47085	1.93031	1.28182	1.67585	1.56005	1.20761	1.85692	1.83273	1.64644	2.00118	1.94135	1.41698	1.89417	1.65967	1.95889	2.14247	1.86009	1.52363	1.72334	1.76155	1.84081	1.79277	2.17897	1.98958	1.60178	1.25679	2.24451	2.28559	2.31852	2.63628	2.32591	2.33988	2.67564	2.76359	2.86882	2.9806	2.77457	2.49656	2.09432	2.21641	2.4763	2.70778	2.33807
OG0004255	Lthed_scf0050.1_g112700.1	Qgl_scf0040.1_g138400.1	AT1G09280.1	AT1G09280.1	I	2.99787	3.31579	3.60834	3.08062	3.42959	3.46381	3.36128	2.64035	2.55409	2.56858	2.761	3.25011	2.68702	2.70126	2.52381	2.84969	3.16052	3.2275	2.85176	2.9179	2.86665	2.42418	2.51585	2.50513	2.52982	2.8395	2.34131	2.51632	2.32755	2.64932	2.6309	2.79644	2.43455	2.59472	1.59213	1.6981	2.2688	2.03485	2.73454	2.70353	2.42918	2.32668	2.46148	2.36093
OG0004256	Lthed_scf0110.1_g001610.1	Qgl_scf0110.1_g082780.1	AT4G35910.1	AT4G35910.1	IV	3.64992	3.33634	3.94966	3.79523	3.60753	3.58667	3.68264	3.78673	3.40822	3.60942	3.56797	3.91435	3.6457	3.34961	3.15469	3.69336	3.61313	3.6603	3.303	3.46732	3.59541	3.29261	3.66443	3.65208	3.69219	3.92629	3.73941	3.58578	3.67706	3.54924	3.89816	3.5444	3.62313	3.53175	3.37567	3.55505	4.05881	4.09887	4.17954	4.03531	3.58588	3.57308	3.6693	3.45103
OG0004263	Lthed_scf0100.1_g085630.1	Qgl_scf0100.1_g018610.1	AT2G23620.1	AT2G23620.1	I	5.42383	5.60481	6.57679	5.58803	6.45253	7.00223	6.24395	5.86176	5.65783	5.64927	4.31133	4.7642	4.8207	5.22278	5.44506	5.21815	6.52979	5.87835	5.259	5.36838	4.98945	4.95129	4.47852	4.68937	4.13122	5.08211	5.15827	5.9811	5.94289	6.42244	6.18176	6.03295	5.90006	4.75771	4.01509	4.06211	4.11152	3.30359	4.28348	5.76269	5.65789	5.42571	5.80258	6.52193
OG0004265	Lthed_scf0100.1_g090720.1	Qgl_scf0100.1_g014210.1	AT5G66550.1	AT5G66550.1	II	0	0	0	0	0	0	0.186121	0	0	0	0	0.52184	0	0.138827	0.124885	0	0	0	0	0.275957	0.242714	0.232335	0.393767	0.0981502	0.126182	0.942436	0	0	0	0	0	0	0	0.0718117	0.184891	0	0	0.0924327	0	0	0.0753735	0.072016	0	0
OG0004271	Lthed_scf0100.1_g020760.1	Qgl_scf0100.1_g086470.1	AT5G11240.1	AT5G11240.1	III	2.97805	3.0826	3.3573	3.33754	3.00269	3.29351	3.58748	3.40857	3.51969	3.54727	3.62758	3.49116	3.12098	2.83529	2.96322	3.12481	3.22769	3.01032	3.47186	3.40184	4.20386	3.70969	3.88719	3.77004	3.7113	3.79108	2.85017	3.34166	3.02462	3.27784	3.48854	3.30165	3.30712	3.46422	3.39144	3.35051	3.35947	3.56854	4.16689	3.75882	2.69924	2.95298	3.11824	3.14979
OG0004277	Lthed_scf0100.1_g043740.1	Qgl_scf0100.1_g064140.1	AT4G13720.2	AT4G13720.2	III	3.79982	3.98072	4.18923	3.70621	4.14498	4.25148	4.39968	4.50467	3.77795	4.42508	4.33283	5.02412	4.27043	4.32779	4.51378	4.03399	4.44256	4.26071	4.31414	4.23529	3.58157	4.23627	3.9704	3.06477	4.216	4.45363	4.10174	4.08822	4.28861	4.23992	3.83794	4.03624	3.97569	3.83371	3.35396	3.71171	3.31305	3.20222	3.15805	4.2519	4.10289	3.86352	3.9367	4.02587
OG0004284	Lthed_scf0100.1_g058790.1	Qgl_scf0100.1_g053590.1	AT1G48360.2	AT1G48360.2	III	2.21194	2.13962	1.77692	2.47093	2.02976	2.22143	2.50798	1.90903	1.90027	2.26933	2.01419	2.8901	2.55481	2.01007	1.99412	2.23059	2.17599	1.9619	2.60147	2.48646	1.91956	2.00035	2.29167	1.69425	2.35256	2.6632	2.29695	2.55835	2.63809	2.57978	2.45224	2.59986	2.06712	2.40703	2.10723	2.04838	2.01066	1.85392	1.88391	2.80984	2.64294	2.08548	2.03515	2.27736
OG0004285	Lthed_scf0030.1_g027780.1	Qgl_scf0010.1_g161840.1	AT1G79120.2	AT1G79120.2	II	1.47112	2.00303	1.58444	1.80982	1.94837	1.49204	2.17905	1.62711	2.33215	1.87875	2.35436	1.5886	1.06945	1.78462	1.28767	1.40734	1.65042	1.68214	1.34654	1.57165	1.9822	2.04864	1.7674	1.75448	1.61167	2.19291	0.925055	1.67701	1.41491	1.73766	1.90687	1.50838	2.16962	1.89728	1.50577	1.38532	1.37657	1.55935	2.08338	1.83164	1.60453	1.51153	1.11485	1.83606
OG0004286	Lthed_scf0070.1_g087600.1	Qgl_scf0080.1_g079780.1	AT3G59300.1	AT3G59300.1	I	4.04305	4.01279	4.06882	3.67727	4.0376	4.01444	3.81584	3.49091	3.16875	3.35149	3.46415	3.00775	4.155	3.89106	3.99688	3.93824	4.00049	4.094	3.51204	3.85153	3.13307	3.41399	3.62815	3.26099	3.87784	3.36223	3.69301	3.77368	3.56677	3.83101	3.83288	4.01081	3.9368	3.78907	3.6879	3.36886	3.03494	3.09184	3.65244	3.64613	4.19517	3.8968	4.03697	4.10607
OG0004287	Lthed_scf0070.1_g090610.1	Qgl_scf0080.1_g084030.1	AT1G05950.5	AT1G05950.5	V	3.24016	3.38941	2.83625	2.65107	3.11638	2.93655	3.40244	2.55727	2.45556	3.08928	3.54483	4.08824	3.2247	3.12944	3.77106	3.43085	3.55696	3.11735	2.85543	3.25225	3.1327	3.26179	2.88189	2.45871	3.31759	3.96827	3.06124	3.4665	3.70479	3.34252	3.71683	3.5888	3.78253	3.0235	2.90048	2.6389	2.26677	2.90523	3.03592	3.07996	3.2077	3.13825	3.67384	3.31169
OG0004289	Lthed_scf0100.1_g016250.1	Qgl_scf0100.1_g089160.1	AT4G15820.1	AT4G15820.1	IV	2.8654	1.99581	2.56219	2.66486	2.4122	2.73089	2.8903	3.22761	3.38959	3.20601	3.38149	3.13752	2.91774	2.57599	2.55334	2.30571	2.28589	2.40772	2.64127	3.02967	3.51068	3.26687	3.66593	3.54119	3.37461	3.48504	2.76999	3.07366	3.33743	3.14895	3.38464	3.36338	3.19804	3.68628	3.76339	3.98542	3.93901	4.00836	4.236	3.42013	3.20552	3.20683	2.94271	2.99852
OG0004292	Lthed_scf0100.1_g008010.1	Qgl_scf0100.1_g097810.1	AT5G19050.1	AT5G19050.1	IV	4.25561	3.83178	3.94252	3.83389	4.39678	3.94323	4.08858	4.00887	4.30231	3.99271	4.01497	3.82236	3.93037	3.83926	4.04341	3.8542	3.69103	3.89004	3.76731	4.026	4.03993	4.22096	4.27536	4.39014	3.67709	3.62869	3.94275	3.77449	3.85321	3.7417	4.2471	4.19427	3.95992	4.04958	4.0481	4.39274	4.4221	3.8766	4.06803	3.55941	3.66133	3.77246	4.11532	3.8987
OG0004295	Lthed_scf0100.1_g003470.1	Qgl_scf0100.1_g101710.1	AT1G05430.1	AT1G05430.1	III	4.52817	3.4293	3.56449	3.51547	3.79248	3.56592	4.24043	4.91002	4.70216	4.33237	4.44899	4.48111	4.79168	4.25644	4.18148	3.9008	3.76845	4.06556	4.10655	4.2379	4.52393	4.7823	4.91361	4.61502	4.40571	4.69241	4.59818	4.61773	4.47154	4.2481	4.3504	4.30955	4.23852	4.70296	4.88517	4.82128	4.65726	4.77441	4.85027	4.84563	4.75085	4.79244	4.19797	4.2614
OG0004296	Lthed_scf0070.1_g097340.1	Qgl_scf0080.1_g090660.1	AT2G43500.9	AT2G43500.9	IV	2.61311	3.02489	2.81819	2.95836	2.66361	2.64362	2.87724	3.53649	3.87862	4.36789	3.9901	2.57235	2.19253	2.69848	2.40659	2.87252	3.32494	2.99994	3.15099	2.98753	3.86413	3.86551	4.06642	3.93895	3.85629	2.67126	2.51177	3.21148	2.84512	3.13411	3.35202	3.17362	3.38254	3.86697	4.04285	4.42409	5.01409	4.79292	4.0374	3.13717	2.6526	3.19123	3.34377	3.55216
OG0004297	Lthed_scf0100.1_g033970.1	Qgl_scf0100.1_g072550.1	AT2G29420.1	AT2G29420.1	V	5.62237	5.68059	5.45261	4.92082	5.03018	5.30593	4.7004	5.53606	6.29275	6.42455	5.47465	4.1927	4.58826	5.10976	5.95993	5.59299	5.53102	5.37337	4.20973	4.65884	4.689	5.69157	5.57302	5.55102	5.40704	3.5639	5.03765	5.35336	5.07567	5.37609	5.3458	4.87624	4.96561	5.41776	5.8998	6.63549	6.86858	6.1514	4.32741	4.35846	4.67997	5.16248	5.53961	5.2208
OG0004301	Lthed_scf0020.1_g183240.1	Qgl_scf0030.1_g001580.1	AT3G20240.1	AT3G20240.1	III	3.53668	3.23394	3.37011	3.23106	3.10592	3.33333	3.04742	3.53656	3.34348	3.05271	3.40197	3.37712	3.28432	3.35553	2.90334	2.90305	3.19554	3.04303	3.11518	2.79008	3.30892	3.08228	3.17634	3.61243	3.29521	3.45263	3.17989	3.25322	3.17276	2.73117	2.67052	2.66109	2.74324	2.71815	3.59438	3.69502	3.37796	3.47454	3.4323	3.23464	2.99809	2.95498	2.37888	2.33065
OG0004302	Lthed_scf0020.1_g004960.1	Qgl_scf0030.1_g185510.1	AT1G72440.1	AT1G72440.1	IV	3.1425	3.17	2.98191	3.19425	2.91865	2.9731	3.13328	4.1501	4.20093	4.24203	4.35011	3.66362	3.36085	3.13674	2.93284	3.05606	3.14981	3.0688	3.38953	3.4341	4.30459	4.189	4.67554	4.56352	4.15831	3.75175	3.08303	3.64338	3.32269	3.19626	3.54819	3.29124	3.25825	4.09436	4.52036	4.36591	4.13229	4.52634	4.68853	3.91402	3.15586	3.51415	3.18396	3.24611
OG0004303	Lthed_scf0020.1_g015040.1	Qgl_scf0030.1_g174590.1	AT1G72640.1	AT1G72640.1	II	1.59312	1.58324	2.09553	1.72538	0.797997	1.42834	1.23394	1.67899	1.44324	2.18832	1.79248	2.10444	1.43762	1.33323	0.830428	0.894474	1.05411	0.568228	0.835123	1.0269	1.2754	1.68038	1.79626	1.68	2.08015	1.83494	1.48217	1.74425	1.65005	1.71451	1.75415	1.91246	1.72763	3.00797	2.7685	2.23768	2.12123	1.81828	2.37017	2.14844	2.60889	2.95696	1.89531	2.17899
OG0004305	Lthed_scf0020.1_g048140.1	Qgl_scf0030.1_g134070.1	AT5G11460.1	AT5G11460.1	I	5.53037	5.23421	5.3346	4.79933	5.31462	5.53102	5.64315	5.09838	4.62255	4.34949	5.1322	4.96015	5.79584	5.75426	5.45401	5.30097	5.81573	5.29832	5.27881	5.33404	4.8522	4.57358	4.05117	4.19311	4.86808	5.04892	5.53627	6.06608	5.56676	5.44032	5.63676	5.52811	5.48648	5.10597	4.6293	4.46113	4.91325	5.56285	5.79329	5.57848	6.0223	5.66479	5.57361	4.98431
OG0004309	Lthed_scf0020.1_g060500.1	Qgl_scf0030.1_g119880.1	AT1G15290.1	AT1G15290.1	II	3.60173	3.60809	3.61919	3.62519	3.40469	3.61938	4.42724	4.67559	4.36198	4.67752	4.88474	4.84207	4.46395	3.67304	3.09047	3.79799	3.93128	4.01358	4.89053	4.75234	4.88059	4.91187	4.68041	4.44304	5.15364	5.06115	4.02421	4.40687	4.19078	4.02067	4.12131	4.09458	4.12142	4.2393	4.41335	4.06827	3.78265	4.27286	4.84034	4.6454	4.41146	4.39108	3.80174	3.77187
OG0004311	Lthed_scf0050.1_g091780.1	Qgl_scf0040.1_g103160.1	AT1G80750.1	AT1G80750.1	IV	5.71852	5.40589	5.79455	5.87606	5.8767	5.90449	6.36446	6.34038	6.80493	7.34112	7.01364	6.57634	5.56254	5.66374	5.86035	5.83473	6.08826	5.89345	6.24658	6.5416	6.96645	7.13192	7.58779	7.15955	7.17852	6.81799	5.79086	6.45251	6.21907	6.50706	6.84394	6.74768	7.46424	7.4406	7.36683	7.05224	7.01222	7.11709	7.59701	6.89311	6.23915	6.46349	6.71238	6.78178
OG0004314	Lthed_scf0040.1_g024730.1	Qgl_scf0050.1_g112250.1	AT1G56200.1	AT1G56200.2	III	2.53777	1.54855	3.34864	2.10046	3.15382	2.81793	3.00009	3.69347	3.92415	2.88995	2.61535	3.56715	2.25888	2.74486	2.79194	2.67029	2.753	2.81335	2.92227	3.3992	4.45356	4.35648	4.19078	4.86649	3.10285	3.58354	2.86907	3.75837	3.28457	3.60744	3.77788	3.09543	3.24629	4.5812	5.62691	5.649	4.68477	4.52351	3.48482	3.77711	3.21161	2.91665	2.96235	2.90741
OG0004318	Lthed_scf0010.1_g133570.1	Qgl_scf0020.1_g125670.1	AT1G29670.1	AT1G29670.1	I	5.72911	5.61538	5.7235	5.77795	5.78784	6.00802	4.79235	3.73125	3.72901	4.02589	3.86722	4.27219	5.46017	4.90635	4.28292	6.35806	7.25958	6.84736	6.1683	5.65513	4.56866	3.70652	3.5624	2.88425	3.79201	4.39842	5.2484	4.48319	5.20117	5.60184	4.83143	5.58826	5.88012	5.22168	6.07152	4.7974	3.9894	3.54156	3.95798	4.69609	5.16457	5.28775	5.19901	5.1294
OG0004321	Lthed_scf0010.1_g155410.1	Qgl_scf0020.1_g161490.1	AT1G78780.5	AT1G78780.5	IV	2.62567	2.06938	0.857113	0.477774	0.575121	0.80787	1.35958	2.87175	4.15675	4.32737	3.91054	2.02058	2.67188	1.58941	1.25434	2.67051	1.83202	0.876592	1.13941	2.31971	3.73495	4.0959	4.47451	4.1395	4.64234	3.34939	2.52019	5.03899	3.13556	3.39252	3.86255	3.52406	3.74351	4.52521	4.72775	5.40195	6.27226	5.82684	5.29839	4.51659	3.20269	3.17048	3.25598	2.98622
OG0004328	Lthed_scf0060.1_g090710.1	Qgl_scf0090.1_g030510.1	AT4G39670.1	AT4G39670.1	IV	1.11434	2.03239	2.66913	2.13615	2.15618	2.08371	1.33052	1.47687	1.3367	1.40822	1.27917	1.04528	1.35771	1.62753	2.77622	2.21846	1.86063	0.788428	0.329098	1.1385	0.781517	0.587867	1.182	1.58843	1.39699	1.448	1.06197	2.01749	1.48507	1.6729	0.738397	1.68601	1.51075	1.76735	2.69802	2.78548	1.80863	2.79785	1.86893	1.86937	1.43738	0.85844	1.53019	1.64181
OG0004332	Lthed_scf0070.1_g048600.1	Qgl_scf0080.1_g040700.1	AT3G18440.1	AT3G18440.1	IV	4.2421	4.2169	4.88037	4.16918	4.57101	4.66712	4.48417	4.31189	4.47606	4.75633	4.29158	3.76299	4.10976	4.33025	4.50589	4.47795	5.07413	4.8434	4.17811	4.43626	4.43201	4.69295	5.17139	4.90909	4.13244	3.86355	4.13906	4.86688	4.69102	4.75242	4.82361	4.87076	5.06617	4.83733	5.13796	5.0687	5.31427	5.22727	4.81281	4.54924	4.79492	4.87993	4.76229	4.9109
OG0004333	Lthed_scf0070.1_g050490.1	Qgl_scf0080.1_g042110.1	AT1G73805.1	AT1G73805.1	V	3.43716	4.5453	4.68531	3.96404	4.33634	4.66836	1.06474	0.559647	1.49864	0.853159	1.50012	1.73126	3.02177	5.14622	5.97861	5.06641	3.68922	2.47182	1.85649	2.27774	0.854875	0.627101	0.535506	0.252225	1.89433	1.70995	2.63652	4.11307	2.94103	3.02068	2.42173	2.46088	2.41043	2.02062	2.35672	1.50796	0.729307	2.01347	2.50287	1.51515	2.93498	3.35589	4.94524	2.92751
OG0004336	Lthed_scf0070.1_g059330.1	Qgl_scf0080.1_g051640.1	AT1G18290.1	AT1G18290.1	I	2.60806	1.35492	3.15518	1.94031	0.97368	0.310606	2.02346	3.39674	1.9731	0	0.318647	0.30279	0.913399	2.43699	0.78863	1.11474	0.939305	1.03774	2.90346	2.36173	1.9447	0.693826	0.2398	0.698797	0.217213	0.647624	2.22299	1.7232	2.74908	2.0893	1.93988	1.94544	2.52274	1.06986	0.285997	0	0	0	0	0.599848	2.47131	2.56496	2.37958	2.16325
OG0004337	Lthed_scf0070.1_g064640.1	Qgl_scf0080.1_g056740.1	AT1G73470.1	AT1G73470.2	II	3.35884	3.40519	2.89451	3.17957	2.93507	3.84894	3.28512	2.57032	2.57508	2.96528	1.94506	3.14416	3.31158	3.2712	3.29906	2.96513	3.47283	3.23225	3.3821	3.24248	2.24241	2.53471	2.50144	1.78139	2.84523	3.36684	3.30194	2.91921	3.14868	3.59142	2.95054	3.42187	3.09517	2.62335	2.1156	2.09348	1.46595	1.94116	1.51322	2.83972	3.15279	2.82631	2.89592	3.13488
OG0004338	Lthed_scf0090.1_g023840.1	Qgl_scf0060.1_g089600.1	AT3G49080.1	AT3G49080.1	III	4.73542	4.60155	4.77753	4.5692	4.83771	5.02364	5.08811	5.0704	4.56742	4.97081	5.17337	5.47728	4.94008	4.09841	4.59374	4.38575	4.9284	4.95052	4.80517	4.8327	4.82422	4.96651	5.03332	4.419	4.92049	5.37795	4.58423	5.13844	4.81482	4.77896	4.91259	4.95947	5.18205	5.2084	5.20163	4.92635	4.5947	5.45719	5.72201	5.35111	4.72958	4.93967	4.6274	4.85386
OG0004339	Lthed_scf0080.1_g095430.1	Qgl_scf0070.1_g018160.1	NA	NA	II	1.10125	1.99518	1.95749	1.515	1.87848	1.63121	1.88895	1.43207	0.656221	0.84657	1.64801	1.76817	1.98072	1.37105	1.32564	1.66825	1.73964	1.94784	1.80349	1.67392	1.61054	1.29065	1.26035	0.7932	1.53001	1.95742	1.30475	1.16938	1.54334	1.5517	1.83878	1.66923	1.98657	1.47434	1.2147	0.912439	1.16789	1.34718	2.23682	1.82527	1.62184	1.8181	1.97887	1.71818
OG0004344	Lthed_scf0070.1_g073350.1	Qgl_scf0080.1_g068240.1	AT5G23570.3	AT5G23570.3	III	6.21074	6.02383	5.91882	6.17409	6.10729	6.14875	6.29488	5.8351	5.80674	6.05751	6.20237	6.40268	6.30817	6.14051	5.89135	6.47315	6.61385	6.34847	6.34601	6.45116	6.51992	6.40242	6.20682	5.60253	6.17706	6.25056	6.59584	5.82167	6.2191	6.24413	6.52924	6.48316	6.47117	6.13838	5.94714	5.63315	5.5249	5.73145	6.0471	5.8191	6.36045	6.2485	6.54432	6.46727
OG0004346	Lthed_scf0030.1_g142410.1	Qgl_scf0010.1_g028960.1	AT4G30890.3	AT4G30890.3	III	5.36425	5.37253	5.64245	5.5911	5.58424	5.52815	5.69171	5.66368	5.59338	5.75358	5.61564	5.54852	5.49913	5.34709	5.33038	5.54103	5.7976	5.67158	5.7726	5.66531	5.75868	5.74068	5.85172	6.10394	5.73793	5.71395	5.41343	5.58432	5.6676	5.87354	5.98809	5.86556	5.74965	5.70144	5.84625	6.03287	6.11748	5.9446	5.89375	5.83189	5.59539	5.6042	5.82986	5.79868
OG0004347	Lthed_scf0030.1_g122940.1	Qgl_scf0010.1_g053990.1	AT5G47080.1	AT5G47080.1	I	5.85551	5.73352	5.69797	5.68902	5.96189	5.93316	5.95699	5.87358	6.15312	6.00179	5.94365	5.80676	5.79696	5.51571	5.80722	5.73072	5.8532	5.8514	5.82095	5.91789	6.22393	6.25003	6.51195	6.34397	5.98955	5.64304	5.75183	5.96579	5.92997	5.85111	6.13354	6.10762	6.12967	5.82943	5.65609	5.82301	6.00511	5.86213	5.73682	5.55458	5.80478	5.6734	5.94087	5.94094
OG0004349	Lthed_scf0060.1_g046890.1	Qgl_scf0090.1_g073260.1	AT1G55150.1	AT1G55150.1	II	4.40674	4.6035	4.52116	4.7323	4.706	4.37902	4.669	4.56657	4.57277	4.4463	4.56	4.6453	4.70042	4.58481	4.52069	4.55894	4.3482	4.56802	4.6634	4.52662	4.79129	4.59887	4.70261	4.69977	4.56082	4.84893	4.54216	4.38359	4.50584	4.10237	4.3984	4.51453	4.11635	4.43363	4.42019	4.36798	4.70023	4.64881	4.84902	4.43977	4.52491	4.71508	4.17201	4.31372
OG0004352	Lthed_scf0120.1_g018930.1	Qgl_scf0120.1_g014590.1	AT5G59180.1	AT5G59180.1	II	5.84171	5.26301	5.6168	5.39727	5.77807	5.87227	5.76056	4.9134	5.46397	5.41116	5.57313	5.62075	5.70791	5.92391	5.79489	5.96058	5.99872	6.08861	5.49825	5.42966	5.40128	5.45684	5.46181	5.78751	5.36207	5.37393	5.44492	5.4546	5.27672	5.65782	5.64758	5.69253	5.61899	5.46532	5.40183	5.67545	6.03707	5.3946	5.24369	5.38306	5.52542	5.04503	5.54581	5.71477
OG0004354	Lthed_scf0030.1_g021960.1	Qgl_scf0010.1_g168910.1	AT4G30990.3	AT4G30990.3	V	1.88687	2.05621	1.91989	1.91396	1.82337	1.77031	2.23324	2.40479	2.23383	2.90169	2.88862	2.6108	1.9978	2.11235	1.8009	2.10848	2.40926	2.14688	2.26781	2.30849	2.7495	2.81366	2.73471	2.89008	2.90994	2.60444	1.73506	2.54822	2.30469	2.48324	2.54921	2.4489	2.50524	2.84015	2.9538	3.00619	3.05116	3.02746	3.2409	2.81934	2.30179	2.40988	2.18948	2.12762
OG0004358	Lthed_scf0060.1_g022230.1	Qgl_scf0090.1_g095140.1	AT1G08350.3	AT1G08350.3	I	4.59866	4.49972	4.3367	4.84276	4.40724	4.48357	4.59709	4.67054	4.70403	4.42196	4.71517	4.47598	4.77459	4.70979	4.33141	4.52438	4.22664	4.31214	4.85154	4.71137	4.52623	4.5369	4.46521	4.10004	4.59082	4.63656	4.88955	4.90623	5.06162	4.79523	4.79859	4.89156	4.85458	4.82942	4.12424	4.28309	4.54573	4.55703	4.37075	4.58807	5.03974	4.84344	4.72324	4.73
OG0004363	Lthed_scf0110.1_g058020.1	Qgl_scf0110.1_g034490.1	AT2G38660.3	AT2G38660.3	II	3.38705	3.55414	3.88206	3.34704	3.61016	3.69256	3.44005	2.89586	2.73959	3.20323	3.1469	3.74335	2.96026	3.51123	3.51054	3.4774	4.6691	3.94272	3.60158	3.53686	3.01443	3.09741	2.71276	2.82768	3.45965	3.34529	3.0396	3.2783	3.32225	3.73047	3.79504	3.8853	3.91688	3.57931	3.24981	2.93876	2.9157	2.91843	3.43273	3.7851	3.43674	3.54589	3.99562	3.78934
OG0004364	Lthed_scf0110.1_g060600.1	Qgl_scf0110.1_g032600.1	AT3G56400.1	AT3G56400.1	V	7.85413	9.13197	8.62828	7.00782	7.95049	8.33467	5.86648	4.96602	5.37771	5.97904	7.09301	5.19857	7.54191	7.33335	7.5096	7.71333	7.63799	7.65478	6.72812	6.53122	4.82797	4.9209	4.71945	4.52936	5.71723	3.89471	7.31276	4.72283	5.67694	6.3484	4.72112	5.83565	5.96316	3.94305	3.88039	3.28124	3.01828	4.71013	5.28026	3.93737	6.44198	6.8207	7.3715	6.12665
OG0004365	Lthed_scf0110.1_g060930.1	Qgl_scf0110.1_g032250.1	AT3G08760.3	AT3G08760.3	IV	4.32328	4.9427	4.65234	4.68721	4.87668	4.86139	4.02759	4.2348	4.7562	4.32616	3.83095	3.66828	4.32585	4.92925	5.10527	5.14266	4.80381	4.42726	4.3048	4.65638	4.44609	4.48944	4.6135	4.72746	4.0804	3.69086	4.42661	4.80645	4.38324	4.49848	4.74019	4.53458	4.67743	4.99161	5.66932	5.80063	5.01014	5.10984	4.35467	4.2051	4.55296	4.57565	4.94025	4.6102
OG0004366	Lthed_scf0110.1_g066960.1	Qgl_scf0110.1_g027320.1	AT3G51800.3	AT3G51800.3	III	6.66746	6.34059	6.06914	6.61606	6.47114	6.27728	7.02437	7.36309	7.83514	7.47802	7.535	7.77816	7.02444	6.47083	6.35514	6.31974	6.36084	6.39936	6.83227	7.1116	7.58987	7.81517	7.94902	7.87664	7.15646	7.70843	6.81563	7.22944	6.93606	6.93497	7.05921	6.99476	6.9321	7.5565	7.92215	7.90493	7.77068	7.84068	7.58966	7.49158	7.09525	6.94929	6.76305	6.54137
OG0004367	Lthed_scf0110.1_g067010.1	Qgl_scf0110.1_g027140.1	AT3G51820.1	AT3G51820.1	II	5.31733	4.67955	5.15305	4.54992	4.88125	4.94395	4.82481	4.73847	4.18789	4.605	4.37716	4.77504	4.78221	4.76964	5.0832	4.94786	5.15309	5.47125	4.93717	4.90185	4.56334	4.87079	4.42443	4.21306	4.93213	4.96649	4.60143	5.04358	4.99348	5.31751	5.15246	5.19024	5.09365	5.08327	4.87831	4.31687	3.59283	4.21006	4.60796	5.31437	4.97765	4.7575	4.86109	4.73077
OG0004369	Lthed_scf0110.1_g071820.1	Qgl_scf0110.1_g023120.1	AT2G38040.2	AT2G38040.2	IV	5.32341	5.28886	4.76361	5.27587	5.15533	5.09032	5.52776	5.96541	5.60857	5.52706	5.53967	5.40515	5.65797	5.36459	4.89544	5.36048	5.15651	5.26877	5.69098	5.68895	5.68845	5.69918	5.50044	5.51182	5.48282	5.59263	5.66044	5.4771	5.75697	5.71996	5.85481	5.94737	5.89896	5.96884	6.00506	5.7915	5.78571	5.78131	5.73949	5.8529	6.02076	5.87657	5.65528	5.35737
OG0004370	Lthed_scf0110.1_g055990.1	Qgl_scf0110.1_g036660.1	AT3G53940.1	AT3G53940.1	III	2.88421	2.92224	2.36677	2.73913	2.55493	2.9242	3.1821	3.52974	3.61271	3.32064	3.71241	3.56547	2.54812	2.92062	2.85231	3.06529	2.83935	2.95442	3.19733	3.14996	3.68564	3.42361	3.23229	3.62859	3.27623	3.71734	2.62021	2.83382	2.91502	2.97106	2.97459	2.96802	2.96412	2.69532	3.28424	3.59888	3.63773	3.65956	3.62098	3.30133	2.64192	3.02118	2.64766	2.40903
OG0004371	Lthed_scf0110.1_g099520.1	Qgl_scf0110.1_g000260.1	AT2G37678.1	AT2G37678.1	I	3.82841	3.79676	3.7836	4.52579	4.52929	3.90996	3.98239	4.67344	4.51435	4.93033	4.48695	3.91969	3.78828	4.056	4.26644	3.94981	3.32709	3.16628	4.17031	4.06185	4.56084	4.83269	5.46731	5.42363	3.96287	4.41526	3.98885	4.0023	4.24259	4.07414	4.21627	4.29227	4.09382	4.47918	4.98075	4.43556	4.20411	4.04442	4.41609	4.37105	4.3941	3.67434	4.13345	4.48105
OG0004373	Lthed_scf0110.1_g095640.1	Qgl_scf0110.1_g004690.1	AT5G02740.1	AT5G02740.1	III	5.75852	5.55439	5.42867	5.42077	5.66123	5.17565	5.72779	5.20296	5.18894	4.69655	5.00215	6.13228	5.45769	5.80495	5.37403	5.13849	5.25885	5.69251	5.42528	5.13085	4.74442	4.18939	4.58348	4.07709	4.58117	5.87944	5.18452	5.41888	5.21451	5.33599	5.15869	5.41407	5.31772	4.98312	3.8506	3.78667	4.0422	4.29801	4.41784	5.47287	5.2802	4.85323	4.89422	4.86122
OG0004374	Lthed_scf0110.1_g095620.1	Qgl_scf0110.1_g004710.1	AT3G58090.1	AT3G58090.1	V	5.23378	5.08942	5.09328	5.19219	5.10921	5.56555	5.55855	5.34749	5.75806	6.2323	5.75462	5.44871	4.82551	4.72154	5.11691	5.10734	5.74297	5.1857	5.18519	5.4252	5.59638	5.59927	6.07844	5.50119	5.51216	5.14964	4.72508	5.16168	4.9697	5.0405	5.19607	5.13411	4.92864	5.14834	4.55122	4.85627	5.87219	5.46734	5.43346	4.71441	4.64673	4.80441	5.07966	5.31168
OG0004378	Lthed_scf0110.1_g092110.1	Qgl_scf0110.1_g008330.1	AT5G03280.1	AT5G03280.1	V	4.97111	5.09742	4.93291	4.99646	5.0248	5.10957	5.12907	5.19876	5.47609	5.63832	5.41671	4.7596	5.04098	5.05748	4.99757	4.95558	5.10155	4.94883	5.15651	5.2367	5.52556	5.54946	5.72854	5.84095	5.18929	4.98941	5.14419	5.21647	5.28905	5.25522	5.60234	5.25873	5.57267	5.28181	5.40607	5.5907	5.61886	5.31812	5.10892	5.10837	5.21349	5.10125	5.22159	5.21502
OG0004379	Lthed_scf0110.1_g091240.1	Qgl_scf0110.1_g008820.1	AT2G37020.3	AT2G37020.3	III	5.79435	5.78159	5.49526	5.86891	5.4425	5.56325	5.91469	5.40116	5.21588	5.10835	5.42575	6.51369	6.17207	5.75952	5.58445	5.42959	5.34226	5.80224	5.95957	5.87358	5.7342	5.26611	5.34165	4.98774	5.44368	6.30393	5.89853	5.99474	6.03374	5.8813	5.79795	5.80384	5.7407	5.53317	4.99553	4.86052	5.10277	5.39627	6.10474	6.34393	6.28814	5.94347	5.47722	5.51144
OG0004381	Lthed_scf0110.1_g028420.1	Qgl_scf0110.1_g058570.1	AT3G56950.1	AT3G56950.1	IV	5.3408	5.02118	5.24485	5.29724	5.0161	4.88982	5.04568	5.87664	5.8386	5.25414	5.40551	5.65366	5.51554	5.47113	5.67159	5.32951	4.92553	5.33447	5.03502	5.35801	5.73985	5.72501	5.54887	6.35391	5.24066	5.8827	5.54104	5.33411	5.2678	5.33937	5.02246	4.95531	4.61245	5.17486	5.82102	6.27054	6.37817	6.2757	5.62913	5.54659	5.20725	4.93682	4.63737	5.02199
OG0004383	Lthed_scf0020.1_g166800.1	Qgl_scf0030.1_g016320.1	AT2G31180.1	AT2G31180.1	IV	1.03535	0.250024	0.469046	0.220329	0	0	0.245184	0.264457	0	0.448957	1.52877	0	0.230208	0.133042	0	0.95111	0.928742	1.09672	0.580747	0.591179	0.253552	0.0558022	0	0	0.0458781	0.0939233	0.594391	1.10555	1.0396	1.03885	0.557436	0.742509	1.13745	0.249483	0.0638748	0	0	0	0.530958	0.29581	0.79052	1.3142	1.54116	2.03823
OG0004385	Lthed_scf0020.1_g160900.1	Qgl_scf0030.1_g020540.1	AT1G11480.1	AT1G11480.1	V	4.78888	4.71814	4.65686	5.1049	4.62422	4.74611	4.86351	5.01282	4.97975	5.0605	4.90594	5.31082	4.82096	4.24086	4.51991	4.54854	4.62844	4.58577	4.82939	4.72386	5.00497	4.98709	5.08503	5.05624	4.68179	5.18839	4.93065	4.58189	4.61344	4.63298	4.57756	4.6751	4.56491	4.53764	4.53369	4.78578	4.85835	4.85963	4.33688	4.76951	4.59738	4.47393	4.14188	4.40177
OG0004386	Lthed_scf0020.1_g130300.1	Qgl_scf0030.1_g047330.1	AT1G31310.1	AT2G35640.1	I	1.98225	2.98405	2.66515	2.51024	2.43316	2.54301	2.40003	1.62593	0.322632	0.985442	1.95461	2.95116	1.43067	1.61133	1.37018	1.93931	1.62935	2.19875	2.74573	2.65378	1.09117	0.930237	0.934517	0.120543	1.43188	1.96364	1.43324	0.840882	1.50132	2.27264	1.48687	1.81879	1.10955	1.1851	0.209555	0	0.0451368	0.114404	1.25244	1.47722	1.00066	1.41158	0.632824	1.20392
OG0004387	Lthed_scf0020.1_g130560.1	Qgl_scf0030.1_g047120.1	AT4G20400.1	AT4G20400.1	IV	2.41572	2.50328	2.64546	2.99301	2.51207	2.46543	2.41081	3.46896	3.62232	3.47561	3.04863	2.32246	2.6085	2.42252	2.74745	2.68832	2.42244	2.41747	2.86083	2.80104	3.46288	3.4731	4.00502	4.19986	3.3431	3.10066	2.77509	2.86782	2.84623	2.55749	3.36733	2.98497	2.57228	3.51824	4.01973	3.76361	3.49889	3.27944	3.25814	2.93946	2.78096	3.30473	3.00876	3.13238
OG0004390	Lthed_scf0020.1_g116430.1	Qgl_scf0030.1_g063140.1	AT2G34480.2	AT2G34480.2	III	8.35178	8.16145	7.52581	8.15496	8.17654	7.99085	8.87629	8.91146	9.03644	8.71134	8.72859	9.59362	8.84759	8.17868	7.91727	7.80904	7.88769	8.11544	8.74192	8.30801	8.52909	8.48237	8.44254	8.43135	8.32949	9.3128	8.23632	8.95891	8.56371	8.63583	8.68099	8.49553	8.50922	8.67432	8.6012	8.72829	8.67469	8.70634	8.79548	9.60546	8.84301	8.14316	7.83781	8.08002
OG0004391	Lthed_scf0020.1_g117690.1	Qgl_scf0030.1_g061750.1	AT2G34560.2	AT2G34560.2	III	4.06708	3.90246	4.19144	3.59087	3.72812	3.68482	3.781	3.78162	3.6468	3.48963	3.50935	4.48482	4.07159	4.31266	3.87225	3.82161	4.02655	4.07266	3.76448	3.95708	3.71913	3.8588	3.7112	3.003	3.58915	4.32038	3.88233	4.08961	4.18471	4.2986	4.20599	4.27721	4.09359	4.19231	4.23412	3.97808	3.51283	3.92898	4.13467	4.3873	4.06632	4.02271	4.01197	4.17814
OG0004393	Lthed_scf0020.1_g120450.1	Qgl_scf0030.1_g056580.1	AT2G38960.1	AT2G38960.1	I	3.55617	3.28435	3.52373	3.429	3.31882	3.65476	3.41421	3.99097	4.25503	3.71067	3.87439	3.65567	3.61398	3.43428	3.40968	3.59833	3.36372	3.43097	3.53815	3.71335	4.09721	4.18368	3.85284	4.17386	3.66018	4.44585	3.65166	3.55171	3.63802	3.83093	3.73627	3.92645	4.01981	3.92585	4.10566	4.23904	4.98997	4.58555	4.18234	3.65511	3.82792	3.83699	3.85862	3.49591
OG0004397	Lthed_scf0020.1_g126180.1	Qgl_scf0030.1_g049850.1	AT1G30500.2	AT1G30500.2	I	5.77632	6.19949	6.84995	6.4579	7.2019	7.08435	6.95365	6.29015	6.19982	5.82718	5.49807	5.17549	5.4509	6.02913	6.39178	6.54472	6.70937	7.14951	6.62903	6.53975	6.08733	5.95456	5.84594	5.73702	5.49189	4.86554	5.1781	5.25565	5.62258	6.07145	6.56966	6.73256	6.74283	6.33713	5.58588	5.15726	5.00003	4.52873	4.80657	4.78306	5.02989	5.65804	6.25835	6.56418
OG0004399	Lthed_scf0020.1_g142690.1	Qgl_scf0030.1_g037130.1	AT2G35760.1	AT2G35760.1	III	5.64798	5.70332	7.06338	6.39971	6.96589	7.56376	7.35113	6.96084	6.62217	7.07231	6.68729	5.91278	4.77538	6.05419	6.06412	6.70595	7.94221	7.00145	6.74044	7.26288	7.34732	7.57252	7.43777	6.56911	6.67464	5.06392	5.45808	6.25311	6.38487	6.4172	6.78457	6.52102	7.01048	6.33551	6.05187	6.07356	5.81406	6.45828	5.88479	5.80977	5.32446	5.30608	5.7392	6.45937
OG0004401	Lthed_scf0020.1_g145900.1	Qgl_scf0030.1_g033470.1	AT3G01435.4	AT3G01435.4	IV	4.15725	3.98056	3.26013	4.27247	3.10898	3.36884	3.874	3.64239	4.65526	5.42756	5.13114	4.55072	3.44056	2.90546	3.22319	3.45199	3.48738	4.0511	3.85547	4.32097	4.74795	5.43481	5.6832	6.12191	4.8149	4.48788	3.94799	4.1085	4.01136	3.9125	4.0798	4.45759	3.77081	4.37989	4.97885	5.23424	5.1469	4.84707	4.89141	4.1718	3.31757	3.95545	3.74497	3.76632
OG0004403	Lthed_scf0020.1_g151120.1	Qgl_scf0030.1_g028630.1	AT1G11840.6	AT1G11840.6	V	8.91898	9.16704	10.3909	8.9289	9.864	10.14	9.61853	9.49563	9.74832	9.63821	8.93903	8.70711	8.72042	9.16045	9.66038	9.18767	10.7128	10.1016	8.99153	9.38595	9.39305	9.90906	9.67078	9.74287	8.98432	8.52056	8.72005	8.63015	8.66852	9.32767	8.85469	9.31024	9.45507	9.19246	9.56479	9.36395	9.10818	9.10627	8.98931	8.71476	8.92409	8.61223	9.41871	9.22474
OG0004404	Lthed_scf0020.1_g151840.1	Qgl_scf0030.1_g028210.1	AT1G61900.1	AT1G61900.1	III	4.95733	4.9992	5.56594	5.18874	5.07643	5.4351	5.28892	4.55964	3.81815	4.03799	4.47982	5.09348	5.03334	4.73547	4.63002	5.03017	5.41976	5.47243	5.27667	4.80182	4.39066	4.18537	3.65616	2.59688	4.54025	5.12088	4.59053	3.88264	4.27564	4.48238	4.2244	4.33487	4.10986	3.60972	3.24654	3.58358	3.69958	4.32263	3.88938	4.09228	3.95988	4.16948	3.87031	3.80413
OG0004406	Lthed_scf0020.1_g153330.1	Qgl_scf0030.1_g027640.1	AT1G61870.1	AT1G61870.1	I	4.11873	4.20049	3.81504	4.51923	4.47996	3.73334	4.42375	4.52956	4.76116	3.87352	4.3214	5.06005	4.53837	4.15919	3.79708	4.13055	3.92368	4.43397	4.5739	4.467	4.69507	4.13426	4.22033	4.07772	4.34399	4.92703	4.20376	4.41374	4.2466	4.23113	4.36563	4.25013	4.15949	4.23388	3.83007	3.7218	3.6912	3.63905	4.30936	4.53362	4.4334	4.05772	3.86201	3.89776
OG0004409	Lthed_scf0080.1_g078550.1	Qgl_scf0070.1_g034810.1	AT1G10180.1	AT1G10180.1	III	4.05759	3.57093	4.18186	4.32904	4.32407	4.3564	4.73454	4.62231	4.37544	4.43361	4.20913	4.39904	4.65302	4.41439	4.30958	4.55492	4.82204	4.58071	4.78942	4.99149	4.77324	5.0168	4.38799	4.61697	4.91356	4.92456	4.52983	4.92964	4.90838	5.06988	4.9957	5.28141	5.44402	5.73505	5.68349	5.84977	6.10564	5.98493	5.36068	5.09287	4.85571	5.08508	4.94167	4.93498
OG0004411	Lthed_scf0020.1_g104260.1	Qgl_scf0030.1_g078850.1	AT4G18640.1	AT5G45840.1	I	3.17486	3.00113	2.45913	2.63529	2.5573	2.66166	2.95655	3.18512	2.48072	1.42066	1.63776	2.22102	2.25798	2.64233	1.76635	2.42754	2.01722	2.86024	2.93793	2.99895	2.23039	1.94186	0.949604	1.5758	1.36804	1.98368	2.79332	1.99276	2.69023	2.69333	2.12337	2.03117	2.56334	1.82063	1.74013	1.34973	1.01778	1.18408	1.29383	1.66145	2.6148	2.45782	2.0585	1.52384
OG0004414	Lthed_scf0020.1_g101020.1	Qgl_scf0030.1_g081210.1	AT4G18570.1	AT4G18570.1	I	5.61436	5.40841	5.16528	5.81384	5.13683	5.04749	5.36178	4.76439	3.62314	3.91416	5.07173	5.94614	4.97391	5.20618	4.51861	5.01885	4.5119	4.9804	5.52954	4.96791	4.57705	3.84791	3.34366	2.52182	4.48572	4.84202	4.73352	4.6983	5.36917	5.40937	4.64293	3.87282	4.10677	3.6899	3.36761	2.20914	2.15933	3.05627	4.1749	5.0225	4.79933	4.88208	3.91997	4.23745
OG0004415	Lthed_scf0020.1_g092500.1	Qgl_scf0030.1_g089410.1	AT4G28500.1	AT4G28500.1	I	5.60113	5.11751	4.77511	5.01282	4.71064	4.75696	4.61875	4.95863	4.02401	4.09511	3.60295	2.78485	3.34653	4.44265	4.9597	5.15217	4.74045	4.81698	4.97848	5.16929	4.76437	4.34636	3.98892	4.36896	3.8045	3.01595	4.93606	3.5707	4.31775	4.43318	4.23469	4.22736	4.65929	4.47114	4.48104	4.23688	3.70106	3.72335	3.11549	2.67952	3.60576	4.81876	4.14079	3.91512
OG0004419	Lthed_scf0110.1_g029380.1	Qgl_scf0110.1_g057260.1	AT5G65180.1	AT5G65180.1	III	5.59845	5.79298	5.42778	5.83295	5.86988	5.84971	5.83783	5.8597	6.0715	6.18619	5.98946	5.65222	5.45215	5.89441	5.77261	5.90452	5.9626	5.66539	5.93457	5.93109	5.88455	6.27154	6.19885	6.08644	6.04379	5.49003	5.49295	5.65458	5.89813	5.86583	6.0678	5.9225	5.99102	6.04324	6.26461	6.28502	6.09125	5.932	5.78992	5.8627	5.70047	6.00521	5.96596	6.01394
OG0004420	Lthed_scf0110.1_g029270.1	Qgl_scf0110.1_g057330.1	AT5G17910.3	AT5G17910.3	I	2.90838	2.78153	3.02637	2.95778	3.17436	3.04335	3.07914	3.14644	3.12846	2.98312	3.02889	2.60132	2.82875	2.97409	3.12376	3.14966	3.06506	2.98131	3.1849	3.26238	3.20634	3.21966	3.13123	2.94779	3.05289	2.83655	2.8515	2.81639	3.20823	3.17241	3.22035	3.12967	3.39497	2.99477	2.81158	2.77879	3.28576	3.27342	3.44802	3.15557	3.0323	2.85346	3.11176	2.75521
OG0004423	Lthed_scf0110.1_g021910.1	Qgl_scf0110.1_g063860.1	AT5G05140.1	AT5G05140.1	IV	4.29501	3.9464	4.73638	4.30998	4.30923	4.31748	3.97285	4.70472	5.20374	5.26045	4.97665	3.98707	4.28081	4.32162	4.59839	4.48815	4.35748	4.14062	3.99197	4.40724	4.49149	5.05097	5.78213	5.95589	4.89487	4.20838	4.63519	4.78914	4.32913	4.58724	4.03541	4.02975	4.13196	4.72942	6.10839	6.40767	5.85875	6.15308	5.22334	4.79079	4.11895	4.6485	4.30721	4.25851
OG0004424	Lthed_scf0110.1_g020160.1	Qgl_scf0110.1_g065490.1	AT3G56750.1	AT3G56750.1	I	3.07174	3.50282	3.28841	3.23128	3.45297	2.89585	3.33137	3.09321	3.25091	1.92588	2.49337	3.22027	3.61881	3.16853	3.02099	3.17535	3.13616	3.29397	3.34817	3.43372	2.77313	2.64101	2.15533	1.95049	2.4894	3.34292	2.94451	3.31601	3.2739	3.21015	3.36136	3.38287	3.45023	3.12481	2.34228	2.14705	1.94284	2.25435	2.8054	2.99199	3.47182	3.25687	3.12834	2.90388
OG0004425	Lthed_scf0110.1_g019090.1	Qgl_scf0110.1_g067010.1	AT3G12250.7	AT3G12250.7	IV	5.57448	5.15588	5.49012	5.36249	5.20598	5.23868	5.39797	5.71485	5.97764	6.29507	6.07719	5.11609	5.35649	5.658	5.46435	5.5938	5.52358	5.54129	5.45111	5.39187	5.85652	6.16202	6.32631	6.64679	5.89156	5.11882	5.29086	5.77484	5.77858	5.73845	5.78419	5.67212	5.67309	5.83901	6.57552	6.97722	7.10267	6.69201	5.85053	5.64643	5.34452	5.7921	5.7542	6.04371
OG0004426	Lthed_scf0110.1_g013550.1	Qgl_scf0110.1_g073380.1	AT5G04060.1	AT5G04060.1	I	3.51387	3.57644	3.44511	3.66295	3.26124	3.69656	3.77257	3.42845	3.02051	3.10392	2.96435	3.67095	4.139	3.60761	3.58704	3.63535	3.80154	3.7634	4.13996	3.9444	3.68142	3.53763	3.07687	2.99542	3.21248	4.08266	4.10826	3.70515	3.95509	4.11156	4.22459	4.14217	4.22574	3.77191	3.01311	2.65173	2.65001	2.65708	2.98829	3.65716	4.36286	4.08144	3.92672	3.828
OG0004428	Lthed_scf0110.1_g002360.1	Qgl_scf0110.1_g081490.1	AT2G41680.1	AT2G41680.1	II	3.42766	3.00209	2.95212	3.40247	3.07539	3.06922	3.01205	3.81589	3.9767	3.53321	3.70935	3.91315	3.65919	3.41277	2.78579	2.96087	2.83488	2.80922	3.35262	3.21906	3.75182	3.51073	3.73282	3.7604	3.73757	3.92104	3.41431	3.31995	3.20472	2.71678	2.87241	3.15188	2.63932	3.887	4.1345	3.8047	3.7294	3.83609	4.34035	4.09243	3.75308	3.43667	2.83019	2.97257
OG0004429	Lthed_scf0110.1_g001730.1	Qgl_scf0110.1_g082510.1	AT2G41740.2	AT2G41740.2	I	5.30964	4.99817	4.92532	5.28547	5.13538	4.95588	4.94167	4.82811	4.76118	4.75271	4.42206	5.12502	5.36156	5.20562	5.0586	5.0502	4.99931	4.9026	5.02633	4.96358	4.65162	4.77185	4.77351	4.82364	4.59672	5.19594	5.05978	4.88772	5.21415	5.36353	5.2235	5.18532	5.11348	4.85416	4.93969	4.73005	5.09403	4.67297	4.84847	5.0308	5.48643	5.0826	5.00807	4.74107
OG0004430	Lthed_scf0110.1_g040230.1	Qgl_scf0110.1_g049100.1	AT3G57550.2	AT3G57550.2	I	5.80994	5.31349	5.36398	5.47733	5.26311	5.22433	5.47357	5.73416	5.57351	4.73155	4.6334	5.38162	5.66929	5.50326	5.16223	5.39134	5.05226	5.17611	5.65979	5.43542	5.59382	5.06128	4.54975	4.74132	4.90739	5.58538	5.82344	5.52769	5.21872	5.15607	4.87865	5.06338	4.67759	5.32484	5.83529	5.48713	4.85823	4.86365	4.55924	5.05503	5.49241	5.13816	4.91803	4.83566
OG0004431	Lthed_scf0110.1_g041700.1	Qgl_scf0110.1_g047730.1	AT3G20860.1	AT3G20860.1	I	4.78598	4.66497	4.45269	4.51513	4.4154	4.38506	4.28677	4.58204	4.06835	4.37858	3.95603	3.49869	4.46195	4.73565	4.40213	4.49613	4.38409	4.33342	4.45903	4.53576	4.37805	4.50354	4.25481	4.07808	4.00985	3.49338	4.96512	3.87928	4.70902	4.61714	4.20817	4.27435	4.45652	4.38502	4.55789	3.90165	3.64932	3.75769	4.20822	3.92624	4.68424	4.87969	4.48084	4.10115
OG0004434	Lthed_scf0110.1_g047360.1	Qgl_scf0110.1_g044610.1	AT3G12120.2	AT3G12120.2	IV	7.06892	7.50371	7.6101	7.24781	7.69331	7.88796	8.21777	7.56385	7.83187	7.55152	7.54158	7.89377	7.32778	7.60576	7.51257	7.09825	7.85714	7.65333	7.40516	7.71057	7.43013	7.44539	6.90395	7.49207	7.6603	7.67001	6.94293	7.42655	7.62533	7.85456	7.92038	8.10189	8.44304	8.22218	8.16771	8.55038	8.52571	8.65365	7.57289	7.63521	7.0481	6.63809	7.40605	7.52683
OG0004435	Lthed_scf0110.1_g048260.1	Qgl_scf0110.1_g044160.1	AT2G42040.1	AT2G42040.1	IV	2.8424	3.12758	3.02547	3.4074	3.13081	2.82489	2.60912	3.03858	3.3162	3.20659	3.05806	2.60515	3.19517	2.79899	2.75784	2.8391	2.83911	2.6776	2.81089	2.91904	2.57821	3.18575	3.21989	2.83961	3.21746	3.50201	3.36066	3.22129	3.2248	3.27235	3.19659	3.14468	2.95849	3.00684	2.91485	3.31416	3.09193	3.43671	3.56833	3.50162	3.34339	3.38322	3.04271	3.58999
OG0004437	Lthed_scf0110.1_g050920.1	Qgl_scf0110.1_g041400.1	AT3G58470.1	AT3G58470.1	III	4.16481	4.33074	3.64612	4.45356	4.16998	4.02947	4.23279	5.13761	4.97431	4.80812	4.7582	5.17014	5.01302	4.37286	4.32176	3.91634	3.87678	3.91189	4.91575	4.83151	5.18033	5.31997	5.37534	5.36899	4.90462	5.23714	4.72253	4.41458	4.12399	3.92597	3.78301	3.96601	3.97156	4.60292	4.48372	4.08274	3.48225	3.67928	4.50832	4.42864	4.30148	4.03991	3.96284	3.45295
OG0004438	Lthed_scf0110.1_g051900.1	Qgl_scf0110.1_g040710.1	AT2G35840.4	AT2G35840.4	IV	5.90813	5.2744	5.65028	5.24432	5.66849	5.63952	6.21345	6.46119	6.36729	6.58963	6.21887	5.57505	5.18624	5.72307	5.84875	5.50703	5.82457	5.57883	5.60582	5.89372	5.83083	6.93194	6.08369	6.45497	6.11671	5.40235	5.60648	5.73281	5.60429	5.71035	5.43125	5.98833	5.98129	6.81362	7.24933	7.28796	7.13354	6.97945	5.96333	5.97794	5.82459	5.961	6.01965	5.53657
OG0004440	Lthed_scf0110.1_g076920.1	Qgl_scf0110.1_g018660.1	AT3G15040.1	AT3G15040.1	V	5.51225	6.42211	7.62517	6.0527	7.38415	7.2372	6.42738	4.82951	5.45141	4.07107	4.56272	5.31811	4.61865	5.16831	6.05624	6.18411	7.22245	6.51485	5.04015	6.02005	4.65551	4.17777	5.01756	4.28942	4.25785	3.84195	4.58326	5.57282	3.98502	4.69725	4.6555	5.03539	5.76712	4.60612	3.42974	3.5158	3.72504	4.53348	3.81946	3.97866	3.61223	3.00083	3.66091	4.56933
OG0004441	Lthed_scf0110.1_g077140.1	Qgl_scf0110.1_g018500.1	AT5G06140.1	AT5G06140.1	V	4.81634	4.73918	4.81969	4.66758	4.64978	4.86336	5.18822	5.09793	5.28169	5.19404	5.31322	5.3398	4.95239	4.98653	4.8404	4.87669	4.7999	4.77306	5.03572	5.21452	4.9905	5.08014	5.28947	5.20729	5.03723	5.23636	5.02343	5.11951	5.02097	5.08039	5.26909	5.28437	4.9729	5.4192	5.14478	5.17335	5.42302	5.26671	5.42833	5.10651	5.07003	5.21765	5.28826	5.21009
OG0004443	Lthed_scf0110.1_g078140.1	Qgl_scf0110.1_g017750.1	AT2G36230.1	AT2G36230.1	III	2.88114	2.71355	3.3262	2.41443	3.03711	2.60014	2.85509	3.08378	2.67128	2.57566	3.12265	3.7066	3.04831	2.5676	2.57967	2.75066	2.7943	2.90974	2.60011	2.54499	2.91242	2.39708	2.27532	2.27305	2.56597	3.58131	3.1688	2.99487	3.05817	3.22433	2.67547	3.10788	2.76664	3.01382	2.43018	2.35416	2.00162	2.46875	3.44099	3.85607	3.4527	2.85083	2.6831	2.43575
OG0004445	Lthed_scf0110.1_g010860.1	Qgl_scf0110.1_g075160.1	AT5G03960.1	AT5G03960.1	I	1.75242	1.28426	1.09318	1.25504	1.43374	0.612365	1.35555	1.16399	0	0.34935	0.304753	2.34041	2.92729	1.53377	1.58359	1.18538	1.10485	0.99346	1.73864	1.42451	1.16211	0.394047	0.124229	0.0750312	0.845046	2.82976	2.69187	1.53946	2.1895	1.90181	1.48972	1.93758	1.38556	0.859419	0.937608	0.0412818	0.416947	0.342387	1.66006	2.65184	3.11546	2.93021	2.00172	1.93234
OG0004458	Lthed_scf0020.1_g138980.1	Qgl_scf0030.1_g040400.1	AT4G34160.1	AT5G67260.1	III	0.114158	0.651487	0.412625	0	0	0	0.309584	0	0	0	0	0	0.0995608	0.247078	0.226868	0.42785	0.68532	0.695723	0.42053	0.237613	0	0	0	0	0	0.0410717	0.21137	0.268634	0.125924	0.339209	0.23208	0.381233	0.486881	0	0.0554726	0	0.214605	0.0526582	0.138316	0.129843	0.0911315	0.202456	0.407338	0.555609
OG0004462	Lthed_scf0020.1_g113910.1	Qgl_scf0030.1_g065550.1	AT1G29850.1	AT1G29850.1	V	6.3614	6.12459	5.70934	6.29211	6.58028	5.96476	6.5704	6.51862	6.17574	6.44273	6.15441	6.34819	6.24683	6.63723	6.46009	6.09619	6.20703	6.20623	6.25481	6.1628	6.41375	6.22564	6.25541	6.23848	6.12987	6.43258	6.24108	6.04531	5.92356	5.8947	5.66105	5.96939	5.84502	6.167	5.86674	6.00478	6.07617	5.85619	6.02205	6.59649	6.03533	5.78532	5.82822	6.35027
OG0004463	Lthed_scf0020.1_g113310.1	Qgl_scf0030.1_g065900.1	AT5G46410.2	AT5G46410.2	IV	4.10087	4.34052	4.77725	4.0347	4.02389	4.03689	4.25481	4.42077	4.71173	5.06745	4.79698	3.94892	4.30627	4.66887	4.69953	4.60925	4.61493	4.57242	4.58995	4.38567	4.63099	4.62111	4.87874	5.11636	4.8876	3.99204	4.38007	4.75402	4.25138	4.00556	4.37153	4.04412	4.39253	4.59086	5.66205	6.02543	5.67702	6.20601	4.81286	4.37011	4.14169	4.45492	4.46333	4.6707
OG0004464	Lthed_scf0020.1_g110880.1	Qgl_scf0030.1_g067540.1	AT4G18975.2	AT4G18975.4	II	2.19234	2.27763	2.19792	1.83367	1.50964	2.00974	2.46829	2.2991	1.92345	2.08228	2.32148	2.3507	2.33588	2.41483	2.58222	2.66301	2.62961	2.65659	2.01242	2.63483	2.32498	1.94995	2.52384	1.7762	2.44934	2.10054	2.67148	2.79361	2.84785	2.9538	2.8926	2.81256	2.46563	2.71466	1.73662	1.72857	2.29384	2.23256	3.06205	2.60747	2.6817	2.69838	2.94145	2.8337
OG0004469	Lthed_scf0020.1_g170110.1	Qgl_scf0030.1_g013910.1	AT4G21540.1	AT4G21540.1	II	3.0822	2.81297	3.58551	3.10332	2.82092	3.05644	3.22997	3.56934	3.15167	2.80491	3.17089	3.00464	3.24497	3.77973	3.54669	3.13934	3.16865	3.26559	3.28944	3.1213	3.02325	2.91673	3.24325	3.05376	3.07107	2.847	3.28733	3.22499	3.2589	3.42073	3.05887	3.33469	3.13221	3.42969	2.98368	3.26453	3.21851	3.39047	2.83173	3.05427	3.29831	3.37239	3.49045	3.42592
OG0004471	Lthed_scf0110.1_g029490.1	Qgl_scf0110.1_g057180.1	AT5G17700.2	AT5G17700.2	I	4.49862	4.66574	4.65672	4.49232	4.64943	4.89246	4.81543	4.60726	4.76266	4.91889	4.83451	4.84584	4.46243	3.98161	3.6028	4.65854	4.75372	4.96857	4.99589	5.04763	4.56593	4.90532	4.21964	3.87765	4.79766	4.81604	4.29253	3.43595	3.80082	3.598	4.09431	4.19955	4.32173	4.83105	5.04904	4.65889	3.78678	4.27197	4.6381	4.55763	3.49832	2.93048	3.18835	3.72629
OG0004472	Lthed_scf0110.1_g030260.1	Qgl_scf0110.1_g056710.1	AT1G08710.1	AT1G08710.2	IV	2.76985	2.73926	2.91058	2.72377	2.55622	3.18263	3.21577	3.54668	3.25991	3.26587	3.10841	2.94216	2.53385	2.45987	2.91712	2.95982	2.76509	2.75993	2.7444	2.90655	3.27981	3.08529	3.38558	3.44363	2.98034	2.78301	2.6513	2.66302	2.83996	2.9347	2.94583	2.75193	3.06192	3.38919	2.91556	3.04135	3.59376	2.90366	3.63982	3.12235	2.95133	3.00538	3.20511	3.15724
OG0004473	Lthed_scf0110.1_g032880.1	Qgl_scf0110.1_g054350.1	AT5G39890.1	AT5G39890.1	V	3.35105	2.80107	3.65098	5.30255	4.18034	3.78663	3.74942	3.45008	3.72331	3.5378	3.26384	4.50523	3.4505	3.27465	4.77604	3.88437	2.87018	3.49914	4.35509	4.36161	3.95655	3.75548	4.16702	4.45655	3.48564	4.32169	3.62744	2.45311	2.78513	4.67309	2.84214	3.03089	3.28631	3.4321	4.25929	3.2226	3.43793	3.12735	3.8939	2.76201	2.78017	2.56498	3.40946	4.31594
OG0004474	Lthed_scf0110.1_g089340.1	Qgl_scf0110.1_g009990.1	AT5G03420.1	AT5G03420.1	II	3.31599	2.99404	3.37076	3.77129	3.45971	3.32905	3.40246	3.14003	3.24413	3.83714	3.54385	3.16536	3.34669	3.08114	3.66223	4.05106	3.89377	3.58648	3.61646	3.60304	2.99351	3.62389	3.25257	3.10105	3.73344	2.71119	3.56401	2.61519	2.85482	3.2386	3.09835	3.3507	3.23823	2.77471	2.59258	2.50921	2.79777	2.67441	2.72626	2.8809	3.16364	2.76349	3.20288	3.08864
OG0004475	Lthed_scf0110.1_g095850.1	Qgl_scf0110.1_g004390.1	AT3G53500.2	AT3G53500.2	IV	6.19297	6.39868	5.75439	6.9989	6.47284	5.95895	6.62415	7.14441	7.34184	7.04004	7.09651	7.27593	6.45821	6.36206	6.28104	6.26196	6.22074	5.89358	6.89637	6.66075	7.48675	7.30824	7.28311	7.60094	6.86181	7.19421	6.46344	7.13694	7.09581	6.8465	7.15498	7.0212	6.60273	7.23185	7.41407	7.56052	7.67106	7.19985	6.95897	7.51034	7.03336	6.91254	6.56891	7.2653
OG0004477	Lthed_scf0110.1_g097680.1	Qgl_scf0110.1_g001900.1	AT3G53710.3	AT3G53710.3	I	5.99701	5.75892	5.49449	6.11662	5.63868	5.98798	6.19384	6.31193	6.15042	5.84073	5.83777	6.36972	6.4756	6.03765	5.71905	5.7041	5.65678	5.97685	6.17971	6.04459	6.08735	6.01853	6.06564	6.04662	5.67326	6.22337	6.48425	6.24499	6.53983	6.25424	6.37476	6.13674	6.16036	6.14648	5.64024	5.81822	5.88676	5.06707	5.14829	6.38914	6.40151	6.12084	5.58307	6.14288
OG0004479	Lthed_scf0110.1_g069170.1	Qgl_scf0110.1_g025270.1	AT5G01260.3	AT5G01260.3	V	4.03323	4.21726	4.61519	4.69475	4.48747	4.61792	4.83865	5.69307	6.45236	6.18477	5.17412	3.60271	4.34815	4.96458	4.71979	4.84898	4.96283	4.82388	5.21879	5.4026	6.51487	6.56409	6.40264	6.78134	5.12871	3.70179	4.57512	4.60574	4.9391	5.11139	5.1832	5.35655	5.50837	5.52608	6.77979	6.65576	6.35582	6.5463	5.80861	4.38811	4.85782	4.86335	5.50938	5.39802
OG0004480	Lthed_scf0110.1_g060620.1	Qgl_scf0110.1_g032580.1	AT5G43180.1	AT5G43180.1	I	0.300276	1.0247	1.11566	0.671308	0.578335	1.91475	1.54326	0.98463	0.203305	0	0	0.438508	0.599593	1.70301	1.31003	0.657196	0.107233	1.0914	0.536532	0.839751	1.02173	0.412608	0	0.0814394	0.427225	0.734105	0.926821	1.74149	1.54945	1.00944	0.382332	1.10411	1.47724	0.556081	0.816209	0.273357	0.500505	0.859156	1.06344	1.87261	0.534984	1.35105	1.66777	1.11593
OG0004483	Lthed_scf0070.1_g009970.1	Qgl_scf0080.1_g008580.1	AT1G67580.2	AT1G67580.2	II	4.28922	4.65016	4.38698	4.53729	4.38271	4.52114	4.08327	4.4891	5.31305	5.10228	4.96433	4.03645	3.78549	4.14843	4.53807	4.55966	4.45695	4.39022	4.34269	4.41747	4.81974	4.74411	5.28543	5.34112	5.18467	4.07276	4.09276	4.31509	4.07814	4.0504	4.35493	4.27549	4.02869	4.62861	5.03605	5.09177	5.18327	5.54322	4.67944	3.83596	3.72666	4.17792	4.51936	4.47418
OG0004485	Lthed_scf0070.1_g023190.1	Qgl_scf0080.1_g017630.1	AT5G62840.1	AT5G62840.1	II	3.55135	3.22772	3.42668	3.44905	3.53624	3.86462	3.84963	2.84245	3.22777	2.34722	3.12376	3.09313	3.03497	3.40015	3.15249	3.41726	3.40687	3.74798	3.35847	3.27435	3.01404	3.00394	2.93187	2.46149	3.1612	2.92234	3.2778	2.75133	2.59969	3.28524	2.68798	3.12787	3.12881	2.81556	2.53004	1.97121	1.38761	2.19664	2.55608	2.78784	3.14205	2.84873	2.82361	3.00479
OG0004487	Lthed_scf0070.1_g001730.1	Qgl_scf0080.1_g000330.1	AT5G07360.3	AT5G07360.3	IV	1.74457	2.31528	2.52083	2.64808	2.5603	2.65241	2.30791	1.69392	1.88313	1.74976	1.81684	2.09349	2.63438	2.94953	2.78823	3.05773	3.25959	3.12702	2.75016	2.93812	2.81971	2.75082	3.20637	3.10247	2.91443	2.82934	2.73401	3.07659	3.20793	3.08217	3.2836	3.4915	3.13544	3.47435	3.37904	3.36711	3.12888	2.89517	3.44628	3.25067	3.09928	3.33904	3.29703	3.45645
OG0004491	Lthed_scf0070.1_g036100.1	Qgl_scf0080.1_g030150.1	AT5G07810.1	AT5G07810.1	III	1.15994	1.05836	0.849508	1.28488	0.597637	0.99378	1.45507	1.11192	1.10899	1.50129	1.96697	2.55065	1.46729	1.11433	0.674371	1.09263	0.794692	1.10308	1.67964	1.26747	1.30446	1.35792	1.5179	1.51329	1.59821	2.27066	1.05249	1.48934	1.38075	1.33545	0.834849	1.12299	1.08409	1.30925	1.33625	1.46389	1.60735	1.4812	1.62349	1.7751	1.61977	1.11309	0.729375	0.710169
OG0004495	Lthed_scf0030.1_g012120.1	Qgl_scf0010.1_g179420.1	AT1G16445.1	AT1G16445.1	II	1.98414	1.79599	2.2665	1.73156	1.82715	2.00704	1.61432	2.40142	2.24442	1.12295	2.05053	2.03577	2.01215	1.51296	1.9695	1.93881	1.51709	1.86344	1.82999	1.70425	1.34677	1.34523	1.45527	1.35569	1.61183	1.76132	1.66732	1.70643	1.25616	2.2469	1.68241	1.906	2.09216	1.67772	0.913933	1.48748	1.315	1.8168	1.26357	1.39686	1.60576	1.78115	1.79933	1.7147
OG0004514	Lthed_scf0040.1_g087290.1	Qgl_scf0050.1_g049180.1	AT3G15190.1	AT3G15190.1	II	6.04703	5.79591	5.73284	6.41706	6.13282	6.0978	6.35745	6.50532	5.95558	6.62802	6.32109	6.36783	6.70694	5.99497	6.04423	5.95503	5.95391	5.95436	6.39613	6.11535	6.02462	6.10256	6.30988	5.85911	6.2401	6.04749	5.85183	6.35809	5.87685	5.98444	5.83175	6.41441	6.62292	6.31652	5.70664	5.00688	4.48121	4.64516	6.55139	6.69831	6.58665	6.04217	5.85272	6.64537
OG0004516	Lthed_scf0040.1_g104300.1	Qgl_scf0050.1_g037370.1	AT5G54310.1	AT5G54310.1	IV	5.20193	5.19478	5.41641	5.31327	5.27052	5.33529	5.54365	5.76529	5.84065	6.21822	5.99925	5.52442	5.24856	5.50181	5.33082	5.24696	5.64777	5.4002	5.49555	5.43938	5.53565	5.92318	6.06915	6.20965	5.93334	5.62891	5.23551	5.67979	5.51958	5.72134	5.75328	5.80266	5.86436	5.96752	6.41361	6.70995	6.88889	6.62801	6.0946	5.81462	5.54117	5.61021	5.68464	5.97647
OG0004517	Lthed_scf0040.1_g106690.1	Qgl_scf0050.1_g034800.1	AT4G27310.1	AT4G27310.1	IV	5.77463	5.82756	6.22392	6.63638	5.6604	5.88416	5.13503	6.58691	6.75252	7.16595	6.70128	5.31901	4.65227	5.18741	5.93976	6.29427	6.00856	6.06001	5.8816	5.85194	6.81185	6.94355	6.88325	7.16247	7.25823	6.11002	5.78992	5.12563	4.92088	5.10146	4.95378	5.06886	5.04219	5.73565	6.56419	6.12398	6.24259	6.18125	5.81806	6.07861	4.83331	6.24107	5.35672	5.93284
OG0004519	Lthed_scf0040.1_g116700.1	Qgl_scf0050.1_g025050.1	AT3G20500.1	AT3G20500.1	V	6.84586	6.97555	6.95171	6.82818	7.08461	6.92369	7.03796	6.95433	7.05675	7.23268	7.0363	5.83849	6.49862	7.51635	7.59267	7.05284	7.00568	7.02219	6.79503	7.03111	7.07329	7.27922	7.33205	7.36533	6.93115	5.84382	6.82432	7.48583	7.53567	7.07544	7.6456	7.44701	7.76372	7.5948	7.85508	8.16968	8.30548	8.18358	7.45655	6.77581	6.98143	7.33866	7.71384	7.83044
OG0004520	Lthed_scf0040.1_g119500.1	Qgl_scf0050.1_g021750.1	AT4G26900.1	AT4G26900.1	III	4.13478	4.05937	3.82207	4.17012	4.04815	3.90437	4.13878	3.9709	3.87721	4.16219	4.16595	4.24052	4.1016	3.80378	3.89245	3.70691	3.97795	4.08302	3.92589	3.89237	3.64081	3.87295	3.75735	3.48355	3.94485	4.30156	4.03272	3.89812	3.79595	4.12815	3.95161	3.98746	3.87464	3.78168	3.69318	3.93744	3.90122	3.93678	3.80861	4.42109	4.1892	3.88333	3.77691	3.73639
OG0004524	Lthed_scf0020.1_g139520.1	Qgl_scf0030.1_g040100.1	AT4G26485.1	AT4G26485.1	I	5.10567	5.05909	5.09393	5.09967	5.08517	5.47261	4.95927	4.44781	4.44154	4.77568	4.84802	4.78015	4.77688	5.48642	5.83647	5.17177	5.42066	5.23188	5.15453	5.00535	4.63947	5.03646	4.20259	4.64015	4.84044	4.13466	5.18556	3.96015	4.28843	4.28241	3.68122	4.03094	4.22071	3.52043	3.48787	3.21635	3.83332	4.10978	3.7642	4.48225	4.1879	4.13555	4.47072	3.96986
OG0004530	Lthed_scf0090.1_g001770.1	Qgl_scf0060.1_g115330.1	AT4G10110.1	AT4G10110.1	V	5.86029	6.05393	5.77873	5.92023	6.14149	5.64201	5.79885	5.1792	5.62457	5.72465	5.79662	5.12646	5.37569	5.97115	5.72998	6.04062	6.1135	5.81113	5.89221	5.62338	5.63659	5.75472	5.95328	5.85258	5.16529	5.27762	5.51943	5.71554	6.05411	6.0102	6.14221	6.0991	5.90729	5.65388	5.06697	5.58177	6.0884	5.80998	5.28916	5.39733	5.76862	5.71858	6.27328	6.3401
OG0004531	Lthed_scf0010.1_g047230.1	Qgl_scf0020.1_g045120.1	AT3G28460.1	AT3G28460.1	IV	3.62802	3.15974	2.45313	3.62359	3.05367	3.14642	3.69291	3.71108	3.86311	4.16451	4.18892	3.86088	3.7183	3.13816	3.07832	2.98278	3.14272	2.71013	3.21632	3.68192	3.85607	3.68729	3.78847	4.01196	3.99987	3.55255	3.50109	2.99929	3.10935	2.95122	3.20773	2.94952	3.20775	3.44888	3.67639	4.05815	3.95317	4.3845	4.11786	3.39127	3.34842	3.26317	3.12813	2.86499
OG0004532	Lthed_scf0010.1_g049400.1	Qgl_scf0020.1_g047750.1	AT3G01370.1	AT3G01370.1	II	2.85747	2.55967	2.34278	2.7358	2.79299	2.83408	2.87953	3.0407	2.88833	3.22252	2.92009	2.85749	3.32251	3.17893	2.57109	2.9823	3.0842	2.56398	3.0117	2.98468	3.32336	3.45382	3.4338	3.24568	3.08998	2.69929	2.83633	3.19925	3.3322	3.34733	3.5012	3.43506	3.33383	3.60558	3.48863	3.54282	3.40597	3.58175	3.40758	3.39582	3.52271	3.3718	3.11163	3.19252
OG0004534	Lthed_scf0010.1_g052820.1	Qgl_scf0020.1_g051850.1	AT5G40270.1	AT5G40270.1	III	3.24992	2.97827	3.21951	3.47408	3.22268	3.20243	3.55117	3.8838	3.89947	3.97523	3.83461	3.6193	3.73833	3.469	3.57247	3.43939	3.57152	3.22499	3.72559	3.5896	3.90224	3.88667	4.22312	3.70719	3.90485	3.61806	3.18817	3.63094	3.74079	3.38583	3.85017	3.83604	4.04348	4.09728	4.08956	3.87454	3.64854	3.9548	4.22107	3.8161	3.67582	3.82813	3.5333	3.71368
OG0004540	Lthed_scf0010.1_g099040.1	Qgl_scf0020.1_g094270.1	AT5G16040.1	AT3G02510.1	III	5.07105	5.13469	5.21102	5.06738	5.15849	5.25401	5.08912	4.74352	4.61019	5.16671	4.58139	5.47659	5.3425	5.18966	5.43889	5.16856	5.4142	5.19927	4.99797	4.93741	4.98859	5.17956	5.28414	4.86749	5.32681	5.73759	5.37517	5.00289	5.1421	5.26932	4.99426	4.94384	4.85675	4.03853	3.69721	3.33331	2.66849	3.02912	4.32231	5.27854	5.12701	4.71028	4.72621	5.06345
OG0004542	Lthed_scf0080.1_g103170.1	Qgl_scf0070.1_g009230.1	AT1G77360.2	AT1G77360.2	III	3.95366	3.80697	4.20611	3.58401	4.15851	4.15214	3.73043	3.50619	3.71223	3.42187	3.72221	3.3424	3.53965	3.53153	3.6756	3.91285	4.19798	4.13119	3.52687	3.62431	3.52477	3.31699	3.59272	3.32328	3.40689	3.00909	3.43484	3.72415	3.56716	3.41115	3.83599	3.48415	3.59456	3.50825	3.0221	2.72283	3.34656	3.29129	3.38142	3.01701	3.5913	3.69565	3.74935	3.86759
OG0004544	Lthed_scf0010.1_g072380.1	Qgl_scf0020.1_g069260.1	AT3G29760.5	AT3G29760.5	IV	2.22194	2.09656	1.74045	2.54513	1.97809	1.73001	2.55966	2.72268	3.16776	3.0731	2.88205	3.36881	2.49562	1.98757	1.6091	1.95332	1.85211	1.87946	2.73359	2.84449	3.4104	3.23729	3.3189	3.0517	2.82916	3.48687	2.52365	2.58039	2.57679	2.53008	2.67002	2.49219	2.59824	2.97763	3.02337	2.79411	3.21135	2.9791	3.48957	3.15213	2.57328	2.672	2.52264	2.43716
OG0004545	Lthed_scf0010.1_g071820.1	Qgl_scf0020.1_g068970.1	AT3G29390.1	AT3G29390.1	II	4.02641	3.71681	3.66361	3.59692	4.01336	3.73061	3.63454	3.25323	3.30794	3.5511	3.84725	3.68303	3.40048	3.5487	3.33073	3.69147	3.88207	3.62099	3.38976	3.34406	3.09333	3.39315	3.3811	2.95568	3.78694	3.41722	3.32274	3.40207	3.46439	3.31056	3.52631	3.60586	3.35709	3.63927	3.4729	3.6129	4.21844	3.86056	3.57148	3.52802	3.54886	3.33378	3.42233	3.44907
OG0004547	Lthed_scf0090.1_g032070.1	Qgl_scf0060.1_g077820.1	AT4G25280.2	AT4G25280.2	IV	2.94508	2.58928	3.3956	2.55926	2.79985	2.61896	2.91034	3.29596	3.67551	3.3383	3.34789	3.07185	2.95027	2.97957	3.10792	2.75763	2.71333	1.87255	3.09563	3.27327	3.43289	3.45888	3.38938	3.40567	3.56418	3.44212	3.17967	3.5917	3.14222	2.78428	3.14648	3.13022	3.46224	3.79361	4.11626	4.20625	4.22384	4.63427	4.27215	3.36603	3.48049	3.39015	3.43657	3.31094
OG0004549	Lthed_scf0090.1_g026790.1	Qgl_scf0060.1_g086380.1	AT4G25540.1	AT4G25540.1	IV	1.88195	1.82524	1.67756	2.27081	1.51958	1.8723	2.22764	2.18941	2.1219	2.37047	2.4962	3.62685	2.1971	2.08405	1.91419	2.40577	2.23415	2.21225	2.60882	2.37128	2.67182	2.52359	2.66072	2.45313	2.67337	2.8284	1.87682	2.0765	2.15368	2.16167	2.28651	2.27389	2.11208	2.32173	2.4573	2.52333	2.28295	2.22793	2.41943	2.24712	2.18892	2.33124	2.08681	2.01292
OG0004552	Lthed_scf0050.1_g023360.1	Qgl_scf0040.1_g029590.1	AT1G30680.1	AT1G30680.1	II	2.89107	3.3043	2.82326	3.41728	3.08072	2.72675	3.27695	3.46645	3.24244	3.21969	3.61192	3.14392	3.03161	2.95341	3.02747	3.1867	3.03215	2.75963	3.43521	3.26503	3.3765	3.35981	3.61239	3.00819	3.61467	3.21106	2.87539	3.43832	3.43402	3.16282	3.55978	3.66218	3.44257	3.56188	3.75007	3.37519	3.0012	3.50135	3.72107	3.49443	3.22913	3.39614	3.38139	3.58535
OG0004560	Lthed_scf0070.1_g090500.1	Qgl_scf0080.1_g083960.1	NA	AT1G03530.1	V	2.84558	3.16832	3.11156	3.31414	3.30004	3.1391	3.3546	3.879	3.96339	3.83877	4.00515	4.02759	3.07916	2.82693	2.74214	3.15698	3.15515	3.02818	3.28915	3.46192	4.55944	4.19409	4.36869	4.41704	3.80647	4.06195	3.21684	4.00493	3.32119	3.68803	3.78966	3.64447	3.58995	3.90307	4.32155	4.19003	3.69656	4.58108	4.50146	4.35153	3.42998	3.3836	3.41404	3.30197
OG0004561	Lthed_scf0040.1_g053970.1	Qgl_scf0050.1_g079680.1	AT2G20710.1	AT2G20710.1	V	2.13691	2.33271	2.11096	2.15275	1.90815	2.22184	2.64285	2.31617	2.30361	2.07948	2.24781	2.69185	2.15998	1.83097	1.82455	2.18009	2.30314	2.14727	2.29792	2.42779	2.61176	2.32098	2.16598	1.77751	2.14793	2.67558	1.79336	3.06037	3.07713	3.46178	3.17478	3.42878	3.62421	3.22564	2.34482	2.58826	2.52585	2.59335	3.40336	2.8762	3.10615	2.93534	3.10119	3.21728
OG0004565	Lthed_scf0080.1_g104130.1	Qgl_scf0070.1_g007470.1	AT3G43520.1	AT3G43520.1	III	5.57836	5.1354	5.16075	5.26183	5.10354	5.33618	5.15598	5.76959	5.96977	5.95763	5.72735	5.92633	5.01853	5.18353	4.99941	4.89623	5.09907	5.19716	5.09619	5.48041	5.93311	6.22378	6.45063	6.28677	5.91377	5.81787	5.41226	4.70433	4.72587	4.74096	4.8186	4.86704	4.9093	5.24867	5.91369	5.80382	6.3911	6.35325	5.6228	5.0696	4.58682	4.93888	4.80653	4.62414
OG0004566	Lthed_scf0080.1_g104480.1	Qgl_scf0070.1_g007230.1	AT4G33150.4	AT4G33150.4	V	3.25354	2.94588	2.48168	2.71043	3.03661	2.81464	3.07429	2.84838	3.09741	3.11636	3.37283	3.17427	3.12895	4.03573	3.92461	2.67193	2.56832	2.11721	2.64419	2.85544	2.25277	2.83427	3.74181	3.11872	3.19039	3.85439	3.79698	4.11118	4.06197	3.91977	3.82976	3.9745	3.74806	3.42699	3.04903	2.69673	3.48823	3.41311	3.98498	4.80522	5.12988	4.55047	4.38179	3.84225
OG0004567	Lthed_scf0080.1_g106820.1	Qgl_scf0070.1_g003780.1	AT2G05830.1	AT2G05830.1	V	5.6856	5.61504	5.52452	5.43692	5.47406	5.27561	5.23629	5.27314	5.0174	4.83805	5.29792	5.42719	5.60451	5.44293	6.00592	5.49503	5.46597	5.45915	5.18308	5.21224	5.02976	5.06697	4.95728	5.01721	5.19285	5.64756	5.69698	5.75868	5.42757	5.19519	5.18885	4.99805	5.01793	4.6052	4.39673	4.58729	4.65153	5.29786	5.4831	5.7791	5.2526	4.73541	5.01592	4.88081
OG0004568	Lthed_scf0080.1_g106840.1	Qgl_scf0070.1_g003760.1	AT3G51420.1	AT3G51420.1	II	4.60076	4.73142	3.91709	4.76023	4.36358	4.6598	4.43908	4.18357	4.53414	5.27086	5.06574	4.70398	4.69884	3.53828	4.06256	3.83831	3.86295	4.42701	4.75024	4.69295	4.11487	4.65796	4.91435	5.10347	5.28412	4.03435	4.72022	5.36945	5.29706	5.41985	5.13543	5.4363	5.4915	4.87082	4.90227	4.49542	4.71962	4.79866	5.87297	5.14323	5.77086	5.44475	4.9502	5.04844
OG0004578	Lthed_scf0090.1_g081600.1	Qgl_scf0060.1_g030790.1	AT2G20310.1	AT2G20310.1	II	3.93473	4.29781	4.19189	3.95046	3.96443	4.00194	4.17822	3.79654	4.26393	3.97398	3.89636	3.93286	4.05651	3.14799	4.10729	4.18482	4.08414	4.305	4.13459	4.17238	4.12797	3.9727	3.94101	3.51516	4.00306	3.95145	4.09262	4.14752	3.86588	4.13436	4.11273	4.00282	4.04536	4.06667	3.77039	3.91863	4.41475	3.90819	4.02936	3.54518	4.02054	4.28928	4.08423	4.1369
OG0004624	Lthed_scf0020.1_g025900.1	Qgl_scf0030.1_g162100.1	AT4G13750.1	AT4G13750.1	I	2.76091	2.98657	3.1768	3.48517	3.0273	3.26752	3.27278	1.88903	0.790741	0.892565	2.16766	3.00097	3.49935	2.74449	3.07012	2.99441	2.99024	2.92295	3.06813	2.81498	2.84985	1.74784	1.51849	0.62509	2.24161	2.73196	3.32265	2.79658	2.83457	2.54548	2.40971	2.37786	1.98601	1.85127	0.924961	0.293946	0.68851	1.36482	2.50462	2.84231	2.88687	2.56984	2.39328	2.04819
OG0004670	Lthed_scf0040.1_g028590.1	Qgl_scf0050.1_g109040.1	AT3G14470.2	AT3G14470.2	IV	1.37008	1.86536	1.69573	2.03843	1.84359	1.55712	1.4172	1.08921	1.28024	1.31999	1.45643	1.15929	1.64596	1.61575	1.9475	2.02469	1.60444	1.86441	1.76769	1.37658	1.21673	1.10729	1.1901	1.0478	2.04606	1.10416	1.56107	1.3185	0.831188	0.816633	0.990261	0.979172	0.983844	1.0166	0.888785	0.851218	1.17372	1.42728	1.34513	1.01868	0.729448	1.09425	1.21731	1.12825
OG0004721	Lthed_scf0090.1_g010810.1	Qgl_scf0060.1_g106800.1	AT5G17540.1	AT5G17540.1	I	4.89633	5.07271	4.98481	5.12296	5.20816	5.12589	5.16468	4.16984	4.57263	4.6056	5.07686	4.68683	4.98	4.95694	5.31571	5.07538	5.12154	5.21822	5.16614	5.30616	4.60885	4.54077	4.76825	4.64079	5.20841	4.56566	5.0733	5.00239	4.96037	4.89469	4.78123	4.76322	4.70479	4.04936	3.0364	2.68879	3.39473	3.30813	4.66342	4.63123	5.02486	4.89836	4.90286	5.08867
OG0004732	Lthed_scf0100.1_g030250.1	Qgl_scf0100.1_g076320.1	AT3G23170.1	AT3G23170.1	V	6.06699	6.88328	6.29435	8.27145	7.0107	7.2583	6.03786	5.83284	7.27303	5.31405	6.40696	6.55344	6.79188	7.95334	7.79662	8.03489	5.88029	7.3893	6.41025	7.48359	6.49162	6.31157	6.43501	5.4561	7.53676	6.6832	7.01546	6.5745	6.67556	7.06814	6.94245	7.33231	6.83778	7.20258	6.2105	5.37528	5.35924	6.11677	6.07585	6.66311	7.14137	6.92513	7.01498	7.55715
OG0004733	Lthed_scf0100.1_g032430.1	Qgl_scf0100.1_g073620.1	NA	NA	V	0	2.06305	3.24402	1.09502	2.16818	3.35346	4.68908	7.85036	9.22844	9.37356	7.93413	2.51316	0	0.460487	1.51595	0.489422	1.5684	1.06221	2.22405	4.65416	6.69456	9.40874	8.95657	9.32985	6.35037	2.09779	0	3.63325	2.84298	3.57167	3.58584	4.70985	6.2848	9.92123	10.0707	10.8108	10.5141	9.76225	7.71684	4.34201	0.355243	0.553275	2.19381	2.64124
OG0004830	Lthed_scf0030.1_g057950.1	Qgl_scf0010.1_g131180.1	AT2G43020.1	AT2G43020.1	V	6.1336	5.54734	5.76959	5.53899	5.72853	5.40624	5.45574	6.21986	5.98186	5.72771	5.68927	5.88543	6.44305	6.45354	6.2957	5.79764	5.19096	5.44711	5.67485	5.67553	6.55351	6.09593	6.10537	7.03372	5.85538	6.30898	6.4626	6.43448	6.23263	5.82255	5.48769	5.01872	4.79938	5.39393	6.4402	6.89462	6.60417	7.36312	6.06395	6.12329	5.75103	5.86099	5.17201	4.99774
OG0004831	Lthed_scf0070.1_g017000.1	Qgl_scf0080.1_g012540.1	AT4G24715.1	AT5G50200.3	IV	5.32988	5.49585	5.60225	5.10803	5.42521	5.50155	5.20469	5.21229	5.67644	5.81821	5.33936	3.33173	5.68978	5.67844	5.27457	5.02678	5.34527	5.30085	4.735	4.81507	4.72983	5.16661	5.50954	5.32016	4.88475	3.5495	5.58315	5.57335	5.49164	6.16166	6.56083	6.48331	6.81039	6.79814	6.80428	7.11936	5.81886	5.25976	5.18793	4.98126	5.71743	5.98616	6.36622	7.13145
OG0004832	Lthed_scf0060.1_g011000.1	Qgl_scf0090.1_g113910.1	AT1G23000.1	AT1G23000.1	I	6.01097	5.90434	5.31938	6.46745	5.51142	5.51986	5.87816	6.09918	5.03809	5.56742	6.23306	6.70007	6.82685	5.01741	5.06546	6.0834	5.48217	5.62675	6.25283	6.15602	6.10047	5.58475	5.36102	4.52959	6.23139	6.50709	6.09988	5.88248	6.34032	5.99926	5.65612	5.51933	5.87745	5.40978	5.47346	3.93069	2.55034	3.84042	5.57996	6.55554	6.19127	6.05981	4.75112	5.37352
OG0004834	Lthed_scf0090.1_g051510.1	Qgl_scf0060.1_g062680.1	AT4G17500.1	AT4G17500.1	V	3.30443	4.76693	5.18454	5.17961	5.43406	5.67465	3.33659	6.54867	7.09884	6.9225	3.99564	2.51695	4.30969	3.71336	5.2842	5.06995	4.31252	3.55365	3.64667	5.44447	6.96831	7.50995	7.25747	7.79882	5.3219	2.98018	4.03419	2.50232	1.51909	3.03555	3.1797	3.57957	3.843	6.07383	7.36462	7.50328	4.23383	4.18273	2.37025	1.99777	2.92757	3.84578	3.25037	4.12872
OG0004835	Lthed_scf0110.1_g070430.1	Qgl_scf0110.1_g024060.1	AT2G38110.1	AT2G38110.1	I	5.7559	5.82315	5.36353	6.51529	5.56005	5.90895	6.03989	6.16396	5.50136	5.53798	5.5459	5.84418	6.67383	5.03276	3.02518	6.02425	5.50813	6.36697	6.78924	6.52403	6.00152	5.06664	4.22166	4.13514	5.18381	5.99317	6.75735	5.11944	6.69147	6.905	6.23317	5.46354	6.95774	3.82638	2.62433	0.566979	0.192812	0.438937	2.70528	4.68625	7.3424	6.4933	5.62189	5.31753
OG0004838	Lthed_scf0050.1_g087150.1	Qgl_scf0040.1_g095410.1	AT5G43700.1	AT5G43700.1	I	5.26693	5.23436	5.34956	4.6499	4.54064	3.62879	3.47036	3.90495	3.17594	3.47659	4.97959	3.65254	6.53026	6.5251	6.35367	4.1455	3.82496	3.90745	2.37719	2.673	3.00158	3.38256	3.17634	3.4511	3.48522	3.81125	6.16339	6.24756	5.53661	5.15425	4.67865	4.46195	4.32698	4.82838	5.79468	5.18819	6.07392	6.15672	5.84515	6.20188	6.94989	6.48106	6.0544	5.90334
OG0004840	Lthed_scf0120.1_g009380.1	Qgl_scf0120.1_g008080.1	AT4G17895.1	AT4G17895.1	I	3.50677	3.42532	3.11422	3.45227	3.2154	3.13785	3.59228	2.31685	1.40123	1.57731	1.97874	4.3217	3.5069	3.31825	2.95342	3.07958	2.33545	3.05017	3.48812	3.27205	2.4345	1.77503	1.70322	1.7576	2.2094	4.15309	3.04231	3.50335	3.83091	3.58969	3.18734	3.27726	3.4036	2.54785	1.73924	2.01821	1.72452	1.66194	2.89652	3.5457	3.94302	3.45462	3.25	2.64983
OG0004841	Lthed_scf0110.1_g020060.1	Qgl_scf0110.1_g065620.1	AT3G56720.3	AT3G56720.3	III	4.20201	4.12236	4.15103	3.98511	4.13091	4.33557	4.23479	3.66567	4.15629	4.50352	4.74597	4.34763	3.55176	4.17831	4.09981	4.36863	4.46458	4.05103	4.08376	4.36994	4.19365	4.48237	4.47921	4.43311	4.53359	4.0497	4.11467	4.15188	4.45442	4.59789	4.67774	4.72227	4.61236	4.47969	4.72559	4.73011	4.74188	4.55315	3.88384	4.11698	4.39605	4.44245	4.97908	4.73084
OG0004842	Lthed_scf0060.1_g032730.1	Qgl_scf0090.1_g085290.1	AT1G50420.1	AT1G50420.1	III	4.03525	4.08561	4.04107	4.0414	4.41629	4.52667	4.49645	4.2939	4.78388	4.61336	3.85726	2.55315	4.2733	3.87717	3.52236	4.12028	4.17257	4.64382	4.5506	4.32511	4.61465	4.49192	4.77287	5.13582	3.5995	3.17426	4.06011	4.1098	4.40778	4.33152	4.73467	4.67106	4.79204	4.7358	5.08482	4.8255	4.94888	4.37823	4.01561	3.63605	3.92504	4.65873	4.46674	4.37163
OG0004844	Lthed_scf0080.1_g078360.1	Qgl_scf0070.1_g034960.1	AT5G45100.1	AT5G45100.1	V	4.85354	5.04061	5.34765	5.54374	5.48899	5.70892	5.92753	6.48655	6.94006	6.58654	5.74103	4.13276	4.81071	5.03202	4.7083	5.76096	5.64637	5.83906	5.82772	6.12395	6.65562	6.86488	7.01382	7.94445	5.32998	4.80907	4.85846	4.43398	3.80013	4.16862	4.85777	4.78638	5.32187	5.65477	6.74944	6.96386	7.34013	5.83204	5.99799	4.71889	3.97451	4.04402	4.22593	4.48406
OG0004845	Lthed_scf0050.1_g096330.1	Qgl_scf0040.1_g110020.1	AT5G27120.1	AT5G27120.1	III	5.3143	5.2482	5.0467	5.21955	5.04669	4.98112	5.69609	5.64751	5.71768	5.58936	5.84079	6.26361	5.39509	4.89206	4.70486	4.70929	5.05811	5.04713	5.37539	5.51222	5.91334	5.60974	5.65439	5.35373	5.57212	6.23369	5.10861	5.60468	5.25889	5.19086	5.39105	5.30015	5.52873	5.59418	5.5169	5.31087	5.40674	5.64184	6.2902	6.10972	5.4616	5.12752	5.02883	4.81391
OG0004846	Lthed_scf0100.1_g085980.1	Qgl_scf0100.1_g018480.1	AT3G50410.1	AT3G50410.1	I	6.36201	6.32628	6.61843	5.7937	6.61983	6.25148	5.75851	3.80773	2.46198	2.35292	4.57072	6.08808	6.04985	6.34173	6.46321	6.39033	5.94791	6.42168	5.43798	5.25477	3.93767	3.17073	2.00607	0.805543	4.14053	4.56025	6.15643	6.75871	6.01115	5.37362	5.03992	4.94442	4.99761	3.82393	1.89861	1.19687	3.02772	3.27437	4.22558	5.56999	6.18469	5.93247	5.48272	5.87668
OG0004849	Lthed_scf0090.1_g023270.1	Qgl_scf0060.1_g090050.1	AT4G25670.2	AT4G25670.2	IV	6.85125	6.46981	6.62148	6.27975	6.35784	6.50041	6.64485	6.96012	7.13953	7.25671	6.46841	6.17124	6.33456	6.50829	6.26091	6.48731	6.55279	6.75911	6.41373	6.74479	7.02898	7.1205	7.18579	8.01696	6.79892	6.43495	6.87344	6.76955	6.75513	6.64098	6.75762	6.95934	6.8238	7.13541	7.42711	7.66846	7.67861	7.26922	6.29395	6.5828	6.67551	6.93153	6.57889	6.85649
OG0004850	Lthed_scf0090.1_g023180.1	Qgl_scf0060.1_g090180.1	AT4G25700.1	AT4G25700.1	IV	5.34032	5.72573	6.8083	4.95147	5.73874	6.11172	4.75758	4.98282	5.10934	4.74293	4.42135	5.08945	5.75771	5.52301	5.69093	5.30592	5.02261	4.98095	4.91565	4.72722	5.66525	4.95138	4.16031	4.76085	5.53617	5.38807	5.64634	5.9845	5.17028	4.52411	5.04671	4.69031	4.44663	4.80977	6.74065	6.0262	4.81342	5.99491	5.65973	5.64935	5.26912	5.20386	4.62003	4.07291
OG0004851	Lthed_scf0090.1_g022080.1	Qgl_scf0060.1_g091170.1	AT4G21190.1	AT4G21190.1	IV	2.36014	2.7327	2.86419	3.26297	2.23847	2.51313	2.78094	3.74748	4.77785	4.22635	4.07168	3.19429	2.72378	2.64694	2.51518	2.79064	2.4993	2.43262	3.2154	3.40674	4.12575	4.50832	4.61581	5.07554	3.43093	3.68314	2.75239	3.92578	3.85414	3.70154	4.16308	4.23968	4.1484	5.01275	5.89224	5.8678	5.98513	6.10394	5.83777	4.27375	3.80566	4.56773	4.04346	4.37824
OG0004852	Lthed_scf0030.1_g123090.1	Qgl_scf0010.1_g053680.1	AT2G13600.1	AT2G13600.1	III	0.641673	0.532382	0.42916	0.393247	0.386625	0.971545	0.736764	0.61195	0.230203	0.686579	0.762458	0.825778	0.831266	0.64669	0.686117	0.839613	0.787548	1.00095	1.00656	0.853023	1.04634	0.997963	0.838142	1.12488	1.21879	1.28149	0.827995	0.634059	0.471215	0.410447	0.359983	0.430287	0.486858	0.541204	0.70576	0.903659	0.59304	0.749614	0.895739	0.73156	0.705735	0.37042	0.423976	0.310932
OG0004853	Lthed_scf0090.1_g016170.1	Qgl_scf0060.1_g102070.1	AT5G53460.3	AT5G53460.3	I	4.85516	4.38838	3.95753	4.32485	3.61598	3.88418	4.22882	5.54638	4.81998	4.45315	4.61755	4.56685	4.85502	4.77626	4.37469	4.31188	3.86493	4.01367	4.90583	4.73944	5.26295	4.94681	4.88349	5.02357	4.62805	4.82079	5.39892	5.28145	5.46145	4.72474	3.9912	4.07859	4.35858	4.73491	4.84867	4.34848	5.21787	5.12405	5.22627	5.71269	5.12976	5.85586	4.14804	3.73329
OG0004854	Lthed_scf0090.1_g016030.1	Qgl_scf0060.1_g102190.1	AT5G53440.1	AT5G53440.2	V	4.56337	4.76333	4.67815	4.719	4.74064	4.7177	4.59233	4.75965	4.89138	4.82383	4.90746	4.54171	4.33061	4.26699	4.5902	4.81494	5.1432	4.82982	4.67555	4.73242	5.01651	4.77428	5.32544	5.09787	4.89552	4.71927	4.60859	4.55827	4.53602	4.50517	4.82299	4.61545	4.61495	4.73325	3.99215	4.14329	4.5334	4.23881	4.43447	4.39698	4.33031	4.6279	4.58719	4.68097
OG0004855	Lthed_scf0090.1_g015990.1	Qgl_scf0060.1_g102220.1	AT5G53400.1	AT5G53400.1	III	7.32349	6.88871	7.05868	6.06768	6.90137	7.19378	6.55766	6.48364	6.26355	6.47373	6.24578	6.49674	6.47598	6.81899	6.89659	6.52369	7.15021	7.5103	6.133	6.12932	6.34304	6.4721	6.62475	6.52951	6.21499	6.4689	6.36557	6.17973	6.01962	6.5049	6.47375	6.20223	6.20791	5.7963	6.03457	6.08802	6.07248	5.80939	5.75426	6.10019	5.91624	5.60631	5.99807	5.82905
OG0004856	Lthed_scf0060.1_g010530.1	Qgl_scf0090.1_g114740.1	NA	NA	V	7.64168	7.6611	8.13222	7.64927	7.6744	7.93698	7.63407	8.38903	8.14453	7.28021	6.45657	6.56935	7.52222	6.1865	7.69329	7.68224	7.60129	7.8398	7.79886	7.894	7.73658	7.84351	7.13064	8.46386	6.14647	6.75445	8.65534	6.94045	7.35804	7.35436	7.02946	7.18904	7.21025	7.47037	8.43685	8.43665	7.45655	7.32589	5.96474	6.48822	7.67342	8.21696	7.4349	6.68235
OG0004858	Lthed_scf0060.1_g012950.1	Qgl_scf0090.1_g110830.1	AT1G15110.4	AT1G15110.4	IV	1.75555	1.88569	2.4751	3.08239	2.70832	2.36131	2.04323	3.23521	3.93267	3.48039	2.77627	2.26707	2.09396	2.59438	2.28463	2.61922	2.26233	1.71746	2.26071	1.97283	3.22831	3.52261	3.81605	3.73783	3.27345	3.04487	2.44776	3.19311	2.81175	2.58285	2.82601	2.55867	2.18119	3.66616	4.49638	5.09856	5.30721	4.7634	4.66374	3.71522	2.67784	2.55031	2.43663	2.85818
OG0004861	Lthed_scf0060.1_g080920.1	Qgl_scf0090.1_g038980.1	AT5G38830.1	AT5G38830.1	V	5.14178	4.97152	4.68484	4.81359	4.7453	4.66962	4.90346	4.85884	4.79442	4.42004	4.68857	5.23475	5.03991	4.92682	4.67406	4.86992	4.8573	5.10856	5.10479	5.19652	5.01068	4.82863	4.51899	4.95035	4.58616	5.25513	4.97917	5.14226	5.31706	5.40315	5.44473	5.36998	5.52681	5.03705	4.82556	5.08309	5.35485	5.25082	4.85948	5.07378	5.39372	5.35816	5.37879	4.95587
OG0004864	Lthed_scf0090.1_g046160.1	Qgl_scf0060.1_g067100.1	AT5G17020.2	AT5G17020.1	III	5.67553	5.23302	5.50954	5.05276	5.34623	5.07718	5.33964	4.94421	5.0144	5.18637	5.26901	5.42768	5.48036	5.58968	5.41823	5.44238	5.56592	5.81482	5.15147	5.09198	5.17129	5.07237	5.11868	5.19176	5.14546	5.30876	5.15001	5.18999	5.29828	5.40863	5.39325	5.26043	5.10213	5.04751	5.27817	5.2015	5.16885	5.21822	5.66854	5.19283	5.27023	5.14684	5.26776	4.86824
OG0004865	Lthed_scf0090.1_g046230.1	Qgl_scf0060.1_g067040.1	AT5G17060.2	AT5G17060.2	III	6.21061	5.82666	5.87166	5.93168	6.06347	5.85392	6.00953	6.0436	6.36387	6.4711	6.25336	5.79292	5.56824	6.19353	6.20364	6.15983	6.35989	6.05687	5.87525	6.05953	6.33893	6.52243	6.49469	6.49727	6.13263	5.62564	5.95748	6.03886	6.0869	5.97	5.97914	6.18444	6.27074	6.24745	6.56108	6.77796	6.71092	6.43496	6.15008	5.86947	5.82727	6.07832	6.33718	6.24386
OG0004869	Lthed_scf0120.1_g073230.1	Qgl_scf0120.1_g064390.1	AT1G22170.2	AT1G22170.2	I	4.81914	3.97313	3.49728	3.9836	3.83457	3.76433	3.96738	3.57358	3.1202	2.3645	2.36734	3.23846	4.1452	3.96771	2.8616	4.14126	3.5145	4.41523	4.22916	4.14918	3.30924	3.4098	2.35188	2.85186	2.83558	3.49967	4.9339	4.14424	4.98246	5.71827	4.02371	4.55679	4.89826	3.68765	3.38239	3.23057	3.03234	3.35155	3.48447	3.98609	4.96517	5.1899	4.66237	3.99949
OG0004870	Lthed_scf0120.1_g071920.1	Qgl_scf0120.1_g063490.1	AT1G22020.2	AT1G22020.2	IV	4.60074	4.23608	4.33645	4.45803	4.0384	4.26867	4.04757	5.03436	5.42532	5.42326	5.28113	4.77179	3.96439	4.33096	4.53335	4.57944	4.70619	4.55741	4.55756	4.53574	5.53047	5.62799	5.62913	6.09207	5.2043	4.82923	4.26819	4.97051	4.49904	4.55853	4.64217	4.63538	4.58813	5.34515	5.73429	6.05443	6.0118	5.8376	5.095	4.91902	4.2185	4.77493	4.66407	5.00036
OG0004872	Lthed_scf0090.1_g071500.1	Qgl_scf0060.1_g040030.1	AT4G08500.1	AT4G08500.1	IV	4.38312	4.57369	4.12542	4.35336	4.31548	4.34097	4.18677	4.18382	4.49422	4.37023	4.26974	4.30699	4.10623	4.57273	4.90223	4.65022	4.46649	4.60307	4.27792	4.14291	4.37139	4.33365	4.31948	4.56212	4.26634	3.96413	4.16005	4.61403	4.42496	4.59665	4.5628	4.40745	4.24163	4.07818	5.10531	5.38888	4.59718	4.92914	3.88783	4.20412	4.10249	4.11624	4.39776	4.39786
OG0004875	Lthed_scf0090.1_g065190.1	Qgl_scf0060.1_g046460.1	AT1G21880.2	AT1G21880.2	I	5.91537	5.79502	5.29364	5.9384	5.63891	5.64883	6.31111	6.01886	5.79285	5.35215	5.63653	6.43662	6.61947	6.1896	5.59098	5.48713	5.23383	5.59808	6.15157	5.92412	6.36249	5.74297	5.57423	4.69419	5.43174	6.1666	6.00916	6.33204	6.27614	6.15682	6.03009	6.12985	5.89856	6.07502	5.63739	5.46944	4.9192	5.01298	5.71129	6.5803	6.60549	5.88265	5.38054	5.65674
OG0004876	Lthed_scf0090.1_g065010.1	Qgl_scf0060.1_g046560.1	AT1G77610.1	AT1G77610.1	V	6.06856	6.16914	6.28034	6.17734	6.09365	6.08606	6.1228	6.53555	6.26968	5.89512	5.84638	6.03332	6.53673	6.32354	6.04105	6.09576	6.23749	6.22842	6.18079	6.11159	6.31148	6.11789	5.79346	6.301	5.85078	6.19034	6.39241	6.34193	6.43684	6.29407	6.45135	6.25815	6.16255	6.3885	6.45811	6.74272	6.95057	6.89561	6.63728	6.57316	6.52463	6.32723	5.98465	6.199
OG0004877	Lthed_scf0090.1_g064180.1	Qgl_scf0060.1_g047130.1	AT3G05270.3	AT3G05270.3	I	3.319	3.23559	3.31471	3.5055	3.08643	3.01266	3.60071	2.90505	2.15791	2.63508	2.78079	4.46469	3.57388	3.18063	2.6534	2.98624	2.61872	3.27189	3.59762	3.34138	2.91887	2.69523	2.48818	1.80562	2.84919	3.918	3.08637	3.20092	3.53428	3.66535	2.75002	2.79853	3.04948	2.54612	2.82582	2.28839	1.95669	2.48601	3.5349	3.85268	3.55273	2.89202	2.61897	2.60484
OG0004878	Lthed_scf0090.1_g042610.1	Qgl_scf0060.1_g069900.1	AT5G16790.2	AT5G16790.2	I	6.04034	6.07072	5.92077	5.75707	5.57815	5.66891	5.98887	6.02912	5.64317	5.73988	5.76228	6.16426	6.075	5.77487	5.76134	5.65302	5.67807	6.10681	6.13408	5.69349	6.05767	5.67546	5.70238	5.90639	5.63423	5.86521	5.94569	6.40938	6.36021	6.3313	6.27903	6.2141	6.19662	5.96059	6.05659	6.20607	6.05792	6.07701	6.48341	6.38321	6.28719	6.19256	6.17205	6.08124
OG0004879	Lthed_scf0090.1_g039440.1	Qgl_scf0060.1_g072160.1	AT5G16650.1	AT5G16650.1	IV	2.99117	2.8391	3.44602	1.61794	2.14277	1.04821	2.93217	2.71724	2.67222	3.33349	2.86294	3.53725	3.19669	2.212	2.45552	1.55334	1.86534	2.96871	2.13523	3.00788	3.04528	2.80609	3.89867	3.96172	2.803	2.78847	3.3141	2.48569	2.87195	2.39684	2.07549	3.26548	3.45417	3.19735	3.22819	3.59964	3.56728	4.01562	3.85719	3.00309	3.5041	3.05723	3.10606	3.37269
OG0004880	Lthed_scf0090.1_g038770.1	Qgl_scf0060.1_g072460.1	AT3G13960.1	AT3G13960.1	I	3.50588	3.7343	4.12713	4.24561	3.84479	4.73891	5.31233	5.15987	5.13167	5.44863	6.0896	5.94594	2.9633	2.73833	2.33556	3.5158	4.21157	4.36297	5.09866	5.00312	5.67639	5.45865	5.36751	4.47772	6.18673	4.97947	2.56013	3.8593	3.89481	4.36945	3.97645	4.28548	3.85416	4.71104	4.93401	4.16495	3.89107	5.07233	5.25188	4.98538	2.86275	3.65111	2.94516	3.60867
OG0004881	Lthed_scf0090.1_g038520.1	Qgl_scf0060.1_g073070.1	AT1G64980.2	AT1G64980.2	I	6.8912	6.88432	6.6185	6.96219	7.02706	6.83221	5.7129	5.71454	6.2207	5.05925	5.90284	6.57095	7.77211	7.5827	7.65623	6.48339	5.09801	5.76844	5.87913	6.2117	5.29014	4.81237	4.23764	5.12874	5.84886	6.44725	7.39123	6.96723	6.5636	6.31183	5.87852	5.77306	5.43542	5.44146	6.93427	6.71075	4.5289	8.16951	5.5876	5.91958	6.71865	6.39428	6.14003	5.43593
OG0004885	Lthed_scf0090.1_g011280.1	Qgl_scf0060.1_g106540.1	AT3G49550.1	AT3G49550.1	V	6.96552	7.05141	6.4952	6.98514	6.77163	7.05325	7.0339	7.45891	7.76303	7.47121	7.71194	7.66967	7.62496	6.97993	6.47732	7.07047	6.64847	6.61801	7.06868	7.15156	7.60547	7.55522	8.10567	8.39509	7.4135	7.4994	7.52688	7.40672	7.33476	6.83101	7.13516	6.81919	6.32196	6.96094	7.08581	7.20839	7.22628	7.56526	7.14927	7.13501	7.50102	7.26728	6.71385	6.79196
OG0004887	Lthed_scf0090.1_g012650.1	Qgl_scf0060.1_g105240.1	AT3G49470.1	AT3G49470.1	IV	6.76792	6.36438	6.04408	6.85734	6.2984	6.06158	6.85574	6.41422	6.38006	6.34803	6.58737	7.6972	6.96216	6.64025	6.28557	6.12603	5.90032	6.101	6.65707	6.75806	6.53118	6.64511	6.81896	6.46022	6.6666	7.55228	6.87904	7.27502	7.12664	7.17084	6.97003	7.00717	7.04554	7.08596	7.16397	7.02044	7.19837	7.25581	7.51209	7.83859	7.24203	6.93954	6.83011	6.82513
OG0004888	Lthed_scf0090.1_g013920.1	Qgl_scf0060.1_g103740.1	AT3G49350.1	AT3G49350.1	V	5.16057	5.39039	4.87579	5.15437	4.89019	5.12158	5.31196	5.54075	5.67927	5.5472	5.68898	5.60979	5.40473	5.41624	5.11023	4.93669	4.94964	4.95609	5.33468	5.35583	5.79112	5.64726	5.59028	5.58853	5.56771	5.25427	5.46815	5.86175	5.68201	5.47862	5.58861	5.34413	5.40057	5.65691	6.12241	6.1143	6.5106	6.23388	5.99404	5.62216	5.6908	5.56671	5.52661	5.24845
OG0004889	Lthed_scf0090.1_g013940.1	Qgl_scf0060.1_g103720.1	AT5G53550.6	AT5G53550.6	II	4.25288	4.35162	4.42335	4.41946	3.98501	4.13158	4.17011	4.7125	5.23767	5.28372	5.45039	4.83526	3.94994	4.64614	4.62238	4.40594	4.35626	4.09049	4.17137	4.12644	4.33232	4.99028	4.91102	5.0688	5.31048	4.30044	4.60611	4.67703	3.6845	3.60111	3.7624	3.33662	3.6214	4.45094	5.09967	5.18129	5.43245	5.29007	5.91668	5.98584	3.56601	3.99052	3.42093	4.22022
OG0004890	Lthed_scf0090.1_g014010.1	Qgl_scf0060.1_g103680.1	AT4G27680.1	AT4G27680.1	III	5.30569	5.04031	5.17158	5.25838	5.33768	4.87918	5.1365	5.35485	5.83718	5.68195	5.69608	5.86271	5.2387	5.49423	5.32982	5.06531	5.19104	5.17453	5.12566	5.34432	5.55995	5.67934	5.81282	6.09171	5.4616	6.0478	5.25208	5.53799	5.57812	5.59042	5.53106	5.47386	5.50434	5.66941	6.02175	6.32799	6.37164	6.07383	5.72874	5.68098	5.57182	5.37456	5.22909	5.35629
OG0004891	Lthed_scf0090.1_g014050.1	Qgl_scf0060.1_g103670.1	AT2G46620.1	AT2G46620.1	IV	0.607171	1.16825	0.478163	1.11739	0.29773	0.651832	1.06529	1.81065	1.95996	2.05653	2.25008	1.61212	0.733375	0.284997	0.6001	0.733065	0.632527	0.74656	1.44559	1.33891	2.22834	2.19762	1.7094	2.72086	1.73512	1.57034	0.930668	1.74118	1.20299	1.0426	1.01718	1.01336	0.83321	1.4886	2.83204	2.80529	1.3024	1.06513	1.77366	1.37774	0.887593	1.48577	0.692378	1.05845
OG0004893	Lthed_scf0050.1_g073070.1	Qgl_scf0040.1_g080250.1	AT1G14870.1	AT1G14870.1	IV	5.50404	6.17678	6.3952	5.27227	5.83614	6.29691	4.0716	4.61158	4.40947	5.04918	5.39905	3.92063	5.83948	5.71281	6.72284	5.93185	5.86447	5.63934	5.21889	4.74622	4.65718	4.64929	4.90166	4.91317	5.78611	4.13614	5.71122	5.91805	5.35058	5.27181	5.20602	5.15325	5.04778	5.11405	5.43143	5.48022	5.19194	4.85587	5.15026	5.07851	5.38426	5.53695	5.93322	5.43987
OG0004894	Lthed_scf0050.1_g072870.1	Qgl_scf0040.1_g080020.1	AT1G23220.1	AT1G23220.1	I	5.46768	5.30679	4.76802	5.13836	5.43629	5.50275	5.88218	5.03636	3.11159	3.75527	2.73848	3.98546	5.29792	6.05626	6.00514	5.34363	4.55629	4.91175	4.70931	5.36667	5.81171	4.79142	4.62856	3.45157	4.31348	4.31397	5.54172	5.35897	5.98735	5.66144	6.67144	6.33005	6.67264	6.48124	5.0572	3.85863	3.53919	3.06571	3.80995	5.22952	5.5897	5.25262	5.61129	6.23626
OG0004895	Lthed_scf0050.1_g071110.1	Qgl_scf0040.1_g078210.1	AT2G01690.1	AT2G01690.1	V	4.78156	4.86364	4.46517	4.68027	4.6108	4.50579	4.83683	5.93479	5.79018	5.6321	5.3338	4.99148	5.20606	4.88205	5.05978	4.99318	4.83296	4.56308	5.24551	5.04079	5.95683	5.99734	6.47698	6.21607	5.50426	5.48434	5.22961	5.55781	5.33649	4.95876	5.41298	5.12375	5.07734	5.78809	6.15121	6.17104	6.13402	5.7895	6.09718	5.6557	5.25673	5.32275	5.07438	5.07908
OG0004896	Lthed_scf0050.1_g070820.1	Qgl_scf0040.1_g077600.1	AT1G68060.1	AT1G68060.1	I	5.65172	5.46262	5.26276	5.72072	5.58129	5.45769	5.44772	5.25542	4.975	5.07218	5.38484	5.53842	5.44734	5.65877	5.57728	5.69452	5.45317	5.46203	5.71498	5.65163	5.41091	5.27645	5.26546	4.8194	5.11947	5.35345	5.4989	5.12771	5.62271	5.5527	5.61738	5.56549	5.60619	5.0131	4.55168	4.1613	4.23414	4.58991	4.66552	5.38764	5.55684	5.27217	5.18359	5.23246
OG0004897	Lthed_scf0030.1_g132040.1	Qgl_scf0010.1_g043850.1	AT4G14590.1	AT4G14590.1	IV	1.28392	1.45232	1.65538	1.18169	1.6372	1.11453	1.45983	1.8342	2.05969	2.41484	1.81979	1.56223	1.23308	1.60469	1.44777	1.43282	1.51579	1.56524	1.58585	1.56395	1.95829	1.86269	2.15644	1.98254	1.9579	1.48296	1.12973	1.51027	1.51839	1.51259	1.79928	1.67196	1.57313	1.8634	2.18117	1.96409	2.04397	2.02312	1.95922	1.43962	1.53509	1.48726	1.71587	1.85337
OG0004898	Lthed_scf0050.1_g068520.1	Qgl_scf0040.1_g073180.1	AT5G24080.2	AT5G24080.2	I	4.3822	4.79489	4.71444	4.34133	4.50672	4.58062	3.52418	3.38603	3.07121	3.05985	3.41712	2.66358	4.71148	4.18186	4.42871	4.78098	4.57793	4.60412	4.08463	3.89175	3.40714	3.15681	2.97314	2.99827	3.44796	2.97896	4.49989	4.26916	4.27128	4.4059	3.93838	4.00702	3.74927	3.93393	3.94884	4.19932	4.45275	4.08755	3.2783	3.01165	4.29112	4.80214	4.46641	4.31047
OG0004899	Lthed_scf0030.1_g133370.1	Qgl_scf0010.1_g041610.1	AT3G12280.2	AT3G12280.2	III	4.38956	4.18354	4.25459	4.35718	4.3886	4.29179	4.39675	3.98548	4.08997	4.49788	4.26578	4.25069	4.04388	4.01753	4.12949	4.48083	4.4053	4.3126	4.19785	4.16239	3.82893	4.37889	4.29579	4.56333	4.13058	4.12675	3.7909	4.01878	4.26102	4.25022	4.30047	4.40938	4.19284	4.20665	4.37959	4.52923	4.56633	4.17517	3.99747	3.92995	4.51623	4.19459	4.42008	4.14523
OG0004900	Lthed_scf0050.1_g059910.1	Qgl_scf0040.1_g065120.1	AT3G18630.1	AT3G18630.1	I	3.30901	3.55871	3.08245	3.93253	3.69931	3.74039	4.0844	2.35072	0.898219	1.85845	2.18501	4.12045	3.56195	2.81755	2.94306	3.37179	3.02763	3.42768	3.86525	3.32722	2.14323	1.59142	1.15664	1.09077	2.52551	3.63476	3.20848	3.1065	3.66207	3.7198	2.65131	3.31795	3.46557	2.02264	1.21118	1.35297	1.41991	1.53456	2.26331	3.33068	3.65527	2.84266	2.97192	2.74965
OG0004901	Lthed_scf0050.1_g066310.1	Qgl_scf0040.1_g072010.1	AT2G01930.2	AT2G01930.2	V	5.47623	5.45177	5.61222	5.55817	5.25546	5.61166	5.81057	5.92305	6.14397	6.24227	6.12898	5.94889	5.39692	5.44631	5.06283	5.40225	5.53157	5.67217	5.90685	5.74334	6.39546	6.55405	6.4648	6.83189	5.91734	6.12673	5.55645	5.69667	5.64408	5.9755	5.6274	5.87698	5.76714	5.78925	6.7664	6.71317	6.62618	6.38447	6.2755	6.23254	5.72683	5.60553	5.60589	5.72874
OG0004902	Lthed_scf0050.1_g066900.1	Qgl_scf0040.1_g072520.1	AT1G68080.1	AT1G68080.1	III	2.34275	1.85154	2.52227	2.06158	1.42303	1.60484	1.69205	2.36492	2.405	2.00385	2.0861	1.95652	2.00563	2.44664	2.23263	2.07983	1.86304	2.06627	2.22192	1.89749	2.11833	2.38199	2.33705	2.10537	2.19386	1.99192	2.21926	2.2954	2.0942	2.00186	1.98141	2.06809	2.34924	2.15142	1.72651	1.81052	1.66989	2.02182	2.3472	1.81455	2.19801	2.09137	2.18842	2.08192
OG0004903	Lthed_scf0050.1_g052070.1	Qgl_scf0040.1_g058220.1	AT3G25640.2	AT3G25640.2	I	3.54952	4.06092	3.01613	2.56513	3.16829	3.08095	2.89969	2.37034	1.00566	1.5698	1.68897	1.74731	3.25584	3.7805	3.79784	3.38701	3.60213	3.46378	3.2392	2.69746	1.88144	1.9392	1.31028	0.690572	1.57918	2.36204	3.69285	2.79316	3.19521	3.02219	2.66429	2.74754	2.50815	1.48291	0.131119	0	0	0.369601	1.00489	2.32518	3.15519	3.52642	3.48717	3.39865
OG0004904	Lthed_scf0100.1_g100030.1	Qgl_scf0100.1_g004370.1	AT5G23280.1	AT5G23280.1	I	6.90053	7.10051	7.06147	6.8646	7.07554	6.95251	6.41281	5.49006	5.70456	5.51685	6.05435	6.63402	7.10627	7.01433	7.04161	7.21184	6.8647	7.31641	6.72556	6.53076	5.85234	5.51303	5.34355	5.53057	6.23039	6.14954	6.41667	6.88939	6.82217	6.94904	6.70805	6.64074	6.66399	5.47277	5.45854	5.51354	5.89149	6.22457	5.27888	6.48957	6.57665	6.25091	6.29167	6.51253
OG0004905	Lthed_scf0050.1_g049830.1	Qgl_scf0040.1_g055930.1	AT4G02580.1	AT4G02580.1	III	6.90769	6.64546	6.52392	6.50558	6.50469	6.52185	6.73759	7.05052	6.52121	6.06751	6.1062	7.25779	7.1472	7.03996	6.70415	6.43544	6.27857	6.48321	6.83542	6.76391	6.51356	6.58035	6.12201	6.27094	6.18017	7.4764	7.0052	6.96723	7.00106	6.99839	6.40766	6.9551	6.75863	6.849	6.73661	6.18069	5.63193	5.81155	6.69026	7.39373	7.38115	7.00912	6.59814	6.47519
OG0004906	Lthed_scf0050.1_g060020.1	Qgl_scf0040.1_g065180.1	AT5G64520.5	AT5G64520.5	IV	2.40894	2.194	1.38156	2.67325	2.1061	1.95647	1.90964	2.23977	2.64469	2.59604	1.98806	2.63233	1.93809	2.0653	2.05527	1.82954	2.02795	1.43877	2.27853	2.23393	2.34806	2.32432	2.52813	2.15036	2.33569	2.53324	1.55858	2.15385	1.99204	2.16286	2.57563	2.57201	2.0958	2.68676	2.78149	2.75244	2.67381	2.63279	2.18568	2.37542	1.9692	2.70992	2.05324	2.56356
OG0004907	Lthed_scf0050.1_g049670.1	Qgl_scf0040.1_g055760.1	AT5G23120.2	AT5G23120.2	II	5.00093	4.52618	4.82634	4.79992	4.75315	4.86392	4.64079	5.09396	5.45858	5.26436	5.00418	5.19333	4.98986	4.09969	4.24976	4.36188	4.82547	4.39966	4.50963	4.77084	4.98116	5.06562	5.22516	5.125	5.16631	5.40527	4.7574	4.60927	4.0489	4.13725	4.66355	4.47707	4.69229	5.37022	5.58789	5.38881	5.10539	4.86467	5.32548	5.37777	4.84667	4.78227	3.96062	4.42899
OG0004908	Lthed_scf0050.1_g111530.1	Qgl_scf0040.1_g132920.1	AT1G06440.1	AT1G06440.1	III	0.763703	0.88602	0	0.737658	1.23691	0.61083	0.786808	0.743885	1.42008	1.28332	1.81583	1.50426	0.832896	0.995122	1.10462	0.750834	0.91676	0.905956	1.14159	0.955451	1.32316	1.19216	1.12017	1.28722	1.77132	1.28429	0.674015	1.61744	1.06565	0.918822	1.0962	1.03858	1.09646	1.43979	1.57302	1.29671	1.06619	1.7155	1.60114	1.4242	1.15184	1.01463	0.915855	0.768403
OG0004910	Lthed_scf0050.1_g022600.1	Qgl_scf0040.1_g028990.1	AT1G24590.1	AT1G24590.1	I	1.86087	2.6077	1.84244	1.50391	2.62349	2.62795	3.33806	4.10083	4.43807	4.84314	4.59448	3.49558	1.9709	0.884039	0.29674	2.2758	2.27759	2.34172	3.41153	3.34626	4.40262	4.45916	3.79672	4.87131	4.23596	2.61584	1.28174	0.559569	0.775919	0.685894	0.833325	0.589781	0.826679	0.664113	1.68823	0.709845	0.642383	0.677371	0.787574	0.359296	0.791667	0.800917	0.344376	0.450111
OG0004913	Lthed_scf0050.1_g019110.1	Qgl_scf0040.1_g026110.1	AT1G70505.4	AT1G70505.4	IV	4.76584	4.602	4.51923	3.60618	4.16581	4.1621	3.74608	4.28058	3.86126	3.25989	3.31516	4.07803	4.87972	4.23207	4.79178	3.94888	3.88375	4.12934	3.66637	3.73006	3.82237	3.49406	3.40798	4.15411	3.01616	4.12896	4.79983	3.38784	3.42694	3.36133	3.45439	3.49384	2.91975	3.27649	3.34388	3.6244	4.13748	3.68751	2.92575	3.20562	3.85793	3.69974	3.8421	3.51584
OG0004917	Lthed_scf0050.1_g017460.1	Qgl_scf0040.1_g018740.1	AT1G70170.1	AT1G70170.1	V	5.53809	6.32282	6.4799	6.76011	7.03344	6.47673	5.06982	4.21638	5.93233	3.78906	4.52951	4.57302	4.88404	6.06054	7.20871	6.99228	5.94346	5.27706	4.14052	5.36414	3.46708	3.16768	3.70957	2.91738	5.28525	4.02899	4.75637	4.5124	4.90109	5.65999	5.26951	5.67004	4.71005	5.14733	2.3183	2.83336	1.88806	2.37917	4.4959	3.1577	4.52959	4.91955	6.68704	5.37129
OG0004918	Lthed_scf0050.1_g016130.1	Qgl_scf0040.1_g017970.1	AT1G59650.1	AT1G59650.1	IV	5.28589	5.36519	5.35307	5.10725	4.93181	4.61454	4.84576	5.80555	6.12741	5.98689	5.335	4.45575	5.96479	5.74736	5.61545	5.01597	5.03065	5.20339	5.02009	5.06347	5.76516	6.06374	6.57088	6.9002	5.48924	5.05792	5.8732	5.9226	5.78966	5.69388	5.18544	5.1373	5.1166	5.749	6.48974	6.83427	6.51986	6.3288	6.01821	5.9275	6.01913	6.16764	5.67465	5.65609
OG0004919	Lthed_scf0050.1_g015780.1	Qgl_scf0040.1_g017710.1	AT5G62620.1	AT5G62620.1	III	2.57529	2.54226	2.29265	3.07917	2.92772	3.14879	2.90923	2.91537	3.07237	3.1124	2.99958	2.56053	2.39709	2.74478	3.39968	3.13622	3.1217	2.79514	2.99761	2.8927	2.99061	3.03259	3.43518	3.49097	2.8706	2.36722	2.74647	2.65015	2.9315	3.24622	3.34356	3.35099	2.99586	2.99759	3.02166	4.0952	3.73349	3.76218	2.80668	2.35929	2.51965	2.42674	3.17857	3.08179
OG0004920	Lthed_scf0050.1_g015400.1	Qgl_scf0040.1_g017260.1	AT1G59725.1	AT1G59725.1	V	5.29175	5.15611	5.71468	5.88721	5.88328	5.72411	5.01514	5.2373	6.16476	5.66797	5.19395	4.72076	4.81223	5.7461	6.64979	6.0067	5.47359	5.01764	4.91627	5.48326	5.39544	5.93983	5.94636	6.66622	5.37143	4.52972	5.18197	5.60018	5.28353	5.32347	5.33325	5.52666	5.33164	6.0379	7.34155	7.86465	6.46298	6.62606	5.11586	4.97637	5.16949	5.58563	5.68876	5.95405
OG0004921	Lthed_scf0050.1_g014970.1	Qgl_scf0040.1_g016640.1	AT2G02710.2	AT2G02710.2	II	4.33408	4.5831	4.43053	4.55303	4.20699	4.20088	4.52889	4.90635	5.11953	5.16725	4.91764	4.83988	4.71786	4.58156	4.65884	4.10169	4.45965	4.12099	4.86536	4.57339	5.27485	5.13562	5.34345	5.5219	5.02265	5.24337	5.14574	4.56473	4.33406	4.52075	4.4611	4.8839	4.63686	5.17305	5.34823	5.31811	5.40939	5.25123	5.32724	4.96109	4.79694	4.7456	4.44414	4.71622
OG0004922	Lthed_scf0050.1_g014650.1	Qgl_scf0040.1_g016440.1	AT5G15110.1	AT5G15110.1	III	0	0	0	0	0	0	0	0	0	0	0	0	1.21372	0.1802	0	0	0	0	0	0	0	0	0	0	0.0247716	0.0511391	0.548024	0	0	0	0	0	0	0	0	0	0.0340554	0	0.0226117	0.174441	0.139859	0	0	0
OG0004923	Lthed_scf0050.1_g014630.1	Qgl_scf0040.1_g016410.1	AT1G27000.1	AT1G27000.1	III	6.75486	6.66675	6.45677	6.73414	6.66583	6.58068	6.88749	7.47473	7.46442	7.69501	7.42251	7.04532	6.35998	6.54442	6.54554	6.62241	6.70937	6.57586	6.8388	6.84954	7.18994	7.49322	7.71498	7.83621	7.37687	6.72644	6.48527	7.2233	7.03712	6.97414	7.11316	7.14472	7.27276	7.4994	7.69508	7.7439	7.81121	7.43169	7.27883	7.41657	6.98331	7.00561	6.97264	7.12563
OG0004925	Lthed_scf0050.1_g012840.1	Qgl_scf0040.1_g014570.1	AT1G69710.1	AT1G69710.2	I	2.81632	2.96608	3.04067	2.63079	2.77062	3.10545	3.10191	3.00748	2.73764	2.96942	3.01971	3.4302	2.9487	2.7665	2.56424	3.0863	3.12508	3.16124	3.09022	2.98364	2.93884	2.69142	2.72791	2.80991	2.85234	3.66083	2.77213	3.40865	3.15062	3.22293	3.40061	3.14137	3.23669	2.63222	2.57474	2.40968	2.91712	2.91196	3.37922	3.24809	2.84301	2.96108	2.97238	2.85898
OG0004927	Lthed_scf0050.1_g011350.1	Qgl_scf0040.1_g012390.1	AT3G28960.5	AT3G28960.5	V	0	0	0	0	0	0	0	0	0	0.0936166	0.080724	0.0745456	0	1.23542	0.201224	0	0	0.052189	0	0.023117	0.0507468	0.146856	0.396499	0.0617078	0.0778192	0.573118	0.148002	0.0591959	0.0969751	0.109786	0.0547239	0.475502	0.541228	0.199873	0.100886	0.112333	0.248424	0.125493	0.226641	0.750377	0.129463	0.139068	1.11517	0.414377
[truncated: 10,838 more rows]
[truncated: 169 more columns]
