# Supplementary material for: Evolution of gene expression in seasonal environments
Source: bioRxiv preprint, doi:10.1101/2025.03.25.645377, version 4 (2025-10-22)
Supplement: Supplementary file 4 [file 645377_file05.xlsx]

## Sheet: Gene list
Supplementary file 4. Summary of identification of genes with rhythmic expression
Gene ID					L. edulis, Leaf							L. glaber, Leaf							Q. glauca, Leaf							Q. acuta, Leaf							L. edulis, Bud							L. glaber, Bud							Q. glauca, Bud
OrthogroupID	GeneID.L.edulis	GeneID.Q.glauca	GeneID.A.thalia_L.edulis	GeneID.A.thalia_Q.glauca	adjusted p.value	period raw	phase raw	peak shape	periodicity type	adjusted period	adjusted phase	adjusted p.value	period raw	phase raw	peak shape	periodicity type	adjusted period	adjusted phase	adjusted p.value	period raw	phase raw	peak shape	periodicity type	adjusted period	adjusted phase	adjusted p.value	period raw	phase raw	peak shape	periodicity type	adjusted period	adjusted phase	adjusted p.value	period raw	phase raw	peak shape	periodicity type	adjusted period	adjusted phase	adjusted p.value	period raw	phase raw	peak shape	periodicity type	adjusted period	adjusted phase	adjusted p.value	period raw	phase raw
OG0000146	Lthed_scf0120.1_g002770.1	Qgl_scf0120.1_g002770.1	AT1G19260.1	AT1G19260.1	0.412003	12	4	9	arrhythmic	11	1	0.781638	6	3	3	arrhythmic	6	12	0.301208	23	15	13	arrhythmic	21	6	0.000151325	13	4	6	annual	12	8	0.945905	11	3	10	arrhythmic	10	12	0.980477	13	3	4	arrhythmic	12	12	0.0172698	14	12
OG0000303	Lthed_scf0080.1_g102870.1	Qgl_scf0070.1_g009360.1			0.966864	15	9	14	arrhythmic	14	6	0.00835095	12	12	4	annual	11	9	0.467358	8	4	4	arrhythmic	7	8	0.0989089	11	4	7	arrhythmic	10	8	0.00428569	7	7	4	half-annual	6	4	0.0379725	13	9	10	arrhythmic	12	6	1.39091e-07	14	10
OG0000803	Lthed_scf0040.1_g035810.1	Qgl_scf0050.1_g101590.1			0.00573347	18	10	6	arrhythmic	17	7	0.725655	5	4	2	arrhythmic	5	1	0.0102909	15	8	8	arrhythmic	14	12	0.838122	9	1	3	arrhythmic	8	5	2.90636e-06	12	12	3	annual	11	9	0.000741246	13	11	4	annual	12	8	0.530537	7	3
OG0000866	Lthed_scf0100.1_g060190.1	Qgl_scf0100.1_g052450.1	AT3G25400.1	AT3G25400.1	1	14	8	9	arrhythmic	13	5	1	13	11	5	arrhythmic	12	8	0.104713	14	13	11	arrhythmic	13	4	0.0440481	12	4	7	arrhythmic	11	8	0.0060098	6	1	2	half-annual	6	10	0.000314296	13	10	7	annual	12	7	0.0285007	7	5
OG0000878	Lthed_scf0030.1_g148240.1	Qgl_scf0010.1_g012870.1	AT3G08010.1	AT3G08010.1	1.79672e-06	14	5	3	annual	13	2	0.000103404	13	5	6	annual	12	2	2.93195e-05	14	11	2	annual	13	2	0.000701251	13	12	2	annual	12	3	6.29389e-08	13	5	7	annual	12	2	0.000613594	13	5	8	annual	12	2	0.0311374	17	10
OG0000891	Lthed_scf0020.1_g149580.1	Qgl_scf0030.1_g029990.1	AT1G62310.1	AT1G62310.1	1.13486e-06	13	9	9	annual	12	6	0.981396	6	6	1	arrhythmic	6	3	0.352657	7	5	3	arrhythmic	6	9	0.0155372	15	1	8	arrhythmic	14	5	0.000146106	11	9	7	annual	10	6	0.333717	12	12	4	arrhythmic	11	9	1.70875e-05	13	4
OG0001009	Lthed_scf0100.1_g022950.1	Qgl_scf0100.1_g084310.1	AT4G16150.1	AT4G16150.1	1.19214e-07	13	10	7	annual	12	7	0.0199908	13	12	6	arrhythmic	12	9	0.083563	15	13	13	arrhythmic	14	4	0.00191335	17	14	15	annual	16	5	0.390772	12	4	3	arrhythmic	11	1	0.000104857	13	1	4	annual	12	10	0.10456	22	22
OG0001022	Lthed_scf0100.1_g061200.1	Qgl_scf0100.1_g051680.1	AT5G09330.5	AT5G09330.5	0.0107353	20	5	3	arrhythmic	18	2	0.000608706	12	9	6	annual	11	6	0.154579	7	3	3	arrhythmic	6	7	0.655641	11	11	8	arrhythmic	10	2	0.0169571	6	4	3	arrhythmic	6	1	0.016482	14	4	9	arrhythmic	13	1	0.00235328	14	11
OG0001046	Lthed_scf0020.1_g111720.1	Qgl_scf0030.1_g067010.1	AT1G17020.1	AT1G17020.1	1	11	9	7	arrhythmic	10	6	1	20	12	8	arrhythmic	18	9	1	2	2	1	arrhythmic	2	6	1	22	13	6	arrhythmic	20	4	1	11	11	3	arrhythmic	10	8	0.0247595	13	9	4	arrhythmic	12	6	1	14	8
OG0001168	Lthed_scf0050.1_g099110.1	Qgl_scf0040.1_g118590.1	AT5G27550.2	AT5G27550.2	0.019692	8	8	3	arrhythmic	7	5	0.22494	6	6	3	arrhythmic	6	3	0.187519	12	11	6	arrhythmic	11	2	0.0118932	14	9	10	arrhythmic	13	12	0.000155975	12	7	10	annual	11	4	9.61317e-07	13	10	7	annual	12	7	0.00013466	14	12
OG0001178	Lthed_scf0120.1_g057220.1	Qgl_scf0120.1_g051010.1	AT1G02840.1	AT1G02840.1	0.261292	23	3	20	arrhythmic	21	12	0.163084	10	2	6	arrhythmic	9	11	0.588708	14	9	8	arrhythmic	13	1	0.0388427	13	1	10	arrhythmic	12	5	0.0416683	12	8	2	arrhythmic	11	5	0.00184175	12	8	9	annual	11	5	0.00213359	13	10
OG0001184	Lthed_scf0080.1_g101990.1	Qgl_scf0070.1_g010410.1	AT4G30110.2	AT4G30110.2	0.101468	16	11	6	arrhythmic	15	8	2.78806e-05	14	11	6	annual	13	8	0.972903	14	12	1	arrhythmic	13	3	0.24405	12	6	4	arrhythmic	11	10	4.94445e-06	13	9	8	annual	12	6	1.58419e-05	12	1	3	annual	11	10	0.00662152	7	7
OG0001185	Lthed_scf0120.1_g052100.1	Qgl_scf0120.1_g046930.1	AT5G10630.3	AT5G10630.3	0.00022874	14	2	10	annual	13	11	0.0180465	13	4	8	arrhythmic	12	1	0.370235	15	11	1	arrhythmic	14	2	0.00182803	12	10	4	annual	11	1	0.000146905	12	4	6	annual	11	1	6.40476e-08	13	4	5	annual	12	1	1.46862e-05	13	10
OG0001220	Lthed_scf0110.1_g089660.1	Qgl_scf0110.1_g009520.1	AT2G36950.1	AT2G36950.1	1.89459e-06	12	10	7	annual	11	7	2.00195e-06	12	11	6	annual	11	8	0.000238373	13	5	6	annual	12	9	0.000364843	14	1	9	annual	13	5	3.477e-06	12	12	3	annual	11	9	3.7089e-05	15	9	9	annual	14	6	0.000872105	12	3
OG0001239	Lthed_scf0030.1_g052710.1	Qgl_scf0010.1_g137450.1	AT1G07250.1	AT1G07250.1	0.00415868	12	10	6	annual	11	7	0.00335002	13	10	6	annual	12	7	2.56671e-05	13	3	6	annual	12	7	0.010389	13	3	5	arrhythmic	12	7	0.000650848	11	10	5	annual	10	7	0.000733966	13	9	7	annual	12	6	0.000136988	14	12
OG0001350	Lthed_scf0100.1_g089310.1	Qgl_scf0100.1_g015310.1	AT4G36690.1	AT4G36690.4	0.386237	7	7	2	arrhythmic	6	4	0.00092956	16	9	6	annual	15	6	0.624489	13	1	7	arrhythmic	12	5	0.299292	4	2	1	arrhythmic	4	6	0.549836	23	4	15	arrhythmic	21	1	0.000187822	13	10	5	annual	12	7	0.00893686	13	12
OG0001376	Lthed_scf0010.1_g040800.1	Qgl_scf0020.1_g039670.1	AT5G15270.3	AT5G15270.3	6.65463e-07	12	4	7	annual	11	1	2.82815e-10	13	4	7	annual	12	1	1.31279e-05	15	8	10	annual	14	12	2.35501e-06	12	10	6	annual	11	1	6.10823e-08	12	3	9	annual	11	12	1.46269e-09	13	4	8	annual	12	1	3.20466e-05	14	9
OG0001386	Lthed_scf0090.1_g080450.1	Qgl_scf0060.1_g031860.1	AT4G28640.1	AT4G28640.1	0.0823204	12	4	9	arrhythmic	11	1	6.5039e-05	13	3	7	annual	12	12	0.17641	12	9	9	arrhythmic	11	1	7.91149e-05	13	11	3	annual	12	2	4.21833e-06	12	3	8	annual	11	12	0.000281103	13	3	9	annual	12	12	0.398885	6	4
OG0001391	Lthed_scf0120.1_g019360.1	Qgl_scf0120.1_g015060.1	AT4G19050.1	AT4G19050.1	0.0132302	12	1	3	arrhythmic	11	10	1.3292e-07	13	12	3	annual	12	9	0.000401024	13	3	6	annual	12	7	2.72399e-07	13	3	6	annual	12	7	6.47731e-06	12	9	7	annual	11	6	1.28243e-07	13	11	6	annual	12	8	8.86131e-07	15	2
OG0001425	Lthed_scf0030.1_g009600.1	Qgl_scf0010.1_g181670.1	AT1G16290.2	AT1G16290.2	0.999995	13	9	9	arrhythmic	12	6	0.000687067	11	1	9	annual	10	10	0.027958	14	13	8	arrhythmic	13	4	0.00570012	15	15	5	annual	14	6	0.000430581	13	9	9	annual	12	6	0.188663	12	8	10	arrhythmic	11	5	0.0395849	13	1
OG0001494	Lthed_scf0050.1_g096970.1	Qgl_scf0040.1_g110330.1	AT1G08830.2	AT1G08830.2	0.0449944	6	4	5	arrhythmic	6	1	0.00125374	13	4	5	annual	12	1	1.03035e-13	14	3	6	annual	13	7	0.0701548	23	11	9	arrhythmic	21	2	0.104168	6	4	4	arrhythmic	6	1	0.00267784	14	3	10	annual	13	12	4.79653e-05	13	5
OG0001495	Lthed_scf0060.1_g019080.1	Qgl_scf0090.1_g103470.1	AT3G56860.9	AT3G56860.9	6.55867e-08	15	1	8	annual	14	10	0.00173234	13	3	9	annual	12	12	0.00227019	14	10	3	annual	13	1	0.0420097	23	1	14	arrhythmic	21	5	3.94769e-08	12	5	5	annual	11	2	2.56456e-07	13	5	7	annual	12	2	6.42778e-05	13	10
OG0001508	Lthed_scf0050.1_g009710.1	Qgl_scf0040.1_g011970.1	AT2G03060.7	AT2G03060.7	0.0882398	13	9	2	arrhythmic	12	6	0.16956	22	16	20	arrhythmic	20	12	0.0384748	23	19	21	arrhythmic	21	10	4.28671e-05	12	11	6	annual	11	2	0.926379	6	2	3	arrhythmic	6	11	7.47753e-06	14	5	4	annual	13	2	0.203362	9	6
OG0001510	Lthed_scf0050.1_g041290.1	Qgl_scf0040.1_g048840.1	AT1G11680.1	AT1G11680.1	0.540589	21	8	17	arrhythmic	19	5	7.88356e-11	13	12	5	annual	12	9	0.992916	7	1	1	arrhythmic	6	5	0.00917724	12	3	10	annual	11	7	0.00244611	11	8	8	annual	10	5	7.66741e-09	13	12	5	annual	12	9	0.00130991	14	12
OG0001545	Lthed_scf0060.1_g065790.1	Qgl_scf0090.1_g053110.1	AT3G46290.1	AT3G46290.1	0.0246591	14	2	3	arrhythmic	13	11	0.115108	7	1	3	arrhythmic	6	10	0.960664	4	4	2	arrhythmic	4	8	0.89044	12	8	11	arrhythmic	11	12	2.25535e-06	14	2	6	annual	13	11	1.91045e-08	13	3	7	annual	12	12	4.56685e-05	13	11
OG0001546	Lthed_scf0030.1_g159310.1	Qgl_scf0010.1_g002000.1	AT2G44260.1	AT2G44260.1	3.93228e-06	15	9	8	annual	14	6	0.000223263	13	12	4	annual	12	9	9.00693e-06	13	1	9	annual	12	5	3.53763e-05	12	3	8	annual	11	7	0.0516426	6	2	3	arrhythmic	6	11	5.70539e-06	13	1	3	annual	12	10	0.0789846	7	7
OG0001571	Lthed_scf0070.1_g089930.1	Qgl_scf0080.1_g083430.1	AT2G31560.3	AT2G31560.3	0.000143416	14	9	9	annual	13	6	9.20566e-06	12	12	3	annual	11	9	0.00205119	13	1	9	annual	12	5	0.193834	14	8	13	arrhythmic	13	12	0.0142726	15	9	9	arrhythmic	14	6	1.12462e-06	14	9	9	annual	13	6	0.000336088	13	2
OG0001581	Lthed_scf0090.1_g073620.1	Qgl_scf0060.1_g038440.1	AT3G23230.1	AT3G23230.1	1	3	3	2	arrhythmic	3	12	1	13	1	7	arrhythmic	12	10	0.000647777	13	11	4	annual	12	2	0.612329	12	11	7	arrhythmic	11	2	0.1883	12	3	5	arrhythmic	11	12	3.03915e-06	13	1	6	annual	12	10	0.726606	15	9
OG0001586	Lthed_scf0020.1_g026280.1	Qgl_scf0030.1_g161760.1	AT4G33000.2	AT4G33000.2	0.793559	8	3	5	arrhythmic	7	12	0.000170019	16	4	5	annual	15	1	0.0136717	7	4	3	arrhythmic	6	8	0.000460466	13	12	7	annual	12	3	0.00151716	13	5	10	annual	12	2	0.000442491	13	5	7	annual	12	2	0.146045	11	3
OG0001587	Lthed_scf0020.1_g056340.1	Qgl_scf0030.1_g123710.1	AT5G25360.3	AT5G25360.3	0.0728865	13	12	2	arrhythmic	12	9	0.148271	6	3	4	arrhythmic	6	12	0.0596749	14	6	2	arrhythmic	13	10	0.924797	6	1	3	arrhythmic	6	5	0.676813	7	3	4	arrhythmic	6	12	0.659593	22	20	7	arrhythmic	20	4	0.020795	13	10
OG0001617	Lthed_scf0080.1_g102650.1	Qgl_scf0070.1_g009680.1	AT5G37850.4	AT5G37850.4	2.68989e-08	13	4	7	annual	12	1	3.96997e-11	13	4	7	annual	12	1	1.07354e-08	13	9	9	annual	12	1	3.1555e-06	13	9	6	annual	12	12	4.6169e-09	12	4	6	annual	11	1	8.84904e-09	14	3	8	annual	13	12	5.15993e-06	13	9
OG0001622	Lthed_scf0070.1_g084040.1	Qgl_scf0080.1_g074700.1	AT5G63970.2	AT5G63970.2	2.12788e-05	14	6	2	annual	13	3	3.11248e-07	13	8	3	annual	12	5	0.00111681	13	5	6	annual	12	9	0.00196168	12	2	8	annual	11	6	0.00347441	10	9	4	annual	9	6	0.000480607	12	9	8	annual	11	6	0.261145	12	1
OG0001623	Lthed_scf0040.1_g063040.1	Qgl_scf0050.1_g071160.1	AT4G27130.1	AT4G27130.1	0.167131	8	5	3	arrhythmic	7	2	0.103893	23	10	2	arrhythmic	21	7	0.143627	15	2	5	arrhythmic	14	6	0.112718	23	13	7	arrhythmic	21	4	0.000928017	10	5	4	annual	9	2	0.0075618	13	3	8	annual	12	12	0.0050029	7	3
OG0001630	Lthed_scf0010.1_g084210.1	Qgl_scf0020.1_g081220.1	AT5G12080.3	AT5G12080.3	0.0535544	10	2	7	arrhythmic	9	11	0.898926	7	2	4	arrhythmic	6	11	0.000187879	13	11	6	annual	12	2	0.0171505	12	10	9	arrhythmic	11	1	0.0041914	13	1	8	annual	12	10	1.38352e-09	13	3	9	annual	12	12	6.82157e-05	12	12
OG0001635	Lthed_scf0120.1_g008190.1	Qgl_scf0120.1_g006780.1	AT1G32330.1	AT1G32330.1	9.72635e-06	12	12	4	annual	11	9	5.90428e-05	13	11	8	annual	12	8	1.69899e-05	13	5	3	annual	12	9	0.000780078	13	5	3	annual	12	9	0.000716368	12	12	3	annual	11	9	3.58254e-05	13	10	9	annual	12	7	0.00110577	14	3
OG0001642	Lthed_scf0040.1_g076480.1	Qgl_scf0050.1_g059070.1	AT1G53210.1	AT1G53210.1	0.00489006	13	3	7	annual	12	12	4.78682e-05	14	2	3	annual	13	11	0.273302	15	9	5	arrhythmic	14	1	0.0490848	13	9	3	arrhythmic	12	12	5.3336e-05	13	2	8	annual	12	11	0.00497207	7	2	3	half-annual	6	11	0.233925	23	5
OG0001662	Lthed_scf0010.1_g200290.1	Qgl_scf0020.1_g193790.1	AT5G12020.1	AT5G12020.1	0.000729146	13	12	2	annual	12	9	0.144775	6	5	4	arrhythmic	6	2	0.000341766	14	3	4	annual	13	7	0.140488	11	5	1	arrhythmic	10	9	0.000316924	6	5	3	half-annual	6	2	0.0056436	6	5	4	half-annual	6	2	0.0218985	12	6
OG0001683	Lthed_scf0110.1_g009510.1	Qgl_scf0110.1_g076600.1	AT5G46100.1	AT5G46100.1	0.742118	7	6	4	arrhythmic	6	3	0.529853	13	2	1	arrhythmic	12	11	0.0123812	13	11	3	arrhythmic	12	2	0.140526	13	6	12	arrhythmic	12	10	0.339846	6	2	1	arrhythmic	6	11	0.545793	7	6	4	arrhythmic	6	3	0.00897754	14	12
OG0001696	Lthed_scf0030.1_g015070.1	Qgl_scf0010.1_g178070.1	AT1G20140.1	AT1G20140.1	0.00200625	16	1	8	annual	15	10	8.16898e-10	13	4	7	annual	12	1	0.000558043	13	11	3	annual	12	2	2.59107e-05	12	10	8	annual	11	1	3.27088e-05	12	4	5	annual	11	1	0.000274565	14	3	8	annual	13	12	0.00171095	20	12
OG0001697	Lthed_scf0090.1_g017320.1	Qgl_scf0060.1_g097680.1	AT3G49170.1	AT3G49170.1	0.210609	23	23	9	arrhythmic	21	7	0.000942327	12	1	3	annual	11	10	0.295796	14	5	9	arrhythmic	13	9	0.0345282	6	1	3	arrhythmic	6	5	0.891862	3	3	1	arrhythmic	3	12	0.0502312	12	1	3	arrhythmic	11	10	0.239912	23	12
OG0001703	Lthed_scf0040.1_g128550.1	Qgl_scf0050.1_g011700.1	AT3G13170.1	AT3G13170.1	0.999928	23	6	12	arrhythmic	21	3	0.00669745	14	11	5	annual	13	8	0.48218	15	1	6	arrhythmic	14	5	0.957942	4	2	2	arrhythmic	4	6	0.991677	11	6	8	arrhythmic	10	3	0.23471	6	6	3	arrhythmic	6	3	0.338498	22	8
OG0001717	Lthed_scf0010.1_g143810.1	Qgl_scf0020.1_g133750.1			1.8909e-05	14	5	3	annual	13	2	4.72384e-07	13	5	6	annual	12	2	0.836562	7	4	2	arrhythmic	6	8	2.32338e-05	14	11	8	annual	13	2	0.932737	6	5	3	arrhythmic	6	2	1.88931e-05	13	5	4	annual	12	2	0.0148465	23	9
OG0001738	Lthed_scf0040.1_g057700.1	Qgl_scf0050.1_g076440.1	AT1G03940.1	AT1G03940.1	0.000270735	13	9	8	annual	12	6	0.000325276	13	12	4	annual	12	9	9.39528e-08	13	1	9	annual	12	5	6.26854e-06	12	4	5	annual	11	8	0.324333	4	2	2	arrhythmic	4	11	8.29261e-08	13	11	5	annual	12	8	1.23565e-05	13	1
OG0001750	Lthed_scf0070.1_g090650.1	Qgl_scf0080.1_g084070.1			1	4	4	2	arrhythmic	4	1	1	9	3	5	arrhythmic	8	12	1	13	11	7	arrhythmic	12	2	1	11	11	6	arrhythmic	10	2	1	3	1	1	arrhythmic	3	10	1	8	2	4	arrhythmic	7	11	1	16	8
OG0001800	Lthed_scf0110.1_g011970.1	Qgl_scf0110.1_g074400.1	AT2G41430.5	AT2G41430.5	0.619454	13	9	9	arrhythmic	12	6	0.0317122	21	12	12	arrhythmic	19	9	0.0290069	12	2	3	arrhythmic	11	6	0.0623791	7	3	3	arrhythmic	6	7	0.949545	15	6	14	arrhythmic	14	3	0.986466	7	1	3	arrhythmic	6	10	0.000288966	12	4
OG0001805	Lthed_scf0050.1_g011430.1	Qgl_scf0040.1_g012420.1	AT2G02960.6	AT2G02960.6	0.00159518	15	2	7	annual	14	11	0.000716109	12	7	5	annual	11	4	0.197406	12	12	5	arrhythmic	11	3	0.0177243	11	11	7	arrhythmic	10	2	0.187374	10	5	5	arrhythmic	9	2	0.674595	8	6	6	arrhythmic	7	3	0.21156	10	5
OG0001815	Lthed_scf0080.1_g019260.1	Qgl_scf0070.1_g094490.1	AT2G21470.1	AT2G21470.1	3.27743e-05	13	4	8	annual	12	1	1.04188e-08	13	4	6	annual	12	1	0.00295324	14	9	8	annual	13	1	1.81201e-05	11	11	4	annual	10	2	8.87187e-08	12	4	6	annual	11	1	0.189757	23	17	13	arrhythmic	21	1	1.10631e-06	14	9
OG0001849	Lthed_scf0030.1_g091900.1	Qgl_scf0010.1_g090920.1	AT3G20970.1	AT3G20970.1	5.31988e-05	15	2	7	annual	14	11	1.14165e-06	12	5	7	annual	11	2	0.00020196	12	11	4	annual	11	2	5.78298e-08	13	9	7	annual	12	12	0.000214568	12	5	4	annual	11	2	8.62157e-07	13	4	6	annual	12	1	0.000737395	14	10
OG0001859	Lthed_scf0060.1_g075650.1	Qgl_scf0090.1_g043360.1	AT1G07120.1	AT1G07120.1	0.2355	21	5	13	arrhythmic	19	2	0.00053818	12	12	6	annual	11	9	0.0248441	15	12	13	arrhythmic	14	3	0.0377894	22	14	13	arrhythmic	20	5	1.49823e-05	12	9	8	annual	11	6	4.1817e-09	12	1	3	annual	11	10	2.66193e-08	14	2
OG0001861	Lthed_scf0060.1_g053100.1	Qgl_scf0090.1_g067220.1	AT1G07350.3	AT1G07350.1	0.79753	12	12	3	arrhythmic	11	9	2.02992e-05	12	10	4	annual	11	7	0.0216781	14	3	5	arrhythmic	13	7	0.170129	8	2	5	arrhythmic	7	6	0.0914777	6	5	3	arrhythmic	6	2	0.000563484	6	6	2	half-annual	6	3	0.269482	14	3
OG0001908	Lthed_scf0100.1_g045160.1	Qgl_scf0100.1_g059140.1	AT3G07040.1	AT3G07040.1	0.201793	17	4	4	arrhythmic	16	1	0.200161	6	4	4	arrhythmic	6	1	0.275533	14	12	1	arrhythmic	13	3	0.101273	12	1	6	arrhythmic	11	5	0.0518298	6	4	3	arrhythmic	6	1	0.000106424	13	4	6	annual	12	1	0.00159319	7	3
OG0001909	Lthed_scf0080.1_g007280.1	Qgl_scf0070.1_g109430.1	AT5G23590.2	AT5G23590.2	0.000567093	11	10	8	annual	10	7	0.0182593	7	2	5	arrhythmic	6	11	0.0740018	7	3	3	arrhythmic	6	7	2.10522e-05	11	11	3	annual	10	2	0.121863	11	11	7	arrhythmic	10	8	0.0238502	12	4	5	arrhythmic	11	1	0.025585	14	9
OG0001912	Lthed_scf0100.1_g012980.1	Qgl_scf0100.1_g092060.1			0.681613	11	5	5	arrhythmic	10	2	0.811324	14	2	7	arrhythmic	13	11	0.0141935	12	9	5	arrhythmic	11	1	0.24042	16	4	5	arrhythmic	15	8	0.00215706	11	8	4	annual	10	5	0.00390073	13	7	7	annual	12	4	0.0240319	15	12
OG0001917	Lthed_scf0020.1_g004290.1	Qgl_scf0030.1_g186100.1	AT3G16770.1	AT1G53910.3	0.134357	13	4	2	arrhythmic	12	1	0.135028	18	12	14	arrhythmic	17	9	0.0757314	12	5	2	arrhythmic	11	9	0.0345637	6	4	3	arrhythmic	6	8	0.567205	6	5	3	arrhythmic	6	2	0.00518113	17	9	11	annual	16	6	0.107604	17	14
OG0001928	Lthed_scf0050.1_g097230.1	Qgl_scf0040.1_g112640.1	AT3G05000.1	AT3G05000.1	0.000975408	13	3	10	annual	12	12	0.017965	17	4	5	arrhythmic	16	1	3.8831e-06	14	9	8	annual	13	1	3.49874e-06	13	9	7	annual	12	12	0.00040814	13	5	5	annual	12	2	2.84659e-05	13	5	6	annual	12	2	6.61366e-08	14	9
OG0001941	Lthed_scf0070.1_g031870.1	Qgl_scf0080.1_g025970.1	AT3G03305.1	AT3G03305.1	0.27241	17	9	12	arrhythmic	16	6	0.000415547	13	12	4	annual	12	9	0.634419	5	3	3	arrhythmic	5	7	0.083118	12	10	9	arrhythmic	11	1	0.196038	11	8	9	arrhythmic	10	5	0.00915437	13	12	4	annual	12	9	0.00188084	13	11
OG0001951	Lthed_scf0090.1_g051640.1	Qgl_scf0060.1_g062500.1	AT5G51180.2	AT5G51180.2	0.0599984	6	4	3	arrhythmic	6	1	1.12675e-05	13	3	5	annual	12	12	3.34323e-06	13	9	9	annual	12	1	1.56032e-07	13	9	8	annual	12	12	0.0457917	6	3	4	arrhythmic	6	12	0.00405299	13	2	4	annual	12	11	0.000229981	13	9
OG0001952	Lthed_scf0080.1_g100840.1	Qgl_scf0070.1_g011480.1	AT3G11710.1	AT3G11710.1	0.0173573	13	5	4	arrhythmic	12	2	1.854e-06	14	2	9	annual	13	11	1.45939e-09	13	4	8	annual	12	8	3.33097e-07	13	8	8	annual	12	12	2.58802e-05	13	6	2	annual	12	3	0.0028512	14	5	4	annual	13	2	3.87608e-08	14	3
OG0001956	Lthed_scf0030.1_g123180.1	Qgl_scf0010.1_g053360.1	AT4G30800.1	AT4G30800.1	0.0918659	23	8	13	arrhythmic	21	5	0.205295	12	2	9	arrhythmic	11	11	0.13223	22	7	19	arrhythmic	20	11	0.523035	23	7	19	arrhythmic	21	11	0.0365769	13	7	3	arrhythmic	12	4	0.142496	10	8	6	arrhythmic	9	5	7.48343e-05	12	12
OG0001980	Lthed_scf0010.1_g033890.1	Qgl_scf0020.1_g032250.1	AT3G57340.2	AT3G57340.2	0.0655862	10	4	5	arrhythmic	9	1	0.000434856	13	4	7	annual	12	1	0.00436294	14	9	4	annual	13	1	0.0240953	14	9	5	arrhythmic	13	12	0.000293781	13	4	2	annual	12	1	0.00119099	13	4	6	annual	12	1	0.038106	13	9
OG0001981	Lthed_scf0010.1_g028930.1	Qgl_scf0020.1_g028560.1	AT2G10950.3	AT2G10950.3	0.757244	13	5	8	arrhythmic	12	2	3.68691e-05	13	11	4	annual	12	8	0.000163478	14	13	11	annual	13	4	0.00013483	13	1	10	annual	12	5	0.00999277	12	12	3	annual	11	9	0.130777	16	9	9	arrhythmic	15	6	3.70838e-05	13	2
OG0001988	Lthed_scf0010.1_g152340.1	Qgl_scf0020.1_g142500.1	AT1G76890.2	AT1G76890.2	0.0234304	13	7	7	arrhythmic	12	4	0.012011	13	9	5	arrhythmic	12	6	0.137285	13	13	7	arrhythmic	12	4	0.0572511	13	8	12	arrhythmic	12	12	0.113433	4	3	3	arrhythmic	4	12	0.0278249	14	2	13	arrhythmic	13	11	0.000145627	13	10
OG0001992	Lthed_scf0120.1_g026670.1	Qgl_scf0120.1_g022930.1	AT1G62870.1	AT1G62870.1	5.55466e-06	13	9	8	annual	12	6	1.72209e-07	13	12	5	annual	12	9	2.74435e-07	14	13	12	annual	13	4	0.000181773	12	4	6	annual	11	8	3.13595e-06	13	8	9	annual	12	5	7.93119e-07	13	13	3	annual	12	10	0.00037685	14	2
OG0001994	Lthed_scf0010.1_g024860.1	Qgl_scf0020.1_g024010.1	AT3G14850.2	AT3G14850.2	0.0717419	15	8	9	arrhythmic	14	5	0.00105924	13	12	5	annual	12	9	0.147033	12	3	6	arrhythmic	11	7	1	13	1	6	arrhythmic	12	5	0.00171923	12	7	10	annual	11	4	2.91855e-07	12	11	6	annual	11	8	0.039422	7	6
OG0002014	Lthed_scf0070.1_g100170.1	Qgl_scf0080.1_g097250.1	AT3G52050.2	AT3G52050.2	0.65457	9	3	6	arrhythmic	8	12	0.878724	14	13	8	arrhythmic	13	10	0.000102871	14	3	10	annual	13	7	0.227282	12	7	7	arrhythmic	11	11	0.211565	18	1	6	arrhythmic	17	10	0.240572	23	20	8	arrhythmic	21	4	0.787085	10	6
OG0002034	Lthed_scf0060.1_g014580.1	Qgl_scf0090.1_g107250.1			0.999991	8	1	5	arrhythmic	7	10	0.0314396	15	9	9	arrhythmic	14	6	0.0581255	20	7	15	arrhythmic	18	11	0.713944	23	4	6	arrhythmic	21	8	0.325016	13	7	2	arrhythmic	12	4	0.027858	12	9	5	arrhythmic	11	6	0.0932275	23	18
OG0002036	Lthed_scf0110.1_g096950.1	Qgl_scf0110.1_g003020.1	AT3G53630.1	AT3G53630.1	1.34762e-05	14	1	7	annual	13	10	4.69403e-09	13	3	6	annual	12	12	0.000547794	14	9	4	annual	13	1	2.65407e-05	14	7	7	annual	13	11	0.000323173	12	4	5	annual	11	1	3.91407e-09	14	3	8	annual	13	12	0.067032	14	10
OG0002053	Lthed_scf0020.1_g112390.1	Qgl_scf0030.1_g066800.1	AT1G17020.1	AT1G17020.1	1.35591e-05	12	11	6	annual	11	8	0.00140275	13	10	8	annual	12	7	8.29155e-06	14	11	6	annual	13	2	0.00091804	12	3	8	annual	11	7	4.5803e-05	13	10	10	annual	12	7	2.07068e-06	13	3	7	annual	12	12	5.4944e-11	13	10
OG0002067	Lthed_scf0010.1_g058620.1	Qgl_scf0020.1_g058610.1	AT5G14420.4	AT5G14420.4	3.06131e-08	14	2	8	annual	13	11	3.08873e-10	13	3	7	annual	12	12	9.43903e-07	13	10	5	annual	12	1	3.01605e-06	13	9	7	annual	12	12	1.0195e-06	12	3	9	annual	11	12	5.23376e-07	14	2	8	annual	13	11	7.13176e-08	14	10
OG0002071	Lthed_scf0040.1_g061200.1	Qgl_scf0050.1_g073390.1	AT3G25830.1	AT3G25830.1	1	12	11	3	arrhythmic	11	8	0.0149519	11	10	4	arrhythmic	10	7	8.52133e-05	14	13	11	annual	13	4	0.0336041	13	5	4	arrhythmic	12	9	3.8402e-05	12	10	6	annual	11	7	3.21357e-08	13	9	7	annual	12	6	0.0215382	14	3
OG0002198	Lthed_scf0060.1_g019200.1	Qgl_scf0090.1_g103140.1	AT5G21105.1	AT5G21105.1	0.446973	11	8	6	arrhythmic	10	5	0.985226	10	8	6	arrhythmic	9	5	0.000828057	14	14	9	annual	13	5	0.00024308	13	3	7	annual	12	7	0.00350987	13	6	11	annual	12	3	2.08329e-05	12	8	8	annual	11	5	0.00423166	14	12
OG0002201	Lthed_scf0080.1_g002800.1	Qgl_scf0070.1_g114030.1	AT3G12500.1	AT3G12500.1	0.0531629	21	4	18	arrhythmic	19	1	0.740681	7	3	4	arrhythmic	6	12	0.896915	10	3	8	arrhythmic	9	7	0.00934265	13	10	9	annual	12	1	0.00822382	6	3	5	half-annual	6	12	0.100307	7	3	3	arrhythmic	6	12	0.0681388	18	4
OG0002202	Lthed_scf0090.1_g021860.1	Qgl_scf0060.1_g091420.1	AT1G51160.3	AT1G51160.3	1.42144e-05	14	8	10	annual	13	5	0.983785	8	5	5	arrhythmic	7	2	0.0182884	21	7	19	arrhythmic	19	11	0.945837	6	4	2	arrhythmic	6	8	0.0302776	11	8	7	arrhythmic	10	5	0.208939	23	20	7	arrhythmic	21	4	0.590079	14	12
OG0002208	Lthed_scf0090.1_g066410.1	Qgl_scf0060.1_g045340.1	AT1G77670.1	AT1G77670.1	0.143076	23	20	6	arrhythmic	21	4	0.23986	7	6	5	arrhythmic	6	3	0.102675	15	5	3	arrhythmic	14	9	0.692662	11	5	7	arrhythmic	10	9	0.00806078	20	14	10	arrhythmic	18	10	0.000188914	13	10	6	annual	12	7	0.00428258	13	1
OG0002209	Lthed_scf0090.1_g045110.1	Qgl_scf0060.1_g068550.1	AT5G03415.1	AT5G03415.1	0.948507	6	4	1	arrhythmic	6	1	0.453012	7	3	3	arrhythmic	6	12	0.998566	11	10	6	arrhythmic	10	1	0.302775	14	4	8	arrhythmic	13	8	0.999137	12	3	7	arrhythmic	11	12	0.0481307	6	4	3	arrhythmic	6	1	0.08061	14	9
OG0002214	Lthed_scf0050.1_g068700.1	Qgl_scf0040.1_g074220.1	AT1G16020.1	AT1G16020.1	0.00176595	7	2	4	half-annual	6	11	0.000186372	12	12	9	annual	11	9	5.96874e-05	13	8	8	annual	12	12	3.42545e-05	12	8	10	annual	11	12	0.00325884	13	2	3	annual	12	11	0.000739825	12	1	3	annual	11	10	0.0141028	15	9
OG0002216	Lthed_scf0050.1_g049060.1	Qgl_scf0040.1_g054150.1	AT5G23150.2	AT5G23150.3	4.16465e-05	13	4	5	annual	12	1	3.44966e-12	13	3	9	annual	12	12	0.000793385	13	10	5	annual	12	1	0.02624	23	21	21	arrhythmic	21	11	0.00244927	12	4	4	annual	11	1	6.82397e-10	14	2	8	annual	13	11	7.82963e-05	12	11
OG0002225	Lthed_scf0080.1_g017420.1	Qgl_scf0070.1_g096800.1	AT1G75560.2	AT1G75560.2	0.0672997	14	3	8	arrhythmic	13	12	9.63921e-06	13	4	5	annual	12	1	0.213409	15	13	10	arrhythmic	14	4	0.178547	22	10	13	arrhythmic	20	1	0.0108939	14	3	8	arrhythmic	13	12	0.0897617	7	3	2	arrhythmic	6	12	0.018434	14	12
OG0002230	Lthed_scf0010.1_g002010.1	Qgl_scf0020.1_g002810.1	AT5G49840.1	AT5G49840.1	0.28516	17	10	9	arrhythmic	16	7	0.0362738	12	2	3	arrhythmic	11	11	0.702181	23	9	14	arrhythmic	21	1	5.69248e-05	12	4	7	annual	11	8	0.94304	12	1	4	arrhythmic	11	10	0.247077	11	4	1	arrhythmic	10	1	0.0033906	23	12
OG0002233	Lthed_scf0080.1_g035520.1	Qgl_scf0070.1_g074510.1	AT4G34131.1	AT4G34131.1	0.0113926	23	10	21	arrhythmic	21	7	2.58228e-06	13	6	5	annual	12	3	0.275533	14	12	1	arrhythmic	13	3	0.780568	10	2	7	arrhythmic	9	6	0.699415	14	11	9	arrhythmic	13	8	0.0016067	13	2	9	annual	12	11	0.23021	7	2
OG0002243	Lthed_scf0010.1_g192490.1	Qgl_scf0020.1_g186970.1	AT4G02630.1	AT4G02630.1	0.0377416	13	9	7	arrhythmic	12	6	0.0346028	6	6	2	arrhythmic	6	3	7.00692e-05	14	13	7	annual	13	4	0.305391	7	1	4	arrhythmic	6	5	0.0222683	13	8	9	arrhythmic	12	5	0.746199	10	9	5	arrhythmic	9	6	0.00495414	15	4
OG0002245	Lthed_scf0070.1_g056240.1	Qgl_scf0080.1_g049290.1	AT3G18000.1	AT3G18000.1	0.0682973	20	8	17	arrhythmic	18	5	7.50952e-05	13	1	8	annual	12	10	0.0171388	13	9	9	arrhythmic	12	1	0.00707024	12	8	10	annual	11	12	0.00594904	6	1	4	half-annual	6	10	0.00132652	13	11	6	annual	12	8	0.00580854	7	5
OG0002246	Lthed_scf0070.1_g061220.1	Qgl_scf0080.1_g053440.1	AT3G17810.1	AT3G17810.1	0.465359	9	3	6	arrhythmic	8	12	0.0499653	16	6	10	arrhythmic	15	3	0.848606	12	5	8	arrhythmic	11	9	0.319108	23	9	15	arrhythmic	21	12	0.0285209	13	4	2	arrhythmic	12	1	0.61247	13	4	1	arrhythmic	12	1	0.117361	7	3
OG0002248	Lthed_scf0010.1_g025610.1	Qgl_scf0020.1_g025100.1	AT5G35180.3	AT5G35180.2	4.19895e-07	13	4	2	annual	12	1	4.52696e-05	13	3	8	annual	12	12	0.110296	13	9	9	arrhythmic	12	1	4.32669e-05	14	8	8	annual	13	12	0.0238574	13	3	7	arrhythmic	12	12	1.36488e-05	13	3	8	annual	12	12	0.0249889	13	10
OG0002250	Lthed_scf0030.1_g148250.1	Qgl_scf0010.1_g012860.1	AT3G63510.1	AT3G63510.1	0.0944883	14	12	4	arrhythmic	13	9	0.196102	6	1	3	arrhythmic	6	10	0.989456	14	14	13	arrhythmic	13	5	0.00521776	11	5	7	annual	10	9	0.0855109	12	7	5	arrhythmic	11	4	0.0483393	15	8	9	arrhythmic	14	5	1.52974e-05	14	12
OG0002253	Lthed_scf0030.1_g138290.1	Qgl_scf0010.1_g033980.1			0.53846	13	10	7	arrhythmic	12	7	0.000519128	13	10	7	annual	12	7	0.00364111	12	6	7	annual	11	10	0.00150316	12	5	5	annual	11	9	0.00329653	12	5	2	annual	11	2	0.977839	12	3	1	arrhythmic	11	12	0.196197	22	17
OG0002265	Lthed_scf0060.1_g068770.1	Qgl_scf0090.1_g050650.1	AT3G45650.1	AT3G45660.3	0.00256035	13	9	12	annual	12	6	0.00126119	13	13	9	annual	12	10	4.07519e-05	13	1	9	annual	12	5	0.000178601	12	3	8	annual	11	7	3.56372e-05	12	9	8	annual	11	6	4.89436e-08	13	1	2	annual	12	10	1.21633e-06	13	1
OG0002271	Lthed_scf0060.1_g022650.1	Qgl_scf0090.1_g094900.1	AT1G08280.1	AT1G08280.1	5.63541e-08	13	9	8	annual	12	6	2.94945e-06	13	12	4	annual	12	9	9.72161e-06	14	13	11	annual	13	4	9.82954e-05	12	4	6	annual	11	8	2.87675e-09	12	8	8	annual	11	5	6.3183e-11	13	12	4	annual	12	9	0.00534853	14	12
OG0002272	Lthed_scf0060.1_g040400.1	Qgl_scf0090.1_g078830.1	AT2G40830.4	AT2G40830.4	0.922227	6	6	2	arrhythmic	6	3	0.00230671	12	5	7	annual	11	2	0.712813	10	4	4	arrhythmic	9	8	0.00719701	7	2	5	half-annual	6	6	0.00166834	12	3	9	annual	11	12	1.11934e-07	13	3	7	annual	12	12	0.00020734	14	10
OG0002273	Lthed_scf0090.1_g027010.1	Qgl_scf0060.1_g085970.1	AT5G52200.1	AT5G52200.1	2.90432e-07	12	4	9	annual	11	1	2.94859e-09	13	4	7	annual	12	1	3.07069e-07	14	10	7	annual	13	1	0.000218126	12	10	6	annual	11	1	0.0143245	6	3	3	arrhythmic	6	12	0.110496	13	3	10	arrhythmic	12	12	0.000159355	15	9
OG0002283	Lthed_scf0050.1_g039150.1	Qgl_scf0040.1_g046700.1	AT1G28100.6	AT1G28100.6	0.023568	13	6	8	arrhythmic	12	3	0.484143	13	6	6	arrhythmic	12	3	0.372783	14	12	9	arrhythmic	13	3	0.437202	17	7	16	arrhythmic	16	11	0.000361982	12	7	7	annual	11	4	0.000172515	14	7	9	annual	13	4	0.0165159	11	4
OG0002285	Lthed_scf0010.1_g079090.1	Qgl_scf0020.1_g076480.1	AT3G02360.2	AT3G02360.2	0.00543059	14	2	5	annual	13	11	3.44395e-06	14	2	9	annual	13	11	0.00289052	14	9	8	annual	13	1	0.00707217	13	10	6	annual	12	1	0.0266644	6	2	4	arrhythmic	6	11	0.129353	15	12	6	arrhythmic	14	9	0.0119562	14	10
OG0002292	Lthed_scf0050.1_g049890.1	Qgl_scf0040.1_g056030.1	AT5G08305.1	AT5G08305.1	0.00441059	13	12	4	annual	12	9	0.00214947	12	12	6	annual	11	9	0.000436832	14	3	5	annual	13	7	0.00829922	11	3	8	annual	10	7	0.775532	12	11	6	arrhythmic	11	8	0.00880529	13	11	5	annual	12	8	0.61142	14	3
OG0002303	Lthed_scf0030.1_g073530.1	Qgl_scf0010.1_g114230.1	AT4G00335.3	AT4G00335.3	3.26504e-06	14	2	6	annual	13	11	5.59506e-06	14	2	7	annual	13	11	5.66509e-05	13	9	5	annual	12	1	1.46691e-06	12	10	4	annual	11	1	7.08888e-09	12	3	5	annual	11	12	1.4375e-10	14	2	8	annual	13	11	0.000651282	13	10
OG0002306	Lthed_scf0070.1_g085730.1	Qgl_scf0080.1_g077650.1	AT5G12890.1	AT5G12890.1	0.000396495	15	11	3	annual	14	8	2.60877e-07	13	11	5	annual	12	8	0.999999	13	2	4	arrhythmic	12	6	0.000147701	14	14	5	annual	13	5	0.000200371	6	1	3	half-annual	6	10	3.11253e-08	13	8	8	annual	12	5	0.000324157	13	13
OG0002310	Lthed_scf0100.1_g007910.1	Qgl_scf0100.1_g097890.1	AT5G19070.1	AT5G19070.1	0.0683204	21	17	10	arrhythmic	19	1	3.00419e-07	12	12	6	annual	11	9	0.00450529	13	1	3	annual	12	5	0.0148766	15	15	6	arrhythmic	14	6	3.02038e-05	12	12	6	annual	11	9	5.46043e-07	13	10	8	annual	12	7	0.00424664	14	13
OG0002311	Lthed_scf0100.1_g006000.1	Qgl_scf0100.1_g099480.1	AT5G45190.3	AT4G19600.1	0.0350698	12	6	8	arrhythmic	11	3	0.999282	6	3	2	arrhythmic	6	12	0.985031	8	4	5	arrhythmic	7	8	0.344463	23	13	19	arrhythmic	21	4	0.615287	11	5	10	arrhythmic	10	2	0.225195	10	4	4	arrhythmic	9	1	0.00939039	12	4
OG0002315	Lthed_scf0100.1_g041580.1	Qgl_scf0100.1_g065760.1	AT3G23980.1	AT3G23980.1	0.000194975	12	8	7	annual	11	5	0.275472	13	12	6	arrhythmic	12	9	0.0207989	10	3	9	arrhythmic	9	7	0.0240536	7	1	4	arrhythmic	6	5	0.402269	12	8	10	arrhythmic	11	5	0.387716	12	1	4	arrhythmic	11	10	0.0641867	13	13
OG0002317	Lthed_scf0100.1_g001810.1	Qgl_scf0100.1_g103500.1	AT1G04200.1	AT1G04200.1	0.0107176	14	2	11	arrhythmic	13	11	0.0140906	13	2	8	arrhythmic	12	11	0.0711131	13	1	1	arrhythmic	12	5	0.00613255	7	1	3	half-annual	6	5	0.0133302	13	1	11	arrhythmic	12	10	9.85379e-05	14	1	9	annual	13	10	0.13846	14	8
OG0002321	Lthed_scf0100.1_g041930.1	Qgl_scf0100.1_g065310.1			0.249996	11	2	7	arrhythmic	10	11	0.228411	23	23	9	arrhythmic	21	7	0.745194	23	23	5	arrhythmic	21	1	0.00469362	11	10	6	annual	10	1	0.00238757	11	3	5	annual	10	12	0.00160903	12	2	6	annual	11	11	0.0514647	14	10
OG0002322	Lthed_scf0020.1_g022900.1	Qgl_scf0030.1_g167110.1	AT1G55110.3	AT1G55110.3	3.31346e-05	13	4	5	annual	12	1	1.04992e-05	13	3	10	annual	12	12	1.33867e-05	12	10	5	annual	11	1	0.000674902	15	8	4	annual	14	12	0.679974	12	2	5	arrhythmic	11	11	4.0597e-08	14	2	8	annual	13	11	6.16267e-05	14	8
OG0002325	Lthed_scf0020.1_g073110.1	Qgl_scf0030.1_g108970.1	AT1G16010.3	AT1G16010.3	0.0311661	15	4	9	arrhythmic	14	1	0.177228	20	2	12	arrhythmic	18	11	0.455158	14	11	8	arrhythmic	13	2	0.029756	17	13	1	arrhythmic	16	4	0.150193	17	3	8	arrhythmic	16	12	0.000710055	12	4	5	annual	11	1	0.00271553	13	13
OG0002326	Lthed_scf0020.1_g075430.1	Qgl_scf0030.1_g107270.1	AT2G24130.2	AT2G24130.2	0.015522	13	11	3	arrhythmic	12	8	0.000339306	13	11	4	annual	12	8	0.044208	13	1	7	arrhythmic	12	5	0.0379039	12	3	8	arrhythmic	11	7	1.75864e-09	12	10	6	annual	11	7	0.00014719	12	1	3	annual	11	10	0.000269613	12	3
OG0002329	Lthed_scf0040.1_g002280.1	Qgl_scf0050.1_g130840.1	AT5G05230.1	AT5G05230.1	0.000178388	13	10	7	annual	12	7	1.61727e-05	13	9	8	annual	12	6	2.58702e-05	14	2	11	annual	13	6	2.22789e-06	13	4	6	annual	12	8	0.185337	7	4	2	arrhythmic	6	1	1.63825e-06	13	13	4	annual	12	10	0.326556	13	10
OG0002343	Lthed_scf0100.1_g071780.1	Qgl_scf0100.1_g042710.1	AT3G51150.1	AT5G66310.3	0.000197476	14	8	9	annual	13	5	0.00279257	13	12	5	annual	12	9	0.38948	7	7	4	arrhythmic	6	11	0.15821	8	7	3	arrhythmic	7	11	0.00838179	6	1	4	half-annual	6	10	1.16275e-07	13	10	7	annual	12	7	9.84465e-06	13	7
OG0002345	Lthed_scf0070.1_g031810.1	Qgl_scf0080.1_g025950.1	AT1G65420.1	AT1G65420.1	0.345752	13	10	6	arrhythmic	12	7	0.000471241	12	1	3	annual	11	10	3.27151e-06	14	4	4	annual	13	8	0.00482757	12	6	4	annual	11	10	0.288582	6	6	3	arrhythmic	6	3	0.981248	18	5	15	arrhythmic	17	2	0.928836	7	5
OG0002346	Lthed_scf0120.1_g049100.1	Qgl_scf0120.1_g044270.1	AT2G22410.1	AT2G22410.1	0.861189	14	11	6	arrhythmic	13	8	0.898526	23	1	16	arrhythmic	21	10	0.0612718	13	7	6	arrhythmic	12	11	0.00970651	13	7	1	annual	12	11	0.00415812	7	4	4	half-annual	6	1	0.215359	15	3	6	arrhythmic	14	12	0.181365	14	12
OG0002353	Lthed_scf0010.1_g169100.1	Qgl_scf0020.1_g165210.1	AT2G33670.1	AT2G33670.1	0.632481	7	7	1	arrhythmic	6	4	0.242635	11	7	6	arrhythmic	10	4	0.472212	5	4	4	arrhythmic	5	8	0.945312	7	4	4	arrhythmic	6	8	7.80407e-05	12	6	1	annual	11	3	1.41957e-06	15	4	6	annual	14	1	1.22725e-05	14	11
OG0002361	Lthed_scf0080.1_g063870.1	Qgl_scf0070.1_g053790.1	AT1G53200.1	AT1G53200.1	0.414075	7	3	2	arrhythmic	6	12	7.62591e-07	13	3	10	annual	12	12	0.0485211	6	5	4	arrhythmic	6	9	0.559563	4	1	2	arrhythmic	4	5	0.00110815	12	4	5	annual	11	1	4.97045e-07	13	4	6	annual	12	1	0.0011099	14	11
OG0002362	Lthed_scf0010.1_g109770.1	Qgl_scf0020.1_g105340.1	AT4G29960.1	AT4G29960.1	5.62132e-06	15	1	8	annual	14	10	3.01921e-05	13	3	9	annual	12	12	0.276123	13	9	7	arrhythmic	12	1	0.0420062	17	10	2	arrhythmic	16	1	7.94492e-06	13	3	7	annual	12	12	1.88738e-06	14	3	9	annual	13	12	0.0600297	13	13
OG0002365	Lthed_scf0120.1_g065130.1	Qgl_scf0120.1_g057750.1	AT4G32551.1	AT4G32551.1	0.0613817	13	3	12	arrhythmic	12	12	0.00153259	13	3	9	annual	12	12	0.160709	15	8	10	arrhythmic	14	12	0.639162	23	23	7	arrhythmic	21	1	7.67483e-08	12	4	4	annual	11	1	0.00790637	13	2	12	annual	12	11	9.12569e-06	12	11
OG0002374	Lthed_scf0010.1_g062990.1	Qgl_scf0020.1_g062140.1	AT3G27160.1	AT3G27160.1	0.975888	7	6	3	arrhythmic	6	3	0.179734	13	13	4	arrhythmic	12	10	0.00289122	15	3	8	annual	14	7	0.00433415	11	5	6	annual	10	9	8.33602e-06	12	7	4	annual	11	4	0.268163	12	8	5	arrhythmic	11	5	7.23412e-06	13	13
OG0002386	Lthed_scf0100.1_g062700.1	Qgl_scf0100.1_g050540.1	AT2G38820.2	AT2G38820.2	0.97393	13	2	8	arrhythmic	12	11	0.735542	23	1	18	arrhythmic	21	10	0.998091	15	10	14	arrhythmic	14	1	1	13	12	12	arrhythmic	12	3	3.38149e-11	13	1	7	annual	12	10	0.521928	10	1	3	arrhythmic	9	10	0.105767	14	12
OG0002398	Lthed_scf0010.1_g037760.1	Qgl_scf0020.1_g036120.1	AT3G24450.1	AT3G24450.1	1	2	1	1	arrhythmic	2	10	0.999984	11	2	3	arrhythmic	10	11	0.999931	14	13	9	arrhythmic	13	4	1	23	14	14	arrhythmic	21	5	0.419584	13	13	6	arrhythmic	12	10	0.000272088	13	1	3	annual	12	10	0.000195642	14	14
OG0002401	Lthed_scf0090.1_g073030.1	Qgl_scf0060.1_g038860.1	AT2G31280.1	AT2G31280.1	0.00160022	12	5	8	annual	11	2	2.49804e-05	13	4	8	annual	12	1	0.0400252	14	12	5	arrhythmic	13	3	0.0613667	12	1	7	arrhythmic	11	5	0.055154	23	6	7	arrhythmic	21	3	0.120282	14	6	4	arrhythmic	13	3	0.0140836	14	14
OG0002405	Lthed_scf0070.1_g035560.1	Qgl_scf0080.1_g029630.1	AT5G07740.1	AT5G07740.1	0.0011532	14	8	11	annual	13	5	0.325836	12	12	6	arrhythmic	11	9	0.00587587	14	13	12	annual	13	4	0.000848876	12	3	7	annual	11	7	5.51161e-05	12	8	9	annual	11	5	0.0095392	13	13	4	annual	12	10	3.72604e-05	15	13
OG0002406	Lthed_scf0070.1_g033980.1	Qgl_scf0080.1_g028050.1	AT3G47550.6	AT3G47550.6	0.150049	15	2	4	arrhythmic	14	11	0.0346016	13	4	6	arrhythmic	12	1	0.0574364	15	9	9	arrhythmic	14	1	0.709424	6	4	2	arrhythmic	6	8	0.997621	6	3	2	arrhythmic	6	12	0.587694	6	3	3	arrhythmic	6	12	0.985605	8	5
OG0002409	Lthed_scf0070.1_g022860.1	Qgl_scf0080.1_g017130.1	AT5G62810.1	AT5G62810.1	5.96953e-05	14	4	4	annual	13	1	8.26869e-06	13	3	9	annual	12	12	0.944115	7	1	5	arrhythmic	6	5	0.162774	11	11	7	arrhythmic	10	2	0.0592013	12	5	2	arrhythmic	11	2	3.66346e-07	15	2	8	annual	14	11	0.0160917	14	10
OG0002419	Lthed_scf0120.1_g066810.1	Qgl_scf0120.1_g059180.1	AT4G35785.2	AT4G35785.2	0.0161639	12	12	7	arrhythmic	11	9	0.000707028	12	10	9	annual	11	7	1.18984e-05	14	3	5	annual	13	7	1.60671e-09	13	4	7	annual	12	8	0.641742	7	3	4	arrhythmic	6	12	0.000254283	13	9	10	annual	12	6	0.000541495	13	2
OG0002426	Lthed_scf0040.1_g077750.1	Qgl_scf0050.1_g057780.1	AT3G15010.2	AT3G15010.2	3.27581e-05	15	1	8	annual	14	10	3.12559e-06	13	4	6	annual	12	1	2.26087e-07	13	11	3	annual	12	2	0.387507	23	9	9	arrhythmic	21	12	2.43446e-07	12	4	7	annual	11	1	6.57985e-09	14	3	9	annual	13	12	0.000855589	13	11
OG0002428	Lthed_scf0040.1_g105510.1	Qgl_scf0050.1_g035820.1	AT4G27360.1	AT4G27360.1	0.0197751	12	3	5	arrhythmic	11	12	0.880038	12	2	10	arrhythmic	11	11	0.554953	14	8	5	arrhythmic	13	12	0.114347	9	9	4	arrhythmic	8	12	0.0776843	6	5	2	arrhythmic	6	2	5.42756e-05	11	2	9	annual	10	11	0.000508101	7	3
OG0002429	Lthed_scf0040.1_g109960.1	Qgl_scf0050.1_g031840.1	AT5G54540.1	AT5G54540.1	7.66673e-05	16	3	6	annual	15	12	0.00830226	13	3	11	annual	12	12	0.112419	23	14	19	arrhythmic	21	5	0.0348702	11	10	5	arrhythmic	10	1	5.84991e-05	12	4	3	annual	11	1	2.52129e-06	14	3	8	annual	13	12	0.0197262	7	3
OG0002434	Lthed_scf0010.1_g017490.1	Qgl_scf0020.1_g017780.1	AT4G30380.2	AT4G30380.2	1	2	2	1	arrhythmic	2	11	0.0851794	7	5	3	arrhythmic	6	2	1	13	13	8	arrhythmic	12	4	1	13	4	4	arrhythmic	12	8	0.215258	12	7	11	arrhythmic	11	4	0.0222148	13	8	10	arrhythmic	12	5	0.645524	7	7
OG0002454	Lthed_scf0100.1_g088350.1	Qgl_scf0100.1_g016090.1	AT2G18570.1	AT3G50740.1	0.570174	13	2	7	arrhythmic	12	11	4.29651e-07	13	13	3	annual	12	10	6.51052e-06	13	2	9	annual	12	6	0.000620019	13	6	4	annual	12	10	0.000131071	13	12	9	annual	12	9	0.979596	6	1	3	arrhythmic	6	10	5.66316e-06	13	4
OG0002475	Lthed_scf0010.1_g133290.1	Qgl_scf0020.1_g125490.1	AT1G71840.1	AT1G71840.1	0.0389592	13	5	4	arrhythmic	12	2	1.18477e-08	13	4	7	annual	12	1	2.81266e-07	14	8	5	annual	13	12	6.55344e-06	13	9	7	annual	12	12	0.0148693	15	4	6	arrhythmic	14	1	4.20896e-05	13	4	7	annual	12	1	1.21485e-06	13	10
OG0002477	Lthed_scf0010.1_g198490.1	Qgl_scf0020.1_g192100.1	AT5G26040.2	AT5G26040.2	7.02132e-05	12	12	3	annual	11	9	9.53669e-10	14	11	5	annual	13	8	0.0118279	23	15	21	arrhythmic	21	6	0.172855	8	2	2	arrhythmic	7	6	0.000932827	6	4	4	half-annual	6	1	0.20029	11	3	6	arrhythmic	10	12	0.0515553	7	3
OG0002478	Lthed_scf0010.1_g182460.1	Qgl_scf0020.1_g176910.1	AT1G19600.1	AT1G19600.1	1.5081e-06	14	11	6	annual	13	8	0.000387654	13	9	11	annual	12	6	8.78045e-05	13	4	4	annual	12	8	0.0132996	15	2	6	arrhythmic	14	6	0.00221175	18	6	13	arrhythmic	17	3	4.38041e-06	14	7	9	annual	13	4	0.157245	12	2
OG0002479	Lthed_scf0010.1_g096670.1	Qgl_scf0020.1_g092680.1	AT1G67090.1	AT5G38410.1	0.964645	7	6	3	arrhythmic	6	3	0.620815	23	19	8	arrhythmic	21	3	0.0380385	22	3	6	arrhythmic	20	7	0.0534989	11	5	6	arrhythmic	10	9	0.00235553	10	8	4	annual	9	5	0.0111102	23	20	2	arrhythmic	21	4	0.00140288	13	13
OG0002487	Lthed_scf0010.1_g025020.1	Qgl_scf0020.1_g024280.1	AT4G19810.2	AT4G19810.2	0.0133668	13	9	10	arrhythmic	12	6	0.423953	21	17	9	arrhythmic	19	1	0.0111504	12	3	6	arrhythmic	11	7	0.0738632	7	3	3	arrhythmic	6	7	0.970744	11	9	3	arrhythmic	10	6	0.980691	12	10	3	arrhythmic	11	7	1.89236e-05	12	2
OG0002493	Lthed_scf0030.1_g096150.1	Qgl_scf0010.1_g086120.1	AT3G52240.1	AT3G52240.1	0.0169204	12	12	6	arrhythmic	11	9	0.0520927	13	12	2	arrhythmic	12	9	2.39063e-05	14	3	7	annual	13	7	0.0237675	14	3	7	arrhythmic	13	7	0.104007	6	5	2	arrhythmic	6	2	6.66211e-06	13	4	4	annual	12	1	0.0574823	17	15
OG0002496	Lthed_scf0060.1_g025010.1	Qgl_scf0090.1_g091830.1	AT5G22640.3	AT5G22640.1	0.242182	7	5	4	arrhythmic	6	2	0.495732	6	1	3	arrhythmic	6	10	0.991568	23	7	14	arrhythmic	21	11	0.329801	11	5	6	arrhythmic	10	9	0.77925	7	5	3	arrhythmic	6	2	0.321564	13	7	8	arrhythmic	12	4	1.18135e-05	13	10
OG0002507	Lthed_scf0110.1_g095810.1	Qgl_scf0110.1_g004430.1	AT3G53490.1	AT3G53490.1	0.785006	9	7	1	arrhythmic	8	4	0.000154645	13	4	7	annual	12	1	0.351956	14	9	4	arrhythmic	13	1	7.0443e-08	12	11	5	annual	11	2	0.0189154	6	5	2	arrhythmic	6	2	0.00137453	12	5	3	annual	11	2	0.519881	6	5
OG0002508	Lthed_scf0110.1_g091060.1	Qgl_scf0110.1_g008960.1	AT5G03330.2	AT5G03330.2	0.00145514	12	4	8	annual	11	1	6.06389e-11	13	3	8	annual	12	12	3.00744e-05	14	10	7	annual	13	1	9.14314e-06	13	11	5	annual	12	2	0.000287693	12	4	8	annual	11	1	8.91851e-09	13	4	7	annual	12	1	2.28151e-05	14	9
OG0002510	Lthed_scf0110.1_g027190.1	Qgl_scf0110.1_g059420.1	AT3G10740.4	AT3G10740.4	0.000546367	12	10	6	annual	11	7	0.000167582	14	9	7	annual	13	6	0.00021539	14	13	11	annual	13	4	0.0863261	14	1	8	arrhythmic	13	5	0.00031652	12	10	5	annual	11	7	2.22144e-05	13	12	4	annual	12	9	0.0101366	13	1
OG0002516	Lthed_scf0020.1_g124950.1	Qgl_scf0030.1_g053170.1	AT1G30460.1	AT1G30460.1	0.000643184	14	3	8	annual	13	12	1.59164e-08	13	3	9	annual	12	12	0.00146506	13	12	2	annual	12	3	0.00283125	13	9	6	annual	12	12	0.000550053	12	4	4	annual	11	1	5.8246e-10	13	3	8	annual	12	12	0.0227139	13	12
OG0002517	Lthed_scf0020.1_g140510.1	Qgl_scf0030.1_g039660.1	AT5G47750.1	AT5G47750.1	0.027089	13	3	11	arrhythmic	12	12	0.131181	13	3	11	arrhythmic	12	12	0.000992674	13	8	6	annual	12	12	0.000908398	12	10	4	annual	11	1	0.0120755	13	3	9	arrhythmic	12	12	0.0806027	7	2	5	arrhythmic	6	11	0.00318364	14	10
OG0002529	Lthed_scf0110.1_g025720.1	Qgl_scf0110.1_g060160.1	AT2G40830.4	AT2G40830.4	0.0080977	11	3	2	annual	10	12	2.40931e-06	13	2	3	annual	12	11	3.55454e-07	13	7	4	annual	12	11	4.18605e-10	12	7	4	annual	11	11	0.00317876	13	3	3	annual	12	12	9.38744e-06	13	2	3	annual	12	11	1.20053e-05	12	10
OG0002534	Lthed_scf0110.1_g078590.1	Qgl_scf0110.1_g017320.1	AT2G36270.2	AT2G36270.2	1	2	2	1	arrhythmic	2	11	1	2	2	1	arrhythmic	2	11	1	13	13	8	arrhythmic	12	4	0.999999	7	1	3	arrhythmic	6	5	0.102411	6	1	4	arrhythmic	6	10	0.977051	6	2	4	arrhythmic	6	11	0.0883382	15	1
OG0002535	Lthed_scf0110.1_g082130.1	Qgl_scf0110.1_g014870.1	AT3G53030.1	AT3G53030.1	7.096e-05	12	12	3	annual	11	9	3.23353e-06	13	12	4	annual	12	9	0.0147803	15	12	13	arrhythmic	14	3	0.120006	11	4	6	arrhythmic	10	8	0.00209526	12	11	4	annual	11	8	1.42064e-07	13	12	4	annual	12	9	0.966741	15	12
OG0002540	Lthed_scf0110.1_g050720.1	Qgl_scf0110.1_g041900.1	AT3G11950.5	AT3G11950.5	0.214394	12	8	7	arrhythmic	11	5	8.95404e-05	13	13	3	annual	12	10	0.00122096	12	3	9	annual	11	7	1.72359e-08	12	4	7	annual	11	8	0.00694692	12	7	10	annual	11	4	0.0251805	6	2	2	arrhythmic	6	11	0.00379128	13	13
OG0002567	Lthed_scf0040.1_g110890.1	Qgl_scf0050.1_g031160.1	AT5G48150.4	AT5G48150.4	0.962626	9	7	1	arrhythmic	8	4	0.100359	7	1	3	arrhythmic	6	10	0.00285464	23	4	9	arrhythmic	21	8	0.864501	6	3	4	arrhythmic	6	7	0.0372451	11	6	2	arrhythmic	10	3	0.614781	16	10	10	arrhythmic	15	7	0.155236	10	5
OG0002577	Lthed_scf0100.1_g061660.1	Qgl_scf0100.1_g009600.1			0.000286243	13	4	6	annual	12	1	1.09249e-06	13	2	10	annual	12	11	0.541672	14	1	13	arrhythmic	13	5	0.868403	4	1	2	arrhythmic	4	5	0.000448169	12	3	9	annual	11	12	0.170008	8	6	3	arrhythmic	7	3	0.0044242	15	4
OG0002582	Lthed_scf0080.1_g105530.1	Qgl_scf0070.1_g006430.1	AT5G20810.2	AT5G20810.1	1	14	8	12	arrhythmic	13	5	9.15683e-05	12	12	10	annual	11	9	0.020372	20	13	13	arrhythmic	18	4	0.261471	23	14	12	arrhythmic	21	5	0.017116	12	1	2	arrhythmic	11	10	0.000197171	14	11	6	annual	13	8	0.0718523	15	4
OG0002624	Lthed_scf0030.1_g024350.1	Qgl_scf0010.1_g167550.1	AT1G45616.1	AT1G45616.1	0.00210603	12	4	6	annual	11	1	0.091639	11	10	2	arrhythmic	10	7	0.0434543	12	4	7	arrhythmic	11	8	0.00531168	23	3	4	arrhythmic	21	7	0.114902	13	3	10	arrhythmic	12	12	0.988146	4	3	2	arrhythmic	4	12	0.307585	14	3
OG0002676	Lthed_scf0080.1_g098260.1	Qgl_scf0070.1_g012520.1	AT5G53130.1	AT5G53130.1	0.984181	4	3	2	arrhythmic	4	12	6.22419e-05	13	10	7	annual	12	7	1	14	13	9	arrhythmic	13	4	4.76471e-06	13	3	8	annual	12	7	0.12033	6	6	1	arrhythmic	6	3	0.0121337	14	13	2	arrhythmic	13	10	0.00100556	14	13
OG0002680	Lthed_scf0090.1_g017430.1	Qgl_scf0060.1_g097600.1	AT5G53390.1	AT3G49210.1	1	13	10	5	arrhythmic	12	7	1	6	6	2	arrhythmic	6	3	0.231518	15	12	9	arrhythmic	14	3	0.00257909	11	5	6	annual	10	9	2.68712e-05	12	10	5	annual	11	7	9.64331e-06	13	9	7	annual	12	6	3.36669e-06	13	1
OG0002749	Lthed_scf0110.1_g019610.1	Qgl_scf0110.1_g065900.1	AT1G80270.5	AT1G80270.5	0.303968	13	1	9	arrhythmic	12	10	0.0973531	14	12	13	arrhythmic	13	9	0.00564015	13	8	5	annual	12	12	0.000640095	16	7	5	annual	15	11	0.0163791	12	7	3	arrhythmic	11	4	0.013721	12	8	5	arrhythmic	11	5	2.53624e-05	12	12
OG0002750	Lthed_scf0070.1_g027540.1	Qgl_scf0080.1_g022030.1	AT5G13050.1	AT5G13050.1	0.0034489	7	1	3	half-annual	6	10	2.33935e-05	13	1	3	annual	12	10	0.141784	19	1	2	arrhythmic	17	5	9.5492e-05	12	4	7	annual	11	8	0.00163032	12	7	10	annual	11	4	9.09921e-07	13	10	7	annual	12	7	0.0770468	13	13
OG0002752	Lthed_scf0090.1_g022660.1	Qgl_scf0060.1_g090910.1	AT1G01490.2	AT5G52740.1	0.00128127	12	11	7	annual	11	8	1.97183e-06	14	9	7	annual	13	6	1.73157e-06	13	3	7	annual	12	7	5.86854e-07	13	4	5	annual	12	8	0.0581251	12	9	11	arrhythmic	11	6	0.000643361	15	9	8	annual	14	6	0.0008919	12	3
OG0002760	Lthed_scf0090.1_g064680.1	Qgl_scf0060.1_g046890.1	AT1G77590.1	AT1G77590.1	0.0184834	14	11	6	arrhythmic	13	8	0.00139	14	8	9	annual	13	5	0.000728034	16	3	10	annual	15	7	0.017388	23	23	2	arrhythmic	21	1	0.176111	15	4	7	arrhythmic	14	1	0.162236	13	8	6	arrhythmic	12	5	0.00120357	13	12
OG0002761	Lthed_scf0090.1_g064300.1	Qgl_scf0060.1_g047080.1	AT4G08330.1	AT4G08330.1	0.0126303	16	3	8	arrhythmic	15	12	8.8044e-07	13	3	10	annual	12	12	0.164023	12	9	11	arrhythmic	11	1	0.00267752	13	11	3	annual	12	2	0.110271	6	5	2	arrhythmic	6	2	0.000142202	13	3	5	annual	12	12	0.305009	7	3
OG0002764	Lthed_scf0090.1_g038980.1	Qgl_scf0060.1_g072400.1	AT5G16660.1	AT5G16660.1	0.00640109	10	6	3	annual	9	3	0.093917	21	5	7	arrhythmic	19	2	0.661169	7	1	4	arrhythmic	6	5	0.00078662	13	9	6	annual	12	12	0.183348	19	15	8	arrhythmic	17	11	0.00051793	13	11	5	annual	12	8	0.524853	7	5
OG0002766	Lthed_scf0090.1_g011110.1	Qgl_scf0060.1_g106700.1	AT5G17560.1	AT5G17560.1	0.00378764	12	12	6	annual	11	9	0.0646264	12	1	11	arrhythmic	11	10	3.09745e-05	14	3	10	annual	13	7	0.0157496	10	9	4	arrhythmic	9	12	0.408578	6	5	3	arrhythmic	6	2	0.366247	13	7	6	arrhythmic	12	4	0.000166437	15	10
OG0002768	Lthed_scf0090.1_g014760.1	Qgl_scf0060.1_g103210.1	AT4G27780.1	AT4G27780.1	0.32365	18	8	13	arrhythmic	17	5	0.983406	14	12	4	arrhythmic	13	9	0.00318557	12	8	10	annual	11	12	0.0314094	18	10	14	arrhythmic	17	1	0.513198	13	12	12	arrhythmic	12	9	0.508641	7	6	5	arrhythmic	6	3	0.0261284	20	12
OG0002779	Lthed_scf0050.1_g016870.1	Qgl_scf0040.1_g018390.1	AT1G70000.2	AT1G70000.2	0.992248	4	3	2	arrhythmic	4	12	0.000392602	14	8	6	annual	13	5	0.0195808	7	5	1	arrhythmic	6	9	0.0975101	7	3	3	arrhythmic	6	7	0.0616592	12	5	3	arrhythmic	11	2	0.150688	13	3	11	arrhythmic	12	12	0.000133591	13	11
OG0002782	Lthed_scf0050.1_g014670.1	Qgl_scf0040.1_g016450.1	AT1G69830.1	AT1G69830.1	1.84155e-07	14	3	8	annual	13	12	3.1934e-10	13	4	7	annual	12	1	2.81802e-08	13	12	4	annual	12	3	1.24254e-06	12	10	8	annual	11	1	0.000148878	12	5	2	annual	11	2	1.00897e-09	14	4	6	annual	13	1	0.000230407	12	11
OG0002788	Lthed_scf0050.1_g031150.1	Qgl_scf0040.1_g038490.1	AT1G67420.2	AT1G67420.2	0.000953598	7	2	4	half-annual	6	11	3.96974e-05	14	2	6	annual	13	11	2.01191e-05	13	1	7	annual	12	5	1.68039e-05	12	1	6	annual	11	5	0.00148901	6	3	2	half-annual	6	12	0.331256	5	2	3	arrhythmic	5	11	0.305915	7	6
OG0002795	Lthed_scf0080.1_g006610.1	Qgl_scf0070.1_g109900.1	AT4G38470.2	AT4G38470.2	0.000194635	13	9	7	annual	12	6	4.13019e-05	13	12	3	annual	12	9	0.0270565	14	13	6	arrhythmic	13	4	0.418574	6	4	3	arrhythmic	6	8	0.0191663	11	4	4	arrhythmic	10	1	0.000823038	13	9	6	annual	12	6	6.07613e-06	13	11
OG0002796	Lthed_scf0080.1_g011810.1	Qgl_scf0070.1_g103990.1	AT4G34960.1	AT4G34960.1	0.0075346	13	9	7	annual	12	6	0.0116549	10	4	4	arrhythmic	9	1	0.136152	14	13	8	arrhythmic	13	4	0.000803852	12	2	9	annual	11	6	0.0125699	12	1	2	arrhythmic	11	10	0.180901	13	10	9	arrhythmic	12	7	0.410812	7	5
OG0002800	Lthed_scf0080.1_g019880.1	Qgl_scf0070.1_g092830.1	AT4G39120.1	AT4G39120.1	0.00909979	13	9	8	annual	12	6	0.00828245	12	12	5	annual	11	9	0.0163316	14	13	10	arrhythmic	13	4	0.0347089	13	13	10	arrhythmic	12	4	0.00392815	6	1	4	half-annual	6	10	0.0101592	13	10	7	arrhythmic	12	7	0.0249595	13	13
OG0002801	Lthed_scf0080.1_g021330.1	Qgl_scf0070.1_g091310.1	AT2G21660.2	AT2G21660.2	0.280359	12	3	10	arrhythmic	11	12	0.00361817	13	2	10	annual	12	11	0.000139784	15	8	10	annual	14	12	0.116539	12	11	3	arrhythmic	11	2	0.0215447	12	3	5	arrhythmic	11	12	3.03104e-08	13	3	8	annual	12	12	0.00280312	13	10
OG0002802	Lthed_scf0080.1_g022450.1	Qgl_scf0070.1_g089480.1	AT1G11760.1	AT1G11760.1	0.0944043	13	6	2	arrhythmic	12	3	0.384046	23	8	3	arrhythmic	21	5	0.00281081	14	11	2	annual	13	2	0.0416325	13	8	9	arrhythmic	12	12	1.01566e-05	12	5	7	annual	11	2	0.0528415	12	6	6	arrhythmic	11	3	0.00213059	13	10
OG0002805	Lthed_scf0080.1_g027980.1	Qgl_scf0070.1_g083020.1	AT2G15900.1	AT2G15900.1	0.583994	13	12	1	arrhythmic	12	9	0.000907535	7	2	4	half-annual	6	11	0.385854	12	4	6	arrhythmic	11	8	0.913277	4	2	2	arrhythmic	4	6	0.0541967	10	4	4	arrhythmic	9	1	0.39032	10	3	7	arrhythmic	9	12	0.996153	6	5
OG0002807	Lthed_scf0080.1_g030540.1	Qgl_scf0070.1_g079360.1	AT3G19130.1	AT3G19130.1	1.36757e-06	13	2	6	annual	12	11	0.0036222	15	2	6	annual	14	11	0.00518339	13	4	10	annual	12	8	0.000595069	13	4	9	annual	12	8	0.00278314	12	4	4	annual	11	1	4.10595e-08	13	2	9	annual	12	11	1.22733e-08	13	10
OG0002809	Lthed_scf0080.1_g075900.1	Qgl_scf0070.1_g036380.1	AT2G01080.1	AT2G01080.1	0.000440062	11	8	6	annual	10	5	0.114789	12	12	1	arrhythmic	11	9	0.0477965	12	1	5	arrhythmic	11	5	0.990006	13	12	11	arrhythmic	12	3	0.00247791	12	6	10	annual	11	3	0.00561828	12	6	10	annual	11	3	0.00914911	14	2
OG0002811	Lthed_scf0080.1_g058890.1	Qgl_scf0070.1_g057070.1	AT2G14260.1	AT2G14260.1	0.0183325	14	4	4	arrhythmic	13	1	0.18044	12	6	6	arrhythmic	11	3	0.546545	6	1	2	arrhythmic	6	5	0.446698	11	3	8	arrhythmic	10	7	0.0515962	13	3	12	arrhythmic	12	12	1.00552e-06	15	3	10	annual	14	12	0.000174993	16	10
OG0002812	Lthed_scf0080.1_g052690.1	Qgl_scf0070.1_g060790.1	AT4G08170.2	AT4G08170.2	0.674411	11	11	3	arrhythmic	10	8	0.118389	12	12	10	arrhythmic	11	9	0.0044977	16	11	13	annual	15	2	0.0240834	14	13	7	arrhythmic	13	4	0.0296487	6	3	3	arrhythmic	6	12	0.000171582	12	1	4	annual	11	10	0.96563	13	1
OG0002813	Lthed_scf0080.1_g049080.1	Qgl_scf0070.1_g063170.1	AT4G33800.2	AT4G33800.2	1	2	1	1	arrhythmic	2	10	1	2	1	1	arrhythmic	2	10	1	13	13	6	arrhythmic	12	4	1	2	2	1	arrhythmic	2	6	0.257155	20	6	15	arrhythmic	18	3	1	13	8	8	arrhythmic	12	5	0.00759371	12	3
OG0002814	Lthed_scf0080.1_g047440.1	Qgl_scf0070.1_g064750.1	AT2G14740.2	AT2G14740.2	0.206811	21	2	18	arrhythmic	19	11	0.179122	21	2	18	arrhythmic	19	11	0.035561	18	14	6	arrhythmic	17	5	0.447692	13	9	9	arrhythmic	12	12	0.00823239	10	4	5	annual	9	1	0.0481909	23	2	18	arrhythmic	21	11	0.117537	13	10
OG0002820	Lthed_scf0090.1_g059480.1	Qgl_scf0060.1_g053130.1	AT1G21640.1	AT1G21640.1	0.000113077	13	4	8	annual	12	1	0.960815	7	2	3	arrhythmic	6	11	0.184824	7	5	1	arrhythmic	6	9	0.123968	12	9	7	arrhythmic	11	12	0.0666006	11	6	5	arrhythmic	10	3	0.00193236	13	4	4	annual	12	1	0.0682675	7	3
OG0002821	Lthed_scf0010.1_g198450.1	Qgl_scf0020.1_g192070.1	AT5G11800.1	AT5G11800.1	0.00953439	15	9	7	annual	14	6	0.0361471	10	2	6	arrhythmic	9	11	0.00549917	13	1	4	annual	12	5	0.00894714	12	1	10	annual	11	5	0.00711773	10	4	3	annual	9	1	0.034585	12	4	1	arrhythmic	11	1	0.947353	7	7
OG0002823	Lthed_scf0080.1_g027800.1	Qgl_scf0070.1_g083270.1	AT2G26500.2	AT2G26500.2	0.32217	4	3	1	arrhythmic	4	12	0.192676	23	8	8	arrhythmic	21	5	0.00239438	16	8	5	annual	15	12	0.0019145	20	7	17	arrhythmic	18	11	0.064155	23	8	2	arrhythmic	21	5	0.0108526	13	5	7	arrhythmic	12	2	0.000155968	13	11
OG0002826	Lthed_scf0030.1_g160480.1	Qgl_scf0010.1_g001270.1	AT2G44350.4	AT2G44350.4	0.000316119	13	4	7	annual	12	1	9.6544e-07	13	4	7	annual	12	1	1.41908e-08	13	9	8	annual	12	1	8.18327e-06	13	10	6	annual	12	1	0.591448	4	3	3	arrhythmic	4	12	0.99372	12	8	7	arrhythmic	11	5	2.09445e-06	14	8
OG0002829	Lthed_scf0070.1_g041710.1	Qgl_scf0080.1_g035400.1	AT5G08130.7	AT5G08130.7	5.47121e-06	11	7	7	annual	10	4	0.00232104	14	6	3	annual	13	3	0.0381155	13	1	3	arrhythmic	12	5	0.0422436	10	4	4	arrhythmic	9	8	0.00109357	12	8	8	annual	11	5	0.079904	7	5	5	arrhythmic	6	2	0.00819394	13	1
OG0002834	Lthed_scf0070.1_g055790.1	Qgl_scf0080.1_g048670.1	AT1G73660.1	AT1G73660.1	0.208772	15	9	7	arrhythmic	14	6	0.0348626	13	4	6	arrhythmic	12	1	0.058868	15	8	9	arrhythmic	14	12	0.513459	18	1	10	arrhythmic	17	5	0.229648	6	4	3	arrhythmic	6	1	0.966345	5	2	2	arrhythmic	5	11	0.000538131	16	8
OG0002835	Lthed_scf0090.1_g078700.1	Qgl_scf0060.1_g033590.1	AT3G58130.2	AT3G58130.2	0.0392997	13	6	10	arrhythmic	12	3	0.610253	12	3	8	arrhythmic	11	12	0.00594295	16	9	6	annual	15	1	0.852758	9	1	4	arrhythmic	8	5	0.392207	20	5	6	arrhythmic	18	2	3.4526e-06	13	5	6	annual	12	2	0.00909623	14	11
OG0002844	Lthed_scf0030.1_g142430.1	Qgl_scf0010.1_g028950.1	AT3G08550.1	AT3G08550.1	0.101409	17	9	11	arrhythmic	16	6	0.0237769	12	3	8	arrhythmic	11	12	0.987419	7	6	4	arrhythmic	6	10	0.141035	10	4	4	arrhythmic	9	8	0.0312092	6	1	4	arrhythmic	6	10	0.0312576	17	8	11	arrhythmic	16	5	0.00176477	14	13
OG0002845	Lthed_scf0030.1_g142090.1	Qgl_scf0010.1_g029320.1	AT4G30870.1	AT4G30870.1	1.66521e-05	13	3	9	annual	12	12	5.83057e-10	13	4	9	annual	12	1	0.73065	12	10	7	arrhythmic	11	1	0.00227109	19	17	9	arrhythmic	17	8	9.89384e-06	12	4	7	annual	11	1	0.0760155	12	4	8	arrhythmic	11	1	0.215159	14	12
OG0002847	Lthed_scf0030.1_g139810.1	Qgl_scf0010.1_g033620.1	AT5G13480.1	AT5G13480.1	0.685999	15	1	8	arrhythmic	14	10	0.00018963	13	4	7	annual	12	1	0.000372465	14	10	8	annual	13	1	0.0286042	23	1	9	arrhythmic	21	5	3.71471e-05	12	6	3	annual	11	3	0.0864637	12	8	1	arrhythmic	11	5	1.48817e-05	14	11
OG0002853	Lthed_scf0030.1_g100490.1	Qgl_scf0010.1_g080140.1	AT4G00170.1	AT4G00170.1	3.55296e-07	14	8	9	annual	13	5	5.81573e-10	13	12	4	annual	12	9	7.17587e-05	14	13	11	annual	13	4	2.82815e-05	13	3	8	annual	12	7	0.00844204	12	7	10	annual	11	4	4.6919e-09	14	10	7	annual	13	7	5.95381e-06	13	1
OG0002855	Lthed_scf0030.1_g096900.1	Qgl_scf0010.1_g085600.1			0.34604	13	11	12	arrhythmic	12	8	0.888115	7	6	4	arrhythmic	6	3	0.064057	23	2	20	arrhythmic	21	6	0.997638	10	1	9	arrhythmic	9	5	0.0439203	16	8	13	arrhythmic	15	5	0.107124	13	11	9	arrhythmic	12	8	0.877707	11	4
OG0002857	Lthed_scf0030.1_g086730.1	Qgl_scf0010.1_g100010.1	AT5G04800.4	AT5G04800.4	0.00386884	13	1	5	annual	12	10	0.0630928	12	2	7	arrhythmic	11	11	0.891809	15	7	9	arrhythmic	14	11	0.00160855	13	7	2	annual	12	11	0.0524157	20	8	8	arrhythmic	18	5	0.00127834	23	10	3	arrhythmic	21	7	0.726373	13	4
OG0002863	Lthed_scf0090.1_g088270.1	Qgl_scf0060.1_g019010.1	AT3G07400.1	AT3G07400.1	0.983893	14	8	13	arrhythmic	13	5	0.0877189	20	4	4	arrhythmic	18	1	0.0497274	16	16	5	arrhythmic	15	7	0.00560044	12	10	10	annual	11	1	0.00669776	11	4	2	annual	10	1	0.0531157	11	2	7	arrhythmic	10	11	0.211983	8	6
OG0002868	Lthed_scf0060.1_g074050.1	Qgl_scf0090.1_g044690.1	AT3G11170.1	AT5G05580.1	0.0621141	12	10	1	arrhythmic	11	7	0.0625662	6	6	2	arrhythmic	6	3	4.69228e-06	14	1	5	annual	13	5	3.81453e-06	14	10	7	annual	13	1	0.000936437	6	1	4	half-annual	6	10	4.16042e-07	13	8	7	annual	12	5	2.97043e-07	13	8
OG0002872	Lthed_scf0060.1_g055920.1	Qgl_scf0090.1_g064360.1	AT1G07420.1	AT1G07420.1	0.00237757	12	8	3	annual	11	5	0.148396	6	6	4	arrhythmic	6	3	1.17953e-07	13	1	9	annual	12	5	0.844155	12	4	9	arrhythmic	11	8	0.0712505	12	8	3	arrhythmic	11	5	2.83014e-05	14	11	5	annual	13	8	0.188865	6	1
OG0002875	Lthed_scf0060.1_g065450.1	Qgl_scf0090.1_g053610.1	AT2G28630.2	AT2G28630.2	1	14	8	9	arrhythmic	13	5	1.2232e-05	13	11	6	annual	12	8	0.695491	8	5	4	arrhythmic	7	9	0.089639	17	13	12	arrhythmic	16	4	0.00049475	6	1	3	half-annual	6	10	1.52049e-08	13	10	6	annual	12	7	0.00880225	7	5
OG0002876	Lthed_scf0060.1_g065650.1	Qgl_scf0090.1_g053270.1	AT1G07705.2	AT1G07705.2	0.0228057	19	1	3	arrhythmic	17	10	0.259125	19	16	7	arrhythmic	17	12	0.121011	23	20	15	arrhythmic	21	11	0.11423	9	4	5	arrhythmic	8	8	0.0251399	19	15	8	arrhythmic	17	11	0.135157	7	7	3	arrhythmic	6	4	0.443933	12	2
OG0002877	Lthed_scf0060.1_g069760.1	Qgl_scf0090.1_g049530.1	AT3G07630.3	AT3G07630.3	0.190483	11	1	7	arrhythmic	10	10	0.128826	13	4	8	arrhythmic	12	1	0.00455316	11	9	7	annual	10	1	0.00176849	6	1	3	half-annual	6	5	0.903648	6	4	5	arrhythmic	6	1	0.0224144	22	22	2	arrhythmic	20	6	7.19346e-05	13	10
OG0002880	Lthed_scf0060.1_g019100.1	Qgl_scf0090.1_g103430.1	AT5G21160.1	AT5G21160.1	0.051138	23	13	19	arrhythmic	21	10	0.0200755	16	13	12	arrhythmic	15	10	0.995019	8	2	1	arrhythmic	7	6	0.0157489	22	6	4	arrhythmic	20	10	0.00256179	13	5	3	annual	12	2	2.90427e-08	14	2	7	annual	13	11	1.06413e-06	13	10
OG0002884	Lthed_scf0060.1_g026120.1	Qgl_scf0040.1_g041860.1	AT1G08190.1	AT1G08190.1	0.00427958	12	7	5	annual	11	4	2.89752e-07	14	2	7	annual	13	11	5.34041e-05	13	11	7	annual	12	2	7.48979e-05	12	10	8	annual	11	1	0.0024078	12	4	6	annual	11	1	0.000366509	13	4	3	annual	12	1	9.01971e-07	13	10
OG0002887	Lthed_scf0060.1_g015860.1	Qgl_scf0090.1_g105960.1	AT4G12070.1	AT4G12070.1	0.152608	7	3	5	arrhythmic	6	12	0.048974	6	4	2	arrhythmic	6	1	0.394823	7	5	1	arrhythmic	6	9	1.2118e-05	15	2	12	annual	14	6	6.5745e-07	12	3	5	annual	11	12	1.3411e-05	14	2	9	annual	13	11	0.15899	7	3
OG0002898	Lthed_scf0050.1_g094820.1	Qgl_scf0040.1_g105130.1	AT2G47300.4	AT2G47300.2	0.099286	13	12	5	arrhythmic	12	9	1.75926e-05	12	12	7	annual	11	9	0.277797	15	2	9	arrhythmic	14	6	0.00455743	19	4	9	arrhythmic	17	8	0.349283	11	8	7	arrhythmic	10	5	0.000514582	13	11	5	annual	12	8	0.895484	15	3
OG0002906	Lthed_scf0010.1_g001740.1	Qgl_scf0020.1_g003520.1	AT4G24270.1	AT4G24270.2	0.000532433	13	7	2	annual	12	4	6.71483e-06	13	3	8	annual	12	12	0.0430059	23	17	10	arrhythmic	21	8	0.0237156	11	5	6	arrhythmic	10	9	4.57815e-05	13	4	4	annual	12	1	5.26374e-06	13	4	5	annual	12	1	0.00839463	13	12
OG0002908	Lthed_scf0040.1_g050660.1	Qgl_scf0050.1_g088160.1	AT5G38520.1	AT5G38520.1	0.268589	7	6	3	arrhythmic	6	3	0.0223938	15	4	5	arrhythmic	14	1	3.75385e-06	12	10	7	annual	11	1	0.0329322	13	7	10	arrhythmic	12	11	0.756762	13	8	3	arrhythmic	12	5	5.5185e-07	14	4	6	annual	13	1	9.35704e-07	13	11
OG0002920	Lthed_scf0090.1_g046240.1	Qgl_scf0060.1_g067030.1	AT1G54130.1	AT1G54130.1	0.000387651	19	16	14	arrhythmic	17	12	0.0529563	12	4	8	arrhythmic	11	1	0.300801	12	9	8	arrhythmic	11	1	0.989134	6	6	4	arrhythmic	6	10	0.0579763	12	5	2	arrhythmic	11	2	0.0530834	11	5	5	arrhythmic	10	2	0.00850316	15	11
OG0002924	Lthed_scf0090.1_g023660.1	Qgl_scf0060.1_g089760.1	AT4G25640.1	AT4G25640.1	0.00886154	19	8	16	arrhythmic	17	5	0.000168887	14	12	4	annual	13	9	0.0526037	22	13	12	arrhythmic	20	4	0.00114395	13	1	8	annual	12	5	0.228751	6	1	4	arrhythmic	6	10	0.0487792	14	2	2	arrhythmic	13	11	0.0380614	11	8
OG0002928	Lthed_scf0100.1_g086980.1	Qgl_scf0100.1_g017800.1	AT3G50810.3	AT3G50810.3	0.0231928	19	3	17	arrhythmic	17	12	0.117335	22	4	17	arrhythmic	20	1	0.155781	21	6	15	arrhythmic	19	10	0.00295475	23	10	16	arrhythmic	21	1	0.0257405	7	3	3	arrhythmic	6	12	0.164176	19	3	13	arrhythmic	17	12	0.0428781	6	2
OG0002931	Lthed_scf0040.1_g032970.1	Qgl_scf0050.1_g104650.1	AT1G01820.1	AT1G01820.1	0.0178402	20	6	10	arrhythmic	18	3	0.0120798	20	11	4	arrhythmic	18	8	0.0871648	15	4	9	arrhythmic	14	8	0.00227514	14	5	4	annual	13	9	0.102043	6	4	4	arrhythmic	6	1	0.0711584	14	3	8	arrhythmic	13	12	0.00119448	14	10
OG0002932	Lthed_scf0040.1_g034110.1	Qgl_scf0050.1_g103850.1	AT4G00550.2	AT4G00550.2	2.64485e-07	13	11	6	annual	12	8	0.000813084	12	9	10	annual	11	6	0.912298	3	3	1	arrhythmic	3	7	0.106518	17	13	1	arrhythmic	16	4	0.133379	13	11	8	arrhythmic	12	8	0.0014264	13	2	3	annual	12	11	0.796498	12	8
OG0002937	Lthed_scf0040.1_g048090.1	Qgl_scf0050.1_g089270.1	AT1G07650.1	AT1G07650.1	0.156228	15	3	13	arrhythmic	14	12	0.0236924	13	9	2	arrhythmic	12	6	0.000212423	13	1	6	annual	12	5	1.60149e-05	14	14	12	annual	13	5	0.220882	6	3	5	arrhythmic	6	12	0.000551097	13	4	9	annual	12	1	1.24288e-05	14	9
OG0002939	Lthed_scf0070.1_g092830.1	Qgl_scf0080.1_g086270.1	AT3G59470.2	AT3G59470.2	0.0393979	11	5	6	arrhythmic	10	2	8.70314e-07	12	4	7	annual	11	1	0.00374493	14	12	1	annual	13	3	0.0148956	12	10	8	arrhythmic	11	1	0.056702	11	4	3	arrhythmic	10	1	0.0186342	13	4	4	arrhythmic	12	1	0.0141326	12	11
OG0002940	Lthed_scf0070.1_g090560.1	Qgl_scf0080.1_g084020.1	AT2G31450.1	AT2G31450.1	0.303082	23	9	12	arrhythmic	21	6	3.17359e-05	13	3	9	annual	12	12	0.180947	7	6	4	arrhythmic	6	10	0.0025284	7	7	3	half-annual	6	11	0.971298	6	1	4	arrhythmic	6	10	0.0320804	13	6	5	arrhythmic	12	3	0.019387	7	6
OG0002941	Lthed_scf0100.1_g046420.1	Qgl_scf0100.1_g060060.1	AT5G48820.1	AT5G48820.1	0.465817	7	3	5	arrhythmic	6	12	1.86425e-06	13	4	9	annual	12	1	0.00629511	13	12	2	annual	12	3	0.00958192	13	8	12	annual	12	12	0.0132014	11	6	2	arrhythmic	10	3	4.10072e-06	13	3	10	annual	12	12	0.0123984	13	11
OG0002942	Lthed_scf0100.1_g044630.1	Qgl_scf0100.1_g063320.1	AT1G04760.2	AT1G04760.2	2.57039e-05	12	9	9	annual	11	6	0.0608762	12	12	3	arrhythmic	11	9	0.00457967	14	13	10	annual	13	4	0.661004	6	4	2	arrhythmic	6	8	2.36734e-06	13	11	6	annual	12	8	5.64425e-09	14	10	8	annual	13	7	0.000349446	14	14
OG0002945	Lthed_scf0100.1_g023390.1	Qgl_scf0100.1_g084060.1	AT4G16260.1	AT4G16260.1	5.24327e-06	15	2	6	annual	14	11	2.38868e-05	15	2	6	annual	14	11	0.967999	8	5	4	arrhythmic	7	9	0.0288327	10	3	6	arrhythmic	9	7	3.64715e-05	13	3	7	annual	12	12	0.0288944	6	3	4	arrhythmic	6	12	0.000141217	14	11
OG0002948	Lthed_scf0100.1_g012140.1	Qgl_scf0100.1_g093010.1	AT3G06350.1	AT3G06350.1	0.179537	20	14	11	arrhythmic	18	10	0.0983064	14	12	7	arrhythmic	13	9	0.410812	7	6	6	arrhythmic	6	10	0.0512991	23	15	10	arrhythmic	21	6	0.00680094	6	2	3	half-annual	6	11	3.47222e-12	13	12	4	annual	12	9	0.00097162	13	1
OG0002956	Lthed_scf0100.1_g035850.1	Qgl_scf0100.1_g071630.1	AT2G33470.2	AT2G33470.2	0.22413	23	9	9	arrhythmic	21	6	0.203282	11	1	8	arrhythmic	10	10	0.0133045	13	11	9	arrhythmic	12	2	0.00583934	14	9	8	annual	13	12	0.0112736	12	7	11	arrhythmic	11	4	6.29177e-07	13	10	7	annual	12	7	0.0518001	14	12
OG0002961	Lthed_scf0100.1_g002070.1	Qgl_scf0100.1_g103340.1	AT4G14720.1	AT4G14720.1	0.968844	9	8	8	arrhythmic	8	5	0.0126782	15	14	7	arrhythmic	14	10	0.0924698	16	15	9	arrhythmic	15	6	0.000535233	12	4	6	annual	11	8	0.0737689	7	4	4	arrhythmic	6	1	0.289361	7	3	5	arrhythmic	6	12	0.781357	6	5
OG0002964	Lthed_scf0020.1_g183390.1	Qgl_scf0030.1_g001360.1	AT1G78895.1	AT1G78895.1	0.0589843	19	7	11	arrhythmic	17	4	0.0449656	12	5	8	arrhythmic	11	2	0.000904287	15	2	7	annual	14	6	0.100433	8	1	6	arrhythmic	7	5	0.994866	3	1	2	arrhythmic	3	10	0.120381	13	3	12	arrhythmic	12	12	0.561366	20	14
OG0002966	Lthed_scf0020.1_g005070.1	Qgl_scf0030.1_g185320.1	AT1G17350.5	AT1G17350.5	0.00298375	13	12	4	annual	12	9	0.00313082	14	12	6	annual	13	9	0.00136642	13	1	11	annual	12	5	0.109968	13	7	1	arrhythmic	12	11	0.994248	9	2	3	arrhythmic	8	11	0.106234	13	10	8	arrhythmic	12	7	0.301833	13	6
OG0002967	Lthed_scf0020.1_g005180.1	Qgl_scf0030.1_g185260.1	AT3G14200.1	AT3G14200.1	0.00155591	7	3	3	half-annual	6	12	9.64325e-10	13	3	4	annual	12	12	2.10605e-07	14	9	4	annual	13	1	1.09612e-06	13	10	3	annual	12	1	1.93145e-05	12	3	4	annual	11	12	1.08494e-11	13	2	6	annual	12	11	1.01616e-09	13	10
OG0002970	Lthed_scf0110.1_g011010.1	Qgl_scf0110.1_g074790.1	AT1G52630.1	AT1G52630.1	0.0381849	13	3	9	arrhythmic	12	12	0.0271442	22	2	4	arrhythmic	20	11	0.130699	11	3	4	arrhythmic	10	7	0.99345	13	10	3	arrhythmic	12	1	4.8449e-06	13	3	8	annual	12	12	0.000898659	15	4	6	annual	14	1	0.00513799	12	9
OG0002975	Lthed_scf0020.1_g074850.1	Qgl_scf0030.1_g107760.1	AT5G48930.1	AT5G48930.1	0.0356654	12	10	4	arrhythmic	11	7	0.400125	19	12	18	arrhythmic	17	9	0.0156083	14	13	8	arrhythmic	13	4	0.00239039	13	10	9	annual	12	1	0.0107124	6	3	2	arrhythmic	6	12	0.00503187	14	2	2	annual	13	11	0.0311424	6	2
OG0002978	Lthed_scf0040.1_g029500.1	Qgl_scf0050.1_g108070.1	AT4G12080.1	AT4G12080.1	0.329845	23	9	9	arrhythmic	21	6	0.000231785	13	12	5	annual	12	9	0.00777094	15	12	12	annual	14	3	0.000130045	13	1	9	annual	12	5	0.00139554	17	12	3	annual	16	9	1.53705e-10	14	10	7	annual	13	7	0.000445113	14	4
OG0002980	Lthed_scf0040.1_g023240.1	Qgl_scf0050.1_g113670.1	AT3G54820.1	AT3G54820.1	0.000320293	14	10	6	annual	13	7	1.11765e-08	13	10	7	annual	12	7	1.96945e-08	13	2	7	annual	12	6	3.26403e-07	13	3	8	annual	12	7	0.017273	6	2	2	arrhythmic	6	11	2.56088e-09	13	10	7	annual	12	7	0.000467067	7	5
OG0002982	Lthed_scf0040.1_g016800.1	Qgl_scf0050.1_g119270.1	AT5G02530.1	AT5G59950.3	0.419304	6	6	3	arrhythmic	6	3	0.000834371	13	13	3	annual	12	10	0.529409	7	3	3	arrhythmic	6	7	0.512427	12	11	2	arrhythmic	11	2	0.00305479	6	5	5	half-annual	6	2	0.0017803	17	9	11	annual	16	6	0.275533	14	12
OG0002984	Lthed_scf0040.1_g010980.1	Qgl_scf0050.1_g123860.1	AT2G39805.1	AT2G39805.1	0.00523567	15	1	8	annual	14	10	0.00738121	16	5	4	annual	15	2	0.0805388	15	7	10	arrhythmic	14	11	0.0227752	21	1	13	arrhythmic	19	5	0.0215559	12	6	2	arrhythmic	11	3	0.137246	19	5	3	arrhythmic	17	2	0.524853	7	3
OG0002985	Lthed_scf0040.1_g008950.1	Qgl_scf0050.1_g125610.1	AT2G39950.1	AT2G39950.1	0.0054255	23	16	16	arrhythmic	21	12	0.0152424	5	5	3	arrhythmic	5	2	3.92207e-05	12	6	5	annual	11	10	1.23621e-06	13	6	5	annual	12	10	0.123123	11	11	8	arrhythmic	10	8	0.00957209	13	3	4	annual	12	12	1.61744e-05	13	2
OG0002986	Lthed_scf0040.1_g007060.1	Qgl_scf0050.1_g126680.1	AT3G51880.2	AT3G51880.2	2.72547e-08	13	4	5	annual	12	1	3.16961e-10	13	4	7	annual	12	1	6.97092e-05	12	12	3	annual	11	3	0.00117481	12	10	6	annual	11	1	6.86782e-09	12	4	4	annual	11	1	1.20461e-11	13	3	8	annual	12	12	2.00894e-06	13	11
OG0002987	Lthed_scf0050.1_g095080.1	Qgl_scf0040.1_g105210.1	AT5G27970.3	AT5G27970.3	0.174915	23	16	15	arrhythmic	21	12	0.0720709	13	3	11	arrhythmic	12	12	0.0144361	13	10	7	arrhythmic	12	1	3.28353e-06	13	9	6	annual	12	12	2.87373e-05	12	4	3	annual	11	1	7.30179e-06	14	5	5	annual	13	2	0.000378732	14	10
OG0002990	Lthed_scf0050.1_g103770.1	Qgl_scf0040.1_g123790.1	AT3G05500.1	AT3G05500.1	0.947552	6	6	2	arrhythmic	6	3	0.0517628	13	7	6	arrhythmic	12	4	0.062358	12	2	8	arrhythmic	11	6	0.00105387	13	9	11	annual	12	12	0.0338844	10	5	4	arrhythmic	9	2	0.240639	9	6	5	arrhythmic	8	3	0.513421	10	5
OG0002992	Lthed_scf0100.1_g077490.1	Qgl_scf0100.1_g036490.1	AT3G11220.1	AT3G11220.1	2.87732e-05	14	6	2	annual	13	3	1.22417e-05	12	7	5	annual	11	4	4.43666e-05	13	10	4	annual	12	1	0.0423657	13	8	8	arrhythmic	12	12	9.99746e-05	13	5	6	annual	12	2	0.0150857	14	5	6	arrhythmic	13	2	7.99257e-05	13	12
OG0002996	Lthed_scf0060.1_g129620.1	Qgl_scf0090.1_g003610.1	AT1G65540.3	AT1G65540.3	0.00219918	13	2	9	annual	12	11	0.0155613	13	2	3	arrhythmic	12	11	0.000159172	15	8	10	annual	14	12	2.13943e-06	13	9	7	annual	12	12	0.180303	6	3	2	arrhythmic	6	12	0.000392225	7	7	4	half-annual	6	4	0.000709414	14	8
OG0002999	Lthed_scf0120.1_g047840.1	Qgl_scf0120.1_g043590.1	AT2G48060.2	AT2G48060.2	0.0376004	23	16	16	arrhythmic	21	12	4.78771e-07	13	4	7	annual	12	1	3.39191e-05	12	10	5	annual	11	1	0.0842286	16	6	8	arrhythmic	15	10	0.0331731	12	4	3	arrhythmic	11	1	4.15406e-09	14	2	8	annual	13	11	2.15739e-05	13	11
OG0003001	Lthed_scf0120.1_g057910.1	Qgl_scf0120.1_g051620.1	AT2G47580.1	AT2G47580.1	0.0189127	12	1	3	arrhythmic	11	10	0.640004	22	17	8	arrhythmic	20	1	0.00249964	15	13	13	annual	14	4	0.00104251	12	4	8	annual	11	8	0.211945	10	8	6	arrhythmic	9	5	0.000372409	12	8	9	annual	11	5	0.783374	13	1
OG0003008	Lthed_scf0010.1_g167360.1	Qgl_scf0020.1_g144370.1	AT1G76570.1	AT1G76570.1	3.45452e-06	13	10	7	annual	12	7	2.89797e-08	14	11	6	annual	13	8	0.000505364	14	1	8	annual	13	5	5.81418e-06	12	6	4	annual	11	10	0.16063	12	9	5	arrhythmic	11	6	0.066935	12	11	5	arrhythmic	11	8	0.000319822	12	1
OG0003010	Lthed_scf0010.1_g168160.1	Qgl_scf0020.1_g164120.1	AT2G33620.4	AT2G33620.4	0.0357036	14	3	2	arrhythmic	13	12	0.000344368	13	3	4	annual	12	12	0.000452763	14	8	9	annual	13	12	0.0276105	13	11	1	arrhythmic	12	2	0.753771	15	15	7	arrhythmic	14	11	0.86846	12	5	7	arrhythmic	11	2	3.51145e-05	14	7
OG0003011	Lthed_scf0010.1_g169690.1	Qgl_scf0020.1_g165580.1	AT1G42540.4	AT1G42540.4	0.221496	13	7	5	arrhythmic	12	4	3.32932e-08	13	12	3	annual	12	9	0.333342	7	5	1	arrhythmic	6	9	1.80913e-05	13	12	9	annual	12	3	0.000200217	6	4	3	half-annual	6	1	0.112815	15	7	8	arrhythmic	14	4	0.0201354	14	11
OG0003013	Lthed_scf0030.1_g086410.1	Qgl_scf0020.1_g167080.1	AT5G42330.1	AT5G42330.1	0.199853	18	9	10	arrhythmic	17	6	0.000419276	13	12	4	annual	12	9	0.999998	14	13	8	arrhythmic	13	4	1	13	1	8	arrhythmic	12	5	3.88635e-05	12	7	9	annual	11	4	2.17056e-07	13	10	7	annual	12	7	6.91574e-05	14	12
OG0003020	Lthed_scf0010.1_g179240.1	Qgl_scf0020.1_g173780.1	AT5G42520.1	AT5G42520.1	0.517716	13	10	7	arrhythmic	12	7	0.00310245	12	10	4	annual	11	7	0.000791113	13	3	7	annual	12	7	0.00135773	13	4	4	annual	12	8	0.0315307	12	6	1	arrhythmic	11	3	6.43275e-08	13	5	5	annual	12	2	0.133373	18	15
OG0003025	Lthed_scf0090.1_g029330.1	Qgl_scf0060.1_g080870.1	AT1G68810.1	AT1G68810.1	0.120227	7	2	4	arrhythmic	6	11	0.116848	15	2	9	arrhythmic	14	11	0.000228172	14	9	6	annual	13	1	0.0839776	10	9	7	arrhythmic	9	12	2.13719e-05	12	4	4	annual	11	1	0.0033407	15	2	6	annual	14	11	9.02065e-06	13	10
OG0003026	Lthed_scf0090.1_g028960.1	Qgl_scf0060.1_g081400.1	AT5G49710.3	AT5G49710.3	0.000369362	13	8	5	annual	12	5	0.0113972	13	12	2	arrhythmic	12	9	0.00163603	12	11	7	annual	11	2	0.00623111	11	11	6	annual	10	2	0.500675	7	1	2	arrhythmic	6	10	2.93093e-06	15	9	9	annual	14	6	0.00428447	12	9
OG0003031	Lthed_scf0090.1_g049020.1	Qgl_scf0060.1_g064110.1	AT5G51100.1	AT5G51100.1	0.00616612	13	10	7	annual	12	7	3.71681e-06	13	9	8	annual	12	6	0.00819787	15	2	10	annual	14	6	0.111444	11	10	4	arrhythmic	10	1	0.00219086	12	8	2	annual	11	5	0.280326	12	8	4	arrhythmic	11	5	0.58017	19	7
OG0003039	Lthed_scf0120.1_g054970.1	Qgl_scf0120.1_g049520.1	AT4G32730.5	AT4G32730.5	0.00154536	13	3	9	annual	12	12	2.297e-05	13	2	8	annual	12	11	0.0129051	14	13	2	arrhythmic	13	4	0.0358743	7	7	4	arrhythmic	6	11	1.66234e-05	6	2	3	half-annual	6	11	0.0604577	6	2	4	arrhythmic	6	11	0.00725712	14	12
OG0003040	Lthed_scf0120.1_g052350.1	Qgl_scf0120.1_g047140.1	AT5G10710.1	AT5G10710.1	9.25341e-06	14	4	6	annual	13	1	5.51769e-10	13	3	8	annual	12	12	0.000654612	13	11	3	annual	12	2	6.00728e-05	13	9	5	annual	12	12	1.56166e-07	13	3	8	annual	12	12	3.58992e-08	14	3	6	annual	13	12	0.00400406	14	10
OG0003041	Lthed_scf0120.1_g064700.1	Qgl_scf0120.1_g057370.1	AT5G11450.2	AT5G11450.2	0.286054	13	6	11	arrhythmic	12	3	0.21879	13	13	4	arrhythmic	12	10	0.99799	12	1	3	arrhythmic	11	5	0.285585	13	7	10	arrhythmic	12	11	7.14426e-05	12	8	3	annual	11	5	0.357978	12	8	5	arrhythmic	11	5	0.0246309	13	13
OG0003046	Lthed_scf0090.1_g001040.1	Qgl_scf0060.1_g116500.1	AT1G71270.1	AT1G71270.1	1.18318e-05	13	3	9	annual	12	12	4.45729e-07	13	3	9	annual	12	12	0.562308	13	13	6	arrhythmic	12	4	0.203974	6	1	4	arrhythmic	6	5	0.00460398	13	4	4	annual	12	1	0.00132176	23	12	17	arrhythmic	21	9	0.2932	19	19
OG0003047	Lthed_scf0010.1_g053110.1	Qgl_scf0020.1_g052280.1	AT5G14760.1	AT5G14760.1	1	2	2	1	arrhythmic	2	11	6.70513e-06	13	5	6	annual	12	2	1.20855e-06	13	9	9	annual	12	1	5.4359e-06	13	10	6	annual	12	1	1	2	1	1	arrhythmic	2	10	0.459527	13	4	9	arrhythmic	12	1	4.18113e-05	13	12
OG0003049	Lthed_scf0010.1_g054970.1	Qgl_scf0020.1_g054460.1	AT5G14610.2	AT5G14610.6	0.000166073	12	4	4	annual	11	1	8.31898e-05	13	3	9	annual	12	12	0.0102328	7	3	3	arrhythmic	6	7	0.281125	6	4	3	arrhythmic	6	8	0.00120777	12	5	2	annual	11	2	0.00015105	13	4	7	annual	12	1	3.92119e-06	14	10
OG0003050	Lthed_scf0010.1_g056460.1	Qgl_scf0020.1_g055670.1	AT5G14520.1	AT5G14520.1	0.000131978	12	4	7	annual	11	1	1.63506e-09	14	2	9	annual	13	11	0.0161502	13	9	7	arrhythmic	12	1	3.7443e-07	12	11	4	annual	11	2	4.24475e-07	12	5	5	annual	11	2	1.25574e-05	12	4	8	annual	11	1	2.67602e-07	13	11
OG0003052	Lthed_scf0010.1_g058410.1	Qgl_scf0020.1_g058350.1	AT5G14440.2	AT5G14440.1	0.119507	12	5	7	arrhythmic	11	2	0.62263	5	2	1	arrhythmic	5	11	0.798999	14	2	11	arrhythmic	13	6	0.232682	23	7	5	arrhythmic	21	11	2.78908e-08	12	4	6	annual	11	1	9.06377e-05	14	3	7	annual	13	12	3.12627e-08	13	11
OG0003053	Lthed_scf0010.1_g061280.1	Qgl_scf0020.1_g060380.1	AT3G27260.4	AT3G27260.4	0.00100891	22	2	11	arrhythmic	20	11	0.955783	6	4	3	arrhythmic	6	1	0.867839	6	5	2	arrhythmic	6	9	0.349655	17	2	7	arrhythmic	16	6	0.000854712	12	6	1	annual	11	3	0.0601226	11	5	5	arrhythmic	10	2	1.53366e-06	13	10
OG0003054	Lthed_scf0010.1_g061590.1	Qgl_scf0020.1_g060710.1	AT3G01780.1	AT3G01780.1	0.050817	7	1	4	arrhythmic	6	10	0.0966428	15	12	6	arrhythmic	14	9	0.0627054	13	1	3	arrhythmic	12	5	0.573386	13	1	7	arrhythmic	12	5	0.116776	12	2	1	arrhythmic	11	11	8.18655e-05	14	13	4	annual	13	10	0.414075	7	5
OG0003059	Lthed_scf0120.1_g077900.1	Qgl_scf0120.1_g069490.1	AT5G51760.2	AT5G51760.2	0.0316855	12	12	3	arrhythmic	11	9	0.741401	8	4	7	arrhythmic	7	1	0.172021	21	13	13	arrhythmic	19	4	0.102864	15	14	7	arrhythmic	14	5	0.0119701	11	2	6	arrhythmic	10	11	0.0261394	12	2	6	arrhythmic	11	11	0.0483771	12	5
OG0003066	Lthed_scf0030.1_g056190.1	Qgl_scf0010.1_g133240.1	AT3G22260.1	AT3G22260.1	1.17938e-06	13	4	8	annual	12	1	2.10213e-05	13	4	7	annual	12	1	0.000382811	12	11	7	annual	11	2	0.00219113	13	10	7	annual	12	1	1.5696e-05	12	3	7	annual	11	12	1.65383e-06	14	2	9	annual	13	11	6.87216e-05	15	9
OG0003068	Lthed_scf0100.1_g061220.1	Qgl_scf0100.1_g051630.1	AT5G64070.1	AT5G64070.1	0.0892652	23	21	6	arrhythmic	21	5	0.00218105	13	5	9	annual	12	2	0.928233	6	6	3	arrhythmic	6	10	0.0728121	20	6	1	arrhythmic	18	10	0.900967	4	4	1	arrhythmic	4	1	0.0580207	13	4	6	arrhythmic	12	1	0.0183688	11	1
OG0003071	Lthed_scf0100.1_g062880.1	Qgl_scf0100.1_g050300.1	AT5G24320.1	AT5G24320.1	0.0725133	12	6	7	arrhythmic	11	3	0.0132017	11	5	7	arrhythmic	10	2	0.00109354	14	11	2	annual	13	2	3.36256e-06	13	10	7	annual	12	1	0.0410141	20	4	9	arrhythmic	18	1	0.0045182	13	3	11	annual	12	12	0.0193846	21	3
OG0003073	Lthed_scf0100.1_g070870.1	Qgl_scf0100.1_g043370.1	AT5G10050.1	AT5G10050.1	0.00010752	12	12	4	annual	11	9	2.01574e-07	13	11	7	annual	12	8	4.45252e-06	14	3	6	annual	13	7	3.91796e-05	12	6	3	annual	11	10	0.183143	6	4	4	arrhythmic	6	1	0.116258	21	3	18	arrhythmic	19	12	0.000213054	13	7
OG0003076	Lthed_scf0040.1_g062440.1	Qgl_scf0050.1_g072010.1	AT3G21810.1	AT3G21810.1	0.000998542	13	6	2	annual	12	3	6.24246e-05	13	5	7	annual	12	2	0.0352496	16	3	15	arrhythmic	15	7	0.0012176	14	4	6	annual	13	8	0.00721063	12	5	2	annual	11	2	8.48857e-07	13	4	9	annual	12	1	0.000135497	14	9
OG0003077	Lthed_scf0040.1_g054430.1	Qgl_scf0050.1_g079510.1	AT2G20740.1	AT2G20740.1	0.0408943	12	12	6	arrhythmic	11	9	0.000173196	13	11	5	annual	12	8	0.00140338	13	4	4	annual	12	8	0.0237425	15	2	6	arrhythmic	14	6	0.610309	9	5	5	arrhythmic	8	2	0.265993	19	1	7	arrhythmic	17	10	0.293758	13	5
OG0003079	Lthed_scf0080.1_g105850.1	Qgl_scf0070.1_g005760.1	AT1G74960.3	AT1G74960.3	0.0374496	6	4	3	arrhythmic	6	1	9.78192e-09	13	2	4	annual	12	11	0.11869	17	5	6	arrhythmic	16	9	0.020929	12	5	7	arrhythmic	11	9	0.0130568	6	2	4	arrhythmic	6	11	1.5702e-08	14	2	8	annual	13	11	2.21842e-05	15	9
OG0003080	Lthed_scf0080.1_g107110.1	Qgl_scf0070.1_g003620.1	AT5G20635.1	AT5G20635.1	0.0532618	10	8	6	arrhythmic	9	5	0.144189	20	2	9	arrhythmic	18	11	1	13	1	6	arrhythmic	12	5	0.459654	12	2	8	arrhythmic	11	6	0.0263749	10	8	6	arrhythmic	9	5	9.87357e-05	12	8	6	annual	11	5	0.244733	14	7
OG0003085	Lthed_scf0010.1_g029270.1	Qgl_scf0020.1_g028790.1	AT5G35430.1	AT5G35430.1	0.0211663	20	16	13	arrhythmic	18	12	0.00157014	13	4	5	annual	12	1	0.784237	12	5	9	arrhythmic	11	9	0.040748	23	22	13	arrhythmic	21	12	0.0304635	13	2	6	arrhythmic	12	11	0.595822	15	2	1	arrhythmic	14	11	0.0204163	13	2
OG0003086	Lthed_scf0080.1_g077410.1	Qgl_scf0070.1_g035470.1	AT1G65650.1	AT1G65650.1	0.000522495	16	2	7	annual	15	11	0.246302	19	4	12	arrhythmic	17	1	0.00158757	15	2	6	annual	14	6	0.23256	23	9	15	arrhythmic	21	12	8.458e-05	12	4	8	annual	11	1	0.00421546	13	7	9	annual	12	4	0.093189	13	1
OG0003087	Lthed_scf0120.1_g086590.1	Qgl_scf0120.1_g075800.1	AT1G06780.1	AT1G06780.1	0.00140891	16	4	4	annual	15	1	1.60181e-05	14	3	8	annual	13	12	8.82149e-07	14	10	5	annual	13	1	0.000967756	12	10	7	annual	11	1	0.00206553	13	3	8	annual	12	12	5.0866e-07	14	3	7	annual	13	12	1.88923e-06	13	10
OG0003089	Lthed_scf0090.1_g076440.1	Qgl_scf0060.1_g036580.1	AT1G08620.4	AT1G08620.3	6.82806e-07	13	4	8	annual	12	1	0.0334062	13	2	8	arrhythmic	12	11	0.0145399	7	3	3	arrhythmic	6	7	0.00100153	19	16	17	arrhythmic	17	7	0.00476916	12	4	6	annual	11	1	1.34144e-08	14	4	6	annual	13	1	0.000125938	15	10
OG0003090	Lthed_scf0040.1_g071570.1	Qgl_scf0050.1_g064170.1	AT2G04780.2	AT2G04780.2	0.000385172	13	9	8	annual	12	6	1.33625e-07	13	11	10	annual	12	8	0.00156018	13	1	2	annual	12	5	0.00971656	14	14	10	annual	13	5	0.0002014	11	8	9	annual	10	5	0.000292284	12	8	9	annual	11	5	0.0645772	14	5
OG0003091	Lthed_scf0030.1_g044140.1	Qgl_scf0010.1_g146570.1	AT4G14540.1	AT4G14540.1	0.0481411	12	10	10	arrhythmic	11	7	0.132188	11	2	4	arrhythmic	10	11	0.434153	7	6	5	arrhythmic	6	10	0.643412	15	5	4	arrhythmic	14	9	0.00235881	11	11	8	annual	10	8	2.64121e-06	23	1	20	arrhythmic	21	10	0.311946	13	11
OG0003092	Lthed_scf0030.1_g048340.1	Qgl_scf0010.1_g143290.1	AT3G07650.4	AT3G07650.4	2.38911e-05	16	3	6	annual	15	12	0.0736435	14	8	3	arrhythmic	13	5	0.00208609	14	10	7	annual	13	1	0.0175394	20	2	13	arrhythmic	18	6	4.09039e-05	12	4	3	annual	11	1	7.97022e-10	13	3	9	annual	12	12	0.019251	14	11
OG0003100	Lthed_scf0120.1_g017190.1	Qgl_scf0120.1_g013100.1	AT5G47080.1	AT5G47080.1	0.0182982	18	2	7	arrhythmic	17	11	0.0371994	13	3	11	arrhythmic	12	12	0.0225184	13	11	3	arrhythmic	12	2	9.36024e-06	12	11	4	annual	11	2	0.00842294	6	4	4	half-annual	6	1	0.000209091	14	2	12	annual	13	11	0.00308048	13	11
OG0003105	Lthed_scf0120.1_g003530.1	Qgl_scf0120.1_g003190.1	AT1G32230.6	AT1G32230.3	0.00571616	13	4	4	annual	12	1	3.17543e-05	13	4	8	annual	12	1	0.00157434	7	3	3	half-annual	6	7	0.0225541	13	10	4	arrhythmic	12	1	0.0416033	12	4	6	arrhythmic	11	1	9.00241e-08	13	3	5	annual	12	12	8.23717e-05	14	10
OG0003108	Lthed_scf0010.1_g144810.1	Qgl_scf0020.1_g135200.1	AT4G10970.7	AT4G10970.7	0.445268	11	4	5	arrhythmic	10	1	0.0695878	14	4	8	arrhythmic	13	1	0.0231245	14	10	9	arrhythmic	13	1	0.0308273	13	9	9	arrhythmic	12	12	0.348799	12	5	1	arrhythmic	11	2	0.144647	6	5	3	arrhythmic	6	2	2.89373e-07	12	12
OG0003116	Lthed_scf0040.1_g101180.1	Qgl_scf0050.1_g040140.1	AT4G27450.1	AT4G27450.1	0.0532071	11	3	6	arrhythmic	10	12	0.00745761	14	3	9	annual	13	12	0.0155964	15	8	4	arrhythmic	14	12	0.365	7	3	3	arrhythmic	6	7	2.94192e-05	6	4	4	half-annual	6	1	0.0488758	14	3	8	arrhythmic	13	12	0.0365353	7	3
OG0003120	Lthed_scf0040.1_g119400.1	Qgl_scf0050.1_g021800.1	AT4G22030.1	AT4G22030.1	0.0125323	7	6	3	arrhythmic	6	3	0.0210177	13	7	10	arrhythmic	12	4	1.60645e-05	14	2	8	annual	13	6	1.04672e-08	13	2	7	annual	12	6	0.251062	6	1	3	arrhythmic	6	10	5.69122e-07	14	11	5	annual	13	8	0.000155847	15	14
OG0003121	Lthed_scf0040.1_g121080.1	Qgl_scf0050.1_g020500.1	AT3G20800.1	AT3G20800.1	0.0764032	11	9	7	arrhythmic	10	6	0.126693	23	15	19	arrhythmic	21	11	0.373487	11	6	2	arrhythmic	10	10	0.21062	14	10	10	arrhythmic	13	1	0.00332472	23	20	6	arrhythmic	21	4	0.223287	12	8	10	arrhythmic	11	5	0.992884	16	10
OG0003122	Lthed_scf0040.1_g128420.1	Qgl_scf0050.1_g012010.1	AT1G55900.1	AT1G55900.1	0.354416	15	1	6	arrhythmic	14	10	3.5773e-06	16	16	9	annual	15	12	0.0416101	7	2	3	arrhythmic	6	6	6.74637e-05	14	9	6	annual	13	12	0.110298	12	7	2	arrhythmic	11	4	0.00349057	23	20	2	arrhythmic	21	4	0.00580036	14	12
OG0003125	Lthed_scf0120.1_g082080.1	Qgl_scf0120.1_g072770.1	AT2G25840.2	AT2G25840.2	0.367147	7	6	3	arrhythmic	6	3	0.974777	4	2	2	arrhythmic	4	11	0.0533318	14	3	6	arrhythmic	13	7	0.00726477	12	6	4	annual	11	10	2.30359e-06	14	4	7	annual	13	1	0.0189293	15	4	6	arrhythmic	14	1	0.0164581	16	9
OG0003149	Lthed_scf0100.1_g051310.1	Qgl_scf0100.1_g057460.1	AT2G31970.1	AT2G31970.1	0.00084476	14	9	6	annual	13	6	1.89324e-06	13	11	6	annual	12	8	0.204944	22	19	7	arrhythmic	20	10	0.967219	4	4	3	arrhythmic	4	8	0.0118346	14	10	5	arrhythmic	13	7	2.29393e-06	12	1	4	annual	11	10	0.199306	23	16
OG0003150	Lthed_scf0100.1_g054360.1	Qgl_scf0100.1_g055480.1	AT3G23790.1	AT4G14070.1	0.000725915	13	9	11	annual	12	6	5.26668e-08	14	9	9	annual	13	6	0.000433185	11	5	6	annual	10	9	0.00494886	12	5	5	annual	11	9	0.000585468	14	10	6	annual	13	7	1.77337e-08	13	12	5	annual	12	9	4.53273e-05	15	14
OG0003156	Lthed_scf0100.1_g012860.1	Qgl_scf0100.1_g092080.1	AT2G47900.3	AT2G47900.3	2.93738e-08	12	10	6	annual	11	7	0.101437	15	1	1	arrhythmic	14	10	0.00125845	12	4	5	annual	11	8	2.04407e-07	13	4	4	annual	12	8	0.00118885	11	5	3	annual	10	2	0.000656736	12	4	7	annual	11	1	0.0369912	13	11
OG0003179	Lthed_scf0010.1_g197390.1	Qgl_scf0020.1_g191300.1	AT1G10070.2	AT1G10070.2	0.123889	7	7	1	arrhythmic	6	4	0.000653387	13	8	10	annual	12	5	0.250519	7	5	1	arrhythmic	6	9	4.85908e-06	13	12	8	annual	12	3	6.81991e-07	13	7	8	annual	12	4	1.28064e-07	13	9	6	annual	12	6	0.0104171	14	12
OG0003184	Lthed_scf0070.1_g068350.1	Qgl_scf0080.1_g059110.1	AT1G34130.1	AT1G34130.1	0.0540093	15	13	8	arrhythmic	14	10	0.0978059	13	13	10	arrhythmic	12	10	0.0256359	13	9	8	arrhythmic	12	1	7.70941e-05	13	10	5	annual	12	1	0.00447149	13	4	5	annual	12	1	0.288408	3	2	1	arrhythmic	3	11	0.000104864	13	9
OG0003189	Lthed_scf0070.1_g048890.1	Qgl_scf0080.1_g040910.1	AT1G68550.2		0.0327802	14	10	6	arrhythmic	13	7	0.00399789	14	11	9	annual	13	8	0.214662	14	11	9	arrhythmic	13	2	0.982254	8	7	1	arrhythmic	7	11	0.303403	11	3	6	arrhythmic	10	12	0.0448348	7	6	4	arrhythmic	6	3	0.00921465	13	10
OG0003195	Lthed_scf0030.1_g146620.1	Qgl_scf0010.1_g016270.1	AT5G13700.1	AT5G13700.1	0.00227139	13	10	7	annual	12	7	2.87781e-07	14	11	7	annual	13	8	2.96037e-07	14	2	9	annual	13	6	5.69342e-07	13	4	6	annual	12	8	0.000161449	13	8	7	annual	12	5	0.000211106	13	11	4	annual	12	8	0.0504548	14	12
OG0003196	Lthed_scf0030.1_g145910.1	Qgl_scf0010.1_g017030.1	AT5G13730.1	AT5G13730.1	0.79433	7	5	4	arrhythmic	6	2	0.585654	23	10	5	arrhythmic	21	7	0.861647	5	5	3	arrhythmic	5	9	0.000316563	12	6	4	annual	11	10	0.241616	13	1	6	arrhythmic	12	10	3.44275e-08	13	5	5	annual	12	2	0.186264	12	10
OG0003200	Lthed_scf0020.1_g183550.1	Qgl_scf0030.1_g000270.1	AT3G07525.2	AT3G07525.2	0.0351644	13	11	3	arrhythmic	12	8	0.26482	11	6	10	arrhythmic	10	3	0.0957754	11	4	8	arrhythmic	10	8	5.48854e-06	13	2	9	annual	12	6	0.42385	13	5	7	arrhythmic	12	2	0.0114912	19	1	4	arrhythmic	17	10	0.888811	7	4
OG0003201	Lthed_scf0110.1_g066110.1	Qgl_scf0110.1_g027760.1	AT5G01320.1	AT5G01320.1	3.41433e-06	14	2	5	annual	13	11	0.0340452	14	13	8	arrhythmic	13	10	3.95118e-05	13	3	7	annual	12	7	0.0109724	13	3	9	arrhythmic	12	7	6.96597e-05	12	3	5	annual	11	12	0.0241451	13	13	11	arrhythmic	12	10	0.00052858	13	4
OG0003203	Lthed_scf0030.1_g159330.1	Qgl_scf0010.1_g001980.1	AT1G05577.1	AT1G05577.1	1	7	1	3	arrhythmic	6	10	0.00687808	12	12	1	annual	11	9	1	13	11	7	arrhythmic	12	2	1	2	1	1	arrhythmic	2	5	0.095272	14	3	7	arrhythmic	13	12	0.00339245	15	8	10	annual	14	5	0.0513645	14	4
OG0003211	Lthed_scf0110.1_g098000.1	Qgl_scf0110.1_g001160.1	AT2G37570.1	AT2G37570.1	0.986628	23	21	10	arrhythmic	21	5	0.00621749	13	5	9	annual	12	2	0.335757	11	3	6	arrhythmic	10	7	0.016314	13	9	11	arrhythmic	12	12	0.024292	6	3	5	arrhythmic	6	12	5.91831e-05	13	4	6	annual	12	1	0.117301	7	3
OG0003214	Lthed_scf0110.1_g089680.1	Qgl_scf0110.1_g009510.1	AT5G03370.1	AT5G03370.1	1.73238e-07	13	12	4	annual	12	9	0.000163244	13	10	7	annual	12	7	0.0134709	14	3	9	arrhythmic	13	7	0.0118443	13	3	6	arrhythmic	12	7	0.0171164	12	11	4	arrhythmic	11	8	0.348368	9	3	6	arrhythmic	8	12	0.00433142	14	3
OG0003220	Lthed_scf0030.1_g050020.1	Qgl_scf0010.1_g141380.1	AT1G50500.4	AT1G50500.4	0.0880964	7	2	3	arrhythmic	6	11	6.11303e-06	13	3	9	annual	12	12	0.984161	23	17	17	arrhythmic	21	8	0.026114	13	4	6	arrhythmic	12	8	0.00144666	12	3	7	annual	11	12	1.55931e-09	13	3	8	annual	12	12	0.0231604	13	10
OG0003230	Lthed_scf0020.1_g156810.1	Qgl_scf0030.1_g025030.1	AT4G21215.2	AT4G21215.2	0.417188	7	4	4	arrhythmic	6	1	0.151158	16	10	4	arrhythmic	15	7	0.0174446	7	2	4	arrhythmic	6	6	0.483541	15	15	14	arrhythmic	14	6	0.00180122	12	5	3	annual	11	2	0.016718	13	3	5	arrhythmic	12	12	0.0146074	13	11
OG0003233	Lthed_scf0020.1_g097040.1	Qgl_scf0030.1_g084000.1	AT4G18480.1	AT4G18480.1	0.00253924	14	11	5	annual	13	8	0.00191326	12	1	4	annual	11	10	0.000833059	13	5	6	annual	12	9	0.0515452	11	7	4	arrhythmic	10	11	0.00655273	12	7	11	annual	11	4	0.00466237	13	7	11	annual	12	4	0.986169	7	5
OG0003235	Lthed_scf0020.1_g094500.1	Qgl_scf0030.1_g088300.1	AT1G28520.5	AT1G28520.5	0.040759	12	4	6	arrhythmic	11	1	5.85772e-11	13	4	8	annual	12	1	6.56139e-07	13	11	5	annual	12	2	1.22555e-05	12	9	8	annual	11	12	0.013074	12	3	10	arrhythmic	11	12	2.27815e-07	13	4	7	annual	12	1	3.00654e-08	13	10
OG0003236	Lthed_scf0020.1_g090950.1	Qgl_scf0030.1_g091330.1	AT1G28340.1	AT1G28340.1	0.00097659	21	16	16	arrhythmic	19	12	0.026563	23	16	16	arrhythmic	21	12	0.0864914	13	9	8	arrhythmic	12	1	0.149881	14	8	13	arrhythmic	13	12	0.0048831	13	2	4	annual	12	11	0.00309812	7	7	3	half-annual	6	4	0.0911208	14	12
OG0003237	Lthed_scf0110.1_g024030.1	Qgl_scf0110.1_g061730.1	AT2G40890.1	AT2G40890.1	0.0276638	14	8	8	arrhythmic	13	5	0.224709	6	6	3	arrhythmic	6	3	0.10616	14	13	10	arrhythmic	13	4	0.429692	13	13	8	arrhythmic	12	4	0.120303	12	9	9	arrhythmic	11	6	0.000340568	13	13	5	annual	12	10	0.0221533	14	4
OG0003241	Lthed_scf0110.1_g048390.1	Qgl_scf0110.1_g044120.1	AT3G58030.4	AT3G58030.4	0.000119383	13	3	9	annual	12	12	2.18762e-10	13	3	8	annual	12	12	0.0116348	13	12	2	arrhythmic	12	3	0.0396891	10	9	7	arrhythmic	9	12	0.00107087	12	4	3	annual	11	1	1.22788e-08	13	4	7	annual	12	1	0.00102139	13	11
OG0003245	Lthed_scf0110.1_g073700.1	Qgl_scf0110.1_g021480.1	AT2G35980.1	AT2G35980.1	0.113511	15	7	1	arrhythmic	14	4	0.0534567	22	20	3	arrhythmic	20	4	0.00947669	22	2	13	arrhythmic	20	6	1.34463e-05	12	9	10	annual	11	12	0.99221	9	7	5	arrhythmic	8	4	0.021772	14	12	5	arrhythmic	13	9	0.121177	10	5
OG0003246	Lthed_scf0110.1_g080000.1	Qgl_scf0110.1_g016700.1	AT5G03650.1	AT5G03650.1	2.55045e-07	13	7	2	annual	12	4	1.77134e-06	13	7	4	annual	12	4	0.98071	6	6	2	arrhythmic	6	10	0.0528162	23	20	18	arrhythmic	21	11	6.33356e-08	12	3	7	annual	11	12	3.02017e-11	14	5	4	annual	13	2	0.00173031	13	10
OG0003247	Lthed_scf0110.1_g082190.1	Qgl_scf0110.1_g014860.1	AT2G36630.1	AT2G36630.1	0.0645914	13	4	5	arrhythmic	12	1	0.104764	13	10	4	arrhythmic	12	7	0.169024	7	2	3	arrhythmic	6	6	0.0779482	12	10	3	arrhythmic	11	1	0.009752	12	9	8	annual	11	6	0.00893127	13	9	7	annual	12	6	1.98392e-06	14	9
OG0003249	Lthed_scf0110.1_g084260.1	Qgl_scf0110.1_g013970.1	AT2G36720.2	AT2G36720.2	0.402307	18	5	14	arrhythmic	17	2	0.0394524	7	3	3	arrhythmic	6	12	0.544179	6	5	2	arrhythmic	6	9	0.0263691	12	10	4	arrhythmic	11	1	0.0381456	10	4	4	arrhythmic	9	1	0.012793	13	11	9	arrhythmic	12	8	0.00016761	13	11
OG0003252	Lthed_scf0110.1_g085160.1	Qgl_scf0110.1_g013310.1	AT3G53150.1	AT3G53150.1	0.00137456	14	12	5	annual	13	9	7.11837e-08	14	7	9	annual	13	4	0.0125723	13	5	3	arrhythmic	12	9	1.34807e-07	13	3	5	annual	12	7	0.000564903	12	9	7	annual	11	6	5.8556e-07	13	12	4	annual	12	9	9.09763e-08	13	1
OG0003259	Lthed_scf0110.1_g001670.1	Qgl_scf0110.1_g082640.1	AT2G41760.1	AT2G41760.1	2.37906e-07	13	10	7	annual	12	7	0.000245856	13	3	1	annual	12	12	0.703548	12	3	3	arrhythmic	11	7	0.00453616	11	4	7	annual	10	8	2.98744e-05	13	10	7	annual	12	7	0.000243242	13	13	4	annual	12	10	0.00105331	14	14
OG0003260	Lthed_scf0020.1_g160300.1	Qgl_scf0030.1_g021200.1	AT4G05180.2	AT4G05180.2	0.00137422	14	10	6	annual	13	7	0.000374194	14	9	8	annual	13	6	4.11897e-06	13	4	5	annual	12	8	0.000349182	12	5	5	annual	11	9	1.14808e-09	12	8	8	annual	11	5	0.0019384	13	10	7	annual	12	7	0.00800093	12	3
OG0003265	Lthed_scf0020.1_g105290.1	Qgl_scf0030.1_g077980.1	AT4G18740.4	AT4G18740.4	0.352657	7	6	3	arrhythmic	6	3	0.0258105	14	11	8	arrhythmic	13	8	0.117004	22	12	12	arrhythmic	20	3	0.551878	12	2	7	arrhythmic	11	6	0.485172	11	1	2	arrhythmic	10	10	0.17048	17	2	6	arrhythmic	16	11	0.397461	6	1
OG0003267	Lthed_scf0020.1_g160400.1	Qgl_scf0030.1_g021020.1	AT4G00390.1	AT1G61730.1	0.00119872	12	3	9	annual	11	12	0.984568	12	5	6	arrhythmic	11	2	0.085981	12	12	2	arrhythmic	11	3	0.0255526	12	10	7	arrhythmic	11	1	0.00388197	12	3	9	annual	11	12	0.109302	21	5	14	arrhythmic	19	2	0.0778193	12	12
OG0003269	Lthed_scf0020.1_g155570.1	Qgl_scf0030.1_g026280.1	AT1G11580.2	AT1G11580.1	0.244671	8	2	6	arrhythmic	7	11	0.00255083	16	14	10	annual	15	10	0.0054315	23	21	9	arrhythmic	21	12	0.00281169	12	8	4	annual	11	12	0.60312	14	12	5	arrhythmic	13	9	0.473072	14	12	13	arrhythmic	13	9	0.449042	15	15
OG0003271	Lthed_scf0020.1_g146510.1	Qgl_scf0030.1_g032900.1	AT4G22260.1	AT4G22260.1	1.45486e-10	13	4	5	annual	12	1	8.19053e-08	13	3	8	annual	12	12	0.00825524	14	10	3	annual	13	1	2.39213e-05	14	9	5	annual	13	12	2.84845e-06	12	5	3	annual	11	2	5.36028e-08	13	4	6	annual	12	1	0.000852383	12	10
OG0003287	Lthed_scf0070.1_g070450.1	Qgl_scf0080.1_g060480.1	AT2G26560.1	AT2G26560.1	0.999999	2	2	1	arrhythmic	2	11	1	4	4	3	arrhythmic	4	1	1	2	1	1	arrhythmic	2	5	0.00313446	12	11	2	annual	11	2	0.0886108	12	9	9	arrhythmic	11	6	0.000122681	13	9	11	annual	12	6	1	16	16
OG0003289	Lthed_scf0070.1_g002400.1	Qgl_scf0080.1_g001050.1	AT5G50930.1	AT5G50930.1	0.195481	22	5	12	arrhythmic	20	2	0.125449	13	8	8	arrhythmic	12	5	0.000341591	13	12	4	annual	12	3	0.280246	13	8	8	arrhythmic	12	12	0.000136998	13	4	6	annual	12	1	5.84447e-05	13	5	7	annual	12	2	0.000224778	14	12
OG0003290	Lthed_scf0070.1_g003080.1	Qgl_scf0080.1_g002590.1	AT3G48820.1	AT3G48820.1	0.0031538	15	2	8	annual	14	11	0.000319905	15	2	8	annual	14	11	0.00572971	14	9	8	annual	13	1	0.528138	5	1	2	arrhythmic	5	5	0.0136119	12	4	6	arrhythmic	11	1	1.72864e-05	13	5	4	annual	12	2	0.000922448	14	9
OG0003297	Lthed_scf0070.1_g029140.1	Qgl_scf0080.1_g023670.1	AT5G62680.1	AT5G62680.1	0.0275636	21	17	8	arrhythmic	19	1	0.145482	13	13	2	arrhythmic	12	10	0.000887245	13	1	8	annual	12	5	0.00777578	12	10	9	annual	11	1	0.000929279	12	4	8	annual	11	1	0.505119	14	13	5	arrhythmic	13	10	0.106766	13	11
OG0003299	Lthed_scf0070.1_g031060.1	Qgl_scf0080.1_g025620.1	AT5G20970.1	AT2G27140.1	0.00655783	16	10	9	annual	15	7	4.18175e-05	14	10	10	annual	13	7	3.3971e-05	14	13	13	annual	13	4	0.0100621	22	15	9	arrhythmic	20	6	3.05233e-08	13	7	11	annual	12	4	1.20009e-05	13	9	9	annual	12	6	0.432698	23	8
OG0003311	Lthed_scf0120.1_g017670.1	Qgl_scf0120.1_g013660.1	AT4G17610.2	AT4G17610.2	0.024504	13	5	4	arrhythmic	12	2	1.69539e-07	13	5	4	annual	12	2	0.960797	13	10	4	arrhythmic	12	1	0.0445505	23	21	12	arrhythmic	21	11	0.00595577	11	6	5	annual	10	3	0.00143163	15	4	5	annual	14	1	0.000353073	13	12
OG0003314	Lthed_scf0120.1_g004460.1	Qgl_scf0120.1_g003740.1	AT1G31360.1	AT1G31360.1	0.00203939	13	11	7	annual	12	8	0.664821	6	3	3	arrhythmic	6	12	0.984897	4	3	2	arrhythmic	4	7	6.09553e-05	12	5	5	annual	11	9	0.18305	7	3	4	arrhythmic	6	12	4.93104e-05	15	4	5	annual	14	1	0.264315	12	10
OG0003320	Lthed_scf0040.1_g103400.1	Qgl_scf0050.1_g038120.1			0.981604	11	9	6	arrhythmic	10	6	0.281936	23	8	9	arrhythmic	21	5	0.564707	8	1	4	arrhythmic	7	5	0.314611	6	2	2	arrhythmic	6	6	0.0229195	13	8	3	arrhythmic	12	5	0.764618	6	1	3	arrhythmic	6	10	6.59752e-05	14	12
OG0003325	Lthed_scf0040.1_g124680.1	Qgl_scf0050.1_g016120.1	AT4G26690.1	AT4G26690.1	0.248805	6	2	4	arrhythmic	6	11	0.000932565	13	7	10	annual	12	4	0.00281422	13	1	7	annual	12	5	0.0920184	6	4	3	arrhythmic	6	8	0.00604553	6	1	4	half-annual	6	10	2.02951e-09	13	8	7	annual	12	5	0.0267246	12	2
OG0003326	Lthed_scf0010.1_g092040.1	Qgl_scf0020.1_g088430.1	AT5G40380.1	AT5G40380.1	0.521754	7	7	1	arrhythmic	6	4	0.923483	4	1	1	arrhythmic	4	10	0.724181	16	3	6	arrhythmic	15	7	0.0739011	7	3	4	arrhythmic	6	7	0.649113	15	7	9	arrhythmic	14	4	0.177445	16	9	10	arrhythmic	15	6	0.252501	16	2
OG0003330	Lthed_scf0010.1_g099930.1	Qgl_scf0020.1_g094800.1	AT2G18410.1	AT2G18410.1	0.024952	13	13	2	arrhythmic	12	10	1.71676e-05	12	12	4	annual	11	9	0.0248362	13	1	9	arrhythmic	12	5	0.000214517	12	4	6	annual	11	8	0.117323	13	1	1	arrhythmic	12	10	0.000125464	13	12	3	annual	12	9	0.522438	7	5
OG0003341	Lthed_scf0040.1_g059520.1	Qgl_scf0050.1_g075280.1	AT2G19130.1	AT2G19130.1	0.000634571	15	10	10	annual	14	7	0.103786	13	9	6	arrhythmic	12	6	3.40295e-05	13	5	4	annual	12	9	0.0197397	13	4	9	arrhythmic	12	8	0.68485	6	3	3	arrhythmic	6	12	0.104388	10	4	4	arrhythmic	9	1	0.00501414	14	6
OG0003344	Lthed_scf0080.1_g105400.1	Qgl_scf0070.1_g006670.1	AT2G26460.1	AT2G26460.1	0.000158059	12	5	7	annual	11	2	0.351812	10	8	5	arrhythmic	9	5	0.00282709	12	10	7	annual	11	1	0.89513	13	9	7	arrhythmic	12	12	0.000446335	13	2	8	annual	12	11	0.460697	9	8	3	arrhythmic	8	5	8.14964e-06	13	11
OG0003348	Lthed_scf0010.1_g030220.1	Qgl_scf0020.1_g029550.1	AT3G33530.1	AT3G33530.1	4.65534e-05	13	9	9	annual	12	6	0.0745304	12	12	6	arrhythmic	11	9	0.245905	14	13	12	arrhythmic	13	4	0.135583	22	20	14	arrhythmic	20	11	6.08512e-05	12	12	5	annual	11	9	0.343965	7	7	2	arrhythmic	6	4	0.00179871	13	6
OG0003437	Lthed_scf0080.1_g017250.1	Qgl_scf0070.1_g097220.1	AT2G21290.1	AT2G21290.1	0.344645	16	12	15	arrhythmic	15	9	0.698172	11	1	5	arrhythmic	10	10	0.690478	23	2	3	arrhythmic	21	6	0.0875938	23	5	21	arrhythmic	21	9	0.235767	11	11	3	arrhythmic	10	8	0.00820307	14	10	6	annual	13	7	0.0837398	23	5
OG0003445	Lthed_scf0090.1_g026800.1	Qgl_scf0060.1_g086350.1	AT5G51300.3	AT5G51300.3	0.0434615	13	11	5	arrhythmic	12	8	3.88671e-05	13	11	6	annual	12	8	0.324505	7	6	5	arrhythmic	6	10	0.941048	12	2	7	arrhythmic	11	6	0.000378565	11	9	7	annual	10	6	0.00490792	23	23	17	arrhythmic	21	7	3.19621e-06	15	2
OG0003455	Lthed_scf0110.1_g003750.1	Qgl_scf0110.1_g080970.1	AT3G10310.2	AT3G10310.2	0.0497053	10	8	6	arrhythmic	9	5	0.377663	13	11	12	arrhythmic	12	8	0.556628	14	13	6	arrhythmic	13	4	0.0178169	14	10	9	arrhythmic	13	1	0.00789133	11	8	8	annual	10	5	5.07833e-06	13	10	8	annual	12	7	0.00107668	7	5
OG0003464	Lthed_scf0120.1_g017420.1	Qgl_scf0120.1_g013460.1	AT1G21270.1	AT1G21270.1	0.00836101	12	11	5	annual	11	8	1.51616e-07	14	11	5	annual	13	8	3.61769e-05	13	3	6	annual	12	7	8.94189e-08	14	3	6	annual	13	7	1.76803e-05	13	9	6	annual	12	6	1.67729e-09	13	11	6	annual	12	8	6.60782e-06	15	1
OG0003519	Lthed_scf0040.1_g055000.1	Qgl_scf0050.1_g078550.1	AT1G03620.12	AT1G03620.12	1	19	8	16	arrhythmic	17	5	0.0456024	13	11	6	arrhythmic	12	8	0.341095	14	14	3	arrhythmic	13	5	0.00259349	12	2	7	annual	11	6	3.72886e-07	12	12	4	annual	11	9	0.000292631	13	13	3	annual	12	10	3.00345e-05	15	4
OG0003523	Lthed_scf0060.1_g107720.1	Qgl_scf0090.1_g016270.1	AT3G02830.1	AT3G02830.1	0.101379	13	3	9	arrhythmic	12	12	0.000410192	12	8	4	annual	11	5	0.0224015	18	6	3	arrhythmic	17	10	0.000181906	12	12	4	annual	11	3	0.0935016	6	3	4	arrhythmic	6	12	2.31204e-05	14	4	6	annual	13	1	0.45718	14	8
OG0003524	Lthed_scf0010.1_g198180.1	Qgl_scf0020.1_g191800.1	AT5G26010.1	AT5G26010.1	1	20	11	9	arrhythmic	18	8	0.14715	12	12	6	arrhythmic	11	9	0.971066	23	15	17	arrhythmic	21	6	1	14	1	7	arrhythmic	13	5	2.90732e-05	13	8	9	annual	12	5	3.23313e-07	12	9	7	annual	11	6	0.00708167	7	5
OG0003525	Lthed_scf0080.1_g066500.1	Qgl_scf0070.1_g048800.1	AT2G22570.1	AT2G22570.1	0.294814	12	3	5	arrhythmic	11	12	0.0363102	14	9	10	arrhythmic	13	6	0.12292	7	5	3	arrhythmic	6	9	0.014404	13	3	6	arrhythmic	12	7	0.0500273	12	10	10	arrhythmic	11	7	6.74637e-05	15	9	8	annual	14	6	0.0555426	13	3
OG0003526	Lthed_scf0010.1_g154850.1	Qgl_scf0020.1_g162810.1	AT1G43790.1	AT1G43790.1	1	13	9	8	arrhythmic	12	6	7.95765e-05	12	12	5	annual	11	9	0.0119944	14	13	11	arrhythmic	13	4	0.00969969	13	2	7	annual	12	6	1.66384e-07	13	9	8	annual	12	6	0.00751789	6	1	3	half-annual	6	10	0.00959946	13	1
OG0003528	Lthed_scf0120.1_g072910.1	Qgl_scf0120.1_g064230.1	AT1G78020.1	AT1G78020.1	0.963713	4	3	1	arrhythmic	4	12	0.882705	4	2	2	arrhythmic	4	11	0.985217	7	5	1	arrhythmic	6	9	0.0130364	16	15	15	arrhythmic	15	6	0.440319	12	1	6	arrhythmic	11	10	0.296694	6	1	3	arrhythmic	6	10	0.0632643	14	11
OG0003529	Lthed_scf0090.1_g011180.1	Qgl_scf0060.1_g106640.1	AT3G49590.2	AT3G49590.2	3.62316e-06	14	3	9	annual	13	12	9.38329e-10	14	3	9	annual	13	12	3.26008e-06	13	11	4	annual	12	2	1.39805e-06	13	9	8	annual	12	12	0.000758609	13	3	8	annual	12	12	2.43947e-09	13	4	6	annual	12	1	0.0372149	13	11
OG0003530	Lthed_scf0040.1_g051960.1	Qgl_scf0050.1_g086840.1	AT4G21470.1	AT4G21470.1	0.386141	13	13	4	arrhythmic	12	10	0.746403	4	2	2	arrhythmic	4	11	0.00850572	14	14	13	annual	13	5	0.000335542	12	5	6	annual	11	9	0.0168766	13	11	6	arrhythmic	12	8	0.270274	15	3	6	arrhythmic	14	12	0.0311026	12	2
OG0003538	Lthed_scf0060.1_g011390.1	Qgl_scf0090.1_g113510.1	AT1G71110.1	AT1G71110.1	0.091847	13	4	6	arrhythmic	12	1	0.37057	15	2	6	arrhythmic	14	11	0.0116073	14	13	4	arrhythmic	13	4	0.274425	23	14	9	arrhythmic	21	5	0.00291735	6	1	4	half-annual	6	10	0.162551	7	6	4	arrhythmic	6	3	5.89007e-05	12	3
OG0003543	Lthed_scf0090.1_g064710.1	Qgl_scf0060.1_g046850.1	AT4G08320.1	AT4G08320.1	0.0662194	17	1	6	arrhythmic	16	10	0.425913	14	7	2	arrhythmic	13	4	0.0134124	14	8	9	arrhythmic	13	12	0.0210157	11	8	6	arrhythmic	10	12	3.99939e-05	12	5	7	annual	11	2	0.0808031	12	8	3	arrhythmic	11	5	8.88059e-05	15	9
OG0003544	Lthed_scf0090.1_g038950.1	Qgl_scf0060.1_g072410.1	AT5G16680.2	AT5G16680.2	0.74845	23	20	11	arrhythmic	21	4	0.0120971	13	9	5	arrhythmic	12	6	0.0949669	13	5	9	arrhythmic	12	9	0.00978952	21	1	10	arrhythmic	19	5	0.000448089	12	4	3	annual	11	1	5.07734e-08	13	4	6	annual	12	1	0.000131841	13	11
OG0003546	Lthed_scf0090.1_g011770.1	Qgl_scf0060.1_g105890.1	AT1G44800.1	AT1G44800.1	1	14	8	10	arrhythmic	13	5	0.9368	11	2	3	arrhythmic	10	11	0.00850378	14	8	8	annual	13	12	0.000127987	11	5	6	annual	10	9	0.40834	12	8	7	arrhythmic	11	5	0.0164125	13	12	4	arrhythmic	12	9	0.435559	16	7
OG0003548	Lthed_scf0090.1_g013220.1	Qgl_scf0060.1_g104480.1	AT5G24500.1	AT5G24500.1	0.0612224	13	8	5	arrhythmic	12	5	0.00238929	12	8	8	annual	11	5	0.0439039	13	7	11	arrhythmic	12	11	0.681163	12	11	1	arrhythmic	11	2	0.962899	9	7	8	arrhythmic	8	4	4.42941e-08	14	11	6	annual	13	8	0.166908	13	8
OG0003551	Lthed_scf0050.1_g073490.1	Qgl_scf0040.1_g081030.1	AT2G01600.1	AT2G01600.1	4.04427e-05	21	16	13	arrhythmic	19	12	0.0330354	13	3	11	arrhythmic	12	12	5.84418e-06	14	3	5	annual	13	7	0.00576205	6	4	3	half-annual	6	8	0.172559	12	3	11	arrhythmic	11	12	0.0882266	21	16	11	arrhythmic	19	12	0.0713158	12	5
OG0003552	Lthed_scf0050.1_g072260.1	Qgl_scf0040.1_g079300.1	AT1G70670.1	AT1G70670.1	6.94394e-05	13	4	7	annual	12	1	1.92559e-05	13	3	10	annual	12	12	1.99346e-05	13	9	9	annual	12	1	6.56244e-05	13	9	7	annual	12	12	0.000128935	13	2	9	annual	12	11	0.0479732	18	14	12	arrhythmic	17	10	3.89928e-06	14	9
OG0003553	Lthed_scf0060.1_g005320.1	Qgl_scf0090.1_g096900.1	AT2G23940.3	AT2G23940.3	0.00413699	13	10	9	annual	12	7	0.180947	7	3	3	arrhythmic	6	12	0.0242179	11	6	2	arrhythmic	10	10	0.869801	6	5	3	arrhythmic	6	9	0.452046	12	7	11	arrhythmic	11	4	0.0468868	12	10	5	arrhythmic	11	7	0.489625	23	1
OG0003555	Lthed_scf0050.1_g067330.1	Qgl_scf0040.1_g072790.1	AT1G14740.1	AT1G14740.1	0.0719953	12	6	7	arrhythmic	11	3	0.463257	13	12	2	arrhythmic	12	9	0.992149	7	5	2	arrhythmic	6	9	0.0557638	7	2	4	arrhythmic	6	6	0.0815162	14	7	10	arrhythmic	13	4	1.31918e-07	14	10	7	annual	13	7	0.862928	14	13
OG0003556	Lthed_scf0050.1_g066340.1	Qgl_scf0040.1_g072080.1			1	14	8	11	arrhythmic	13	5	0.00153956	13	12	3	annual	12	9	0.441101	5	2	3	arrhythmic	5	6	1	11	4	7	arrhythmic	10	8	0.000186268	12	7	10	annual	11	4	1.18367e-10	13	10	6	annual	12	7	0.0193949	7	7
OG0003559	Lthed_scf0050.1_g050220.1	Qgl_scf0040.1_g056670.1	AT3G19910.1	AT3G19910.1	3.9831e-07	12	4	8	annual	11	1	2.12107e-09	13	4	7	annual	12	1	1.57774e-05	14	10	6	annual	13	1	0.00700714	12	10	8	annual	11	1	0.0080877	13	2	8	annual	12	11	0.545793	7	1	3	arrhythmic	6	10	2.57782e-07	13	10
OG0003562	Lthed_scf0050.1_g067150.1	Qgl_scf0040.1_g072680.1	AT1G14720.1	AT1G14720.1	0.0144877	7	3	3	arrhythmic	6	12	0.934754	4	1	1	arrhythmic	4	10	0.000788615	14	12	8	annual	13	3	0.0540577	11	1	6	arrhythmic	10	5	0.953913	12	7	11	arrhythmic	11	4	0.118699	13	9	9	arrhythmic	12	6	0.00562856	6	2
OG0003565	Lthed_scf0050.1_g024570.1	Qgl_scf0040.1_g031550.1	AT1G13130.1	AT1G13130.1	0.00128743	12	10	4	annual	11	7	0.00013018	13	11	4	annual	12	8	6.48704e-05	14	13	11	annual	13	4	5.54214e-06	14	1	8	annual	13	5	0.00201871	14	14	11	annual	13	10	0.158794	13	1	9	arrhythmic	12	10	0.144219	14	8
OG0003567	Lthed_scf0050.1_g023080.1	Qgl_scf0040.1_g029230.1	AT1G67850.7	AT1G67850.7	0.146927	7	3	3	arrhythmic	6	12	0.235143	14	2	13	arrhythmic	13	11	0.0844008	13	1	7	arrhythmic	12	5	0.45386	6	4	2	arrhythmic	6	8	0.0109179	12	4	2	arrhythmic	11	1	0.025919	14	2	8	arrhythmic	13	11	0.484191	15	9
OG0003568	Lthed_scf0050.1_g019650.1	Qgl_scf0040.1_g026770.1	AT1G70520.1	AT1G70520.1	1.19622e-05	13	9	6	annual	12	6	0.0114839	14	6	9	arrhythmic	13	3	0.00132919	13	1	6	annual	12	5	0.732829	13	4	3	arrhythmic	12	8	0.528595	6	4	4	arrhythmic	6	1	0.00257751	16	6	5	annual	15	3	0.22494	6	4
OG0003574	Lthed_scf0050.1_g016150.1	Qgl_scf0040.1_g018000.1	AT1G59640.1	AT1G59640.1	0.198921	13	9	7	arrhythmic	12	6	0.199084	13	12	3	arrhythmic	12	9	0.259966	14	13	5	arrhythmic	13	4	0.000784042	11	4	3	annual	10	8	1.16916e-06	12	9	7	annual	11	6	8.36039e-09	15	10	7	annual	14	7	0.354389	7	7
OG0003576	Lthed_scf0050.1_g013310.1	Qgl_scf0040.1_g014940.1	AT1G69780.1	AT1G69780.1	0.0017139	14	8	9	annual	13	5	2.6257e-07	13	11	6	annual	12	8	0.000172412	14	13	11	annual	13	4	0.000999233	12	3	7	annual	11	7	0.000108923	12	8	9	annual	11	5	0.000954345	13	1	2	annual	12	10	0.000842002	14	13
OG0003578	Lthed_scf0050.1_g009640.1	Qgl_scf0040.1_g011920.1	AT1G69530.2	AT1G69530.2	0.512543	12	8	3	arrhythmic	11	5	0.0356176	14	2	7	arrhythmic	13	11	0.325101	7	7	3	arrhythmic	6	11	0.309991	16	14	2	arrhythmic	15	5	0.00122401	13	7	10	annual	12	4	0.00239044	13	6	11	annual	12	3	0.00604238	13	1
OG0003582	Lthed_scf0050.1_g001000.1	Qgl_scf0040.1_g001330.1	AT2G03780.1	AT2G03780.1	0.939941	7	1	1	arrhythmic	6	10	1.40618e-07	13	13	4	annual	12	10	0.995012	12	1	5	arrhythmic	11	5	0.00121143	12	7	3	annual	11	11	0.00198863	6	2	2	half-annual	6	11	0.000182665	12	8	9	annual	11	5	0.325101	7	7
OG0003583	Lthed_scf0050.1_g000850.1	Qgl_scf0040.1_g001230.1	AT1G26300.1	AT1G26300.1	0.629857	6	3	4	arrhythmic	6	12	0.000433555	14	2	7	annual	13	11	6.8338e-06	14	13	4	annual	13	4	0.000504895	12	3	8	annual	11	7	0.00236672	6	2	3	half-annual	6	11	1.33405e-07	13	1	3	annual	12	10	0.100307	7	6
OG0003587	Lthed_scf0050.1_g031490.1	Qgl_scf0040.1_g039280.1	AT1G27390.1	AT1G27390.1	4.83859e-06	12	4	7	annual	11	1	1.82072e-06	13	5	6	annual	12	2	5.57667e-09	13	9	8	annual	12	1	0.000104973	12	7	11	annual	11	11	0.00137544	12	3	9	annual	11	12	0.000342474	12	4	9	annual	11	1	2.13831e-06	14	8
OG0003588	Lthed_scf0050.1_g036610.1	Qgl_scf0040.1_g044260.1	AT5G43280.1	AT5G43280.1	8.14329e-06	12	11	5	annual	11	8	0.00426434	12	12	4	annual	11	9	1.99479e-05	13	4	4	annual	12	8	0.000238246	14	3	5	annual	13	7	0.00642501	23	18	8	arrhythmic	21	2	0.0676166	23	13	14	arrhythmic	21	10	0.0692292	23	18
OG0003589	Lthed_scf0040.1_g023810.1	Qgl_scf0050.1_g113160.1	AT1G29880.1	AT1G29880.1	3.68127e-07	13	4	4	annual	12	1	4.13459e-05	13	3	8	annual	12	12	0.0983283	14	5	8	arrhythmic	13	9	0.000130293	16	3	9	annual	15	7	6.56809e-07	13	4	5	annual	12	1	1.28517e-07	13	4	5	annual	12	1	0.569384	12	10
OG0003590	Lthed_scf0050.1_g042210.1	Qgl_scf0040.1_g049280.1	AT1G28130.1	AT1G28130.1	1	19	8	10	arrhythmic	17	5	0.999995	6	6	4	arrhythmic	6	3	1	2	1	1	arrhythmic	2	5	1	2	2	1	arrhythmic	2	6	0.588802	12	8	10	arrhythmic	11	5	0.131215	16	9	11	arrhythmic	15	6	2.14385e-06	13	1
OG0003593	Lthed_scf0050.1_g046290.1	Qgl_scf0040.1_g052190.1	AT5G47870.1	AT5G47870.1	0.0459129	14	2	9	arrhythmic	13	11	6.52302e-07	13	3	8	annual	12	12	0.0311158	14	11	8	arrhythmic	13	2	4.91845e-05	22	8	16	arrhythmic	20	12	0.116652	16	2	8	arrhythmic	15	11	0.00783257	23	20	2	arrhythmic	21	4	0.952739	11	2
OG0003595	Lthed_scf0080.1_g001710.1	Qgl_scf0070.1_g116310.1	AT4G35310.2	AT2G17290.2	0.00111987	19	16	10	arrhythmic	17	12	0.314542	13	12	8	arrhythmic	12	9	0.244426	12	7	6	arrhythmic	11	11	0.00115643	12	11	3	annual	11	2	0.059141	6	3	3	arrhythmic	6	12	0.00273626	14	9	10	annual	13	6	0.101759	18	17
OG0003596	Lthed_scf0040.1_g030230.1	Qgl_scf0050.1_g107630.1	AT2G45480.1	AT2G45480.3	0.000325144	13	3	9	annual	12	12	0.490878	6	4	3	arrhythmic	6	1	0.997469	12	2	4	arrhythmic	11	6	0.00309628	13	4	6	annual	12	8	1.18723e-09	13	4	5	annual	12	1	2.36844e-05	13	4	8	annual	12	1	8.2502e-05	14	11
OG0003597	Lthed_scf0080.1_g006840.1	Qgl_scf0070.1_g109700.1	AT4G35140.2	AT4G35140.2	1.74776e-06	17	17	8	annual	16	1	3.33356e-05	14	2	4	annual	13	11	0.00101216	13	12	4	annual	12	3	1.58033e-07	13	12	4	annual	12	3	0.0139339	12	4	3	arrhythmic	11	1	1.36406e-05	13	2	8	annual	12	11	0.0170214	13	9
OG0003598	Lthed_scf0080.1_g007960.1	Qgl_scf0070.1_g107750.1	AT4G38510.5	AT4G38510.5	0.029735	13	12	10	arrhythmic	12	9	1.18466e-07	13	4	7	annual	12	1	1.15198e-07	13	11	6	annual	12	2	0.139567	11	11	6	arrhythmic	10	2	0.347421	6	4	3	arrhythmic	6	1	5.39865e-07	13	4	5	annual	12	1	1.19327e-06	13	9
OG0003601	Lthed_scf0080.1_g011840.1	Qgl_scf0070.1_g103970.1	AT4G34950.1	AT4G34950.1	0.953229	16	10	15	arrhythmic	15	7	0.0184805	12	4	8	arrhythmic	11	1	0.271693	20	4	9	arrhythmic	18	8	0.000251846	13	3	10	annual	12	7	0.953463	11	4	4	arrhythmic	10	1	3.419e-07	14	2	8	annual	13	11	0.00014554	14	10
OG0003603	Lthed_scf0080.1_g014950.1	Qgl_scf0070.1_g099530.1	AT4G38770.1	AT2G21140.1	1	11	9	4	arrhythmic	10	6	1	12	12	4	arrhythmic	11	9	1	14	13	4	arrhythmic	13	4	1	7	6	4	arrhythmic	6	10	6.26126e-05	6	1	4	half-annual	6	10	2.1951e-09	13	8	10	annual	12	5	0.00814395	12	8
OG0003604	Lthed_scf0080.1_g017060.1	Qgl_scf0070.1_g097400.1	AT2G21240.2	AT2G21240.2	9.85209e-05	14	3	8	annual	13	12	0.000664511	14	3	8	annual	13	12	0.00989864	12	11	3	annual	11	2	5.64765e-07	13	9	7	annual	12	12	0.000185077	13	4	3	annual	12	1	0.0467384	17	16	11	arrhythmic	16	12	0.319026	6	6
OG0003605	Lthed_scf0080.1_g019090.1	Qgl_scf0070.1_g094670.1	AT4G39100.1	AT4G39100.1	0.000325524	12	11	4	annual	11	8	4.13796e-06	15	10	7	annual	14	7	3.88135e-07	12	5	4	annual	11	9	4.58102e-05	14	3	5	annual	13	7	0.0108282	12	10	6	arrhythmic	11	7	0.000192161	12	11	5	annual	11	8	0.000510179	13	5
OG0003606	Lthed_scf0080.1_g019900.1	Qgl_scf0070.1_g092810.1	AT4G39150.3	AT4G39150.3	0.194438	7	2	4	arrhythmic	6	11	1.8877e-06	13	12	7	annual	12	9	2.69484e-05	14	13	12	annual	13	4	0.56708	16	13	13	arrhythmic	15	4	1.42864e-07	13	8	9	annual	12	5	1.9127e-08	13	10	7	annual	12	7	8.10973e-05	13	1
OG0003607	Lthed_scf0080.1_g019950.1	Qgl_scf0070.1_g092770.1	AT2G21520.1	AT2G21520.1	0.903333	6	4	2	arrhythmic	6	1	0.00850618	18	12	17	arrhythmic	17	9	0.186569	14	13	3	arrhythmic	13	4	1.76517e-05	12	10	7	annual	11	1	0.0167672	6	2	3	arrhythmic	6	11	0.516724	19	2	3	arrhythmic	17	11	9.61954e-07	13	9
OG0003608	Lthed_scf0080.1_g021210.1	Qgl_scf0070.1_g091410.1	AT1G19440.1	AT1G19440.1	6.84255e-06	14	8	8	annual	13	5	2.34323e-06	12	12	4	annual	11	9	3.37914e-07	13	1	9	annual	12	5	1.69204e-09	12	4	6	annual	11	8	4.71475e-05	13	9	6	annual	12	6	2.36056e-07	13	11	6	annual	12	8	3.39197e-07	14	3
OG0003610	Lthed_scf0080.1_g024610.1	Qgl_scf0070.1_g086770.1	AT2G16070.2	AT2G16070.2	0.239196	12	10	6	arrhythmic	11	7	0.988358	12	9	7	arrhythmic	11	6	0.00013676	12	11	4	annual	11	2	0.997184	8	4	4	arrhythmic	7	8	2.4685e-05	12	6	3	annual	11	3	0.0236865	12	6	7	arrhythmic	11	3	0.000110862	16	10
OG0003612	Lthed_scf0010.1_g009060.1	Qgl_scf0020.1_g010100.1	AT1G71900.1	AT1G71900.1	0.474475	23	9	9	arrhythmic	21	6	0.018687	10	2	8	arrhythmic	9	11	0.347334	6	2	3	arrhythmic	6	6	0.974187	7	7	3	arrhythmic	6	11	0.00176622	6	2	3	half-annual	6	11	0.431572	19	1	18	arrhythmic	17	10	0.723676	7	6
OG0003616	Lthed_scf0010.1_g011750.1	Qgl_scf0020.1_g012350.1	AT1G68140.4	AT1G68140.4	0.70489	23	16	21	arrhythmic	21	12	0.0729067	23	16	10	arrhythmic	21	12	0.00550425	12	12	5	annual	11	3	0.0258354	10	3	4	arrhythmic	9	7	0.957392	7	7	4	arrhythmic	6	4	0.000741092	12	8	10	annual	11	5	0.916139	7	6
OG0003617	Lthed_scf0080.1_g075770.1	Qgl_scf0070.1_g036480.1	AT1G36990.1	AT1G36990.1	0.118209	13	4	5	arrhythmic	12	1	2.69429e-05	12	4	8	annual	11	1	0.0257369	16	6	7	arrhythmic	15	10	0.0225877	14	12	2	arrhythmic	13	3	0.0627166	6	4	3	arrhythmic	6	1	1.60194e-10	13	4	6	annual	12	1	0.00621077	14	10
OG0003619	Lthed_scf0080.1_g075000.1	Qgl_scf0070.1_g037900.1	AT5G16620.1	AT5G16620.1	0.00246046	13	11	6	annual	12	8	3.51163e-06	13	10	7	annual	12	7	9.13052e-06	14	3	9	annual	13	7	2.10928e-05	12	5	5	annual	11	9	0.00473011	12	11	3	annual	11	8	2.00194e-06	13	11	6	annual	12	8	0.0460679	17	5
OG0003622	Lthed_scf0080.1_g068910.1	Qgl_scf0070.1_g046210.1	AT5G64330.1	AT5G64330.1	0.317659	7	4	2	arrhythmic	6	1	0.000309559	17	16	7	annual	16	12	0.173582	18	14	13	arrhythmic	17	5	0.377338	11	6	1	arrhythmic	10	10	0.89381	10	5	4	arrhythmic	9	2	1.51758e-06	14	2	9	annual	13	11	0.000566673	14	3
OG0003623	Lthed_scf0080.1_g067950.1	Qgl_scf0070.1_g046770.1	AT4G33580.3	AT4G33580.3	2.47953e-05	14	8	10	annual	13	5	0.304792	13	12	4	arrhythmic	12	9	2.11962e-05	14	13	10	annual	13	4	0.12666	12	4	8	arrhythmic	11	8	0.0432755	6	2	4	arrhythmic	6	11	0.00704351	13	12	6	annual	12	9	0.420903	9	9
OG0003624	Lthed_scf0080.1_g066080.1	Qgl_scf0070.1_g049150.1	AT1G51600.2	AT1G51600.2	9.83501e-05	12	6	5	annual	11	3	2.59697e-07	13	5	7	annual	12	2	0.00157788	13	10	8	annual	12	1	0.734142	17	2	3	arrhythmic	16	6	0.00760785	11	6	2	annual	10	3	2.75772e-08	13	5	7	annual	12	2	0.00110049	19	8
OG0003628	Lthed_scf0080.1_g049220.1	Qgl_scf0070.1_g063050.1	AT3G19640.1	AT3G19640.1	1.48563e-05	13	3	9	annual	12	12	7.53857e-13	13	4	8	annual	12	1	0.00117231	12	12	3	annual	11	3	1.80153e-06	13	10	6	annual	12	1	0.000103884	12	4	6	annual	11	1	1.26907e-15	13	3	8	annual	12	12	0.000224104	14	10
OG0003629	Lthed_scf0080.1_g045510.1	Qgl_scf0070.1_g066150.1	AT2G14835.2	AT2G14835.2	0.0119336	13	4	8	arrhythmic	12	1	4.84342e-06	13	4	6	annual	12	1	0.0315119	14	14	2	arrhythmic	13	5	0.759855	18	14	7	arrhythmic	17	5	0.236523	12	8	1	arrhythmic	11	5	0.544506	4	4	2	arrhythmic	4	1	0.915261	7	5
OG0003631	Lthed_scf0080.1_g034850.1	Qgl_scf0070.1_g075110.1	AT4G34100.2	AT4G34100.2	0.0851528	10	3	5	arrhythmic	9	12	0.126164	7	3	3	arrhythmic	6	12	0.996545	6	6	1	arrhythmic	6	10	0.270247	11	11	4	arrhythmic	10	2	0.00169029	12	5	2	annual	11	2	5.38685e-08	13	4	4	annual	12	1	0.00113118	14	10
OG0003632	Lthed_scf0010.1_g008130.1	Qgl_scf0020.1_g009570.1	AT4G24330.1	AT4G24330.1	0.511325	12	1	5	arrhythmic	11	10	0.00661443	15	2	1	annual	14	11	9.96474e-06	14	8	10	annual	13	12	0.0047941	23	22	19	arrhythmic	21	12	0.0482533	23	15	18	arrhythmic	21	11	0.371266	6	2	2	arrhythmic	6	11	0.00648066	13	9
OG0003633	Lthed_scf0010.1_g008100.1	Qgl_scf0020.1_g009550.1	AT1G15380.2	AT1G15380.2	1.75278e-05	13	9	9	annual	12	6	0.00272072	13	12	7	annual	12	9	0.000152844	14	13	10	annual	13	4	0.588549	6	4	3	arrhythmic	6	8	2.76362e-07	12	8	9	annual	11	5	6.89044e-06	13	12	3	annual	12	9	7.16734e-06	14	13
OG0003634	Lthed_scf0010.1_g007370.1	Qgl_scf0020.1_g008800.1			1	13	9	8	arrhythmic	12	6	0.000544082	13	6	10	annual	12	3	1	14	13	10	arrhythmic	13	4	1	18	13	14	arrhythmic	17	4	0.0192476	13	9	8	arrhythmic	12	6	0.133109	13	6	11	arrhythmic	12	3	0.000127816	14	13
OG0003637	Lthed_scf0060.1_g095960.1	Qgl_scf0090.1_g027030.1	AT1G13310.1	AT1G13310.1	0.0125545	12	11	5	arrhythmic	11	8	4.27346e-05	13	9	8	annual	12	6	0.00649068	11	7	1	annual	10	11	0.00394869	14	10	9	annual	13	1	1.00804e-05	12	11	4	annual	11	8	8.6192e-09	12	12	4	annual	11	9	0.000189665	12	3
OG0003638	Lthed_scf0060.1_g094860.1	Qgl_scf0090.1_g027300.1	AT1G25500.2	AT1G25500.2	0.4386	18	7	1	arrhythmic	17	4	0.00088307	12	5	8	annual	11	2	0.37088	12	6	1	arrhythmic	11	10	0.0424336	15	3	4	arrhythmic	14	7	0.0435134	10	4	4	arrhythmic	9	1	0.000704745	13	4	6	annual	12	1	0.992988	19	3
OG0003640	Lthed_scf0010.1_g129370.1	Qgl_scf0020.1_g121860.1	AT1G22770.1	AT1G22770.1	0.0847108	12	2	3	arrhythmic	11	11	0.0346295	6	2	4	arrhythmic	6	11	0.0161424	12	9	6	arrhythmic	11	1	0.0155266	15	8	5	arrhythmic	14	12	0.00423568	11	4	4	annual	10	1	2.41396e-05	14	2	9	annual	13	11	0.197025	13	11
OG0003641	Lthed_scf0010.1_g129210.1	Qgl_scf0020.1_g121750.1	AT4G09810.1	AT4G09810.1	0.0825053	7	1	3	arrhythmic	6	10	0.385988	13	11	11	arrhythmic	12	8	0.975138	7	1	3	arrhythmic	6	5	0.481531	7	7	3	arrhythmic	6	11	0.104467	12	7	11	arrhythmic	11	4	0.00215801	13	8	9	annual	12	5	0.226036	14	12
OG0003642	Lthed_scf0010.1_g154050.1	Qgl_scf0020.1_g163440.1	AT1G21480.1	AT1G21480.1	0.000451238	15	12	4	annual	14	9	0.215963	18	4	4	arrhythmic	17	1	0.184334	14	14	1	arrhythmic	13	5	0.00830466	16	15	4	annual	15	6	0.227061	21	3	18	arrhythmic	19	12	2.61833e-07	13	4	7	annual	12	1	0.655879	13	13
OG0003644	Lthed_scf0010.1_g198270.1	Qgl_scf0020.1_g191960.1	AT2G25970.1	AT2G25970.1	0.000119758	14	2	7	annual	13	11	0.000539281	12	4	8	annual	11	1	0.0691599	23	21	15	arrhythmic	21	12	0.00159352	23	23	10	arrhythmic	21	1	3.86583e-05	12	6	3	annual	11	3	4.64294e-06	13	5	6	annual	12	2	0.00210049	13	10
OG0003646	Lthed_scf0010.1_g195510.1	Qgl_scf0020.1_g189840.1	AT5G01450.1	AT2G38220.2	0.0929381	10	9	5	arrhythmic	9	6	0.989256	12	12	4	arrhythmic	11	9	0.555493	7	7	3	arrhythmic	6	11	0.131976	12	4	5	arrhythmic	11	8	0.0867865	12	8	2	arrhythmic	11	5	0.0408268	12	7	9	arrhythmic	11	4	0.0538511	14	11
OG0003647	Lthed_scf0080.1_g040000.1	Qgl_scf0070.1_g070580.1	AT1G54400.1	AT1G54400.1	0.000496163	14	8	13	annual	13	5	3.51282e-05	12	12	5	annual	11	9	0.00149618	14	13	13	annual	13	4	0.0985658	12	6	7	arrhythmic	11	10	1.23522e-07	12	8	10	annual	11	5	4.75946e-05	13	10	8	annual	12	7	0.798352	6	2
OG0003648	Lthed_scf0020.1_g133730.1	Qgl_scf0030.1_g044910.1	AT2G34780.1	AT2G34780.1	0.935317	6	6	4	arrhythmic	6	3	0.050494	12	2	7	arrhythmic	11	11	0.102195	7	2	4	arrhythmic	6	6	0.00469234	13	8	7	annual	12	12	0.859529	14	4	3	arrhythmic	13	1	5.75809e-06	13	3	6	annual	12	12	2.64633e-05	13	11
OG0003649	Lthed_scf0010.1_g192240.1	Qgl_scf0020.1_g186900.1	AT3G49180.1	AT3G49180.1	0.161653	13	1	11	arrhythmic	12	10	2.8526e-07	13	2	8	annual	12	11	0.17111	12	9	9	arrhythmic	11	1	0.019203	12	11	3	arrhythmic	11	2	8.96053e-06	13	6	3	annual	12	3	4.78967e-06	12	8	3	annual	11	5	0.00030285	14	12
OG0003650	Lthed_scf0010.1_g191740.1	Qgl_scf0020.1_g186550.1	AT1G45249.1	AT1G45249.1	6.51452e-07	13	12	4	annual	12	9	7.3511e-08	13	12	3	annual	12	9	0.00508092	14	3	8	annual	13	7	0.341839	6	4	3	arrhythmic	6	8	0.000124646	6	5	3	half-annual	6	2	0.00362554	23	22	21	arrhythmic	21	6	0.401305	6	5
OG0003651	Lthed_scf0010.1_g191540.1	Qgl_scf0020.1_g186400.1	AT5G42900.3	AT5G42900.3	6.48165e-05	14	2	7	annual	13	11	0.0174205	14	4	7	arrhythmic	13	1	0.00104706	12	11	7	annual	11	2	0.321787	10	8	9	arrhythmic	9	12	3.7941e-07	11	4	5	annual	10	1	5.58495e-10	13	3	9	annual	12	12	5.26617e-07	14	10
OG0003652	Lthed_scf0010.1_g189740.1	Qgl_scf0020.1_g184060.1	AT4G34310.1	AT4G34310.1	0.0627009	14	4	8	arrhythmic	13	1	0.00678887	13	9	1	annual	12	6	0.000771706	14	9	8	annual	13	1	0.0103825	12	10	9	arrhythmic	11	1	0.000420726	12	6	1	annual	11	3	0.000380634	14	5	4	annual	13	2	0.00980205	13	10
OG0003654	Lthed_scf0010.1_g188840.1	Qgl_scf0020.1_g182500.1	AT2G30440.1	AT1G06870.1	0.0220157	7	2	4	arrhythmic	6	11	0.0289637	13	4	7	arrhythmic	12	1	0.010418	13	13	4	arrhythmic	12	4	0.0272117	12	11	8	arrhythmic	11	2	0.0098707	6	3	3	half-annual	6	12	0.0659338	15	2	6	arrhythmic	14	11	0.0740398	7	2
OG0003655	Lthed_scf0010.1_g185760.1	Qgl_scf0020.1_g179480.1	AT1G19330.2	AT1G19330.2	0.0176091	17	9	12	arrhythmic	16	6	0.00272661	12	12	9	annual	11	9	0.482901	3	1	1	arrhythmic	3	5	4.35963e-06	13	4	6	annual	12	8	0.000175734	12	12	4	annual	11	9	0.000264082	14	10	7	annual	13	7	2.25663e-05	14	4
OG0003656	Lthed_scf0010.1_g185710.1	Qgl_scf0020.1_g179380.1			2.17102e-07	14	2	6	annual	13	11	5.71353e-10	13	3	9	annual	12	12	0.000606277	14	12	1	annual	13	3	0.00059374	11	11	5	annual	10	2	0.0288945	11	5	3	arrhythmic	10	2	5.01373e-07	13	3	7	annual	12	12	0.00329864	14	11
OG0003657	Lthed_scf0010.1_g185300.1	Qgl_scf0020.1_g179210.1	AT1G80950.1	AT1G80950.1	7.05859e-05	13	4	8	annual	12	1	0.0237155	14	5	4	arrhythmic	13	2	0.367887	7	4	2	arrhythmic	6	8	0.079682	12	11	4	arrhythmic	11	2	0.138925	13	5	7	arrhythmic	12	2	0.0939591	22	15	10	arrhythmic	20	11	0.00444659	14	9
OG0003660	Lthed_scf0060.1_g090720.1	Qgl_scf0090.1_g030500.1	AT3G25860.1	AT3G25860.1	0.0206441	23	13	14	arrhythmic	21	10	0.000272181	17	13	10	annual	16	10	0.230592	7	1	4	arrhythmic	6	5	0.639513	9	5	5	arrhythmic	8	9	0.228005	6	1	3	arrhythmic	6	10	0.35708	6	2	2	arrhythmic	6	11	0.510958	6	1
OG0003661	Lthed_scf0090.1_g062590.1	Qgl_scf0060.1_g049470.1	AT1G77490.1	AT1G77490.1	0.347622	11	5	4	arrhythmic	10	2	0.37521	13	13	7	arrhythmic	12	10	0.000482331	14	6	6	annual	13	10	0.0383956	13	7	7	arrhythmic	12	11	0.222863	12	8	1	arrhythmic	11	5	0.0744277	12	7	9	arrhythmic	11	4	0.000328931	13	9
OG0003662	Lthed_scf0120.1_g019150.1	Qgl_scf0120.1_g014890.1	AT4G17510.1	AT4G17510.1	1.65389e-06	15	1	8	annual	14	10	0.00411103	14	4	6	annual	13	1	0.000209504	14	8	5	annual	13	12	2.74039e-05	12	10	4	annual	11	1	0.00340142	13	5	4	annual	12	2	0.00133007	22	20	5	arrhythmic	20	4	0.51243	13	11
OG0003663	Lthed_scf0110.1_g067130.1	Qgl_scf0110.1_g026990.1	AT2G25720.1	AT2G25720.1	0.447958	15	1	10	arrhythmic	14	10	0.487542	12	7	2	arrhythmic	11	4	0.016328	14	8	11	arrhythmic	13	12	0.0156435	18	11	3	arrhythmic	17	2	0.0980782	13	3	8	arrhythmic	12	12	0.0531168	17	8	5	arrhythmic	16	5	0.00602161	15	8
OG0003666	Lthed_scf0030.1_g000400.1	Qgl_scf0010.1_g192790.1	AT3G12670.1	AT3G12670.1	7.06909e-08	14	2	7	annual	13	11	3.71325e-06	13	2	9	annual	12	11	0.00500758	14	10	3	annual	13	1	1.03643e-05	13	11	3	annual	12	2	1.1994e-10	13	4	5	annual	12	1	3.40316e-08	13	3	9	annual	12	12	1.53047e-07	14	9
OG0003668	Lthed_scf0070.1_g045050.1	Qgl_scf0080.1_g038200.1	AT1G74070.1	AT1G74070.1	0.0234059	13	13	3	arrhythmic	12	10	6.43337e-05	14	10	7	annual	13	7	0.000529747	13	1	10	annual	12	5	0.312089	11	7	4	arrhythmic	10	11	1.61793e-08	12	8	8	annual	11	5	0.00643007	12	7	10	annual	11	4	0.0385934	14	12
OG0003670	Lthed_scf0010.1_g099740.1	Qgl_scf0020.1_g094750.1	AT3G02560.3	AT3G02560.3	3.67317e-05	13	3	8	annual	12	12	5.17153e-06	14	2	7	annual	13	11	0.00482447	14	7	5	annual	13	11	0.0295521	13	6	7	arrhythmic	12	10	9.78659e-07	13	5	4	annual	12	2	0.000121304	13	3	9	annual	12	12	1.18064e-05	13	10
OG0003671	Lthed_scf0070.1_g050850.1	Qgl_scf0080.1_g044270.1	AT3G18270.1	AT3G18270.1	3.44291e-05	16	8	10	annual	15	5	0.00091711	13	12	5	annual	12	9	0.480093	16	10	15	arrhythmic	15	1	0.00768847	13	1	7	annual	12	5	0.012559	13	7	10	arrhythmic	12	4	1.84006e-05	13	8	8	annual	12	5	0.106659	6	1
OG0003672	Lthed_scf0070.1_g060010.1	Qgl_scf0080.1_g052030.1	AT3G17860.1	AT3G17860.1	0.610117	13	9	8	arrhythmic	12	6	9.63235e-05	13	10	6	annual	12	7	3.84118e-05	13	1	9	annual	12	5	4.27827e-07	12	4	5	annual	11	8	0.000552224	11	8	5	annual	10	5	0.000622789	13	7	10	annual	12	4	0.0127489	13	13
OG0003673	Lthed_scf0070.1_g060150.1	Qgl_scf0080.1_g052160.1	AT3G17850.1	AT3G17850.1	0.000129165	13	8	11	annual	12	5	0.993699	7	3	4	arrhythmic	6	12	0.593762	15	13	9	arrhythmic	14	4	0.0765058	10	3	7	arrhythmic	9	7	0.143213	13	10	10	arrhythmic	12	7	0.00166914	13	1	7	annual	12	10	0.24415	17	4
OG0003674	Lthed_scf0070.1_g061990.1	Qgl_scf0080.1_g054120.1	AT1G48450.1	AT1G48450.1	0.000521311	13	11	6	annual	12	8	0.00570064	13	11	4	annual	12	8	0.00629447	14	3	10	annual	13	7	0.46706	6	4	3	arrhythmic	6	8	0.00392451	6	5	3	half-annual	6	2	1.89549e-05	14	10	7	annual	13	7	0.545746	6	6
OG0003675	Lthed_scf0120.1_g080410.1	Qgl_scf0120.1_g071450.1	AT1G09960.1	AT1G09960.1	0.0110816	16	1	7	arrhythmic	15	10	0.00044719	15	1	8	annual	14	10	0.00846688	13	7	12	annual	12	11	0.862048	12	7	5	arrhythmic	11	11	1.53823e-05	13	3	3	annual	12	12	0.018167	15	1	7	arrhythmic	14	10	0.0175168	7	1
OG0003676	Lthed_scf0120.1_g080770.1	Qgl_scf0120.1_g071680.1	AT5G49660.1	AT5G49660.1	0.114549	7	6	3	arrhythmic	6	3	0.00700646	13	10	6	annual	12	7	0.554359	14	5	4	arrhythmic	13	9	0.000162843	12	5	6	annual	11	9	0.932047	13	10	7	arrhythmic	12	7	0.0856392	13	5	5	arrhythmic	12	2	0.0358381	13	2
OG0003678	Lthed_scf0080.1_g095810.1	Qgl_scf0070.1_g017150.1		AT5G20700.1	0.00124756	13	12	5	annual	12	9	0.00752267	12	10	9	annual	11	7	0.000109921	14	3	6	annual	13	7	3.03274e-07	12	4	7	annual	11	8	0.0173126	6	5	3	arrhythmic	6	2	1.38113e-05	13	5	4	annual	12	2	0.504746	14	3
OG0003679	Lthed_scf0010.1_g020560.1	Qgl_scf0020.1_g019880.1	AT5G57830.1	AT5G57830.1	1	14	8	12	arrhythmic	13	5	0.000211641	13	7	2	annual	12	4	0.940459	3	2	1	arrhythmic	3	6	0.0595311	13	12	2	arrhythmic	12	3	0.000266219	13	9	9	annual	12	6	0.00255767	12	1	3	annual	11	10	0.0319103	14	10
OG0003680	Lthed_scf0010.1_g020890.1	Qgl_scf0020.1_g020200.1	AT4G30710.3	AT4G30710.3	0.370775	13	8	6	arrhythmic	12	5	0.354903	13	11	7	arrhythmic	12	8	0.0369173	8	5	4	arrhythmic	7	9	0.0264176	13	1	10	arrhythmic	12	5	0.3623	12	7	11	arrhythmic	11	4	0.00221065	13	10	8	annual	12	7	0.958596	6	1
OG0003683	Lthed_scf0010.1_g022490.1	Qgl_scf0020.1_g021840.1	AT5G57990.1	AT5G57990.1	0.0120088	13	11	7	arrhythmic	12	8	0.000390082	13	9	9	annual	12	6	0.000813225	13	3	11	annual	12	7	3.86031e-05	14	3	7	annual	13	7	0.157259	13	10	11	arrhythmic	12	7	0.000211718	15	4	5	annual	14	1	9.21672e-06	13	11
OG0003686	Lthed_scf0070.1_g073130.1	Qgl_scf0080.1_g067950.1	AT5G08450.3	AT5G08450.3	0.0409538	14	8	8	arrhythmic	13	5	0.108364	21	5	10	arrhythmic	19	2	0.301795	10	1	4	arrhythmic	9	5	0.592002	10	2	5	arrhythmic	9	6	0.00892847	12	3	4	annual	11	12	0.00293076	16	9	10	annual	15	6	0.0332227	23	21
OG0003690	Lthed_scf0030.1_g149990.1	Qgl_scf0010.1_g011850.1	AT3G52110.2	AT3G52110.1	1	8	1	3	arrhythmic	7	10	0.407894	15	13	1	arrhythmic	14	10	0.120275	15	12	8	arrhythmic	14	3	0.0892129	12	12	7	arrhythmic	11	3	0.00120759	12	7	11	annual	11	4	4.67889e-07	13	10	7	annual	12	7	0.00140616	14	12
OG0003691	Lthed_scf0030.1_g143680.1	Qgl_scf0010.1_g028000.1	AT3G51950.4	AT3G51950.4	5.59789e-05	12	10	4	annual	11	7	0.0247087	6	6	2	arrhythmic	6	3	0.000187087	14	13	7	annual	13	4	0.000826782	10	3	6	annual	9	7	1.0361e-05	12	12	4	annual	11	9	0.0429114	18	4	6	arrhythmic	17	1	0.00640107	14	3
OG0003694	Lthed_scf0030.1_g131780.1	Qgl_scf0010.1_g044100.1	AT2G38720.1	AT2G38720.1	0.263305	12	6	5	arrhythmic	11	3	0.0515221	4	4	2	arrhythmic	4	1	0.15837	15	4	11	arrhythmic	14	8	0.12914	7	7	2	arrhythmic	6	11	0.0765165	12	7	10	arrhythmic	11	4	2.59477e-08	13	10	6	annual	12	7	0.000741852	7	5
OG0003695	Lthed_scf0030.1_g131320.1	Qgl_scf0010.1_g045070.1	AT3G12390.1	AT3G12390.1	6.60011e-06	13	5	5	annual	12	2	0.00138484	12	3	6	annual	11	12	0.000747445	15	8	8	annual	14	12	0.000582629	11	11	3	annual	10	2	4.37591e-07	12	4	6	annual	11	1	0.000416259	13	4	8	annual	12	1	4.42307e-06	13	11
OG0003696	Lthed_scf0030.1_g127770.1	Qgl_scf0010.1_g049490.1	AT5G58220.1	AT5G58220.1	1.6757e-07	13	4	8	annual	12	1	3.50065e-09	13	4	8	annual	12	1	0.153565	13	11	4	arrhythmic	12	2	0.00454264	14	10	10	annual	13	1	0.146972	12	4	7	arrhythmic	11	1	0.543095	13	8	6	arrhythmic	12	5	0.316085	23	13
OG0003698	Lthed_scf0030.1_g119700.1	Qgl_scf0010.1_g060050.1	AT3G60260.4	AT3G60260.4	0.212668	19	3	17	arrhythmic	17	12	0.668377	12	12	9	arrhythmic	11	9	0.96805	13	1	6	arrhythmic	12	5	0.142249	7	7	3	arrhythmic	6	11	0.000326767	12	8	9	annual	11	5	7.66219e-09	13	11	5	annual	12	8	4.01319e-07	14	12
OG0003699	Lthed_scf0030.1_g119350.1	Qgl_scf0010.1_g060630.1	AT1G02120.1	AT1G02120.1	0.0904345	13	9	10	arrhythmic	12	6	0.986732	6	6	1	arrhythmic	6	3	0.133804	13	10	10	arrhythmic	12	1	0.00033832	13	9	8	annual	12	12	0.179509	10	4	3	arrhythmic	9	1	0.0616264	13	1	4	arrhythmic	12	10	0.000699098	7	3
OG0003702	Lthed_scf0030.1_g112300.1	Qgl_scf0010.1_g068040.1	AT2G44980.3	AT2G44980.3	0.0211552	13	5	8	arrhythmic	12	2	0.94647	13	9	6	arrhythmic	12	6	0.00549213	12	11	4	annual	11	2	0.000108181	12	11	5	annual	11	2	0.0141463	14	4	7	arrhythmic	13	1	0.0435314	15	4	5	arrhythmic	14	1	0.892214	6	5
OG0003704	Lthed_scf0030.1_g109280.1	Qgl_scf0010.1_g071000.1	AT2G45050.1	AT2G45050.1	1	11	8	3	arrhythmic	10	5	0.629299	13	11	10	arrhythmic	12	8	1	14	13	9	arrhythmic	13	4	0.849043	11	3	5	arrhythmic	10	7	0.00120163	12	1	2	annual	11	10	3.26191e-10	13	10	6	annual	12	7	0.544962	23	3
OG0003705	Lthed_scf0030.1_g104490.1	Qgl_scf0010.1_g077880.1	AT2G45130.1	AT2G45130.1	0.00232868	15	9	9	annual	14	6	0.0561523	13	6	7	arrhythmic	12	3	0.609912	18	17	6	arrhythmic	17	8	0.0643792	12	10	11	arrhythmic	11	1	0.000400078	13	11	7	annual	12	8	5.12385e-07	14	12	6	annual	13	9	0.153908	14	8
OG0003707	Lthed_scf0030.1_g100060.1	Qgl_scf0010.1_g080630.1	AT2G45190.1	AT2G45190.1	1	14	8	10	arrhythmic	13	5	1	13	11	9	arrhythmic	12	8	0.000420274	14	13	9	annual	13	4	3.31485e-05	12	4	6	annual	11	8	0.00864742	6	1	4	half-annual	6	10	8.8509e-05	13	10	6	annual	12	7	0.0111195	13	7
OG0003709	Lthed_scf0030.1_g098510.1	Qgl_scf0010.1_g082340.1	AT5G04510.1	AT5G04510.1	3.81321e-05	14	8	7	annual	13	5	0.142817	13	4	10	arrhythmic	12	1	0.0263072	13	13	7	arrhythmic	12	4	0.0639009	20	14	8	arrhythmic	18	5	0.233982	12	7	10	arrhythmic	11	4	0.00996914	12	8	10	annual	11	5	0.252742	13	13
OG0003711	Lthed_scf0030.1_g089990.1	Qgl_scf0010.1_g094970.1	AT5G04740.1	AT5G04740.1	0.217372	9	2	6	arrhythmic	8	11	4.83119e-05	12	9	8	annual	11	6	0.270345	14	7	1	arrhythmic	13	11	0.0215882	12	6	4	arrhythmic	11	10	0.0459838	10	10	4	arrhythmic	9	7	3.21814e-10	13	11	6	annual	12	8	0.0311694	13	4
OG0003713	Lthed_scf0030.1_g084410.1	Qgl_scf0010.1_g101330.1	AT3G10640.1	AT3G10640.1	0.0755394	18	3	16	arrhythmic	17	12	0.528753	19	5	10	arrhythmic	17	2	0.908552	14	13	6	arrhythmic	13	4	0.0534373	23	9	16	arrhythmic	21	12	0.943994	7	1	3	arrhythmic	6	10	1.09925e-05	14	8	11	annual	13	5	0.00289935	13	1
OG0003714	Lthed_scf0030.1_g081620.1	Qgl_scf0010.1_g103930.1	AT3G10670.1	AT3G10670.1	0.486311	13	13	2	arrhythmic	12	10	0.000215489	12	1	6	annual	11	10	0.938702	7	7	5	arrhythmic	6	11	0.179327	7	5	5	arrhythmic	6	9	0.00489858	12	7	9	annual	11	4	0.00454084	13	10	7	annual	12	7	0.000116516	13	13
OG0003715	Lthed_scf0030.1_g080720.1	Qgl_scf0010.1_g105450.1	AT5G04885.2	AT5G04885.2	0.273729	14	5	12	arrhythmic	13	2	0.0145437	7	5	4	arrhythmic	6	2	0.00956527	12	10	4	annual	11	1	0.00612224	15	8	9	annual	14	12	0.000317249	6	2	3	half-annual	6	11	3.88248e-06	13	8	9	annual	12	5	4.21498e-05	13	8
OG0003717	Lthed_scf0030.1_g078490.1	Qgl_scf0010.1_g107090.1	AT2G27100.1	AT2G27100.1	0.407519	12	12	3	arrhythmic	11	9	0.366967	13	10	6	arrhythmic	12	7	6.17316e-05	14	3	5	annual	13	7	0.021482	19	3	7	arrhythmic	17	7	0.074614	13	4	5	arrhythmic	12	1	0.00216576	15	8	10	annual	14	5	0.0658346	10	3
OG0003719	Lthed_scf0010.1_g085840.1	Qgl_scf0020.1_g082780.1	AT5G48630.1	AT5G48630.1	0.0217451	14	7	1	arrhythmic	13	4	0.128249	13	8	5	arrhythmic	12	5	0.787499	7	5	1	arrhythmic	6	9	0.243634	11	10	5	arrhythmic	10	1	0.129712	12	5	2	arrhythmic	11	2	0.966463	7	3	4	arrhythmic	6	12	0.000672513	14	11
OG0003720	Lthed_scf0090.1_g097090.1	Qgl_scf0060.1_g011850.1	AT3G25290.2	AT3G25290.2	0.797665	9	9	3	arrhythmic	8	6	0.0621583	14	1	8	arrhythmic	13	10	0.0492186	13	8	9	arrhythmic	12	12	8.21178e-06	12	9	5	annual	11	12	0.10815	11	5	3	arrhythmic	10	2	0.000200431	14	1	9	annual	13	10	0.0102275	7	2
OG0003721	Lthed_scf0100.1_g075380.1	Qgl_scf0100.1_g038910.1	AT3G07870.1	AT3G07870.1	2.21061e-05	15	4	5	annual	14	1	0.00736975	12	3	9	annual	11	12	0.196834	23	16	21	arrhythmic	21	7	0.0510018	15	3	9	arrhythmic	14	7	0.240124	13	5	4	arrhythmic	12	2	5.70917e-05	14	3	8	annual	13	12	0.103263	14	7
OG0003726	Lthed_scf0060.1_g048020.1	Qgl_scf0090.1_g072070.1	AT5G58350.1	AT5G58350.1	0.00142116	16	3	5	annual	15	12	6.56775e-05	13	3	10	annual	12	12	0.13885	7	5	2	arrhythmic	6	9	0.00329841	12	12	4	annual	11	3	0.0366736	6	5	3	arrhythmic	6	2	1.09927e-08	13	5	6	annual	12	2	0.999338	7	3
OG0003728	Lthed_scf0060.1_g050840.1	Qgl_scf0090.1_g069800.1	AT5G07120.2	AT5G07120.2	0.302425	9	3	6	arrhythmic	8	12	0.0197009	7	3	2	arrhythmic	6	12	0.135209	7	3	3	arrhythmic	6	7	0.0622699	12	10	9	arrhythmic	11	1	0.0156327	6	5	3	arrhythmic	6	2	0.0367673	12	4	2	arrhythmic	11	1	0.0475931	12	12
OG0003731	Lthed_scf0060.1_g072640.1	Qgl_scf0090.1_g045970.1	AT2G29760.1	AT2G29760.1	0.039422	7	5	4	arrhythmic	6	2	0.000696638	13	13	3	annual	12	10	0.0640355	15	3	6	arrhythmic	14	7	0.0280617	14	6	2	arrhythmic	13	10	0.00988084	6	6	3	half-annual	6	3	0.110214	6	2	2	arrhythmic	6	11	0.953675	7	5
OG0003734	Lthed_scf0060.1_g052710.1	Qgl_scf0090.1_g067400.1	AT5G58930.1	AT5G58930.1	0.000490167	13	10	6	annual	12	7	7.11411e-09	13	12	4	annual	12	9	0.00130098	14	13	11	annual	13	4	0.000209936	13	2	7	annual	12	6	0.00390288	12	12	3	annual	11	9	0.0114539	13	13	2	arrhythmic	12	10	3.80439e-05	14	3
OG0003737	Lthed_scf0060.1_g059270.1	Qgl_scf0090.1_g060370.1	AT2G29070.2	AT2G29070.2	0.148263	22	21	4	arrhythmic	20	5	0.00100621	14	7	2	annual	13	4	0.00106205	12	12	5	annual	11	3	0.0883543	11	11	5	arrhythmic	10	2	5.49718e-05	13	3	9	annual	12	12	2.84193e-05	14	5	5	annual	13	2	6.52944e-07	13	9
OG0003738	Lthed_scf0060.1_g061370.1	Qgl_scf0090.1_g058280.1	AT2G28900.1	AT2G28900.1	6.73e-07	15	3	6	annual	14	12	5.6703e-08	13	3	9	annual	12	12	1.23206e-05	13	11	6	annual	12	2	0.000625333	14	9	8	annual	13	12	9.99668e-10	12	5	3	annual	11	2	1.26695e-11	14	3	8	annual	13	12	3.82486e-05	13	11
OG0003741	Lthed_scf0060.1_g064050.1	Qgl_scf0090.1_g055670.1	AT5G59800.1	AT5G59800.1	2.75232e-05	14	8	10	annual	13	5	7.53452e-05	13	12	5	annual	12	9	0.000453556	14	13	13	annual	13	4	5.76105e-06	14	3	7	annual	13	7	0.000148672	13	12	4	annual	12	9	2.61023e-07	13	11	6	annual	12	8	0.065589	14	3
OG0003743	Lthed_scf0060.1_g064060.1	Qgl_scf0090.1_g055660.1	AT3G55350.1	AT3G55350.1	0.122085	7	1	2	arrhythmic	6	10	0.413456	10	7	5	arrhythmic	9	4	0.142494	13	12	4	arrhythmic	12	3	0.0531929	12	2	9	arrhythmic	11	6	0.471551	5	1	4	arrhythmic	5	10	0.192978	11	7	7	arrhythmic	10	4	0.279456	6	2
OG0003745	Lthed_scf0060.1_g043260.1	Qgl_scf0090.1_g076170.1	AT2G28470.5	AT2G28470.3	0.33939	13	3	9	arrhythmic	12	12	0.0163888	11	1	8	arrhythmic	10	10	0.114813	14	10	6	arrhythmic	13	1	0.00834408	15	15	1	annual	14	6	0.00113384	6	2	3	half-annual	6	11	0.040903	14	2	2	arrhythmic	13	11	9.43987e-05	14	8
OG0003747	Lthed_scf0060.1_g041740.1	Qgl_scf0090.1_g076970.1	AT2G28310.3	AT2G28310.3	0.189411	14	8	13	arrhythmic	13	5	0.661474	11	1	10	arrhythmic	10	10	0.0197661	14	13	4	arrhythmic	13	4	0.201406	7	7	4	arrhythmic	6	11	4.70588e-05	6	2	3	half-annual	6	11	0.468106	13	12	3	arrhythmic	12	9	0.0421766	10	10
OG0003748	Lthed_scf0060.1_g028100.1	Qgl_scf0090.1_g088410.1	AT4G05160.1	AT4G05160.1	0.000117598	12	6	6	annual	11	3	0.0394478	15	2	9	arrhythmic	14	11	0.001174	23	15	20	arrhythmic	21	6	0.00813568	12	5	5	annual	11	9	0.0429195	14	5	6	arrhythmic	13	2	0.998725	13	9	9	arrhythmic	12	6	6.14344e-06	14	10
OG0003750	Lthed_scf0060.1_g018780.1	Qgl_scf0090.1_g103720.1	AT2G26980.4	AT2G26980.3	9.14593e-09	13	10	7	annual	12	7	0.0731663	13	12	6	arrhythmic	12	9	2.36323e-06	14	13	10	annual	13	4	0.395935	13	5	2	arrhythmic	12	9	0.443086	19	4	8	arrhythmic	17	1	6.72392e-05	13	12	6	annual	12	9	5.03517e-05	14	3
OG0003753	Lthed_scf0060.1_g036020.1	Qgl_scf0090.1_g080970.1	AT1G08465.1	AT1G08465.1	0.00242096	10	9	4	annual	9	6	0.0032387	14	2	7	annual	13	11	0.0155819	14	14	2	arrhythmic	13	5	0.00801307	23	15	11	arrhythmic	21	6	0.0164138	6	1	4	arrhythmic	6	10	0.000668673	12	8	6	annual	11	5	0.0525889	12	9
OG0003756	Lthed_scf0060.1_g004960.1	Qgl_scf0090.1_g097150.1	AT2G27260.1	AT2G27260.1	0.268438	12	1	7	arrhythmic	11	10	0.710762	5	5	2	arrhythmic	5	2	0.00104857	13	3	7	annual	12	7	0.0162982	13	2	9	arrhythmic	12	6	0.00691415	12	5	2	annual	11	2	0.161095	7	3	3	arrhythmic	6	12	0.957067	13	2
OG0003757	Lthed_scf0060.1_g005000.1	Qgl_scf0090.1_g097110.1	AT1G75660.1	AT1G75660.1	0.0360668	12	10	5	arrhythmic	11	7	0.00930576	13	13	4	annual	12	10	4.94995e-07	13	4	6	annual	12	8	0.0319774	14	2	5	arrhythmic	13	6	6.33379e-05	12	8	8	annual	11	5	0.000976275	13	8	7	annual	12	5	0.232734	15	12
OG0003762	Lthed_scf0060.1_g029440.1	Qgl_scf0090.1_g087480.1	AT2G26770.3	AT2G26770.3	0.849309	6	3	3	arrhythmic	6	12	0.0469299	15	3	7	arrhythmic	14	12	0.986932	9	4	4	arrhythmic	8	8	0.0463854	12	5	6	arrhythmic	11	9	1.11029e-07	13	8	9	annual	12	5	2.02059e-05	13	9	7	annual	12	6	0.980317	7	1
OG0003763	Lthed_scf0050.1_g121810.1	Qgl_scf0040.1_g151140.1	AT1G27040.3	AT1G59740.1	1	13	9	6	arrhythmic	12	6	1	12	12	3	arrhythmic	11	9	1	2	1	1	arrhythmic	2	5	1	13	2	6	arrhythmic	12	6	0.0012454	12	9	8	annual	11	6	0.00210648	14	9	7	annual	13	6	0.0215368	13	7
OG0003765	Lthed_scf0060.1_g030220.1	Qgl_scf0090.1_g086800.1	AT5G07990.1	AT5G07990.1	1	2	2	1	arrhythmic	2	11	0.24034	6	6	3	arrhythmic	6	3	1	23	13	21	arrhythmic	21	4	3.39131e-07	12	3	6	annual	11	7	0.500438	13	12	4	arrhythmic	12	9	0.000833423	13	6	11	annual	12	3	5.63191e-07	14	3
OG0003766	Lthed_scf0060.1_g031080.1	Qgl_scf0090.1_g086280.1	AT5G12330.4	AT5G12330.4	0.175613	14	13	4	arrhythmic	13	10	0.00887754	7	6	3	half-annual	6	3	0.0209084	18	10	13	arrhythmic	17	1	0.00792789	14	1	8	annual	13	5	0.400898	4	2	2	arrhythmic	4	11	0.678881	7	5	5	arrhythmic	6	2	0.377721	14	1
OG0003767	Lthed_scf0060.1_g031310.1	Qgl_scf0090.1_g086010.1	AT4G03250.1	AT4G03250.1	0.413368	7	3	2	arrhythmic	6	12	0.483917	12	5	6	arrhythmic	11	2	0.903277	10	7	9	arrhythmic	9	11	0.0152017	11	11	6	arrhythmic	10	2	0.0197479	12	4	3	arrhythmic	11	1	0.0460806	13	4	6	arrhythmic	12	1	0.00575347	14	10
OG0003768	Lthed_scf0060.1_g031220.1	Qgl_scf0090.1_g086160.1	AT5G19420.1	AT5G19420.1	0.38612	4	4	2	arrhythmic	4	1	0.0664916	13	3	12	arrhythmic	12	12	0.00642218	13	12	2	annual	12	3	7.55355e-06	12	9	10	annual	11	12	0.0083857	6	4	3	half-annual	6	1	0.0192347	13	4	4	arrhythmic	12	1	0.00438586	7	3
OG0003774	Lthed_scf0060.1_g128950.1	Qgl_scf0090.1_g003240.1	AT5G36890.1	AT5G36890.1	0.251391	13	2	7	arrhythmic	12	11	8.33535e-08	13	3	8	annual	12	12	0.052263	13	4	10	arrhythmic	12	8	0.00512813	13	5	5	annual	12	9	0.0172884	12	3	5	arrhythmic	11	12	1.95711e-09	13	3	6	annual	12	12	0.0295627	23	23
OG0003775	Lthed_scf0060.1_g034110.1	Qgl_scf0090.1_g083550.1	AT5G60900.1	AT5G60900.1	1	3	3	1	arrhythmic	3	12	0.999978	12	8	3	arrhythmic	11	5	0.999967	8	1	5	arrhythmic	7	5	0.158426	12	11	8	arrhythmic	11	2	0.00700958	12	3	7	annual	11	12	0.2617	15	7	3	arrhythmic	14	4	1.97704e-06	13	4
OG0003776	Lthed_scf0060.1_g001660.1	Qgl_scf0090.1_g099690.1	AT5G13020.1	AT5G13020.1	0.000262632	12	5	7	annual	11	2	0.00153204	12	10	2	annual	11	7	0.812928	12	12	1	arrhythmic	11	3	0.998249	6	4	4	arrhythmic	6	8	5.93207e-07	12	5	3	annual	11	2	1.35917e-11	14	4	6	annual	13	1	0.000127559	13	10
OG0003778	Lthed_scf0060.1_g019690.1	Qgl_scf0090.1_g102670.1	AT1G55260.1	AT1G55260.2	1.79874e-15	13	10	7	annual	12	7	2.58979e-11	13	12	5	annual	12	9	1.08383e-06	13	1	10	annual	12	5	0.000816377	12	3	9	annual	11	7	0.0329256	13	1	2	arrhythmic	12	10	0.185821	13	1	10	arrhythmic	12	10	0.00109738	12	6
OG0003783	Lthed_scf0080.1_g038270.1	Qgl_scf0070.1_g071590.1	AT5G44750.1	AT5G44750.1	0.0224651	17	4	5	arrhythmic	16	1	0.00166822	15	3	11	annual	14	12	0.811848	20	4	3	arrhythmic	18	8	0.00815214	13	13	2	annual	12	4	0.000798181	13	4	4	annual	12	1	5.39726e-05	13	5	2	annual	12	2	0.0470101	12	12
OG0003786	Lthed_scf0080.1_g074790.1	Qgl_scf0070.1_g038090.1	AT4G33500.1	AT4G33500.1	0.00236598	14	10	6	annual	13	7	0.000160998	14	9	9	annual	13	6	0.000349819	14	3	6	annual	13	7	0.000743776	11	6	5	annual	10	10	0.00447969	13	10	5	annual	12	7	0.506422	20	3	13	arrhythmic	18	12	0.246226	7	4
OG0003788	Lthed_scf0010.1_g011690.1	Qgl_scf0020.1_g012220.1	AT4G25980.1	AT4G25980.1	0.999995	23	8	18	arrhythmic	21	5	1	12	12	6	arrhythmic	11	9	1	14	13	9	arrhythmic	13	4	0.00144304	17	14	15	annual	16	5	0.081019	10	9	7	arrhythmic	9	6	1.89585e-07	14	10	6	annual	13	7	0.000946203	13	5
OG0003794	Lthed_scf0020.1_g161460.1	Qgl_scf0030.1_g019930.1	AT1G61667.1	AT1G61667.1	0.4931	20	13	12	arrhythmic	18	10	0.0228044	21	15	9	arrhythmic	19	11	0.326516	23	1	5	arrhythmic	21	5	0.0537525	18	15	17	arrhythmic	17	6	0.147883	9	6	4	arrhythmic	8	3	0.0406514	11	4	7	arrhythmic	10	1	0.318061	7	2
OG0003797	Lthed_scf0080.1_g019960.1	Qgl_scf0070.1_g092760.1	AT2G21540.6	AT2G21540.6	0.74711	12	5	6	arrhythmic	11	2	0.0450444	15	1	10	arrhythmic	14	10	0.999996	14	13	4	arrhythmic	13	4	0.999983	5	5	3	arrhythmic	5	9	0.0165089	13	6	12	arrhythmic	12	3	0.0187756	13	8	7	arrhythmic	12	5	0.0356739	16	13
OG0003801	Lthed_scf0080.1_g009940.1	Qgl_scf0070.1_g105210.1	AT5G47900.8	AT5G47900.8	0.993943	5	3	3	arrhythmic	5	12	0.0788964	9	3	4	arrhythmic	8	12	0.162545	7	6	4	arrhythmic	6	10	0.800409	7	7	2	arrhythmic	6	11	0.84452	6	1	5	arrhythmic	6	10	0.221527	10	2	2	arrhythmic	9	11	0.978348	7	6
OG0003803	Lthed_scf0040.1_g115140.1	Qgl_scf0050.1_g026650.1	AT1G50910.1	AT1G50910.1	0.878902	13	8	1	arrhythmic	12	5	0.967335	7	1	2	arrhythmic	6	10	1.04329e-06	13	10	6	annual	12	1	0.00241401	13	11	5	annual	12	2	0.00673909	11	4	7	annual	10	1	0.45763	7	6	3	arrhythmic	6	3	3.48693e-05	13	12
OG0003804	Lthed_scf0080.1_g001860.1	Qgl_scf0070.1_g115950.1	AT2G33700.1	AT2G33700.1	0.0032115	13	4	8	annual	12	1	0.624846	6	4	3	arrhythmic	6	1	0.0043915	7	4	2	half-annual	6	8	0.0112159	14	10	10	arrhythmic	13	1	0.000843157	12	4	8	annual	11	1	0.0300744	14	3	8	arrhythmic	13	12	0.00172268	14	11
OG0003807	Lthed_scf0050.1_g041440.1	Qgl_scf0040.1_g048990.1	AT5G64680.2	AT5G64680.2	0.890055	7	1	3	arrhythmic	6	10	0.0174152	12	12	4	arrhythmic	11	9	0.631661	11	3	7	arrhythmic	10	7	0.000734253	13	6	2	annual	12	10	1.02806e-05	12	5	5	annual	11	2	0.0985898	14	3	13	arrhythmic	13	12	0.1099	14	12
OG0003816	Lthed_scf0120.1_g009170.1	Qgl_scf0120.1_g007720.1	AT4G17900.1	AT4G17900.1	0.0169342	12	12	3	arrhythmic	11	9	0.0098089	11	9	4	annual	10	6	0.00744117	13	3	5	annual	12	7	0.00185281	13	4	4	annual	12	8	0.0920184	6	5	3	arrhythmic	6	2	0.339695	18	6	14	arrhythmic	17	3	0.057634	12	5
OG0003817	Lthed_scf0050.1_g064470.1	Qgl_scf0040.1_g070260.1	AT5G01180.3	AT2G02040.1	0.296694	6	4	3	arrhythmic	6	1	0.832733	12	4	11	arrhythmic	11	1	0.973998	7	5	5	arrhythmic	6	9	0.68647	6	4	4	arrhythmic	6	8	0.00197819	6	3	3	half-annual	6	12	0.0722819	12	4	2	arrhythmic	11	1	0.840265	13	11
OG0003818	Lthed_scf0020.1_g138450.1	Qgl_scf0030.1_g041200.1	AT1G28560.3	AT1G28560.3	0.417875	7	4	4	arrhythmic	6	1	2.61121e-05	13	4	8	annual	12	1	0.000284655	14	11	2	annual	13	2	3.00043e-05	13	10	4	annual	12	1	2.53839e-06	12	4	4	annual	11	1	6.33874e-08	13	4	6	annual	12	1	2.44388e-05	13	10
OG0003820	Lthed_scf0010.1_g083740.1	Qgl_scf0020.1_g080750.1	AT3G53260.1	AT3G53260.1	0.815602	13	3	6	arrhythmic	12	12	0.0554451	13	6	5	arrhythmic	12	3	2.4103e-05	15	11	6	annual	14	2	0.305426	11	10	8	arrhythmic	10	1	0.971077	6	3	3	arrhythmic	6	12	0.0372795	18	15	1	arrhythmic	17	11	0.00112437	15	14
OG0003824	Lthed_scf0050.1_g069830.1	Qgl_scf0040.1_g075970.1	AT1G68020.3	AT1G68020.3	0.00344535	7	4	4	half-annual	6	1	0.000423993	15	2	10	annual	14	11	0.190166	13	10	4	arrhythmic	12	1	0.00173115	13	8	11	annual	12	12	0.0388566	6	4	4	arrhythmic	6	1	0.0105764	13	3	11	arrhythmic	12	12	0.0107559	6	5
OG0003830	Lthed_scf0090.1_g068790.1	Qgl_scf0060.1_g043550.1	AT1G77720.1	AT1G77720.1	2.68184e-06	13	4	7	annual	12	1	1.26249e-05	14	2	7	annual	13	11	0.000826651	13	8	6	annual	12	12	0.540997	6	1	4	arrhythmic	6	5	0.000315336	12	4	7	annual	11	1	0.951528	4	4	2	arrhythmic	4	1	0.000191615	14	12
OG0003833	Lthed_scf0030.1_g154380.1	Qgl_scf0010.1_g007980.1	AT3G59550.1	AT3G59550.1	1	20	11	8	arrhythmic	18	8	0.975204	5	2	3	arrhythmic	5	11	1	14	13	10	arrhythmic	13	4	1	11	5	5	arrhythmic	10	9	0.0713425	6	1	3	arrhythmic	6	10	0.00146	13	10	5	annual	12	7	0.0158598	7	5
OG0003836	Lthed_scf0090.1_g023000.1	Qgl_scf0060.1_g090730.1	AT5G25500.1	AT5G25500.1	0.00379976	13	7	1	annual	12	4	0.14972	13	1	11	arrhythmic	12	10	0.967724	15	7	9	arrhythmic	14	11	0.00176804	6	1	3	half-annual	6	5	0.461772	12	6	4	arrhythmic	11	3	0.000841437	14	4	8	annual	13	1	0.99724	5	1
OG0003842	Lthed_scf0100.1_g085410.1	Qgl_scf0100.1_g018670.1	AT5G66930.2	AT5G66930.2	0.0203677	9	3	5	arrhythmic	8	12	0.00238012	13	10	3	annual	12	7	0.0503134	7	5	1	arrhythmic	6	9	3.43222e-05	15	2	6	annual	14	6	0.417094	12	6	1	arrhythmic	11	3	0.611327	13	5	6	arrhythmic	12	2	0.989117	6	5
OG0003844	Lthed_scf0100.1_g086450.1	Qgl_scf0100.1_g018040.1	AT2G23460.1	AT2G23460.1	0.278727	14	5	11	arrhythmic	13	2	3.61944e-05	14	6	9	annual	13	3	0.00535203	13	12	5	annual	12	3	0.00110967	13	13	7	annual	12	4	0.00291735	6	5	2	half-annual	6	2	0.350699	18	4	6	arrhythmic	17	1	0.00331872	20	4
OG0003845	Lthed_scf0100.1_g087100.1	Qgl_scf0100.1_g017490.1	AT5G66600.9	AT5G66600.9	1.04648e-10	13	9	7	annual	12	6	2.63808e-09	13	11	7	annual	12	8	4.03539e-08	14	13	10	annual	13	4	1.06446e-07	13	3	7	annual	12	7	3.68042e-08	12	10	5	annual	11	7	4.10048e-08	13	10	7	annual	12	7	0.000683145	14	2
OG0003846	Lthed_scf0100.1_g088710.1	Qgl_scf0100.1_g015640.1	AT4G36760.1	AT4G36760.1	0.35241	23	5	19	arrhythmic	21	2	0.0293165	23	3	14	arrhythmic	21	12	0.00195098	13	4	6	annual	12	8	0.00107191	12	4	7	annual	11	8	0.000476693	13	3	7	annual	12	12	0.0899562	20	9	6	arrhythmic	18	6	0.0282657	7	6
OG0003848	Lthed_scf0100.1_g090110.1	Qgl_scf0100.1_g014810.1	AT3G50670.1	AT3G50670.1	0.000550855	11	4	5	annual	10	1	0.0223438	23	10	3	arrhythmic	21	7	0.34525	13	10	5	arrhythmic	12	1	2.63778e-05	13	4	6	annual	12	8	0.0591765	23	3	17	arrhythmic	21	12	0.0258575	23	4	17	arrhythmic	21	1	5.191e-07	13	10
OG0003851	Lthed_scf0040.1_g033730.1	Qgl_scf0050.1_g104080.1	AT4G00720.1	AT4G00720.1	4.53056e-05	12	1	4	annual	11	10	0.000298556	13	13	2	annual	12	10	0.000294271	13	2	10	annual	12	6	0.432498	10	3	6	arrhythmic	9	7	0.000250373	12	12	3	annual	11	9	6.759e-07	13	12	5	annual	12	9	0.0026693	13	6
OG0003852	Lthed_scf0040.1_g034960.1	Qgl_scf0050.1_g102750.1	AT2G45790.1	AT2G45790.1	0.248904	6	4	2	arrhythmic	6	1	3.70588e-05	16	1	8	annual	15	10	0.00285133	13	1	2	annual	12	5	0.013164	16	15	2	arrhythmic	15	6	0.00388966	12	8	9	annual	11	5	0.0900863	12	8	7	arrhythmic	11	5	0.00260594	14	13
OG0003853	Lthed_scf0040.1_g035240.1	Qgl_scf0050.1_g102650.1	AT4G00660.2	AT4G00660.2	0.00976341	14	13	4	annual	13	10	0.00351348	23	15	17	arrhythmic	21	11	0.046375	14	13	4	arrhythmic	13	4	0.588929	17	6	1	arrhythmic	16	10	0.170532	23	23	4	arrhythmic	21	7	1.78244e-05	13	13	4	annual	12	10	0.994845	7	5
OG0003854	Lthed_scf0040.1_g037470.1	Qgl_scf0050.1_g099880.1	AT3G61415.1	AT3G61415.1	0.916258	20	7	1	arrhythmic	18	4	0.00842681	14	8	8	annual	13	5	0.232276	23	2	11	arrhythmic	21	6	0.047432	11	1	2	arrhythmic	10	5	0.540057	15	9	3	arrhythmic	14	6	0.00148575	15	4	6	annual	14	1	0.0108372	13	11
OG0003855	Lthed_scf0030.1_g070680.1	Qgl_scf0010.1_g116890.1	AT4G01290.2	AT4G01290.1	0.00158604	16	3	6	annual	15	12	0.00157868	13	3	10	annual	12	12	0.473271	13	10	4	arrhythmic	12	1	0.0616352	13	8	10	arrhythmic	12	12	0.0053458	12	6	1	annual	11	3	1.87187e-07	14	4	6	annual	13	1	0.000313863	14	10
OG0003856	Lthed_scf0030.1_g069750.1	Qgl_scf0010.1_g117550.1	AT5G12370.2	AT5G12370.2	2.05607e-05	12	9	7	annual	11	6	0.0129083	13	12	2	arrhythmic	12	9	0.98222	6	5	3	arrhythmic	6	9	0.00635797	12	11	4	annual	11	2	0.000118649	12	8	9	annual	11	5	4.28335e-06	13	13	3	annual	12	10	0.0102442	14	2
OG0003858	Lthed_scf0030.1_g061450.1	Qgl_scf0010.1_g127980.1	AT2G46225.1	AT2G46225.1	0.00131795	13	9	6	annual	12	6	0.0284485	21	16	10	arrhythmic	19	12	0.983851	7	7	3	arrhythmic	6	11	0.233803	16	8	11	arrhythmic	15	12	0.0944011	6	2	3	arrhythmic	6	11	0.0427011	13	8	1	arrhythmic	12	5	0.0586625	6	2
OG0003859	Lthed_scf0030.1_g062560.1	Qgl_scf0010.1_g126580.1	AT4G01200.1	AT4G01200.1	1	9	1	3	arrhythmic	8	10	0.999966	13	7	6	arrhythmic	12	4	0.999873	9	5	7	arrhythmic	8	9	0.999951	11	11	7	arrhythmic	10	2	0.20131	17	12	10	arrhythmic	16	9	0.354871	6	6	3	arrhythmic	6	3	1.19112e-05	13	3
OG0003860	Lthed_scf0030.1_g058850.1	Qgl_scf0010.1_g130050.1	AT3G61600.2	AT3G61600.2	1.30473e-07	13	4	5	annual	12	1	3.94178e-11	13	4	7	annual	12	1	4.11812e-05	13	10	4	annual	12	1	3.53593e-05	12	11	4	annual	11	2	1.10597e-09	12	4	5	annual	11	1	7.13679e-09	13	3	9	annual	12	12	0.000171813	13	10
OG0003861	Lthed_scf0030.1_g059810.1	Qgl_scf0010.1_g129150.1	AT3G61650.1	AT3G61650.1	0.0470993	10	8	6	arrhythmic	9	5	8.64753e-05	12	12	5	annual	11	9	0.0433004	15	12	14	arrhythmic	14	3	1.8387e-07	12	4	7	annual	11	8	0.104061	6	1	4	arrhythmic	6	10	0.000170971	13	10	7	annual	12	7	0.00220395	7	5
OG0003862	Lthed_scf0030.1_g067110.1	Qgl_scf0010.1_g120560.1	AT2G46370.4	AT2G46370.2	0.414882	6	6	2	arrhythmic	6	3	8.96939e-07	13	10	5	annual	12	7	0.068215	7	4	2	arrhythmic	6	8	0.473045	6	4	4	arrhythmic	6	8	0.0915717	6	5	3	arrhythmic	6	2	0.299389	13	12	2	arrhythmic	12	9	0.0116021	7	3
OG0003863	Lthed_scf0030.1_g056510.1	Qgl_scf0010.1_g132840.1	AT3G61740.2	AT3G61740.2	0.00345636	18	7	4	arrhythmic	17	4	0.598585	13	5	7	arrhythmic	12	2	0.30082	17	1	7	arrhythmic	16	5	0.863484	23	22	16	arrhythmic	21	12	0.343925	6	5	2	arrhythmic	6	2	0.0102627	12	4	3	arrhythmic	11	1	0.0683668	12	12
OG0003864	Lthed_scf0040.1_g041700.1	Qgl_scf0050.1_g095770.1	AT2G46630.1	AT2G46630.1	0.00305527	12	10	5	annual	11	7	6.47522e-05	13	12	4	annual	12	9	4.90217e-06	13	1	9	annual	12	5	0.0668885	6	4	3	arrhythmic	6	8	1.44952e-07	12	8	9	annual	11	5	3.25182e-08	13	9	7	annual	12	6	8.97899e-06	13	13
OG0003867	Lthed_scf0070.1_g090040.1	Qgl_scf0080.1_g083570.1	AT2G43320.2	AT2G43320.2	0.263271	10	2	4	arrhythmic	9	11	0.347726	14	6	7	arrhythmic	13	3	0.0483704	12	12	5	arrhythmic	11	3	1.19678e-06	12	10	8	annual	11	1	0.277831	7	2	4	arrhythmic	6	11	0.853055	8	6	5	arrhythmic	7	3	0.00146876	14	14
OG0003868	Lthed_scf0070.1_g087410.1	Qgl_scf0080.1_g079670.1	AT3G59290.1	AT3G59290.1	0.023387	14	2	9	arrhythmic	13	11	0.00710421	14	2	7	annual	13	11	0.00429446	14	13	4	annual	13	4	0.109706	14	8	11	arrhythmic	13	12	0.0338846	13	2	8	arrhythmic	12	11	0.113113	15	1	2	arrhythmic	14	10	0.0483793	12	8
OG0003871	Lthed_scf0100.1_g043960.1	Qgl_scf0100.1_g063870.1	AT1G04690.1	AT1G04690.1	1.0036e-06	13	9	8	annual	12	6	1.04823e-05	13	12	4	annual	12	9	0.329493	19	13	10	arrhythmic	17	4	0.459052	6	4	3	arrhythmic	6	8	0.000229097	12	7	10	annual	11	4	1.18825e-07	13	10	6	annual	12	7	0.000131309	14	13
OG0003874	Lthed_scf0100.1_g025920.1	Qgl_scf0100.1_g082610.1	AT4G16280.4	AT4G16280.4	0.0753037	17	1	8	arrhythmic	16	10	0.862141	13	8	6	arrhythmic	12	5	0.238418	15	1	7	arrhythmic	14	5	0.119427	23	6	3	arrhythmic	21	10	0.000427116	13	3	9	annual	12	12	0.96914	8	6	3	arrhythmic	7	3	0.986352	9	4
OG0003876	Lthed_scf0100.1_g024670.1	Qgl_scf0100.1_g083470.1	AT3G06650.2	AT3G06650.2	0.335257	7	1	6	arrhythmic	6	10	0.000253369	15	2	6	annual	14	11	0.0724885	14	13	11	arrhythmic	13	4	0.800514	6	4	2	arrhythmic	6	8	0.0344839	6	2	3	arrhythmic	6	11	2.38787e-05	14	11	6	annual	13	8	0.0897617	7	5
OG0003878	Lthed_scf0100.1_g018370.1	Qgl_scf0100.1_g088330.1	AT1G04170.2	AT1G04170.2	0.00201952	12	12	7	annual	11	9	0.155448	14	12	8	arrhythmic	13	9	0.512623	7	2	3	arrhythmic	6	6	0.0676431	12	11	2	arrhythmic	11	2	0.991261	11	8	6	arrhythmic	10	5	1.50589e-05	13	10	5	annual	12	7	6.02608e-06	13	11
OG0003879	Lthed_scf0100.1_g016150.1	Qgl_scf0100.1_g089290.1	AT4G02500.1	AT4G02500.1	9.686e-05	15	9	10	annual	14	6	0.00262135	19	6	10	arrhythmic	17	3	0.00827207	13	1	5	annual	12	5	0.996409	7	1	4	arrhythmic	6	5	0.000775346	14	8	10	annual	13	5	2.09512e-08	15	9	10	annual	14	6	0.000151197	13	1
OG0003880	Lthed_scf0100.1_g012840.1	Qgl_scf0100.1_g092110.1			1.3074e-06	14	3	6	annual	13	12	2.76357e-09	13	4	7	annual	12	1	0.184074	13	10	9	arrhythmic	12	1	0.182739	18	15	7	arrhythmic	17	6	0.00015807	13	4	4	annual	12	1	5.89255e-09	13	4	5	annual	12	1	1.69772e-06	13	10
OG0003882	Lthed_scf0100.1_g007030.1	Qgl_scf0100.1_g098520.1	AT3G06060.1	AT3G06060.2	6.68893e-05	14	3	9	annual	13	12	0.000100341	13	3	7	annual	12	12	0.0153074	7	5	6	arrhythmic	6	9	0.000136902	13	1	7	annual	12	5	0.896552	23	20	9	arrhythmic	21	4	0.495758	9	2	1	arrhythmic	8	11	0.0118789	12	6
OG0003883	Lthed_scf0100.1_g006880.1	Qgl_scf0100.1_g098570.1	AT4G14220.1	AT4G14220.1	0.00875317	12	1	2	annual	11	10	0.00721802	13	13	3	annual	12	10	0.0765362	14	14	1	arrhythmic	13	5	0.0759258	12	4	5	arrhythmic	11	8	0.00609208	11	1	7	annual	10	10	0.0179008	14	1	2	arrhythmic	13	10	0.932691	6	3
OG0003886	Lthed_scf0100.1_g003480.1	Qgl_scf0100.1_g101700.1	AT3G22530.1	AT3G22530.1	0.973449	7	2	4	arrhythmic	6	11	0.00581152	7	4	3	half-annual	6	1	0.830195	12	2	4	arrhythmic	11	6	0.212127	12	10	4	arrhythmic	11	1	0.975959	6	3	5	arrhythmic	6	12	0.226065	17	5	16	arrhythmic	16	2	0.00053958	14	14
OG0003887	Lthed_scf0100.1_g003420.1	Qgl_scf0100.1_g101740.1	AT3G22540.1	AT3G22540.1	1	16	9	4	arrhythmic	15	6	0.00606993	13	11	7	annual	12	8	1	6	3	2	arrhythmic	6	7	1	12	2	8	arrhythmic	11	6	4.40595e-05	13	7	10	annual	12	4	1.22001e-06	13	10	7	annual	12	7	0.221595	8	4
OG0003888	Lthed_scf0070.1_g106280.1	Qgl_scf0080.1_g102560.1	AT5G39740.2	AT5G39740.2	0.000341107	13	1	6	annual	12	10	4.82293e-05	13	1	9	annual	12	10	4.14535e-06	14	5	7	annual	13	9	0.00160094	13	7	5	annual	12	11	0.0762332	12	7	2	arrhythmic	11	4	0.11692	10	8	7	arrhythmic	9	5	6.9083e-05	13	12
OG0003889	Lthed_scf0070.1_g097330.1	Qgl_scf0080.1_g090670.1	AT3G07560.1	AT3G07560.1	0.00184082	18	7	9	arrhythmic	17	4	0.00067265	23	2	19	arrhythmic	21	11	0.105677	14	3	10	arrhythmic	13	7	0.33692	23	11	9	arrhythmic	21	2	0.0156046	6	5	2	arrhythmic	6	2	0.125875	19	3	12	arrhythmic	17	12	0.00634265	14	8
OG0003890	Lthed_scf0100.1_g038530.1	Qgl_scf0100.1_g068340.1	AT4G14300.2	AT2G33410.1	2.91299e-07	13	11	9	annual	12	8	0.000158222	13	9	11	annual	12	6	2.96817e-06	14	5	6	annual	13	9	1.11041e-07	14	3	8	annual	13	7	0.00418256	7	3	3	half-annual	6	12	0.159988	23	4	17	arrhythmic	21	1	7.00326e-06	14	10
OG0003891	Lthed_scf0100.1_g035150.1	Qgl_scf0100.1_g071850.1	AT5G43310.2	AT5G43310.2	0.000181451	14	9	6	annual	13	6	0.981973	9	3	5	arrhythmic	8	12	8.38653e-05	14	13	10	annual	13	4	8.86668e-07	13	3	7	annual	12	7	0.339671	6	4	3	arrhythmic	6	1	0.984464	9	4	3	arrhythmic	8	1	0.00355527	13	2
OG0003898	Lthed_scf0070.1_g110420.1	Qgl_scf0080.1_g104920.1	AT2G31800.1	AT2G31800.1	0.00145766	14	8	12	annual	13	5	0.142832	6	3	3	arrhythmic	6	12	0.22255	13	11	10	arrhythmic	12	2	0.00328132	13	10	2	annual	12	1	0.0547277	13	2	3	arrhythmic	12	11	2.76289e-06	13	1	6	annual	12	10	0.314855	12	3
OG0003901	Lthed_scf0070.1_g115060.1	Qgl_scf0080.1_g109710.1	AT3G59910.2	AT3G59910.2	0.0363501	6	5	4	arrhythmic	6	2	0.00767262	13	3	11	annual	12	12	0.0289178	9	6	5	arrhythmic	8	10	0.556368	11	11	3	arrhythmic	10	2	0.00839261	6	4	4	half-annual	6	1	0.00010257	12	4	4	annual	11	1	0.134932	7	3
OG0003902	Lthed_scf0100.1_g042150.1	Qgl_scf0100.1_g065190.1	AT3G23990.1	AT3G23990.1	0.0651817	12	11	11	arrhythmic	11	8	0.183894	6	6	2	arrhythmic	6	3	0.662104	7	3	2	arrhythmic	6	7	0.0465028	13	11	4	arrhythmic	12	2	0.145655	4	4	1	arrhythmic	4	1	0.0428083	14	11	2	arrhythmic	13	8	0.287413	12	12
OG0003903	Lthed_scf0020.1_g002950.1	Qgl_scf0030.1_g187620.1	AT5G50430.3	AT1G17280.4	0.00148086	17	16	10	annual	16	12	3.15446e-07	14	3	7	annual	13	12	1.1025e-05	13	11	3	annual	12	2	5.14473e-05	13	9	7	annual	12	12	0.00285511	13	4	4	annual	12	1	0.00255095	19	16	11	arrhythmic	17	12	0.380775	7	2
OG0003904	Lthed_scf0020.1_g008350.1	Qgl_scf0030.1_g180620.1	AT3G14110.1	AT3G14110.3	0.113677	6	6	4	arrhythmic	6	3	0.0359406	13	1	8	arrhythmic	12	10	0.00689198	12	3	9	annual	11	7	0.00013112	12	6	4	annual	11	10	0.00652343	12	8	1	annual	11	5	0.108219	13	6	8	arrhythmic	12	3	0.00120567	13	13
OG0003905	Lthed_scf0020.1_g008360.1	Qgl_scf0030.1_g180610.1	AT1G17370.1	AT1G17370.1	0.110545	6	5	4	arrhythmic	6	2	0.000489594	12	2	7	annual	11	11	0.247474	23	17	2	arrhythmic	21	8	0.0243551	6	4	3	arrhythmic	6	8	0.00362355	10	5	4	annual	9	2	0.00152229	13	5	4	annual	12	2	0.752265	14	11
OG0003906	Lthed_scf0020.1_g015800.1	Qgl_scf0030.1_g174310.1	AT3G13990.2	AT3G13990.2	0.000257935	17	1	5	annual	16	10	0.0184213	16	16	7	arrhythmic	15	12	0.00991261	13	8	7	annual	12	12	0.00742779	18	4	6	arrhythmic	17	8	0.0232104	14	1	8	arrhythmic	13	10	0.0186827	15	13	5	arrhythmic	14	10	0.00039762	12	12
OG0003907	Lthed_scf0020.1_g021040.1	Qgl_scf0030.1_g168990.1	AT3G13882.1	AT3G13882.1	0.0168824	15	1	8	arrhythmic	14	10	0.0298857	14	14	9	arrhythmic	13	10	0.986188	17	5	4	arrhythmic	16	9	8.86794e-05	12	4	6	annual	11	8	0.0499735	12	8	2	arrhythmic	11	5	0.00845754	12	8	8	annual	11	5	0.000132168	21	12
OG0003910	Lthed_scf0020.1_g028710.1	Qgl_scf0030.1_g160530.1	AT1G51720.3	AT1G51720.3	0.000196766	12	11	5	annual	11	8	0.00309644	13	12	3	annual	12	9	0.00791555	15	3	5	annual	14	7	8.74905e-06	13	3	7	annual	12	7	0.0012574	14	9	10	annual	13	6	0.00129287	13	12	6	annual	12	9	0.013747	15	2
OG0003912	Lthed_scf0020.1_g044540.1	Qgl_scf0030.1_g138140.1	AT3G16030.1	AT3G16030.2	0.00166023	14	3	5	annual	13	12	0.609954	17	9	7	arrhythmic	16	6	0.0198318	14	2	11	arrhythmic	13	6	0.305105	18	9	4	arrhythmic	17	12	0.821539	13	3	10	arrhythmic	12	12	0.0794287	17	5	13	arrhythmic	16	2	0.227174	13	2
OG0003913	Lthed_scf0020.1_g048270.1	Qgl_scf0030.1_g133820.1	AT3G15990.1	AT3G15990.1	1	19	11	7	arrhythmic	17	8	0.0250949	13	11	5	arrhythmic	12	8	1	7	7	2	arrhythmic	6	11	1	5	4	3	arrhythmic	5	8	2.86838e-05	13	7	10	annual	12	4	0.00987242	6	1	3	half-annual	6	10	1.5954e-05	13	1
OG0003915	Lthed_scf0020.1_g063730.1	Qgl_scf0030.1_g116600.1	AT3G15620.1	AT3G15620.1	0.000175642	20	20	7	arrhythmic	18	4	0.621222	9	8	7	arrhythmic	8	5	0.914206	7	6	6	arrhythmic	6	10	0.00162184	11	5	6	annual	10	9	0.646636	19	2	1	arrhythmic	17	11	3.86473e-08	13	12	5	annual	12	9	0.216944	6	1
OG0003917	Lthed_scf0020.1_g055870.1	Qgl_scf0030.1_g123940.1	AT3G15730.1	AT3G15730.1	0.146695	13	3	10	arrhythmic	12	12	1.90645e-05	13	3	5	annual	12	12	0.0312734	14	13	8	arrhythmic	13	4	0.999504	7	1	4	arrhythmic	6	5	3.68021e-05	13	3	6	annual	12	12	2.45964e-06	13	2	8	annual	12	11	0.940657	7	1
OG0003919	Lthed_scf0020.1_g059120.1	Qgl_scf0030.1_g120980.1	AT1G52540.1	AT1G52540.1	6.80662e-05	13	9	6	annual	12	6	0.128137	12	12	8	arrhythmic	11	9	0.000677908	15	12	13	annual	14	3	0.00101455	23	14	8	arrhythmic	21	5	0.0255923	11	8	9	arrhythmic	10	5	0.000770272	14	11	7	annual	13	8	0.000193591	14	13
OG0003920	Lthed_scf0020.1_g061770.1	Qgl_scf0030.1_g118910.1	AT1G15750.4	AT1G15750.4	1.8831e-06	13	11	7	annual	12	8	4.11112e-07	14	11	8	annual	13	8	0.000247312	13	3	6	annual	12	7	0.0232056	13	3	8	arrhythmic	12	7	0.000581257	12	10	7	annual	11	7	9.92927e-07	12	11	7	annual	11	8	7.02914e-05	14	14
OG0003921	Lthed_scf0020.1_g060120.1	Qgl_scf0030.1_g120110.1	AT1G15780.1	AT1G15790.4	0.865559	7	4	2	arrhythmic	6	1	0.00103861	13	3	10	annual	12	12	0.00108625	15	8	6	annual	14	12	0.0989687	13	9	5	arrhythmic	12	12	0.495083	13	2	11	arrhythmic	12	11	0.0632678	13	2	12	arrhythmic	12	11	0.000109162	23	12
OG0003922	Lthed_scf0020.1_g066510.1	Qgl_scf0030.1_g113700.1	AT1G15880.1	AT1G15880.1	0.608916	10	3	1	arrhythmic	9	12	0.603579	8	3	2	arrhythmic	7	12	0.107972	11	6	4	arrhythmic	10	10	0.991592	23	13	21	arrhythmic	21	4	0.97543	11	2	4	arrhythmic	10	11	0.00774252	12	10	6	annual	11	7	0.095244	12	3
OG0003923	Lthed_scf0020.1_g067290.1	Qgl_scf0030.1_g112630.1	AT4G31880.1	AT1G80810.5	1.30842e-06	13	12	5	annual	12	9	6.81496e-07	13	11	7	annual	12	8	0.00303587	13	3	8	annual	12	7	6.57369e-06	12	5	5	annual	11	9	0.0126996	14	10	9	arrhythmic	13	7	0.00556731	12	1	3	annual	11	10	3.69961e-06	14	3
OG0003924	Lthed_scf0020.1_g072280.1	Qgl_scf0030.1_g109110.1	AT1G80920.1	AT1G80920.1	0.000530332	14	10	5	annual	13	7	0.247675	7	2	6	arrhythmic	6	11	0.119919	13	4	3	arrhythmic	12	8	0.00671569	15	3	4	annual	14	7	0.0326473	12	12	2	arrhythmic	11	9	0.000625306	13	9	10	annual	12	6	0.599102	10	3
OG0003925	Lthed_scf0040.1_g029940.1	Qgl_scf0050.1_g107750.1	AT1G01940.1	AT1G01940.1	0.0117875	11	2	7	arrhythmic	10	11	0.0973215	23	2	21	arrhythmic	21	11	0.929529	16	1	10	arrhythmic	15	5	0.0148643	17	10	2	arrhythmic	16	1	0.0887407	10	2	8	arrhythmic	9	11	0.196638	22	2	18	arrhythmic	20	11	0.767095	9	6
OG0003928	Lthed_scf0040.1_g028710.1	Qgl_scf0050.1_g108730.1	AT2G45290.2	AT2G45290.2	0.00144776	13	6	2	annual	12	3	0.328625	13	13	7	arrhythmic	12	10	0.00134796	14	5	8	annual	13	9	0.00737239	23	21	16	arrhythmic	21	11	4.83613e-05	12	4	8	annual	11	1	0.00572626	13	5	4	annual	12	2	6.74288e-05	13	9
OG0003929	Lthed_scf0040.1_g028450.1	Qgl_scf0050.1_g109140.1	AT3G52180.1	AT3G52180.1	8.39164e-07	14	4	5	annual	13	1	2.71301e-09	14	4	7	annual	13	1	5.53982e-06	13	12	4	annual	12	3	0.00175947	13	7	10	annual	12	11	4.55873e-06	12	4	4	annual	11	1	1.09405e-12	13	4	7	annual	12	1	5.19221e-09	13	10
OG0003930	Lthed_scf0040.1_g026940.1	Qgl_scf0050.1_g110500.1	AT2G39210.1	AT2G39210.1	1.13666e-08	13	4	5	annual	12	1	0.0221298	13	4	8	arrhythmic	12	1	1.80363e-05	14	10	3	annual	13	1	0.000998163	12	9	7	annual	11	12	0.00012872	12	4	4	annual	11	1	0.0275647	12	3	4	arrhythmic	11	12	0.00152049	14	10
OG0003931	Lthed_scf0040.1_g026370.1	Qgl_scf0050.1_g111240.1	AT3G10390.2	AT3G10390.3	0.147773	20	7	9	arrhythmic	18	4	0.0192247	22	5	9	arrhythmic	20	2	0.17319	23	23	7	arrhythmic	21	1	0.00167967	22	1	9	arrhythmic	20	5	0.229648	6	4	3	arrhythmic	6	1	0.000650427	23	4	10	arrhythmic	21	1	0.146298	7	4
OG0003933	Lthed_scf0040.1_g021560.1	Qgl_scf0050.1_g115520.1	AT2G35800.1	AT2G35800.1	1.02583e-06	13	4	5	annual	12	1	0.308006	13	5	6	arrhythmic	12	2	0.00165697	15	4	5	annual	14	8	0.19476	23	20	17	arrhythmic	21	11	0.00448473	12	4	7	annual	11	1	2.59924e-07	13	4	8	annual	12	1	0.0872966	13	10
OG0003934	Lthed_scf0040.1_g021550.1	Qgl_scf0050.1_g115540.1	AT3G52300.1	AT3G52300.1	0.123955	18	8	13	arrhythmic	17	5	0.115167	15	12	7	arrhythmic	14	9	0.0204828	14	13	13	arrhythmic	13	4	0.0315594	23	10	14	arrhythmic	21	1	0.000399444	12	7	11	annual	11	4	5.74934e-08	13	10	8	annual	12	7	0.00761403	14	12
OG0003935	Lthed_scf0040.1_g020400.1	Qgl_scf0050.1_g116910.1	AT2G39290.1	AT2G39290.1	2.56223e-05	13	4	8	annual	12	1	0.000193999	14	2	10	annual	13	11	6.31268e-08	13	9	7	annual	12	1	2.46225e-08	13	9	7	annual	12	12	1.63171e-06	12	3	8	annual	11	12	1.91689e-05	13	4	7	annual	12	1	1.45574e-10	14	9
OG0003936	Lthed_scf0040.1_g020090.1	Qgl_scf0050.1_g117190.1	AT3G53500.2	AT3G53500.2	0.0223859	21	3	17	arrhythmic	19	12	0.0137275	21	2	19	arrhythmic	19	11	0.120089	13	4	8	arrhythmic	12	8	0.00927895	15	2	7	annual	14	6	0.636585	7	3	3	arrhythmic	6	12	0.0980751	7	3	3	arrhythmic	6	12	0.000192036	15	9
OG0003938	Lthed_scf0040.1_g016450.1	Qgl_scf0050.1_g119550.1	AT5G59350.3	AT5G59350.3	2.38525e-05	12	10	6	annual	11	7	0.000398189	12	12	4	annual	11	9	0.0462466	14	13	7	arrhythmic	13	4	0.000219028	13	1	9	annual	12	5	4.32031e-05	13	9	8	annual	12	6	0.0142353	7	7	3	arrhythmic	6	4	0.107978	14	13
OG0003940	Lthed_scf0040.1_g011500.1	Qgl_scf0050.1_g123260.1	AT3G55580.1	AT3G55580.1	0.363235	23	1	7	arrhythmic	21	10	0.91668	3	1	2	arrhythmic	3	10	0.977495	21	1	4	arrhythmic	19	5	0.760483	7	1	6	arrhythmic	6	5	0.00378512	23	23	20	arrhythmic	21	7	0.00757496	18	5	16	arrhythmic	17	2	0.0135159	12	9
OG0003943	Lthed_scf0040.1_g008810.1	Qgl_scf0050.1_g125740.1	AT3G55830.1	AT3G55830.1	0.543032	13	12	6	arrhythmic	12	9	0.988959	22	16	9	arrhythmic	20	12	0.0104053	11	2	6	arrhythmic	10	6	0.00271911	22	13	2	arrhythmic	20	4	0.00419733	12	4	2	annual	11	1	0.0466473	15	14	11	arrhythmic	14	10	0.0783434	14	10
OG0003944	Lthed_scf0040.1_g007370.1	Qgl_scf0050.1_g126580.1	AT2G40070.1	AT2G40070.1	0.0895332	11	1	3	arrhythmic	10	10	0.00416439	14	12	10	annual	13	9	0.00846026	7	6	5	half-annual	6	10	0.00165156	13	1	10	annual	12	5	0.331347	6	1	2	arrhythmic	6	10	0.00158845	13	10	7	annual	12	7	0.129678	16	3
OG0003948	Lthed_scf0040.1_g000660.1	Qgl_scf0050.1_g132530.1	AT3G54190.1	AT3G54190.1	0.000284554	13	4	10	annual	12	1	3.6576e-07	14	2	9	annual	13	11	0.00463345	13	11	4	annual	12	2	1.33284e-06	13	9	8	annual	12	12	6.53963e-06	14	4	6	annual	13	1	0.0195007	15	3	11	arrhythmic	14	12	7.61701e-07	14	11
OG0003949	Lthed_scf0100.1_g104190.1	Qgl_scf0100.1_g000880.1	AT2G17520.1	AT2G17520.1	0.014454	7	3	3	arrhythmic	6	12	0.0222891	13	3	11	arrhythmic	12	12	0.0748002	15	11	10	arrhythmic	14	2	0.791045	9	9	5	arrhythmic	8	12	0.00351897	12	5	2	annual	11	2	4.65671e-09	13	4	6	annual	12	1	0.00904117	14	11
OG0003950	Lthed_scf0100.1_g102740.1	Qgl_scf0100.1_g002490.1	AT3G51390.1	AT3G51390.1	0.00587196	13	9	9	annual	12	6	0.245771	14	1	3	arrhythmic	13	10	0.708778	7	6	4	arrhythmic	6	10	0.000688349	13	2	8	annual	12	6	0.0650775	20	19	7	arrhythmic	18	3	0.194442	14	12	4	arrhythmic	13	9	0.946258	8	3
OG0003952	Lthed_scf0040.1_g014060.1	Qgl_scf0050.1_g121010.1	AT5G27990.2	AT5G27990.2	0.726682	12	1	3	arrhythmic	11	10	0.0336302	14	13	10	arrhythmic	13	10	0.843966	23	7	16	arrhythmic	21	11	0.141962	6	4	3	arrhythmic	6	8	0.057226	13	5	5	arrhythmic	12	2	0.000171198	13	5	6	annual	12	2	0.000726017	14	12
OG0003953	Lthed_scf0010.1_g033140.1	Qgl_scf0020.1_g031900.1	AT5G16970.1	AT5G16970.1	0.132772	13	11	6	arrhythmic	12	8	0.403922	23	10	6	arrhythmic	21	7	0.0133656	13	1	9	arrhythmic	12	5	0.0102224	15	14	8	arrhythmic	14	5	1.79195e-09	12	10	6	annual	11	7	0.384411	13	12	9	arrhythmic	12	9	0.0673536	13	10
OG0003960	Lthed_scf0050.1_g105270.1	Qgl_scf0040.1_g125210.1	AT5G27840.1	AT5G27840.1	2.32306e-05	12	4	4	annual	11	1	0.0266413	13	3	8	arrhythmic	12	12	0.110866	16	8	9	arrhythmic	15	12	0.0104169	11	11	4	arrhythmic	10	2	0.0729756	6	4	3	arrhythmic	6	1	0.0033877	13	9	12	annual	12	6	0.990912	7	2
OG0003964	Lthed_scf0120.1_g056540.1	Qgl_scf0120.1_g050590.1	AT3G62640.1	AT3G62640.1	1	9	1	3	arrhythmic	8	10	0.999996	7	5	4	arrhythmic	6	2	0.999569	21	11	15	arrhythmic	19	2	0.13442	13	11	11	arrhythmic	12	2	0.144171	12	7	10	arrhythmic	11	4	0.297119	14	7	10	arrhythmic	13	4	0.0571197	21	11
OG0003965	Lthed_scf0050.1_g112650.1	Qgl_scf0040.1_g138320.1	AT1G56570.2	AT1G56570.2	0.695681	7	6	3	arrhythmic	6	3	0.987461	7	1	1	arrhythmic	6	10	0.0023286	13	8	8	annual	12	12	0.208707	7	6	4	arrhythmic	6	10	0.448593	11	3	6	arrhythmic	10	12	0.195376	14	6	3	arrhythmic	13	3	0.00628738	14	12
OG0003971	Lthed_scf0100.1_g076640.1	Qgl_scf0100.1_g037830.1	AT5G10520.1	AT5G10520.1	0.0278956	12	3	2	arrhythmic	11	12	0.075682	11	3	5	arrhythmic	10	12	0.143498	12	8	6	arrhythmic	11	12	0.0166615	13	4	7	arrhythmic	12	8	8.99917e-07	12	1	7	annual	11	10	0.00196093	13	1	7	annual	12	10	0.00303523	7	7
OG0003972	Lthed_scf0100.1_g076560.1	Qgl_scf0100.1_g037950.1	AT5G10510.6	AT5G10510.6	1	17	8	14	arrhythmic	16	5	0.814547	4	4	3	arrhythmic	4	1	1	14	13	8	arrhythmic	13	4	1	23	14	18	arrhythmic	21	5	0.0118209	6	1	4	arrhythmic	6	10	8.07557e-05	14	11	4	annual	13	8	0.0037369	13	8
OG0003975	Lthed_scf0050.1_g091790.1	Qgl_scf0040.1_g103170.1	AT5G56750.1	AT5G56750.1	1.28412e-07	13	9	7	annual	12	6	5.10358e-07	12	12	4	annual	11	9	0.00455504	13	1	9	annual	12	5	0.121007	15	14	5	arrhythmic	14	5	4.0947e-05	12	8	9	annual	11	5	2.23115e-10	13	11	5	annual	12	8	2.26795e-05	13	13
OG0003977	Lthed_scf0050.1_g091530.1	Qgl_scf0040.1_g103040.1	AT4G14746.1	AT4G14746.1	0.880134	14	1	7	arrhythmic	13	10	0.145905	15	12	6	arrhythmic	14	9	0.116939	9	1	2	arrhythmic	8	5	0.484658	23	13	3	arrhythmic	21	4	0.308872	12	3	5	arrhythmic	11	12	0.000518315	13	2	9	annual	12	11	0.0253806	7	2
OG0003979	Lthed_scf0050.1_g089580.1	Qgl_scf0040.1_g099790.1	AT5G28840.2	AT5G28840.2	0.00676247	13	5	6	annual	12	2	1.70901e-05	13	5	5	annual	12	2	0.13173	6	3	2	arrhythmic	6	7	0.00584096	13	10	5	annual	12	1	0.0073588	12	9	7	annual	11	6	3.41854e-06	12	8	7	annual	11	5	3.69282e-12	14	13
OG0003981	Lthed_scf0050.1_g084730.1	Qgl_scf0040.1_g093220.1	AT1G54460.1	AT1G54460.1	0.00216943	15	10	6	annual	14	7	0.986451	13	4	6	arrhythmic	12	1	0.00890315	14	12	10	annual	13	3	0.0496402	16	12	11	arrhythmic	15	3	0.000700249	12	9	10	annual	11	6	0.000142306	13	10	9	annual	12	7	0.881718	14	5
OG0003985	Lthed_scf0050.1_g075340.1	Qgl_scf0040.1_g083660.1	AT3G04260.1	AT3G04260.1	1.22327e-06	13	11	6	annual	12	8	0.00437451	13	1	3	annual	12	10	1.01422e-05	13	4	9	annual	12	8	0.00010936	13	5	6	annual	12	9	0.11155	6	6	3	arrhythmic	6	3	0.597328	12	8	1	arrhythmic	11	5	0.346687	23	12
OG0003988	Lthed_scf0060.1_g105400.1	Qgl_scf0090.1_g014040.1	AT1G05840.1	AT1G05840.1	0.0397485	12	10	2	arrhythmic	11	7	0.423268	13	4	6	arrhythmic	12	1	0.00161153	13	10	8	annual	12	1	1.2164e-05	14	10	9	annual	13	1	0.000217569	13	7	11	annual	12	4	0.0104085	13	8	10	arrhythmic	12	5	0.409112	7	1
OG0003991	Lthed_scf0120.1_g085630.1	Qgl_scf0120.1_g075300.1	AT3G63410.1	AT3G63410.1	0.000114283	14	11	6	annual	13	8	1.44757e-05	14	11	6	annual	13	8	0.0314557	13	5	5	arrhythmic	12	9	3.11458e-06	12	5	5	annual	11	9	0.000304992	13	4	5	annual	12	1	0.0644762	12	4	8	arrhythmic	11	1	0.00103973	18	13
OG0003992	Lthed_scf0120.1_g084650.1	Qgl_scf0120.1_g074590.1	AT4G02680.1	AT4G02680.1	0.000688455	6	5	4	half-annual	6	2	0.981721	13	10	6	arrhythmic	12	7	0.01453	13	2	2	arrhythmic	12	6	0.539772	6	4	3	arrhythmic	6	8	0.425617	11	4	4	arrhythmic	10	1	1.98542e-05	14	4	6	annual	13	1	0.103941	13	11
OG0003993	Lthed_scf0120.1_g047470.1	Qgl_scf0120.1_g043180.1	AT3G06190.1	AT3G06190.1	0.00461207	13	8	9	annual	12	5	0.275028	23	21	5	arrhythmic	21	5	5.53123e-05	13	13	9	annual	12	4	0.00151421	13	9	11	annual	12	12	0.0384997	6	1	3	arrhythmic	6	10	5.79776e-07	14	10	8	annual	13	7	0.00291914	10	5
OG0003995	Lthed_scf0120.1_g048110.1	Qgl_scf0120.1_g044000.1	AT3G29350.1	AT1G03430.1	0.101691	11	1	7	arrhythmic	10	10	0.0235745	13	10	8	arrhythmic	12	7	0.0784571	13	5	2	arrhythmic	12	9	0.0131258	12	6	2	arrhythmic	11	10	4.1387e-06	12	4	5	annual	11	1	0.010275	7	3	3	arrhythmic	6	12	0.347224	14	3
OG0003998	Lthed_scf0120.1_g051070.1	Qgl_scf0120.1_g046070.1	AT1G03010.1	AT1G03010.1	0.507858	6	4	3	arrhythmic	6	1	0.585376	4	4	2	arrhythmic	4	1	0.000644538	13	1	8	annual	12	5	0.0898787	19	15	7	arrhythmic	17	6	2.01755e-10	13	8	7	annual	12	5	1.89872e-05	13	12	3	annual	12	9	2.68286e-08	14	13
OG0003999	Lthed_scf0120.1_g061380.1	Qgl_scf0120.1_g055090.1	AT3G62770.1	AT3G62770.1	0.000231396	18	16	11	arrhythmic	17	12	0.00470115	23	20	4	arrhythmic	21	4	0.960483	7	5	1	arrhythmic	6	9	0.240869	23	22	15	arrhythmic	21	12	0.0883568	12	6	1	arrhythmic	11	3	0.00365088	13	4	4	annual	12	1	0.0297146	13	2
OG0004003	Lthed_scf0120.1_g037710.1	Qgl_scf0120.1_g033840.1	AT4G01250.1	AT4G01250.1	0.476859	7	4	4	arrhythmic	6	1	0.00206407	6	3	4	half-annual	6	12	0.355107	11	4	2	arrhythmic	10	8	3.63056e-06	14	3	6	annual	13	7	1.81224e-05	6	4	4	half-annual	6	1	0.00145409	14	4	7	annual	13	1	0.0100052	7	3
OG0004005	Lthed_scf0120.1_g070290.1	Qgl_scf0120.1_g062360.1	AT3G62160.1	AT3G62160.1	0.954591	13	9	8	arrhythmic	12	6	0.0034136	14	9	8	annual	13	6	4.73523e-06	13	1	8	annual	12	5	0.0251983	13	4	7	arrhythmic	12	8	9.40278e-10	13	9	8	annual	12	6	0.000112962	12	1	3	annual	11	10	6.7373e-07	13	1
OG0004006	Lthed_scf0090.1_g071620.1	Qgl_scf0060.1_g039960.1	AT3G62040.1	AT3G62040.1	0.0102723	7	4	4	arrhythmic	6	1	0.258484	10	9	4	arrhythmic	9	6	0.00179582	14	2	11	annual	13	6	0.00116747	6	5	3	half-annual	6	9	0.321925	14	7	6	arrhythmic	13	4	0.093826	13	7	3	arrhythmic	12	4	1.1075e-08	13	3
OG0004007	Lthed_scf0010.1_g166730.1	Qgl_scf0020.1_g144870.1	AT1G21065.1	AT1G21065.1	0.000584219	21	18	12	arrhythmic	19	2	0.974563	3	1	2	arrhythmic	3	10	0.00759251	14	3	6	annual	13	7	0.0279036	14	2	8	arrhythmic	13	6	0.00349545	14	3	9	annual	13	12	0.239674	23	18	9	arrhythmic	21	2	0.0295141	15	10
OG0004008	Lthed_scf0010.1_g172870.1	Qgl_scf0020.1_g169110.1	AT1G76130.2	AT1G76130.2	0.181712	13	1	2	arrhythmic	12	10	0.107333	16	10	11	arrhythmic	15	7	0.836561	14	14	13	arrhythmic	13	5	0.000137967	13	9	5	annual	12	12	1.80854e-06	12	10	7	annual	11	7	0.0884426	6	1	3	arrhythmic	6	10	0.325612	14	8
OG0004010	Lthed_scf0010.1_g180160.1	Qgl_scf0020.1_g174570.1	AT3G54350.5	AT3G54350.5	0.919421	6	2	1	arrhythmic	6	11	0.0529275	14	2	7	arrhythmic	13	11	0.569109	19	2	10	arrhythmic	17	6	0.112692	14	10	5	arrhythmic	13	1	0.975284	4	2	3	arrhythmic	4	11	0.787866	11	8	5	arrhythmic	10	5	0.249113	18	3
OG0004013	Lthed_scf0010.1_g135930.1	Qgl_scf0020.1_g127620.1	AT5G21140.1	AT5G21140.1	5.71913e-08	13	4	7	annual	12	1	2.11048e-09	13	4	7	annual	12	1	1.74019e-05	13	9	9	annual	12	1	0.000295505	12	12	4	annual	11	3	0.0149048	13	7	2	arrhythmic	12	4	0.0277772	12	8	4	arrhythmic	11	5	0.992923	7	5
OG0004014	Lthed_scf0010.1_g136230.1	Qgl_scf0020.1_g128140.1	AT1G76850.1	AT1G76850.1	0.325971	7	2	3	arrhythmic	6	11	0.908223	4	1	2	arrhythmic	4	10	0.0116827	17	17	4	arrhythmic	16	8	0.130132	12	2	10	arrhythmic	11	6	0.963021	10	10	5	arrhythmic	9	7	0.100672	13	1	1	arrhythmic	12	10	1.41482e-06	14	14
OG0004015	Lthed_scf0120.1_g080070.1	Qgl_scf0120.1_g071050.1	AT3G28670.3	AT3G28670.3	0.288408	3	2	2	arrhythmic	3	11	0.00556288	14	3	8	annual	13	12	0.964688	7	3	2	arrhythmic	6	7	0.256264	22	9	16	arrhythmic	20	12	0.0013673	12	4	7	annual	11	1	0.0147779	13	4	9	arrhythmic	12	1	0.00524441	21	12
OG0004016	Lthed_scf0090.1_g029280.1	Qgl_scf0060.1_g080930.1	AT4G24560.1	AT4G24560.1	0.977546	7	6	4	arrhythmic	6	3	0.000137974	13	7	9	annual	12	4	0.0200012	15	12	13	arrhythmic	14	3	0.817422	12	2	5	arrhythmic	11	6	0.878174	23	20	10	arrhythmic	21	4	0.171988	15	1	8	arrhythmic	14	10	0.0368922	14	13
OG0004017	Lthed_scf0090.1_g027940.1	Qgl_scf0060.1_g081910.1	AT1G28210.2	AT1G28210.2	0.00527424	12	11	5	annual	11	8	1.07087e-05	12	12	7	annual	11	9	0.899636	7	3	2	arrhythmic	6	7	0.00989634	11	5	6	annual	10	9	0.163593	11	1	3	arrhythmic	10	10	5.26943e-05	14	11	5	annual	13	8	0.169322	13	12
OG0004018	Lthed_scf0090.1_g096390.1	Qgl_scf0060.1_g083000.1		AT4G07990.1	1	2	1	1	arrhythmic	2	10	1	23	2	15	arrhythmic	21	11	0.0192474	12	5	8	arrhythmic	11	9	0.00089183	12	9	6	annual	11	12	1	2	2	1	arrhythmic	2	11	1	10	7	7	arrhythmic	9	4	0.000230779	13	10
OG0004020	Lthed_scf0120.1_g075230.1	Qgl_scf0120.1_g067370.1	AT1G27450.1	AT1G27450.1	0.361893	14	1	2	arrhythmic	13	10	0.0010435	12	2	4	annual	11	11	3.72549e-07	14	9	8	annual	13	1	0.00131382	12	4	8	annual	11	8	0.0014183	12	7	9	annual	11	4	7.68687e-10	13	10	7	annual	12	7	0.175373	22	15
OG0004021	Lthed_scf0120.1_g074300.1	Qgl_scf0120.1_g066790.1	AT1G78290.3	AT1G78290.3	0.0754317	22	12	17	arrhythmic	20	9	0.0388038	7	3	5	arrhythmic	6	12	0.0476317	17	10	9	arrhythmic	16	1	0.000377314	12	9	7	annual	11	12	0.0102396	11	11	6	arrhythmic	10	8	0.000656362	13	12	5	annual	12	9	0.245705	7	1
OG0004022	Lthed_scf0120.1_g073990.1	Qgl_scf0120.1_g066680.1	AT4G08960.1	AT4G08960.1	0.0271337	13	13	4	arrhythmic	12	10	0.2283	13	10	7	arrhythmic	12	7	0.000269225	12	10	6	annual	11	1	0.00450844	13	9	10	annual	12	12	0.708676	6	5	3	arrhythmic	6	2	0.0331557	13	5	6	arrhythmic	12	2	0.215837	7	3
OG0004025	Lthed_scf0090.1_g049960.1	Qgl_scf0060.1_g063660.1	AT5G61670.2	AT5G61670.2	0.0837375	13	11	6	arrhythmic	12	8	0.0382365	12	9	8	arrhythmic	11	6	2.0074e-05	13	4	5	annual	12	8	0.0017213	12	5	5	annual	11	9	0.0345637	6	5	3	arrhythmic	6	2	0.0350233	13	5	3	arrhythmic	12	2	0.0385071	14	3
OG0004026	Lthed_scf0090.1_g052630.1	Qgl_scf0060.1_g061590.1	AT5G61530.1	AT5G61530.1	0.0904026	23	16	16	arrhythmic	21	12	0.0268594	12	10	2	arrhythmic	11	7	0.875535	14	12	1	arrhythmic	13	3	0.0288655	18	12	2	arrhythmic	17	3	0.825005	6	4	4	arrhythmic	6	1	0.54102	9	4	7	arrhythmic	8	1	0.00771021	14	3
OG0004027	Lthed_scf0010.1_g016850.1	Qgl_scf0020.1_g017000.1	AT4G28020.1	AT4G28020.1	0.146676	11	4	7	arrhythmic	10	1	1.01114e-05	13	4	8	annual	12	1	0.354465	15	9	9	arrhythmic	14	1	0.0111402	21	9	17	arrhythmic	19	12	0.000770356	12	4	4	annual	11	1	1.85969e-06	13	3	9	annual	12	12	6.42806e-05	13	10
OG0004029	Lthed_scf0010.1_g012650.1	Qgl_scf0020.1_g013330.1	AT5G38240.3	AT5G38250.1	0.934322	9	7	2	arrhythmic	8	4	0.00467009	11	9	4	annual	10	6	0.0640784	23	3	19	arrhythmic	21	7	0.00342665	11	1	6	annual	10	5	0.121439	18	7	10	arrhythmic	17	4	0.0919111	16	6	14	arrhythmic	15	3	0.00134493	12	4
OG0004030	Lthed_scf0010.1_g012360.1	Qgl_scf0020.1_g013190.1	AT2G18910.1	AT2G18910.1	0.0722265	20	1	2	arrhythmic	18	10	0.000113752	23	13	19	arrhythmic	21	10	0.222168	6	1	3	arrhythmic	6	5	0.245737	12	2	8	arrhythmic	11	6	0.0738827	7	6	4	arrhythmic	6	3	0.035908	6	1	3	arrhythmic	6	10	0.0555893	15	13
OG0004031	Lthed_scf0010.1_g012280.1	Qgl_scf0020.1_g013080.1	AT2G18950.1	AT2G18950.1	8.24691e-10	13	12	7	annual	12	9	0.00645714	13	12	3	annual	12	9	0.152992	22	14	19	arrhythmic	20	5	3.633e-05	12	4	6	annual	11	8	0.0761133	12	1	3	arrhythmic	11	10	5.07261e-05	12	12	4	annual	11	9	1.34229e-08	14	3
OG0004032	Lthed_scf0010.1_g116300.1	Qgl_scf0020.1_g101200.1	AT2G19160.2	AT2G19160.2	0.318061	7	2	3	arrhythmic	6	11	0.210243	4	4	2	arrhythmic	4	1	0.0581591	13	10	10	arrhythmic	12	1	0.000491272	13	9	9	annual	12	12	0.176063	6	2	3	arrhythmic	6	11	0.634307	13	11	8	arrhythmic	12	8	3.3046e-05	14	10
OG0004033	Lthed_scf0010.1_g116090.1	Qgl_scf0020.1_g101260.1			0.244044	14	12	6	arrhythmic	13	9	0.000382915	13	9	7	annual	12	6	0.00826553	14	2	7	annual	13	6	0.000157444	13	3	7	annual	12	7	0.130168	18	7	8	arrhythmic	17	4	0.119717	13	13	3	arrhythmic	12	10	1.30087e-07	14	2
OG0004035	Lthed_scf0010.1_g076680.1	Qgl_scf0020.1_g074420.1	AT5G57100.2	AT5G57100.1	0.0542412	7	2	3	arrhythmic	6	11	0.000483845	14	2	3	annual	13	11	0.0215351	13	9	9	arrhythmic	12	1	0.00966982	13	9	1	annual	12	12	0.0010561	13	2	2	annual	12	11	0.0066042	14	2	1	annual	13	11	0.780499	14	10
OG0004039	Lthed_scf0120.1_g082250.1	Qgl_scf0120.1_g072810.1	AT2G25760.1	AT2G25760.1	0.703286	6	6	3	arrhythmic	6	3	1.46277e-08	14	5	7	annual	13	2	0.00262598	12	12	3	annual	11	3	0.033005	11	1	6	arrhythmic	10	5	0.0125751	10	4	5	arrhythmic	9	1	0.396051	11	5	3	arrhythmic	10	2	0.0844364	12	11
OG0004040	Lthed_scf0120.1_g054610.1	Qgl_scf0120.1_g049100.1	AT5G25590.1	AT5G25590.1	0.0196098	14	8	10	arrhythmic	13	5	1.22557e-07	13	11	7	annual	12	8	0.000173517	14	13	11	annual	13	4	0.0295869	16	14	11	arrhythmic	15	5	0.0448224	11	8	8	arrhythmic	10	5	5.65184e-08	13	10	6	annual	12	7	0.0106248	7	5
OG0004042	Lthed_scf0120.1_g052970.1	Qgl_scf0120.1_g047580.1	AT5G24890.1	AT5G24890.1	0.106005	13	11	9	arrhythmic	12	8	0.00719443	7	2	3	half-annual	6	11	0.045671	13	3	11	arrhythmic	12	7	0.350016	7	3	2	arrhythmic	6	7	0.016001	10	5	3	arrhythmic	9	2	0.037811	12	4	4	arrhythmic	11	1	0.00448521	7	3
OG0004046	Lthed_scf0120.1_g064560.1	Qgl_scf0120.1_g057250.1	AT4G32620.1	AT4G32620.1	0.0534256	23	16	18	arrhythmic	21	12	0.0223902	14	5	4	arrhythmic	13	2	0.00146414	12	9	6	annual	11	1	0.140274	13	9	7	arrhythmic	12	12	0.160313	12	4	3	arrhythmic	11	1	1.03718e-08	13	3	7	annual	12	12	1.894e-05	12	10
OG0004047	Lthed_scf0120.1_g064670.1	Qgl_scf0120.1_g057320.1	AT3G24350.1	AT3G24350.1	0.0382734	11	9	5	arrhythmic	10	6	0.315459	14	2	7	arrhythmic	13	11	0.0064	13	1	4	annual	12	5	0.0519547	13	9	9	arrhythmic	12	12	0.00176759	6	2	3	half-annual	6	11	0.024288	19	17	5	arrhythmic	17	1	0.0497841	14	13
OG0004052	Lthed_scf0010.1_g161420.1	Qgl_scf0020.1_g148920.1	AT4G31750.3	AT4G31750.3	0.0275693	23	6	2	arrhythmic	21	3	0.00131084	12	5	6	annual	11	2	0.000821693	13	9	9	annual	12	1	0.0032683	12	10	7	annual	11	1	0.23866	13	2	8	arrhythmic	12	11	0.311151	12	5	3	arrhythmic	11	2	0.00582811	15	9
OG0004055	Lthed_scf0010.1_g068580.1	Qgl_scf0020.1_g066360.1	AT5G13430.1	AT5G13430.1	1.99081e-06	15	1	8	annual	14	10	0.00585153	13	4	6	annual	12	1	3.2522e-05	13	8	9	annual	12	12	0.00232623	12	10	4	annual	11	1	0.000188163	12	5	4	annual	11	2	0.139438	18	17	7	arrhythmic	17	1	0.00448202	13	11
OG0004056	Lthed_scf0010.1_g067320.1	Qgl_scf0020.1_g065290.1	AT3G26744.4	AT3G26744.4	2.10149e-06	14	4	6	annual	13	1	0.101386	13	5	8	arrhythmic	12	2	4.52348e-05	13	10	7	annual	12	1	0.00300555	12	10	8	annual	11	1	0.106325	13	1	10	arrhythmic	12	10	0.195683	8	3	2	arrhythmic	7	12	0.000175668	13	9
OG0004057	Lthed_scf0010.1_g065910.1	Qgl_scf0020.1_g064060.1	AT5G41070.1	AT5G41070.1	1	14	8	8	arrhythmic	13	5	1	12	12	4	arrhythmic	11	9	1	15	15	4	arrhythmic	14	6	0.999951	8	7	3	arrhythmic	7	11	0.0041079	6	6	5	half-annual	6	3	0.000749714	13	10	6	annual	12	7	0.000835037	13	6
OG0004059	Lthed_scf0010.1_g090330.1	Qgl_scf0020.1_g086920.1	AT3G02680.1	AT3G02680.1	0.00436775	17	17	7	annual	16	1	0.0368663	6	4	2	arrhythmic	6	1	0.232014	23	21	9	arrhythmic	21	12	0.134161	14	7	1	arrhythmic	13	11	0.0169679	14	4	4	arrhythmic	13	1	1.67477e-05	15	3	6	annual	14	12	0.746038	23	21
OG0004060	Lthed_scf0090.1_g000580.1	Qgl_scf0060.1_g116820.1	AT1G33360.1	AT1G33360.1	0.00966095	13	6	8	annual	12	3	0.00608042	21	3	12	arrhythmic	19	12	6.74377e-05	15	12	8	annual	14	3	0.000382754	15	15	1	annual	14	6	0.535903	6	3	3	arrhythmic	6	12	0.256921	21	1	18	arrhythmic	19	10	0.127116	13	13
OG0004061	Lthed_scf0090.1_g000620.1	Qgl_scf0060.1_g116790.1	AT4G10250.1	AT4G10250.1	0.272686	6	6	2	arrhythmic	6	3	0.0442342	7	3	4	arrhythmic	6	12	0.999661	15	3	1	arrhythmic	14	7	0.0168279	12	11	8	arrhythmic	11	2	2.2659e-06	6	5	2	half-annual	6	2	0.172255	7	3	3	arrhythmic	6	12	0.984464	7	3
OG0004062	Lthed_scf0090.1_g000650.1	Qgl_scf0060.1_g116750.1	AT1G33330.3	AT1G33330.3	0.00156813	13	12	4	annual	12	9	3.47258e-05	14	9	7	annual	13	6	0.0361456	14	1	12	arrhythmic	13	5	7.25685e-05	11	5	6	annual	10	9	2.81941e-05	6	5	3	half-annual	6	2	0.156672	15	3	9	arrhythmic	14	12	0.987441	14	3
OG0004063	Lthed_scf0090.1_g001010.1	Qgl_scf0060.1_g116510.1	AT1G33470.2	AT1G33470.2	0.0766318	15	8	4	arrhythmic	14	5	0.15613	20	4	13	arrhythmic	18	1	0.165089	14	13	8	arrhythmic	13	4	0.0520394	11	3	8	arrhythmic	10	7	0.000752571	12	9	7	annual	11	6	4.14782e-05	17	8	8	annual	16	5	0.595722	7	7
OG0004064	Lthed_scf0090.1_g001930.1	Qgl_scf0060.1_g115140.1	AT4G10080.1	AT4G10080.1	7.10184e-06	13	10	9	annual	12	7	0.00034612	15	10	7	annual	14	7	0.0811847	11	4	7	arrhythmic	10	8	1.19658e-05	14	3	6	annual	13	7	0.00306055	11	10	9	annual	10	7	0.00711224	23	1	19	arrhythmic	21	10	0.0163688	16	1
OG0004065	Lthed_scf0090.1_g005520.1	Qgl_scf0060.1_g110550.1	AT1G71691.2	AT1G71691.2	1	15	5	10	arrhythmic	14	2	1	4	4	2	arrhythmic	4	1	1	2	1	1	arrhythmic	2	5	1	2	2	1	arrhythmic	2	6	6.79709e-05	6	1	2	half-annual	6	10	0.000941314	13	10	8	annual	12	7	0.0391396	7	5
OG0004066	Lthed_scf0050.1_g121500.1	Qgl_scf0040.1_g151400.1	AT5G03560.4	AT5G03560.4	0.00488972	6	1	3	half-annual	6	10	2.85379e-06	12	12	4	annual	11	9	0.000894359	13	5	6	annual	12	9	0.00355075	12	4	6	annual	11	8	0.0143873	6	6	3	arrhythmic	6	3	6.43006e-08	13	11	5	annual	12	8	0.02478	15	2
OG0004067	Lthed_scf0010.1_g045020.1	Qgl_scf0020.1_g043720.1	AT5G15070.5	AT5G15070.5	0.000112082	12	4	7	annual	11	1	7.10935e-06	13	6	5	annual	12	3	0.00877953	15	8	9	annual	14	12	0.0193331	16	6	4	arrhythmic	15	10	0.000870994	12	4	7	annual	11	1	0.473031	12	4	10	arrhythmic	11	1	3.91999e-05	14	9
OG0004069	Lthed_scf0010.1_g047070.1	Qgl_scf0020.1_g044990.1	AT3G28480.1	AT3G28480.1	0.0622941	7	2	4	arrhythmic	6	11	0.000297439	13	12	7	annual	12	9	0.435142	6	1	4	arrhythmic	6	5	0.182539	12	7	2	arrhythmic	11	11	0.000626936	12	12	6	annual	11	9	3.78907e-07	13	10	8	annual	12	7	0.00181488	13	1
OG0004070	Lthed_scf0010.1_g047660.1	Qgl_scf0020.1_g045840.1	AT3G28345.1	AT3G28345.1	0.660203	13	10	12	arrhythmic	12	7	0.130791	14	11	6	arrhythmic	13	8	0.0742127	13	3	7	arrhythmic	12	7	0.00128696	14	2	8	annual	13	6	7.92846e-10	13	9	8	annual	12	6	1.38021e-06	6	1	3	half-annual	6	10	1.05179e-06	13	1
OG0004071	Lthed_scf0010.1_g052880.1	Qgl_scf0020.1_g051900.1	AT5G14780.1	AT5G14780.1	0.000408255	13	7	1	annual	12	4	1.71466e-05	14	3	8	annual	13	12	0.981121	11	8	5	arrhythmic	10	12	0.811186	6	5	3	arrhythmic	6	9	0.00390923	11	5	7	annual	10	2	7.97794e-05	12	6	7	annual	11	3	0.00373025	15	8
OG0004073	Lthed_scf0010.1_g058840.1	Qgl_scf0020.1_g058730.1	AT4G24770.2	AT4G24770.2	0.248503	13	13	8	arrhythmic	12	10	0.0470229	18	8	9	arrhythmic	17	5	0.00318452	14	6	7	annual	13	10	3.11914e-05	11	7	5	annual	10	11	0.940574	16	1	8	arrhythmic	15	10	0.177029	23	8	4	arrhythmic	21	5	2.62643e-07	13	10
OG0004074	Lthed_scf0010.1_g060830.1	Qgl_scf0020.1_g059900.1	AT5G40760.2	AT5G40760.2	0.000475553	6	4	3	half-annual	6	1	1.76586e-06	13	4	6	annual	12	1	0.0381253	14	8	12	arrhythmic	13	12	0.000779859	14	9	8	annual	13	12	0.0419848	12	4	2	arrhythmic	11	1	0.000118434	14	2	7	annual	13	11	3.38963e-05	14	8
OG0004075	Lthed_scf0010.1_g061170.1	Qgl_scf0020.1_g060310.1	AT5G14285.1	AT5G14285.1	0.000756693	13	9	7	annual	12	6	0.246784	23	12	20	arrhythmic	21	9	0.0448578	7	7	4	arrhythmic	6	11	0.0219547	13	1	9	arrhythmic	12	5	0.0213268	6	1	4	arrhythmic	6	10	0.195701	14	10	8	arrhythmic	13	7	0.00436781	7	6
OG0004076	Lthed_scf0010.1_g061310.1	Qgl_scf0020.1_g060410.1	AT5G40810.1	AT5G40810.1	0.051527	12	12	7	arrhythmic	11	9	0.2325	9	8	4	arrhythmic	8	5	0.00137045	14	13	13	annual	13	4	0.924797	6	4	3	arrhythmic	6	8	0.328973	12	7	7	arrhythmic	11	4	2.13833e-05	13	10	6	annual	12	7	0.0323753	17	12
OG0004077	Lthed_scf0010.1_g062840.1	Qgl_scf0020.1_g061960.1	AT3G01860.2	AT3G01860.2	0.00817335	13	3	6	annual	12	12	0.0697262	13	3	10	arrhythmic	12	12	0.000720387	13	9	4	annual	12	1	9.45391e-07	13	10	2	annual	12	1	0.00020877	12	3	5	annual	11	12	5.51792e-08	13	3	7	annual	12	12	0.00287092	14	10
OG0004078	Lthed_scf0010.1_g062850.1	Qgl_scf0020.1_g061990.1	AT5G14180.1	AT5G14180.1	1	16	9	7	arrhythmic	15	6	5.88458e-05	15	9	8	annual	14	6	1	14	13	11	arrhythmic	13	4	0.237048	12	11	6	arrhythmic	11	2	0.00947563	12	7	9	annual	11	4	1.02429e-07	13	9	8	annual	12	6	0.00968685	10	6
OG0004079	Lthed_scf0010.1_g062900.1	Qgl_scf0020.1_g062090.1	AT3G27170.1	AT3G27170.1	8.08222e-06	13	4	8	annual	12	1	0.142231	13	4	6	arrhythmic	12	1	2.30386e-06	12	11	5	annual	11	2	0.00280444	13	12	2	annual	12	3	1.45435e-07	12	4	7	annual	11	1	0.624188	19	19	5	arrhythmic	17	3	2.32814e-05	12	11
OG0004080	Lthed_scf0010.1_g098250.1	Qgl_scf0020.1_g093910.1	AT3G02280.3	AT3G02280.3	0.0893206	12	11	9	arrhythmic	11	8	0.000152195	7	4	3	half-annual	6	1	0.759483	10	4	5	arrhythmic	9	8	0.0369981	17	6	12	arrhythmic	16	10	0.303167	10	3	5	arrhythmic	9	12	6.3072e-05	12	11	8	annual	11	8	0.12097	14	11
OG0004081	Lthed_scf0010.1_g096910.1	Qgl_scf0020.1_g093080.1	AT5G15270.3	AT5G15270.3	0.000624484	14	4	5	annual	13	1	0.00466672	12	3	9	annual	11	12	0.00964377	13	7	7	annual	12	11	0.376785	6	1	3	arrhythmic	6	5	1.35943e-06	12	4	7	annual	11	1	0.00363086	15	3	6	annual	14	12	0.000218035	12	11
OG0004084	Lthed_scf0010.1_g079320.1	Qgl_scf0020.1_g076730.1	AT5G11390.1	AT5G11390.1	8.27991e-05	12	3	6	annual	11	12	0.0240314	6	3	3	arrhythmic	6	12	0.123864	22	5	20	arrhythmic	20	9	0.0140393	18	1	7	arrhythmic	17	5	0.00431633	12	4	4	annual	11	1	9.48079e-07	13	4	6	annual	12	1	0.972619	7	3
OG0004085	Lthed_scf0010.1_g075390.1	Qgl_scf0020.1_g073220.1	AT5G15790.4	AT5G15790.4	0.10371	11	10	9	arrhythmic	10	7	0.269907	12	9	5	arrhythmic	11	6	0.148706	14	3	5	arrhythmic	13	7	0.988484	6	3	5	arrhythmic	6	7	0.0520571	6	4	3	arrhythmic	6	1	0.0148396	13	3	7	arrhythmic	12	12	0.135175	7	2
OG0004087	Lthed_scf0110.1_g011360.1	Qgl_scf0110.1_g074680.1	AT2G41490.1	AT2G41490.1	0.139107	12	1	2	arrhythmic	11	10	0.122021	7	7	4	arrhythmic	6	4	0.981092	7	1	3	arrhythmic	6	5	0.0102254	12	4	8	arrhythmic	11	8	0.347973	11	11	4	arrhythmic	10	8	0.100114	11	1	4	arrhythmic	10	10	0.549563	17	3
OG0004090	Lthed_scf0010.1_g072040.1	Qgl_scf0020.1_g069050.1	AT1G13740.1	AT1G13740.1	0.178564	9	7	5	arrhythmic	8	4	0.850975	14	2	7	arrhythmic	13	11	0.0457809	7	7	5	arrhythmic	6	11	0.0920184	6	2	3	arrhythmic	6	6	0.22568	6	3	4	arrhythmic	6	12	0.126535	22	2	5	arrhythmic	20	11	0.0131353	14	3
OG0004091	Lthed_scf0010.1_g071910.1	Qgl_scf0020.1_g069000.1	AT3G02110.1	AT3G02110.1	0.961068	7	3	3	arrhythmic	6	12	1.98036e-06	13	12	8	annual	12	9	0.0318088	15	4	10	arrhythmic	14	8	0.0037195	11	7	4	annual	10	11	0.220882	6	1	5	arrhythmic	6	10	0.210243	4	4	2	arrhythmic	4	1	0.00386887	12	7
OG0004092	Lthed_scf0010.1_g127400.1	Qgl_scf0020.1_g118250.1	AT5G15470.1	AT5G15470.1	0.209029	13	2	11	arrhythmic	12	11	2.02075e-05	13	4	6	annual	12	1	0.000178723	13	9	9	annual	12	1	8.88105e-07	13	9	9	annual	12	12	0.0485256	13	2	10	arrhythmic	12	11	1.4118e-06	14	2	8	annual	13	11	0.00751072	14	10
OG0004093	Lthed_scf0010.1_g127540.1	Qgl_scf0020.1_g118440.1	AT5G39360.1	AT5G39360.1	0.316353	22	2	18	arrhythmic	20	11	0.0786708	23	2	19	arrhythmic	21	11	0.00287615	14	10	3	annual	13	1	0.0229112	12	10	4	arrhythmic	11	1	0.3836	13	4	2	arrhythmic	12	1	0.00244032	23	2	19	arrhythmic	21	11	0.00067506	14	11
OG0004094	Lthed_scf0090.1_g010120.1	Qgl_scf0060.1_g107830.1	AT5G07670.1	AT5G07670.1	4.25007e-06	13	13	3	annual	12	10	3.49741e-06	13	13	3	annual	12	10	0.0677266	14	1	13	arrhythmic	13	5	0.0531436	18	16	17	arrhythmic	17	7	0.982274	3	2	1	arrhythmic	3	11	0.846872	12	5	4	arrhythmic	11	2	0.511275	4	4
OG0004095	Lthed_scf0090.1_g010750.1	Qgl_scf0060.1_g106930.1	AT5G51410.5	AT5G51410.5	0.398408	3	3	1	arrhythmic	3	12	0.0504114	14	2	13	arrhythmic	13	11	0.670085	11	9	6	arrhythmic	10	1	0.816362	13	8	2	arrhythmic	12	12	0.766787	11	5	7	arrhythmic	10	2	0.895043	6	4	2	arrhythmic	6	1	0.448073	4	1
OG0004098	Lthed_scf0090.1_g026470.1	Qgl_scf0060.1_g086700.1	AT1G55630.1	AT1G55630.1	0.0422729	19	11	5	arrhythmic	17	8	0.763549	16	11	9	arrhythmic	15	8	0.506322	11	8	7	arrhythmic	10	12	0.550637	13	8	1	arrhythmic	12	12	0.160755	11	4	3	arrhythmic	10	1	0.266839	13	4	9	arrhythmic	12	1	0.323271	12	12
OG0004105	Lthed_scf0100.1_g064340.1	Qgl_scf0100.1_g048960.1	AT5G09840.1	AT5G09840.1	0.0325464	13	3	7	arrhythmic	12	12	0.00994444	14	2	6	annual	13	11	0.95248	5	2	1	arrhythmic	5	6	0.00529269	17	6	6	annual	16	10	0.000283761	13	6	3	annual	12	3	0.00343988	11	8	4	annual	10	5	0.051254	14	12
OG0004107	Lthed_scf0100.1_g065610.1	Qgl_scf0100.1_g048140.1	AT5G09900.2	AT5G09900.2	0.168543	12	8	3	arrhythmic	11	5	3.1495e-06	13	4	6	annual	12	1	0.006714	13	11	5	annual	12	2	0.0616661	23	13	12	arrhythmic	21	4	0.000762084	6	2	3	half-annual	6	11	0.0568004	11	8	7	arrhythmic	10	5	0.0169044	11	2
OG0004108	Lthed_scf0100.1_g066250.1	Qgl_scf0100.1_g047700.1	AT4G12040.2	AT4G12040.2	0.0594289	13	7	4	arrhythmic	12	4	0.0969912	14	7	6	arrhythmic	13	4	0.209128	12	12	6	arrhythmic	11	3	0.039729	12	10	7	arrhythmic	11	1	0.00612939	7	1	3	half-annual	6	10	5.07138e-05	15	9	10	annual	14	6	0.295449	11	2
OG0004110	Lthed_scf0100.1_g067490.1	Qgl_scf0100.1_g046340.1	AT2G21960.1	AT2G21960.1	0.974667	4	3	1	arrhythmic	4	12	0.0228853	18	9	6	arrhythmic	17	6	0.888253	14	14	13	arrhythmic	13	5	0.0652094	13	7	7	arrhythmic	12	11	0.962329	10	8	4	arrhythmic	9	5	0.281743	12	6	3	arrhythmic	11	3	0.13428	13	13
OG0004111	Lthed_scf0100.1_g098920.1	Qgl_scf0100.1_g005470.1	AT5G10080.1	AT5G10080.1	0.951434	11	9	4	arrhythmic	10	6	0.133942	12	11	11	arrhythmic	11	8	0.000182083	15	13	11	annual	14	4	3.76112e-07	12	1	10	annual	11	5	1.24825e-08	13	7	8	annual	12	4	1.62193e-05	14	8	8	annual	13	5	0.00914434	14	13
OG0004112	Lthed_scf0100.1_g096790.1	Qgl_scf0100.1_g007640.1	AT4G39900.1	AT4G39900.1	0.533321	10	2	4	arrhythmic	9	11	0.00012548	6	6	4	half-annual	6	3	0.99959	6	4	1	arrhythmic	6	8	0.0094488	23	14	12	arrhythmic	21	5	0.0198935	16	10	5	arrhythmic	15	7	0.0544593	13	6	11	arrhythmic	12	3	0.0012255	14	13
OG0004113	Lthed_scf0100.1_g096350.1	Qgl_scf0100.1_g008040.1	AT4G39910.1	AT4G39910.1	0.00588674	12	4	7	annual	11	1	2.08431e-09	13	4	7	annual	12	1	0.0037468	13	11	4	annual	12	2	0.0001095	12	10	6	annual	11	1	0.00898933	11	4	8	annual	10	1	5.32902e-08	13	4	6	annual	12	1	0.000216491	14	9
OG0004117	Lthed_scf0110.1_g075000.1	Qgl_scf0110.1_g020720.1	AT4G28820.2	AT4G28820.1	0.298172	23	11	8	arrhythmic	21	8	0.268373	20	2	15	arrhythmic	18	11	0.963992	6	6	3	arrhythmic	6	10	8.63342e-06	15	10	7	annual	14	1	0.322915	22	3	18	arrhythmic	20	12	0.0128576	12	11	4	arrhythmic	11	8	0.00195885	13	10
OG0004118	Lthed_scf0040.1_g070420.1	Qgl_scf0050.1_g065080.1	AT1G04980.1	AT1G04980.1	1	2	2	1	arrhythmic	2	11	0.000296903	13	12	6	annual	12	9	0.000934112	14	13	13	annual	13	4	0.00333572	12	2	9	annual	11	6	1	2	1	1	arrhythmic	2	10	6.25768e-05	13	11	6	annual	12	8	0.018059	14	12
OG0004120	Lthed_scf0040.1_g064810.1	Qgl_scf0050.1_g069310.1	AT1G11790.1	AT1G11790.1	0.0112726	11	9	4	arrhythmic	10	6	0.00100904	13	5	8	annual	12	2	0.00105708	15	12	12	annual	14	3	0.0103554	15	15	6	arrhythmic	14	6	0.114794	6	2	4	arrhythmic	6	11	0.0436816	14	5	12	arrhythmic	13	2	0.12678	13	1
OG0004122	Lthed_scf0020.1_g175410.1	Qgl_scf0060.1_g110030.1	AT2G46150.1	AT2G46150.1	1	2	1	1	arrhythmic	2	10	1	2	2	1	arrhythmic	2	11	1	13	11	9	arrhythmic	12	2	0.999628	6	5	2	arrhythmic	6	9	0.999981	4	3	2	arrhythmic	4	12	0.227411	11	10	3	arrhythmic	10	7	1	11	4
OG0004123	Lthed_scf0040.1_g062350.1	Qgl_scf0050.1_g072090.1	AT3G21865.1	AT3G21865.1	0.470002	13	8	12	arrhythmic	12	5	0.0167403	12	12	8	arrhythmic	11	9	0.443049	17	9	1	arrhythmic	16	1	0.960266	9	4	4	arrhythmic	8	8	0.233281	13	3	2	arrhythmic	12	12	2.79926e-06	14	10	9	annual	13	7	0.680571	10	4
OG0004124	Lthed_scf0040.1_g062310.1	Qgl_scf0050.1_g072110.1	AT5G35730.1	AT5G35730.1	0.00624597	7	2	4	half-annual	6	11	0.501813	4	4	2	arrhythmic	4	1	0.231149	13	1	2	arrhythmic	12	5	0.00355409	13	9	9	annual	12	12	0.0985304	18	2	8	arrhythmic	17	11	0.00209911	18	16	8	arrhythmic	17	12	0.0424604	6	2
OG0004125	Lthed_scf0040.1_g060300.1	Qgl_scf0050.1_g074790.1	AT4G27310.1	AT4G27310.1	0.244991	18	9	1	arrhythmic	17	6	0.823261	6	6	3	arrhythmic	6	3	0.989788	7	2	5	arrhythmic	6	6	0.0292025	13	8	10	arrhythmic	12	12	0.276327	6	6	1	arrhythmic	6	3	0.000439237	13	11	3	annual	12	8	7.82748e-05	15	3
OG0004129	Lthed_scf0080.1_g105410.1	Qgl_scf0070.1_g006640.1	AT3G43220.1	AT3G43220.1	0.0121229	11	5	8	arrhythmic	10	2	9.79473e-06	13	4	7	annual	12	1	0.000408322	12	12	5	annual	11	3	1.31045e-05	12	10	8	annual	11	1	0.000801321	12	4	9	annual	11	1	2.50995e-08	13	4	6	annual	12	1	0.0322829	13	8
OG0004130	Lthed_scf0080.1_g105270.1	Qgl_scf0070.1_g006730.1	AT1G79940.3	AT1G79940.3	0.0056108	13	9	8	annual	12	6	0.000111824	14	1	3	annual	13	10	0.00282474	13	8	11	annual	12	12	0.990766	11	9	5	arrhythmic	10	12	0.294171	6	2	4	arrhythmic	6	11	0.180947	7	1	3	arrhythmic	6	10	2.67993e-05	13	8
OG0004133	Lthed_scf0010.1_g083060.1	Qgl_scf0020.1_g080010.1	AT4G26060.1	AT4G26060.1	0.128283	10	9	6	arrhythmic	9	6	0.0229291	12	4	11	arrhythmic	11	1	0.281585	13	11	7	arrhythmic	12	2	1.81821e-05	12	10	6	annual	11	1	0.0249866	14	1	10	arrhythmic	13	10	0.000379143	23	16	13	arrhythmic	21	12	0.650904	23	1
OG0004135	Lthed_scf0010.1_g081750.1	Qgl_scf0020.1_g079280.1	AT2G19490.1	AT2G19490.1	0.0125959	13	3	9	arrhythmic	12	12	0.040654	15	2	7	arrhythmic	14	11	0.984842	5	5	3	arrhythmic	5	9	0.0564297	23	1	14	arrhythmic	21	5	1.24369e-07	13	5	6	annual	12	2	8.151e-06	13	4	8	annual	12	1	0.000105347	12	11
OG0004137	Lthed_scf0010.1_g081300.1	Qgl_scf0020.1_g078710.1	AT5G56980.1	AT5G56980.1	0.106513	8	8	4	arrhythmic	7	5	7.46682e-09	13	11	4	annual	12	8	6.91814e-06	14	13	9	annual	13	4	0.107479	7	2	4	arrhythmic	6	6	6.79884e-05	6	6	2	half-annual	6	3	0.888734	7	3	5	arrhythmic	6	12	0.000722688	14	4
OG0004140	Lthed_scf0010.1_g038120.1	Qgl_scf0020.1_g036470.1	AT5G19600.1	AT5G19600.1	1	13	9	4	arrhythmic	12	6	0.108318	23	20	5	arrhythmic	21	4	1	14	13	8	arrhythmic	13	4	0.0923815	10	3	4	arrhythmic	9	7	1.43331e-05	15	7	11	annual	14	4	0.00173466	13	11	7	annual	12	8	0.832382	6	3
OG0004141	Lthed_scf0010.1_g037840.1	Qgl_scf0020.1_g036250.1	AT4G13350.2	AT4G13350.2	6.91195e-06	18	16	10	arrhythmic	17	12	5.13171e-07	14	3	6	annual	13	12	0.161957	14	9	8	arrhythmic	13	1	0.0646234	20	3	7	arrhythmic	18	7	0.00227327	12	4	3	annual	11	1	3.18258e-09	13	4	6	annual	12	1	0.11563	15	9
OG0004142	Lthed_scf0010.1_g036970.1	Qgl_scf0020.1_g035500.1	AT1G08510.1	AT1G08510.1	1.36529e-05	14	9	10	annual	13	6	0.000312803	13	12	6	annual	12	9	0.000254758	14	1	9	annual	13	5	0.00040868	12	3	9	annual	11	7	0.000143613	12	10	6	annual	11	7	2.70003e-08	13	11	6	annual	12	8	7.20157e-06	15	1
OG0004143	Lthed_scf0010.1_g035010.1	Qgl_scf0020.1_g033620.1	AT5G20060.4	AT5G20060.4	3.38386e-05	13	8	9	annual	12	5	0.0528598	7	7	3	arrhythmic	6	4	0.000468287	12	3	4	annual	11	7	0.00500405	23	10	14	arrhythmic	21	1	0.00429447	12	8	8	annual	11	5	0.0150758	12	8	9	arrhythmic	11	5	0.034164	15	13
OG0004144	Lthed_scf0010.1_g029860.1	Qgl_scf0020.1_g029160.1	AT5G52580.1	AT5G52580.1	1.09593e-06	13	4	5	annual	12	1	0.00187234	12	4	8	annual	11	1	0.000353499	13	9	9	annual	12	1	2.79749e-06	12	10	4	annual	11	1	3.05173e-06	12	4	8	annual	11	1	0.00922414	13	4	6	annual	12	1	3.6879e-06	13	9
OG0004145	Lthed_scf0010.1_g029470.1	Qgl_scf0020.1_g029030.1	AT3G42170.1	AT3G42170.2	0.0149164	13	8	9	arrhythmic	12	5	4.01413e-05	13	11	6	annual	12	8	0.931609	7	5	3	arrhythmic	6	9	0.0407964	20	1	8	arrhythmic	18	5	0.0119019	12	10	6	arrhythmic	11	7	2.68461e-06	14	11	6	annual	13	8	0.00867197	13	3
OG0004146	Lthed_scf0010.1_g028500.1	Qgl_scf0020.1_g028090.1	AT5G20300.5	AT5G20300.5	0.964631	7	6	3	arrhythmic	6	3	0.00803883	13	11	5	annual	12	8	0.356639	13	8	6	arrhythmic	12	12	0.00447213	23	22	11	arrhythmic	21	12	0.014065	12	4	3	arrhythmic	11	1	9.37177e-08	14	2	8	annual	13	11	0.0147643	14	10
OG0004147	Lthed_scf0070.1_g077870.1	Qgl_scf0080.1_g069640.1	AT2G30390.1	AT2G30390.1	0.152978	7	6	3	arrhythmic	6	3	0.982374	10	8	6	arrhythmic	9	5	0.00784272	16	14	15	annual	15	5	0.00335218	13	5	9	annual	12	9	0.236165	6	6	1	arrhythmic	6	3	3.774e-06	13	5	4	annual	12	2	0.326767	8	1
OG0004148	Lthed_scf0120.1_g086610.1	Qgl_scf0120.1_g075820.1	AT2G30580.2	AT2G30580.2	2.20226e-05	14	6	3	annual	13	3	3.98855e-06	12	5	8	annual	11	2	6.16461e-07	13	10	4	annual	12	1	0.0031618	23	21	20	arrhythmic	21	11	9.33881e-07	11	5	3	annual	10	2	2.48236e-09	13	5	5	annual	12	2	2.92309e-05	14	10
OG0004150	Lthed_scf0090.1_g079390.1	Qgl_scf0060.1_g032920.1	AT5G29000.2	AT4G28610.1	0.00507089	13	3	9	annual	12	12	9.92643e-07	13	4	7	annual	12	1	0.657867	6	4	3	arrhythmic	6	8	0.342775	7	2	5	arrhythmic	6	6	2.45538e-06	13	3	8	annual	12	12	1.29786e-08	14	4	6	annual	13	1	0.000504211	14	10
OG0004151	Lthed_scf0090.1_g080370.1	Qgl_scf0060.1_g031900.1	AT2G20390.1	AT2G20390.1	0.114109	11	5	4	arrhythmic	10	2	0.000150752	11	5	4	annual	10	2	0.033655	7	1	4	arrhythmic	6	5	0.000442242	13	9	6	annual	12	12	0.000340423	12	5	4	annual	11	2	0.0425999	12	6	7	arrhythmic	11	3	0.0166095	14	12
OG0004152	Lthed_scf0090.1_g081410.1	Qgl_scf0060.1_g030940.1	AT2G20320.2	AT2G20320.2	5.47114e-06	13	4	6	annual	12	1	4.59434e-06	13	4	9	annual	12	1	7.36985e-07	12	11	4	annual	11	2	1.13435e-08	12	10	6	annual	11	1	0.00309041	14	2	9	annual	13	11	2.16784e-07	13	4	6	annual	12	1	1.09808e-06	14	10
OG0004153	Lthed_scf0040.1_g071180.1	Qgl_scf0050.1_g064480.1	AT3G07890.5	AT3G07890.5	0.573933	13	9	6	arrhythmic	12	6	6.50495e-11	12	12	7	annual	11	9	0.121507	7	6	6	arrhythmic	6	10	0.982846	13	6	2	arrhythmic	12	10	4.47034e-06	12	12	4	annual	11	9	4.34335e-10	13	11	7	annual	12	8	0.00424341	14	13
OG0004154	Lthed_scf0040.1_g072550.1	Qgl_scf0050.1_g062320.1	AT2G04850.1	AT2G04850.1	1	13	9	8	arrhythmic	12	6	2.55769e-05	12	12	4	annual	11	9	2.07479e-06	14	13	11	annual	13	4	0.000301865	12	3	7	annual	11	7	3.74327e-07	12	12	4	annual	11	9	3.28309e-08	13	1	2	annual	12	10	0.0260703	13	1
OG0004155	Lthed_scf0030.1_g050760.1	Qgl_scf0010.1_g140620.1	AT3G22290.2	AT3G22290.2	0.00166808	12	12	3	annual	11	9	0.0575408	13	12	6	arrhythmic	12	9	0.25722	20	13	12	arrhythmic	18	4	0.773287	6	4	2	arrhythmic	6	8	0.0035342	12	7	10	annual	11	4	1.59856e-06	12	10	7	annual	11	7	0.978282	6	1
OG0004158	Lthed_scf0010.1_g171510.1	Qgl_scf0020.1_g167370.1	AT1G76280.5	AT1G76280.5	8.95431e-07	12	4	8	annual	11	1	1.69866e-09	13	3	9	annual	12	12	0.898022	3	1	2	arrhythmic	3	5	0.0510121	12	6	4	arrhythmic	11	10	1.05259e-05	12	4	6	annual	11	1	3.13807e-09	14	4	5	annual	13	1	0.983716	7	6
OG0004160	Lthed_scf0080.1_g073550.1	Qgl_scf0070.1_g039700.1	AT1G74630.2	AT1G74630.2	0.0533841	20	5	10	arrhythmic	18	2	0.247758	14	12	9	arrhythmic	13	9	0.0141755	14	6	5	arrhythmic	13	10	0.000537985	12	2	8	annual	11	6	0.991713	7	5	1	arrhythmic	6	2	0.000418309	23	6	8	arrhythmic	21	3	0.965841	13	13
OG0004167	Lthed_scf0070.1_g024350.1	Qgl_scf0080.1_g018590.1	AT5G62570.1	AT5G62570.1	0.751612	6	4	2	arrhythmic	6	1	0.0780538	15	11	7	arrhythmic	14	8	0.9886	14	6	1	arrhythmic	13	10	0.578051	7	1	6	arrhythmic	6	5	0.0389761	11	4	4	arrhythmic	10	1	4.0491e-05	13	1	9	annual	12	10	0.978857	7	3
OG0004171	Lthed_scf0070.1_g019610.1	Qgl_scf0080.1_g014580.1	AT3G48210.1	AT3G48210.1	9.79213e-08	13	4	7	annual	12	1	1.39701e-09	13	4	8	annual	12	1	0.254863	13	13	2	arrhythmic	12	4	0.000992375	13	11	7	annual	12	2	0.000517068	12	4	7	annual	11	1	3.99045e-05	13	3	10	annual	12	12	0.162923	14	12
OG0004172	Lthed_scf0070.1_g014090.1	Qgl_scf0080.1_g010820.1	AT3G48330.4	AT3G48330.4	0.304785	11	10	10	arrhythmic	10	7	0.247456	16	9	8	arrhythmic	15	6	0.00476701	14	3	7	annual	13	7	0.0801589	14	2	9	arrhythmic	13	6	0.0193701	6	4	4	arrhythmic	6	1	0.00165345	13	4	4	annual	12	1	0.0379871	7	3
OG0004173	Lthed_scf0070.1_g006440.1	Qgl_scf0080.1_g005530.1	AT1G67340.1	AT1G67340.1	0.115793	13	9	10	arrhythmic	12	6	0.0334444	7	2	5	arrhythmic	6	11	0.0291117	11	4	6	arrhythmic	10	8	0.0118124	17	11	8	arrhythmic	16	2	0.0296792	6	3	3	arrhythmic	6	12	0.0349559	6	4	2	arrhythmic	6	1	9.64018e-06	14	10
OG0004174	Lthed_scf0120.1_g018420.1	Qgl_scf0120.1_g014150.1	AT5G47180.2	AT5G47180.2	0.000796394	13	9	10	annual	12	6	0.000414496	12	12	7	annual	11	9	0.863582	14	13	10	arrhythmic	13	4	0.0159034	23	15	10	arrhythmic	21	6	0.00216998	9	1	5	annual	8	10	2.49032e-05	13	12	5	annual	12	9	0.00104329	13	1
OG0004176	Lthed_scf0120.1_g019980.1	Qgl_scf0120.1_g016480.1	AT3G60340.2	AT3G60340.2	0.00186695	12	11	7	annual	11	8	1.70144e-05	12	12	6	annual	11	9	0.000281903	12	5	6	annual	11	9	0.191963	11	5	7	arrhythmic	10	9	0.128907	12	11	4	arrhythmic	11	8	0.000184153	13	12	4	annual	12	9	0.000112189	12	3
OG0004177	Lthed_scf0120.1_g020030.1	Qgl_scf0120.1_g016550.1	AT4G17440.2	AT4G17440.2	0.413358	11	5	3	arrhythmic	10	2	0.231272	17	5	7	arrhythmic	16	2	0.0337594	14	7	6	arrhythmic	13	11	0.00909421	13	5	6	annual	12	9	0.000443887	12	3	5	annual	11	12	0.000315064	13	4	6	annual	12	1	0.048716	23	11
OG0004178	Lthed_scf0010.1_g153900.1	Qgl_scf0020.1_g143970.1	AT4G16720.1	AT4G16720.1	0.0658719	22	5	16	arrhythmic	20	2	0.013548	12	2	6	arrhythmic	11	11	0.526544	8	5	5	arrhythmic	7	9	0.212507	14	5	7	arrhythmic	13	9	0.421846	12	7	2	arrhythmic	11	4	0.085842	23	11	2	arrhythmic	21	8	2.26526e-06	13	11
OG0004179	Lthed_scf0120.1_g021620.1	Qgl_scf0120.1_g017830.1	AT4G16600.1	AT2G35710.1	0.000543327	13	3	9	annual	12	12	6.3512e-08	14	2	6	annual	13	11	2.59364e-09	14	9	8	annual	13	1	2.39587e-08	14	8	8	annual	13	12	1.69803e-05	13	2	9	annual	12	11	1.50494e-11	14	2	9	annual	13	11	2.81565e-07	14	9
OG0004180	Lthed_scf0120.1_g017830.1	Qgl_scf0120.1_g013810.1	AT4G17040.1	AT4G17040.1	0.212075	19	18	10	arrhythmic	17	2	0.0841104	13	1	8	arrhythmic	12	10	0.500597	22	14	20	arrhythmic	20	5	0.855508	6	2	2	arrhythmic	6	6	0.0121625	12	6	3	arrhythmic	11	3	0.0137312	13	8	1	arrhythmic	12	5	0.0158929	14	12
OG0004183	Lthed_scf0120.1_g007480.1	Qgl_scf0120.1_g006110.1	AT4G19185.1	AT4G19185.1	0.070651	11	3	5	arrhythmic	10	12	2.57689e-05	13	4	8	annual	12	1	9.36391e-06	13	11	4	annual	12	2	1.14239e-06	13	9	7	annual	12	12	0.011827	6	4	4	arrhythmic	6	1	2.19433e-05	15	2	8	annual	14	11	1.26127e-06	14	10
OG0004184	Lthed_scf0120.1_g007910.1	Qgl_scf0120.1_g006600.1			0.000273122	12	5	3	annual	11	2	0.00150624	12	5	7	annual	11	2	6.17079e-05	13	11	6	annual	12	2	6.44673e-09	12	10	8	annual	11	1	0.00543643	12	4	4	annual	11	1	0.0647528	23	6	14	arrhythmic	21	3	0.00913769	15	9
OG0004185	Lthed_scf0120.1_g007350.1	Qgl_scf0120.1_g005840.1	AT4G19230.1	AT4G19230.1	0.967085	10	7	1	arrhythmic	9	4	0.0675957	7	7	5	arrhythmic	6	4	0.00432759	12	2	6	annual	11	6	0.985582	13	8	12	arrhythmic	12	12	0.0204723	10	5	5	arrhythmic	9	2	0.402207	17	5	16	arrhythmic	16	2	0.000114857	11	4
OG0004188	Lthed_scf0120.1_g014280.1	Qgl_scf0120.1_g010500.1	AT1G32400.3	AT1G32400.3	0.00262867	13	4	7	annual	12	1	0.00309211	13	3	7	annual	12	12	0.148169	14	9	7	arrhythmic	13	1	0.0344029	12	10	3	arrhythmic	11	1	0.0485244	13	3	9	arrhythmic	12	12	0.401361	21	16	11	arrhythmic	19	12	0.00369835	14	10
OG0004190	Lthed_scf0120.1_g001660.1	Qgl_scf0120.1_g001820.1	AT4G19070.2	AT4G19070.1	0.980332	4	2	2	arrhythmic	4	11	0.0842624	14	5	5	arrhythmic	13	2	0.718859	13	7	6	arrhythmic	12	11	0.00105514	14	11	5	annual	13	2	0.371253	23	8	6	arrhythmic	21	5	0.00224451	13	7	5	annual	12	4	0.0765284	7	5
OG0004191	Lthed_scf0010.1_g008910.1	Qgl_scf0020.1_g009950.1	AT4G34660.3	AT4G34660.1	4.19287e-05	13	3	10	annual	12	12	8.36389e-05	13	5	5	annual	12	2	0.00036113	13	8	12	annual	12	12	0.000790642	12	9	9	annual	11	12	0.0083254	6	4	3	half-annual	6	1	5.41057e-06	13	4	6	annual	12	1	0.0450351	7	3
OG0004192	Lthed_scf0010.1_g150760.1	Qgl_scf0020.1_g141130.1	AT2G46800.5	AT2G46800.5	0.00325084	18	8	11	arrhythmic	17	5	0.00549713	12	12	5	annual	11	9	0.36692	23	5	18	arrhythmic	21	9	0.0501672	16	11	10	arrhythmic	15	2	0.000936196	6	4	4	half-annual	6	1	0.000115659	13	12	4	annual	12	9	0.000347623	15	12
OG0004193	Lthed_scf0010.1_g150360.1	Qgl_scf0020.1_g140770.1	AT1G32930.1	AT1G32930.1	0.00634998	23	8	15	arrhythmic	21	5	0.45062	12	12	10	arrhythmic	11	9	0.000267544	14	13	9	annual	13	4	0.000609429	23	15	2	arrhythmic	21	6	0.00592912	6	1	4	half-annual	6	10	1.02998e-06	13	10	6	annual	12	7	5.03486e-05	7	6
OG0004194	Lthed_scf0010.1_g149980.1	Qgl_scf0020.1_g140310.1	AT1G32790.1	AT1G32790.1	0.0233385	17	8	13	arrhythmic	16	5	0.0161341	14	1	10	arrhythmic	13	10	0.262459	14	13	13	arrhythmic	13	4	0.84517	6	4	2	arrhythmic	6	8	0.212219	6	6	2	arrhythmic	6	3	0.00536611	13	5	4	annual	12	2	0.485209	6	5
OG0004195	Lthed_scf0010.1_g149100.1	Qgl_scf0020.1_g139300.1	AT4G17880.1	AT4G17880.1	1	2	1	1	arrhythmic	2	10	1	8	4	5	arrhythmic	7	1	1	14	4	4	arrhythmic	13	8	0.00243825	14	4	5	annual	13	8	0.000129868	12	11	4	annual	11	8	2.45492e-07	13	12	3	annual	12	9	0.292377	19	18
OG0004197	Lthed_scf0010.1_g148000.1	Qgl_scf0020.1_g138330.1	AT4G24100.1	AT4G24100.4	4.58744e-06	14	3	9	annual	13	12	3.50081e-06	14	3	9	annual	13	12	0.02556	13	10	4	arrhythmic	12	1	0.0639012	23	1	9	arrhythmic	21	5	0.0169326	12	5	2	arrhythmic	11	2	6.82215e-09	14	4	6	annual	13	1	0.0255144	13	10
OG0004198	Lthed_scf0010.1_g147370.1	Qgl_scf0020.1_g137580.1	AT5G24320.1	AT5G24320.1	0.423357	21	3	10	arrhythmic	19	12	0.403931	23	9	3	arrhythmic	21	6	0.000242728	14	10	3	annual	13	1	0.000282681	13	8	10	annual	12	12	0.0482807	12	3	7	arrhythmic	11	12	0.0369208	12	4	4	arrhythmic	11	1	1.00692e-06	13	11
OG0004200	Lthed_scf0010.1_g145010.1	Qgl_scf0020.1_g135390.1	AT4G10930.2	AT4G10930.2	0.00345415	17	2	6	annual	16	11	0.266067	23	21	8	arrhythmic	21	5	0.00214792	13	10	6	annual	12	1	0.0137193	18	2	9	arrhythmic	17	6	0.159208	12	6	1	arrhythmic	11	3	1.57743e-09	14	5	4	annual	13	2	0.000602085	12	10
OG0004201	Lthed_scf0010.1_g144380.1	Qgl_scf0020.1_g134400.1	AT5G53110.1	AT5G53110.1	0.0121951	7	6	4	arrhythmic	6	3	3.38152e-05	13	9	7	annual	12	6	0.0805463	19	1	7	arrhythmic	17	5	0.292204	11	1	9	arrhythmic	10	5	0.0121086	12	10	10	arrhythmic	11	7	0.984195	4	2	2	arrhythmic	4	11	0.0145474	7	3
OG0004202	Lthed_scf0010.1_g137380.1	Qgl_scf0020.1_g128580.1	AT5G41580.1	AT5G41580.1	0.597864	17	4	5	arrhythmic	16	1	2.63032e-09	13	3	9	annual	12	12	0.000144734	12	12	3	annual	11	3	0.00979291	13	8	10	annual	12	12	0.00417679	6	4	4	half-annual	6	1	3.26382e-10	13	4	7	annual	12	1	2.41708e-05	13	11
OG0004203	Lthed_scf0120.1_g066850.1	Qgl_scf0120.1_g059360.1	AT5G41350.3	AT5G41350.3	0.00684293	14	3	6	annual	13	12	8.04115e-09	13	3	8	annual	12	12	0.00233609	13	11	3	annual	12	2	1.91721e-06	13	11	5	annual	12	2	0.000169477	12	3	9	annual	11	12	5.28365e-09	13	4	7	annual	12	1	7.3012e-06	14	10
OG0004204	Lthed_scf0120.1_g066970.1	Qgl_scf0120.1_g059550.1	AT2G45970.1	AT4G00360.1	1	13	9	7	arrhythmic	12	6	8.56207e-06	12	12	4	annual	11	9	0.000988643	14	13	11	annual	13	4	1	12	3	8	arrhythmic	11	7	0.0223239	11	8	9	arrhythmic	10	5	5.19071e-09	13	11	6	annual	12	8	0.096342	12	7
OG0004205	Lthed_scf0120.1_g068690.1	Qgl_scf0120.1_g060770.1	AT5G41210.1	AT5G41210.1	0.144287	16	3	5	arrhythmic	15	12	0.968041	12	3	7	arrhythmic	11	12	0.00453083	15	14	10	annual	14	5	0.278436	11	4	8	arrhythmic	10	8	7.43303e-08	13	5	5	annual	12	2	0.202678	13	7	6	arrhythmic	12	4	0.0996766	12	5
OG0004206	Lthed_scf0120.1_g033710.1	Qgl_scf0120.1_g029770.1	AT5G23750.2	AT5G23750.2	0.0821056	12	10	7	arrhythmic	11	7	2.33493e-06	13	11	7	annual	12	8	2.43649e-05	13	1	10	annual	12	5	3.87507e-05	12	5	5	annual	11	9	3.71412e-05	12	9	11	annual	11	6	3.81709e-06	13	13	4	annual	12	10	4.90109e-06	13	4
OG0004207	Lthed_scf0120.1_g031730.1	Qgl_scf0120.1_g027630.1	AT1G12650.4	AT1G12650.4	0.821669	7	1	6	arrhythmic	6	10	0.00196238	14	2	7	annual	13	11	0.649855	7	3	2	arrhythmic	6	7	0.032395	11	10	4	arrhythmic	10	1	1.8275e-05	12	7	2	annual	11	4	1.13104e-07	13	5	6	annual	12	2	0.0304565	13	9
OG0004208	Lthed_scf0120.1_g030730.1	Qgl_scf0120.1_g026120.1	AT1G62990.1	AT1G62990.1	1.48336e-05	14	7	9	annual	13	4	1.3903e-08	15	9	5	annual	14	6	0.283949	14	14	1	arrhythmic	13	5	0.0426983	13	11	9	arrhythmic	12	2	0.0595073	7	4	2	arrhythmic	6	1	0.0294398	21	3	18	arrhythmic	19	12	9.79353e-05	14	4
OG0004209	Lthed_scf0120.1_g030510.1	Qgl_scf0120.1_g025910.1	AT4G22890.4	AT4G22890.3	0.307739	13	11	4	arrhythmic	12	8	0.631548	17	8	16	arrhythmic	16	5	3.47055e-06	13	4	5	annual	12	8	0.000541319	12	6	4	annual	11	10	0.0444802	13	5	6	arrhythmic	12	2	0.000133655	13	5	4	annual	12	2	0.0978948	12	1
OG0004210	Lthed_scf0120.1_g028300.1	Qgl_scf0120.1_g024600.1	AT4G22860.1	AT4G22860.1	0.0118756	13	4	9	arrhythmic	12	1	0.665942	7	4	2	arrhythmic	6	1	0.000346567	14	13	3	annual	13	4	0.0593181	12	11	6	arrhythmic	11	2	0.0141175	12	7	9	arrhythmic	11	4	4.00046e-06	14	9	8	annual	13	6	0.000531555	7	5
OG0004212	Lthed_scf0040.1_g027520.1	Qgl_scf0050.1_g109870.1	AT4G22740.2	AT4G22740.2	0.0739257	7	4	4	arrhythmic	6	1	0.992482	7	4	3	arrhythmic	6	1	0.0624024	14	9	4	arrhythmic	13	1	0.0120623	11	11	3	arrhythmic	10	2	0.0265352	12	4	4	arrhythmic	11	1	0.00655684	12	5	4	annual	11	2	8.98207e-05	13	11
OG0004215	Lthed_scf0120.1_g023690.1	Qgl_scf0120.1_g020100.1	AT4G22540.5	AT4G22540.5	0.112392	14	5	5	arrhythmic	13	2	0.10575	15	3	5	arrhythmic	14	12	0.000710443	14	13	6	annual	13	4	0.221724	15	1	1	arrhythmic	14	5	0.0083254	6	2	3	half-annual	6	11	0.00259802	13	7	10	annual	12	4	0.00169413	14	4
OG0004217	Lthed_scf0040.1_g083670.1	Qgl_scf0050.1_g052760.1	AT1G53490.1	AT1G53490.1	5.59364e-05	12	4	8	annual	11	1	2.54964e-09	13	4	8	annual	12	1	0.0127356	12	10	7	arrhythmic	11	1	0.000218387	13	9	7	annual	12	12	2.61428e-06	13	4	6	annual	12	1	2.38417e-05	13	4	10	annual	12	1	0.00912005	14	12
OG0004218	Lthed_scf0040.1_g081570.1	Qgl_scf0050.1_g055370.1	AT1G16920.1	AT1G16920.1	0.207037	7	1	3	arrhythmic	6	10	0.000112183	13	12	6	annual	12	9	8.71069e-06	14	13	12	annual	13	4	0.0117338	12	3	8	arrhythmic	11	7	0.00875909	12	7	10	annual	11	4	1.77572e-06	13	10	7	annual	12	7	2.26616e-05	13	13
OG0004219	Lthed_scf0040.1_g052040.1	Qgl_scf0050.1_g086800.1	AT2G42580.1	AT2G42580.1	0.000489059	12	12	4	annual	11	9	1.48606e-06	12	12	4	annual	11	9	3.00289e-06	14	13	11	annual	13	4	0.000146221	11	4	6	annual	10	8	0.0344809	11	8	8	arrhythmic	10	5	3.49469e-09	13	11	5	annual	12	8	0.000946204	14	12
OG0004220	Lthed_scf0040.1_g077600.1	Qgl_scf0050.1_g057840.1	AT1G17780.5	AT2G16575.1	0.00322756	16	3	5	annual	15	12	0.201641	11	3	5	arrhythmic	10	12	0.00783862	13	11	3	annual	12	2	0.000280134	13	11	3	annual	12	2	0.000865682	12	5	3	annual	11	2	0.00656446	12	4	4	annual	11	1	0.000139672	12	10
OG0004221	Lthed_scf0040.1_g095700.1	Qgl_scf0050.1_g043980.1	AT3G15354.3	AT3G15354.3	0.0904653	10	7	5	arrhythmic	9	4	0.0203493	10	6	7	arrhythmic	9	3	0.00818051	13	12	1	annual	12	3	0.0202856	11	11	5	arrhythmic	10	2	0.135876	11	6	5	arrhythmic	10	3	3.41185e-06	13	4	6	annual	12	1	0.319602	13	8
OG0004222	Lthed_scf0040.1_g095010.1	Qgl_scf0050.1_g044500.1	AT4G27520.1	AT5G53870.1	5.62312e-07	15	1	7	annual	14	10	1.25808e-07	13	3	7	annual	12	12	0.0393285	12	3	8	arrhythmic	11	7	0.972096	6	3	2	arrhythmic	6	7	1.55943e-07	13	2	8	annual	12	11	1.13422e-10	13	2	8	annual	12	11	0.245743	15	9
OG0004223	Lthed_scf0040.1_g100550.1	Qgl_scf0050.1_g040710.1	AT1G52980.1	AT1G52980.1	0.000124555	13	1	8	annual	12	10	0.00316387	13	2	10	annual	12	11	0.00719813	7	3	3	half-annual	6	7	0.00282409	15	7	5	annual	14	11	3.09046e-05	12	5	3	annual	11	2	1.6254e-10	14	4	7	annual	13	1	0.000570101	14	11
OG0004226	Lthed_scf0040.1_g105550.1	Qgl_scf0050.1_g035710.1	AT4G21450.1	AT5G54110.1	0.083734	14	13	4	arrhythmic	13	10	5.7044e-08	13	11	6	annual	12	8	4.97884e-05	13	4	4	annual	12	8	1.52034e-07	13	2	8	annual	12	6	0.292593	6	1	2	arrhythmic	6	10	1.55386e-05	12	10	8	annual	11	7	4.9625e-05	13	5
OG0004228	Lthed_scf0040.1_g122340.1	Qgl_scf0050.1_g018650.1	AT4G26780.1	AT4G26780.1	0.0479992	15	1	6	arrhythmic	14	10	6.32586e-06	15	2	7	annual	14	11	0.159031	7	3	2	arrhythmic	6	7	1.61816e-05	13	10	5	annual	12	1	0.0248869	13	5	7	arrhythmic	12	2	1.13351e-05	13	5	7	annual	12	2	0.000257471	12	12
OG0004229	Lthed_scf0040.1_g123360.1	Qgl_scf0050.1_g017840.1	AT1G16240.4	AT1G16240.4	0.144285	10	9	7	arrhythmic	9	6	0.940951	7	3	2	arrhythmic	6	12	0.0700628	14	14	7	arrhythmic	13	5	0.0380041	17	10	13	arrhythmic	16	1	0.0469611	12	4	10	arrhythmic	11	1	0.32969	14	3	10	arrhythmic	13	12	0.971958	17	15
OG0004231	Lthed_scf0040.1_g126410.1	Qgl_scf0050.1_g014600.1	AT5G55580.1	AT5G55580.1	0.13108	12	1	4	arrhythmic	11	10	0.0129797	18	13	11	arrhythmic	17	10	0.0177835	13	5	8	arrhythmic	12	9	0.00104588	13	6	3	annual	12	10	0.00299058	11	4	5	annual	10	1	3.20439e-06	13	3	6	annual	12	12	0.000503519	12	10
OG0004232	Lthed_scf0040.1_g129380.1	Qgl_scf0050.1_g010840.1	AT5G55760.1	AT5G55760.1	0.05006	12	11	6	arrhythmic	11	8	0.00151317	14	1	4	annual	13	10	0.272896	7	3	2	arrhythmic	6	7	0.480435	17	5	8	arrhythmic	16	9	0.14433	6	6	3	arrhythmic	6	3	0.0257909	7	4	4	arrhythmic	6	1	2.86535e-05	13	10
OG0004233	Lthed_scf0040.1_g130280.1	Qgl_scf0050.1_g010030.1	AT5G47750.1	AT5G47750.1	0.0112246	11	8	6	arrhythmic	10	5	0.394823	7	5	4	arrhythmic	6	2	0.000124779	14	13	4	annual	13	4	0.0119033	13	1	7	arrhythmic	12	5	8.07103e-08	12	8	8	annual	11	5	3.78297e-06	13	10	6	annual	12	7	0.188552	7	7
OG0004239	Lthed_scf0010.1_g115930.1	Qgl_scf0020.1_g101330.1	AT4G25850.1	AT4G25850.1	1.08612e-08	13	10	7	annual	12	7	2.7139e-06	13	12	5	annual	12	9	9.86899e-08	14	1	8	annual	13	5	0.000357763	11	5	6	annual	10	9	0.310519	22	3	13	arrhythmic	20	12	2.36526e-06	14	9	10	annual	13	6	0.00215554	14	2
OG0004241	Lthed_scf0100.1_g082480.1	Qgl_scf0100.1_g032280.1	AT4G37680.4	AT4G37680.4	2.823e-05	17	16	9	annual	16	12	0.00435971	15	2	7	annual	14	11	6.56033e-06	14	7	11	annual	13	11	1.66403e-05	12	10	5	annual	11	1	1.21474e-05	14	2	8	annual	13	11	1.4538e-06	14	2	8	annual	13	11	0.00196427	13	9
OG0004246	Lthed_scf0120.1_g050770.1	Qgl_scf0120.1_g045800.1	AT1G22050.1	AT1G22050.1	0.0120147	11	11	8	arrhythmic	10	8	0.0036451	13	13	5	annual	12	10	0.0406234	15	10	8	arrhythmic	14	1	0.0112989	11	7	6	arrhythmic	10	11	0.00105998	14	8	13	annual	13	5	0.560751	11	1	4	arrhythmic	10	10	0.279439	13	10
OG0004250	Lthed_scf0120.1_g084950.1	Qgl_scf0120.1_g074640.1	AT3G63340.7	AT3G63340.7	0.028977	7	3	5	arrhythmic	6	12	0.0975211	14	3	6	arrhythmic	13	12	0.55792	8	8	5	arrhythmic	7	12	0.00676918	19	6	6	arrhythmic	17	10	0.0345371	6	4	3	arrhythmic	6	1	1.80075e-05	13	5	5	annual	12	2	0.95565	7	3
OG0004255	Lthed_scf0050.1_g112700.1	Qgl_scf0040.1_g138400.1	AT1G09280.1	AT1G09280.1	0.529815	11	8	7	arrhythmic	10	5	0.124691	13	11	10	arrhythmic	12	8	0.157381	14	2	6	arrhythmic	13	6	0.00727668	13	6	2	annual	12	10	0.156588	6	6	3	arrhythmic	6	3	0.152912	7	4	4	arrhythmic	6	1	0.0140222	14	6
OG0004256	Lthed_scf0110.1_g001610.1	Qgl_scf0110.1_g082780.1	AT4G35910.1	AT4G35910.1	0.0334519	17	16	10	arrhythmic	16	12	0.000453381	21	16	14	arrhythmic	19	12	0.405431	17	6	9	arrhythmic	16	10	0.00210305	20	4	10	arrhythmic	18	8	0.00719612	19	15	17	arrhythmic	17	11	4.13425e-05	18	2	5	arrhythmic	17	11	0.40144	22	3
OG0004263	Lthed_scf0100.1_g085630.1	Qgl_scf0100.1_g018610.1	AT2G23620.1	AT2G23620.1	0.000609786	13	9	12	annual	12	6	0.0576158	14	14	12	arrhythmic	13	10	0.997725	13	13	12	arrhythmic	12	4	0.0161959	22	13	4	arrhythmic	20	4	1.94171e-06	14	1	8	annual	13	10	0.000211649	13	1	3	annual	12	10	5.06367e-05	13	5
OG0004265	Lthed_scf0100.1_g090720.1	Qgl_scf0100.1_g014210.1	AT5G66550.1	AT5G66550.1	0.850796	4	2	2	arrhythmic	4	11	0.512291	6	1	5	arrhythmic	6	10	0.976175	10	10	3	arrhythmic	9	1	0.0867562	11	7	3	arrhythmic	10	11	1	8	3	5	arrhythmic	7	12	0.99998	14	4	6	arrhythmic	13	1	1	14	12
OG0004271	Lthed_scf0100.1_g020760.1	Qgl_scf0100.1_g086470.1	AT5G11240.1	AT5G11240.1	0.21866	15	1	6	arrhythmic	14	10	2.55173e-05	13	4	5	annual	12	1	0.507333	6	4	3	arrhythmic	6	8	0.0856511	18	5	7	arrhythmic	17	9	0.0110179	12	6	4	arrhythmic	11	3	1.29467e-07	13	4	7	annual	12	1	2.36048e-05	13	11
OG0004277	Lthed_scf0100.1_g043740.1	Qgl_scf0100.1_g064140.1	AT4G13720.2	AT4G13720.2	0.00214448	15	3	6	annual	14	12	0.00624719	13	2	8	annual	12	11	0.0331418	14	14	9	arrhythmic	13	5	5.41911e-05	12	4	7	annual	11	8	0.0046738	12	5	7	annual	11	2	0.900131	10	1	3	arrhythmic	9	10	0.0111827	20	10
OG0004284	Lthed_scf0100.1_g058790.1	Qgl_scf0100.1_g053590.1	AT1G48360.2	AT1G48360.2	0.84848	12	4	8	arrhythmic	11	1	0.0384475	13	4	6	arrhythmic	12	1	0.00422701	12	11	4	annual	11	2	0.0014006	14	4	5	annual	13	8	0.0115856	13	3	10	arrhythmic	12	12	0.95254	12	4	8	arrhythmic	11	1	0.805153	7	5
OG0004285	Lthed_scf0030.1_g027780.1	Qgl_scf0010.1_g161840.1	AT1G79120.2	AT1G79120.2	0.988084	13	1	8	arrhythmic	12	10	0.022025	13	1	10	arrhythmic	12	10	0.137027	14	7	6	arrhythmic	13	11	0.56341	6	1	2	arrhythmic	6	5	0.969736	10	9	5	arrhythmic	9	6	0.175353	15	2	8	arrhythmic	14	11	0.265893	15	11
OG0004286	Lthed_scf0070.1_g087600.1	Qgl_scf0080.1_g079780.1	AT3G59300.1	AT3G59300.1	0.0033512	13	12	2	annual	12	9	0.0626507	15	9	8	arrhythmic	14	6	0.000107351	16	1	7	annual	15	5	4.50965e-07	12	5	5	annual	11	9	0.732196	18	6	1	arrhythmic	17	3	0.0678597	13	4	4	arrhythmic	12	1	0.003789	15	3
OG0004287	Lthed_scf0070.1_g090610.1	Qgl_scf0080.1_g084030.1	AT1G05950.5	AT1G05950.5	0.00816468	13	5	6	annual	12	2	0.417818	13	13	9	arrhythmic	12	10	0.0421397	14	2	12	arrhythmic	13	6	2.14744e-06	13	3	7	annual	12	7	0.852828	7	6	3	arrhythmic	6	3	0.00206061	13	12	3	annual	12	9	0.104698	5	1
OG0004289	Lthed_scf0100.1_g016250.1	Qgl_scf0100.1_g089160.1	AT4G15820.1	AT4G15820.1	3.40628e-05	14	6	2	annual	13	3	0.117246	13	5	7	arrhythmic	12	2	2.10588e-06	14	9	8	annual	13	1	0.00360109	12	11	5	annual	11	2	0.000789974	13	4	7	annual	12	1	0.000165454	14	5	5	annual	13	2	6.724e-08	14	9
OG0004292	Lthed_scf0100.1_g008010.1	Qgl_scf0100.1_g097810.1	AT5G19050.1	AT5G19050.1	0.0403917	10	3	5	arrhythmic	9	12	0.0251964	14	5	2	arrhythmic	13	2	0.0540324	7	1	3	arrhythmic	6	5	0.829391	6	4	5	arrhythmic	6	8	0.299213	15	3	6	arrhythmic	14	12	0.104386	13	4	5	arrhythmic	12	1	0.23721	13	11
OG0004295	Lthed_scf0100.1_g003470.1	Qgl_scf0100.1_g101710.1	AT1G05430.1	AT1G05430.1	0.0345973	12	8	5	arrhythmic	11	5	0.00135504	12	8	4	annual	11	5	5.39489e-05	13	8	8	annual	12	12	2.55475e-06	13	11	5	annual	12	2	0.0273352	11	8	7	arrhythmic	10	5	0.00163244	11	8	5	annual	10	5	0.000315243	14	8
OG0004296	Lthed_scf0070.1_g097340.1	Qgl_scf0080.1_g090660.1	AT2G43500.9	AT2G43500.9	0.459176	12	10	6	arrhythmic	11	7	0.0465128	13	11	3	arrhythmic	12	8	0.122298	14	12	1	arrhythmic	13	3	0.236104	6	4	4	arrhythmic	6	8	0.000418623	6	5	2	half-annual	6	2	9.02402e-05	13	4	4	annual	12	1	8.78152e-05	13	11
OG0004297	Lthed_scf0100.1_g033970.1	Qgl_scf0100.1_g072550.1	AT2G29420.1	AT2G29420.1	1.3773e-08	13	3	6	annual	12	12	0.256639	13	4	7	arrhythmic	12	1	4.80343e-07	14	10	3	annual	13	1	0.00190345	12	10	5	annual	11	1	3.04024e-05	13	2	8	annual	12	11	0.980533	15	2	6	arrhythmic	14	11	6.42957e-06	7	2
OG0004301	Lthed_scf0020.1_g183240.1	Qgl_scf0030.1_g001580.1	AT3G20240.1	AT3G20240.1	1.52821e-07	12	12	3	annual	11	9	0.0154213	13	6	9	arrhythmic	12	3	0.0846722	14	13	9	arrhythmic	13	4	0.0131913	13	3	4	arrhythmic	12	7	0.550491	7	2	5	arrhythmic	6	11	0.000219342	12	8	7	annual	11	5	0.359598	13	11
OG0004302	Lthed_scf0020.1_g004960.1	Qgl_scf0030.1_g185510.1	AT1G72440.1	AT1G72440.1	0.0120344	14	6	3	arrhythmic	13	3	7.82503e-07	13	3	6	annual	12	12	7.40298e-06	14	9	4	annual	13	1	0.000758857	13	8	7	annual	12	12	9.81113e-05	13	7	2	annual	12	4	1.12556e-08	13	4	6	annual	12	1	4.17753e-06	12	11
OG0004303	Lthed_scf0020.1_g015040.1	Qgl_scf0030.1_g174590.1	AT1G72640.1	AT1G72640.1	0.0724	20	7	5	arrhythmic	18	4	0.0458733	13	13	4	arrhythmic	12	10	0.00622872	14	3	10	annual	13	7	0.0173665	11	7	4	arrhythmic	10	11	0.0652111	11	6	5	arrhythmic	10	3	0.00266151	13	5	4	annual	12	2	0.00113087	13	12
OG0004305	Lthed_scf0020.1_g048140.1	Qgl_scf0030.1_g134070.1	AT5G11460.1	AT5G11460.1	8.43301e-05	13	9	9	annual	12	6	0.0107668	6	6	4	arrhythmic	6	3	1.31669e-06	14	13	10	annual	13	4	0.0260494	10	6	2	arrhythmic	9	10	3.03755e-05	12	8	9	annual	11	5	0.138066	6	2	2	arrhythmic	6	11	0.0167805	14	13
OG0004309	Lthed_scf0020.1_g060500.1	Qgl_scf0030.1_g119880.1	AT1G15290.1	AT1G15290.1	0.012927	11	7	5	arrhythmic	10	4	0.0327506	14	8	8	arrhythmic	13	5	0.309967	23	23	9	arrhythmic	21	1	0.0846708	23	1	12	arrhythmic	21	5	0.0024189	12	6	5	annual	11	3	0.000629788	13	7	3	annual	12	4	0.00222848	13	12
OG0004311	Lthed_scf0050.1_g091780.1	Qgl_scf0040.1_g103160.1	AT1G80750.1	AT1G80750.1	1.00702e-05	12	3	6	annual	11	12	1.4087e-06	13	2	10	annual	12	11	4.75861e-08	14	5	8	annual	13	9	0.0257087	15	4	11	arrhythmic	14	8	7.8231e-11	12	5	3	annual	11	2	2.21267e-09	13	5	7	annual	12	2	2.76893e-09	13	10
OG0004314	Lthed_scf0040.1_g024730.1	Qgl_scf0050.1_g112250.1	AT1G56200.1	AT1G56200.2	0.526907	11	2	7	arrhythmic	10	11	0.0945869	12	5	4	arrhythmic	11	2	5.43286e-05	13	9	4	annual	12	1	0.000434004	13	9	6	annual	12	12	0.493818	10	5	4	arrhythmic	9	2	0.109931	6	4	4	arrhythmic	6	1	0.0010175	14	8
OG0004318	Lthed_scf0010.1_g133570.1	Qgl_scf0020.1_g125670.1	AT1G29670.1	AT1G29670.1	1	14	8	10	arrhythmic	13	5	0.987351	7	3	4	arrhythmic	6	12	1.21598e-05	14	13	12	annual	13	4	0.0688146	13	7	6	arrhythmic	12	11	0.00276525	12	1	3	annual	11	10	5.38711e-08	13	11	6	annual	12	8	2.39792e-07	14	4
OG0004321	Lthed_scf0010.1_g155410.1	Qgl_scf0020.1_g161490.1	AT1G78780.5	AT1G78780.5	4.84146e-08	15	2	7	annual	14	11	2.11144e-09	12	6	6	annual	11	3	3.21374e-06	14	11	2	annual	13	2	0.0011261	20	13	1	arrhythmic	18	4	0.00398321	12	4	4	annual	11	1	0.00189064	13	2	9	annual	12	11	1.97592e-06	13	10
OG0004328	Lthed_scf0060.1_g090710.1	Qgl_scf0090.1_g030510.1	AT4G39670.1	AT4G39670.1	0.127988	13	10	7	arrhythmic	12	7	0.3031	8	4	7	arrhythmic	7	1	0.253651	23	3	18	arrhythmic	21	7	0.0119247	18	13	1	arrhythmic	17	4	0.0597386	12	3	5	arrhythmic	11	12	0.0253755	11	5	4	arrhythmic	10	2	0.0343654	11	4
OG0004332	Lthed_scf0070.1_g048600.1	Qgl_scf0080.1_g040700.1	AT3G18440.1	AT3G18440.1	0.0309729	13	3	10	arrhythmic	12	12	3.72455e-06	13	3	3	annual	12	12	3.19195e-05	14	3	10	annual	13	7	0.0024047	12	9	7	annual	11	12	0.0474495	13	2	4	arrhythmic	12	11	2.51046e-06	12	3	3	annual	11	12	0.256266	7	3
OG0004333	Lthed_scf0070.1_g050490.1	Qgl_scf0080.1_g042110.1	AT1G73805.1	AT1G73805.1	0.957979	5	1	2	arrhythmic	5	10	0.0057161	7	7	3	half-annual	6	4	0.0762327	23	3	19	arrhythmic	21	7	0.00508403	14	3	6	annual	13	7	0.0202774	12	11	4	arrhythmic	11	8	0.12059	13	9	8	arrhythmic	12	6	1.28452e-06	13	2
OG0004336	Lthed_scf0070.1_g059330.1	Qgl_scf0080.1_g051640.1	AT1G18290.1	AT1G18290.1	1	2	1	1	arrhythmic	2	10	1	15	10	10	arrhythmic	14	7	1	14	13	9	arrhythmic	13	4	1	21	14	13	arrhythmic	19	5	0.000699158	10	2	4	annual	9	11	0.647774	12	12	7	arrhythmic	11	9	0.151335	16	3
OG0004337	Lthed_scf0070.1_g064640.1	Qgl_scf0080.1_g056740.1	AT1G73470.1	AT1G73470.2	0.968642	13	6	6	arrhythmic	12	3	0.335556	6	2	3	arrhythmic	6	11	1.98194e-06	14	3	6	annual	13	7	1.6474e-07	12	5	5	annual	11	9	0.000337155	11	8	8	annual	10	5	6.07921e-05	12	11	5	annual	11	8	0.0790882	15	2
OG0004338	Lthed_scf0090.1_g023840.1	Qgl_scf0060.1_g089600.1	AT3G49080.1	AT3G49080.1	0.348457	12	11	11	arrhythmic	11	8	0.00022343	14	2	6	annual	13	11	0.083406	14	3	7	arrhythmic	13	7	0.0305428	17	4	9	arrhythmic	16	8	0.0143799	6	6	3	arrhythmic	6	3	0.00188437	13	5	6	annual	12	2	0.165872	14	12
OG0004339	Lthed_scf0080.1_g095430.1	Qgl_scf0070.1_g018160.1			0.0102165	7	6	3	arrhythmic	6	3	0.707432	6	1	3	arrhythmic	6	10	0.0411135	13	2	9	arrhythmic	12	6	0.0109898	12	6	4	arrhythmic	11	10	0.679692	6	1	4	arrhythmic	6	10	0.000828732	11	8	8	annual	10	5	0.0369564	15	3
OG0004344	Lthed_scf0070.1_g073350.1	Qgl_scf0080.1_g068240.1	AT5G23570.3	AT5G23570.3	8.03746e-11	13	12	5	annual	12	9	4.17646e-05	14	11	7	annual	13	8	1.77936e-07	13	5	4	annual	12	9	5.54774e-10	13	4	6	annual	12	8	0.0112163	13	12	8	arrhythmic	12	9	0.0105855	23	1	16	arrhythmic	21	10	0.208559	5	2
OG0004346	Lthed_scf0030.1_g142410.1	Qgl_scf0010.1_g028960.1	AT4G30890.3	AT4G30890.3	0.931739	4	3	2	arrhythmic	4	12	0.229067	7	4	2	arrhythmic	6	1	2.65722e-05	13	4	3	annual	12	8	0.00024763	6	4	4	half-annual	6	8	0.0180163	7	3	4	arrhythmic	6	12	0.0171659	16	3	5	arrhythmic	15	12	0.00915005	13	10
OG0004347	Lthed_scf0030.1_g122940.1	Qgl_scf0010.1_g053990.1	AT5G47080.1	AT5G47080.1	0.987857	9	3	6	arrhythmic	8	12	0.0628472	23	10	8	arrhythmic	21	7	0.255617	13	3	8	arrhythmic	12	7	8.53481e-06	12	5	5	annual	11	9	0.0218606	13	4	4	arrhythmic	12	1	0.0535382	23	5	15	arrhythmic	21	2	4.35471e-05	12	11
OG0004349	Lthed_scf0060.1_g046890.1	Qgl_scf0090.1_g073260.1	AT1G55150.1	AT1G55150.1	0.076544	14	2	7	arrhythmic	13	11	1.10551e-05	14	4	5	annual	13	1	0.000195365	13	8	10	annual	12	12	0.0788616	14	9	7	arrhythmic	13	12	0.00587188	11	4	4	annual	10	1	0.155274	14	2	7	arrhythmic	13	11	0.7782	17	4
OG0004352	Lthed_scf0120.1_g018930.1	Qgl_scf0120.1_g014590.1	AT5G59180.1	AT5G59180.1	0.00188402	12	12	4	annual	11	9	0.0262865	14	11	6	arrhythmic	13	8	0.0110508	14	1	9	arrhythmic	13	5	0.0738821	7	3	4	arrhythmic	6	7	0.0345637	6	5	3	arrhythmic	6	2	0.294291	23	17	10	arrhythmic	21	1	0.0644014	23	18
OG0004354	Lthed_scf0030.1_g021960.1	Qgl_scf0010.1_g168910.1	AT4G30990.3	AT4G30990.3	2.04507e-05	13	5	4	annual	12	2	3.49409e-09	13	5	4	annual	12	2	0.33102	13	12	1	arrhythmic	12	3	0.00270172	13	11	4	annual	12	2	1.55533e-05	13	4	5	annual	12	1	2.52587e-09	14	4	6	annual	13	1	0.000311809	13	12
OG0004358	Lthed_scf0060.1_g022230.1	Qgl_scf0090.1_g095140.1	AT1G08350.3	AT1G08350.3	0.815025	3	2	1	arrhythmic	3	11	0.319601	10	1	5	arrhythmic	9	10	0.0260671	14	12	13	arrhythmic	13	3	5.75373e-06	13	1	9	annual	12	5	0.00156053	12	8	7	annual	11	5	0.000943401	13	13	3	annual	12	10	0.0740398	7	6
OG0004363	Lthed_scf0110.1_g058020.1	Qgl_scf0110.1_g034490.1	AT2G38660.3	AT2G38660.3	0.544522	13	1	3	arrhythmic	12	10	1.30669e-05	12	1	4	annual	11	10	3.87239e-05	14	3	6	annual	13	7	4.75752e-08	12	5	6	annual	11	9	0.00519234	13	6	2	annual	12	3	0.983867	12	11	5	arrhythmic	11	8	0.000187453	14	3
OG0004364	Lthed_scf0110.1_g060600.1	Qgl_scf0110.1_g032600.1	AT3G56400.1	AT3G56400.1	0.207134	14	10	8	arrhythmic	13	7	0.0237782	14	7	9	arrhythmic	13	4	0.177155	13	3	6	arrhythmic	12	7	5.36321e-06	13	3	7	annual	12	7	0.000609626	14	7	9	annual	13	4	6.22409e-05	13	11	6	annual	12	8	5.31765e-05	15	3
OG0004365	Lthed_scf0110.1_g060930.1	Qgl_scf0110.1_g032250.1	AT3G08760.3	AT3G08760.3	0.000808853	23	16	16	arrhythmic	21	12	0.0809404	23	16	12	arrhythmic	21	12	0.441161	14	9	8	arrhythmic	13	1	0.0761124	12	11	8	arrhythmic	11	2	0.0389014	23	15	16	arrhythmic	21	11	0.153029	23	13	20	arrhythmic	21	10	0.0493388	14	2
OG0004366	Lthed_scf0110.1_g066960.1	Qgl_scf0110.1_g027320.1	AT3G51800.3	AT3G51800.3	8.83839e-06	14	2	8	annual	13	11	5.6613e-07	14	2	9	annual	13	11	1.98512e-06	13	8	8	annual	12	12	1.84267e-06	12	8	7	annual	11	12	0.000662343	12	4	6	annual	11	1	0.384411	10	7	7	arrhythmic	9	4	3.89784e-08	13	10
OG0004367	Lthed_scf0110.1_g067010.1	Qgl_scf0110.1_g027140.1	AT3G51820.1	AT3G51820.1	0.000968983	12	6	2	annual	11	3	0.25273	13	1	11	arrhythmic	12	10	0.00326907	16	1	12	annual	15	5	0.686704	7	7	2	arrhythmic	6	11	0.958612	8	5	7	arrhythmic	7	2	0.536969	12	7	5	arrhythmic	11	4	0.00539026	15	3
OG0004369	Lthed_scf0110.1_g071820.1	Qgl_scf0110.1_g023120.1	AT2G38040.2	AT2G38040.2	0.00316716	13	6	4	annual	12	3	0.00119381	14	1	10	annual	13	10	4.30708e-05	13	10	6	annual	12	1	0.00503392	13	8	7	annual	12	12	0.000316435	6	2	3	half-annual	6	11	0.0136155	7	7	3	arrhythmic	6	4	0.00094153	12	8
OG0004370	Lthed_scf0110.1_g055990.1	Qgl_scf0110.1_g036660.1	AT3G53940.1	AT3G53940.1	0.0925516	6	1	3	arrhythmic	6	10	0.0849084	12	2	10	arrhythmic	11	11	0.0740018	7	2	3	arrhythmic	6	6	0.0629384	19	4	11	arrhythmic	17	8	0.000525106	11	6	3	annual	10	3	0.00066823	13	4	5	annual	12	1	0.00047013	14	12
OG0004371	Lthed_scf0110.1_g099520.1	Qgl_scf0110.1_g000260.1	AT2G37678.1	AT2G37678.1	0.279496	13	9	11	arrhythmic	12	6	0.92187	23	6	17	arrhythmic	21	3	0.203062	11	4	5	arrhythmic	10	8	0.480933	14	3	6	arrhythmic	13	7	0.387578	6	3	3	arrhythmic	6	12	5.93067e-07	12	10	8	annual	11	7	0.000137836	15	8
OG0004373	Lthed_scf0110.1_g095640.1	Qgl_scf0110.1_g004690.1	AT5G02740.1	AT5G02740.1	1.54106e-05	12	1	3	annual	11	10	0.00529001	12	12	8	annual	11	9	0.00626223	14	3	7	annual	13	7	0.0104922	13	3	6	arrhythmic	12	7	0.00679475	12	7	10	annual	11	4	3.35041e-10	13	10	6	annual	12	7	0.0408963	14	12
OG0004374	Lthed_scf0110.1_g095620.1	Qgl_scf0110.1_g004710.1	AT3G58090.1	AT3G58090.1	0.0088705	12	5	8	annual	11	2	0.993177	7	5	2	arrhythmic	6	2	0.103707	14	2	11	arrhythmic	13	6	0.0176585	15	2	6	arrhythmic	14	6	0.00467105	12	6	2	annual	11	3	0.482695	23	8	12	arrhythmic	21	5	2.72523e-05	13	10
OG0004378	Lthed_scf0110.1_g092110.1	Qgl_scf0110.1_g008330.1	AT5G03280.1	AT5G03280.1	0.0028942	20	4	2	arrhythmic	18	1	0.039695	17	16	11	arrhythmic	16	12	0.0408636	13	8	9	arrhythmic	12	12	0.000573777	19	4	6	arrhythmic	17	8	0.00019202	12	4	3	annual	11	1	0.000213459	13	4	4	annual	12	1	6.63939e-05	13	10
OG0004379	Lthed_scf0110.1_g091240.1	Qgl_scf0110.1_g008820.1	AT2G37020.3	AT2G37020.3	0.150636	11	8	7	arrhythmic	10	5	0.000349733	13	13	4	annual	12	10	0.114549	7	1	4	arrhythmic	6	5	0.297298	12	7	3	arrhythmic	11	11	0.424656	6	2	1	arrhythmic	6	11	5.47039e-05	13	8	8	annual	12	5	0.00842982	7	5
OG0004381	Lthed_scf0110.1_g028420.1	Qgl_scf0110.1_g058570.1	AT3G56950.1	AT3G56950.1	0.00592887	12	4	9	annual	11	1	0.13313	13	5	5	arrhythmic	12	2	1.04559e-05	13	11	5	annual	12	2	0.00484559	11	11	6	annual	10	2	0.360769	6	1	5	arrhythmic	6	10	0.000831225	14	10	6	annual	13	7	0.0441297	13	8
OG0004383	Lthed_scf0020.1_g166800.1	Qgl_scf0030.1_g016320.1	AT2G31180.1	AT2G31180.1	0.268589	7	6	3	arrhythmic	6	3	0.248033	7	6	2	arrhythmic	6	3	0.817979	13	7	7	arrhythmic	12	11	0.0259324	12	1	10	arrhythmic	11	5	0.373686	12	11	4	arrhythmic	11	8	0.00022557	12	9	8	annual	11	6	0.146569	9	1
OG0004385	Lthed_scf0020.1_g160900.1	Qgl_scf0030.1_g020540.1	AT1G11480.1	AT1G11480.1	0.005949	21	4	16	arrhythmic	19	1	0.00360854	23	5	12	arrhythmic	21	2	0.132376	20	13	1	arrhythmic	18	4	0.91246	5	4	2	arrhythmic	5	8	0.068266	7	3	3	arrhythmic	6	12	0.0270092	23	5	10	arrhythmic	21	2	0.00660311	14	12
OG0004386	Lthed_scf0020.1_g130300.1	Qgl_scf0030.1_g047330.1	AT1G31310.1	AT2G35640.1	1	2	2	1	arrhythmic	2	11	1	13	12	5	arrhythmic	12	9	1	2	1	1	arrhythmic	2	5	1	2	2	1	arrhythmic	2	6	0.00298448	6	1	3	half-annual	6	10	4.91691e-07	13	10	7	annual	12	7	0.00780352	15	4
OG0004387	Lthed_scf0020.1_g130560.1	Qgl_scf0030.1_g047120.1	AT4G20400.1	AT4G20400.1	1.46846e-05	13	3	10	annual	12	12	5.17239e-09	14	2	8	annual	13	11	2.73291e-05	13	8	10	annual	12	12	0.048184	12	9	5	arrhythmic	11	12	0.0345834	12	3	7	arrhythmic	11	12	1.71082e-08	13	3	8	annual	12	12	0.00346057	15	9
OG0004390	Lthed_scf0020.1_g116430.1	Qgl_scf0030.1_g063140.1	AT2G34480.2	AT2G34480.2	0.0334086	13	1	10	arrhythmic	12	10	0.000191898	14	2	7	annual	13	11	0.0285154	13	9	8	arrhythmic	12	1	0.0831146	14	11	4	arrhythmic	13	2	6.24066e-05	12	8	1	annual	11	5	0.00133553	12	8	5	annual	11	5	0.00140791	13	9
OG0004391	Lthed_scf0020.1_g117690.1	Qgl_scf0030.1_g061750.1	AT2G34560.2	AT2G34560.2	0.0968233	11	8	6	arrhythmic	10	5	0.000503949	12	4	5	annual	11	1	1.84575e-05	15	1	7	annual	14	5	0.0194995	13	3	7	arrhythmic	12	7	0.515732	6	2	4	arrhythmic	6	11	0.613416	15	10	8	arrhythmic	14	7	0.00111185	14	12
OG0004393	Lthed_scf0020.1_g120450.1	Qgl_scf0030.1_g056580.1	AT2G38960.1	AT2G38960.1	0.543032	7	2	4	arrhythmic	6	11	0.688552	8	7	4	arrhythmic	7	4	0.951769	7	1	3	arrhythmic	6	5	0.00532157	13	10	8	annual	12	1	0.252609	20	4	2	arrhythmic	18	1	0.991444	8	8	3	arrhythmic	7	5	2.89332e-05	13	9
OG0004397	Lthed_scf0020.1_g126180.1	Qgl_scf0030.1_g049850.1	AT1G30500.2	AT1G30500.2	0.000208385	14	1	7	annual	13	10	0.000266382	16	15	8	annual	15	11	4.76609e-08	13	7	4	annual	12	11	4.61352e-09	13	6	3	annual	12	10	1.59887e-05	11	2	6	annual	10	11	1.77085e-06	14	14	7	annual	13	10	2.69927e-12	13	5
OG0004399	Lthed_scf0020.1_g142690.1	Qgl_scf0030.1_g037130.1	AT2G35760.1	AT2G35760.1	0.00167677	13	4	8	annual	12	1	4.50284e-06	12	12	9	annual	11	9	0.458221	14	13	12	arrhythmic	13	4	0.383668	20	15	7	arrhythmic	18	6	2.64047e-05	12	4	3	annual	11	1	3.51433e-06	13	4	5	annual	12	1	0.000153967	13	7
OG0004401	Lthed_scf0020.1_g145900.1	Qgl_scf0030.1_g033470.1	AT3G01435.4	AT3G01435.4	0.350683	23	10	13	arrhythmic	21	7	0.0013109	23	10	11	arrhythmic	21	7	0.00570741	13	10	6	annual	12	1	0.165474	19	9	11	arrhythmic	17	12	0.247087	23	2	20	arrhythmic	21	11	0.0617097	23	7	8	arrhythmic	21	4	0.000324403	13	10
OG0004403	Lthed_scf0020.1_g151120.1	Qgl_scf0030.1_g028630.1	AT1G11840.6	AT1G11840.6	0.0084352	12	12	5	annual	11	9	0.00090587	14	9	9	annual	13	6	1.94359e-07	14	3	8	annual	13	7	0.214239	15	3	4	arrhythmic	14	7	0.0015362	10	5	4	annual	9	2	0.000160842	13	3	6	annual	12	12	0.0566168	13	5
OG0004404	Lthed_scf0020.1_g151840.1	Qgl_scf0030.1_g028210.1	AT1G61900.1	AT1G61900.1	0.000413141	13	9	8	annual	12	6	0.15354	16	8	8	arrhythmic	15	5	4.22991e-05	15	1	7	annual	14	5	0.000246114	13	1	9	annual	12	5	0.00643428	12	8	8	annual	11	5	0.000316968	13	11	5	annual	12	8	0.000163923	14	4
OG0004406	Lthed_scf0020.1_g153330.1	Qgl_scf0030.1_g027640.1	AT1G61870.1	AT1G61870.1	0.339911	12	2	1	arrhythmic	11	11	0.0823495	19	14	11	arrhythmic	17	10	0.177836	16	9	5	arrhythmic	15	1	0.100092	16	7	11	arrhythmic	15	11	0.124301	21	19	6	arrhythmic	19	3	0.941214	6	2	2	arrhythmic	6	11	0.253958	7	5
OG0004409	Lthed_scf0080.1_g078550.1	Qgl_scf0070.1_g034810.1	AT1G10180.1	AT1G10180.1	0.0210764	13	6	11	arrhythmic	12	3	0.0389083	14	13	3	arrhythmic	13	10	0.00206151	20	13	13	arrhythmic	18	4	0.65612	14	8	9	arrhythmic	13	12	0.231021	10	9	6	arrhythmic	9	6	0.0493388	13	1	2	arrhythmic	12	10	0.875839	13	7
OG0004411	Lthed_scf0020.1_g104260.1	Qgl_scf0030.1_g078850.1	AT4G18640.1	AT5G45840.1	0.268678	23	9	21	arrhythmic	21	6	0.0988156	13	11	11	arrhythmic	12	8	0.000254065	14	13	13	annual	13	4	0.853924	5	4	3	arrhythmic	5	8	0.057404	12	2	3	arrhythmic	11	11	0.0265026	12	1	4	arrhythmic	11	10	0.0239753	13	7
OG0004414	Lthed_scf0020.1_g101020.1	Qgl_scf0030.1_g081210.1	AT4G18570.1	AT4G18570.1	1	14	10	4	arrhythmic	13	7	0.000264329	14	11	8	annual	13	8	9.69036e-06	13	1	8	annual	12	5	0.000431195	12	3	9	annual	11	7	0.00729781	6	1	4	half-annual	6	10	1.24268e-07	13	10	6	annual	12	7	0.0633926	15	4
OG0004415	Lthed_scf0020.1_g092500.1	Qgl_scf0030.1_g089410.1	AT4G28500.1	AT4G28500.1	0.0243839	7	2	4	arrhythmic	6	11	0.642455	15	9	6	arrhythmic	14	6	9.99342e-06	13	1	9	annual	12	5	0.0030089	17	13	5	annual	16	4	0.00264134	11	2	6	annual	10	11	0.000102674	13	1	4	annual	12	10	3.80009e-05	14	1
OG0004419	Lthed_scf0110.1_g029380.1	Qgl_scf0110.1_g057260.1	AT5G65180.1	AT5G65180.1	5.7169e-05	19	19	6	arrhythmic	17	3	0.360443	22	21	6	arrhythmic	20	5	0.034186	14	5	8	arrhythmic	13	9	0.290007	21	3	7	arrhythmic	19	7	0.00254801	14	4	3	annual	13	1	0.531745	11	3	7	arrhythmic	10	12	0.0034354	13	10
OG0004420	Lthed_scf0110.1_g029270.1	Qgl_scf0110.1_g057330.1	AT5G17910.3	AT5G17910.3	0.108387	7	1	4	arrhythmic	6	10	0.0855244	16	1	8	arrhythmic	15	10	0.132644	14	13	4	arrhythmic	13	4	0.174918	7	7	3	arrhythmic	6	11	0.962887	6	2	5	arrhythmic	6	11	0.222228	23	19	14	arrhythmic	21	3	0.00171532	13	8
OG0004423	Lthed_scf0110.1_g021910.1	Qgl_scf0110.1_g063860.1	AT5G05140.1	AT5G05140.1	0.0798447	13	3	11	arrhythmic	12	12	4.21355e-05	14	4	11	annual	13	1	0.0542273	7	3	3	arrhythmic	6	7	0.00117858	11	11	5	annual	10	2	0.0151994	12	3	10	arrhythmic	11	12	0.0728489	13	3	11	arrhythmic	12	12	0.068933	15	9
OG0004424	Lthed_scf0110.1_g020160.1	Qgl_scf0110.1_g065490.1	AT3G56750.1	AT3G56750.1	0.00192876	12	10	5	annual	11	7	7.27031e-06	12	12	6	annual	11	9	0.0271859	7	7	4	arrhythmic	6	11	0.000286155	12	3	8	annual	11	7	0.0267191	6	1	4	arrhythmic	6	10	0.0177398	14	13	4	arrhythmic	13	10	0.0381045	14	5
OG0004425	Lthed_scf0110.1_g019090.1	Qgl_scf0110.1_g067010.1	AT3G12250.7	AT3G12250.7	0.526888	13	3	10	arrhythmic	12	12	2.23871e-07	13	3	10	annual	12	12	8.24753e-06	13	11	3	annual	12	2	0.00809527	12	9	10	annual	11	12	0.00120274	12	4	3	annual	11	1	4.93088e-07	13	4	6	annual	12	1	0.0449825	7	3
OG0004426	Lthed_scf0110.1_g013550.1	Qgl_scf0110.1_g073380.1	AT5G04060.1	AT5G04060.1	0.00136026	13	9	10	annual	12	6	1.85658e-08	13	12	5	annual	12	9	0.000177772	14	13	13	annual	13	4	1.90791e-05	12	3	8	annual	11	7	0.0345532	12	8	9	arrhythmic	11	5	0.000629004	12	8	10	annual	11	5	0.0501021	7	6
OG0004428	Lthed_scf0110.1_g002360.1	Qgl_scf0110.1_g081490.1	AT2G41680.1	AT2G41680.1	0.00117588	14	5	3	annual	13	2	0.000374586	12	4	5	annual	11	1	0.01211	14	10	2	arrhythmic	13	1	6.0666e-09	13	8	9	annual	12	12	0.0611029	13	2	8	arrhythmic	12	11	0.0632536	13	8	1	arrhythmic	12	5	0.000425877	13	12
OG0004429	Lthed_scf0110.1_g001730.1	Qgl_scf0110.1_g082510.1	AT2G41740.2	AT2G41740.2	0.00232617	14	8	6	annual	13	5	0.88194	3	3	1	arrhythmic	3	12	0.0220641	13	1	1	arrhythmic	12	5	0.0161541	13	8	10	arrhythmic	12	12	7.40451e-06	12	8	7	annual	11	5	9.58752e-07	13	11	7	annual	12	8	2.1059e-05	14	12
OG0004430	Lthed_scf0110.1_g040230.1	Qgl_scf0110.1_g049100.1	AT3G57550.2	AT3G57550.2	0.00993367	6	3	3	half-annual	6	12	0.00067116	14	1	8	annual	13	10	0.0679749	13	11	7	arrhythmic	12	2	0.00376592	14	8	8	annual	13	12	0.00176668	6	2	3	half-annual	6	11	4.63582e-05	14	13	4	annual	13	10	0.2461	6	2
OG0004431	Lthed_scf0110.1_g041700.1	Qgl_scf0110.1_g047730.1	AT3G20860.1	AT3G20860.1	0.118206	12	10	3	arrhythmic	11	7	0.000588479	12	12	5	annual	11	9	0.000254827	15	13	5	annual	14	4	0.038854	7	7	3	arrhythmic	6	11	0.63431	10	2	6	arrhythmic	9	11	7.13893e-05	12	1	3	annual	11	10	0.00235366	14	13
OG0004434	Lthed_scf0110.1_g047360.1	Qgl_scf0110.1_g044610.1	AT3G12120.2	AT3G12120.2	0.00623332	14	14	8	annual	13	10	0.0984787	21	21	2	arrhythmic	19	5	0.288953	7	6	4	arrhythmic	6	10	5.3337e-06	15	4	9	annual	14	8	0.0311082	14	13	8	arrhythmic	13	10	2.8423e-07	14	2	9	annual	13	11	0.458353	22	7
OG0004435	Lthed_scf0110.1_g048260.1	Qgl_scf0110.1_g044160.1	AT2G42040.1	AT2G42040.1	0.355251	12	3	10	arrhythmic	11	12	0.0145126	12	6	7	arrhythmic	11	3	0.313631	7	5	4	arrhythmic	6	9	0.00121307	17	15	7	annual	16	6	0.34975	5	5	3	arrhythmic	5	2	0.314885	7	4	3	arrhythmic	6	1	0.0364076	22	4
OG0004437	Lthed_scf0110.1_g050920.1	Qgl_scf0110.1_g041400.1	AT3G58470.1	AT3G58470.1	0.00983885	6	2	2	half-annual	6	11	0.138418	15	3	4	arrhythmic	14	12	2.12326e-06	14	9	8	annual	13	1	0.00533259	13	7	3	annual	12	11	0.0129617	13	5	8	arrhythmic	12	2	0.635385	7	3	3	arrhythmic	6	12	3.94378e-05	14	9
OG0004438	Lthed_scf0110.1_g051900.1	Qgl_scf0110.1_g040710.1	AT2G35840.4	AT2G35840.4	2.16047e-06	13	7	1	annual	12	4	5.34621e-08	13	5	6	annual	12	2	0.0132225	12	10	5	arrhythmic	11	1	0.000294069	13	10	4	annual	12	1	1.32156e-06	13	3	8	annual	12	12	4.1741e-10	13	5	6	annual	12	2	0.00368703	14	8
OG0004440	Lthed_scf0110.1_g076920.1	Qgl_scf0110.1_g018660.1	AT3G15040.1	AT3G15040.1	0.00241609	12	12	4	annual	11	9	0.0379946	13	13	4	arrhythmic	12	10	1.3956e-05	14	3	7	annual	13	7	0.325926	7	4	4	arrhythmic	6	8	9.15629e-05	13	11	5	annual	12	8	0.00159265	13	11	7	annual	12	8	2.65573e-05	14	3
OG0004441	Lthed_scf0110.1_g077140.1	Qgl_scf0110.1_g018500.1	AT5G06140.1	AT5G06140.1	0.123268	19	1	7	arrhythmic	17	10	0.000233072	13	4	7	annual	12	1	0.0312855	14	12	1	arrhythmic	13	3	0.00121935	16	13	1	annual	15	4	0.0071411	17	2	7	annual	16	11	4.98318e-06	15	1	7	annual	14	10	3.02273e-05	13	11
OG0004443	Lthed_scf0110.1_g078140.1	Qgl_scf0110.1_g017750.1	AT2G36230.1	AT2G36230.1	0.147976	13	1	2	arrhythmic	12	10	0.000163299	13	12	7	annual	12	9	0.997597	12	8	7	arrhythmic	11	12	0.00242451	12	8	2	annual	11	12	0.0119289	22	2	16	arrhythmic	20	11	9.48365e-07	13	12	6	annual	12	9	0.598165	15	11
OG0004445	Lthed_scf0110.1_g010860.1	Qgl_scf0110.1_g075160.1	AT5G03960.1	AT5G03960.1	1	20	8	16	arrhythmic	18	5	0.137467	13	11	7	arrhythmic	12	8	0.0180299	13	1	9	arrhythmic	12	5	0.218933	13	3	5	arrhythmic	12	7	0.00105076	12	8	9	annual	11	5	2.72712e-07	14	9	8	annual	13	6	0.000264981	13	13
OG0004458	Lthed_scf0020.1_g138980.1	Qgl_scf0030.1_g040400.1	AT4G34160.1	AT5G67260.1	1	6	3	3	arrhythmic	6	12	0.999997	10	1	2	arrhythmic	9	10	1	14	13	7	arrhythmic	13	4	1	3	1	1	arrhythmic	3	5	0.981346	7	2	3	arrhythmic	6	11	0.00551965	12	12	4	annual	11	9	0.840554	15	3
OG0004462	Lthed_scf0020.1_g113910.1	Qgl_scf0030.1_g065550.1	AT1G29850.1	AT1G29850.1	0.231331	12	7	4	arrhythmic	11	4	0.35354	13	3	8	arrhythmic	12	12	0.193811	7	7	5	arrhythmic	6	11	0.0154117	23	9	14	arrhythmic	21	12	0.0319775	20	16	9	arrhythmic	18	12	0.410053	23	11	13	arrhythmic	21	8	0.981012	7	7
OG0004463	Lthed_scf0020.1_g113310.1	Qgl_scf0030.1_g065900.1	AT5G46410.2	AT5G46410.2	0.0718019	14	7	1	arrhythmic	13	4	6.60498e-05	12	7	5	annual	11	4	0.1506	14	12	1	arrhythmic	13	3	2.07627e-05	12	10	8	annual	11	1	0.0109931	12	4	8	arrhythmic	11	1	1.659e-06	13	4	6	annual	12	1	0.0158761	7	3
OG0004464	Lthed_scf0020.1_g110880.1	Qgl_scf0030.1_g067540.1	AT4G18975.2	AT4G18975.4	0.088837	17	7	9	arrhythmic	16	4	8.87351e-06	14	11	4	annual	13	8	0.00159495	12	11	4	annual	11	2	0.0479817	13	12	11	arrhythmic	12	3	0.222673	19	4	11	arrhythmic	17	1	0.000934649	13	5	3	annual	12	2	0.0402462	19	16
OG0004469	Lthed_scf0020.1_g170110.1	Qgl_scf0030.1_g013910.1	AT4G21540.1	AT4G21540.1	0.70266	4	3	2	arrhythmic	4	12	0.000548726	12	5	7	annual	11	2	0.00217208	14	3	5	annual	13	7	0.00339924	15	15	9	annual	14	6	0.924011	11	3	5	arrhythmic	10	12	0.141943	15	1	7	arrhythmic	14	10	0.500262	21	14
OG0004471	Lthed_scf0110.1_g029490.1	Qgl_scf0110.1_g057180.1	AT5G17700.2	AT5G17700.2	0.422268	7	1	5	arrhythmic	6	10	0.00046744	15	12	11	annual	14	9	0.0349771	23	14	7	arrhythmic	21	5	0.000139256	13	7	6	annual	12	11	0.0526364	13	2	7	arrhythmic	12	11	0.030071	12	12	5	arrhythmic	11	9	0.024325	10	10
OG0004472	Lthed_scf0110.1_g030260.1	Qgl_scf0110.1_g056710.1	AT1G08710.1	AT1G08710.2	0.00788161	15	4	8	annual	14	1	3.33684e-08	13	3	9	annual	12	12	0.11695	14	10	3	arrhythmic	13	1	0.700338	10	2	2	arrhythmic	9	6	0.046921	12	4	4	arrhythmic	11	1	0.0100935	13	3	6	arrhythmic	12	12	0.00218489	14	10
OG0004473	Lthed_scf0110.1_g032880.1	Qgl_scf0110.1_g054350.1	AT5G39890.1	AT5G39890.1	0.713658	12	6	5	arrhythmic	11	3	2.54447e-05	13	3	10	annual	12	12	0.97475	17	7	7	arrhythmic	16	11	9.28322e-06	12	11	3	annual	11	2	9.15882e-05	13	3	8	annual	12	12	0.76622	9	3	8	arrhythmic	8	12	0.838214	8	4
OG0004474	Lthed_scf0110.1_g089340.1	Qgl_scf0110.1_g009990.1	AT5G03420.1	AT5G03420.1	0.00270625	12	11	5	annual	11	8	6.48839e-05	13	10	7	annual	12	7	0.00124287	14	3	6	annual	13	7	0.000112671	12	4	6	annual	11	8	0.201588	13	4	7	arrhythmic	12	1	0.0935533	15	3	7	arrhythmic	14	12	0.190519	6	4
OG0004475	Lthed_scf0110.1_g095850.1	Qgl_scf0110.1_g004390.1	AT3G53500.2	AT3G53500.2	2.6321e-06	12	4	7	annual	11	1	1.19388e-05	13	3	8	annual	12	12	0.000540469	15	9	9	annual	14	1	0.180573	11	11	3	arrhythmic	10	2	5.15267e-07	12	3	8	annual	11	12	0.088442	12	4	8	arrhythmic	11	1	9.23867e-05	15	9
OG0004477	Lthed_scf0110.1_g097680.1	Qgl_scf0110.1_g001900.1	AT3G53710.3	AT3G53710.3	0.485734	7	1	4	arrhythmic	6	10	0.320409	20	4	9	arrhythmic	18	1	0.0427696	18	14	1	arrhythmic	17	5	0.0790316	20	13	13	arrhythmic	18	4	0.0484301	23	9	9	arrhythmic	21	6	0.0423826	16	9	10	arrhythmic	15	6	0.270033	7	6
OG0004479	Lthed_scf0110.1_g069170.1	Qgl_scf0110.1_g025270.1	AT5G01260.3	AT5G01260.3	0.00054335	12	12	6	annual	11	9	0.536768	7	2	3	arrhythmic	6	11	0.119844	6	4	3	arrhythmic	6	8	0.240765	7	2	5	arrhythmic	6	6	0.00179116	11	5	3	annual	10	2	6.16002e-08	13	2	10	annual	12	11	0.000469838	14	10
OG0004480	Lthed_scf0110.1_g060620.1	Qgl_scf0110.1_g032580.1	AT5G43180.1	AT5G43180.1	1	2	2	1	arrhythmic	2	11	0.538489	7	5	4	arrhythmic	6	2	0.0301713	13	1	5	arrhythmic	12	5	0.000582602	13	12	11	annual	12	3	0.0034412	13	8	8	annual	12	5	2.40572e-05	13	12	4	annual	12	9	0.0882279	12	3
OG0004483	Lthed_scf0070.1_g009970.1	Qgl_scf0080.1_g008580.1	AT1G67580.2	AT1G67580.2	0.0284484	18	7	6	arrhythmic	17	4	0.0233491	23	9	3	arrhythmic	21	6	0.983995	8	2	5	arrhythmic	7	6	0.792752	6	6	3	arrhythmic	6	10	0.0615612	21	2	13	arrhythmic	19	11	2.02002e-05	13	4	6	annual	12	1	0.016041	14	11
OG0004485	Lthed_scf0070.1_g023190.1	Qgl_scf0080.1_g017630.1	AT5G62840.1	AT5G62840.1	0.000835165	13	11	6	annual	12	8	0.000604581	13	13	4	annual	12	10	5.12305e-05	14	1	10	annual	13	5	1.14935e-06	12	5	5	annual	11	9	0.0722632	12	10	6	arrhythmic	11	7	0.982254	7	1	2	arrhythmic	6	10	0.000153267	13	5
OG0004487	Lthed_scf0070.1_g001730.1	Qgl_scf0080.1_g000330.1	AT5G07360.3	AT5G07360.3	8.6823e-05	12	4	8	annual	11	1	0.157617	11	11	2	arrhythmic	10	8	0.0340705	23	14	20	arrhythmic	21	5	0.139301	13	8	8	arrhythmic	12	12	0.000248202	13	4	6	annual	12	1	0.0109477	14	1	8	arrhythmic	13	10	0.0026106	23	17
OG0004491	Lthed_scf0070.1_g036100.1	Qgl_scf0080.1_g030150.1	AT5G07810.1	AT5G07810.1	1.56714e-06	13	4	7	annual	12	1	1.09802e-07	13	4	6	annual	12	1	0.00896904	13	12	3	annual	12	3	8.14628e-05	12	1	3	annual	11	5	6.75763e-05	12	8	2	annual	11	5	0.00974529	13	3	11	annual	12	12	0.000444572	12	12
OG0004495	Lthed_scf0030.1_g012120.1	Qgl_scf0010.1_g179420.1	AT1G16445.1	AT1G16445.1	0.231117	14	1	8	arrhythmic	13	10	0.0028404	14	11	6	annual	13	8	0.02369	13	4	7	arrhythmic	12	8	1.35638e-06	12	5	5	annual	11	9	0.767605	13	5	6	arrhythmic	12	2	5.10433e-05	12	12	4	annual	11	9	0.106586	23	8
OG0004514	Lthed_scf0040.1_g087290.1	Qgl_scf0050.1_g049180.1	AT3G15190.1	AT3G15190.1	0.39471	13	9	8	arrhythmic	12	6	0.000533062	13	13	4	annual	12	10	0.0010578	14	5	5	annual	13	9	0.0696015	12	7	3	arrhythmic	11	11	0.025373	12	6	10	arrhythmic	11	3	0.324717	12	8	8	arrhythmic	11	5	0.366315	3	1
OG0004516	Lthed_scf0040.1_g104300.1	Qgl_scf0050.1_g037370.1	AT5G54310.1	AT5G54310.1	0.0125451	14	3	5	arrhythmic	13	12	0.037659	13	3	10	arrhythmic	12	12	0.126588	7	3	3	arrhythmic	6	7	0.211103	13	11	1	arrhythmic	12	2	0.000480141	13	5	3	annual	12	2	1.22614e-08	13	4	7	annual	12	1	1.64547e-06	14	10
OG0004517	Lthed_scf0040.1_g106690.1	Qgl_scf0050.1_g034800.1	AT4G27310.1	AT4G27310.1	0.975305	4	3	2	arrhythmic	4	12	0.0380879	12	8	4	arrhythmic	11	5	0.0258724	14	12	1	arrhythmic	13	3	0.998731	12	12	2	arrhythmic	11	3	0.175018	9	6	4	arrhythmic	8	3	0.00117109	13	3	9	annual	12	12	0.0184339	14	11
OG0004519	Lthed_scf0040.1_g116700.1	Qgl_scf0050.1_g025050.1	AT3G20500.1	AT3G20500.1	2.71485e-07	13	9	8	annual	12	6	9.22684e-06	12	12	4	annual	11	9	0.258999	12	5	4	arrhythmic	11	9	0.00837063	6	4	3	half-annual	6	8	0.00113124	12	12	8	annual	11	9	0.000445462	13	1	10	annual	12	10	0.33322	8	7
OG0004520	Lthed_scf0040.1_g119500.1	Qgl_scf0050.1_g021750.1	AT4G26900.1	AT4G26900.1	0.00392759	13	12	5	annual	12	9	0.0706698	23	7	6	arrhythmic	21	4	0.00259533	15	2	6	annual	14	6	0.411321	23	5	16	arrhythmic	21	9	3.94789e-05	13	6	12	annual	12	3	0.012022	13	9	10	arrhythmic	12	6	0.3484	8	2
OG0004524	Lthed_scf0020.1_g139520.1	Qgl_scf0030.1_g040100.1	AT4G26485.1	AT4G26485.1	0.113539	21	14	10	arrhythmic	19	10	0.000327341	15	8	9	annual	14	5	0.00190746	14	1	8	annual	13	5	0.000258976	12	2	9	annual	11	6	1.88665e-05	12	11	5	annual	11	8	0.0241107	17	6	16	arrhythmic	16	3	0.00049265	17	14
OG0004530	Lthed_scf0090.1_g001770.1	Qgl_scf0060.1_g115330.1	AT4G10110.1	AT4G10110.1	0.0464664	23	12	3	arrhythmic	21	9	0.0014435	23	11	3	arrhythmic	21	8	6.17491e-05	14	5	5	annual	13	9	1.13098e-07	13	5	3	annual	12	9	0.982239	7	3	3	arrhythmic	6	12	0.00322571	23	5	15	arrhythmic	21	2	0.0548272	14	2
OG0004531	Lthed_scf0010.1_g047230.1	Qgl_scf0020.1_g045120.1	AT3G28460.1	AT3G28460.1	0.000973441	15	5	3	annual	14	2	0.00841796	15	1	9	annual	14	10	2.11499e-06	12	10	6	annual	11	1	9.6801e-07	13	9	8	annual	12	12	0.144242	13	8	1	arrhythmic	12	5	0.00416608	12	7	5	annual	11	4	7.85639e-09	13	11
OG0004532	Lthed_scf0010.1_g049400.1	Qgl_scf0020.1_g047750.1	AT3G01370.1	AT3G01370.1	7.15162e-06	13	13	3	annual	12	10	0.862561	5	3	2	arrhythmic	5	12	0.648457	23	17	10	arrhythmic	21	8	0.869441	6	2	2	arrhythmic	6	6	0.154041	12	2	1	arrhythmic	11	11	0.100542	13	4	5	arrhythmic	12	1	0.00536692	12	10
OG0004534	Lthed_scf0010.1_g052820.1	Qgl_scf0020.1_g051850.1	AT5G40270.1	AT5G40270.1	0.161326	12	11	1	arrhythmic	11	8	0.000165987	13	10	6	annual	12	7	0.0343971	23	15	20	arrhythmic	21	6	0.313051	6	1	3	arrhythmic	6	5	0.369724	20	6	1	arrhythmic	18	3	0.179927	23	18	16	arrhythmic	21	2	0.00011557	13	10
OG0004540	Lthed_scf0010.1_g099040.1	Qgl_scf0020.1_g094270.1	AT5G16040.1	AT3G02510.1	1.38333e-07	14	11	6	annual	13	8	7.06774e-09	14	9	9	annual	13	6	6.31214e-09	13	4	5	annual	12	8	2.24622e-06	13	3	6	annual	12	7	1.06415e-07	13	10	6	annual	12	7	6.98805e-08	13	10	7	annual	12	7	0.0626151	12	3
OG0004542	Lthed_scf0080.1_g103170.1	Qgl_scf0070.1_g009230.1	AT1G77360.2	AT1G77360.2	0.00167628	22	11	20	arrhythmic	20	8	0.000262545	14	9	11	annual	13	6	0.35383	14	5	5	arrhythmic	13	9	4.63456e-05	13	5	3	annual	12	9	0.143669	13	3	4	arrhythmic	12	12	0.00358755	13	13	5	annual	12	10	0.00249031	14	3
OG0004544	Lthed_scf0010.1_g072380.1	Qgl_scf0020.1_g069260.1	AT3G29760.5	AT3G29760.5	0.00371313	13	2	10	annual	12	11	2.07375e-08	14	3	8	annual	13	12	0.00161818	14	8	9	annual	13	12	0.0201279	12	10	5	arrhythmic	11	1	3.50793e-10	12	4	8	annual	11	1	6.80231e-08	13	3	9	annual	12	12	0.00039818	14	9
OG0004545	Lthed_scf0010.1_g071820.1	Qgl_scf0020.1_g068970.1	AT3G29390.1	AT3G29390.1	0.473296	13	12	2	arrhythmic	12	9	5.17616e-05	12	11	5	annual	11	8	0.251575	8	1	4	arrhythmic	7	5	0.157317	20	6	1	arrhythmic	18	10	0.0562628	13	11	3	arrhythmic	12	8	0.579949	8	4	6	arrhythmic	7	1	0.477521	16	1
OG0004547	Lthed_scf0090.1_g032070.1	Qgl_scf0060.1_g077820.1	AT4G25280.2	AT4G25280.2	0.0241963	11	6	7	arrhythmic	10	3	0.171429	13	2	11	arrhythmic	12	11	0.65694	13	9	7	arrhythmic	12	1	0.870099	6	1	4	arrhythmic	6	5	0.00362786	12	5	7	annual	11	2	0.000616913	13	5	5	annual	12	2	0.000139151	16	9
OG0004549	Lthed_scf0090.1_g026790.1	Qgl_scf0060.1_g086380.1	AT4G25540.1	AT4G25540.1	0.002834	14	4	6	annual	13	1	0.0784931	19	18	8	arrhythmic	17	2	0.103079	23	22	5	arrhythmic	21	1	0.0120924	14	8	10	arrhythmic	13	12	0.00718385	14	4	4	annual	13	1	0.503386	7	6	2	arrhythmic	6	3	0.115158	13	12
OG0004552	Lthed_scf0050.1_g023360.1	Qgl_scf0040.1_g029590.1	AT1G30680.1	AT1G30680.1	0.0231396	12	7	1	arrhythmic	11	4	0.187924	16	3	9	arrhythmic	15	12	0.993129	5	5	3	arrhythmic	5	9	0.0528563	23	2	8	arrhythmic	21	6	0.127677	11	3	5	arrhythmic	10	12	0.058616	13	11	6	arrhythmic	12	8	0.282002	12	11
OG0004560	Lthed_scf0070.1_g090500.1	Qgl_scf0080.1_g083960.1		AT1G03530.1	0.0526797	12	2	9	arrhythmic	11	11	2.75696e-06	12	2	7	annual	11	11	0.374665	6	4	3	arrhythmic	6	8	0.00050037	17	6	7	annual	16	10	0.00358837	11	4	6	annual	10	1	0.000192574	12	4	7	annual	11	1	0.00014277	13	11
OG0004561	Lthed_scf0040.1_g053970.1	Qgl_scf0050.1_g079680.1	AT2G20710.1	AT2G20710.1	0.224305	20	13	11	arrhythmic	18	10	0.982336	14	12	13	arrhythmic	13	9	0.0481877	15	2	9	arrhythmic	14	6	0.00010459	12	6	6	annual	11	10	0.199146	12	6	10	arrhythmic	11	3	0.116814	10	10	2	arrhythmic	9	7	0.279341	13	8
OG0004565	Lthed_scf0080.1_g104130.1	Qgl_scf0070.1_g007470.1	AT3G43520.1	AT3G43520.1	0.0366786	10	4	5	arrhythmic	9	1	0.0394506	13	5	6	arrhythmic	12	2	9.60847e-05	14	11	2	annual	13	2	8.47979e-10	12	10	5	annual	11	1	0.264298	7	3	3	arrhythmic	6	12	0.0624781	14	3	10	arrhythmic	13	12	1.12854e-05	13	10
OG0004566	Lthed_scf0080.1_g104480.1	Qgl_scf0070.1_g007230.1	AT4G33150.4	AT4G33150.4	0.166578	10	9	6	arrhythmic	9	6	0.214994	14	3	5	arrhythmic	13	12	0.533978	7	4	6	arrhythmic	6	8	0.00384476	13	13	7	annual	12	4	0.0948089	19	6	18	arrhythmic	17	3	0.0328101	13	9	6	arrhythmic	12	6	3.84502e-06	15	15
OG0004567	Lthed_scf0080.1_g106820.1	Qgl_scf0070.1_g003780.1	AT2G05830.1	AT2G05830.1	0.00286612	13	12	4	annual	12	9	5.65268e-07	14	9	9	annual	13	6	2.01781e-05	14	3	6	annual	13	7	1.99729e-07	12	5	5	annual	11	9	0.00175306	6	5	3	half-annual	6	2	5.97059e-05	13	9	7	annual	12	6	8.35418e-09	13	2
OG0004568	Lthed_scf0080.1_g106840.1	Qgl_scf0070.1_g003760.1	AT3G51420.1	AT3G51420.1	0.70302	7	6	3	arrhythmic	6	3	0.0114511	13	11	6	arrhythmic	12	8	0.467337	14	5	8	arrhythmic	13	9	0.00871736	10	7	7	annual	9	11	0.0719639	13	4	11	arrhythmic	12	1	0.0113374	13	7	8	arrhythmic	12	4	0.137101	13	11
OG0004578	Lthed_scf0090.1_g081600.1	Qgl_scf0060.1_g030790.1	AT2G20310.1	AT2G20310.1	0.058041	13	7	2	arrhythmic	12	4	0.0122169	23	20	6	arrhythmic	21	4	0.117241	7	5	5	arrhythmic	6	9	0.0237221	12	1	8	arrhythmic	11	5	0.0700843	23	16	21	arrhythmic	21	12	0.303147	22	5	2	arrhythmic	20	2	0.30043	16	2
OG0004624	Lthed_scf0020.1_g025900.1	Qgl_scf0030.1_g162100.1	AT4G13750.1	AT4G13750.1	0.353873	13	11	7	arrhythmic	12	8	0.00412168	14	11	5	annual	13	8	2.44209e-06	14	13	11	annual	13	4	0.000508216	13	5	3	annual	12	9	1.2942e-05	12	10	5	annual	11	7	2.46846e-07	14	9	7	annual	13	6	0.0051062	12	3
OG0004670	Lthed_scf0040.1_g028590.1	Qgl_scf0050.1_g109040.1	AT3G14470.2	AT3G14470.2	0.0201196	14	7	1	arrhythmic	13	4	0.00587121	11	8	4	annual	10	5	0.939898	9	7	6	arrhythmic	8	11	0.294171	6	1	2	arrhythmic	6	5	0.0837925	16	7	9	arrhythmic	15	4	0.234284	20	6	10	arrhythmic	18	3	0.00204744	12	4
OG0004721	Lthed_scf0090.1_g010810.1	Qgl_scf0060.1_g106800.1	AT5G17540.1	AT5G17540.1	1.23946e-07	13	11	6	annual	12	8	0.000113509	14	9	7	annual	13	6	0.13655	13	5	3	arrhythmic	12	9	3.52997e-06	13	2	7	annual	12	6	0.00754969	13	9	6	annual	12	6	0.154987	6	6	3	arrhythmic	6	3	0.00082943	13	7
OG0004732	Lthed_scf0100.1_g030250.1	Qgl_scf0100.1_g076320.1	AT3G23170.1	AT3G23170.1	0.275737	6	6	3	arrhythmic	6	3	0.704204	7	6	4	arrhythmic	6	3	0.101235	22	4	9	arrhythmic	20	8	0.00070252	12	4	5	annual	11	8	0.0823976	6	6	3	arrhythmic	6	3	0.828961	8	5	7	arrhythmic	7	2	0.280887	12	4
OG0004733	Lthed_scf0100.1_g032430.1	Qgl_scf0100.1_g073620.1			1	16	1	7	arrhythmic	15	10	6.45838e-06	16	16	8	annual	15	12	0.000599431	13	10	6	annual	12	1	0.000725197	14	10	5	annual	13	1	2.80051e-07	12	4	4	annual	11	1	2.62128e-08	13	3	7	annual	12	12	5.29468e-09	14	10
OG0004830	Lthed_scf0030.1_g057950.1	Qgl_scf0010.1_g131180.1	AT2G43020.1	AT2G43020.1	0.689532	7	2	4	arrhythmic	6	11	0.00255161	13	4	9	annual	12	1	0.0172092	12	12	5	arrhythmic	11	3	0.0741565	13	9	11	arrhythmic	12	12	0.838705	4	3	2	arrhythmic	4	12	0.0698489	15	6	8	arrhythmic	14	3	0.0351449	13	1
OG0004831	Lthed_scf0070.1_g017000.1	Qgl_scf0080.1_g012540.1	AT4G24715.1	AT5G50200.3	0.963806	12	2	6	arrhythmic	11	11	0.248049	6	2	4	arrhythmic	6	11	6.41882e-05	14	9	8	annual	13	1	2.27699e-06	13	5	6	annual	12	9	0.0356738	15	2	6	arrhythmic	14	11	0.118929	12	2	6	arrhythmic	11	11	0.752274	23	10
OG0004832	Lthed_scf0060.1_g011000.1	Qgl_scf0090.1_g113910.1	AT1G23000.1	AT1G23000.1	0.260877	7	2	5	arrhythmic	6	11	0.000123224	14	2	7	annual	13	11	0.00363831	13	13	10	annual	12	4	0.373371	23	15	9	arrhythmic	21	6	0.000419917	6	1	4	half-annual	6	10	0.0640613	13	10	7	arrhythmic	12	7	0.478282	7	5
OG0004834	Lthed_scf0090.1_g051510.1	Qgl_scf0060.1_g062680.1	AT4G17500.1	AT4G17500.1	0.0223986	13	3	5	arrhythmic	12	12	0.0117113	12	3	8	arrhythmic	11	12	0.000964564	15	9	6	annual	14	1	3.16192e-05	13	8	4	annual	12	12	2.26967e-05	12	3	5	annual	11	12	1.79865e-05	13	3	2	annual	12	12	0.00202767	14	10
OG0004835	Lthed_scf0110.1_g070430.1	Qgl_scf0110.1_g024060.1	AT2G38110.1	AT2G38110.1	1	14	9	5	arrhythmic	13	6	0.00851869	13	11	7	annual	12	8	1	15	11	12	arrhythmic	14	2	1	12	3	9	arrhythmic	11	7	0.00264595	6	2	3	half-annual	6	11	1.01464e-06	13	11	6	annual	12	8	0.488811	7	6
OG0004838	Lthed_scf0050.1_g087150.1	Qgl_scf0040.1_g095410.1	AT5G43700.1	AT5G43700.1	0.517425	13	6	1	arrhythmic	12	3	1	6	6	3	arrhythmic	6	3	0.01939	7	7	3	arrhythmic	6	11	0.101719	23	14	11	arrhythmic	21	5	0.399176	13	10	2	arrhythmic	12	7	0.942742	11	5	5	arrhythmic	10	2	2.888e-05	13	1
OG0004840	Lthed_scf0120.1_g009380.1	Qgl_scf0120.1_g008080.1	AT4G17895.1	AT4G17895.1	0.162233	7	1	3	arrhythmic	6	10	0.238711	23	1	2	arrhythmic	21	10	0.347639	13	1	8	arrhythmic	12	5	0.000587366	16	14	10	annual	15	5	0.0685549	10	9	5	arrhythmic	9	6	5.55014e-05	13	10	7	annual	12	7	0.0953827	14	12
OG0004841	Lthed_scf0110.1_g020060.1	Qgl_scf0110.1_g065620.1	AT3G56720.3	AT3G56720.3	0.796867	12	11	5	arrhythmic	11	8	1.10579e-05	14	11	5	annual	13	8	2.85956e-05	13	4	9	annual	12	8	1.78914e-05	13	3	9	annual	12	7	0.00817621	7	4	2	half-annual	6	1	0.0160522	13	10	9	arrhythmic	12	7	0.468319	13	12
OG0004842	Lthed_scf0060.1_g032730.1	Qgl_scf0090.1_g085290.1	AT1G50420.1	AT1G50420.1	0.0593983	13	4	2	arrhythmic	12	1	0.222099	12	11	9	arrhythmic	11	8	5.56746e-05	15	8	4	annual	14	12	0.00252312	13	10	3	annual	12	1	0.142645	10	3	7	arrhythmic	9	12	8.08288e-05	13	4	2	annual	12	1	0.00017925	14	10
OG0004844	Lthed_scf0080.1_g078360.1	Qgl_scf0070.1_g034960.1	AT5G45100.1	AT5G45100.1	0.00235341	7	3	3	half-annual	6	12	0.00765173	7	2	5	half-annual	6	11	0.0034822	14	10	3	annual	13	1	0.0732022	13	9	10	arrhythmic	12	12	2.81817e-05	13	3	7	annual	12	12	0.00477355	7	3	3	half-annual	6	12	9.82172e-09	14	10
OG0004845	Lthed_scf0050.1_g096330.1	Qgl_scf0040.1_g110020.1	AT5G27120.1	AT5G27120.1	0.453273	12	3	6	arrhythmic	11	12	0.0920269	13	1	10	arrhythmic	12	10	0.576792	12	9	7	arrhythmic	11	1	0.0298593	18	4	11	arrhythmic	17	8	1.04421e-05	13	6	3	annual	12	3	0.0460858	23	11	2	arrhythmic	21	8	0.00189152	12	11
OG0004846	Lthed_scf0100.1_g085980.1	Qgl_scf0100.1_g018480.1	AT3G50410.1	AT3G50410.1	0.808693	14	8	10	arrhythmic	13	5	2.15478e-05	13	12	4	annual	12	9	0.100697	14	13	10	arrhythmic	13	4	0.0357942	12	3	6	arrhythmic	11	7	3.75615e-09	13	11	5	annual	12	8	6.74043e-10	14	11	6	annual	13	8	2.60802e-07	13	3
OG0004849	Lthed_scf0090.1_g023270.1	Qgl_scf0060.1_g090050.1	AT4G25670.2	AT4G25670.2	0.00230741	10	5	4	annual	9	2	0.0138652	22	2	13	arrhythmic	20	11	5.3309e-06	14	9	7	annual	13	1	4.93143e-05	12	10	4	annual	11	1	0.0384626	10	5	3	arrhythmic	9	2	2.27107e-05	12	4	4	annual	11	1	0.0138309	13	10
OG0004850	Lthed_scf0090.1_g023180.1	Qgl_scf0060.1_g090180.1	AT4G25700.1	AT4G25700.1	0.127604	23	1	2	arrhythmic	21	10	0.0775344	13	13	4	arrhythmic	12	10	0.386237	7	7	5	arrhythmic	6	11	0.00109558	12	10	3	annual	11	1	0.970755	12	7	9	arrhythmic	11	4	0.00454074	13	11	6	annual	12	8	0.0335106	12	3
OG0004851	Lthed_scf0090.1_g022080.1	Qgl_scf0060.1_g091170.1	AT4G21190.1	AT4G21190.1	0.037127	13	7	1	arrhythmic	12	4	0.00121065	13	5	7	annual	12	2	3.48323e-05	13	8	8	annual	12	12	6.20927e-08	12	10	5	annual	11	1	0.000183285	11	4	5	annual	10	1	1.58586e-07	13	4	8	annual	12	1	7.12208e-05	14	10
OG0004852	Lthed_scf0030.1_g123090.1	Qgl_scf0010.1_g053680.1	AT2G13600.1	AT2G13600.1	0.0494361	19	5	11	arrhythmic	17	2	3.66361e-07	14	10	6	annual	13	7	0.110401	13	8	6	arrhythmic	12	12	0.0104577	12	11	7	arrhythmic	11	2	0.378851	11	10	8	arrhythmic	10	7	0.220102	20	3	11	arrhythmic	18	12	0.109572	23	21
OG0004853	Lthed_scf0090.1_g016170.1	Qgl_scf0060.1_g102070.1	AT5G53460.3	AT5G53460.3	0.000286192	14	8	8	annual	13	5	0.172222	4	4	3	arrhythmic	4	1	0.0246962	13	1	5	arrhythmic	12	5	0.0011806	15	15	2	annual	14	6	0.0427543	13	9	3	arrhythmic	12	6	0.892182	14	5	10	arrhythmic	13	2	0.00938714	13	8
OG0004854	Lthed_scf0090.1_g016030.1	Qgl_scf0060.1_g102190.1	AT5G53440.1	AT5G53440.2	0.417724	12	12	8	arrhythmic	11	9	0.00991106	14	9	7	annual	13	6	0.140903	13	5	6	arrhythmic	12	9	0.000263461	15	2	7	annual	14	6	0.0258244	10	4	5	arrhythmic	9	1	0.00284915	12	5	3	annual	11	2	0.0787258	13	11
OG0004855	Lthed_scf0090.1_g015990.1	Qgl_scf0060.1_g102220.1	AT5G53400.1	AT5G53400.1	0.454661	12	12	3	arrhythmic	11	9	0.0245221	19	4	16	arrhythmic	17	1	0.00945617	15	3	1	annual	14	7	0.188534	23	3	12	arrhythmic	21	7	2.35705e-05	6	5	3	half-annual	6	2	0.0020324	7	3	4	half-annual	6	12	0.506623	16	1
OG0004856	Lthed_scf0060.1_g010530.1	Qgl_scf0090.1_g114740.1			0.322027	17	3	4	arrhythmic	16	12	0.00591277	15	14	11	annual	14	10	0.0247527	14	8	12	arrhythmic	13	12	0.00155952	12	9	9	annual	11	12	0.00026625	20	19	6	arrhythmic	18	3	0.0635594	20	16	9	arrhythmic	18	12	0.268834	13	9
OG0004858	Lthed_scf0060.1_g012950.1	Qgl_scf0090.1_g110830.1	AT1G15110.4	AT1G15110.4	0.959702	23	16	11	arrhythmic	21	12	0.000388561	14	5	6	annual	13	2	0.0716297	12	12	5	arrhythmic	11	3	0.0312813	13	9	10	arrhythmic	12	12	0.00481351	12	4	9	annual	11	1	0.000437938	13	4	6	annual	12	1	0.000226911	16	9
OG0004861	Lthed_scf0060.1_g080920.1	Qgl_scf0090.1_g038980.1	AT5G38830.1	AT5G38830.1	0.362468	9	2	4	arrhythmic	8	11	0.108826	10	7	6	arrhythmic	9	4	0.101135	15	12	14	arrhythmic	14	3	0.239502	11	5	2	arrhythmic	10	9	0.383526	14	12	5	arrhythmic	13	9	0.0603476	13	1	2	arrhythmic	12	10	0.565711	14	12
OG0004864	Lthed_scf0090.1_g046160.1	Qgl_scf0060.1_g067100.1	AT5G17020.2	AT5G17020.1	0.346018	23	1	2	arrhythmic	21	10	0.176979	23	17	15	arrhythmic	21	1	0.519564	8	1	3	arrhythmic	7	5	0.0314505	23	3	7	arrhythmic	21	7	0.299292	4	4	1	arrhythmic	4	1	0.983003	13	13	2	arrhythmic	12	10	0.00127869	16	1
OG0004865	Lthed_scf0090.1_g046230.1	Qgl_scf0060.1_g067040.1	AT5G17060.2	AT5G17060.2	0.000704379	13	3	6	annual	12	12	0.133671	13	5	6	arrhythmic	12	2	0.809666	16	8	12	arrhythmic	15	12	0.0732285	23	10	11	arrhythmic	21	1	0.0175907	10	5	4	arrhythmic	9	2	0.0470873	19	3	13	arrhythmic	17	12	0.247868	7	3
OG0004869	Lthed_scf0120.1_g073230.1	Qgl_scf0120.1_g064390.1	AT1G22170.2	AT1G22170.2	0.0424919	12	10	3	arrhythmic	11	7	0.0314459	6	6	3	arrhythmic	6	3	0.0594123	13	1	3	arrhythmic	12	5	0.179795	9	4	5	arrhythmic	8	8	0.00542839	10	9	6	annual	9	6	8.91469e-06	14	11	6	annual	13	8	0.0108127	15	1
OG0004870	Lthed_scf0120.1_g071920.1	Qgl_scf0120.1_g063490.1	AT1G22020.2	AT1G22020.2	0.996926	14	1	7	arrhythmic	13	10	8.81225e-06	13	6	4	annual	12	3	0.892158	14	12	1	arrhythmic	13	3	0.0116426	12	11	4	arrhythmic	11	2	0.000518885	12	5	2	annual	11	2	5.5572e-07	12	4	5	annual	11	1	0.0151574	13	10
OG0004872	Lthed_scf0090.1_g071500.1	Qgl_scf0060.1_g040030.1	AT4G08500.1	AT4G08500.1	0.000491377	12	11	7	annual	11	8	0.996844	12	9	6	arrhythmic	11	6	0.0651288	14	2	6	arrhythmic	13	6	0.0409326	7	1	6	arrhythmic	6	5	0.277257	12	9	11	arrhythmic	11	6	0.965549	12	1	7	arrhythmic	11	10	0.0863043	18	15
OG0004875	Lthed_scf0090.1_g065190.1	Qgl_scf0060.1_g046460.1	AT1G21880.2	AT1G21880.2	3.22285e-05	13	9	8	annual	12	6	9.58659e-06	12	12	4	annual	11	9	0.013724	7	7	5	arrhythmic	6	11	0.32477	6	3	3	arrhythmic	6	7	0.00105782	12	7	9	annual	11	4	1.27885e-07	13	10	6	annual	12	7	7.88393e-06	7	7
OG0004876	Lthed_scf0090.1_g065010.1	Qgl_scf0060.1_g046560.1	AT1G77610.1	AT1G77610.1	0.182982	18	16	10	arrhythmic	17	12	0.0798815	13	4	6	arrhythmic	12	1	0.000669471	14	13	3	annual	13	4	8.50537e-06	12	10	8	annual	11	1	0.0500752	21	15	19	arrhythmic	19	11	0.00817887	19	1	3	arrhythmic	17	10	0.905284	5	3
OG0004877	Lthed_scf0090.1_g064180.1	Qgl_scf0060.1_g047130.1	AT3G05270.3	AT3G05270.3	0.00387354	10	8	5	annual	9	5	0.0038002	13	11	11	annual	12	8	0.00150333	16	13	7	annual	15	4	0.00191078	12	4	6	annual	11	8	0.00088754	12	7	8	annual	11	4	6.09178e-06	13	10	7	annual	12	7	0.0369344	7	5
OG0004878	Lthed_scf0090.1_g042610.1	Qgl_scf0060.1_g069900.1	AT5G16790.2	AT5G16790.2	0.00350852	11	11	4	annual	10	8	0.410874	14	12	11	arrhythmic	13	9	0.00142297	17	2	3	annual	16	6	0.104112	23	19	2	arrhythmic	21	10	0.0182082	11	8	7	arrhythmic	10	5	0.261864	13	10	7	arrhythmic	12	7	0.788995	5	3
OG0004879	Lthed_scf0090.1_g039440.1	Qgl_scf0060.1_g072160.1	AT5G16650.1	AT5G16650.1	0.861127	7	4	4	arrhythmic	6	1	0.407846	16	10	9	arrhythmic	15	7	0.000145753	13	2	11	annual	12	6	0.0234435	23	10	14	arrhythmic	21	1	0.926158	5	5	2	arrhythmic	5	2	0.0669412	14	3	6	arrhythmic	13	12	0.00560238	12	12
OG0004880	Lthed_scf0090.1_g038770.1	Qgl_scf0060.1_g072460.1	AT3G13960.1	AT3G13960.1	0.827635	6	6	4	arrhythmic	6	3	0.00169137	14	10	11	annual	13	7	0.108827	12	1	10	arrhythmic	11	5	0.0694134	17	14	16	arrhythmic	16	5	1.08527e-06	13	6	3	annual	12	3	0.00196036	12	8	5	annual	11	5	1.44914e-07	13	12
OG0004881	Lthed_scf0090.1_g038520.1	Qgl_scf0060.1_g073070.1	AT1G64980.2	AT1G64980.2	0.0572378	13	9	4	arrhythmic	12	6	0.00994388	6	6	3	half-annual	6	3	0.0556175	11	2	5	arrhythmic	10	6	0.11354	15	9	8	arrhythmic	14	12	0.00572358	6	1	3	half-annual	6	10	2.15089e-06	13	8	9	annual	12	5	0.000947161	13	1
OG0004885	Lthed_scf0090.1_g011280.1	Qgl_scf0060.1_g106540.1	AT3G49550.1	AT3G49550.1	1.25382e-05	18	8	8	arrhythmic	17	5	0.0056077	14	9	8	annual	13	6	0.000152267	15	8	9	annual	14	12	0.0137225	19	15	7	arrhythmic	17	6	3.45974e-08	11	8	6	annual	10	5	5.97803e-06	13	8	8	annual	12	5	1.82543e-05	13	11
OG0004887	Lthed_scf0090.1_g012650.1	Qgl_scf0060.1_g105240.1	AT3G49470.1	AT3G49470.1	0.00281505	13	1	2	annual	12	10	0.000677459	13	13	3	annual	12	10	0.00818573	14	14	12	annual	13	5	0.136846	13	5	5	arrhythmic	12	9	0.976544	12	7	11	arrhythmic	11	4	4.56907e-06	13	10	5	annual	12	7	0.146186	13	13
OG0004888	Lthed_scf0090.1_g013920.1	Qgl_scf0060.1_g103740.1	AT3G49350.1	AT3G49350.1	0.711178	12	8	8	arrhythmic	11	5	0.153408	12	5	9	arrhythmic	11	2	0.126059	14	9	8	arrhythmic	13	1	1.99294e-06	13	10	6	annual	12	1	0.314611	6	5	2	arrhythmic	6	2	0.98545	5	2	3	arrhythmic	5	11	1.36738e-06	12	9
OG0004889	Lthed_scf0090.1_g013940.1	Qgl_scf0060.1_g103720.1	AT5G53550.6	AT5G53550.6	0.276389	7	6	2	arrhythmic	6	3	0.000646633	14	8	8	annual	13	5	1.48655e-06	14	12	1	annual	13	3	3.41486e-05	13	12	4	annual	12	3	9.66103e-08	12	5	8	annual	11	2	0.441843	12	7	6	arrhythmic	11	4	0.00193619	14	11
OG0004890	Lthed_scf0090.1_g014010.1	Qgl_scf0060.1_g103680.1	AT4G27680.1	AT4G27680.1	0.0651605	12	4	4	arrhythmic	11	1	0.000194695	13	4	7	annual	12	1	3.19503e-05	14	9	4	annual	13	1	1.80496e-06	12	11	3	annual	11	2	0.247486	13	3	7	arrhythmic	12	12	0.95343	6	4	3	arrhythmic	6	1	0.000457044	14	12
OG0004891	Lthed_scf0090.1_g014050.1	Qgl_scf0060.1_g103670.1	AT2G46620.1	AT2G46620.1	0.00587578	12	6	6	annual	11	3	0.000195228	13	6	7	annual	12	3	1.59408e-05	15	8	9	annual	14	12	8.56688e-07	13	9	9	annual	12	12	0.956696	6	3	3	arrhythmic	6	12	0.211091	17	12	1	arrhythmic	16	9	0.000124268	13	11
OG0004893	Lthed_scf0050.1_g073070.1	Qgl_scf0040.1_g080250.1	AT1G14870.1	AT1G14870.1	0.000127436	13	2	7	annual	12	11	0.125778	15	7	10	arrhythmic	14	4	0.310919	12	11	7	arrhythmic	11	2	0.00041026	13	3	6	annual	12	7	0.0228795	15	6	14	arrhythmic	14	3	0.228381	4	1	3	arrhythmic	4	10	0.000909623	13	2
OG0004894	Lthed_scf0050.1_g072870.1	Qgl_scf0040.1_g080020.1	AT1G23220.1	AT1G23220.1	0.273782	17	3	7	arrhythmic	16	12	6.73191e-05	13	2	5	annual	12	11	0.97311	6	2	4	arrhythmic	6	6	0.000987058	7	7	1	half-annual	6	11	1.17225e-06	12	2	2	annual	11	11	2.05723e-05	14	1	6	annual	13	10	0.000598633	7	7
OG0004895	Lthed_scf0050.1_g071110.1	Qgl_scf0040.1_g078210.1	AT2G01690.1	AT2G01690.1	4.85309e-05	13	3	10	annual	12	12	1.32394e-06	13	3	10	annual	12	12	0.000120791	15	8	9	annual	14	12	0.00309271	13	8	10	annual	12	12	1.02364e-06	12	3	9	annual	11	12	1.23765e-11	14	2	8	annual	13	11	2.45201e-07	15	8
OG0004896	Lthed_scf0050.1_g070820.1	Qgl_scf0040.1_g077600.1	AT1G68060.1	AT1G68060.1	0.0533651	14	8	13	arrhythmic	13	5	2.34356e-05	11	2	7	annual	10	11	0.0645754	18	13	8	arrhythmic	17	4	2.90544e-06	12	3	8	annual	11	7	0.0011447	17	13	2	annual	16	10	5.99435e-08	13	13	3	annual	12	10	0.000168206	15	1
OG0004897	Lthed_scf0030.1_g132040.1	Qgl_scf0010.1_g043850.1	AT4G14590.1	AT4G14590.1	0.227525	11	2	3	arrhythmic	10	11	0.0044551	15	9	11	annual	14	6	0.000758847	18	8	5	arrhythmic	17	12	0.845713	23	1	9	arrhythmic	21	5	0.034546	6	4	3	arrhythmic	6	1	4.61955e-06	12	4	6	annual	11	1	0.00276915	14	10
OG0004898	Lthed_scf0050.1_g068520.1	Qgl_scf0040.1_g073180.1	AT5G24080.2	AT5G24080.2	0.00133067	13	12	6	annual	12	9	0.00443374	15	6	11	annual	14	3	0.00503128	14	12	13	annual	13	3	0.173634	13	2	6	arrhythmic	12	6	0.161687	12	9	11	arrhythmic	11	6	0.163183	15	9	10	arrhythmic	14	6	7.71781e-07	14	2
OG0004899	Lthed_scf0030.1_g133370.1	Qgl_scf0010.1_g041610.1	AT3G12280.2	AT3G12280.2	1.29048e-06	13	4	7	annual	12	1	0.00511557	13	4	5	annual	12	1	0.164172	14	10	9	arrhythmic	13	1	0.077265	13	10	5	arrhythmic	12	1	1.71225e-05	15	1	6	annual	14	10	0.00185965	12	4	5	annual	11	1	0.00431502	6	4
OG0004900	Lthed_scf0050.1_g059910.1	Qgl_scf0040.1_g065120.1	AT3G18630.1	AT3G18630.1	0.0179753	13	4	9	arrhythmic	12	1	0.142575	13	11	6	arrhythmic	12	8	1.34439e-07	14	3	6	annual	13	7	0.00496138	13	3	6	annual	12	7	0.122586	6	1	4	arrhythmic	6	10	0.000187724	13	10	6	annual	12	7	0.0195047	12	7
OG0004901	Lthed_scf0050.1_g066310.1	Qgl_scf0040.1_g072010.1	AT2G01930.2	AT2G01930.2	0.562624	8	8	5	arrhythmic	7	5	4.09315e-05	14	2	7	annual	13	11	0.00256035	13	8	12	annual	12	12	0.0233613	14	9	7	arrhythmic	13	12	0.570285	4	4	2	arrhythmic	4	1	0.0145207	14	2	13	arrhythmic	13	11	3.46191e-06	14	10
OG0004902	Lthed_scf0050.1_g066900.1	Qgl_scf0040.1_g072520.1	AT1G68080.1	AT1G68080.1	0.484651	7	4	4	arrhythmic	6	1	0.0729417	13	4	5	arrhythmic	12	1	0.0364982	12	12	5	arrhythmic	11	3	0.427407	12	2	7	arrhythmic	11	6	0.04209	10	3	6	arrhythmic	9	12	0.0492136	14	4	6	arrhythmic	13	1	0.971399	7	1
OG0004903	Lthed_scf0050.1_g052070.1	Qgl_scf0040.1_g058220.1	AT3G25640.2	AT3G25640.2	1	14	8	8	arrhythmic	13	5	1	13	11	7	arrhythmic	12	8	8.26139e-05	14	13	12	annual	13	4	6.93774e-06	12	3	8	annual	11	7	0.00209965	12	12	4	annual	11	9	2.00694e-05	14	12	6	annual	13	9	7.58907e-08	14	1
OG0004904	Lthed_scf0100.1_g100030.1	Qgl_scf0100.1_g004370.1	AT5G23280.1	AT5G23280.1	1.82598e-06	12	12	3	annual	11	9	0.000139708	12	12	4	annual	11	9	4.78857e-07	14	13	11	annual	13	4	0.000226598	12	2	8	annual	11	6	0.00162346	13	11	4	annual	12	8	3.70357e-06	13	11	5	annual	12	8	2.8483e-07	14	2
OG0004905	Lthed_scf0050.1_g049830.1	Qgl_scf0040.1_g055930.1	AT4G02580.1	AT4G02580.1	0.347023	23	12	14	arrhythmic	21	9	0.966667	7	5	5	arrhythmic	6	2	0.110948	7	7	3	arrhythmic	6	11	0.0991131	7	7	3	arrhythmic	6	11	0.0412328	11	8	6	arrhythmic	10	5	0.000973738	13	8	9	annual	12	5	0.00561844	6	2
OG0004906	Lthed_scf0050.1_g060020.1	Qgl_scf0040.1_g065180.1	AT5G64520.5	AT5G64520.5	0.287264	23	3	20	arrhythmic	21	12	0.680204	23	12	5	arrhythmic	21	9	0.0959543	23	3	10	arrhythmic	21	7	0.142019	7	6	3	arrhythmic	6	10	0.242713	11	10	6	arrhythmic	10	7	0.674349	23	6	13	arrhythmic	21	3	0.361768	13	10
OG0004907	Lthed_scf0050.1_g049670.1	Qgl_scf0040.1_g055760.1	AT5G23120.2	AT5G23120.2	0.0144764	7	5	4	arrhythmic	6	2	0.545243	8	2	2	arrhythmic	7	11	0.0936871	14	3	10	arrhythmic	13	7	0.00247129	13	8	7	annual	12	12	0.00420953	12	5	4	annual	11	2	0.74266	9	2	2	arrhythmic	8	11	0.000207347	16	10
OG0004908	Lthed_scf0050.1_g111530.1	Qgl_scf0040.1_g132920.1	AT1G06440.1	AT1G06440.1	0.000202952	6	1	3	half-annual	6	10	0.0394524	7	1	3	arrhythmic	6	10	0.000828223	13	11	4	annual	12	2	0.000317249	6	1	3	half-annual	6	5	0.267814	7	6	3	arrhythmic	6	3	0.0234348	13	6	7	arrhythmic	12	3	0.0134845	13	12
OG0004910	Lthed_scf0050.1_g022600.1	Qgl_scf0040.1_g028990.1	AT1G24590.1	AT1G24590.1	1	2	2	1	arrhythmic	2	11	1	2	2	1	arrhythmic	2	11	1	14	13	5	arrhythmic	13	4	1	10	4	4	arrhythmic	9	8	1.16783e-06	12	7	10	annual	11	4	0.0148042	13	11	3	arrhythmic	12	8	2.53776e-09	13	11
OG0004913	Lthed_scf0050.1_g019110.1	Qgl_scf0040.1_g026110.1	AT1G70505.4	AT1G70505.4	0.997829	4	1	2	arrhythmic	4	10	0.210396	14	5	4	arrhythmic	13	2	0.184461	12	11	5	arrhythmic	11	2	0.00012187	13	9	9	annual	12	12	8.22865e-05	13	8	8	annual	12	5	4.04905e-05	13	12	4	annual	12	9	0.00525309	14	13
OG0004917	Lthed_scf0050.1_g017460.1	Qgl_scf0040.1_g018740.1	AT1G70170.1	AT1G70170.1	5.62625e-06	12	1	3	annual	11	10	0.0219847	14	6	12	arrhythmic	13	3	0.127951	12	2	8	arrhythmic	11	6	0.000371627	12	3	7	annual	11	7	0.0504936	13	11	5	arrhythmic	12	8	0.0683188	13	13	3	arrhythmic	12	10	0.000163796	13	3
OG0004918	Lthed_scf0050.1_g016130.1	Qgl_scf0040.1_g017970.1	AT1G59650.1	AT1G59650.1	0.203988	14	11	8	arrhythmic	13	8	3.51447e-06	13	4	7	annual	12	1	0.0733176	7	3	3	arrhythmic	6	7	0.117509	12	10	8	arrhythmic	11	1	0.00635528	6	3	4	half-annual	6	12	3.67323e-05	16	2	6	annual	15	11	0.00699912	14	9
OG0004919	Lthed_scf0050.1_g015780.1	Qgl_scf0040.1_g017710.1	AT5G62620.1	AT5G62620.1	0.917526	7	1	2	arrhythmic	6	10	0.000121174	15	11	7	annual	14	8	0.931892	11	5	3	arrhythmic	10	9	0.12036	7	2	5	arrhythmic	6	6	0.000771092	10	2	5	annual	9	11	0.00576625	14	12	4	annual	13	9	0.328309	6	4
OG0004920	Lthed_scf0050.1_g015400.1	Qgl_scf0040.1_g017260.1	AT1G59725.1	AT1G59725.1	0.048399	13	9	9	arrhythmic	12	6	0.0227737	14	11	7	arrhythmic	13	8	0.389619	11	2	4	arrhythmic	10	6	0.167331	7	1	5	arrhythmic	6	5	0.0132308	11	4	4	arrhythmic	10	1	0.00246958	12	2	6	annual	11	11	0.389076	6	4
OG0004921	Lthed_scf0050.1_g014970.1	Qgl_scf0040.1_g016640.1	AT2G02710.2	AT2G02710.2	0.0876722	15	11	7	arrhythmic	14	8	0.0405149	13	8	12	arrhythmic	12	5	0.961978	5	1	2	arrhythmic	5	5	0.277413	7	5	2	arrhythmic	6	9	0.00665072	6	3	3	half-annual	6	12	0.00199661	14	2	9	annual	13	11	9.59085e-05	13	10
OG0004922	Lthed_scf0050.1_g014650.1	Qgl_scf0040.1_g016440.1	AT5G15110.1	AT5G15110.1	1	13	9	4	arrhythmic	12	6	0.999174	6	1	4	arrhythmic	6	10	1	8	6	4	arrhythmic	7	10	1	15	15	3	arrhythmic	14	6	1	7	7	3	arrhythmic	6	4	1	6	1	4	arrhythmic	6	10	1	14	13
OG0004923	Lthed_scf0050.1_g014630.1	Qgl_scf0040.1_g016410.1	AT1G27000.1	AT1G27000.1	0.0018311	13	4	7	annual	12	1	4.25001e-10	13	4	8	annual	12	1	0.0433053	15	8	8	arrhythmic	14	12	8.86841e-06	13	11	5	annual	12	2	1.00253e-06	12	5	3	annual	11	2	1.70979e-08	13	3	8	annual	12	12	1.47297e-06	14	10
OG0004925	Lthed_scf0050.1_g012840.1	Qgl_scf0040.1_g014570.1	AT1G69710.1	AT1G69710.2	0.0104697	16	1	5	arrhythmic	15	10	0.21702	23	17	13	arrhythmic	21	1	0.35496	11	7	8	arrhythmic	10	11	0.0594751	19	3	16	arrhythmic	17	7	0.115056	12	8	7	arrhythmic	11	5	0.63007	12	8	7	arrhythmic	11	5	0.505322	10	6
OG0004927	Lthed_scf0050.1_g011350.1	Qgl_scf0040.1_g012390.1	AT3G28960.5	AT3G28960.5	1	7	7	1	arrhythmic	6	4	0.00297563	16	9	9	annual	15	6	0.92382	7	5	1	arrhythmic	6	9	0.0459289	12	1	10	arrhythmic	11	5	0.99995	7	7	3	arrhythmic	6	4	0.00449544	12	1	3	annual	11	10	1	14	14
OG0004930	Lthed_scf0050.1_g008130.1	Qgl_scf0040.1_g010590.1	AT1G14060.1	AT1G14060.1	0.000326216	12	12	4	annual	11	9	6.9988e-05	13	12	4	annual	12	9	0.713582	6	4	4	arrhythmic	6	8	0.0109195	12	11	3	arrhythmic	11	2	0.00789483	11	8	7	annual	10	5	1.17075e-05	14	10	7	annual	13	7	0.0817171	17	9
OG0004931	Lthed_scf0050.1_g007760.1	Qgl_scf0040.1_g010290.1	AT1G14020.1	AT1G14020.1	0.0296645	12	8	8	arrhythmic	11	5	0.00753999	12	12	6	annual	11	9	0.0178354	14	13	11	arrhythmic	13	4	0.00203188	14	14	10	annual	13	5	4.30499e-05	11	8	7	annual	10	5	0.000635374	12	11	5	annual	11	8	0.00481428	7	5
OG0004932	Lthed_scf0050.1_g007660.1	Qgl_scf0040.1_g010260.1	AT1G14010.1	AT1G26690.1	0.00899046	13	2	7	annual	12	11	0.000214917	13	4	7	annual	12	1	0.262712	15	7	11	arrhythmic	14	11	0.41105	13	9	12	arrhythmic	12	12	0.0174949	12	4	8	arrhythmic	11	1	0.709651	6	4	3	arrhythmic	6	1	0.752715	7	3
OG0004933	Lthed_scf0050.1_g007480.1	Qgl_scf0040.1_g009990.1	AT1G14000.1	AT1G14000.1	0.331289	22	17	6	arrhythmic	20	1	0.984	12	5	5	arrhythmic	11	2	0.947884	9	8	3	arrhythmic	8	12	0.0727173	4	1	2	arrhythmic	4	5	0.00290366	7	1	4	half-annual	6	10	0.0819308	20	13	11	arrhythmic	18	10	0.0024165	14	13
OG0004934	Lthed_scf0050.1_g007020.1	Qgl_scf0040.1_g009530.1	AT2G03340.1	AT2G03340.1	0.164523	10	10	3	arrhythmic	9	7	2.69679e-06	12	8	4	annual	11	5	0.120562	13	7	1	arrhythmic	12	11	9.8612e-08	14	3	6	annual	13	7	0.0127858	13	4	6	arrhythmic	12	1	0.0936399	14	4	5	arrhythmic	13	1	0.249192	18	9
OG0004935	Lthed_scf0050.1_g006260.1	Qgl_scf0040.1_g008480.1	AT1G69340.2	AT1G69340.2	0.00876739	7	3	3	half-annual	6	12	0.0817548	14	3	5	arrhythmic	13	12	0.0014444	14	8	11	annual	13	12	0.0185069	12	10	4	arrhythmic	11	1	0.0135745	12	5	2	arrhythmic	11	2	0.000172021	13	3	7	annual	12	12	0.00145146	14	10
OG0004936	Lthed_scf0050.1_g005500.1	Qgl_scf0040.1_g006830.1	AT5G11750.1	AT4G11630.1	0.0827211	13	12	5	arrhythmic	12	9	2.07178e-11	13	13	3	annual	12	10	0.00700823	14	3	6	annual	13	7	0.10322	12	6	4	arrhythmic	11	10	0.003009	6	6	3	half-annual	6	3	0.206432	13	10	6	arrhythmic	12	7	0.476319	13	7
OG0004937	Lthed_scf0050.1_g005480.1	Qgl_scf0040.1_g006810.1	AT1G26560.1	AT1G26560.1	0.999993	4	2	1	arrhythmic	4	11	0.000609952	13	2	11	annual	12	11	0.999493	7	6	5	arrhythmic	6	10	0.00219808	13	10	4	annual	12	1	0.0112226	14	9	9	arrhythmic	13	6	1.36474e-06	14	2	8	annual	13	11	0.0372765	14	9
OG0004938	Lthed_scf0050.1_g004350.1	Qgl_scf0040.1_g005110.1	AT1G26480.1	AT1G26480.1	0.318061	7	1	3	arrhythmic	6	10	2.75071e-08	13	11	6	annual	12	8	0.0809004	7	7	2	arrhythmic	6	11	0.0285292	14	14	10	arrhythmic	13	5	0.054611	12	7	10	arrhythmic	11	4	2.50686e-07	13	10	7	annual	12	7	0.0289695	7	5
OG0004940	Lthed_scf0050.1_g002590.1	Qgl_scf0040.1_g002680.1	AT5G63670.1	AT5G63670.1	0.166896	7	5	3	arrhythmic	6	2	0.111375	15	10	9	arrhythmic	14	7	0.00613607	23	15	17	arrhythmic	21	6	0.0159015	11	5	6	arrhythmic	10	9	0.00155123	11	4	4	annual	10	1	0.104832	5	3	4	arrhythmic	5	12	0.01212	23	18
OG0004942	Lthed_scf0050.1_g002260.1	Qgl_scf0040.1_g002300.1	AT1G69170.1	AT1G69170.1	0.0989719	14	8	5	arrhythmic	13	5	0.941668	13	7	9	arrhythmic	12	4	0.00257415	13	13	6	annual	12	4	1.13588e-06	12	12	5	annual	11	3	0.00435579	12	9	6	annual	11	6	0.218844	23	17	16	arrhythmic	21	1	0.33322	7	7
OG0004944	Lthed_scf0050.1_g000900.1	Qgl_scf0040.1_g001270.1	AT2G03810.7	AT2G03810.7	0.00210625	6	3	4	half-annual	6	12	0.0010048	15	2	6	annual	14	11	1.93128e-05	14	13	9	annual	13	4	1.81366e-08	14	3	6	annual	13	7	0.00175206	11	1	7	annual	10	10	8.45798e-06	13	12	7	annual	12	9	6.64778e-05	13	5
OG0004946	Lthed_scf0050.1_g029530.1	Qgl_scf0040.1_g036630.1	AT5G08530.1	AT5G08530.1	0.000797484	13	12	4	annual	12	9	0.00434943	14	12	4	annual	13	9	0.000602796	14	13	13	annual	13	4	0.992979	12	4	8	arrhythmic	11	8	0.00703429	12	7	9	annual	11	4	5.16332e-08	13	10	7	annual	12	7	0.00221487	14	12
OG0004947	Lthed_scf0050.1_g029540.1	Qgl_scf0040.1_g036680.1	AT3G01810.3	AT3G01810.3	0.558696	10	8	6	arrhythmic	9	5	0.814999	6	6	4	arrhythmic	6	3	0.000383439	14	13	10	annual	13	4	1.53017e-06	12	3	8	annual	11	7	0.0481904	6	2	3	arrhythmic	6	11	0.000498369	13	1	2	annual	12	10	0.000126262	13	3
OG0004949	Lthed_scf0050.1_g030780.1	Qgl_scf0040.1_g038360.1	AT1G67480.3	AT1G67480.3	0.0176154	7	3	4	arrhythmic	6	12	0.00151533	7	2	5	half-annual	6	11	0.0142426	7	3	4	arrhythmic	6	7	0.358839	7	3	3	arrhythmic	6	7	0.597723	12	3	8	arrhythmic	11	12	0.0242356	6	4	3	arrhythmic	6	1	0.000692729	15	9
OG0004950	Lthed_scf0050.1_g031660.1	Qgl_scf0040.1_g039380.1	AT1G67360.2	AT1G67360.2	0.386548	13	3	6	arrhythmic	12	12	0.29639	6	4	3	arrhythmic	6	1	0.194488	7	3	3	arrhythmic	6	7	0.00408802	13	10	4	annual	12	1	2.44677e-06	12	4	4	annual	11	1	7.27838e-09	13	4	7	annual	12	1	0.000197421	14	10
OG0004951	Lthed_scf0050.1_g032590.1	Qgl_scf0040.1_g040030.1	AT1G67325.1	AT1G67325.1	0.0659278	15	12	8	arrhythmic	14	9	0.372738	23	16	14	arrhythmic	21	12	0.929591	8	5	4	arrhythmic	7	9	4.04427e-05	15	4	6	annual	14	8	0.0391397	10	8	6	arrhythmic	9	5	0.297086	23	10	20	arrhythmic	21	7	0.431835	7	5
OG0004952	Lthed_scf0050.1_g033910.1	Qgl_scf0040.1_g041040.1	AT5G50670.2	AT5G50670.2	4.86543e-09	13	9	7	annual	12	6	0.00101478	13	12	3	annual	12	9	0.000204702	14	13	11	annual	13	4	0.000829414	13	3	6	annual	12	7	0.000123447	11	8	7	annual	10	5	1.3966e-09	13	11	5	annual	12	8	0.399426	8	3
OG0004953	Lthed_scf0050.1_g034520.1	Qgl_scf0040.1_g042170.1	AT1G27990.1	AT1G27990.1	1.70426e-05	19	16	11	arrhythmic	17	12	0.218042	23	16	19	arrhythmic	21	12	0.0558974	14	8	10	arrhythmic	13	12	2.70399e-08	12	11	6	annual	11	2	0.000339307	17	15	11	annual	16	11	0.255711	13	2	7	arrhythmic	12	11	0.672799	13	10
OG0004954	Lthed_scf0050.1_g034540.1	Qgl_scf0040.1_g042190.1	AT5G13100.1	AT5G13100.1	0.00237005	20	9	7	arrhythmic	18	6	0.00250843	13	1	2	annual	12	10	0.00106272	13	13	11	annual	12	4	9.55252e-05	12	4	6	annual	11	8	0.0174302	13	12	5	arrhythmic	12	9	1.73464e-06	13	11	6	annual	12	8	0.000131738	13	13
OG0004955	Lthed_scf0050.1_g034590.1	Qgl_scf0040.1_g042220.1	AT5G13110.1	AT5G13110.1	7.48616e-05	15	4	4	annual	14	1	6.12666e-07	13	4	7	annual	12	1	5.53394e-06	12	12	3	annual	11	3	2.49972e-06	13	11	3	annual	12	2	3.43527e-05	12	4	6	annual	11	1	5.42075e-10	13	4	6	annual	12	1	9.66356e-08	13	10
OG0004956	Lthed_scf0050.1_g037020.1	Qgl_scf0040.1_g044550.1	AT5G21090.1	AT5G21090.1	0.255343	13	3	9	arrhythmic	12	12	0.000240426	15	2	6	annual	14	11	0.00289517	10	4	2	annual	9	8	0.0275675	14	9	6	arrhythmic	13	12	0.00150799	6	1	2	half-annual	6	10	0.000717181	6	1	3	half-annual	6	10	0.0103969	14	6
OG0004957	Lthed_scf0050.1_g037640.1	Qgl_scf0040.1_g044950.1	AT2G33500.2	AT2G33500.2	0.539703	12	10	3	arrhythmic	11	7	0.0840532	13	6	3	arrhythmic	12	3	5.71925e-06	14	12	5	annual	13	3	0.00711001	10	2	5	annual	9	6	0.00270685	12	6	1	annual	11	3	6.04683e-08	13	4	7	annual	12	1	0.0152665	14	10
OG0004959	Lthed_scf0050.1_g039100.1	Qgl_scf0040.1_g046660.1	AT2G33540.1	AT2G33540.1	0.023987	15	2	9	arrhythmic	14	11	0.141039	13	2	9	arrhythmic	12	11	0.976182	16	7	10	arrhythmic	15	11	0.239112	6	1	3	arrhythmic	6	5	0.000252648	13	3	8	annual	12	12	8.1229e-07	14	2	8	annual	13	11	4.01734e-05	14	9
OG0004960	Lthed_scf0050.1_g039290.1	Qgl_scf0040.1_g046770.1	AT5G13280.1	AT5G13280.1	0.00899052	12	1	2	annual	11	10	0.00721797	13	1	5	annual	12	10	3.44702e-05	14	13	13	annual	13	4	0.183829	12	6	7	arrhythmic	11	10	0.125121	6	1	2	arrhythmic	6	10	0.00278391	13	10	6	annual	12	7	0.0897617	7	5
OG0004961	Lthed_scf0050.1_g041090.1	Qgl_scf0040.1_g048620.1	AT1G01630.1	AT1G01630.1	0.0114899	11	6	8	arrhythmic	10	3	0.14155	17	5	15	arrhythmic	16	2	2.91671e-06	13	1	10	annual	12	5	0.000182693	12	5	7	annual	11	9	0.012083	12	9	5	arrhythmic	11	6	0.00423206	15	9	10	annual	14	6	0.0994012	7	6
OG0004962	Lthed_scf0080.1_g001290.1	Qgl_scf0070.1_g116560.1	AT1G76490.1	AT1G76490.1	0.00941136	17	8	10	annual	16	5	0.519186	4	4	3	arrhythmic	4	1	1.34218e-09	13	1	7	annual	12	5	0.151898	7	3	2	arrhythmic	6	7	0.377159	4	3	3	arrhythmic	4	12	0.0779082	14	10	7	arrhythmic	13	7	0.000196755	13	3
OG0004964	Lthed_scf0080.1_g001570.1	Qgl_scf0070.1_g116440.1	AT4G35360.2	AT4G35360.2	0.00155596	15	3	6	annual	14	12	6.61511e-07	13	3	8	annual	12	12	3.77707e-05	12	10	6	annual	11	1	2.61585e-05	13	7	10	annual	12	11	0.345332	11	11	6	arrhythmic	10	8	0.0068262	23	17	11	arrhythmic	21	1	0.0535972	14	14
OG0004967	Lthed_scf0080.1_g002470.1	Qgl_scf0070.1_g114590.1	AT2G17200.1	AT2G17200.1	3.88664e-05	16	16	9	annual	15	12	8.02909e-08	13	4	8	annual	12	1	0.00176417	13	9	8	annual	12	1	8.91128e-05	11	11	7	annual	10	2	3.23847e-05	12	4	8	annual	11	1	0.523888	7	7	4	arrhythmic	6	4	0.148966	12	12
OG0004971	Lthed_scf0080.1_g009560.1	Qgl_scf0070.1_g105690.1	AT4G38550.5	AT2G16900.6	0.983307	7	6	2	arrhythmic	6	3	0.00238783	11	6	7	annual	10	3	0.00225942	13	11	3	annual	12	2	0.0213832	12	10	10	arrhythmic	11	1	0.163768	7	4	3	arrhythmic	6	1	5.7153e-05	14	2	8	annual	13	11	7.6387e-06	13	11
OG0004972	Lthed_scf0080.1_g010910.1	Qgl_scf0070.1_g104490.1	AT4G38580.2	AT4G38580.2	0.431633	7	3	2	arrhythmic	6	12	0.969311	12	4	8	arrhythmic	11	1	0.00241525	14	8	5	annual	13	12	0.00085278	11	10	5	annual	10	1	4.10124e-05	12	3	5	annual	11	12	0.00205755	13	3	8	annual	12	12	0.0550925	15	9
OG0004973	Lthed_scf0080.1_g011210.1	Qgl_scf0070.1_g104350.1	AT4G38600.3	AT4G38600.3	0.000144164	20	16	13	arrhythmic	18	12	1.16912e-08	13	4	7	annual	12	1	0.000344132	13	10	4	annual	12	1	0.000176486	13	8	10	annual	12	12	0.000311257	12	4	4	annual	11	1	4.64076e-07	13	4	6	annual	12	1	0.000203718	12	11
OG0004974	Lthed_scf0080.1_g011750.1	Qgl_scf0070.1_g104030.1	AT2G16700.1	AT2G16700.1	1	13	9	6	arrhythmic	12	6	0.0476161	13	12	2	arrhythmic	12	9	0.999984	11	4	7	arrhythmic	10	8	0.049685	13	10	10	arrhythmic	12	1	1.94311e-07	12	10	4	annual	11	7	1.11001e-11	13	11	4	annual	12	8	0.0255124	14	13
OG0004975	Lthed_scf0080.1_g012200.1	Qgl_scf0070.1_g103360.1	AT4G38660.1	AT4G38660.1	0.000924434	12	8	8	annual	11	5	8.05736e-06	13	11	6	annual	12	8	1.11921e-06	13	1	9	annual	12	5	0.00166025	13	1	10	annual	12	5	0.0020643	12	8	8	annual	11	5	8.48509e-10	13	10	6	annual	12	7	0.000190421	14	4
OG0004976	Lthed_scf0080.1_g012570.1	Qgl_scf0070.1_g103190.1	AT2G21060.1	AT2G21060.1	0.0464014	23	8	11	arrhythmic	21	5	0.14277	23	5	15	arrhythmic	21	2	0.992161	14	13	13	arrhythmic	13	4	0.0169696	13	5	6	arrhythmic	12	9	0.417956	23	11	3	arrhythmic	21	8	0.00121026	23	11	3	arrhythmic	21	8	0.40186	14	12
OG0004977	Lthed_scf0080.1_g014960.1	Qgl_scf0070.1_g099520.1	AT2G16595.1	AT2G16595.1	0.350489	7	1	4	arrhythmic	6	10	0.124399	14	12	11	arrhythmic	13	9	0.360814	5	4	2	arrhythmic	5	8	0.223833	13	10	5	arrhythmic	12	1	0.113579	4	3	3	arrhythmic	4	12	4.31906e-07	13	8	10	annual	12	5	0.950467	6	2
OG0004978	Lthed_scf0080.1_g015090.1	Qgl_scf0070.1_g099440.1	AT2G21150.1	AT2G21150.1	0.00360968	15	11	5	annual	14	8	0.0137964	22	5	4	arrhythmic	20	2	0.545793	7	2	3	arrhythmic	6	6	0.869441	6	4	4	arrhythmic	6	8	0.239516	6	4	3	arrhythmic	6	1	0.00215702	23	22	21	arrhythmic	21	6	0.476702	6	4
OG0004980	Lthed_scf0080.1_g017220.1	Qgl_scf0070.1_g097260.1	AT2G16500.1	AT2G16500.1	0.433056	8	8	5	arrhythmic	7	5	0.000930409	13	5	5	annual	12	2	0.00100448	14	13	4	annual	13	4	0.00103602	11	11	6	annual	10	2	0.623561	9	6	5	arrhythmic	8	3	0.827628	8	6	3	arrhythmic	7	3	0.0347991	11	4
OG0004983	Lthed_scf0080.1_g018550.1	Qgl_scf0070.1_g095060.1	AT4G39050.1	AT4G39050.1	0.00865617	15	8	10	annual	14	5	2.57897e-08	13	11	7	annual	12	8	0.00377889	14	13	12	annual	13	4	5.25088e-05	13	3	8	annual	12	7	0.00114597	12	8	8	annual	11	5	1.18373e-08	13	11	6	annual	12	8	0.102217	14	12
OG0004984	Lthed_scf0080.1_g018560.1	Qgl_scf0070.1_g095050.1	AT1G75540.1	AT1G75540.1	1	6	4	3	arrhythmic	6	1	0.999992	12	12	7	arrhythmic	11	9	0.999989	11	2	9	arrhythmic	10	6	0.170185	23	14	12	arrhythmic	21	5	0.000186219	12	7	10	annual	11	4	0.13045	11	9	9	arrhythmic	10	6	0.000953598	7	5
OG0004987	Lthed_scf0080.1_g019080.1	Qgl_scf0070.1_g094680.1	AT2G16405.1	AT2G16405.1	0.116849	9	8	7	arrhythmic	8	5	0.00275678	13	4	6	annual	12	1	0.803609	13	1	7	arrhythmic	12	5	0.0471166	12	3	7	arrhythmic	11	7	0.000200423	6	2	3	half-annual	6	11	0.0143943	12	9	9	arrhythmic	11	6	0.00625781	13	13
OG0004990	Lthed_scf0080.1_g020650.1	Qgl_scf0070.1_g091970.1	AT2G21600.1	AT2G21600.1	0.0921463	14	8	11	arrhythmic	13	5	0.123263	23	1	19	arrhythmic	21	10	0.00640324	12	12	5	annual	11	3	0.0459062	23	15	9	arrhythmic	21	6	0.0156965	12	8	10	arrhythmic	11	5	0.00429288	14	8	11	annual	13	5	0.0486134	13	1
OG0004991	Lthed_scf0080.1_g020870.1	Qgl_scf0070.1_g091630.1	AT2G18260.2	AT2G18260.2	1	14	8	10	arrhythmic	13	5	1	12	12	4	arrhythmic	11	9	1	14	13	9	arrhythmic	13	4	1	12	3	4	arrhythmic	11	7	0.000217463	11	8	8	annual	10	5	8.97646e-07	13	10	7	annual	12	7	0.000133662	14	12
OG0004992	Lthed_scf0080.1_g021030.1	Qgl_scf0070.1_g091430.1	AT4G34530.1	AT4G34530.1	2.22722e-10	13	9	7	annual	12	6	1.98959e-12	13	11	5	annual	12	8	8.31338e-05	13	1	9	annual	12	5	0.00150065	12	4	5	annual	11	8	2.1145e-10	12	10	6	annual	11	7	5.91958e-09	14	9	8	annual	13	6	7.19134e-07	13	2
OG0004994	Lthed_scf0080.1_g021600.1	Qgl_scf0070.1_g090870.1	AT1G63850.1	AT1G63850.1	0.206873	23	1	3	arrhythmic	21	10	0.300864	12	9	10	arrhythmic	11	6	0.00376844	15	3	7	annual	14	7	0.000200884	12	3	6	annual	11	7	0.0398332	23	13	18	arrhythmic	21	10	0.165966	11	3	4	arrhythmic	10	12	7.66522e-07	14	3
OG0004995	Lthed_scf0080.1_g022920.1	Qgl_scf0070.1_g088790.1	AT1G47740.3	AT1G47740.3	0.210851	13	8	12	arrhythmic	12	5	6.44381e-05	14	12	4	annual	13	9	0.000137816	14	13	11	annual	13	4	3.12741e-07	13	3	6	annual	12	7	0.000138847	12	8	8	annual	11	5	6.06116e-09	13	11	5	annual	12	8	0.00952728	14	13
OG0004996	Lthed_scf0080.1_g024570.1	Qgl_scf0070.1_g086820.1	AT3G18890.1	AT3G18890.1	0.284943	13	3	5	arrhythmic	12	12	0.000963897	12	1	4	annual	11	10	0.000143742	13	2	9	annual	12	6	0.000458341	12	6	5	annual	11	10	0.000763853	6	2	3	half-annual	6	11	0.985501	6	2	2	arrhythmic	6	11	6.7187e-05	14	13
OG0004999	Lthed_scf0080.1_g032260.1	Qgl_scf0070.1_g077900.1	AT1G49620.1	AT1G49620.3	0.000137382	11	9	6	annual	10	6	0.00991325	6	6	3	half-annual	6	3	0.207356	7	7	5	arrhythmic	6	11	0.063597	12	3	5	arrhythmic	11	7	0.345011	16	1	15	arrhythmic	15	10	0.00437294	13	11	3	annual	12	8	2.57037e-06	14	12
OG0005000	Lthed_scf0080.1_g032270.1	Qgl_scf0070.1_g077880.1	AT2G15695.1	AT2G15695.1	0.188924	13	11	5	arrhythmic	12	8	0.360456	12	10	7	arrhythmic	11	7	0.0459487	13	5	6	arrhythmic	12	9	0.00673291	15	3	6	annual	14	7	0.166636	10	4	5	arrhythmic	9	1	1.2681e-07	12	4	4	annual	11	1	0.414075	7	3
OG0005001	Lthed_scf0010.1_g009240.1	Qgl_scf0020.1_g010230.1	AT4G06634.1	AT4G06634.1	2.24507e-06	13	4	8	annual	12	1	0.000258371	15	1	8	annual	14	10	0.00261584	13	8	9	annual	12	12	0.0883546	13	9	7	arrhythmic	12	12	1.03005e-06	12	4	3	annual	11	1	0.00305338	12	4	6	annual	11	1	0.0121002	13	9
OG0005004	Lthed_scf0010.1_g009570.1	Qgl_scf0020.1_g010470.1	AT1G61010.5	AT1G61010.5	2.6244e-08	13	4	7	annual	12	1	4.13801e-10	13	4	8	annual	12	1	3.2076e-05	14	10	7	annual	13	1	1.73182e-09	12	11	5	annual	11	2	1.15811e-09	13	3	6	annual	12	12	1.6425e-07	13	4	8	annual	12	1	1.27676e-07	13	11
OG0005005	Lthed_scf0010.1_g009590.1	Qgl_scf0020.1_g010490.1	AT4G20020.1	AT4G20020.1	0.00209615	13	12	5	annual	12	9	0.000394504	13	11	6	annual	12	8	0.0473945	13	3	10	arrhythmic	12	7	8.23633e-05	20	3	10	arrhythmic	18	7	0.599834	6	5	4	arrhythmic	6	2	0.0297444	17	8	7	arrhythmic	16	5	0.956864	15	3
OG0005006	Lthed_scf0020.1_g146280.1	Qgl_scf0030.1_g032920.1	AT3G01610.1	AT3G01610.2	0.00279476	11	3	4	annual	10	12	0.0226045	22	3	17	arrhythmic	20	12	0.00500033	7	3	3	half-annual	6	7	3.60421e-05	12	9	6	annual	11	12	0.0158622	10	4	5	arrhythmic	9	1	0.278578	12	6	1	arrhythmic	11	3	0.00942624	14	11
OG0005007	Lthed_scf0080.1_g076940.1	Qgl_scf0070.1_g035540.1	AT1G60890.1	AT1G60890.1	0.520847	19	7	9	arrhythmic	17	4	0.544325	7	2	3	arrhythmic	6	11	0.0225386	13	10	5	arrhythmic	12	1	0.165054	14	13	3	arrhythmic	13	4	0.0997171	13	10	8	arrhythmic	12	7	0.0207536	13	1	7	arrhythmic	12	10	0.0531942	14	8
OG0005008	Lthed_scf0040.1_g047890.1	Qgl_scf0050.1_g089330.1	AT1G10780.2	AT1G10780.2	1	14	8	9	arrhythmic	13	5	0.0978102	13	11	10	arrhythmic	12	8	0.196179	23	1	5	arrhythmic	21	5	0.98944	7	7	5	arrhythmic	6	11	0.00021882	12	7	10	annual	11	4	9.5048e-07	13	10	7	annual	12	7	0.000740516	7	5
OG0005009	Lthed_scf0080.1_g108630.1	Qgl_scf0070.1_g001940.1	AT1G25290.2	AT1G25290.2	0.0113051	12	7	5	arrhythmic	11	4	0.0848991	6	1	4	arrhythmic	6	10	0.696423	12	10	6	arrhythmic	11	1	0.170209	6	1	3	arrhythmic	6	5	0.0294413	14	3	7	arrhythmic	13	12	0.966642	6	2	3	arrhythmic	6	11	0.001494	14	12
OG0005012	Lthed_scf0010.1_g011880.1	Qgl_scf0020.1_g012490.1	AT1G11400.6	AT1G11400.6	0.0044906	12	11	6	annual	11	8	0.0345112	11	10	8	arrhythmic	10	7	9.91945e-05	14	3	7	annual	13	7	5.71673e-08	13	3	7	annual	12	7	0.00231616	13	11	5	annual	12	8	3.12337e-07	13	10	6	annual	12	7	0.0141739	7	6
OG0005013	Lthed_scf0080.1_g075360.1	Qgl_scf0070.1_g037010.1	AT3G19720.2	AT3G19720.1	0.00247854	14	8	8	annual	13	5	2.04879e-09	13	11	6	annual	12	8	0.0317434	14	5	6	arrhythmic	13	9	0.000539395	12	6	4	annual	11	10	0.0414265	11	8	8	arrhythmic	10	5	2.61635e-06	14	11	6	annual	13	8	0.152569	7	5
OG0005014	Lthed_scf0080.1_g075100.1	Qgl_scf0070.1_g037800.1	AT5G64570.1	AT5G64570.1	0.41568	7	1	3	arrhythmic	6	10	0.361959	12	12	10	arrhythmic	11	9	9.58602e-05	14	13	10	annual	13	4	2.98095e-06	14	14	13	annual	13	5	0.00548188	12	7	10	annual	11	4	0.0256911	13	1	3	arrhythmic	12	10	0.00534941	7	6
OG0005015	Lthed_scf0080.1_g073570.1	Qgl_scf0070.1_g039640.1	AT5G18390.1	AT5G18390.1	0.188727	23	1	2	arrhythmic	21	10	0.496031	23	17	15	arrhythmic	21	1	0.994872	7	5	5	arrhythmic	6	9	0.455927	7	5	4	arrhythmic	6	9	0.00151229	23	15	11	arrhythmic	21	11	0.202825	19	2	1	arrhythmic	17	11	0.332791	10	9
OG0005016	Lthed_scf0080.1_g069710.1	Qgl_scf0070.1_g044880.1	AT5G64300.1	AT5G64300.1	2.97531e-05	14	8	10	annual	13	5	0.803183	12	8	5	arrhythmic	11	5	0.00330687	23	13	3	arrhythmic	21	4	0.317185	11	11	7	arrhythmic	10	2	1.37586e-05	12	7	10	annual	11	4	1.66184e-06	14	9	7	annual	13	6	0.0691909	11	4
OG0005017	Lthed_scf0080.1_g069590.1	Qgl_scf0070.1_g044940.1	AT2G14095.1	AT2G14095.1	1	12	9	7	arrhythmic	11	6	0.013084	11	2	4	arrhythmic	10	11	1	14	13	9	arrhythmic	13	4	0.123385	23	15	9	arrhythmic	21	6	0.0219669	11	11	6	arrhythmic	10	8	4.45217e-05	13	1	4	annual	12	10	0.185755	15	6
OG0005019	Lthed_scf0080.1_g066010.1	Qgl_scf0070.1_g050190.1	AT4G33650.1	AT4G33650.1	0.00566418	13	9	9	annual	12	6	0.0404874	15	10	8	arrhythmic	14	7	0.318061	7	5	4	arrhythmic	6	9	0.997827	9	4	5	arrhythmic	8	8	0.922185	6	2	1	arrhythmic	6	11	1.49644e-05	13	12	5	annual	12	9	0.0891206	14	12
OG0005020	Lthed_scf0080.1_g065970.1	Qgl_scf0070.1_g050310.1	AT5G09570.1	AT5G09570.1	0.0140689	13	8	12	arrhythmic	12	5	0.00865489	13	13	3	annual	12	10	0.0379245	14	3	7	arrhythmic	13	7	0.935178	7	2	4	arrhythmic	6	6	0.00428129	12	10	6	annual	11	7	1.55817e-06	15	10	9	annual	14	7	0.0983229	14	12
OG0005021	Lthed_scf0080.1_g048840.1	Qgl_scf0070.1_g063400.1	AT1G70210.1	AT1G70210.1	0.843836	6	2	4	arrhythmic	6	11	0.0131256	13	13	4	arrhythmic	12	10	0.220227	16	13	13	arrhythmic	15	4	0.00281613	13	2	8	annual	12	6	0.0118148	6	1	4	arrhythmic	6	10	2.40724e-05	13	7	11	annual	12	4	0.107486	14	12
OG0005024	Lthed_scf0080.1_g046370.1	Qgl_scf0070.1_g067980.1	AT1G49970.1	AT1G49970.1	9.8983e-06	14	5	3	annual	13	2	6.05865e-07	13	4	7	annual	12	1	0.00311048	14	8	8	annual	13	12	3.33487e-06	13	11	3	annual	12	2	4.33724e-05	13	5	3	annual	12	2	9.13623e-06	13	3	9	annual	12	12	3.6931e-05	13	9
OG0005025	Lthed_scf0080.1_g040640.1	Qgl_scf0070.1_g070270.1	AT3G19540.1	AT3G19540.1	2.41315e-06	14	8	9	annual	13	5	1.65516e-08	13	11	5	annual	12	8	4.97906e-08	13	1	9	annual	12	5	4.43145e-08	12	3	8	annual	11	7	3.0312e-05	13	12	4	annual	12	9	3.30689e-09	13	11	5	annual	12	8	0.0722619	7	5
OG0005026	Lthed_scf0080.1_g039850.1	Qgl_scf0070.1_g070820.1	AT2G14910.1	AT2G14910.1	0.817322	13	12	5	arrhythmic	12	9	0.058458	21	16	11	arrhythmic	19	12	0.000535877	14	3	10	annual	13	7	0.00102023	13	4	7	annual	12	8	0.0120992	12	6	1	arrhythmic	11	3	1.12976e-06	14	3	8	annual	13	12	0.000479488	13	11
OG0005027	Lthed_scf0080.1_g037610.1	Qgl_scf0070.1_g072550.1	AT4G15480.1	AT4G15480.1	0.0025188	13	1	3	annual	12	10	0.00156176	13	12	4	annual	12	9	8.02114e-06	13	1	10	annual	12	5	0.00157239	12	3	9	annual	11	7	0.00183204	12	7	10	annual	11	4	3.06903e-09	13	12	4	annual	12	9	0.596165	7	5
OG0005028	Lthed_scf0080.1_g035920.1	Qgl_scf0070.1_g074100.1	AT4G34160.1	AT4G34160.1	0.000375163	14	9	9	annual	13	6	1.8673e-06	13	12	4	annual	12	9	0.000540372	14	13	10	annual	13	4	3.08417e-05	13	1	9	annual	12	5	0.0155886	6	1	3	arrhythmic	6	10	0.000148919	13	10	7	annual	12	7	0.00306201	7	5
OG0005029	Lthed_scf0080.1_g034490.1	Qgl_scf0070.1_g075380.1	AT2G15530.7	AT2G15530.7	0.0505375	23	23	8	arrhythmic	21	7	0.353078	14	8	13	arrhythmic	13	5	3.88645e-05	14	7	6	annual	13	11	0.00334949	17	6	4	annual	16	10	0.114028	7	2	4	arrhythmic	6	11	0.0069537	13	4	1	annual	12	1	0.457696	12	3
OG0005030	Lthed_scf0080.1_g033900.1	Qgl_scf0070.1_g075920.1	AT1G49730.1	AT1G49730.1	0.0988827	14	8	13	arrhythmic	13	5	0.023799	10	4	4	arrhythmic	9	1	0.00866727	13	9	8	annual	12	1	0.0710697	7	7	4	arrhythmic	6	11	0.00237182	12	4	6	annual	11	1	0.00115927	14	3	7	annual	13	12	1.74156e-08	13	8
OG0005032	Lthed_scf0010.1_g008160.1	Qgl_scf0020.1_g009590.1	AT1G58060.1	AT1G58060.1	5.01407e-05	13	3	6	annual	12	12	8.28597e-10	13	4	7	annual	12	1	8.62736e-08	13	10	5	annual	12	1	2.48156e-05	13	8	10	annual	12	12	9.15364e-06	12	4	4	annual	11	1	5.03783e-09	13	4	7	annual	12	1	1.97679e-05	12	10
OG0005033	Lthed_scf0010.1_g006840.1	Qgl_scf0020.1_g008430.1	AT1G33980.1	AT1G33980.1	0.12952	19	17	8	arrhythmic	17	1	0.00351032	12	8	4	annual	11	5	0.000121756	13	12	2	annual	12	3	0.0113516	18	4	10	arrhythmic	17	8	1.42399e-05	15	2	5	annual	14	11	8.64739e-13	14	4	6	annual	13	1	0.00102466	13	10
OG0005034	Lthed_scf0010.1_g002890.1	Qgl_scf0020.1_g005320.1	AT2G02570.4	AT2G02570.4	0.0370012	7	4	4	arrhythmic	6	1	0.455805	7	4	3	arrhythmic	6	1	0.325089	7	3	2	arrhythmic	6	7	0.37397	6	4	4	arrhythmic	6	8	0.0939982	12	5	2	arrhythmic	11	2	0.00590627	16	10	9	annual	15	7	0.00561699	6	5
OG0005035	Lthed_scf0010.1_g001610.1	Qgl_scf0020.1_g003650.1	AT2G02500.2	AT2G02500.2	1.19589e-08	13	11	6	annual	12	8	5.21611e-07	13	11	6	annual	12	8	0.00632238	13	3	8	annual	12	7	3.48774e-05	11	5	6	annual	10	9	0.00313181	12	7	10	annual	11	4	1.12524e-08	13	10	7	annual	12	7	0.0248216	14	3
OG0005036	Lthed_scf0060.1_g008510.1	Qgl_scf0090.1_g116800.1	AT5G08570.3	AT5G08570.3	3.05354e-07	14	2	7	annual	13	11	3.93297e-05	14	5	6	annual	13	2	0.0680288	12	10	5	arrhythmic	11	1	0.529244	6	4	4	arrhythmic	6	8	0.0156234	12	5	3	arrhythmic	11	2	0.289324	13	7	6	arrhythmic	12	4	0.0312925	7	7
OG0005037	Lthed_scf0060.1_g008290.1	Qgl_scf0090.1_g116650.1	AT1G50370.1	AT1G50370.1	0.40796	23	12	20	arrhythmic	21	9	0.613012	7	5	3	arrhythmic	6	2	0.00212234	11	2	6	annual	10	6	0.00604087	6	4	4	half-annual	6	8	0.0381091	23	19	2	arrhythmic	21	3	0.079198	12	9	6	arrhythmic	11	6	0.979684	6	6
OG0005039	Lthed_scf0060.1_g098730.1	Qgl_scf0090.1_g022950.1	AT5G08550.1	AT5G08550.1	0.0123068	21	17	13	arrhythmic	19	1	0.00188481	14	3	7	annual	13	12	0.00017937	14	11	2	annual	13	2	0.134812	13	11	3	arrhythmic	12	2	0.392235	11	4	7	arrhythmic	10	1	1.24622e-06	16	4	5	annual	15	1	4.25354e-07	13	11
OG0005040	Lthed_scf0060.1_g091390.1	Qgl_scf0090.1_g030060.1	AT3G25840.1	AT3G25840.1	0.0223896	18	3	5	arrhythmic	17	12	0.399258	17	3	11	arrhythmic	16	12	0.00327651	13	8	7	annual	12	12	0.733676	22	20	14	arrhythmic	20	11	0.000772066	12	5	2	annual	11	2	0.000504267	12	5	3	annual	11	2	0.000516828	12	10
OG0005042	Lthed_scf0010.1_g129820.1	Qgl_scf0020.1_g122330.1	AT1G71710.1	AT1G71710.2	0.000361621	13	4	2	annual	12	1	1.37619e-07	14	2	7	annual	13	11	6.61988e-06	13	9	8	annual	12	1	2.33124e-06	13	9	5	annual	12	12	0.026292	13	2	3	arrhythmic	12	11	0.0341287	13	2	7	arrhythmic	12	11	0.158541	7	3
OG0005043	Lthed_scf0010.1_g143360.1	Qgl_scf0020.1_g121420.1	AT1G71695.1	AT1G71695.1	1	5	2	1	arrhythmic	5	11	0.182338	13	4	7	arrhythmic	12	1	0.0518639	15	8	9	arrhythmic	14	12	0.000294842	12	11	5	annual	11	2	1	13	6	3	arrhythmic	12	3	0.00477696	13	4	7	annual	12	1	1.23084e-06	14	10
OG0005044	Lthed_scf0100.1_g065320.1	Qgl_scf0100.1_g048350.1	AT5G64740.1	AT5G64740.1	2.74177e-07	13	9	8	annual	12	6	2.23367e-10	13	12	5	annual	12	9	0.0252692	13	1	9	arrhythmic	12	5	0.97991	7	1	5	arrhythmic	6	5	5.9727e-07	12	9	8	annual	11	6	1.09536e-12	13	11	6	annual	12	8	2.17697e-05	13	3
OG0005045	Lthed_scf0010.1_g156540.1	Qgl_scf0020.1_g160190.1	AT3G43660.1	AT3G43660.1	1	12	9	9	arrhythmic	11	6	0.0872739	14	10	7	arrhythmic	13	7	0.0857897	11	4	5	arrhythmic	10	8	0.0019881	13	3	7	annual	12	7	2.50184e-08	13	10	6	annual	12	7	2.11568e-06	13	13	4	annual	12	10	5.83408e-05	12	3
OG0005046	Lthed_scf0010.1_g156150.1	Qgl_scf0020.1_g160500.1	AT4G38470.3	AT4G38470.2	0.00168421	12	5	4	annual	11	2	0.28219	13	9	1	arrhythmic	12	6	0.156604	14	9	4	arrhythmic	13	1	5.43433e-06	12	9	6	annual	11	12	0.161898	6	5	2	arrhythmic	6	2	0.0139046	8	3	5	arrhythmic	7	12	0.484441	7	3
OG0005047	Lthed_scf0010.1_g156090.1	Qgl_scf0020.1_g160550.1	AT1G21320.2	AT1G21320.2	0.430898	11	3	4	arrhythmic	10	12	0.218091	14	5	6	arrhythmic	13	2	0.167389	14	7	5	arrhythmic	13	11	0.00432789	13	7	3	annual	12	11	0.171843	7	3	4	arrhythmic	6	12	0.279416	13	6	5	arrhythmic	12	3	0.878255	6	6
OG0005048	Lthed_scf0010.1_g155420.1	Qgl_scf0020.1_g161480.1	AT1G21370.2	AT1G21370.2	3.14316e-06	15	9	10	annual	14	6	0.000300665	13	11	5	annual	12	8	3.59295e-05	14	13	10	annual	13	4	0.802561	13	1	7	arrhythmic	12	5	0.00358465	14	8	10	annual	13	5	7.98315e-05	13	12	4	annual	12	9	0.00188474	14	13
OG0005049	Lthed_scf0010.1_g154540.1	Qgl_scf0020.1_g163160.1	AT4G08350.1	AT4G08350.1	0.00653602	18	3	5	arrhythmic	17	12	3.53919e-07	13	4	8	annual	12	1	0.135209	7	3	3	arrhythmic	6	7	0.0113079	13	9	9	arrhythmic	12	12	0.0070252	12	5	2	annual	11	2	9.49844e-10	13	4	4	annual	12	1	0.0576113	12	11
OG0005050	Lthed_scf0090.1_g053530.1	Qgl_scf0060.1_g060920.1	AT1G43850.2	AT1G43850.2	0.196049	7	3	4	arrhythmic	6	12	0.049303	6	4	2	arrhythmic	6	1	0.981407	6	6	1	arrhythmic	6	10	0.0436372	19	4	10	arrhythmic	17	8	0.0574361	10	4	5	arrhythmic	9	1	5.12447e-09	13	4	5	annual	12	1	1.35684e-05	14	10
OG0005051	Lthed_scf0090.1_g054530.1	Qgl_scf0060.1_g059660.1	AT1G77000.2	AT1G77000.2	0.996998	5	5	3	arrhythmic	5	2	0.00039713	12	8	4	annual	11	5	0.565518	7	5	1	arrhythmic	6	9	0.00225771	12	10	8	annual	11	1	0.000169539	6	6	1	half-annual	6	3	0.0809792	6	6	2	arrhythmic	6	3	0.00221019	7	3
OG0005053	Lthed_scf0090.1_g055080.1	Qgl_scf0060.1_g059200.1	AT1G21380.1	AT1G21380.1	0.002142	23	16	16	arrhythmic	21	12	0.14333	12	8	6	arrhythmic	11	5	0.0337859	23	16	17	arrhythmic	21	7	0.000780371	12	11	8	annual	11	2	0.00491626	13	4	2	annual	12	1	0.0145203	15	1	7	arrhythmic	14	10	0.0541855	7	3
OG0005054	Lthed_scf0090.1_g059080.1	Qgl_scf0060.1_g053460.1	AT1G77300.1	AT1G77300.1	0.0461406	13	8	7	arrhythmic	12	5	0.124576	12	12	3	arrhythmic	11	9	0.917986	13	1	1	arrhythmic	12	5	0.176098	11	3	4	arrhythmic	10	7	0.0680402	4	4	1	arrhythmic	4	1	0.944534	9	4	2	arrhythmic	8	1	0.463554	23	23
OG0005055	Lthed_scf0090.1_g060600.1	Qgl_scf0060.1_g051760.1	AT1G21660.1	AT1G21660.1	0.588894	13	9	8	arrhythmic	12	6	0.00218443	13	12	6	annual	12	9	0.48997	14	13	13	arrhythmic	13	4	0.0349363	13	1	10	arrhythmic	12	5	1.10397e-05	11	9	7	annual	10	6	1.34306e-07	13	1	3	annual	12	10	0.0562585	19	13
OG0005058	Lthed_scf0010.1_g199760.1	Qgl_scf0020.1_g192830.1	AT5G11960.1	AT5G11960.1	0.727237	6	4	3	arrhythmic	6	1	0.037584	17	17	6	arrhythmic	16	1	0.0367278	14	14	2	arrhythmic	13	5	0.070003	20	16	1	arrhythmic	18	7	0.00812066	13	3	8	annual	12	12	0.499991	11	1	5	arrhythmic	10	10	0.26301	12	8
OG0005059	Lthed_scf0010.1_g199490.1	Qgl_scf0020.1_g192630.1	AT2G26170.1	AT2G26170.1	0.00409539	13	4	7	annual	12	1	0.0605382	13	3	11	arrhythmic	12	12	2.11299e-07	14	8	9	annual	13	12	0.252096	7	1	3	arrhythmic	6	5	0.980624	15	9	10	arrhythmic	14	6	0.0697302	13	12	6	arrhythmic	12	9	0.0448616	7	1
OG0005060	Lthed_scf0010.1_g198130.1	Qgl_scf0020.1_g191780.1	AT2G25940.1	AT4G32940.1	0.293847	9	3	5	arrhythmic	8	12	7.39365e-06	14	9	7	annual	13	6	0.422159	7	5	2	arrhythmic	6	9	0.6714	19	12	11	arrhythmic	17	3	0.0694581	13	5	1	arrhythmic	12	2	0.00490033	13	1	7	annual	12	10	0.00887982	7	1
OG0005061	Lthed_scf0010.1_g197690.1	Qgl_scf0020.1_g191500.1	AT2G25930.1	AT2G25930.1	3.05442e-11	13	4	9	annual	12	1	2.13332e-07	15	3	7	annual	14	12	1.37722e-05	13	8	12	annual	12	12	4.10515e-07	12	9	9	annual	11	12	1.20107e-06	13	4	7	annual	12	1	0.00130047	13	3	11	annual	12	12	0.00100901	14	10
OG0005062	Lthed_scf0010.1_g196800.1	Qgl_scf0020.1_g191020.1	AT3G05200.1	AT3G05200.1	0.456762	4	2	2	arrhythmic	4	11	0.973662	23	10	6	arrhythmic	21	7	0.987706	11	8	5	arrhythmic	10	12	0.0176558	14	1	8	arrhythmic	13	5	2.85317e-05	13	10	7	annual	12	7	9.6767e-05	13	9	8	annual	12	6	0.236438	11	10
OG0005063	Lthed_scf0010.1_g196360.1	Qgl_scf0020.1_g190690.1	AT4G40060.1	AT4G40060.1	0.0140253	15	3	6	arrhythmic	14	12	0.000100251	12	5	9	annual	11	2	0.00168063	14	12	1	annual	13	3	2.2538e-08	14	10	10	annual	13	1	0.0458401	14	4	8	arrhythmic	13	1	3.27668e-09	13	4	11	annual	12	1	2.74589e-06	14	11
OG0005064	Lthed_scf0010.1_g193540.1	Qgl_scf0020.1_g187910.1	AT5G43060.1	AT5G43060.1	0.228044	15	4	4	arrhythmic	14	1	0.985017	9	4	2	arrhythmic	8	1	0.000181642	14	12	1	annual	13	3	0.00198369	11	1	5	annual	10	5	0.0030183	6	3	3	half-annual	6	12	0.0247358	13	1	4	arrhythmic	12	10	0.000288622	13	10
OG0005067	Lthed_scf0010.1_g186680.1	Qgl_scf0020.1_g180110.1	AT1G47550.1	AT1G47550.1	0.313251	11	1	3	arrhythmic	10	10	0.00199556	13	4	5	annual	12	1	0.00805721	17	13	12	annual	16	4	0.0507303	13	1	10	arrhythmic	12	5	0.000280167	12	11	7	annual	11	8	3.77256e-06	13	12	6	annual	12	9	9.9336e-05	14	14
OG0005068	Lthed_scf0010.1_g184890.1	Qgl_scf0020.1_g178970.1	AT5G42970.1	AT5G42970.1	0.163378	10	10	5	arrhythmic	9	7	0.0512401	14	12	7	arrhythmic	13	9	0.00959174	13	11	7	annual	12	2	7.35078e-05	13	10	5	annual	12	1	0.0297537	7	6	4	arrhythmic	6	3	0.0141551	23	20	7	arrhythmic	21	4	0.912236	7	5
OG0005069	Lthed_scf0010.1_g183820.1	Qgl_scf0020.1_g178130.1	AT1G75210.1	AT1G75210.1	0.00362502	13	6	6	annual	12	3	0.0532385	12	5	7	arrhythmic	11	2	0.22453	7	4	2	arrhythmic	6	8	0.0186651	13	11	5	arrhythmic	12	2	9.79118e-05	11	5	8	annual	10	2	0.000113833	13	7	7	annual	12	4	8.47622e-05	14	12
OG0005071	Lthed_scf0060.1_g087830.1	Qgl_scf0090.1_g033630.1	AT1G68530.1	AT1G68530.1	1.88768e-12	13	9	8	annual	12	6	5.7399e-10	13	12	4	annual	12	9	6.44732e-09	13	1	9	annual	12	5	1.23759e-07	13	3	6	annual	12	7	0.00284839	12	9	6	annual	11	6	6.3435e-08	13	13	3	annual	12	10	0.000106391	13	5
OG0005072	Lthed_scf0060.1_g084910.1	Qgl_scf0090.1_g036460.1	AT1G68480.1	AT1G68480.1	0.148091	9	1	5	arrhythmic	8	10	0.0753266	20	6	18	arrhythmic	18	3	0.27993	17	10	14	arrhythmic	16	1	0.00334778	15	2	6	annual	14	6	0.487246	15	4	3	arrhythmic	14	1	0.158949	7	4	3	arrhythmic	6	1	0.0011484	13	12
OG0005076	Lthed_scf0090.1_g062750.1	Qgl_scf0060.1_g049270.1	AT3G57040.2	AT3G57040.2	0.000794983	13	5	7	annual	12	2	0.000775291	15	6	5	annual	14	3	0.00869243	14	11	6	annual	13	2	0.00851051	12	11	6	annual	11	2	9.22477e-05	15	10	9	annual	14	7	0.347905	7	6	4	arrhythmic	6	3	0.10989	13	1
OG0005077	Lthed_scf0070.1_g040380.1	Qgl_scf0080.1_g034650.1	AT5G60910.1	AT5G60910.1	0.0333148	14	8	13	arrhythmic	13	5	2.30477e-05	13	1	10	annual	12	10	0.00204082	23	15	20	arrhythmic	21	6	0.0794399	15	15	11	arrhythmic	14	6	0.00114339	12	9	7	annual	11	6	7.06136e-07	12	1	8	annual	11	10	0.166157	23	21
OG0005078	Lthed_scf0070.1_g067990.1	Qgl_scf0080.1_g058820.1	AT5G08350.1	AT5G08350.1	0.244985	8	5	3	arrhythmic	7	2	2.51513e-05	12	5	7	annual	11	2	0.00873519	12	2	8	annual	11	6	0.0550301	13	12	3	arrhythmic	12	3	0.723512	17	7	6	arrhythmic	16	4	0.00513119	12	5	6	annual	11	2	0.0924332	12	4
OG0005079	Lthed_scf0070.1_g072330.1	Qgl_scf0080.1_g061730.1	AT1G17820.1	AT1G17820.1	1.7583e-06	14	4	5	annual	13	1	0.0187994	12	5	7	arrhythmic	11	2	0.00136789	13	11	3	annual	12	2	0.000235851	13	9	9	annual	12	12	0.000301814	13	2	9	annual	12	11	1.19033e-08	13	4	7	annual	12	1	0.0104541	13	10
OG0005083	Lthed_scf0070.1_g041510.1	Qgl_scf0080.1_g035270.1	AT5G15740.1	AT5G15740.1	0.00123627	14	8	11	annual	13	5	0.00362076	12	12	10	annual	11	9	0.97433	14	13	13	arrhythmic	13	4	0.0935977	6	3	4	arrhythmic	6	7	0.000850034	12	8	9	annual	11	5	0.000102077	13	1	4	annual	12	10	0.0370104	7	6
OG0005084	Lthed_scf0070.1_g046870.1	Qgl_scf0080.1_g039490.1	AT1G73920.1	AT1G73920.1	0.019444	20	4	3	arrhythmic	18	1	1.07263e-05	13	3	9	annual	12	12	0.00607971	14	10	2	annual	13	1	2.01929e-10	13	9	6	annual	12	12	0.00232049	12	4	2	annual	11	1	3.82125e-06	14	2	7	annual	13	11	0.00789576	14	10
OG0005085	Lthed_scf0070.1_g046880.1	Qgl_scf0080.1_g039500.1	AT3G18500.1	AT3G18500.3	3.48946e-07	13	6	4	annual	12	3	0.00158329	13	3	9	annual	12	12	6.19281e-06	12	10	5	annual	11	1	5.80945e-05	13	8	9	annual	12	12	1.84398e-06	12	4	8	annual	11	1	3.28663e-08	13	3	9	annual	12	12	9.05672e-06	15	10
OG0005086	Lthed_scf0070.1_g047040.1	Qgl_scf0080.1_g039550.1	AT1G18450.1	AT1G18450.1	0.00696065	11	8	7	annual	10	5	0.00327139	14	3	8	annual	13	12	0.00135334	13	10	8	annual	12	1	0.10426	14	14	1	arrhythmic	13	5	0.996687	11	8	7	arrhythmic	10	5	9.97988e-05	12	8	6	annual	11	5	6.80194e-05	12	11
OG0005088	Lthed_scf0070.1_g048930.1	Qgl_scf0080.1_g041100.1	AT1G25440.1	AT1G25440.1	0.880285	20	7	8	arrhythmic	18	4	0.00759075	15	10	7	annual	14	7	0.272512	15	4	14	arrhythmic	14	8	0.00678508	16	1	13	annual	15	5	0.890189	12	9	4	arrhythmic	11	6	0.000174955	13	5	7	annual	12	2	0.00505859	16	7
OG0005089	Lthed_scf0060.1_g020510.1	Qgl_scf0090.1_g101730.1	AT3G13600.2	AT3G13600.2	1	19	8	14	arrhythmic	17	5	0.510728	13	6	10	arrhythmic	12	3	0.654568	12	4	5	arrhythmic	11	8	0.188203	17	11	7	arrhythmic	16	2	0.0122769	6	1	4	arrhythmic	6	10	3.60917e-06	13	11	6	annual	12	8	0.223627	12	4
OG0005090	Lthed_scf0070.1_g049650.1	Qgl_scf0080.1_g041510.1	AT3G18370.1	AT3G18370.1	0.0346295	6	4	4	arrhythmic	6	1	0.00558905	6	4	2	half-annual	6	1	0.0116218	13	3	5	arrhythmic	12	7	0.0176773	7	3	4	arrhythmic	6	7	7.71382e-05	6	4	3	half-annual	6	1	0.00095921	13	4	2	annual	12	1	0.000742807	7	3
OG0005091	Lthed_scf0070.1_g049770.1	Qgl_scf0080.1_g041680.1	AT1G48840.1	AT1G48840.1	0.0387939	7	3	5	arrhythmic	6	12	0.0236901	14	2	12	arrhythmic	13	11	0.807008	13	10	4	arrhythmic	12	1	0.879047	22	2	13	arrhythmic	20	6	0.0752097	6	4	3	arrhythmic	6	1	0.000668913	14	2	5	annual	13	11	0.000676986	14	10
OG0005092	Lthed_scf0070.1_g051540.1	Qgl_scf0080.1_g044600.1	AT1G73760.1	AT1G73760.1	0.0210688	13	9	2	arrhythmic	12	6	0.00525637	15	6	10	annual	14	3	8.24337e-05	13	1	3	annual	12	5	0.000194307	13	13	10	annual	12	4	0.0846719	10	9	5	arrhythmic	9	6	2.52462e-06	13	9	9	annual	12	6	0.000171168	14	13
OG0005094	Lthed_scf0070.1_g052660.1	Qgl_scf0080.1_g045530.1	AT2G29420.1	AT2G29420.1	1	13	1	8	arrhythmic	12	10	0.999938	7	4	4	arrhythmic	6	1	0.000685989	15	11	4	annual	14	2	0.000128677	19	11	3	arrhythmic	17	2	0.999516	14	12	10	arrhythmic	13	9	0.997557	13	9	6	arrhythmic	12	6	0.193588	23	11
OG0005095	Lthed_scf0070.1_g052960.1	Qgl_scf0080.1_g045830.1	AT1G18070.2	AT1G18070.2	4.4163e-06	12	6	1	annual	11	3	0.0269292	14	4	6	arrhythmic	13	1	0.0901915	14	7	13	arrhythmic	13	11	1.17595e-05	13	10	4	annual	12	1	5.64855e-06	12	4	6	annual	11	1	0.0454997	23	4	12	arrhythmic	21	1	0.000148949	14	10
OG0005097	Lthed_scf0070.1_g056560.1	Qgl_scf0080.1_g049830.1	AT3G17980.1	AT3G17980.1	0.0144543	13	10	12	arrhythmic	12	7	0.0497052	13	9	5	arrhythmic	12	6	0.000125041	13	5	5	annual	12	9	0.0254883	13	4	3	arrhythmic	12	8	0.0117875	6	4	4	arrhythmic	6	1	0.0986395	7	3	4	arrhythmic	6	12	0.0541855	7	3
OG0005098	Lthed_scf0070.1_g059520.1	Qgl_scf0080.1_g051720.1	AT1G48540.1	AT1G48540.1	0.86339	12	9	6	arrhythmic	11	6	0.0189131	14	7	6	arrhythmic	13	4	0.165571	13	10	12	arrhythmic	12	1	9.45053e-05	12	10	8	annual	11	1	0.987358	11	3	8	arrhythmic	10	12	0.000185298	15	4	4	annual	14	1	0.00277956	13	11
OG0005099	Lthed_scf0070.1_g060700.1	Qgl_scf0080.1_g053100.1	AT1G73540.1	AT1G73540.1	0.000836934	15	7	10	annual	14	4	3.32157e-05	14	8	10	annual	13	5	0.000337536	14	2	6	annual	13	6	0.287325	12	3	8	arrhythmic	11	7	0.00114973	17	6	13	annual	16	3	0.00143794	13	11	6	annual	12	8	0.0204441	12	4
OG0005100	Lthed_scf0070.1_g064060.1	Qgl_scf0080.1_g056120.1	AT2G02010.2	AT2G02010.2	4.38752e-06	13	4	8	annual	12	1	0.0616282	12	5	4	arrhythmic	11	2	6.93099e-06	14	8	9	annual	13	12	0.00118396	12	8	8	annual	11	12	0.690922	6	4	3	arrhythmic	6	1	1.75323e-06	13	3	6	annual	12	12	0.0113061	15	7
OG0005101	Lthed_scf0070.1_g063070.1	Qgl_scf0080.1_g055060.1	AT1G48410.1	AT1G48410.1	0.352174	10	7	7	arrhythmic	9	4	0.668006	13	2	8	arrhythmic	12	11	0.474596	20	4	14	arrhythmic	18	8	0.102026	16	14	14	arrhythmic	15	5	0.528595	6	1	4	arrhythmic	6	10	0.136556	14	11	3	arrhythmic	13	8	0.0123296	14	7
OG0005102	Lthed_scf0120.1_g080390.1	Qgl_scf0120.1_g071430.1	AT1G27600.2	AT1G27600.2	0.0291914	7	2	3	arrhythmic	6	11	0.0494926	20	16	11	arrhythmic	18	12	0.217663	12	3	7	arrhythmic	11	7	0.000711347	13	13	10	annual	12	4	0.00392165	22	14	16	arrhythmic	20	10	0.0301884	15	1	7	arrhythmic	14	10	0.00412636	15	2
OG0005103	Lthed_scf0120.1_g080620.1	Qgl_scf0120.1_g071500.1	AT1G09970.1	AT1G09970.1	0.0472224	11	10	4	arrhythmic	10	7	0.000661601	14	5	5	annual	13	2	7.06346e-05	13	11	5	annual	12	2	2.68478e-05	13	10	8	annual	12	1	0.0186251	12	5	7	arrhythmic	11	2	0.00451493	13	4	6	annual	12	1	0.143514	13	1
OG0005104	Lthed_scf0080.1_g095170.1	Qgl_scf0070.1_g018520.1	AT5G35320.1	AT5G35320.1	0.0771862	13	12	4	arrhythmic	12	9	0.0943841	6	6	3	arrhythmic	6	3	0.000208011	14	3	7	annual	13	7	7.36003e-05	16	10	9	annual	15	1	7.72176e-05	6	5	3	half-annual	6	2	0.311937	10	6	5	arrhythmic	9	3	0.623147	17	1
OG0005105	Lthed_scf0080.1_g095420.1	Qgl_scf0070.1_g018170.1	AT5G35330.4	AT5G35330.4	0.00230498	20	16	10	arrhythmic	18	12	0.000210929	16	16	9	annual	15	12	0.0157392	12	11	6	arrhythmic	11	2	0.000268093	13	10	5	annual	12	1	1.58077e-07	12	4	3	annual	11	1	6.13797e-08	13	4	5	annual	12	1	0.00232504	12	11
OG0005106	Lthed_scf0080.1_g095600.1	Qgl_scf0070.1_g017770.1	AT1G30330.3	AT1G19220.1	9.4228e-07	13	9	5	annual	12	6	0.677357	4	4	2	arrhythmic	4	1	0.0013595	13	13	7	annual	12	4	8.24971e-05	10	3	4	annual	9	7	0.00220426	10	3	6	annual	9	12	0.0673637	13	1	8	arrhythmic	12	10	1.20576e-05	14	11
OG0005107	Lthed_scf0080.1_g096680.1	Qgl_scf0070.1_g014550.1	AT2G07180.2	AT2G07180.2	0.473271	11	8	5	arrhythmic	10	5	0.168435	11	5	4	arrhythmic	10	2	0.947104	7	7	4	arrhythmic	6	11	0.988943	6	4	4	arrhythmic	6	8	0.0284193	11	8	8	arrhythmic	10	5	0.00518387	13	13	3	annual	12	10	0.014099	14	12
OG0005108	Lthed_scf0010.1_g020190.1	Qgl_scf0020.1_g019570.1	AT4G30790.1	AT4G30790.1	0.0836773	23	19	19	arrhythmic	21	3	0.120614	13	9	5	arrhythmic	12	6	0.000137819	13	11	3	annual	12	2	8.45942e-05	14	8	11	annual	13	12	0.00176713	6	4	3	half-annual	6	1	0.0995623	21	3	18	arrhythmic	19	12	0.0681449	7	3
OG0005109	Lthed_scf0010.1_g020920.1	Qgl_scf0020.1_g020230.1	AT2G24060.1	AT2G24060.1	0.203381	7	6	3	arrhythmic	6	3	0.169753	15	10	7	arrhythmic	14	7	0.00103291	14	3	10	annual	13	7	0.0517456	11	7	4	arrhythmic	10	11	0.223101	6	6	2	arrhythmic	6	3	0.0792793	15	3	9	arrhythmic	14	12	0.0284925	7	3
OG0005111	Lthed_scf0010.1_g022980.1	Qgl_scf0020.1_g022380.1	AT2G24270.4	AT2G24270.3	0.000166426	15	11	6	annual	14	8	7.76961e-07	14	12	4	annual	13	9	8.86787e-05	13	5	3	annual	12	9	1.23686e-05	13	3	7	annual	12	7	0.00845984	10	9	4	annual	9	6	8.33239e-05	14	11	4	annual	13	8	0.0243869	18	16
OG0005112	Lthed_scf0010.1_g023280.1	Qgl_scf0020.1_g022490.1	AT4G30993.2	AT4G30993.2	0.00221324	12	11	5	annual	11	8	3.77259e-05	13	10	8	annual	12	7	0.000291638	15	12	11	annual	14	3	4.66051e-06	13	3	7	annual	12	7	0.0113468	12	1	3	arrhythmic	11	10	1.469e-07	13	1	2	annual	12	10	0.00331828	14	13
OG0005114	Lthed_scf0010.1_g023690.1	Qgl_scf0020.1_g022640.1	AT5G58200.2	AT5G58200.2	1.06961e-09	13	11	5	annual	12	8	2.76156e-10	14	11	5	annual	13	8	0.00454429	14	4	5	annual	13	8	6.8216e-05	12	6	5	annual	11	10	6.78764e-07	12	11	5	annual	11	8	0.000527673	14	11	5	annual	13	8	0.945193	15	10
OG0005115	Lthed_scf0010.1_g026070.1	Qgl_scf0020.1_g026110.1	AT2G46490.1	AT2G46490.1	0.00125589	15	9	9	annual	14	6	0.037929	12	12	3	arrhythmic	11	9	0.999865	14	13	7	arrhythmic	13	4	0.841287	6	3	4	arrhythmic	6	7	0.388658	17	8	9	arrhythmic	16	5	1.68644e-07	13	11	5	annual	12	8	0.607944	9	6
OG0005116	Lthed_scf0010.1_g026640.1	Qgl_scf0020.1_g026560.1			1	23	11	8	arrhythmic	21	8	0.999999	4	4	1	arrhythmic	4	1	1	4	4	2	arrhythmic	4	8	1	14	7	6	arrhythmic	13	11	7.19053e-05	13	7	10	annual	12	4	0.0895557	13	7	7	arrhythmic	12	4	0.375484	11	8
OG0005117	Lthed_scf0070.1_g076750.1	Qgl_scf0080.1_g068890.1	AT5G23610.2	AT5G23610.2	0.106252	12	12	4	arrhythmic	11	9	9.15222e-06	13	11	6	annual	12	8	0.205995	15	1	10	arrhythmic	14	5	1.64195e-06	13	3	8	annual	12	7	0.00903832	6	5	3	half-annual	6	2	0.0700045	7	4	3	arrhythmic	6	1	0.987881	5	2
OG0005122	Lthed_scf0030.1_g153090.1	Qgl_scf0010.1_g008790.1	AT3G52120.3	AT3G52120.3	0.191576	23	17	14	arrhythmic	21	1	0.296	23	16	14	arrhythmic	21	12	0.0195186	12	6	1	arrhythmic	11	10	0.942841	6	4	3	arrhythmic	6	8	0.00142856	13	4	7	annual	12	1	0.0849871	11	10	6	arrhythmic	10	7	7.04742e-06	14	10
OG0005126	Lthed_scf0030.1_g147990.1	Qgl_scf0010.1_g013490.1	AT3G63500.3	AT3G63500.3	0.295374	10	3	5	arrhythmic	9	12	0.992335	6	4	3	arrhythmic	6	1	0.176186	14	10	3	arrhythmic	13	1	0.639669	10	3	2	arrhythmic	9	7	0.00417141	6	5	2	half-annual	6	2	0.00261099	12	4	3	annual	11	1	0.117241	7	3
OG0005127	Lthed_scf0030.1_g146670.1	Qgl_scf0010.1_g016200.1	AT5G13710.2	AT5G13710.2	3.9304e-08	12	10	9	annual	11	7	9.61959e-07	12	12	7	annual	11	9	2.12804e-06	14	14	10	annual	13	5	2.92584e-05	13	2	8	annual	12	6	6.1332e-06	12	10	6	annual	11	7	3.98913e-08	14	9	9	annual	13	6	0.198827	8	4
OG0005130	Lthed_scf0030.1_g141340.1	Qgl_scf0010.1_g029960.1	AT1G34570.1	AT1G34570.1	0.11628	23	4	17	arrhythmic	21	1	0.00909748	23	4	16	arrhythmic	21	1	0.978571	6	5	1	arrhythmic	6	9	3.54736e-06	13	5	4	annual	12	9	0.00102797	12	5	3	annual	11	2	0.0120081	13	4	8	arrhythmic	12	1	1.90212e-05	14	10
OG0005133	Lthed_scf0030.1_g139900.1	Qgl_scf0010.1_g033500.1	AT3G54470.1	AT3G54470.1	0.0245166	13	12	5	arrhythmic	12	9	0.0012663	19	7	12	arrhythmic	17	4	0.00536683	13	1	10	annual	12	5	0.0053836	12	7	3	annual	11	11	0.519765	6	5	4	arrhythmic	6	2	0.0258276	23	8	12	arrhythmic	21	5	0.00795273	14	9
OG0005135	Lthed_scf0030.1_g134570.1	Qgl_scf0010.1_g040830.1	AT3G12270.1	AT3G12270.1	1.13095e-05	13	2	10	annual	12	11	5.23075e-07	13	2	9	annual	12	11	0.149499	13	8	11	arrhythmic	12	12	0.115402	16	7	6	arrhythmic	15	11	8.43129e-07	12	3	9	annual	11	12	4.2485e-06	12	5	7	annual	11	2	0.000126913	13	11
OG0005137	Lthed_scf0030.1_g131760.1	Qgl_scf0010.1_g044110.1	AT1G74110.1	AT2G46660.1	0.0283808	12	4	6	arrhythmic	11	1	0.0673019	14	2	12	arrhythmic	13	11	0.13075	12	6	2	arrhythmic	11	10	0.046399	6	4	5	arrhythmic	6	8	0.288582	6	3	3	arrhythmic	6	12	0.000123307	13	3	8	annual	12	12	1.41603e-05	14	9
OG0005138	Lthed_scf0030.1_g131700.1	Qgl_scf0010.1_g044160.1	AT3G12480.1	AT3G12480.1	0.149202	23	3	16	arrhythmic	21	12	0.144063	23	5	12	arrhythmic	21	2	0.0938922	15	4	9	arrhythmic	14	8	0.554617	18	5	2	arrhythmic	17	9	0.0179481	11	4	3	arrhythmic	10	1	0.125055	12	6	1	arrhythmic	11	3	0.0143723	14	11
OG0005139	Lthed_scf0030.1_g130530.1	Qgl_scf0010.1_g045970.1	AT1G73100.1	AT1G73100.1	0.8401	13	13	4	arrhythmic	12	10	0.159031	7	7	4	arrhythmic	6	4	0.472506	14	7	10	arrhythmic	13	11	0.120249	13	13	11	arrhythmic	12	4	0.268373	11	6	2	arrhythmic	10	3	2.41768e-05	13	3	8	annual	12	12	0.106223	14	7
OG0005140	Lthed_scf0030.1_g121140.1	Qgl_scf0010.1_g057440.1	AT2G44710.2	AT2G44710.2	9.02379e-10	13	5	4	annual	12	2	5.78668e-11	13	4	8	annual	12	1	1.66299e-06	12	12	3	annual	11	3	0.000781682	12	10	7	annual	11	1	1.6678e-11	12	4	4	annual	11	1	8.4602e-10	13	4	7	annual	12	1	1.06612e-06	13	9
OG0005141	Lthed_scf0030.1_g118760.1	Qgl_scf0010.1_g061590.1	AT2G44900.2	AT2G44900.2	0.229635	13	4	5	arrhythmic	12	1	2.43975e-05	13	3	10	annual	12	12	0.00661579	12	12	2	annual	11	3	0.0917943	23	21	21	arrhythmic	21	11	0.027304	12	4	3	arrhythmic	11	1	6.66967e-06	13	4	4	annual	12	1	0.0388897	8	8
OG0005142	Lthed_scf0030.1_g118620.1	Qgl_scf0010.1_g061770.1	AT3G60390.1	AT3G60390.1	0.626087	12	11	5	arrhythmic	11	8	0.156357	13	12	3	arrhythmic	12	9	0.0368875	13	5	6	arrhythmic	12	9	0.00528571	12	6	4	annual	11	10	0.13387	9	9	4	arrhythmic	8	6	1.50451e-06	13	8	8	annual	12	5	0.234656	14	2
OG0005144	Lthed_scf0030.1_g112320.1	Qgl_scf0010.1_g068020.1	AT1G02060.1	AT1G02060.1	0.00887799	11	11	6	annual	10	8	0.316948	23	1	16	arrhythmic	21	10	0.000783674	13	5	6	annual	12	9	0.754477	5	5	3	arrhythmic	5	9	0.0593648	13	10	7	arrhythmic	12	7	1.11794e-05	13	4	6	annual	12	1	0.236128	15	3
OG0005145	Lthed_scf0030.1_g112340.1	Qgl_scf0010.1_g067840.1	AT2G44950.1	AT2G44950.1	0.140181	7	3	5	arrhythmic	6	12	7.90794e-06	13	3	9	annual	12	12	0.915261	7	3	3	arrhythmic	6	7	0.00414179	13	8	10	annual	12	12	0.00988146	12	4	3	annual	11	1	1.13227e-08	13	3	7	annual	12	12	2.23317e-05	13	11
OG0005146	Lthed_scf0030.1_g109730.1	Qgl_scf0010.1_g070570.1	AT1G02065.1	AT1G02065.1	0.252576	10	8	5	arrhythmic	9	5	0.13054	18	1	4	arrhythmic	17	10	0.0362754	6	1	4	arrhythmic	6	5	0.292287	10	3	9	arrhythmic	9	7	0.0919948	6	2	3	arrhythmic	6	11	0.000261705	13	11	5	annual	12	8	1.10327e-08	14	13
OG0005148	Lthed_scf0030.1_g108890.1	Qgl_scf0010.1_g071340.1	AT3G60580.1	AT3G60580.1	0.0363318	13	6	11	arrhythmic	12	3	0.000524948	13	6	11	annual	12	3	0.0415411	14	13	11	arrhythmic	13	4	1.48292e-07	13	4	6	annual	12	8	0.00182131	14	7	9	annual	13	4	0.921729	14	1	1	arrhythmic	13	10	0.159107	12	4
OG0005149	Lthed_scf0030.1_g098520.1	Qgl_scf0010.1_g082330.1	AT5G04500.1	AT5G04500.1	3.22195e-10	13	10	6	annual	12	7	5.40592e-11	14	9	7	annual	13	6	5.10704e-07	15	15	9	annual	14	6	2.87779e-10	13	2	7	annual	12	6	5.70057e-08	13	9	7	annual	12	6	2.21028e-08	15	9	8	annual	14	6	8.9092e-07	15	14
OG0005151	Lthed_scf0030.1_g097020.1	Qgl_scf0010.1_g084570.1	AT4G40070.1	AT4G40070.1	2.35679e-09	12	11	5	annual	11	8	1.08314e-11	13	12	4	annual	12	9	4.50051e-06	13	3	8	annual	12	7	3.58452e-08	13	3	6	annual	12	7	0.0280265	12	8	8	arrhythmic	11	5	0.10049	13	13	2	arrhythmic	12	10	0.00030792	13	6
OG0005154	Lthed_scf0030.1_g089960.1	Qgl_scf0010.1_g095000.1	AT3G54260.1	AT3G54260.1	0.00860125	13	9	7	annual	12	6	3.48774e-09	13	11	5	annual	12	8	0.00253545	12	3	8	annual	11	7	5.40292e-07	13	3	7	annual	12	7	1.13039e-09	12	8	8	annual	11	5	2.8997e-07	13	11	6	annual	12	8	4.14031e-11	14	13
OG0005155	Lthed_scf0030.1_g087330.1	Qgl_scf0010.1_g099090.1	AT3G54300.3	AT3G54300.3	0.166413	17	14	12	arrhythmic	16	10	0.0699476	6	4	3	arrhythmic	6	1	0.0980041	7	5	1	arrhythmic	6	9	0.118182	23	13	7	arrhythmic	21	4	0.227628	12	5	1	arrhythmic	11	2	0.00125062	13	4	4	annual	12	1	0.374234	9	6
OG0005157	Lthed_scf0030.1_g085810.1	Qgl_scf0010.1_g100370.1	AT5G04830.2	AT5G04830.2	3.8172e-07	14	4	5	annual	13	1	1.0785e-06	12	4	8	annual	11	1	0.000940678	12	9	6	annual	11	1	2.36935e-05	13	10	4	annual	12	1	0.0314824	14	1	9	arrhythmic	13	10	0.000153588	14	2	7	annual	13	11	0.0022509	14	10
OG0005159	Lthed_scf0030.1_g081790.1	Qgl_scf0010.1_g103390.1	AT5G04870.1	AT5G04870.1	6.78098e-05	13	8	10	annual	12	5	0.0320312	12	12	2	arrhythmic	11	9	0.000277962	14	13	11	annual	13	4	0.0377102	14	13	10	arrhythmic	13	4	0.000741674	13	7	11	annual	12	4	6.54393e-07	13	12	6	annual	12	9	0.000345858	13	1
OG0005160	Lthed_scf0060.1_g035860.1	Qgl_scf0090.1_g081060.1	AT5G06390.1	AT5G06390.1	0.147943	6	2	4	arrhythmic	6	11	0.156384	18	6	12	arrhythmic	17	3	0.153096	7	6	3	arrhythmic	6	10	1.18658e-05	13	1	10	annual	12	5	0.000199856	6	2	3	half-annual	6	11	1.42013e-05	13	1	3	annual	12	10	0.0501129	14	13
OG0005161	Lthed_scf0030.1_g078790.1	Qgl_scf0010.1_g106840.1	AT3G54320.3	AT3G54320.3	1	7	1	4	arrhythmic	6	10	1	13	11	10	arrhythmic	12	8	0.253291	14	13	10	arrhythmic	13	4	0.154358	9	6	6	arrhythmic	8	10	0.0323156	10	2	5	arrhythmic	9	11	2.87664e-08	13	1	4	annual	12	10	0.0274457	12	6
OG0005163	Lthed_scf0030.1_g078150.1	Qgl_scf0010.1_g107550.1	AT5G04980.2	AT5G04980.2	0.0460029	13	6	3	arrhythmic	12	3	0.000284269	13	10	5	annual	12	7	0.19873	23	20	9	arrhythmic	21	11	0.00410964	14	3	12	annual	13	7	0.00775966	13	5	7	annual	12	2	0.0209384	23	20	7	arrhythmic	21	4	0.547859	8	7
OG0005167	Lthed_scf0090.1_g095710.1	Qgl_scf0060.1_g010510.1	AT3G07340.1	AT3G07340.1	0.000634293	16	9	8	annual	15	6	0.00455213	12	12	3	annual	11	9	3.22871e-06	13	1	7	annual	12	5	0.0106636	12	11	8	arrhythmic	11	2	2.67921e-05	13	10	7	annual	12	7	0.0207037	14	9	9	arrhythmic	13	6	0.000658619	13	1
OG0005169	Lthed_scf0090.1_g088570.1	Qgl_scf0060.1_g018490.1	AT3G07420.1	AT3G07420.1	1.02527e-06	14	8	13	annual	13	5	0.414882	6	6	2	arrhythmic	6	3	0.2067	21	13	13	arrhythmic	19	4	0.0798238	20	15	7	arrhythmic	18	6	1.71833e-05	12	8	9	annual	11	5	8.44975e-05	13	9	10	annual	12	6	0.307479	7	6
OG0005170	Lthed_scf0090.1_g088600.1	Qgl_scf0060.1_g018440.1	AT3G25400.1	AT3G25400.1	0.00302278	7	2	4	half-annual	6	11	0.621946	12	12	5	arrhythmic	11	9	0.0924538	11	2	4	arrhythmic	10	6	0.0770498	10	3	3	arrhythmic	9	7	0.170472	6	1	3	arrhythmic	6	10	0.0391672	12	10	7	arrhythmic	11	7	0.497136	10	6
OG0005172	Lthed_scf0090.1_g090020.1	Qgl_scf0060.1_g018180.1	AT5G48500.1	AT5G48500.1	1	20	10	9	arrhythmic	18	7	1	12	12	5	arrhythmic	11	9	0.208355	16	11	15	arrhythmic	15	2	0.296229	12	2	10	arrhythmic	11	6	0.0388164	12	6	11	arrhythmic	11	3	0.000513513	13	7	9	annual	12	4	0.000636239	13	1
OG0005173	Lthed_scf0090.1_g088080.1	Qgl_scf0060.1_g019190.1	AT3G25500.1	AT3G25500.1	1.00982e-05	12	10	6	annual	11	7	2.84214e-06	12	12	4	annual	11	9	0.000149181	14	13	10	annual	13	4	0.000477439	13	3	7	annual	12	7	0.000123456	12	9	7	annual	11	6	0.000250951	13	1	2	annual	12	10	8.36796e-09	14	13
OG0005174	Lthed_scf0090.1_g086470.1	Qgl_scf0060.1_g024380.1	AT3G07580.1	AT3G07580.1	0.000909896	14	1	2	annual	13	10	0.00729093	13	13	4	annual	12	10	3.90849e-07	12	4	7	annual	11	8	2.67383e-08	12	4	7	annual	11	8	0.0359553	23	16	16	arrhythmic	21	12	0.264024	5	5	2	arrhythmic	5	2	0.146772	12	5
OG0005175	Lthed_scf0060.1_g045290.1	Qgl_scf0090.1_g074610.1	AT5G10860.1	AT5G10860.1	2.12912e-05	13	11	6	annual	12	8	0.000629021	13	9	8	annual	12	6	1.23705e-06	13	5	4	annual	12	9	6.43556e-07	13	4	5	annual	12	8	0.0163878	6	5	3	arrhythmic	6	2	0.0739529	13	9	11	arrhythmic	12	6	0.585562	7	3
OG0005177	Lthed_scf0060.1_g045700.1	Qgl_scf0090.1_g074320.1	AT5G58270.1	AT5G58270.1	3.95006e-06	17	17	9	annual	16	1	0.000701776	13	4	7	annual	12	1	0.104513	7	2	4	arrhythmic	6	6	6.23331e-07	12	10	5	annual	11	1	0.00197674	13	5	2	annual	12	2	0.000211678	16	3	5	annual	15	12	0.0176351	7	2
OG0005179	Lthed_scf0060.1_g046760.1	Qgl_scf0090.1_g073480.1	AT4G27950.1	AT4G27950.1	0.0195905	12	12	8	arrhythmic	11	9	0.0485086	6	3	2	arrhythmic	6	12	0.110413	6	2	4	arrhythmic	6	6	5.47342e-05	13	6	3	annual	12	10	0.0320351	11	3	5	arrhythmic	10	12	0.0274076	12	3	5	arrhythmic	11	12	0.000518344	14	6
OG0005180	Lthed_scf0060.1_g047020.1	Qgl_scf0090.1_g073120.1	AT2G30470.1	AT2G30470.1	0.00962705	15	1	7	annual	14	10	0.0255873	12	9	4	arrhythmic	11	6	0.0184408	15	12	13	arrhythmic	14	3	0.559533	14	13	8	arrhythmic	13	4	0.420127	13	4	7	arrhythmic	12	1	0.98757	9	4	2	arrhythmic	8	1	0.275444	11	6
OG0005181	Lthed_scf0060.1_g047800.1	Qgl_scf0090.1_g072210.1	AT2G40610.1	AT2G40610.1	1	23	9	9	arrhythmic	21	6	1	6	6	3	arrhythmic	6	3	1	14	13	6	arrhythmic	13	4	1	17	1	5	arrhythmic	16	5	7.46056e-05	6	1	4	half-annual	6	10	0.050316	6	1	3	arrhythmic	6	10	0.0084146	7	5
OG0005182	Lthed_scf0060.1_g047940.1	Qgl_scf0090.1_g072140.1	AT1G06890.2	AT1G06890.2	0.554716	12	8	3	arrhythmic	11	5	7.35648e-05	14	2	7	annual	13	11	0.00729313	13	11	6	annual	12	2	0.285093	14	8	9	arrhythmic	13	12	0.00116897	6	2	3	half-annual	6	11	0.00109296	14	2	8	annual	13	11	0.192277	6	2
OG0005184	Lthed_scf0060.1_g049550.1	Qgl_scf0090.1_g071060.1	AT2G30300.1	AT2G30300.1	2.09999e-05	12	6	4	annual	11	3	1.08037e-05	11	7	5	annual	10	4	0.182514	13	11	7	arrhythmic	12	2	0.0046645	12	11	4	annual	11	2	0.146036	12	5	2	arrhythmic	11	2	0.18226	7	4	3	arrhythmic	6	1	0.197178	7	3
OG0005188	Lthed_scf0060.1_g078510.1	Qgl_scf0090.1_g040590.1	AT1G07050.1	AT1G07050.1	0.80879	3	1	2	arrhythmic	3	10	0.132081	14	8	3	arrhythmic	13	5	0.945097	8	4	5	arrhythmic	7	8	0.00400367	14	2	7	annual	13	6	0.00148712	13	2	7	annual	12	11	2.47854e-05	13	4	7	annual	12	1	4.00166e-07	13	11
OG0005190	Lthed_scf0060.1_g077710.1	Qgl_scf0090.1_g041120.1	AT1G07080.1	AT1G07080.1	8.86998e-06	19	10	18	arrhythmic	17	7	0.345628	6	4	2	arrhythmic	6	1	0.175303	23	17	10	arrhythmic	21	8	0.00431171	13	5	6	annual	12	9	0.000235703	12	4	3	annual	11	1	3.5819e-08	16	16	9	annual	15	12	0.0101572	14	10
OG0005192	Lthed_scf0060.1_g077000.1	Qgl_scf0090.1_g041860.1	AT2G30100.1	AT2G30100.1	0.232309	22	5	3	arrhythmic	20	2	0.446983	23	2	15	arrhythmic	21	11	0.000252251	13	8	5	annual	12	12	0.805625	6	4	5	arrhythmic	6	8	6.59472e-06	6	5	2	half-annual	6	2	0.0773337	13	4	4	arrhythmic	12	1	0.396032	23	23
OG0005193	Lthed_scf0060.1_g076130.1	Qgl_scf0090.1_g042900.1	AT5G58575.2	AT5G58575.2	0.00315671	13	10	6	annual	12	7	4.99091e-05	13	8	10	annual	12	5	0.0107297	12	2	8	arrhythmic	11	6	2.87546e-06	15	4	4	annual	14	8	0.00225982	12	10	5	annual	11	7	6.07103e-06	13	11	5	annual	12	8	0.00240696	13	2
OG0005194	Lthed_scf0060.1_g074750.1	Qgl_scf0090.1_g043940.1	AT3G47340.1	AT3G47340.1	0.0532702	13	9	7	arrhythmic	12	6	0.269538	23	12	13	arrhythmic	21	9	0.901013	11	4	7	arrhythmic	10	8	0.00324976	19	13	3	arrhythmic	17	4	0.00337091	12	6	9	annual	11	3	0.034331	14	3	12	arrhythmic	13	12	0.0588701	21	3
OG0005195	Lthed_scf0060.1_g074570.1	Qgl_scf0090.1_g044320.1	AT5G58610.4	AT5G58610.4	0.213686	18	8	11	arrhythmic	17	5	0.295432	11	2	4	arrhythmic	10	11	0.562901	7	7	4	arrhythmic	6	11	0.194737	14	14	10	arrhythmic	13	5	0.0444909	11	1	4	arrhythmic	10	10	0.000825543	13	13	4	annual	12	10	0.492125	15	2
OG0005196	Lthed_scf0060.1_g074460.1	Qgl_scf0090.1_g044360.1	AT5G58660.1	AT5G58660.1	0.333127	13	12	6	arrhythmic	12	9	0.180947	7	2	3	arrhythmic	6	11	0.703228	14	13	5	arrhythmic	13	4	7.42175e-08	13	2	9	annual	12	6	0.616115	13	1	4	arrhythmic	12	10	0.347583	6	3	2	arrhythmic	6	12	0.544179	6	5
OG0005198	Lthed_scf0060.1_g073230.1	Qgl_scf0090.1_g045240.1	AT5G58730.1	AT5G58730.1	0.0166087	14	2	8	arrhythmic	13	11	0.00516718	15	1	9	annual	14	10	0.0215597	15	9	7	arrhythmic	14	1	4.44575e-05	13	9	9	annual	12	12	0.00277317	14	2	7	annual	13	11	0.0986921	12	1	8	arrhythmic	11	10	0.707213	9	6
OG0005199	Lthed_scf0060.1_g072850.1	Qgl_scf0090.1_g045730.1	AT2G29890.5	AT2G29890.5	5.48653e-07	14	9	8	annual	13	6	5.82004e-08	13	12	3	annual	12	9	1.30419e-06	14	13	10	annual	13	4	1.92665e-05	12	3	6	annual	11	7	4.32441e-07	12	10	7	annual	11	7	7.00685e-09	13	11	4	annual	12	8	1.13509e-06	14	3
OG0005200	Lthed_scf0060.1_g071690.1	Qgl_scf0090.1_g047080.1	AT1G07270.2	AT2G29680.2	1	11	8	6	arrhythmic	10	5	1	13	12	4	arrhythmic	12	9	1	14	13	9	arrhythmic	13	4	1	12	6	2	arrhythmic	11	10	0.95366	12	7	10	arrhythmic	11	4	0.00955359	14	11	6	annual	13	8	0.00107086	7	5
OG0005201	Lthed_scf0060.1_g052800.1	Qgl_scf0090.1_g067330.1	AT3G46970.1	AT3G46970.1	0.0883188	13	7	1	arrhythmic	12	4	0.00528564	14	5	12	annual	13	2	1.97484e-07	14	11	6	annual	13	2	0.000145873	13	8	9	annual	12	12	0.00276923	12	6	1	annual	11	3	5.49439e-10	13	5	5	annual	12	2	0.00247153	15	10
OG0005202	Lthed_scf0060.1_g053910.1	Qgl_scf0090.1_g066560.1	AT1G07380.2	AT1G07380.2	0.00344447	7	2	3	half-annual	6	11	0.117186	10	2	6	arrhythmic	9	11	0.118437	13	1	2	arrhythmic	12	5	0.0159063	13	9	9	arrhythmic	12	12	0.0107094	6	3	3	arrhythmic	6	12	0.107501	14	2	6	arrhythmic	13	11	0.153096	7	1
OG0005203	Lthed_scf0060.1_g054110.1	Qgl_scf0090.1_g066470.1	AT2G29540.2	AT2G29540.2	0.919405	6	2	3	arrhythmic	6	11	0.0389729	23	12	20	arrhythmic	21	9	0.0765481	7	2	3	arrhythmic	6	6	0.155329	16	2	8	arrhythmic	15	6	0.0259946	7	6	4	arrhythmic	6	3	0.00447221	23	22	2	arrhythmic	21	6	0.0116111	7	5
OG0005204	Lthed_scf0060.1_g055890.1	Qgl_scf0090.1_g064450.1	AT3G11400.1	AT3G11400.1	0.0079077	13	4	5	annual	12	1	0.000141535	13	4	4	annual	12	1	0.390816	12	9	7	arrhythmic	11	1	0.00115862	13	10	5	annual	12	1	4.61234e-06	12	5	4	annual	11	2	0.000357033	13	4	10	annual	12	1	5.21644e-07	13	11
OG0005205	Lthed_scf0060.1_g055950.1	Qgl_scf0090.1_g064330.1	AT2G29380.1	AT2G29380.1	0.696612	13	12	5	arrhythmic	12	9	0.96937	7	1	2	arrhythmic	6	10	0.285626	13	11	8	arrhythmic	12	2	0.00776278	14	8	9	annual	13	12	0.0339235	11	6	1	arrhythmic	10	3	0.00495028	13	1	7	annual	12	10	0.00490007	12	3
OG0005206	Lthed_scf0060.1_g058920.1	Qgl_scf0090.1_g060590.1	AT2G29130.1	AT2G29130.1	0.169593	13	9	10	arrhythmic	12	6	1.14948e-05	12	12	7	annual	11	9	1	14	13	9	arrhythmic	13	4	0.121545	12	3	9	arrhythmic	11	7	0.00818762	11	2	3	annual	10	11	9.59841e-06	14	11	6	annual	13	8	0.0015924	15	4
OG0005207	Lthed_scf0060.1_g059140.1	Qgl_scf0090.1_g060510.1	AT1G07510.1	AT1G07510.1	5.20487e-05	14	4	5	annual	13	1	2.52037e-07	13	4	7	annual	12	1	1.35951e-06	13	9	8	annual	12	1	3.59006e-06	13	10	6	annual	12	1	4.28368e-07	12	3	5	annual	11	12	8.88874e-08	12	4	7	annual	11	1	0.000391504	12	10
OG0005208	Lthed_scf0060.1_g059360.1	Qgl_scf0090.1_g060260.1	AT1G07530.1	AT1G07530.1	6.6385e-06	14	2	6	annual	13	11	0.0550535	13	3	9	arrhythmic	12	12	0.00329181	18	5	8	arrhythmic	17	9	0.00856542	15	2	13	annual	14	6	2.26854e-05	11	4	5	annual	10	1	0.000124479	13	2	10	annual	12	11	3.96059e-05	14	11
OG0005209	Lthed_scf0060.1_g060960.1	Qgl_scf0090.1_g058770.1	AT1G07570.5	AT2G28930.3	0.000421594	12	3	10	annual	11	12	0.0272527	12	6	6	arrhythmic	11	3	0.000574511	14	9	6	annual	13	1	0.00011249	12	10	6	annual	11	1	0.00501296	12	3	8	annual	11	12	0.000840136	12	3	5	annual	11	12	0.235081	13	8
OG0005210	Lthed_scf0060.1_g061220.1	Qgl_scf0090.1_g058550.1	AT5G24318.1	AT5G24318.1	0.000110117	13	3	10	annual	12	12	0.000388351	13	3	7	annual	12	12	1.32019e-05	14	9	10	annual	13	1	6.17745e-06	12	11	7	annual	11	2	0.0110434	13	3	6	arrhythmic	12	12	0.554348	13	8	4	arrhythmic	12	5	0.0967174	13	9
OG0005211	Lthed_scf0060.1_g062280.1	Qgl_scf0090.1_g057370.1	AT3G55370.1	AT3G55370.1	0.173477	11	10	3	arrhythmic	10	7	0.31197	12	6	8	arrhythmic	11	3	0.33809	7	5	1	arrhythmic	6	9	0.814512	9	3	2	arrhythmic	8	7	0.299681	12	10	4	arrhythmic	11	7	0.000103695	14	9	7	annual	13	6	3.12883e-06	14	11
OG0005214	Lthed_scf0060.1_g064230.1	Qgl_scf0090.1_g055470.1	AT3G46130.1	AT5G59780.3	0.0801923	7	5	3	arrhythmic	6	2	0.29488	11	10	3	arrhythmic	10	7	0.184622	7	4	2	arrhythmic	6	8	0.786126	8	2	4	arrhythmic	7	6	0.0420315	13	9	8	arrhythmic	12	6	0.0687486	12	7	1	arrhythmic	11	4	0.00436063	15	15
OG0005215	Lthed_scf0060.1_g067220.1	Qgl_scf0090.1_g051630.1	AT3G45770.1	AT3G45770.1	1.90788e-07	13	9	8	annual	12	6	6.74709e-06	13	11	6	annual	12	8	0.000259084	14	1	9	annual	13	5	3.27393e-06	12	5	5	annual	11	9	0.000196159	13	12	3	annual	12	9	5.05175e-07	13	11	4	annual	12	8	2.19048e-06	16	14
OG0005216	Lthed_scf0060.1_g068320.1	Qgl_scf0090.1_g050860.1	AT3G45630.2	AT3G45630.2	0.00469707	18	16	15	arrhythmic	17	12	4.19265e-09	13	4	7	annual	12	1	0.0279358	14	12	1	arrhythmic	13	3	0.00988081	23	22	11	arrhythmic	21	12	0.100788	12	4	6	arrhythmic	11	1	2.34694e-07	13	3	7	annual	12	12	0.00105705	14	11
OG0005217	Lthed_scf0060.1_g068600.1	Qgl_scf0090.1_g050740.1	AT3G45640.1	AT3G45640.1	6.67458e-07	13	3	8	annual	12	12	0.00012135	13	3	8	annual	12	12	0.0276352	21	2	13	arrhythmic	19	6	1.27176e-06	12	11	5	annual	11	2	0.0759637	10	5	5	arrhythmic	9	2	0.139538	13	3	9	arrhythmic	12	12	0.181611	9	5
OG0005218	Lthed_scf0060.1_g069830.1	Qgl_scf0090.1_g049410.1	AT5G60210.6	AT5G60210.6	0.241762	23	8	17	arrhythmic	21	5	1.30164e-07	13	11	6	annual	12	8	0.104065	7	7	3	arrhythmic	6	11	6.39348e-07	13	5	4	annual	12	9	0.0063802	13	12	4	annual	12	9	1.16703e-06	13	10	6	annual	12	7	0.353772	16	4
OG0005219	Lthed_scf0060.1_g070090.1	Qgl_scf0090.1_g049100.1			1.50846e-07	13	4	6	annual	12	1	7.74839e-07	13	5	6	annual	12	2	2.32834e-05	12	9	8	annual	11	1	1.93483e-05	13	10	6	annual	12	1	6.79216e-05	12	3	10	annual	11	12	6.52782e-07	13	4	6	annual	12	1	0.261494	13	8
OG0005220	Lthed_scf0060.1_g070610.1	Qgl_scf0090.1_g048680.1	AT3G09690.2	AT3G09690.2	0.00893115	13	9	7	annual	12	6	0.000510093	13	13	3	annual	12	10	0.00242051	14	13	11	annual	13	4	1.58651e-05	13	1	8	annual	12	5	0.000120647	13	9	7	annual	12	6	2.52158e-07	13	1	2	annual	12	10	0.0167221	14	13
OG0005221	Lthed_scf0060.1_g045090.1	Qgl_scf0090.1_g074870.1	AT5G60450.2	AT5G60450.2	0.790472	4	2	2	arrhythmic	4	11	0.335042	12	1	7	arrhythmic	11	10	6.10905e-05	13	5	6	annual	12	9	4.1754e-06	12	6	4	annual	11	10	0.00633897	12	6	10	annual	11	3	0.0127345	13	6	11	arrhythmic	12	3	0.389595	15	14
OG0005222	Lthed_scf0060.1_g044940.1	Qgl_scf0090.1_g075090.1	AT1G61560.1	AT1G61560.1	0.371437	17	4	4	arrhythmic	16	1	0.00155722	15	10	8	annual	14	7	0.494977	23	18	19	arrhythmic	21	9	0.00720695	12	9	9	annual	11	12	6.83302e-07	12	4	4	annual	11	1	0.0611596	10	6	2	arrhythmic	9	3	0.0718785	15	9
OG0005224	Lthed_scf0060.1_g042580.1	Qgl_scf0090.1_g076360.1	AT5G60640.1	AT5G60640.1	0.000333541	13	12	4	annual	12	9	0.0042322	12	12	4	annual	11	9	0.000362229	14	13	12	annual	13	4	4.67978e-08	12	3	6	annual	11	7	0.0231108	12	7	10	arrhythmic	11	4	0.000544228	12	8	9	annual	11	5	0.0213225	13	13
OG0005225	Lthed_scf0060.1_g042190.1	Qgl_scf0090.1_g076640.1	AT2G28390.1	AT2G28390.1	0.000172585	15	9	11	annual	14	6	0.195858	12	12	8	arrhythmic	11	9	0.0249575	12	4	6	arrhythmic	11	8	0.643209	7	1	4	arrhythmic	6	5	0.00566242	13	10	11	annual	12	7	0.662104	7	4	5	arrhythmic	6	1	0.282324	13	11
OG0005226	Lthed_scf0060.1_g041840.1	Qgl_scf0090.1_g076790.1	AT1G08010.3	AT1G08000.2	0.00319162	13	13	3	annual	12	10	1.54055e-09	12	12	4	annual	11	9	0.000175146	12	3	9	annual	11	7	3.0374e-05	12	4	7	annual	11	8	0.646636	19	1	1	arrhythmic	17	10	0.0264482	12	8	9	arrhythmic	11	5	0.0267204	13	7
OG0005227	Lthed_scf0060.1_g040750.1	Qgl_scf0090.1_g078320.1	AT2G27990.1	AT2G27990.1	0.060986	19	11	3	arrhythmic	17	8	0.0340089	13	11	7	arrhythmic	12	8	0.45988	11	5	4	arrhythmic	10	9	0.10679	13	2	8	arrhythmic	12	6	0.0741135	12	8	8	arrhythmic	11	5	0.00699051	6	1	3	half-annual	6	10	1.62867e-06	13	2
OG0005228	Lthed_scf0060.1_g040720.1	Qgl_scf0090.1_g078340.1	AT2G37025.3	AT1G17460.1	1.0693e-08	13	9	9	annual	12	6	0.350774	8	3	6	arrhythmic	7	12	1.26543e-06	13	1	10	annual	12	5	1.08004e-06	12	4	6	annual	11	8	0.124753	6	1	3	arrhythmic	6	10	1.87223e-06	13	10	7	annual	12	7	0.000596039	14	5
OG0005229	Lthed_scf0060.1_g040590.1	Qgl_scf0090.1_g078640.1	AT5G60760.1	AT5G60760.1	0.331354	8	8	5	arrhythmic	7	5	0.0856211	13	12	6	arrhythmic	12	9	0.000683414	12	4	7	annual	11	8	0.15756	7	1	5	arrhythmic	6	5	0.0048378	12	3	4	annual	11	12	0.00361159	14	2	1	annual	13	11	2.77009e-05	13	7
OG0005232	Lthed_scf0060.1_g038430.1	Qgl_scf0090.1_g079550.1	AT2G27080.2	AT2G27080.2	0.076547	12	12	4	arrhythmic	11	9	0.00678105	12	8	8	annual	11	5	9.57854e-06	13	1	7	annual	12	5	0.000233643	12	2	8	annual	11	6	0.00452381	6	6	3	half-annual	6	3	0.00109201	13	11	5	annual	12	8	0.000836176	12	4
OG0005233	Lthed_scf0060.1_g038390.1	Qgl_scf0090.1_g079570.1	AT3G20770.1	AT3G20770.1	0.414111	7	3	5	arrhythmic	6	12	0.0249071	13	3	10	arrhythmic	12	12	0.0630694	7	5	1	arrhythmic	6	9	0.117401	11	2	5	arrhythmic	10	6	0.0145029	13	4	2	arrhythmic	12	1	0.00215845	12	4	4	annual	11	1	0.0672056	7	3
OG0005234	Lthed_scf0060.1_g038260.1	Qgl_scf0090.1_g079650.1	AT2G27040.2	AT2G27040.2	1.08741e-08	13	10	7	annual	12	7	4.04167e-11	13	11	6	annual	12	8	1.12264e-05	13	5	5	annual	12	9	1.0155e-08	13	4	7	annual	12	8	0.0028719	12	1	3	annual	11	10	2.10992e-08	14	11	6	annual	13	8	5.47547e-07	14	2
OG0005235	Lthed_scf0060.1_g019220.1	Qgl_scf0090.1_g103070.1	AT5G21090.1	AT5G21090.1	0.0146544	14	2	6	arrhythmic	13	11	0.0991745	14	2	11	arrhythmic	13	11	0.900434	5	4	3	arrhythmic	5	8	0.11388	13	4	10	arrhythmic	12	8	0.00120509	12	4	3	annual	11	1	0.000221316	13	3	5	annual	12	12	0.000466827	7	2
OG0005236	Lthed_scf0060.1_g026800.1	Qgl_scf0090.1_g090010.1	AT2G28190.1	AT2G28190.1	0.0044653	14	12	10	annual	13	9	4.1959e-05	12	1	7	annual	11	10	1.29867e-06	14	1	8	annual	13	5	0.0127443	13	5	6	arrhythmic	12	9	0.040627	6	6	4	arrhythmic	6	3	0.244731	13	5	9	arrhythmic	12	2	0.00167198	13	4
OG0005238	Lthed_scf0060.1_g035980.1	Qgl_scf0090.1_g080980.1	AT1G08470.1	AT1G08470.1	0.995928	7	1	6	arrhythmic	6	10	0.152703	7	5	3	arrhythmic	6	2	0.067895	13	1	1	arrhythmic	12	5	0.276916	12	10	7	arrhythmic	11	1	0.226593	12	7	11	arrhythmic	11	4	0.0271767	13	7	9	arrhythmic	12	4	0.62968	9	1
OG0005239	Lthed_scf0060.1_g035220.1	Qgl_scf0090.1_g081600.1	AT3G43610.1	AT3G43610.1	0.22628	6	2	4	arrhythmic	6	11	0.00515973	14	12	11	annual	13	9	0.0170771	14	9	8	arrhythmic	13	1	0.118681	23	14	12	arrhythmic	21	5	0.314611	6	1	4	arrhythmic	6	10	0.0030404	14	11	5	annual	13	8	0.0501794	7	5
OG0005240	Lthed_scf0100.1_g104990.1	Qgl_scf0100.1_g000280.1	AT1G14130.1	AT1G14130.1	0.302943	22	7	20	arrhythmic	20	4	1.1538e-06	14	10	9	annual	13	7	0.000374761	17	13	12	annual	16	4	9.1804e-05	13	4	7	annual	12	8	0.000415679	13	3	8	annual	12	12	9.27258e-09	13	11	5	annual	12	8	0.0589236	11	8
OG0005241	Lthed_scf0110.1_g015190.1	Qgl_scf0110.1_g070730.1	AT3G10220.1	AT3G10220.1	0.00696994	14	8	10	annual	13	5	8.56085e-05	12	12	9	annual	11	9	0.10611	7	7	5	arrhythmic	6	11	0.0222607	11	5	5	arrhythmic	10	9	0.0060331	6	1	4	half-annual	6	10	3.51067e-06	13	10	7	annual	12	7	0.319403	7	5
OG0005242	Lthed_scf0060.1_g004970.1	Qgl_scf0090.1_g097140.1	AT3G44220.1	AT3G44220.1	0.814774	13	9	7	arrhythmic	12	6	0.353226	13	11	7	arrhythmic	12	8	1	13	1	6	arrhythmic	12	5	0.195017	17	15	7	arrhythmic	16	6	0.00508574	12	12	4	annual	11	9	0.000272201	12	1	4	annual	11	10	0.0327646	13	8
OG0005244	Lthed_scf0060.1_g006640.1	Qgl_scf0090.1_g095850.1	AT3G52660.3	AT3G52660.3	0.00240988	23	9	4	arrhythmic	21	6	0.00109304	13	3	7	annual	12	12	0.496643	14	9	8	arrhythmic	13	1	0.759955	23	12	14	arrhythmic	21	3	0.00820846	23	8	10	arrhythmic	21	5	0.264113	9	9	6	arrhythmic	8	6	0.0624509	12	11
OG0005245	Lthed_scf0060.1_g022160.1	Qgl_scf0090.1_g095280.1	AT1G08360.1	AT1G08360.1	0.000875633	14	1	6	annual	13	10	6.05242e-05	14	14	9	annual	13	10	0.883045	7	7	5	arrhythmic	6	11	0.0145532	13	7	8	arrhythmic	12	11	0.000239153	12	7	2	annual	11	4	0.0404018	23	20	2	arrhythmic	21	4	2.42298e-05	13	10
OG0005246	Lthed_scf0060.1_g022330.1	Qgl_scf0090.1_g095120.1	AT1G08320.4	AT1G08320.4	0.00545377	10	10	8	annual	9	7	0.998616	13	10	5	arrhythmic	12	7	0.524378	13	12	6	arrhythmic	12	3	0.0658228	12	3	8	arrhythmic	11	7	0.22961	9	6	2	arrhythmic	8	3	1.94322e-05	13	3	6	annual	12	12	0.00782591	12	12
OG0005247	Lthed_scf0060.1_g024800.1	Qgl_scf0090.1_g092040.1	AT2G27810.1	AT2G27810.1	0.00506434	14	8	9	annual	13	5	0.5743	7	6	3	arrhythmic	6	3	8.20441e-05	14	1	8	annual	13	5	8.8641e-05	13	3	7	annual	12	7	0.00538722	12	12	3	annual	11	9	8.88041e-07	13	11	5	annual	12	8	2.8947e-07	14	4
OG0005248	Lthed_scf0060.1_g025070.1	Qgl_scf0090.1_g091740.1	AT5G42820.2	AT5G42820.2	6.42188e-08	13	12	3	annual	12	9	0.00169146	13	9	6	annual	12	6	0.00204476	14	3	5	annual	13	7	0.0277381	22	4	3	arrhythmic	20	8	0.000252817	12	12	2	annual	11	9	0.0142487	6	6	2	arrhythmic	6	3	0.0626194	14	1
OG0005249	Lthed_scf0060.1_g025690.1	Qgl_scf0090.1_g091390.1	AT5G22850.1	AT5G22850.1	0.021723	15	2	9	arrhythmic	14	11	1.59768e-05	13	4	4	annual	12	1	0.152428	7	1	4	arrhythmic	6	5	0.000224029	13	9	9	annual	12	12	0.00456376	13	2	10	annual	12	11	0.00442882	13	2	4	annual	12	11	0.227301	7	2
OG0005250	Lthed_scf0060.1_g026530.1	Qgl_scf0090.1_g090260.1	AT3G44880.1	AT3G44880.1	0.0232958	13	11	6	arrhythmic	12	8	5.93271e-07	15	10	7	annual	14	7	0.963593	8	1	4	arrhythmic	7	5	0.75612	7	5	2	arrhythmic	6	9	0.731272	12	11	5	arrhythmic	11	8	0.0114326	13	1	2	arrhythmic	12	10	2.99277e-05	14	3
OG0005251	Lthed_scf0060.1_g040460.1	Qgl_scf0090.1_g078790.1	AT2G26920.1	AT2G26920.1	0.00066124	12	12	4	annual	11	9	0.0105633	14	11	8	arrhythmic	13	8	0.000525631	13	5	6	annual	12	9	0.000191998	13	6	2	annual	12	10	0.0707059	23	11	21	arrhythmic	21	8	0.672011	11	4	6	arrhythmic	10	1	0.494945	3	3
OG0005252	Lthed_scf0060.1_g029600.1	Qgl_scf0090.1_g087210.1	AT2G44820.2	AT2G44820.2	0.00380973	13	10	6	annual	12	7	0.706677	5	2	2	arrhythmic	5	11	0.00363578	10	1	5	annual	9	5	0.0500785	23	13	10	arrhythmic	21	4	0.549164	7	1	2	arrhythmic	6	10	0.112521	10	8	6	arrhythmic	9	5	9.85685e-05	14	12
OG0005254	Lthed_scf0030.1_g077300.1	Qgl_scf0010.1_g109340.1	AT2G31220.1	AT2G31220.1	1	9	8	5	arrhythmic	8	5	0.0737217	8	8	3	arrhythmic	7	5	1	13	13	8	arrhythmic	12	4	1	15	11	10	arrhythmic	14	2	0.999912	7	5	2	arrhythmic	6	2	0.00252555	14	2	6	annual	13	11	0.414075	7	1
OG0005255	Lthed_scf0060.1_g030620.1	Qgl_scf0090.1_g086500.1	AT5G19400.5	AT5G19400.5	0.0042221	23	16	15	arrhythmic	21	12	0.000128473	13	3	7	annual	12	12	0.00242524	12	12	5	annual	11	3	0.00160243	13	8	10	annual	12	12	0.167527	6	3	4	arrhythmic	6	12	3.28324e-05	13	3	7	annual	12	12	0.00119633	12	10
OG0005256	Lthed_scf0060.1_g031090.1	Qgl_scf0090.1_g086260.1	AT5G12340.2	AT5G12340.2	1	19	8	9	arrhythmic	17	5	0.231296	12	8	8	arrhythmic	11	5	0.275671	23	4	15	arrhythmic	21	8	0.169603	23	12	4	arrhythmic	21	3	0.0684404	13	6	12	arrhythmic	12	3	1.27823e-07	13	11	5	annual	12	8	0.999993	12	3
OG0005259	Lthed_scf0060.1_g033160.1	Qgl_scf0090.1_g084940.1	AT5G12410.1	AT5G12410.1	9.376e-09	13	5	4	annual	12	2	6.92399e-07	13	3	8	annual	12	12	0.204761	14	11	1	arrhythmic	13	2	1.51981e-05	12	7	8	annual	11	11	1.67514e-09	12	4	7	annual	11	1	1.02998e-06	13	5	7	annual	12	2	1.84779e-08	13	10
OG0005263	Lthed_scf0060.1_g014060.1	Qgl_scf0090.1_g108010.1	AT5G12840.5	AT5G12840.5	0.000123092	13	11	5	annual	12	8	1.68538e-07	13	13	4	annual	12	10	6.10669e-05	14	3	5	annual	13	7	8.951e-07	13	2	8	annual	12	6	0.0348784	6	5	2	arrhythmic	6	2	0.086528	13	1	7	arrhythmic	12	10	0.100088	15	15
OG0005264	Lthed_scf0120.1_g009560.1	Qgl_scf0120.1_g008310.1	AT4G17870.1	AT4G17870.1	0.00463716	12	9	10	annual	11	6	0.543011	15	13	9	arrhythmic	14	10	0.120907	15	4	9	arrhythmic	14	8	0.0922998	23	4	18	arrhythmic	21	8	4.58942e-06	13	9	7	annual	12	6	5.28111e-07	13	12	6	annual	12	9	0.18096	23	9
OG0005265	Lthed_scf0060.1_g018400.1	Qgl_scf0090.1_g103980.1	AT3G57930.2	AT3G57930.2	5.13047e-05	13	3	9	annual	12	12	1.82575e-05	13	2	9	annual	12	11	0.00206209	14	8	9	annual	13	12	0.00106144	11	10	4	annual	10	1	1.11061e-08	12	4	7	annual	11	1	6.90165e-09	13	3	9	annual	12	12	1.41534e-07	15	9
OG0005267	Lthed_scf0030.1_g054830.1	Qgl_scf0010.1_g134410.1	AT2G32250.6	AT2G32250.6	0.699069	6	1	3	arrhythmic	6	10	0.0057282	12	2	2	annual	11	11	0.000419885	13	10	4	annual	12	1	0.0668885	6	1	3	arrhythmic	6	5	0.133684	13	9	8	arrhythmic	12	6	0.00502557	11	2	4	annual	10	11	0.000229926	13	10
OG0005268	Lthed_scf0060.1_g002130.1	Qgl_scf0090.1_g099330.1	AT2G36850.1	AT3G07160.3	0.341427	23	8	13	arrhythmic	21	5	0.0220361	13	4	6	arrhythmic	12	1	0.659663	23	23	5	arrhythmic	21	1	0.174963	7	1	3	arrhythmic	6	5	2.71642e-06	13	3	7	annual	12	12	0.00495284	14	13	11	annual	13	10	0.00024093	13	10
OG0005270	Lthed_scf0090.1_g075040.1	Qgl_scf0060.1_g037710.1	AT2G31190.1	AT2G31190.1	0.0036988	13	4	6	annual	12	1	0.000858592	14	3	8	annual	13	12	0.0443487	15	11	1	arrhythmic	14	2	0.319958	11	7	7	arrhythmic	10	11	1.04605e-05	12	4	8	annual	11	1	0.011136	14	13	5	arrhythmic	13	10	1.61788e-05	13	9
OG0005271	Lthed_scf0060.1_g020950.1	Qgl_scf0090.1_g101360.1	AT5G19830.1	AT5G19830.1	0.092291	23	4	13	arrhythmic	21	1	0.442457	12	7	5	arrhythmic	11	4	0.0444929	12	11	6	arrhythmic	11	2	3.94965e-05	12	2	8	annual	11	6	0.0190842	20	6	10	arrhythmic	18	3	0.325111	15	3	8	arrhythmic	14	12	3.1389e-06	13	10
OG0005273	Lthed_scf0060.1_g003390.1	Qgl_scf0090.1_g098190.1	AT1G55510.1	AT3G13450.1	0.148953	8	5	3	arrhythmic	7	2	0.0441587	14	3	9	arrhythmic	13	12	0.0151482	13	4	4	arrhythmic	12	8	0.223192	15	13	6	arrhythmic	14	4	0.0848309	12	7	8	arrhythmic	11	4	0.000155198	14	9	7	annual	13	6	1.03932e-05	13	5
OG0005274	Lthed_scf0060.1_g003240.1	Qgl_scf0090.1_g098480.1	AT1G55520.4	AT1G55520.4	0.545088	14	2	10	arrhythmic	13	11	2.49828e-06	13	3	8	annual	12	12	0.0345923	12	5	5	arrhythmic	11	9	0.00116804	15	3	8	annual	14	7	0.359956	10	4	7	arrhythmic	9	1	7.58951e-05	12	4	7	annual	11	1	0.52708	7	3
OG0005275	Lthed_scf0010.1_g000140.1	Qgl_scf0020.1_g004530.1	AT5G49740.1	AT5G49740.1	0.000986101	12	3	9	annual	11	12	0.000426314	13	4	5	annual	12	1	0.123962	15	9	9	arrhythmic	14	1	0.000615493	14	8	10	annual	13	12	0.000568243	12	3	9	annual	11	12	0.000383419	13	4	5	annual	12	1	0.524853	7	5
OG0005276	Lthed_scf0080.1_g037050.1	Qgl_scf0070.1_g072880.1	AT3G19440.1	AT3G19440.1	0.24824	6	2	2	arrhythmic	6	11	0.00931728	13	13	12	annual	12	10	0.770327	4	1	2	arrhythmic	4	5	0.0668542	6	1	3	arrhythmic	6	5	0.01843	6	1	2	arrhythmic	6	10	0.00143789	12	8	4	annual	11	5	0.0268055	14	12
OG0005277	Lthed_scf0080.1_g037630.1	Qgl_scf0070.1_g072500.1	AT2G15230.1	AT2G15230.1	0.00142109	12	12	4	annual	11	9	0.169314	6	4	3	arrhythmic	6	1	1.284e-05	12	5	4	annual	11	9	2.0623e-07	14	3	6	annual	13	7	0.402696	11	4	4	arrhythmic	10	1	3.37148e-09	13	3	8	annual	12	12	0.0308676	14	3
OG0005278	Lthed_scf0080.1_g044760.1	Qgl_scf0070.1_g065590.1	AT4G33890.2	AT4G33890.2	0.0064259	15	9	10	annual	14	6	0.619994	7	3	5	arrhythmic	6	12	0.591987	23	21	9	arrhythmic	21	12	0.240355	17	11	14	arrhythmic	16	2	0.345427	8	7	3	arrhythmic	7	4	0.58526	12	5	2	arrhythmic	11	2	0.362114	23	23
OG0005279	Lthed_scf0080.1_g046780.1	Qgl_scf0070.1_g065250.1	AT3G19610.1	AT3G19610.1	6.79098e-05	14	2	7	annual	13	11	0.122447	21	21	2	arrhythmic	19	5	0.383415	12	12	6	arrhythmic	11	3	0.000764336	14	8	9	annual	13	12	6.29707e-05	12	4	6	annual	11	1	0.000159851	13	4	7	annual	12	1	0.755759	12	2
OG0005281	Lthed_scf0080.1_g047810.1	Qgl_scf0070.1_g064320.1	AT3G19650.1	AT3G19650.1	0.147365	15	7	9	arrhythmic	14	4	0.992765	6	3	4	arrhythmic	6	12	0.960795	17	1	6	arrhythmic	16	5	0.0190906	13	5	2	arrhythmic	12	9	0.706677	22	3	12	arrhythmic	20	12	0.290725	7	2	3	arrhythmic	6	11	0.031099	20	3
OG0005282	Lthed_scf0080.1_g048070.1	Qgl_scf0070.1_g063840.1	AT2G14750.1	AT2G14750.1	0.182889	13	9	7	arrhythmic	12	6	0.07967	6	2	1	arrhythmic	6	11	0.00403474	13	9	9	annual	12	1	0.0142904	13	10	6	arrhythmic	12	1	0.176546	12	2	1	arrhythmic	11	11	0.00585587	15	10	8	annual	14	7	3.50492e-07	13	10
OG0005284	Lthed_scf0080.1_g048540.1	Qgl_scf0070.1_g063600.1	AT2G14680.3	AT2G14680.3	0.197232	21	6	2	arrhythmic	19	3	1.09139e-05	13	4	9	annual	12	1	0.56593	23	23	4	arrhythmic	21	1	0.217249	10	2	6	arrhythmic	9	6	0.0542287	12	5	1	arrhythmic	11	2	0.000199769	13	5	3	annual	12	2	0.000555324	13	11
OG0005285	Lthed_scf0080.1_g049500.1	Qgl_scf0070.1_g062840.1	AT1G33540.1	AT1G33540.1	1	14	8	10	arrhythmic	13	5	1	12	12	5	arrhythmic	11	9	0.00119234	14	13	10	annual	13	4	1.55873e-09	13	3	6	annual	12	7	9.15103e-09	12	7	10	annual	11	4	1.32324e-07	13	12	4	annual	12	9	3.2164e-08	15	1
OG0005287	Lthed_scf0080.1_g055690.1	Qgl_scf0070.1_g060460.1	AT3G19680.1	AT3G19680.1	0.759263	13	9	9	arrhythmic	12	6	0.905941	4	4	2	arrhythmic	4	1	1.73536e-06	13	1	7	annual	12	5	0.00037594	12	9	10	annual	11	12	0.0135216	14	9	8	arrhythmic	13	6	0.279976	15	9	9	arrhythmic	14	6	0.998408	7	4
OG0005288	Lthed_scf0080.1_g058560.1	Qgl_scf0070.1_g057440.1	AT1G50090.1	AT1G50090.1	1	13	9	4	arrhythmic	12	6	0.671034	13	4	3	arrhythmic	12	1	0.0623567	19	5	1	arrhythmic	17	9	0.999998	14	12	8	arrhythmic	13	3	0.422585	6	2	3	arrhythmic	6	11	0.57562	6	3	3	arrhythmic	6	12	0.0843495	23	19
OG0005289	Lthed_scf0080.1_g060440.1	Qgl_scf0070.1_g054910.1	AT5G64510.1	AT5G64510.1	0.255147	13	12	4	arrhythmic	12	9	0.0813297	8	7	3	arrhythmic	7	4	0.490509	23	13	12	arrhythmic	21	4	0.325662	23	2	10	arrhythmic	21	6	0.476787	22	18	7	arrhythmic	20	2	0.101128	16	1	2	arrhythmic	15	10	0.019611	17	1
OG0005290	Lthed_scf0080.1_g063640.1	Qgl_scf0070.1_g054160.1	AT5G64470.2	AT5G64470.2	0.40436	17	2	3	arrhythmic	16	11	0.131696	13	2	7	arrhythmic	12	11	0.186005	14	9	10	arrhythmic	13	1	0.251912	7	7	2	arrhythmic	6	11	0.04754	14	2	5	arrhythmic	13	11	0.0540493	17	2	8	arrhythmic	16	11	0.00103753	7	7
OG0005291	Lthed_scf0080.1_g063560.1	Qgl_scf0070.1_g054150.1	AT5G64460.8	AT5G64460.8	0.185511	6	3	3	arrhythmic	6	12	4.00472e-06	12	3	9	annual	11	12	2.79984e-07	14	9	8	annual	13	1	0.561746	12	7	9	arrhythmic	11	11	0.00291735	6	1	4	half-annual	6	10	0.822915	13	8	4	arrhythmic	12	5	8.31606e-05	14	12
OG0005293	Lthed_scf0080.1_g072420.1	Qgl_scf0070.1_g041480.1	AT1G22310.1	AT1G22310.1	0.000801703	12	11	7	annual	11	8	1.51211e-07	14	11	5	annual	13	8	3.8797e-06	13	5	3	annual	12	9	2.53652e-06	13	5	5	annual	12	9	0.0261488	7	3	5	arrhythmic	6	12	0.0222967	13	11	8	arrhythmic	12	8	0.679485	14	3
OG0005294	Lthed_scf0080.1_g072900.1	Qgl_scf0070.1_g041210.1	AT5G09420.1	AT5G09420.1	0.0158327	14	14	10	arrhythmic	13	10	1.68979e-07	13	5	6	annual	12	2	0.373353	7	2	3	arrhythmic	6	6	0.109989	12	10	7	arrhythmic	11	1	0.00055923	12	5	4	annual	11	2	1.67768e-07	13	5	6	annual	12	2	3.59049e-06	13	8
OG0005296	Lthed_scf0090.1_g042150.1	Qgl_scf0060.1_g070470.1	AT1G14650.3	AT1G14650.3	0.0225248	23	20	7	arrhythmic	21	4	0.62559	23	16	14	arrhythmic	21	12	0.142841	14	7	4	arrhythmic	13	11	0.0689572	15	1	14	arrhythmic	14	5	0.0237022	22	18	8	arrhythmic	20	2	0.0473577	13	13	5	arrhythmic	12	10	0.159728	13	10
OG0005298	Lthed_scf0010.1_g011130.1	Qgl_scf0020.1_g012050.1	AT1G61000.1	AT1G61000.1	0.0254102	13	3	9	arrhythmic	12	12	0.222452	10	4	6	arrhythmic	9	1	0.00465756	16	4	3	annual	15	8	0.267927	13	2	8	arrhythmic	12	6	0.125317	11	9	2	arrhythmic	10	6	0.000305746	13	10	6	annual	12	7	0.0897156	7	5
OG0005299	Lthed_scf0010.1_g013600.1	Qgl_scf0020.1_g014090.1	AT4G30230.1	AT4G30230.1	3.59761e-06	13	11	7	annual	12	8	0.000105515	13	11	5	annual	12	8	0.00509168	14	13	5	annual	13	4	0.140365	12	3	6	arrhythmic	11	7	0.000499676	12	12	4	annual	11	9	4.90914e-08	13	1	2	annual	12	10	0.00346037	13	7
OG0005301	Lthed_scf0010.1_g181920.1	Qgl_scf0020.1_g176120.1	AT5G43010.1	AT5G43010.1	0.000133103	12	5	7	annual	11	2	5.36159e-09	13	4	7	annual	12	1	0.000521094	13	9	7	annual	12	1	9.20926e-05	14	10	7	annual	13	1	0.319412	13	2	8	arrhythmic	12	11	0.00786292	10	10	4	annual	9	7	0.146989	13	13
OG0005302	Lthed_scf0080.1_g018430.1	Qgl_scf0070.1_g095080.1	AT2G21370.1	AT2G21370.1	0.297588	14	10	7	arrhythmic	13	7	0.00652172	13	10	7	annual	12	7	0.0011447	13	4	7	annual	12	8	0.00161759	12	6	5	annual	11	10	0.113527	7	4	3	arrhythmic	6	1	0.000744806	13	3	6	annual	12	12	0.285984	7	3
OG0005308	Lthed_scf0080.1_g002700.1	Qgl_scf0070.1_g114080.1	AT4G35190.1	AT4G35190.1	0.0949012	12	5	6	arrhythmic	11	2	0.00814259	13	4	9	annual	12	1	0.999999	13	13	4	arrhythmic	12	4	0.00107215	18	14	2	arrhythmic	17	5	5.87625e-10	13	4	6	annual	12	1	0.0127769	12	4	9	arrhythmic	11	1	4.13159e-07	13	11
OG0005312	Lthed_scf0050.1_g041280.1	Qgl_scf0040.1_g048830.1	AT5G13410.1	AT5G13410.1	0.0240993	13	11	5	arrhythmic	12	8	0.0241863	14	11	6	arrhythmic	13	8	4.4967e-06	13	3	8	annual	12	7	3.84081e-05	12	5	5	annual	11	9	0.0173126	6	5	3	arrhythmic	6	2	0.702052	16	7	15	arrhythmic	15	4	0.978118	4	2
OG0005316	Lthed_scf0050.1_g034230.1	Qgl_scf0040.1_g041400.1	AT1G27980.1	AT1G27980.1	0.105329	13	9	2	arrhythmic	12	6	0.0645622	16	5	11	arrhythmic	15	2	0.000776748	13	11	9	annual	12	2	4.17442e-05	13	10	7	annual	12	1	0.00838355	6	2	3	half-annual	6	11	0.0013103	13	1	3	annual	12	10	0.495243	14	10
OG0005319	Lthed_scf0050.1_g030760.1	Qgl_scf0040.1_g038340.1	AT1G67490.1	AT1G67490.1	0.0963684	6	1	3	arrhythmic	6	10	0.991829	8	7	3	arrhythmic	7	4	0.562137	17	12	9	arrhythmic	16	3	0.134035	12	1	10	arrhythmic	11	5	0.240721	6	5	2	arrhythmic	6	2	0.00154112	13	13	8	annual	12	10	0.180782	16	1
OG0005320	Lthed_scf0050.1_g000260.1	Qgl_scf0040.1_g000450.1	AT1G68910.1	AT1G68910.1	0.000189083	13	9	8	annual	12	6	2.4384e-05	14	11	7	annual	13	8	0.0123186	14	13	12	arrhythmic	13	4	2.8302e-05	13	2	9	annual	12	6	0.00652671	13	8	9	annual	12	5	9.66669e-05	13	11	6	annual	12	8	0.00392166	15	3
OG0005325	Lthed_scf0050.1_g009100.1	Qgl_scf0040.1_g011220.1	AT5G64130.1	AT1G69510.3	0.094402	12	3	9	arrhythmic	11	12	0.424065	13	1	5	arrhythmic	12	10	0.738718	23	22	4	arrhythmic	21	1	5.29997e-05	17	12	2	annual	16	3	9.54752e-05	12	3	7	annual	11	12	0.0120397	14	8	11	arrhythmic	13	5	0.00359909	13	10
OG0005328	Lthed_scf0050.1_g017820.1	Qgl_scf0040.1_g025020.1	AT1G60460.1	AT1G60460.1	1	12	8	4	arrhythmic	11	5	1	12	11	8	arrhythmic	11	8	0.595684	5	2	3	arrhythmic	5	6	0.999976	13	13	12	arrhythmic	12	4	0.128592	9	1	4	arrhythmic	8	10	0.00497049	13	10	6	annual	12	7	0.122022	6	1
OG0005333	Lthed_scf0050.1_g063500.1	Qgl_scf0040.1_g069460.1	AT1G75010.1	AT1G75010.1	0.0306778	20	5	11	arrhythmic	18	2	0.0289105	12	2	3	arrhythmic	11	11	0.253958	7	6	5	arrhythmic	6	10	0.0064962	12	8	2	annual	11	12	0.458735	10	4	6	arrhythmic	9	1	0.985773	5	3	4	arrhythmic	5	12	0.0211933	14	7
OG0005336	Lthed_scf0050.1_g058710.1	Qgl_scf0040.1_g063150.1	AT3G19780.2	AT3G19780.2	0.738928	5	4	3	arrhythmic	5	1	0.206486	14	12	7	arrhythmic	13	9	0.00810283	23	6	17	arrhythmic	21	10	0.989184	10	10	3	arrhythmic	9	1	0.000542621	13	4	4	annual	12	1	3.32386e-08	14	3	7	annual	13	12	0.00018619	12	10
OG0005340	Lthed_scf0050.1_g023310.1	Qgl_scf0040.1_g029580.1	AT5G14450.1	AT5G14450.1	0.21191	23	8	17	arrhythmic	21	5	0.135122	7	7	4	arrhythmic	6	4	0.236149	19	13	11	arrhythmic	17	4	0.0156167	6	2	2	arrhythmic	6	6	0.0369031	7	6	4	arrhythmic	6	3	0.0259906	10	10	4	arrhythmic	9	7	0.0224253	6	2
OG0005345	Lthed_scf0020.1_g037210.1	Qgl_scf0030.1_g144950.1	AT1G60550.1	AT1G60550.1	0.000875714	15	9	7	annual	14	6	0.0296803	23	9	7	arrhythmic	21	6	0.0655048	14	3	9	arrhythmic	13	7	0.000287266	12	6	4	annual	11	10	0.000668756	14	8	8	annual	13	5	0.112941	14	9	7	arrhythmic	13	6	0.0544292	14	13
OG0005346	Lthed_scf0050.1_g068620.1	Qgl_scf0040.1_g074090.1	AT1G67960.1	AT1G67960.1	0.0207933	20	2	9	arrhythmic	18	11	4.55253e-08	14	3	8	annual	13	12	0.401305	6	5	4	arrhythmic	6	9	0.00119677	13	9	8	annual	12	12	0.00104719	12	4	3	annual	11	1	4.14049e-10	13	4	6	annual	12	1	0.000476165	14	10
OG0005347	Lthed_scf0050.1_g067560.1	Qgl_scf0040.1_g072930.1	AT1G66140.1	AT1G66140.1	0.358418	9	3	5	arrhythmic	8	12	0.0120688	7	6	3	arrhythmic	6	3	0.176819	15	14	10	arrhythmic	14	5	8.3448e-07	12	4	7	annual	11	8	0.307312	6	5	3	arrhythmic	6	2	0.444226	7	5	4	arrhythmic	6	2	0.125226	12	4
OG0005348	Lthed_scf0050.1_g071850.1	Qgl_scf0040.1_g078850.1	AT1G03400.1	AT1G03400.1	0.465359	9	3	6	arrhythmic	8	12	0.110473	13	9	4	arrhythmic	12	6	2.18228e-05	14	12	1	annual	13	3	1.12821e-06	17	13	1	annual	16	4	0.0269893	16	15	11	arrhythmic	15	11	0.304643	13	9	11	arrhythmic	12	6	6.89375e-05	15	9
OG0005349	Lthed_scf0050.1_g072760.1	Qgl_scf0040.1_g079900.1	AT3G17860.1	AT3G17860.1	0.00397182	14	9	12	annual	13	6	0.000707467	16	12	10	annual	15	9	1.16186e-06	14	4	7	annual	13	8	1.7545e-05	14	3	8	annual	13	7	0.00223008	12	10	7	annual	11	7	0.000976359	13	10	7	annual	12	7	0.000239777	14	5
OG0005350	Lthed_scf0050.1_g073560.1	Qgl_scf0040.1_g081090.1	AT1G23170.2	AT1G23170.2	4.24752e-07	14	9	9	annual	13	6	2.32837e-10	13	12	4	annual	12	9	0.00443609	13	1	9	annual	12	5	0.111349	12	4	8	arrhythmic	11	8	2.32861e-05	13	6	12	annual	12	3	9.13966e-08	13	8	9	annual	12	5	0.00380013	13	13
OG0005351	Lthed_scf0060.1_g009880.1	Qgl_scf0090.1_g115270.1	AT2G01490.2	AT2G01490.2	0.329744	23	23	8	arrhythmic	21	7	0.065708	16	5	6	arrhythmic	15	2	0.0017399	14	9	8	annual	13	1	0.0293164	19	13	1	arrhythmic	17	4	8.36695e-07	13	3	7	annual	12	12	0.0103665	14	3	8	arrhythmic	13	12	6.18104e-07	13	10
OG0005357	Lthed_scf0090.1_g038940.1	Qgl_scf0060.1_g072420.1	AT5G60570.3	AT5G60570.3	0.521306	8	5	3	arrhythmic	7	2	0.00958013	13	4	10	annual	12	1	0.48997	14	12	1	arrhythmic	13	3	0.38643	11	11	3	arrhythmic	10	2	0.682372	6	4	3	arrhythmic	6	1	0.0449493	14	2	12	arrhythmic	13	11	0.177123	12	12
OG0005358	Lthed_scf0090.1_g043780.1	Qgl_scf0060.1_g068840.1	AT5G16870.1	AT5G16870.1	6.62809e-05	13	9	8	annual	12	6	0.00171265	11	1	8	annual	10	10	0.110869	12	2	9	arrhythmic	11	6	5.32411e-06	12	4	6	annual	11	8	3.36126e-06	11	8	9	annual	10	5	3.45701e-09	13	10	6	annual	12	7	0.0492797	14	13
OG0005361	Lthed_scf0120.1_g072710.1	Qgl_scf0120.1_g064090.1	AT1G77990.1	AT1G77990.1	0.471932	7	6	4	arrhythmic	6	3	9.15697e-05	13	8	9	annual	12	5	0.000865355	14	14	4	annual	13	5	6.02497e-06	13	13	10	annual	12	4	0.000125812	12	9	7	annual	11	6	0.00681076	6	1	3	half-annual	6	10	0.00249067	12	3
OG0005364	Lthed_scf0090.1_g047390.1	Qgl_scf0060.1_g065700.1	AT3G03130.1	AT3G03130.1	0.878957	7	2	2	arrhythmic	6	11	0.05778	14	11	8	arrhythmic	13	8	0.0899515	14	13	11	arrhythmic	13	4	0.924223	16	14	11	arrhythmic	15	5	6.21624e-05	11	8	8	annual	10	5	2.3906e-07	13	10	7	annual	12	7	0.00103042	14	12
OG0005365	Lthed_scf0060.1_g011550.1	Qgl_scf0090.1_g113160.1	AT5G13240.1	AT5G13240.1	0.00637586	12	4	9	annual	11	1	0.0379128	7	4	3	arrhythmic	6	1	0.960536	7	3	3	arrhythmic	6	7	0.104168	6	4	4	arrhythmic	6	8	0.000645163	12	4	3	annual	11	1	0.000529502	13	4	4	annual	12	1	0.000710262	7	3
OG0005367	Lthed_scf0060.1_g010540.1	Qgl_scf0090.1_g114720.1	AT1G71000.1	AT1G71000.1	0.0161101	13	12	5	arrhythmic	12	9	1.90004e-05	13	10	7	annual	12	7	0.367569	15	2	6	arrhythmic	14	6	0.00698873	23	3	10	arrhythmic	21	7	0.021036	6	5	4	arrhythmic	6	2	0.0467728	17	6	15	arrhythmic	16	3	0.179004	17	1
OG0005369	Lthed_scf0090.1_g019230.1	Qgl_scf0060.1_g096440.1	AT5G53220.7	AT5G53220.7	0.283176	23	21	11	arrhythmic	21	5	2.0111e-06	13	9	4	annual	12	6	0.181031	12	5	8	arrhythmic	11	9	0.977542	6	4	5	arrhythmic	6	8	0.0351697	10	4	5	arrhythmic	9	1	4.89452e-05	13	2	6	annual	12	11	0.0929705	14	7
OG0005371	Lthed_scf0090.1_g021060.1	Qgl_scf0060.1_g092020.1	AT5G60750.1	AT5G60750.1	0.763998	14	11	12	arrhythmic	13	8	0.0621797	18	15	12	arrhythmic	17	11	0.0155126	14	3	10	arrhythmic	13	7	0.621919	6	5	3	arrhythmic	6	9	0.142701	12	5	8	arrhythmic	11	2	0.143926	19	16	11	arrhythmic	17	12	0.0478203	18	6
OG0005373	Lthed_scf0090.1_g023550.1	Qgl_scf0060.1_g089850.1			0.335261	12	8	3	arrhythmic	11	5	0.446985	13	11	12	arrhythmic	12	8	0.993647	9	1	6	arrhythmic	8	5	0.00113254	18	15	6	arrhythmic	17	6	0.0096798	12	7	9	annual	11	4	5.25852e-07	13	10	8	annual	12	7	0.000473279	14	12
OG0005374	Lthed_scf0050.1_g121510.1	Qgl_scf0040.1_g151390.1	AT5G26742.2	AT5G26742.2	0.000698511	14	5	4	annual	13	2	0.00880037	13	1	10	annual	12	10	0.0018579	12	10	5	annual	11	1	0.0111737	13	7	10	arrhythmic	12	11	9.48803e-10	12	4	8	annual	11	1	4.08268e-06	14	4	5	annual	13	1	6.5876e-08	13	10
OG0005381	Lthed_scf0100.1_g083630.1	Qgl_scf0100.1_g020750.1	AT3G50560.1	AT3G50560.1	0.00911849	13	4	6	annual	12	1	5.551e-08	13	3	6	annual	12	12	5.74462e-06	13	8	8	annual	12	12	9.45895e-06	13	7	8	annual	12	11	0.101195	13	4	2	arrhythmic	12	1	1.47636e-06	13	4	3	annual	12	1	0.00387651	15	9
OG0005382	Lthed_scf0100.1_g085900.1	Qgl_scf0100.1_g018520.1	AT3G50430.1	AT3G50430.1	0.0027787	13	3	9	annual	12	12	1.02301e-05	13	3	9	annual	12	12	0.00523066	23	20	11	arrhythmic	21	11	0.0778279	7	6	3	arrhythmic	6	10	8.11411e-06	14	2	8	annual	13	11	5.126e-07	13	3	7	annual	12	12	0.0761539	23	19
OG0005383	Lthed_scf0100.1_g086490.1	Qgl_scf0100.1_g018030.1	AT3G50390.1	AT3G50390.1	0.00119759	13	10	7	annual	12	7	0.00533871	13	6	11	annual	12	3	0.999999	13	13	11	arrhythmic	12	4	0.357508	12	3	6	arrhythmic	11	7	0.0177335	12	9	8	arrhythmic	11	6	1.28158e-06	13	11	5	annual	12	8	1.02908e-05	14	2
OG0005385	Lthed_scf0100.1_g086740.1	Qgl_scf0100.1_g017870.1	AT3G50830.1	AT3G50830.1	0.0326182	6	3	4	arrhythmic	6	12	0.000247286	14	3	5	annual	13	12	0.520586	18	5	6	arrhythmic	17	9	5.13803e-06	13	8	8	annual	12	12	2.00985e-06	12	4	2	annual	11	1	0.450996	14	12	1	arrhythmic	13	9	0.000139818	15	9
OG0005386	Lthed_scf0100.1_g086990.1	Qgl_scf0100.1_g017790.1	AT2G29760.1	AT2G29760.1	0.643012	7	6	4	arrhythmic	6	3	0.657913	14	2	8	arrhythmic	13	11	0.000337556	13	8	6	annual	12	12	0.528595	6	1	4	arrhythmic	6	5	0.92265	5	3	3	arrhythmic	5	12	0.839864	12	11	11	arrhythmic	11	8	0.0273886	16	6
OG0005387	Lthed_scf0100.1_g087020.1	Qgl_scf0100.1_g017730.1	AT2G23690.1	AT2G23690.1	0.533244	12	8	10	arrhythmic	11	5	0.280224	12	12	4	arrhythmic	11	9	1	14	13	10	arrhythmic	13	4	0.189705	11	3	8	arrhythmic	10	7	0.000914137	13	11	5	annual	12	8	9.17926e-07	13	10	7	annual	12	7	0.00194867	12	2
OG0005388	Lthed_scf0100.1_g088160.1	Qgl_scf0100.1_g016350.1	AT2G18630.1	AT2G18630.2	0.294931	9	7	1	arrhythmic	8	4	0.13667	22	6	20	arrhythmic	20	3	0.0577849	11	10	7	arrhythmic	10	1	0.000185356	12	10	5	annual	11	1	0.00799967	16	6	14	annual	15	3	0.059511	10	6	4	arrhythmic	9	3	0.0529537	18	6
OG0005389	Lthed_scf0100.1_g088330.1	Qgl_scf0100.1_g016220.1	AT1G75080.2	AT1G75080.2	0.0010213	12	6	7	annual	11	3	4.18665e-05	12	4	9	annual	11	1	1.81853e-06	13	9	9	annual	12	1	2.42689e-08	13	9	9	annual	12	12	0.102554	11	6	6	arrhythmic	10	3	2.60702e-05	13	9	5	annual	12	6	0.0503598	13	11
OG0005390	Lthed_scf0100.1_g090320.1	Qgl_scf0100.1_g014570.1	AT5G66770.1	AT5G66770.1	0.988573	6	1	2	arrhythmic	6	10	0.0586103	7	5	4	arrhythmic	6	2	0.0011764	7	7	3	half-annual	6	11	0.00109149	12	4	6	annual	11	8	0.00136139	11	5	10	annual	10	2	0.0483473	13	5	9	arrhythmic	12	2	0.00347284	14	7
OG0005392	Lthed_scf0100.1_g091280.1	Qgl_scf0100.1_g013730.1	AT2G18280.2	AT2G18280.2	0.119172	6	3	4	arrhythmic	6	12	0.218307	16	12	14	arrhythmic	15	9	0.0351667	14	13	4	arrhythmic	13	4	0.0041375	18	14	17	arrhythmic	17	5	0.000315167	12	12	5	annual	11	9	0.970266	13	7	8	arrhythmic	12	4	0.102221	14	7
OG0005394	Lthed_scf0100.1_g092920.1	Qgl_scf0100.1_g011190.1	AT4G24660.1	AT4G24660.1	0.482042	7	7	4	arrhythmic	6	4	0.0250264	12	12	9	arrhythmic	11	9	0.813792	10	3	4	arrhythmic	9	7	0.240597	6	2	2	arrhythmic	6	6	0.316322	19	19	2	arrhythmic	17	3	0.0156862	13	11	3	arrhythmic	12	8	0.0792689	14	12
OG0005395	Lthed_scf0090.1_g093390.1	Qgl_scf0060.1_g006060.1	AT3G07220.1	AT3G07220.1	0.00366607	11	2	7	annual	10	11	0.152357	23	10	6	arrhythmic	21	7	0.158719	13	5	3	arrhythmic	12	9	0.0358305	15	1	14	arrhythmic	14	5	0.0368152	7	3	4	arrhythmic	6	12	0.414117	23	5	15	arrhythmic	21	2	0.44905	11	6
OG0005396	Lthed_scf0040.1_g033690.1	Qgl_scf0050.1_g104100.1	AT4G00730.1	AT4G00730.1	0.36614	23	16	21	arrhythmic	21	12	0.150369	11	2	8	arrhythmic	10	11	0.987566	7	6	5	arrhythmic	6	10	0.927085	8	6	4	arrhythmic	7	10	0.0586082	13	4	1	arrhythmic	12	1	0.0125613	13	2	12	arrhythmic	12	11	0.13068	14	3
OG0005397	Lthed_scf0040.1_g033880.1	Qgl_scf0050.1_g104010.1	AT2G45770.1	AT2G45770.1	0.916567	8	6	1	arrhythmic	7	3	0.893637	6	2	4	arrhythmic	6	11	0.187347	15	7	5	arrhythmic	14	11	0.00957704	11	8	3	annual	10	12	5.57363e-07	13	4	6	annual	12	1	0.000115077	16	3	6	annual	15	12	0.0588773	13	12
OG0005398	Lthed_scf0040.1_g034990.1	Qgl_scf0050.1_g102730.1	AT4G00590.1	AT4G00590.1	0.982604	10	4	4	arrhythmic	9	1	0.000290627	13	5	6	annual	12	2	0.864665	18	9	12	arrhythmic	17	1	0.901373	13	1	7	arrhythmic	12	5	0.0401819	12	5	1	arrhythmic	11	2	1.29604e-07	13	4	7	annual	12	1	6.11885e-05	13	11
OG0005399	Lthed_scf0040.1_g035040.1	Qgl_scf0050.1_g102690.1	AT1G01780.1	AT1G01780.1	1	23	22	6	arrhythmic	21	6	1	9	7	6	arrhythmic	8	4	1	5	3	2	arrhythmic	5	7	1	11	3	6	arrhythmic	10	7	1	2	1	1	arrhythmic	2	10	1	14	6	8	arrhythmic	13	3	1	14	13
OG0005400	Lthed_scf0040.1_g035050.1	Qgl_scf0050.1_g102680.1	AT1G01770.1	AT1G01770.1	0.91026	6	1	2	arrhythmic	6	10	0.0897387	7	3	2	arrhythmic	6	12	0.11393	15	1	12	arrhythmic	14	5	0.0186306	18	14	8	arrhythmic	17	5	0.000197992	13	5	2	annual	12	2	0.00101975	12	5	3	annual	11	2	0.0484837	6	5
OG0005401	Lthed_scf0040.1_g035290.1	Qgl_scf0050.1_g102550.1	AT1G01760.4	AT1G01760.3	0.193873	13	11	6	arrhythmic	12	8	2.98969e-06	12	11	5	annual	11	8	0.000394421	13	3	7	annual	12	7	0.000153242	13	5	5	annual	12	9	0.70059	6	5	3	arrhythmic	6	2	0.421999	21	10	17	arrhythmic	19	7	0.00307759	13	5
OG0005402	Lthed_scf0040.1_g035890.1	Qgl_scf0050.1_g101480.1	AT3G61320.1	AT3G61320.1	0.0244027	7	6	3	arrhythmic	6	3	0.997982	14	13	3	arrhythmic	13	10	0.0251321	13	7	2	arrhythmic	12	11	0.0574563	13	7	2	arrhythmic	12	11	0.131616	4	2	2	arrhythmic	4	11	0.0509684	12	7	2	arrhythmic	11	4	0.000213575	15	1
OG0005403	Lthed_scf0040.1_g035950.1	Qgl_scf0050.1_g101440.1	AT4G00525.1	AT4G00525.1	0.00807517	12	6	7	annual	11	3	0.962487	6	6	4	arrhythmic	6	3	0.0690879	12	12	5	arrhythmic	11	3	0.300271	11	3	6	arrhythmic	10	7	0.993713	8	1	6	arrhythmic	7	10	0.00178163	13	10	6	annual	12	7	0.246897	14	12
OG0005404	Lthed_scf0040.1_g036060.1	Qgl_scf0050.1_g101240.1	AT3G49050.1	AT4G00500.2	0.0795565	12	5	3	arrhythmic	11	2	0.000642078	13	4	9	annual	12	1	0.217501	13	9	9	arrhythmic	12	1	0.00789335	12	10	8	annual	11	1	0.00309916	12	5	2	annual	11	2	0.00102985	12	4	5	annual	11	1	0.00351993	14	11
OG0005405	Lthed_scf0110.1_g020610.1	Qgl_scf0110.1_g064760.1	AT2G26800.5	AT2G26800.5	1.7081e-09	13	11	6	annual	12	8	0.00178289	22	10	2	arrhythmic	20	7	0.00575356	13	5	3	annual	12	9	0.393571	14	3	5	arrhythmic	13	7	0.02439	6	5	3	arrhythmic	6	2	0.137276	14	3	10	arrhythmic	13	12	0.83136	7	3
OG0005406	Lthed_scf0040.1_g037630.1	Qgl_scf0050.1_g099820.1	AT4G00370.1	AT4G00370.1	0.279003	7	7	2	arrhythmic	6	4	0.896522	6	1	3	arrhythmic	6	10	0.225025	14	1	12	arrhythmic	13	5	0.000574931	11	5	6	annual	10	9	0.990747	3	2	1	arrhythmic	3	11	0.0195901	6	1	3	arrhythmic	6	10	0.025553	14	12
OG0005407	Lthed_scf0030.1_g070490.1	Qgl_scf0010.1_g117240.1	AT1G01490.2	AT1G01490.2	2.70761e-07	13	8	9	annual	12	5	3.44518e-07	13	11	5	annual	12	8	0.0174492	7	6	3	arrhythmic	6	10	0.00267998	13	13	11	annual	12	4	3.49038e-08	12	7	10	annual	11	4	1.18506e-10	13	10	6	annual	12	7	0.00427772	13	1
OG0005408	Lthed_scf0030.1_g070400.1	Qgl_scf0010.1_g117250.1	AT3G61510.1	AT3G61510.1	1	12	12	7	arrhythmic	11	9	0.999635	8	4	4	arrhythmic	7	1	0.999994	6	5	4	arrhythmic	6	9	0.215623	13	13	7	arrhythmic	12	4	1	12	7	9	arrhythmic	11	4	0.000397126	13	9	8	annual	12	6	1	15	11
OG0005410	Lthed_scf0030.1_g076470.1	Qgl_scf0010.1_g110090.1	AT1G64850.1	AT1G64850.1	3.57486e-05	13	3	6	annual	12	12	0.0041343	12	3	9	annual	11	12	0.958617	10	4	7	arrhythmic	9	8	0.0615975	13	2	9	arrhythmic	12	6	6.32293e-05	12	3	5	annual	11	12	1.1314e-05	13	3	7	annual	12	12	0.0266704	14	10
OG0005411	Lthed_scf0030.1_g063320.1	Qgl_scf0010.1_g127870.1	AT4G01210.1	AT4G01210.1	0.445514	7	2	4	arrhythmic	6	11	0.0779519	7	3	3	arrhythmic	6	12	0.315195	13	1	1	arrhythmic	12	5	9.40869e-05	12	11	5	annual	11	2	0.0475862	13	8	10	arrhythmic	12	5	0.267582	23	20	13	arrhythmic	21	4	0.686784	13	1
OG0005412	Lthed_scf0030.1_g065410.1	Qgl_scf0010.1_g122330.1	AT3G61690.3	AT3G61690.3	0.0241404	17	4	5	arrhythmic	16	1	2.68061e-09	13	3	8	annual	12	12	4.31992e-05	12	12	3	annual	11	3	0.0195625	23	20	21	arrhythmic	21	11	6.67559e-07	12	4	3	annual	11	1	1.50565e-08	13	4	6	annual	12	1	0.00078226	13	11
OG0005413	Lthed_scf0030.1_g064090.1	Qgl_scf0010.1_g125060.1	AT2G46420.3	AT2G46420.3	0.447026	7	3	5	arrhythmic	6	12	0.0121433	14	3	5	arrhythmic	13	12	0.68974	9	5	5	arrhythmic	8	9	0.971201	12	9	1	arrhythmic	11	12	0.00797071	14	1	6	annual	13	10	2.73555e-05	15	2	8	annual	14	11	1.11954e-05	13	9
OG0005415	Lthed_scf0040.1_g041060.1	Qgl_scf0050.1_g096380.1	AT2G46700.1	AT2G46700.1	0.00816108	12	9	7	annual	11	6	0.270033	21	21	6	arrhythmic	19	5	0.270677	14	13	8	arrhythmic	13	4	0.0861102	13	13	8	arrhythmic	12	4	0.00258702	11	1	3	annual	10	10	0.000743465	13	11	5	annual	12	8	0.00805315	14	3
OG0005417	Lthed_scf0040.1_g040060.1	Qgl_scf0050.1_g096780.1	AT4G00830.6	AT4G00830.6	0.00127586	12	4	7	annual	11	1	2.99321e-09	13	3	8	annual	12	12	0.00455181	13	11	3	annual	12	2	1.86985e-06	12	11	3	annual	11	2	5.62921e-06	12	4	6	annual	11	1	5.93664e-08	13	4	7	annual	12	1	2.45964e-06	13	10
OG0005418	Lthed_scf0030.1_g075180.1	Qgl_scf0010.1_g112030.1	AT5G17660.1	AT5G17660.1	4.50681e-05	14	11	6	annual	13	8	0.0174009	13	10	7	arrhythmic	12	7	0.00117323	13	4	6	annual	12	8	2.65211e-05	12	6	4	annual	11	10	0.000611679	11	8	8	annual	10	5	0.427566	15	3	6	arrhythmic	14	12	0.190363	13	4
OG0005419	Lthed_scf0030.1_g075040.1	Qgl_scf0010.1_g112160.1	AT5G17690.1	AT5G17690.1	0.201793	13	5	4	arrhythmic	12	2	0.00844852	13	4	5	annual	12	1	0.0311424	6	5	3	arrhythmic	6	9	0.45922	12	9	1	arrhythmic	11	12	0.000442849	13	4	3	annual	12	1	0.0814713	22	4	12	arrhythmic	20	1	0.000159006	12	10
OG0005420	Lthed_scf0040.1_g047740.1	Qgl_scf0050.1_g089400.1	AT3G58750.1	AT3G58750.1	0.235502	15	8	9	arrhythmic	14	5	0.983593	13	8	5	arrhythmic	12	5	0.00120169	14	8	8	annual	13	12	0.00177646	13	9	6	annual	12	12	0.00324035	12	11	5	annual	11	8	4.54014e-08	13	9	9	annual	12	6	0.426148	14	10
OG0005422	Lthed_scf0020.1_g172730.1	Qgl_scf0030.1_g010220.1	AT3G21215.4	AT3G21215.4	0.0251674	12	1	2	arrhythmic	11	10	7.38931e-06	13	11	5	annual	12	8	0.017367	14	3	4	arrhythmic	13	7	0.0060865	12	2	8	annual	11	6	0.00358746	12	12	2	annual	11	9	1.87694e-05	12	12	3	annual	11	9	0.000557783	15	3
OG0005423	Lthed_scf0070.1_g095050.1	Qgl_scf0080.1_g088200.1	AT1G06130.2	AT1G06130.2	0.0596229	19	18	9	arrhythmic	17	2	0.0235301	12	4	8	arrhythmic	11	1	0.351091	11	4	3	arrhythmic	10	8	0.240659	6	4	4	arrhythmic	6	8	0.029611	6	3	2	arrhythmic	6	12	9.4025e-08	14	2	8	annual	13	11	0.000164493	13	8
OG0005428	Lthed_scf0070.1_g089070.1	Qgl_scf0080.1_g081370.1	AT1G58210.1	AT1G58210.1	0.0688239	18	8	14	arrhythmic	17	5	0.0130192	13	10	9	arrhythmic	12	7	0.00551957	13	2	9	annual	12	6	2.82195e-05	13	3	7	annual	12	7	0.146179	12	1	5	arrhythmic	11	10	0.839273	22	3	2	arrhythmic	20	12	0.00255264	14	2
OG0005429	Lthed_scf0070.1_g088990.1	Qgl_scf0080.1_g081340.1	AT3G59350.6	AT3G59350.6	0.151564	7	2	4	arrhythmic	6	11	0.00183722	14	2	7	annual	13	11	0.976078	13	8	12	arrhythmic	12	12	8.22794e-05	12	11	5	annual	11	2	4.46747e-07	12	4	5	annual	11	1	0.000269998	22	16	12	arrhythmic	20	12	0.481156	7	2
OG0005431	Lthed_scf0070.1_g086660.1	Qgl_scf0080.1_g078700.1	AT1G05805.1	AT1G05805.1	6.61746e-07	13	3	9	annual	12	12	6.98158e-08	13	3	9	annual	12	12	0.00139014	15	8	9	annual	14	12	0.00100396	13	9	4	annual	12	12	0.000318127	12	3	5	annual	11	12	0.000601985	13	4	3	annual	12	1	0.0390371	7	2
OG0005432	Lthed_scf0070.1_g086640.1	Qgl_scf0080.1_g078680.1	AT2G43120.1	AT2G43120.1	0.00041766	12	10	5	annual	11	7	0.0200775	6	5	4	arrhythmic	6	2	3.47751e-05	13	12	8	annual	12	3	0.000879376	12	10	9	annual	11	1	0.868907	12	9	11	arrhythmic	11	6	0.000244432	15	10	9	annual	14	7	0.0215965	14	11
OG0005433	Lthed_scf0070.1_g085910.1	Qgl_scf0080.1_g077860.1	AT2G43080.1	AT2G43080.1	0.21369	12	11	5	arrhythmic	11	8	0.042535	7	4	4	arrhythmic	6	1	0.986664	12	3	11	arrhythmic	11	7	0.319341	6	4	4	arrhythmic	6	8	0.0227503	12	11	3	arrhythmic	11	8	0.0418164	13	12	3	arrhythmic	12	9	0.945451	8	7
OG0005434	Lthed_scf0100.1_g059370.1	Qgl_scf0100.1_g052950.1	AT3G07880.1	AT3G07880.1	0.271428	17	10	1	arrhythmic	16	7	0.325101	7	4	3	arrhythmic	6	1	0.000229239	16	13	10	annual	15	4	0.0238656	13	1	8	arrhythmic	12	5	8.47643e-05	13	8	9	annual	12	5	2.24474e-10	13	11	4	annual	12	8	0.000115403	12	2
OG0005435	Lthed_scf0100.1_g058400.1	Qgl_scf0100.1_g053830.1	AT3G23670.1	AT3G23670.1	0.00966126	14	3	7	annual	13	12	0.305038	13	4	5	arrhythmic	12	1	0.00234971	13	11	7	annual	12	2	6.54005e-05	12	11	5	annual	11	2	0.00936581	12	7	10	annual	11	4	1.435e-06	13	10	6	annual	12	7	0.0196624	14	12
OG0005437	Lthed_scf0030.1_g026960.1	Qgl_scf0010.1_g162610.1	AT1G56090.1	AT1G56090.1	0.204505	23	16	16	arrhythmic	21	12	0.00726623	7	2	4	half-annual	6	11	0.181707	23	9	8	arrhythmic	21	1	0.000198871	12	9	7	annual	11	12	2.38277e-06	12	4	4	annual	11	1	1.04841e-08	14	2	9	annual	13	11	0.024505	14	10
OG0005438	Lthed_scf0100.1_g046500.1	Qgl_scf0100.1_g060190.1	AT2G32730.1	AT2G32730.1	2.77203e-06	13	4	8	annual	12	1	2.20112e-07	13	4	6	annual	12	1	1.87574e-05	13	8	9	annual	12	12	6.74498e-05	12	11	5	annual	11	2	3.2055e-08	13	3	7	annual	12	12	0.000558004	12	4	8	annual	11	1	3.42565e-05	14	9
OG0005439	Lthed_scf0100.1_g045460.1	Qgl_scf0100.1_g059550.1	AT3G24170.3	AT3G24170.3	0.00930533	12	3	9	annual	11	12	2.63604e-07	13	7	4	annual	12	4	8.02052e-08	14	8	9	annual	13	12	1.46376e-05	14	8	9	annual	13	12	3.3427e-06	12	4	8	annual	11	1	0.0494029	14	2	12	arrhythmic	13	11	0.000122599	15	8
OG0005440	Lthed_scf0100.1_g045120.1	Qgl_scf0100.1_g062850.1	AT3G24180.2	AT3G24180.2	0.0764021	22	2	12	arrhythmic	20	11	0.0198979	7	3	3	arrhythmic	6	12	3.7108e-05	13	10	8	annual	12	1	1.51633e-07	12	10	7	annual	11	1	0.000124807	6	4	3	half-annual	6	1	0.203381	7	2	4	arrhythmic	6	11	0.000431734	13	11
OG0005442	Lthed_scf0100.1_g044200.1	Qgl_scf0100.1_g063660.1	AT2G33150.1	AT2G33150.1	0.0152564	14	3	9	arrhythmic	13	12	0.000108976	13	4	8	annual	12	1	0.000133877	13	11	4	annual	12	2	6.42356e-07	13	10	6	annual	12	1	1.66282e-07	13	3	9	annual	12	12	9.16401e-05	15	2	9	annual	14	11	1.95503e-06	14	9
OG0005443	Lthed_scf0100.1_g028720.1	Qgl_scf0100.1_g080100.1	AT3G06483.1	AT3G06483.1	0.000150308	13	3	5	annual	12	12	2.48218e-12	12	4	8	annual	11	1	4.01703e-06	14	10	6	annual	13	1	1.44332e-07	12	10	6	annual	11	1	2.20242e-09	12	3	9	annual	11	12	5.43167e-08	13	4	8	annual	12	1	6.44456e-08	14	10
OG0005444	Lthed_scf0100.1_g028650.1	Qgl_scf0100.1_g080180.1	AT3G17440.1	AT3G17440.1	0.000261412	13	9	9	annual	12	6	0.000101543	12	12	7	annual	11	9	1.22468e-06	14	13	12	annual	13	4	0.0321615	13	1	11	arrhythmic	12	5	0.00028037	13	11	5	annual	12	8	5.27209e-06	14	10	8	annual	13	7	0.00201205	14	14
OG0005445	Lthed_scf0100.1_g028200.1	Qgl_scf0100.1_g080600.1	AT2G22300.2	AT2G22300.2	0.499365	9	8	7	arrhythmic	8	5	0.00322898	14	3	9	annual	13	12	0.636863	14	12	3	arrhythmic	13	3	1.36589e-06	12	10	6	annual	11	1	0.0704543	12	4	7	arrhythmic	11	1	0.000277944	13	4	6	annual	12	1	0.00999874	7	3
OG0005446	Lthed_scf0100.1_g027890.1	Qgl_scf0100.1_g080780.1	AT1G48110.2	AT1G48110.2	6.18088e-08	13	4	5	annual	12	1	3.11538e-10	13	4	7	annual	12	1	3.62509e-06	13	8	9	annual	12	12	3.29843e-07	13	11	5	annual	12	2	2.27106e-05	12	3	10	annual	11	12	9.12698e-09	14	2	8	annual	13	11	0.000623777	14	8
OG0005447	Lthed_scf0100.1_g027760.1	Qgl_scf0100.1_g080880.1	AT1G48100.1	AT1G48100.1	1	14	8	10	arrhythmic	13	5	3.77207e-05	13	11	7	annual	12	8	0.808363	15	13	9	arrhythmic	14	4	0.000621904	13	3	5	annual	12	7	0.00683437	13	9	8	annual	12	6	0.158908	6	1	3	arrhythmic	6	10	8.83852e-05	13	1
OG0005448	Lthed_scf0100.1_g027400.1	Qgl_scf0100.1_g081200.1	AT3G17210.2	AT3G17210.2	0.00147992	15	11	6	annual	14	8	1.10568e-06	13	12	5	annual	12	9	0.058965	23	13	5	arrhythmic	21	4	0.000180399	12	4	8	annual	11	8	0.0180095	12	10	7	arrhythmic	11	7	1.77726e-06	13	10	7	annual	12	7	0.806415	15	12
OG0005449	Lthed_scf0100.1_g027210.1	Qgl_scf0100.1_g081280.1	AT5G30510.1	AT5G30510.1	0.476207	21	6	2	arrhythmic	19	3	0.176572	12	1	11	arrhythmic	11	10	0.107813	14	3	10	arrhythmic	13	7	0.199008	11	7	6	arrhythmic	10	11	0.010974	12	6	5	arrhythmic	11	3	0.00464658	13	5	7	annual	12	2	0.984568	12	1
OG0005450	Lthed_scf0100.1_g026830.1	Qgl_scf0100.1_g081480.1	AT1G02400.1	AT1G02400.1	0.275045	14	12	5	arrhythmic	13	9	0.00390432	13	9	7	annual	12	6	0.592448	7	5	3	arrhythmic	6	9	0.0182668	14	3	5	arrhythmic	13	7	0.00549387	13	11	6	annual	12	8	4.9521e-06	14	10	6	annual	13	7	0.000245479	14	2
OG0005451	Lthed_scf0100.1_g025960.1	Qgl_scf0100.1_g082460.1	AT3G17120.5	AT3G17120.5	0.0851794	7	2	4	arrhythmic	6	11	0.792428	11	2	6	arrhythmic	10	11	0.71757	11	2	4	arrhythmic	10	6	0.127425	23	9	17	arrhythmic	21	12	0.593635	11	8	10	arrhythmic	10	5	3.51765e-05	13	11	7	annual	12	8	0.643397	16	8
OG0005454	Lthed_scf0100.1_g024720.1	Qgl_scf0100.1_g083450.1	AT1G67890.1	AT5G49470.3	0.152978	13	11	5	arrhythmic	12	8	5.4347e-07	13	11	4	annual	12	8	2.15062e-06	13	5	4	annual	12	9	0.0135982	13	1	9	arrhythmic	12	5	0.294356	12	6	9	arrhythmic	11	3	0.00168449	12	11	3	annual	11	8	0.0125237	14	12
OG0005455	Lthed_scf0100.1_g023220.1	Qgl_scf0100.1_g084160.1	AT5G49430.2	AT5G49430.2	0.371341	7	3	5	arrhythmic	6	12	0.000162924	13	4	7	annual	12	1	0.00514628	14	10	3	annual	13	1	0.000593112	12	11	5	annual	11	2	0.00349894	12	5	2	annual	11	2	1.07113e-09	13	4	6	annual	12	1	1.50712e-05	13	11
OG0005456	Lthed_scf0100.1_g022720.1	Qgl_scf0100.1_g084520.1	AT2G47460.1	AT2G47460.1	1	10	8	6	arrhythmic	9	5	1	12	12	4	arrhythmic	11	9	1	2	1	1	arrhythmic	2	5	1	2	2	1	arrhythmic	2	6	1.87373e-06	12	7	9	annual	11	4	5.93494e-08	13	10	6	annual	12	7	1.67225e-07	13	9
OG0005457	Lthed_scf0100.1_g022050.1	Qgl_scf0100.1_g085120.1	AT4G16110.1	AT4G16110.1	0.0138967	12	8	8	arrhythmic	11	5	0.022476	14	11	7	arrhythmic	13	8	0.165277	12	4	6	arrhythmic	11	8	0.463717	12	8	11	arrhythmic	11	12	0.772281	6	6	2	arrhythmic	6	3	0.0271082	13	13	5	arrhythmic	12	10	0.0164989	12	4
OG0005459	Lthed_scf0100.1_g019240.1	Qgl_scf0100.1_g087510.1	AT3G06850.2	AT3G06850.2	0.758458	8	5	4	arrhythmic	7	2	0.553892	14	3	13	arrhythmic	13	12	0.532598	3	2	1	arrhythmic	3	6	0.000157722	15	13	1	annual	14	4	0.00335352	15	3	6	annual	14	12	4.92453e-05	14	4	6	annual	13	1	4.53794e-05	13	10
OG0005461	Lthed_scf0100.1_g019160.1	Qgl_scf0100.1_g087670.1	AT3G06860.1	AT3G06860.1	0.00836274	13	10	8	annual	12	7	5.61264e-05	14	9	10	annual	13	6	0.0220494	19	8	17	arrhythmic	17	12	0.241964	17	13	6	arrhythmic	16	4	0.0920184	6	5	3	arrhythmic	6	2	0.00276395	13	13	4	annual	12	10	0.114549	7	1
OG0005462	Lthed_scf0100.1_g018570.1	Qgl_scf0100.1_g088020.1	AT3G06868.1	AT3G06868.1	0.0272411	14	8	12	arrhythmic	13	5	0.343625	13	6	8	arrhythmic	12	3	0.571678	16	11	11	arrhythmic	15	2	0.00043901	13	1	8	annual	12	5	2.69541e-05	13	11	4	annual	12	8	2.68616e-06	14	10	6	annual	13	7	2.89208e-05	15	4
OG0005463	Lthed_scf0100.1_g015720.1	Qgl_scf0100.1_g089490.1	AT4G15790.1	AT4G15790.1	0.0140813	10	8	5	arrhythmic	9	5	0.0833608	13	4	6	arrhythmic	12	1	0.0162708	14	13	3	arrhythmic	13	4	0.834708	17	14	8	arrhythmic	16	5	0.0385543	10	9	4	arrhythmic	9	6	1.83216e-06	13	10	7	annual	12	7	0.00786674	14	12
OG0005464	Lthed_scf0100.1_g013500.1	Qgl_scf0100.1_g091840.1	AT5G18640.3	AT5G18640.3	0.00225971	12	9	6	annual	11	6	0.000333332	14	9	7	annual	13	6	4.96293e-05	14	3	7	annual	13	7	0.000219311	13	3	5	annual	12	7	0.777808	11	9	6	arrhythmic	10	6	0.00290963	13	9	7	annual	12	6	0.000340203	13	3
OG0005465	Lthed_scf0100.1_g013440.1	Qgl_scf0100.1_g091860.1	AT5G18650.1	AT5G18650.1	0.19295	12	3	10	arrhythmic	11	12	0.0257618	23	8	2	arrhythmic	21	5	0.00143476	14	9	6	annual	13	1	2.83844e-05	13	8	10	annual	12	12	0.0621181	13	4	3	arrhythmic	12	1	0.0369509	13	4	7	arrhythmic	12	1	0.00114647	14	10
OG0005466	Lthed_scf0100.1_g013220.1	Qgl_scf0100.1_g091910.1	AT3G06390.1	AT3G06390.1	0.23605	11	11	5	arrhythmic	10	8	0.0160375	13	11	7	arrhythmic	12	8	0.00209456	7	5	2	half-annual	6	9	0.922041	13	5	1	arrhythmic	12	9	0.674625	12	11	7	arrhythmic	11	8	0.357284	6	4	3	arrhythmic	6	1	0.0134072	7	3
OG0005467	Lthed_scf0100.1_g012000.1	Qgl_scf0100.1_g093070.1	AT3G06330.1	AT3G06330.1	7.06784e-05	21	20	9	arrhythmic	19	4	0.0748306	13	13	4	arrhythmic	12	10	0.00955691	7	7	4	half-annual	6	11	0.160504	23	22	20	arrhythmic	21	12	0.000368809	20	14	14	arrhythmic	18	10	0.00211927	13	1	3	annual	12	10	0.0747956	18	14
OG0005469	Lthed_scf0100.1_g011370.1	Qgl_scf0100.1_g093960.1	AT5G18800.2	AT5G18800.2	0.0541778	23	3	16	arrhythmic	21	12	0.089657	12	12	4	arrhythmic	11	9	0.0198133	14	13	6	arrhythmic	13	4	0.122139	11	4	4	arrhythmic	10	8	0.0312333	6	1	4	arrhythmic	6	10	4.5454e-07	13	10	7	annual	12	7	0.106355	13	1
OG0005471	Lthed_scf0100.1_g010080.1	Qgl_scf0100.1_g095870.1	AT5G35630.3	AT5G35630.3	0.246428	13	6	11	arrhythmic	12	3	0.0135396	15	8	9	arrhythmic	14	5	2.3353e-05	14	4	4	annual	13	8	0.0102491	12	6	4	arrhythmic	11	10	2.78888e-07	12	8	8	annual	11	5	4.44771e-08	14	9	7	annual	13	6	7.48177e-07	14	13
OG0005472	Lthed_scf0100.1_g010000.1	Qgl_scf0100.1_g095970.1	AT5G19010.1	AT5G19010.1	0.318749	12	6	8	arrhythmic	11	3	0.0119936	14	8	8	arrhythmic	13	5	0.00331888	13	12	3	annual	12	3	0.000954555	11	11	7	annual	10	2	0.229471	6	2	3	arrhythmic	6	11	0.00719813	7	6	4	half-annual	6	3	0.0840234	10	4
OG0005473	Lthed_scf0100.1_g009090.1	Qgl_scf0100.1_g096760.1	AT4G14240.1	AT4G14240.1	0.0765088	8	6	2	arrhythmic	7	3	0.978957	6	3	4	arrhythmic	6	12	0.000877364	12	3	7	annual	11	7	1.56771e-05	12	2	8	annual	11	6	0.34395	10	4	4	arrhythmic	9	1	0.00496317	14	3	8	annual	13	12	0.704154	12	5
OG0005474	Lthed_scf0100.1_g007990.1	Qgl_scf0100.1_g097820.1	AT3G06150.1	AT3G06150.1	0.00224619	13	2	6	annual	12	11	1.31891e-05	12	12	10	annual	11	9	0.236138	7	7	4	arrhythmic	6	11	0.00321566	12	11	2	annual	11	2	8.75605e-05	13	4	3	annual	12	1	0.00246141	12	2	8	annual	11	11	0.00339866	12	9
OG0005475	Lthed_scf0100.1_g007900.1	Qgl_scf0100.1_g097900.1	AT3G06145.1	AT3G06145.1	9.49413e-07	13	9	7	annual	12	6	0.0101243	6	6	4	arrhythmic	6	3	0.00646009	12	3	6	annual	11	7	0.0842366	13	1	7	arrhythmic	12	5	0.00121459	12	8	9	annual	11	5	5.32382e-06	14	11	7	annual	13	8	0.000157649	14	13
OG0005476	Lthed_scf0100.1_g007890.1	Qgl_scf0100.1_g097910.1	AT5G19080.1	AT5G19080.1	0.00435676	23	17	16	arrhythmic	21	1	0.000179374	13	4	10	annual	12	1	0.96405	10	6	6	arrhythmic	9	10	0.00849193	7	2	5	half-annual	6	6	0.0919948	6	5	3	arrhythmic	6	2	0.00666192	19	15	16	arrhythmic	17	11	0.06825	7	3
OG0005477	Lthed_scf0100.1_g007340.1	Qgl_scf0100.1_g098290.1	AT5G19140.1	AT5G19140.1	0.192887	11	10	10	arrhythmic	10	7	0.00454095	15	10	2	annual	14	7	0.0165869	11	4	7	arrhythmic	10	8	0.00351911	12	6	4	annual	11	10	0.47957	10	5	3	arrhythmic	9	2	0.0738497	7	3	3	arrhythmic	6	12	0.20768	7	3
OG0005478	Lthed_scf0100.1_g006900.1	Qgl_scf0100.1_g098540.1	AT3G06050.1	AT3G06050.1	0.0233058	13	12	5	arrhythmic	12	9	0.000317258	13	13	4	annual	12	10	0.00050305	14	14	13	annual	13	5	0.711726	11	7	4	arrhythmic	10	11	0.0252916	13	11	4	arrhythmic	12	8	0.00238515	14	12	4	annual	13	9	0.0153447	15	14
OG0005479	Lthed_scf0100.1_g006790.1	Qgl_scf0100.1_g098760.1	AT3G05290.1	AT3G05290.1	0.000614222	12	8	4	annual	11	5	0.562038	16	5	4	arrhythmic	15	2	3.0041e-07	14	12	5	annual	13	3	0.0856368	13	1	2	arrhythmic	12	5	0.00264386	12	7	4	annual	11	4	0.00435365	12	8	4	annual	11	5	0.287175	20	11
OG0005481	Lthed_scf0100.1_g006200.1	Qgl_scf0100.1_g099370.1	AT5G19330.1	AT5G19330.1	0.0163948	12	12	6	arrhythmic	11	9	0.0198872	13	12	2	arrhythmic	12	9	0.458659	5	3	2	arrhythmic	5	7	0.00418224	20	17	16	arrhythmic	18	8	0.000335576	12	12	6	annual	11	9	5.97854e-05	13	11	7	annual	12	8	0.015227	14	14
OG0005482	Lthed_scf0100.1_g005800.1	Qgl_scf0100.1_g099670.1	AT5G26240.1	AT5G26240.1	4.04792e-05	13	12	3	annual	12	9	0.0456939	16	4	6	arrhythmic	15	1	0.240297	13	13	8	arrhythmic	12	4	0.171903	11	11	7	arrhythmic	10	2	0.0779512	6	4	3	arrhythmic	6	1	0.0553486	13	4	6	arrhythmic	12	1	0.268187	8	8
OG0005484	Lthed_scf0100.1_g004340.1	Qgl_scf0100.1_g101210.1	AT3G22430.1	AT3G22430.1	0.114842	23	11	21	arrhythmic	21	8	0.524853	7	4	5	arrhythmic	6	1	0.923325	7	3	4	arrhythmic	6	7	0.183143	6	4	4	arrhythmic	6	8	0.0656319	6	5	3	arrhythmic	6	2	0.000401938	13	10	6	annual	12	7	0.000464455	13	2
OG0005486	Lthed_scf0100.1_g003950.1	Qgl_scf0100.1_g101520.1	AT3G22480.2	AT3G22480.2	0.867317	3	2	1	arrhythmic	3	11	0.188827	13	13	6	arrhythmic	12	10	0.00964711	12	5	6	annual	11	9	0.283896	12	7	5	arrhythmic	11	11	0.0988233	12	6	1	arrhythmic	11	3	0.199826	7	3	4	arrhythmic	6	12	0.126917	23	7
OG0005488	Lthed_scf0070.1_g105450.1	Qgl_scf0080.1_g102180.1	AT2G43770.1	AT2G43770.1	0.18615	13	1	5	arrhythmic	12	10	0.378845	13	9	10	arrhythmic	12	6	0.0237824	15	2	6	arrhythmic	14	6	0.00509108	12	4	9	annual	11	8	8.41512e-06	11	3	9	annual	10	12	0.0190158	12	4	9	arrhythmic	11	1	0.00205321	23	22
OG0005489	Lthed_scf0070.1_g102230.1	Qgl_scf0080.1_g099660.1	AT1G05720.1	AT1G05720.1	0.0350747	13	4	7	arrhythmic	12	1	0.00442798	16	14	11	annual	15	10	0.246282	7	1	4	arrhythmic	6	5	0.0450302	13	11	1	arrhythmic	12	2	0.0138636	23	16	9	arrhythmic	21	12	0.0126499	22	17	10	arrhythmic	20	1	0.00648548	17	8
OG0005490	Lthed_scf0070.1_g102220.1	Qgl_scf0080.1_g099640.1	AT1G05710.5	AT1G05710.6	0.176967	6	6	4	arrhythmic	6	3	0.0195434	11	10	3	arrhythmic	10	7	0.00319201	13	11	6	annual	12	2	0.00116696	11	11	6	annual	10	2	0.00479097	13	5	12	annual	12	2	0.350811	14	5	11	arrhythmic	13	2	3.63306e-05	13	2
OG0005491	Lthed_scf0070.1_g100140.1	Qgl_scf0080.1_g097180.1	AT2G30695.3	AT2G30695.3	0.890638	12	1	7	arrhythmic	11	10	0.296614	23	1	8	arrhythmic	21	10	0.996795	23	6	17	arrhythmic	21	10	0.00588364	12	7	3	annual	11	11	0.268563	6	1	2	arrhythmic	6	10	0.975709	7	4	5	arrhythmic	6	1	0.0314491	22	6
OG0005492	Lthed_scf0070.1_g099440.1	Qgl_scf0080.1_g096090.1	AT1G65260.1	AT1G65260.1	0.172195	13	11	6	arrhythmic	12	8	0.863266	6	2	4	arrhythmic	6	11	0.0164972	14	3	10	arrhythmic	13	7	0.0413298	11	7	5	arrhythmic	10	11	0.00232817	6	5	3	half-annual	6	2	0.566536	23	19	8	arrhythmic	21	3	0.619896	19	15
OG0005493	Lthed_scf0070.1_g099150.1	Qgl_scf0080.1_g095630.1	AT3G59600.1	AT3G59600.1	0.00900792	19	4	13	arrhythmic	17	1	0.000664672	23	22	21	arrhythmic	21	6	0.937174	6	4	3	arrhythmic	6	8	0.00434242	23	13	9	arrhythmic	21	4	0.100894	20	4	15	arrhythmic	18	1	0.000327573	18	8	9	arrhythmic	17	5	0.875888	14	12
OG0005495	Lthed_scf0020.1_g009260.1	Qgl_scf0030.1_g180060.1	AT3G12070.3	AT5G12210.1	0.000537619	12	11	5	annual	11	8	0.00106057	18	7	9	arrhythmic	17	4	0.345973	12	4	3	arrhythmic	11	8	0.332279	13	5	3	arrhythmic	12	9	0.0220985	15	8	10	arrhythmic	14	5	4.20454e-05	13	9	10	annual	12	6	0.000331977	14	13
OG0005496	Lthed_scf0100.1_g039470.1	Qgl_scf0100.1_g067490.1	AT2G33310.3	AT2G33310.3	0.0903358	7	3	4	arrhythmic	6	12	0.0124788	13	5	6	arrhythmic	12	2	0.172494	14	12	1	arrhythmic	13	3	0.0921435	7	3	2	arrhythmic	6	7	0.43409	12	8	6	arrhythmic	11	5	0.000647371	13	11	4	annual	12	8	0.00150887	13	7
OG0005498	Lthed_scf0100.1_g038880.1	Qgl_scf0100.1_g067990.1	AT1G04510.1	AT1G04510.1	0.410794	23	20	7	arrhythmic	21	4	0.151968	13	4	5	arrhythmic	12	1	0.937977	14	5	7	arrhythmic	13	9	0.0750195	13	5	7	arrhythmic	12	9	0.340824	4	3	2	arrhythmic	4	12	0.0242712	10	10	6	arrhythmic	9	7	0.00297417	13	13
OG0005499	Lthed_scf0100.1_g038790.1	Qgl_scf0100.1_g068030.1	AT1G04500.4	AT1G04500.4	1	16	4	10	arrhythmic	15	1	0.00277279	13	8	7	annual	12	5	0.848428	6	6	3	arrhythmic	6	10	0.323971	12	1	9	arrhythmic	11	5	0.332302	7	6	4	arrhythmic	6	3	0.55292	13	1	10	arrhythmic	12	10	0.994206	8	6
OG0005500	Lthed_scf0100.1_g038700.1	Qgl_scf0100.1_g068210.1	AT5G35620.3	AT5G35620.3	0.0829066	15	1	10	arrhythmic	14	10	0.000816342	15	2	7	annual	14	11	0.00207612	7	1	4	half-annual	6	5	0.0171413	20	9	12	arrhythmic	18	12	0.00356889	12	7	3	annual	11	4	0.00477445	11	8	7	annual	10	5	0.0116823	14	12
OG0005501	Lthed_scf0100.1_g038680.1	Qgl_scf0100.1_g068220.1	AT2G05620.2	AT2G05620.2	0.0740208	7	6	4	arrhythmic	6	3	0.733854	10	8	6	arrhythmic	9	5	0.275789	14	7	9	arrhythmic	13	11	0.0423177	12	10	7	arrhythmic	11	1	6.26929e-05	12	3	9	annual	11	12	1.61134e-05	11	5	6	annual	10	2	0.00969242	14	11
OG0005502	Lthed_scf0100.1_g034780.1	Qgl_scf0100.1_g072190.1	AT4G14350.3	AT4G14350.3	3.07053e-06	12	7	5	annual	11	4	1.16808e-10	13	4	7	annual	12	1	6.23802e-06	14	12	5	annual	13	3	3.59271e-07	12	11	5	annual	11	2	0.000271725	12	4	7	annual	11	1	3.5602e-05	13	4	7	annual	12	1	0.000269222	14	9
OG0005503	Lthed_scf0100.1_g034700.1	Qgl_scf0100.1_g072210.1	AT1G04430.3	AT1G04430.3	1.7635e-05	7	1	4	half-annual	6	10	0.47718	13	1	9	arrhythmic	12	10	0.00122883	13	8	9	annual	12	12	0.08226	14	8	9	arrhythmic	13	12	0.000125064	6	2	3	half-annual	6	11	0.00066698	13	1	3	annual	12	10	0.0427221	13	8
OG0005504	Lthed_scf0100.1_g033240.1	Qgl_scf0100.1_g073130.1	AT3G54700.2	AT3G54700.2	0.0134113	16	3	5	arrhythmic	15	12	0.0522993	12	6	6	arrhythmic	11	3	2.73085e-05	14	9	6	annual	13	1	1.53611e-05	13	6	5	annual	12	10	9.89261e-06	12	3	5	annual	11	12	3.41664e-06	13	2	6	annual	12	11	8.99932e-09	14	10
OG0005506	Lthed_scf0100.1_g031280.1	Qgl_scf0100.1_g075260.1	AT3G23240.1	AT3G23240.1	0.981377	14	7	1	arrhythmic	13	4	0.0380771	14	3	8	arrhythmic	13	12	0.0895217	12	4	5	arrhythmic	11	8	0.0917842	12	11	9	arrhythmic	11	2	0.0998584	13	11	8	arrhythmic	12	8	0.147546	17	15	3	arrhythmic	16	11	0.041287	11	4
OG0005507	Lthed_scf0100.1_g031020.1	Qgl_scf0100.1_g075600.1	AT4G14410.3	AT4G14410.3	0.424214	12	8	5	arrhythmic	11	5	0.00604876	13	4	6	annual	12	1	0.000606346	13	11	5	annual	12	2	2.64701e-06	12	10	6	annual	11	1	0.00381257	13	6	7	annual	12	3	0.0250509	23	22	5	arrhythmic	21	6	4.66806e-05	13	8
OG0005508	Lthed_scf0100.1_g029710.1	Qgl_scf0100.1_g076690.1	AT3G23130.1	AT3G23130.1	1	2	1	1	arrhythmic	2	10	1	2	1	1	arrhythmic	2	10	1	2	1	1	arrhythmic	2	5	1	2	1	1	arrhythmic	2	5	1	2	2	1	arrhythmic	2	11	1	2	1	1	arrhythmic	2	10	1	13	7
OG0005509	Lthed_scf0010.1_g094190.1	Qgl_scf0020.1_g090640.1	AT1G56290.1	AT1G56290.1	1.24953e-05	13	4	8	annual	12	1	1.23516e-07	13	4	7	annual	12	1	0.0701348	6	3	4	arrhythmic	6	7	0.000158641	12	3	8	annual	11	7	0.00103802	12	4	6	annual	11	1	1.19103e-05	14	3	8	annual	13	12	0.00149654	13	10
OG0005511	Lthed_scf0100.1_g001440.1	Qgl_scf0100.1_g103770.1	AT3G22845.1	AT3G22845.1	9.28364e-05	13	11	5	annual	12	8	0.00772056	14	12	6	annual	13	9	0.771917	7	1	4	arrhythmic	6	5	0.0244782	6	4	3	arrhythmic	6	8	0.185576	16	15	11	arrhythmic	15	11	0.0688938	23	9	21	arrhythmic	21	6	0.519953	14	12
OG0005513	Lthed_scf0100.1_g002270.1	Qgl_scf0100.1_g102760.1	AT4G34670.1	AT4G34670.1	0.000388618	12	3	8	annual	11	12	1.33146e-07	14	2	9	annual	13	11	0.00631661	15	8	8	annual	14	12	0.315548	12	7	8	arrhythmic	11	11	7.54072e-08	12	3	7	annual	11	12	3.97823e-08	13	4	8	annual	12	1	2.54453e-07	13	11
OG0005515	Lthed_scf0100.1_g002520.1	Qgl_scf0100.1_g102400.1	AT3G22740.1	AT3G22740.1	4.82956e-07	13	11	5	annual	12	8	0.892433	6	3	3	arrhythmic	6	12	0.0068461	11	4	5	annual	10	8	0.000110082	14	1	8	annual	13	5	0.359689	16	5	10	arrhythmic	15	2	0.0039607	13	5	3	annual	12	2	0.00943199	15	15
OG0005516	Lthed_scf0070.1_g107490.1	Qgl_scf0080.1_g103220.1	AT3G59800.1	AT3G59800.1	0.0425989	11	5	4	arrhythmic	10	2	0.102313	12	4	9	arrhythmic	11	1	0.021465	14	11	1	arrhythmic	13	2	0.00222761	12	10	4	annual	11	1	0.76339	7	1	5	arrhythmic	6	10	0.11126	6	5	2	arrhythmic	6	2	0.0002011	12	10
OG0005517	Lthed_scf0070.1_g114890.1	Qgl_scf0080.1_g109430.1	AT2G31890.1	AT2G31890.1	0.0336896	7	6	3	arrhythmic	6	3	0.000828347	13	13	12	annual	12	10	1.95827e-06	14	8	5	annual	13	12	0.00520582	13	8	7	annual	12	12	1.10518e-05	12	4	4	annual	11	1	4.66915e-09	13	4	6	annual	12	1	8.61786e-08	13	10
OG0005519	Lthed_scf0020.1_g182830.1	Qgl_scf0030.1_g002130.1	AT1G16780.3	AT1G16780.3	0.152517	18	9	10	arrhythmic	17	6	0.557563	6	6	2	arrhythmic	6	3	0.406771	14	13	13	arrhythmic	13	4	0.126925	7	1	4	arrhythmic	6	5	0.495882	6	2	4	arrhythmic	6	11	0.0424638	13	1	4	arrhythmic	12	10	0.0224426	6	2
OG0005520	Lthed_scf0020.1_g183570.1	Qgl_scf0030.1_g000170.1	AT3G13020.1	AT3G13020.1	0.999837	3	2	1	arrhythmic	3	11	0.000718103	6	3	3	half-annual	6	12	0.151744	12	4	9	arrhythmic	11	8	0.946103	6	6	4	arrhythmic	6	10	0.00592131	12	5	3	annual	11	2	0.000131152	13	4	4	annual	12	1	0.955485	7	3
OG0005523	Lthed_scf0020.1_g004780.1	Qgl_scf0030.1_g185570.1	AT3G14205.1	AT3G14205.1	0.363831	6	4	4	arrhythmic	6	1	1.7934e-06	13	3	11	annual	12	12	5.62712e-06	13	4	3	annual	12	8	0.00236493	13	8	12	annual	12	12	0.442353	12	4	9	arrhythmic	11	1	0.00116791	14	3	12	annual	13	12	0.0949185	15	10
OG0005525	Lthed_scf0020.1_g007540.1	Qgl_scf0030.1_g181070.1	AT1G72390.2	AT1G72390.2	0.446795	19	16	18	arrhythmic	17	12	0.00117681	14	3	9	annual	13	12	0.572293	13	10	4	arrhythmic	12	1	0.000796573	23	21	21	arrhythmic	21	11	0.125523	6	4	3	arrhythmic	6	1	2.7203e-08	13	3	7	annual	12	12	0.00132004	13	11
OG0005528	Lthed_scf0020.1_g013380.1	Qgl_scf0030.1_g176760.1	AT3G13960.1	AT3G13960.1	1	2	2	1	arrhythmic	2	11	1	12	12	4	arrhythmic	11	9	1	7	6	3	arrhythmic	6	10	1	2	2	1	arrhythmic	2	6	0.000533194	6	6	3	half-annual	6	3	0.00067205	12	8	6	annual	11	5	0.0892417	13	7
OG0005529	Lthed_scf0020.1_g015590.1	Qgl_scf0030.1_g174440.1	AT1G72650.1	AT1G72650.1	0.000185765	13	11	6	annual	12	8	4.8295e-07	14	10	6	annual	13	7	0.000515664	14	3	7	annual	13	7	2.21074e-06	13	3	6	annual	12	7	0.0555105	12	10	10	arrhythmic	11	7	0.00555261	12	12	5	annual	11	9	0.00278598	16	15
OG0005530	Lthed_scf0020.1_g016570.1	Qgl_scf0030.1_g173200.1	AT3G14010.4	AT3G14010.3	0.0020966	13	4	9	annual	12	1	3.51837e-05	13	4	9	annual	12	1	0.000897152	15	8	10	annual	14	12	0.00430368	11	11	5	annual	10	2	6.4945e-05	12	4	6	annual	11	1	0.441161	23	4	15	arrhythmic	21	1	4.23934e-05	14	9
OG0005532	Lthed_scf0020.1_g023650.1	Qgl_scf0030.1_g166530.1	AT1G72970.1	AT1G72970.1	5.26514e-07	14	10	8	annual	13	7	1	12	12	3	arrhythmic	11	9	1	14	13	4	arrhythmic	13	4	1	9	5	4	arrhythmic	8	9	0.00295565	6	1	3	half-annual	6	10	5.16736e-07	13	10	6	annual	12	7	0.0133705	7	5
OG0005534	Lthed_scf0020.1_g025940.1	Qgl_scf0030.1_g161990.1	AT3G13730.1	AT3G13730.1	0.999963	14	5	5	arrhythmic	13	2	0.236077	12	11	11	arrhythmic	11	8	0.001199	14	13	11	annual	13	4	2.14426e-05	14	13	11	annual	13	4	0.000595398	13	12	4	annual	12	9	0.0125098	7	6	3	arrhythmic	6	3	8.35174e-07	13	2
OG0005535	Lthed_scf0020.1_g028790.1	Qgl_scf0030.1_g160490.1	AT1G51700.1	AT1G51700.1	0.00414645	14	1	7	annual	13	10	0.116391	7	6	3	arrhythmic	6	3	0.455898	13	11	2	arrhythmic	12	2	0.0426208	6	4	4	arrhythmic	6	8	0.00020854	12	12	8	annual	11	9	0.0241961	13	13	3	arrhythmic	12	10	3.89912e-09	14	3
OG0005537	Lthed_scf0020.1_g035890.1	Qgl_scf0030.1_g147560.1	AT1G51940.1	AT1G51940.1	3.82588e-05	14	12	8	annual	13	9	0.00432344	14	1	5	annual	13	10	0.158658	11	10	5	arrhythmic	10	1	0.00656913	13	9	3	annual	12	12	0.00176895	6	2	3	half-annual	6	11	0.0145917	14	13	11	arrhythmic	13	10	4.05039e-06	14	9
OG0005538	Lthed_scf0020.1_g037310.1	Qgl_scf0030.1_g144770.1	AT4G32890.1	AT4G32890.1	1	17	9	8	arrhythmic	16	6	8.78727e-05	12	12	4	annual	11	9	0.0665348	14	13	12	arrhythmic	13	4	0.44282	13	1	10	arrhythmic	12	5	3.44322e-07	12	8	8	annual	11	5	4.4765e-07	13	11	5	annual	12	8	0.0525382	14	12
OG0005539	Lthed_scf0020.1_g039940.1	Qgl_scf0030.1_g143140.1	AT4G29100.1	AT4G29100.1	0.00335478	11	5	7	annual	10	2	6.57041e-06	13	6	6	annual	12	3	0.180947	7	5	4	arrhythmic	6	9	0.081019	13	12	4	arrhythmic	12	3	0.0268046	10	8	5	arrhythmic	9	5	0.00339099	6	1	3	half-annual	6	10	0.00289577	14	12
OG0005540	Lthed_scf0020.1_g042300.1	Qgl_scf0030.1_g140120.1	AT1G15230.1	AT1G15230.1	0.0906447	13	7	2	arrhythmic	12	4	0.70073	18	15	9	arrhythmic	17	11	0.23853	19	15	11	arrhythmic	17	6	0.184897	15	1	8	arrhythmic	14	5	0.00474773	13	3	7	annual	12	12	0.323276	23	22	2	arrhythmic	21	6	0.0911926	14	3
OG0005541	Lthed_scf0020.1_g048060.1	Qgl_scf0030.1_g134120.1	AT3G24490.1	AT3G24490.1	0.00290679	13	12	2	annual	12	9	8.24042e-06	13	11	5	annual	12	8	0.315154	13	5	6	arrhythmic	12	9	0.00112363	13	5	3	annual	12	9	0.0249245	12	11	4	arrhythmic	11	8	0.870406	11	2	4	arrhythmic	10	11	0.277191	14	9
OG0005543	Lthed_scf0020.1_g053180.1	Qgl_scf0030.1_g127840.1	AT1G80300.1	AT1G80300.1	0.00108475	20	16	17	arrhythmic	18	12	0.106293	23	17	17	arrhythmic	21	1	1.31479e-05	12	10	8	annual	11	1	2.9462e-05	13	9	8	annual	12	12	0.528588	6	6	1	arrhythmic	6	3	2.5601e-05	13	5	8	annual	12	2	1.11022e-06	13	11
OG0005545	Lthed_scf0020.1_g056660.1	Qgl_scf0030.1_g123190.1	AT3G15790.3	AT3G15790.3	1.02002e-05	18	8	6	arrhythmic	17	5	0.00539757	20	3	18	arrhythmic	18	12	0.000243224	13	3	8	annual	12	7	0.000621085	13	3	9	annual	12	7	0.00143179	14	10	6	annual	13	7	0.00227078	14	10	9	annual	13	7	1.39012e-08	14	3
OG0005546	Lthed_scf0020.1_g058240.1	Qgl_scf0030.1_g121490.1	AT5G32440.3	AT5G32440.3	0.00374335	23	13	19	arrhythmic	21	10	0.00042672	15	1	9	annual	14	10	0.740478	6	5	3	arrhythmic	6	9	0.330852	11	5	7	arrhythmic	10	9	0.067397	22	15	11	arrhythmic	20	11	0.0104049	23	15	12	arrhythmic	21	11	0.00030396	13	3
OG0005547	Lthed_scf0020.1_g078520.1	Qgl_scf0110.1_g000060.1	AT1G79690.2	AT1G79690.2	0.00796346	13	6	5	annual	12	3	0.0169202	14	9	9	arrhythmic	13	6	0.441364	23	5	17	arrhythmic	21	9	0.00726632	12	1	9	annual	11	5	0.0227759	6	2	2	arrhythmic	6	11	3.74448e-08	13	12	5	annual	12	9	0.27107	23	12
OG0005550	Lthed_scf0040.1_g030710.1	Qgl_scf0050.1_g107100.1	AT3G61050.2	AT3G61050.2	0.115047	6	4	3	arrhythmic	6	1	0.00388009	14	1	4	annual	13	10	0.0222485	14	13	13	arrhythmic	13	4	0.000387261	13	8	4	annual	12	12	0.0046736	12	4	2	annual	11	1	1.28899e-07	13	2	3	annual	12	11	0.293531	14	8
OG0005552	Lthed_scf0040.1_g028980.1	Qgl_scf0050.1_g108430.1	AT3G60800.1	AT3G60800.1	1.17371e-05	14	8	11	annual	13	5	0.529846	4	4	2	arrhythmic	4	1	0.0232989	13	1	3	arrhythmic	12	5	0.0025311	13	9	12	annual	12	12	9.54517e-05	13	11	6	annual	12	8	0.000270145	12	1	3	annual	11	10	0.0807262	15	1
OG0005553	Lthed_scf0040.1_g028860.1	Qgl_scf0050.1_g108500.1	AT2G45340.1	AT2G45340.1	0.000263062	18	8	13	arrhythmic	17	5	0.000545351	13	12	4	annual	12	9	5.77176e-05	14	13	12	annual	13	4	0.018638	12	6	3	arrhythmic	11	10	0.00470424	13	12	4	annual	12	9	1.31062e-06	13	11	5	annual	12	8	1.56841e-07	14	1
OG0005554	Lthed_scf0040.1_g028140.1	Qgl_scf0050.1_g109340.1	AT5G04440.1	AT5G04440.1	0.772397	12	11	10	arrhythmic	11	8	0.0598746	13	13	7	arrhythmic	12	10	0.000167559	14	3	10	annual	13	7	5.27651e-05	11	7	4	annual	10	11	0.0896899	13	13	2	arrhythmic	12	10	0.00717759	14	10	6	annual	13	7	0.00674605	13	12
OG0005555	Lthed_scf0040.1_g028120.1	Qgl_scf0050.1_g109390.1	AT5G04430.1	AT5G04430.2	6.75716e-07	13	4	7	annual	12	1	3.02379e-10	13	4	6	annual	12	1	6.80948e-08	13	9	9	annual	12	1	1.18732e-08	13	9	7	annual	12	12	0.000598951	12	4	8	annual	11	1	9.71491e-05	13	4	8	annual	12	1	3.20414e-05	14	9
OG0005556	Lthed_scf0040.1_g027990.1	Qgl_scf0050.1_g109630.1	AT5G58330.1	AT5G58330.1	0.0125387	7	6	3	arrhythmic	6	3	0.946264	6	2	3	arrhythmic	6	11	0.00358006	13	7	3	annual	12	11	8.66895e-07	13	7	4	annual	12	11	3.10788e-05	12	3	9	annual	11	12	5.37247e-08	13	2	8	annual	12	11	0.154149	23	22
OG0005558	Lthed_scf0040.1_g023630.1	Qgl_scf0050.1_g113300.1	AT2G28370.1	AT2G28370.1	0.0490081	12	9	6	arrhythmic	11	6	0.000113524	13	11	7	annual	12	8	0.838491	12	3	6	arrhythmic	11	7	0.532167	14	14	9	arrhythmic	13	5	0.0049212	12	1	1	annual	11	10	8.37111e-06	13	11	5	annual	12	8	0.0563452	12	7
OG0005559	Lthed_scf0040.1_g023560.1	Qgl_scf0050.1_g113310.1	AT5G13570.1	AT5G13570.1	0.800967	7	4	4	arrhythmic	6	1	0.0967229	13	9	10	arrhythmic	12	6	0.0310944	6	5	3	arrhythmic	6	9	0.458016	6	3	4	arrhythmic	6	7	0.0501178	12	5	2	arrhythmic	11	2	0.0793425	10	4	7	arrhythmic	9	1	0.0740018	7	3
OG0005560	Lthed_scf0040.1_g022660.1	Qgl_scf0050.1_g113980.1	AT2G28880.1	AT2G28880.1	0.000343343	12	9	2	annual	11	6	0.000298429	13	4	6	annual	12	1	1.37392e-07	14	9	8	annual	13	1	7.61218e-06	12	10	8	annual	11	1	0.00105741	13	4	7	annual	12	1	0.000435959	13	4	7	annual	12	1	2.89504e-08	14	9
OG0005561	Lthed_scf0040.1_g022280.1	Qgl_scf0050.1_g114480.1	AT3G54890.1	AT3G54890.1	1.2317e-08	13	11	6	annual	12	8	1.16843e-10	13	11	6	annual	12	8	2.30251e-08	13	3	8	annual	12	7	1.33902e-08	13	3	7	annual	12	7	1.18916e-08	12	10	6	annual	11	7	6.45937e-07	14	10	6	annual	13	7	9.26568e-06	14	3
OG0005562	Lthed_scf0040.1_g020340.1	Qgl_scf0050.1_g117030.1	AT3G12620.2	AT3G12620.2	0.224143	14	14	10	arrhythmic	13	10	0.507901	11	10	3	arrhythmic	10	7	0.0273403	13	13	4	arrhythmic	12	4	0.0323836	12	10	8	arrhythmic	11	1	0.256087	12	11	7	arrhythmic	11	8	0.0959321	11	1	3	arrhythmic	10	10	0.280752	13	1
OG0005563	Lthed_scf0040.1_g019790.1	Qgl_scf0050.1_g117430.1	AT3G12360.1	AT3G12360.1	0.00115736	18	2	6	arrhythmic	17	11	4.18992e-06	13	3	10	annual	12	12	0.0323452	14	12	1	arrhythmic	13	3	7.25685e-05	11	11	5	annual	10	2	0.981691	6	3	5	arrhythmic	6	12	1.53737e-05	14	2	9	annual	13	11	0.128921	14	10
OG0005565	Lthed_scf0040.1_g017260.1	Qgl_scf0050.1_g118890.1	AT5G13660.1	AT5G13660.1	1.29358e-12	13	3	8	annual	12	12	1.64838e-10	13	3	9	annual	12	12	6.92368e-06	15	4	9	annual	14	8	0.00851315	12	7	7	annual	11	11	1.16777e-06	13	2	7	annual	12	11	2.75644e-10	14	1	9	annual	13	10	5.36628e-08	14	8
OG0005566	Lthed_scf0040.1_g016780.1	Qgl_scf0050.1_g119290.1	AT3G12590.1	AT3G12590.1	0.0486597	20	20	7	arrhythmic	18	4	3.03965e-05	14	2	10	annual	13	11	0.0143495	7	3	3	arrhythmic	6	7	0.00171273	13	9	9	annual	12	12	0.0920184	6	4	3	arrhythmic	6	1	6.29065e-08	14	3	7	annual	13	12	0.0313957	14	10
OG0005572	Lthed_scf0040.1_g010300.1	Qgl_scf0050.1_g124720.1	AT3G54000.3	AT3G54000.3	0.957883	7	2	4	arrhythmic	6	11	0.000307883	12	12	7	annual	11	9	0.0475168	13	10	5	arrhythmic	12	1	0.101741	12	6	4	arrhythmic	11	10	0.000676121	13	12	3	annual	12	9	2.25406e-06	13	10	6	annual	12	7	1.71038e-07	15	3
OG0005573	Lthed_scf0040.1_g009620.1	Qgl_scf0050.1_g125230.1	AT5G05830.1	AT5G05830.1	0.0965552	13	9	8	arrhythmic	12	6	7.73105e-06	12	12	5	annual	11	9	0.00640665	14	13	12	annual	13	4	1	18	14	14	arrhythmic	17	5	1.2486e-05	12	9	7	annual	11	6	2.50139e-07	13	12	4	annual	12	9	0.00117277	7	7
OG0005574	Lthed_scf0040.1_g009060.1	Qgl_scf0050.1_g125580.1	AT5G05790.2	AT5G05790.2	0.172366	7	4	4	arrhythmic	6	1	6.97656e-05	12	4	8	annual	11	1	0.00848044	14	8	5	annual	13	12	0.185627	14	7	7	arrhythmic	13	11	0.924054	6	3	5	arrhythmic	6	12	0.00079874	13	5	3	annual	12	2	0.929	14	11
OG0005577	Lthed_scf0040.1_g007120.1	Qgl_scf0050.1_g126650.1	AT2G40110.1	AT2G40110.1	2.27097e-05	14	8	8	annual	13	5	0.00622779	12	12	3	annual	11	9	0.00255698	15	12	8	annual	14	3	0.00132348	23	15	4	arrhythmic	21	6	4.8833e-05	13	8	8	annual	12	5	1.05798e-10	13	10	7	annual	12	7	0.000133445	14	13
OG0005578	Lthed_scf0040.1_g005380.1	Qgl_scf0050.1_g127800.1	AT1G07780.9	AT1G07780.9	0.00106639	7	6	4	half-annual	6	3	1.12484e-05	13	9	8	annual	12	6	0.00286504	14	3	6	annual	13	7	0.0262312	11	3	9	arrhythmic	10	7	1.72825e-06	13	6	4	annual	12	3	3.48292e-06	13	9	8	annual	12	6	0.417997	22	12
OG0005580	Lthed_scf0040.1_g005250.1	Qgl_scf0050.1_g127910.1	AT3G55990.1	AT3G55990.1	0.000146905	13	9	9	annual	12	6	2.32047e-10	13	12	4	annual	12	9	1.02745e-10	14	13	11	annual	13	4	7.58821e-07	12	4	5	annual	11	8	0.000348423	13	9	9	annual	12	6	1.19997e-07	12	1	4	annual	11	10	0.0324597	13	6
OG0005581	Lthed_scf0040.1_g004950.1	Qgl_scf0050.1_g128250.1	AT5G05520.1	AT5G05520.1	0.533978	7	7	4	arrhythmic	6	4	0.646892	7	6	3	arrhythmic	6	3	0.103801	14	13	4	arrhythmic	13	4	0.784955	23	22	19	arrhythmic	21	12	0.0418841	6	2	2	arrhythmic	6	11	1.66102e-05	13	10	6	annual	12	7	0.41568	7	5
OG0005585	Lthed_scf0100.1_g104480.1	Qgl_scf0100.1_g000620.1	AT4G35470.1	AT4G35470.1	0.00258348	18	16	11	arrhythmic	17	12	2.44183e-05	12	4	7	annual	11	1	0.0123529	14	11	5	arrhythmic	13	2	2.55086e-05	13	11	5	annual	12	2	0.00561471	12	3	10	annual	11	12	3.04196e-07	14	2	7	annual	13	11	0.0124857	14	10
OG0005586	Lthed_scf0080.1_g034180.1	Qgl_scf0070.1_g075630.1	AT5G65960.1	AT5G65960.1	2.4279e-06	13	4	8	annual	12	1	3.25133e-06	13	4	7	annual	12	1	0.948171	14	12	1	arrhythmic	13	3	0.0174192	12	10	7	arrhythmic	11	1	3.57936e-10	12	4	8	annual	11	1	2.73269e-08	13	4	6	annual	12	1	0.357946	13	11
OG0005587	Lthed_scf0100.1_g104350.1	Qgl_scf0100.1_g000720.1	AT2G17480.1	AT2G17480.1	2.24355e-05	14	2	7	annual	13	11	0.000792286	11	6	7	annual	10	3	8.4887e-05	13	11	8	annual	12	2	6.02574e-06	12	11	7	annual	11	2	2.07462e-06	13	2	8	annual	12	11	0.000706139	13	4	6	annual	12	1	0.0935277	18	6
OG0005588	Lthed_scf0100.1_g103970.1	Qgl_scf0100.1_g001230.1	AT4G35510.1	AT4G35510.1	0.320732	13	4	5	arrhythmic	12	1	1.19684e-07	13	4	7	annual	12	1	0.24719	7	7	4	arrhythmic	6	11	6.19698e-05	11	9	5	annual	10	12	0.184275	19	5	1	arrhythmic	17	2	8.46171e-06	14	3	7	annual	13	12	0.316284	15	9
OG0005589	Lthed_scf0100.1_g103750.1	Qgl_scf0100.1_g001380.1	AT1G20693.2	AT1G20693.2	0.285984	6	2	4	arrhythmic	6	11	0.487864	12	10	6	arrhythmic	11	7	0.215047	14	12	3	arrhythmic	13	3	9.36661e-05	13	5	6	annual	12	9	0.400661	11	4	7	arrhythmic	10	1	0.268438	12	8	5	arrhythmic	11	5	0.0250715	14	10
OG0005591	Lthed_scf0100.1_g102760.1	Qgl_scf0100.1_g002470.1	AT4G35730.1	AT4G35730.1	1	14	8	12	arrhythmic	13	5	0.0117675	13	12	5	arrhythmic	12	9	0.639791	14	13	10	arrhythmic	13	4	0.588205	21	14	11	arrhythmic	19	5	0.000253215	12	8	8	annual	11	5	1.69105e-06	13	10	6	annual	12	7	0.000255326	14	12
OG0005593	Lthed_scf0050.1_g093410.1	Qgl_scf0040.1_g104150.1	AT3G04910.1	AT3G04910.1	7.91504e-06	12	8	8	annual	11	5	7.4571e-07	13	12	4	annual	12	9	0.000172417	14	13	7	annual	13	4	0.083426	11	3	4	arrhythmic	10	7	2.83662e-06	12	9	6	annual	11	6	8.29656e-09	13	11	5	annual	12	8	0.00479733	14	13
OG0005594	Lthed_scf0050.1_g093820.1	Qgl_scf0040.1_g104330.1	AT1G54500.1	AT1G54500.1	0.00235522	7	5	4	half-annual	6	2	0.317446	13	10	7	arrhythmic	12	7	0.00224458	12	6	3	annual	11	10	0.0365096	23	22	16	arrhythmic	21	12	1.49556e-05	13	5	7	annual	12	2	0.000169183	14	4	8	annual	13	1	0.00357314	12	12
OG0005595	Lthed_scf0050.1_g095730.1	Qgl_scf0040.1_g109540.1	AT3G04950.1	AT3G04950.1	0.013455	13	13	3	arrhythmic	12	10	1.76493e-06	13	13	4	annual	12	10	0.000613644	14	1	9	annual	13	5	0.000967408	13	6	3	annual	12	10	0.125493	6	1	2	arrhythmic	6	10	1.05229e-05	13	10	7	annual	12	7	0.00188111	15	3
OG0005596	Lthed_scf0050.1_g095790.1	Qgl_scf0040.1_g109600.1	AT3G05090.3	AT3G05090.3	0.375665	23	23	8	arrhythmic	21	7	0.101834	13	4	10	arrhythmic	12	1	0.958733	6	5	2	arrhythmic	6	9	0.0302839	11	11	7	arrhythmic	10	2	0.0139153	12	4	4	arrhythmic	11	1	0.482272	23	22	7	arrhythmic	21	6	0.498245	7	3
[truncated: 10,388 more rows]
[truncated: 11 more columns]

## Sheet: Period
Distribution of period (month) across rhythmic genes
Period (month)	Leaf				Bud
	L. edulis	L. glaber	Q. glauca	Q. acuta	L. edulis	L. glaber	Q. glauca	Q. acuta
[truncated: 21 more rows]

## Sheet: Peak
Distribution of seasonal peaks (month) across rhythmic genes
[truncated: 26 more rows]

[truncated: 1 more sheets: Half-annual]
